# Supplementary material for: Transcriptional Inhibition of Host Viral Entry Proteins as a Therapeutic Strategy for SARS-CoV-2
Source: Preprints.org preprint supplement (doi:10.20944/preprints202003.0360.v1), 2020-03-24
Supplement: Supplementary file 1 [file supplementary]

## Sheet: CTSL_ConnectivityMap_hits.txt
Target gene	Cell line	p-value (any dosage)	p-value (dosage less than 1uM)	p-value (dosage 0.5uM to 2uM)	p-value (dosage less than 0.5uM)	p-value (dosage 0.2uM to 1uM)	DMSO median z-score	median z-score, any dosage	median z-score (dosage less than 1uM)	median z-score (dosage 0.5uM to 2uM)	median z-score (dosage less than 0.5uM)	median z-score (dosage 0.2uM to 1uM)	Compound ID	Compound name	Notes
CTSB	HT29	0	NA	NA	NA	NA	-0.19715	16.5102	NA	NA	NA	NA	BRD-K50691590	bortezomib	*** In our experience, bortezomib and MG-132 show up the top of the list for every gene, and should be ignored for repurposing purposes
CTSB	HT29	0	NA	NA	NA	NA	-0.19715	15.8869	NA	NA	NA	NA	BRD-K60230970	MG-132
CTSB	MCF7	0	NA	NA	NA	NA	-0.2102	7.4056	NA	NA	NA	NA	BRD-K50691590	bortezomib
CTSB	MCF7	0	NA	NA	NA	NA	-0.2102	7.5134	NA	NA	NA	NA	BRD-K60230970	MG-132
CTSB	HA1E	1.46933e-133	NA	NA	NA	NA	-0.0725	-1.531	NA	NA	NA	NA	BRD-K50691590	bortezomib
CTSB	A549	3.4634e-68	2.35145e-15	4.1571e-39	4.1571e-39	5.59495e-15	0	-2.5662	-2.4788	-2.3433	-2.3433	-2.66525	BRD-K49865102	PD-0325901
CTSB	HA1E	4.76914e-52	NA	NA	NA	NA	-0.0725	0.6281	NA	NA	NA	NA	BRD-K60230970	MG-132
CTSB	A375	4.53651e-46	5.62971e-09	9.35305e-26	9.35305e-26	4.99601e-10	-0.1133	-1.7566	-1.5832	-1.7515	-1.7515	-1.6661	BRD-K49865102	PD-0325901
CTSB	A375	2.13243e-38	NA	NA	NA	NA	-0.1133	0.83955	NA	NA	NA	NA	BRD-K60230970	MG-132
CTSB	PC3	1.25304e-37	NA	NA	NA	NA	-0.0636	0.4504	NA	NA	NA	NA	BRD-K60230970	MG-132
CTSB	HA1E	2.72512e-31	4.7859e-09	3.36827e-16	3.36827e-16	8.24415e-07	-0.0725	2.95935	2.8534	2.95935	2.95935	3.93945	BRD-K79090631	CGP-60474
CTSB	A549	1.0466e-30	1.42823e-11	1.99534e-22	1.99534e-22	3.79485e-06	0	0.9099	1.2561	1.0387	1.0387	0.8583	BRD-K49328571	dasatinib
CTSB	HT29	2.02568e-27	1.72904e-09	4.98356e-13	4.98356e-13	2.05059e-08	-0.19715	2.3155	3.30035	2.19	2.19	2.7753	BRD-K79090631	CGP-60474
CTSB	MCF7	1.84498e-25	1.91167e-08	5.74077e-13	5.74077e-13	1.63714e-05	-0.2102	0.7629	0.9343	0.6745	0.6745	0.7871	BRD-K49328571	dasatinib
CTSB	MCF7	1.75795e-24	3.76403e-07	1.41292e-06	1.41292e-06	4.50008e-08	-0.2102	1.1367	1.90725	0.5631	0.5631	2.2264	BRD-K21680192	mitoxantrone
CTSB	A375	1.83199e-22	3.81839e-05	3.76623e-12	3.76623e-12	0.000504414	-0.1133	-2.2255	-3.57085	-3.57085	-3.57085	-2.685	BRD-K57080016	selumetinib
CTSB	A375	1.13082e-21	3.94656e-05	2.56515e-12	2.56515e-12	5.06901e-05	-0.1133	-2.2702	-3.00045	-2.42685	-2.42685	-3.3243	BRD-K05804044	AZ-628
CTSB	A549	2.30618e-21	0.000128973	8.44809e-10	8.44809e-10	0.000205243	0	-1.7776	-1.9061	-1.19455	-1.19455	-1.40165	BRD-K17743125	belinostat
CTSB	HCC515	4.02688e-21	4.36283e-05	2.18292e-10	2.18292e-10	2.56044e-07	-0.4432	0.856	0.4516	0.3797	0.3797	1.2078	BRD-K49865102	PD-0325901
CTSB	HT29	6.94006e-21	3.5261e-05	7.58216e-10	7.58216e-10	3.37896e-05	-0.19715	5.2089	7.83065	2.82725	2.82725	10.299	BRD-K86797399	SB-939
CTSB	A375	1.24059e-20	0.000948828	4.77098e-11	4.77098e-11	6.01398e-05	-0.1133	-2.8698	-2.8823	-2.8698	-2.8698	-3.50925	BRD-K09951645	dabrafenib
CTSB	A375	2.49278e-20	4.51469e-05	2.89032e-12	2.89032e-12	7.37686e-05	-0.1133	-2.17715	-3.5025	-2.1583	-2.1583	-3.13145	BRD-K05104363	PD-184352
CTSB	A549	5.66279e-20	0.000853778	7.14862e-10	7.14862e-10	0.000160934	0	2.3501	1.9483	1.8261	1.8261	2.2579	BRD-K92428232	GSK-461364
CTSB	A375	2.20298e-19	1.40768e-06	5.45003e-21	5.45003e-21	8.37418e-05	-0.1133	0.7898	1.22875	1.24215	1.24215	0.9602	BRD-K49328571	dasatinib
CTSB	HA1E	4.04038e-19	0.000152397	3.64706e-10	3.64706e-10	9.03686e-05	-0.0725	-2.25425	-2.64755	-2.71415	-2.71415	-2.16945	BRD-K37687095	AZD-8330
CTSB	HCC515	1.59135e-18	6.21463e-07	4.67581e-16	4.67581e-16	2.12485e-05	-0.4432	0.7362	1.3635	1.0703	1.0703	0.7362	BRD-K49328571	dasatinib
CTSB	A549	2.27685e-18	0.000214458	5.75877e-08	5.75877e-08	4.42725e-05	0	1.5891	1.5891	0.9137	0.9137	1.76335	BRD-K55187425	rigosertib
CTSB	A375	3.01364e-18	4.22157e-05	7.81552e-08	7.81552e-08	7.55002e-05	-0.1133	-2.5067	-2.56115	-2.3004	-2.3004	-1.88885	BRD-K37687095	AZD-8330
CTSB	MCF7	3.61041e-18	2.65483e-05	4.85273e-09	4.85273e-09	0.00507398	-0.2102	4.2195	3.8109	3.1578	3.1578	4.42235	BRD-K59317601	MLN-0128
CTSB	MCF7	4.44284e-18	3.87982e-05	1.37429e-07	1.37429e-07	2.52345e-05	-0.2102	2.3918	1.97605	1.52295	1.52295	3.34455	BRD-K86797399	SB-939
CTSB	HT29	5.68886e-18	0.00109672	1.76857e-08	1.76857e-08	0.000633917	-0.19715	2.5938	2.01785	1.5118	1.5118	2.8959	BRD-K64890080	BI-2536
CTSB	HA1E	1.22417e-17	4.98532e-05	2.03835e-05	2.03835e-05	7.07818e-05	-0.0725	-0.951	-0.90095	-0.6745	-0.6745	-0.76495	BRD-K49865102	PD-0325901
CTSB	MCF7	4.77699e-17	9.22449e-05	0.000140786	0.000140786	9.4228e-06	-0.2102	1.49455	1.9677	0.60885	0.60885	1.5067	BRD-K42191735	buparlisib
CTSB	A549	6.53308e-17	0.00017741	8.01221e-08	8.01221e-08	0.000149706	0	2.3526	1.7376	1.36245	1.36245	2.3526	BRD-K59317601	MLN-0128
CTSB	MCF7	8.68822e-17	0.000233668	2.66116e-09	2.66116e-09	0.00258423	-0.2102	1.7343	1.1569	1.1569	1.1569	2.22955	BRD-K42918627	GSK-2126458
CTSB	MCF7	1.00961e-16	0.00605831	2.19768e-09	2.19768e-09	0.000160576	-0.2102	1.439	1.3174	1.7376	1.7376	1.55455	BRD-K13662825	dinaciclib
CTSB	HA1E	1.58151e-16	0.000152397	3.65215e-08	3.65215e-08	5.01595e-05	-0.0725	2.0105	1.91735	1.9154	1.9154	2.3008	BRD-K13662825	dinaciclib
CTSB	HA1E	1.65501e-16	0.000761626	5.81168e-06	5.81168e-06	4.34612e-05	-0.0725	1.8344	1.00065	0.7752	0.7752	2.1475	BRD-A39996500	radicicol
CTSB	MCF7	3.31896e-16	0.0014663	1.55867e-09	1.55867e-09	0.201095	-0.2102	2.09725	1.725	1.99005	1.99005	0.50735	BRD-K92428232	GSK-461364
CTSB	HEPG2	4.41118e-16	0.000348356	6.94523e-07	6.94523e-07	0.000127322	-0.2475	2.13305	1.67695	1.2049	1.2049	2.6607	BRD-A39996500	radicicol
CTSB	A549	4.62507e-16	7.91889e-05	1.16536e-11	1.16536e-11	0.00018733	0	-1.7584	-1.55895	-1.98225	-1.98225	-1.982	BRD-K37764012	PF-03758309
CTSB	A549	7.20251e-16	0.000968565	8.64341e-08	8.64341e-08	0.000831919	0	-1.8484	-1.6675	-1.3706	-1.3706	-2.4772	BRD-K05804044	AZ-628
CTSB	HT29	2.64718e-15	0.00697168	0.212844	0.212844	1.58442e-05	-0.19715	1.8267	0.67155	-0.09275	-0.09275	1.8267	BRD-K21680192	mitoxantrone
CTSB	HT29	5.35532e-15	0.000494535	1.03273e-05	1.03273e-05	8.01948e-05	-0.19715	2.0169	2.00895	1.1843	1.1843	3.58525	BRD-K54256913	MK-1775
CTSB	PC3	6.67769e-15	4.86838e-05	0.000182189	0.000182189	2.88166e-05	-0.0636	2.5821	1.99585	0.7604	0.7604	2.7154	BRD-A39996500	radicicol
CTSB	MCF7	9.26578e-15	3.20334e-05	0.000175175	0.000175175	2.7927e-05	-0.2102	2.28925	2.37195	0.8771	0.8771	2.24875	BRD-K70511574	HMN-214
CTSB	A375	1.24306e-14	0.015475	1.82628e-08	1.82628e-08	8.35378e-05	-0.1133	-1.7157	-1.70625	-1.7029	-1.7029	-2.4353	BRD-K56343971	vemurafenib
CTSB	A549	1.3417e-14	0.000136349	1.20636e-05	1.20636e-05	0.000984734	0	-1.5514	-1.2864	-0.9426	-0.9426	-1.05945	BRD-K86797399	SB-939
CTSB	A549	1.97734e-14	3.25043e-07	0.00236833	0.00236833	2.29556e-08	0	1.32975	1.7454	0.6046	0.6046	2.1998	BRD-K79090631	CGP-60474
CTSB	MCF7	2.26694e-14	0.0162712	1.08413e-05	1.08413e-05	0.00980922	-0.2102	1.11745	1.1054	0.9123	0.9123	0.2067	BRD-K12184916	NVP-BEZ235
CTSB	A549	2.27601e-14	0.00293754	3.28607e-06	3.28607e-06	6.52517e-05	0	-1.29255	-1.296	-1.26975	-1.26975	-1.88495	BRD-K68407802	KIN001-055
CTSB	A375	2.89657e-14	0.00655172	1.57843e-08	1.57843e-08	0.00952013	-0.1133	1.30335	1.37685	1.3546	1.3546	1.72595	BRD-K92428232	GSK-461364
CTSB	MCF7	2.99024e-14	0.00503045	3.63197e-06	3.63197e-06	0.000183546	-0.2102	1.11735	1.0314	0.7291	0.7291	1.1415	BRD-K50140147	NVP-TAE684
CTSB	HA1E	3.1642e-14	0.0133312	1.20599e-07	1.20599e-07	0.0271414	-0.0725	2.0816	0.78925	1.79545	1.79545	0.76905	BRD-K92428232	GSK-461364
CTSB	A549	3.40799e-14	0.00437441	4.42334e-06	4.42334e-06	0.000247877	0	-1.18195	-1.0026	-1.0026	-1.0026	-1.5828	BRD-K21025364	NVP-TAE226
CTSB	A375	5.12737e-14	0.00310644	6.68143e-07	6.68143e-07	0.00923648	-0.1133	1.5353	1.3715	1.11015	1.11015	1.46345	BRD-K36740062	GSK-1070916
CTSB	HT29	5.4534e-14	0.0520454	1.42939e-06	1.42939e-06	0.000560202	-0.19715	1.2373	0.57965	1.1111	1.1111	1.55855	BRD-K92428232	GSK-461364
CTSB	A549	6.04027e-14	3.56757e-05	1.06339e-10	1.06339e-10	2.61204e-05	0	1.91735	2.18265	1.69745	1.69745	2.88485	BRD-K67578145	GDC-0879
CTSB	HT29	6.4831e-14	0.000876916	2.33879e-06	2.33879e-06	0.000536068	-0.19715	2.7931	2.45095	1.8158	1.8158	4.11865	BRD-K13662825	dinaciclib
CTSB	PC3	7.61901e-14	0.0551419	0.000372084	0.000372084	0.000276143	-0.0636	-1.6871	-0.7159	-0.9902	-0.9902	-1.621	BRD-K17743125	belinostat
CTSB	MCF7	1.06437e-13	4.65213e-05	3.75289e-12	3.75289e-12	0.126987	-0.2102	2.299	2.55875	2.401	2.401	2.17285	BRD-K37764012	PF-03758309
CTSB	A549	1.13631e-13	0.0021403	6.7942e-09	3.58448e-08	0.00228262	0	-0.9672	-1.1014	-1.14255	-1.1014	-1.0232	BRD-K54606188	JQ1-(+)
CTSB	HCC515	1.16549e-13	3.12288e-06	3.55632e-09	3.55632e-09	0.00137257	-0.4432	0.69	2.24105	0.45215	0.45215	1.5723	BRD-K79090631	CGP-60474
CTSB	A549	1.50343e-13	0.000284625	4.14459e-08	4.14459e-08	0.000251878	0	-1.2622	-1.5428	-1.1991	-1.1991	-1.6675	BRD-K68336408	tyrphostin-AG-1478
CTSB	A375	1.60312e-13	NA	NA	NA	NA	-0.1133	0.35515	NA	NA	NA	NA	BRD-K50691590	bortezomib
CTSB	MCF7	1.62569e-13	0.000148773	2.80957e-07	2.80957e-07	0.00770016	-0.2102	0.7393	0.8356	0.7393	0.7393	0.6276	BRD-K46056750	AZD-7762
CTSB	A549	1.67653e-13	0.000691614	3.77124e-06	4.52974e-06	0.00073918	0	-1.0907	-1.0907	-0.9952	-0.9672	-0.9443	BRD-K08109215	I-BET-762
CTSB	A549	2.52624e-13	0.000720879	3.66437e-06	3.66437e-06	0.00610961	0	1.2523	1.0734	0.8299	0.8299	1.2701	BRD-K74514084	pazopanib
CTSB	MCF7	2.55001e-13	2.29198e-05	2.16931e-07	2.2129e-09	0.00274405	-0.2102	6.72795	6.3798	6.5203	6.47	5.8092	BRD-K68552125	phorbol-myristate-acetate
CTSB	MCF7	2.55699e-13	0.00272786	2.18755e-07	2.18755e-07	0.00272786	-0.2102	10.7078	11.2243	6.8417	6.8417	11.4493	BRD-A66419424	ixazomib-citrate
CTSB	MCF7	2.60638e-13	0.00273594	2.18755e-07	2.18755e-07	0.00275217	-0.2102	8.0009	8.3512	8.3512	8.3512	8.0308	BRD-K59325863	delanzomib
CTSB	MCF7	2.71541e-13	0.00275217	2.2369e-07	2.2369e-07	0.00281798	-0.2102	4.88245	4.4328	4.4328	4.4328	3.704	BRD-K90195324	bazedoxifene
CTSB	MCF7	2.72283e-13	0.00275217	2.21827e-07	2.21827e-07	0.00275217	-0.2102	4.43435	4.4911	4.8194	4.8194	4.4193	BRD-K56957086	dacinostat
CTSB	HT29	2.78627e-13	0.00278416	2.30594e-07	2.30594e-07	0.00273058	-0.19715	17.7621	15.8326	16.037	16.037	17.8928	BRD-K88510285	bortezomib
CTSB	MCF7	2.90714e-13	0.00283466	2.4933e-07	2.4933e-07	0.00272786	-0.2102	6.3083	4.5764	3.2382	3.2382	7.5102	BRD-K37890730	camptothecin
CTSB	A375	3.0118e-13	0.00280912	2.35703e-07	2.35703e-07	0.00280013	-0.1133	4.9888	5.0822	4.9888	4.9888	5.3872	BRD-A24560335	efatutazone
CTSB	A549	3.02892e-13	0.00428134	1.35897e-08	1.35897e-08	0.0118794	0	1.2126	0.75	1.2126	1.2126	0.8422	BRD-K76401790	JNK-IN-5A
CTSB	MCF7	3.05337e-13	0.00276849	2.36503e-07	2.36503e-07	0.00285143	-0.2102	4.48035	4.4706	4.3065	4.3065	4.783	BRD-K63828191	raloxifene
CTSB	PC3	3.16049e-13	0.00284031	2.44469e-07	2.44469e-07	0.00284031	-0.0636	3.4759	3.6188	3.4581	3.4581	3.3764	BRD-A05821830	docetaxel
CTSB	A375	3.17655e-13	0.00280912	2.43666e-07	2.43666e-07	0.00286364	-0.1133	4.80065	4.8964	4.7928	4.7928	3.8169	BRD-A97437073	rosiglitazone
CTSB	MCF7	3.2685e-13	0.00284303	2.58491e-07	2.58491e-07	0.00287674	-0.2102	4.30245	4.7767	4.1408	4.1408	4.0721	BRD-A03249105	fulvestrant
CTSB	HT29	3.3927e-13	0.00284787	2.5112e-07	2.5112e-07	0.00284787	-0.19715	12.4035	13.3577	12.9354	12.9354	13.6682	BRD-K83837640	JNJ-26481585
CTSB	MCF7	3.52716e-13	0.0028014	2.98494e-07	2.98494e-07	0.00275217	-0.2102	4.48035	4.0822	3.4846	3.4846	4.4398	BRD-A03506276	XL-888
CTSB	MCF7	3.64407e-13	0.00272786	2.64289e-07	2.64289e-07	0.00304191	-0.2102	3.28145	7.4143	2.8268	2.8268	2.8605	BRD-K73088654	floxuridine
CTSB	HA1E	3.66943e-13	0.000245924	0.000313451	0.000313451	5.61446e-05	-0.0725	1.6914	1.32635	1.0811	1.0811	1.91355	BRD-K77908580	entinostat
CTSB	MCF7	3.78527e-13	0.00300644	3.06e-07	3.06e-07	0.00289374	-0.2102	3.1006	2.8463	2.3776	2.3776	3.2739	BRD-K69776681	volasertib
CTSB	MCF7	3.80588e-13	0.00284303	3.13687e-07	3.13687e-07	0.00281798	-0.2102	3.7837	3.5535	3.4089	3.4089	4.2442	BRD-K44844162	taselisib
CTSB	HCC515	3.83102e-13	9.95439e-05	0.000624936	0.000624936	2.66429e-05	-0.4432	1.3382	1.1399	0.6486	0.6486	3.5235	BRD-K88378636	withaferin-a
CTSB	HA1E	4.05902e-13	0.000147936	1.25218e-06	1.25218e-06	0.000122538	-0.0725	3.7147	4.1336	2.2403	2.2403	4.3086	BRD-K87909389	alvocidib
CTSB	A375	4.15481e-13	0.00299462	2.73226e-07	2.73226e-07	0.00294723	-0.1133	2.77495	2.4636	2.6901	2.6901	2.9834	BRD-K78567475	dolastatin-10
CTSB	A375	4.22881e-13	0.00323194	2.91892e-07	2.91892e-07	0.00299462	-0.1133	3.1223	1.9655	3.1223	3.1223	2.304	BRD-K74057757	indibulin
CTSB	MCF7	4.24293e-13	0.0018757	0.000229518	0.000229518	0.000968495	-0.2102	1.23015	0.961	0.4787	0.4787	0.7551	BRD-K83963101	MLN-8054
CTSB	MCF7	4.25344e-13	0.002928	3.1629e-07	3.1629e-07	0.00287674	-0.2102	3.2151	2.8229	2.8229	2.8229	3.2548	BRD-K74057757	indibulin
CTSB	MCF7	4.31143e-13	0.00294527	2.67235e-07	2.67235e-07	0.00294527	-0.2102	2.95145	3.1409	3.2327	3.2327	3.1409	BRD-K83837640	JNJ-26481585
CTSB	MCF7	4.5698e-13	0.00288523	3.90192e-07	3.90192e-07	0.00273594	-0.2102	4.30535	3.4408	2.8558	2.8558	6.4242	BRD-K89561498	SN-38
CTSB	PC3	4.63665e-13	0.00275791	3.83642e-07	3.83642e-07	0.00273989	-0.0636	4.88525	6.7813	3.8422	3.8422	7.2235	BRD-K89561498	SN-38
CTSB	MCF7	4.66345e-13	0.00307777	2.90364e-07	2.90364e-07	0.00307777	-0.2102	3.6662	3.6576	3.6576	3.6576	4.9998	BRD-K38852836	ganetespib
CTSB	MCF7	4.88938e-13	0.00272786	4.22351e-07	4.22351e-07	0.00272786	-0.2102	7.40815	7.5364	5.2755	5.2755	7.8458	BRD-A36331462	oprozomib
CTSB	HT29	4.89132e-13	0.000933473	0.000384083	0.000384083	0.000103441	-0.19715	1.5868	1.0776	0.62215	0.62215	2.36215	BRD-K70511574	HMN-214
CTSB	MCF7	5.11221e-13	0.00272786	4.36988e-07	4.36988e-07	0.00273594	-0.2102	5.8424	9.2207	4.1705	4.1705	6.2006	BRD-K99475619	genz-644282
CTSB	HT29	5.13999e-13	0.00308644	3.15174e-07	3.15174e-07	0.00317669	-0.19715	7.69045	7.5538	7.5538	7.5538	6.4463	BRD-K61397605	romidepsin
CTSB	A375	5.14091e-13	0.00283626	4.25585e-07	4.25585e-07	0.00275555	-0.1133	5.20215	4.1313	2.6829	2.6829	7.0231	BRD-K96123349	brequinar
CTSB	MCF7	5.19569e-13	0.00316911	4.16061e-07	4.16061e-07	0.00286828	-0.2102	3.10865	2.1818	2.1508	2.1508	3.5028	BRD-K67844266	pevonedistat
CTSB	HT29	5.4368e-13	0.00286632	4.17958e-07	4.17958e-07	0.00282953	-0.19715	11.9091	13.9426	8.3811	8.3811	12.1025	BRD-K78659596	ixazomib
CTSB	HT29	5.4368e-13	0.00305688	3.41888e-07	3.41888e-07	0.00301787	-0.19715	7.6177	7.6086	7.6086	7.6086	7.8271	BRD-K56957086	dacinostat
CTSB	PC3	5.78476e-13	0.00292495	4.53025e-07	4.53025e-07	0.00276695	-0.0636	3.58555	2.5556	2.5556	2.5556	4.4926	BRD-K06858286	cabazitaxel
CTSB	A549	6.09783e-13	0.00286318	2.66024e-07	2.66024e-07	0.00283029	0	2.9104	2.3366	3.1547	3.1547	3.1547	BRD-K24496482	SB-590885
CTSB	MCF7	6.10766e-13	0.00338862	3.54032e-07	3.54032e-07	0.00309584	-0.2102	2.1646	1.9415	2.0919	2.0919	2.2053	BRD-K68164687	epothilone-b
CTSB	A375	6.11005e-13	0.00291912	2.86252e-07	2.86252e-07	0.00454036	-0.1133	2.9293	3.0568	2.8571	2.8571	2.1172	BRD-K47869605	podophyllotoxin
CTSB	PC3	6.17697e-13	0.00318258	3.27552e-07	3.27552e-07	0.00299237	-0.0636	2.987	3.1384	3.0562	3.0562	2.7913	BRD-A28746609	paclitaxel
CTSB	A375	6.22721e-13	0.00360883	3.37996e-07	3.37996e-07	0.00392642	-0.1133	2.6384	1.6785	2.6366	2.6366	2.0644	BRD-K69776681	volasertib
CTSB	PC3	6.79445e-13	0.00275791	5.58982e-07	5.58982e-07	0.00275791	-0.0636	4.5294	5.8567	3.7947	3.7947	6.33	BRD-K37890730	camptothecin
CTSB	HT29	7.10006e-13	0.0031145	9.70308e-09	9.70308e-09	0.00461175	-0.19715	1.4612	1.21975	1.67325	1.67325	1.37225	BRD-K37764012	PF-03758309
CTSB	HA1E	7.93899e-13	0.00315445	3.43232e-07	3.43232e-07	0.00454532	-0.0725	2.9362	2.7899	2.8448	2.8448	2.8257	BRD-K47869605	podophyllotoxin
CTSB	A375	7.97808e-13	0.00312112	4.44243e-07	4.44243e-07	0.00311122	-0.1133	-4.357	-3.782	-3.782	-3.782	-4.3362	BRD-K82244583	binimetinib
CTSB	HT29	8.04106e-13	0.00295069	6.12907e-07	6.12907e-07	0.0028113	-0.19715	9.6243	8.981	3.7923	3.7923	15.5091	BRD-K92093830	doxorubicin
CTSB	A375	8.15397e-13	0.00308169	2.90145e-07	2.90145e-07	0.00293783	-0.1133	3.2207	3.2207	3.2207	3.2207	3.3423	BRD-K61195623	combretastatin-A-4
CTSB	A375	8.64185e-13	0.00478301	5.32528e-07	5.32528e-07	0.00324219	-0.1133	2.44525	2.1847	2.6892	2.6892	1.8697	BRD-K47642186	piclamilast
CTSB	PC3	9.35999e-13	0.0030414	7.89133e-07	7.89133e-07	0.00273093	-0.0636	5.2015	3.65	1.9	1.9	10.1882	BRD-A68009927	daunorubicin
CTSB	HT29	1.0694e-12	0.00352857	5.08722e-07	5.08722e-07	0.0037706	-0.19715	5.2382	5.3059	4.519	4.519	5.523	BRD-K78567475	dolastatin-10
CTSB	MCF7	1.14034e-12	0.00272786	2.16931e-07	2.16931e-07	0.00272786	-0.2102	8.5887	8.7482	8.7482	8.7482	8.0687	BRD-K88510285	bortezomib
CTSB	HA1E	1.15406e-12	0.00304559	3.33093e-07	3.33093e-07	0.00317462	-0.0725	2.77935	4.062	2.8762	2.8762	2.9392	BRD-K61195623	combretastatin-A-4
CTSB	A375	1.19002e-12	0.00293783	8.95273e-07	8.95273e-07	0.00286364	-0.1133	3.1374	2.8592	2.0005	2.0005	3.8358	BRD-A48430263	pioglitazone
CTSB	A375	1.22134e-12	0.00311122	3.22218e-07	3.22218e-07	0.00308169	-0.1133	-3.8967	-5.4947	-4.2007	-4.2007	-5.1536	BRD-K03390685	cobimetinib
CTSB	MCF7	1.24468e-12	0.00273594	2.33885e-07	2.33885e-07	0.0144379	-0.2102	5.6429	6.6621	6.3398	6.3398	7.51915	BRD-K15179879	carfilzomib
CTSB	HCC515	1.27906e-12	0.00287416	4.89597e-07	4.89597e-07	0.00287416	-0.4432	2.75855	2.6372	2.0788	2.0788	2.8799	BRD-K42918627	GSK-2126458
CTSB	MCF7	1.29322e-12	0.00276032	2.30651e-07	2.30651e-07	0.00279314	-0.2102	4.8255	5.3652	4.8255	4.8255	4.7912	BRD-K43586850	lacidipine
CTSB	MCF7	1.29675e-12	0.00272786	2.44528e-07	2.44528e-07	0.00272786	-0.2102	6.7691	9.7258	4.7048	4.7048	15.1108	BRD-A68009927	daunorubicin
CTSB	A375	1.42488e-12	0.00286364	2.61165e-07	2.61165e-07	0.0083025	-0.1133	2.6975	3.8512	3.5597	3.5597	1.7271	BRD-A05821830	docetaxel
CTSB	MCF7	1.42867e-12	0.00289374	2.47604e-07	2.47604e-07	0.0144822	-0.2102	3.6377	3.3693	3.5698	3.5698	4.32145	BRD-K61195623	combretastatin-A-4
CTSB	HT29	1.43249e-12	0.00341837	5.28715e-07	5.28715e-07	0.00369995	-0.19715	5.4852	5.2539	4.9593	4.9593	5.0348	BRD-K18157228	fdcyd
CTSB	HT29	1.53625e-12	0.0028113	2.70109e-07	2.70109e-07	0.0028204	-0.19715	14.2741	14.9067	10.8435	10.8435	15.0063	BRD-A66419424	ixazomib-citrate
CTSB	HA1E	1.5727e-12	0.00310453	6.66383e-07	6.66383e-07	0.00334026	-0.0725	2.2961	3.1957	2.3798	2.3798	2.269	BRD-A05821830	docetaxel
CTSB	HA1E	1.60477e-12	0.00325648	1.03605e-06	1.03605e-06	0.00317462	-0.0725	3.3787	3.6131	2.0715	2.0715	2.5841	BRD-K41783120	STA-5326
CTSB	HCC515	1.78267e-12	0.00287416	6.15108e-07	6.15108e-07	0.00325543	-0.4432	2.6632	2.6892	1.8213	1.8213	2.4898	BRD-A45498368	WYE-125132
CTSB	A549	1.80539e-12	0.148849	0.0044732	0.0044732	0.000412854	0	1.07995	0.61445	0.6745	0.6745	0.9007	BRD-K26818574	BIX-01294
CTSB	A549	1.89073e-12	0.00279774	7.45482e-07	7.45482e-07	0.00283029	0	3.8763	3.9251	3.8763	3.8763	3.9251	BRD-K12184916	NVP-BEZ235
CTSB	HA1E	1.98382e-12	0.00302617	2.95355e-07	2.95355e-07	0.00303586	-0.0725	-5.6554	-5.4202	-5.4684	-5.4684	-5.3553	BRD-A36057565	bruceantin
CTSB	A375	2.23225e-12	0.0154357	1.36954e-06	1.36954e-06	0.0030719	-0.1133	-4.7909	-5.6843	-4.8388	-4.8388	-6.5426	BRD-K64538373	Ro-4987655
CTSB	MCF7	2.39041e-12	0.00334948	5.37817e-07	5.37817e-07	0.00341825	-0.2102	1.97415	2.6857	2.3662	2.3662	2.0254	BRD-K15108141	gemcitabine
CTSB	A375	2.44399e-12	0.003712	1.47154e-06	1.47154e-06	0.00306214	-0.1133	-3.4172	-2.3225	-2.5098	-2.5098	-4.6534	BRD-K28965160	BVD-523
CTSB	HT29	2.49204e-12	0.00313629	1.42602e-06	1.42602e-06	0.00316655	-0.19715	6.9907	7.3965	7.3144	7.3144	6.8863	BRD-A44448661	pentobarbital
CTSB	A375	2.59226e-12	0.00306214	3.83041e-07	3.83041e-07	0.00304271	-0.1133	-5.0317	-5.5315	-3.9512	-3.9512	-5.3467	BRD-K85751432	refametinib
CTSB	MCF7	2.61664e-12	0.00285143	2.0092e-06	2.0092e-06	0.00283466	-0.2102	2.554	4.7657	2.3593	2.3593	4.6801	BRD-K58435339	AT-13387
CTSB	HT29	2.62033e-12	0.00304708	3.77514e-07	3.77514e-07	0.00333247	-0.19715	8.6403	8.6403	8.5615	8.5615	7.7327	BRD-A36331462	oprozomib
CTSB	HA1E	2.62884e-12	0.00363771	6.35869e-07	6.35869e-07	0.00339361	-0.0725	1.99115	2.5738	2.1555	2.1555	2.4903	BRD-K68164687	epothilone-b
CTSB	A375	2.64592e-12	0.00306214	1.50323e-06	1.50323e-06	0.00304271	-0.1133	-4.8643	-4.8643	-4.77415	-4.77415	-5.4248	BRD-K26667523	TAK-733
CTSB	PC3	2.9001e-12	0.00327647	2.18514e-06	2.18514e-06	0.00280341	-0.0636	3.0098	2.9511	2.1114	2.1114	3.9743	BRD-K00259736	colchicine
CTSB	PC3	2.91811e-12	0.0124933	1.4235e-06	1.4235e-06	0.000249875	-0.0636	-0.7928	-0.6797	-0.7679	-0.7679	-0.95935	BRD-K49328571	dasatinib
CTSB	HA1E	3.03177e-12	0.00660657	7.59958e-07	7.59958e-07	0.00348059	-0.0725	3.12055	3.715	2.9967	2.9967	3.2444	BRD-K06858286	cabazitaxel
CTSB	MCF7	3.07035e-12	0.000716075	1.89833e-06	1.89833e-06	0.00438358	-0.2102	1.19655	0.94255	0.9391	0.9391	1.19355	BRD-K36740062	GSK-1070916
CTSB	MCF7	3.08986e-12	0.00013494	0.000950375	0.000950375	7.37851e-05	-0.2102	0.7785	1.02505	0.3964	0.3964	1.4343	BRD-A19500257	geldanamycin
CTSB	HT29	3.13021e-12	0.00351741	2.31016e-06	2.31016e-06	0.00287558	-0.19715	7.24755	5.4334	2.1211	2.1211	11.4884	BRD-A68009927	daunorubicin
CTSB	HT29	3.19204e-12	0.0160787	1.71958e-06	1.71958e-06	0.00324854	-0.19715	6.0189	7.22405	6.03525	6.03525	6.6469	BRD-K47869605	podophyllotoxin
CTSB	HA1E	3.60505e-12	0.00177563	2.02158e-05	2.02158e-05	0.000845989	-0.0725	0.9774	1.18975	0.7043	0.7043	1.5121	BRD-A19500257	geldanamycin
CTSB	A549	3.64806e-12	0.00448952	2.22518e-08	1.07609e-06	0.00367852	0	-1.1464	-1.3078	-1.19455	-1.1464	-1.7342	BRD-K36363294	I-BET-151
CTSB	HT29	3.70931e-12	0.00341837	2.25575e-06	2.25575e-06	0.00316655	-0.19715	6.3128	5.6242	2.7455	2.7455	7.242	BRD-K89561498	SN-38
CTSB	MCF7	4.05508e-12	0.0047348	1.88872e-06	1.88872e-06	0.00407424	-0.2102	1.6188	1.5689	1.1835	1.1835	1.5881	BRD-K92241597	tosedostat
CTSB	PC3	4.34851e-12	0.00349421	2.90261e-06	2.90261e-06	0.00327647	-0.0636	2.2411	2.0941	1.6564	1.6564	2.3881	BRD-A45498368	WYE-125132
CTSB	HT29	4.3679e-12	0.0147444	1.61418e-06	1.61418e-06	0.00389107	-0.19715	5.1553	13.7859	5.60835	5.60835	3.8273	BRD-K73088654	floxuridine
CTSB	HA1E	4.92768e-12	0.00107924	0.000157666	0.000157666	0.00121819	-0.0725	1.58095	2.062	1.29095	1.29095	1.9469	BRD-K59317601	MLN-0128
CTSB	A375	5.15496e-12	0.00343725	1.12477e-06	1.12477e-06	0.00346441	-0.1133	1.8694	1.9946	1.9946	1.9946	1.7339	BRD-K37590257	GSK-256066
CTSB	A375	5.76999e-12	0.0145416	5.08327e-06	5.08327e-06	0.0027733	-0.1133	6.1669	6.24355	5.4172	5.4172	6.1669	BRD-K41783120	STA-5326
CTSB	HT29	5.88843e-12	0.00402761	1.92141e-06	1.92141e-06	0.00357355	-0.19715	3.54675	3.5425	2.8999	2.8999	4.2794	BRD-K37890730	camptothecin
CTSB	MCF7	6.1106e-12	0.0147958	5.2642e-06	5.2642e-06	0.00279314	-0.2102	5.858	4.97695	5.2811	5.2811	6.5786	BRD-K41438959	perampanel
CTSB	A375	6.29871e-12	0.000153613	9.69853e-10	9.69853e-10	0.00636646	-0.1133	-2.8001	-3.4207	-5.0917	-5.0917	-1.8279	BRD-K53417444	OTS-167
CTSB	HT29	6.48088e-12	0.0045899	1.14014e-06	1.14014e-06	0.00467579	-0.19715	2.935	3.0026	3.0026	3.0026	2.5715	BRD-A74914197	pralatrexate
CTSB	HA1E	6.54215e-12	0.00283808	2.37574e-07	2.37574e-07	0.0147917	-0.0725	6.247	6.3522	6.7031	6.7031	5.65965	BRD-A66419424	ixazomib-citrate
CTSB	MCF7	6.79771e-12	0.00095321	0.000299601	0.000299601	0.0017089	-0.2102	2.6188	2.8776	2.1501	2.1501	3.1254	BRD-K68174511	torin-2
CTSB	A375	7.25287e-12	0.003151	3.43077e-07	3.43077e-07	0.00780055	-0.1133	-3.5523	-4.9823	-3.5523	-3.5523	-3.1688	BRD-K89014967	AS-703026
CTSB	A549	7.38534e-12	0.00435476	6.47394e-07	6.47394e-07	0.00368098	0	-1.9125	-2.2861	-2.2861	-2.2861	-1.9214	BRD-K41895714	AS-605240
CTSB	A375	7.49789e-12	0.00301377	2.86031e-06	2.86031e-06	0.00362017	-0.1133	2.1339	2.5278	2.1339	2.1339	2.053	BRD-K43887077	dopamine
CTSB	A375	8.34161e-12	0.00291912	3.18863e-07	3.18863e-07	0.00285448	-0.1133	3.6396	2.6776	2.6776	2.6776	3.6639	BRD-K09426783	TAS-103
CTSB	HT29	8.59968e-12	0.000119687	2.71285e-06	2.71285e-06	0.000209048	-0.19715	1.1432	2.1277	0.79325	0.79325	2.1148	BRD-K51313569	palbociclib
CTSB	HA1E	8.73872e-12	0.00298766	6.68336e-07	6.68336e-07	0.020643	-0.0725	2.5581	3.6508	3.5376	3.5376	1.917	BRD-K51967704	BIIB-021
CTSB	HA1E	9.11175e-12	0.000202247	0.00249605	0.00249605	0.000173423	-0.0725	1.84165	1.81855	0.52495	0.52495	2.4151	BRD-K13390322	AT-7519
CTSB	A375	9.58353e-12	0.0768687	1.02438e-05	1.02438e-05	0.0327813	-0.1133	0.7679	0.2793	0.45375	0.45375	0.44115	BRD-K64890080	BI-2536
CTSB	HT29	9.70704e-12	0.00520645	2.89999e-06	2.89999e-06	0.00488188	-0.19715	2.75455	2.6282	2.0235	2.0235	3.0239	BRD-K69776681	volasertib
CTSB	A549	1.10923e-11	0.00376497	4.79396e-07	4.79396e-07	0.00405013	0	-2.00045	-1.7677	-2.548	-2.548	-1.7352	BRD-K05104363	PD-184352
CTSB	PC3	1.24484e-11	0.00275791	2.28089e-07	2.28089e-07	0.0145015	-0.0636	5.43605	6.612	6.0893	6.0893	6.36955	BRD-A66419424	ixazomib-citrate
CTSB	A375	1.28337e-11	0.00276441	4.17734e-06	4.17734e-06	0.00275555	-0.1133	5.8387	7.0059	4.7032	4.7032	7.2251	BRD-A36331462	oprozomib
CTSB	MCF7	1.30944e-11	0.00027204	0.00103534	0.00103534	0.000349962	-0.2102	0.80705	1.0498	0.4726	0.4726	0.9212	BRD-K68065987	MK-2206
CTSB	HT29	1.40286e-11	0.00428707	5.7476e-06	5.7476e-06	0.00410391	-0.19715	3.7545	3.6089	2.88055	2.88055	3.8387	BRD-K78055238	LY-2090314
CTSB	A375	1.43057e-11	0.000587007	0.0013963	0.0013963	0.000192725	-0.1133	1.15805	1.0876	0.4938	0.4938	1.70885	BRD-K85606544	neratinib
CTSB	HA1E	1.52713e-11	0.000634433	4.3297e-05	4.3297e-05	0.00424462	-0.0725	1.40665	1.14075	0.7356	0.7356	1.202	BRD-K12184916	NVP-BEZ235
CTSB	A375	1.64113e-11	0.00298509	2.55405e-06	2.55405e-06	0.00295665	-0.1133	2.7043	3.0719	2.3483	2.3483	2.8446	BRD-K42918627	GSK-2126458
CTSB	MCF7	1.67657e-11	0.000489168	0.00316089	0.00316089	0.000956467	-0.2102	1.13965	1.1685	0.24765	0.24765	0.93845	BRD-K12787259	CX-5461
CTSB	HCC515	1.71791e-11	0.00423193	4.36494e-07	4.36494e-07	0.00314205	-0.4432	2.13905	1.7607	2.6191	2.6191	1.6559	BRD-K12184916	NVP-BEZ235
CTSB	A549	1.81305e-11	0.00306795	9.54239e-06	9.54239e-06	0.00283029	0	2.3184	1.8911	1.8226	1.8226	2.6722	BRD-A45498368	WYE-125132
CTSB	MCF7	1.82217e-11	0.00332039	4.86078e-06	4.86078e-06	0.00461621	-0.2102	1.56455	1.9413	1.5456	1.5456	1.6951	BRD-K19388745	colforsin-daproate
CTSB	A375	1.82376e-11	0.00517687	2.80564e-06	2.80564e-06	0.00318113	-0.1133	1.89135	1.3707	1.8351	1.8351	2.2731	BRD-K68164687	epothilone-b
CTSB	MCF7	1.88609e-11	0.000752654	4.3846e-05	4.3846e-05	0.0790421	-0.2102	0.914	0.9654	0.8692	0.8692	0.7494	BRD-K69932463	AZD-8055
CTSB	A375	1.90531e-11	0.00458235	5.30474e-06	5.30474e-06	0.00329389	-0.1133	-2.05305	-1.8231	-1.7919	-1.7919	-3.4428	BRD-A94756469	digoxin
CTSB	MCF7	1.91964e-11	0.00712587	2.27829e-05	2.27829e-05	0.00780209	-0.2102	-1.4165	-1.4892	-1.38445	-1.38445	-1.4265	BRD-K99252563	QL-XII-47
CTSB	MCF7	1.96261e-11	0.00272786	1.54381e-05	1.54381e-05	0.00272786	-0.2102	7.7123	8.6047	7.0871	7.0871	8.9026	BRD-K78659596	ixazomib
CTSB	MCF7	2.06899e-11	0.00442452	1.43141e-05	1.43141e-05	0.00287674	-0.2102	2.29155	1.8659	0.8791	0.8791	3.3335	BRD-K34022604	clofarabine
CTSB	A549	2.10703e-11	0.00289641	1.11338e-05	1.11338e-05	0.00279774	0	3.0935	2.6722	1.9751	1.9751	3.6089	BRD-K42918627	GSK-2126458
CTSB	PC3	2.16471e-11	0.00376083	1.90313e-06	1.90313e-06	0.00480844	-0.0636	2.4417	2.3053	3.284	3.284	2.5027	BRD-K59325863	delanzomib
CTSB	A375	2.21381e-11	0.0155622	1.28231e-05	1.28231e-05	0.00347533	-0.1133	1.9114	1.2692	1.2228	1.2228	1.7609	BRD-K92303087	oglemilast
CTSB	HT29	2.32867e-11	0.0102964	4.6797e-06	4.6797e-06	0.00550003	-0.19715	2.68525	1.3732	2.3	2.3	2.4931	BRD-K60997853	PHA-848125
CTSB	A375	2.3859e-11	0.00294723	1.42339e-05	1.42339e-05	0.00319124	-0.1133	2.38335	2.8818	2.1043	2.1043	2.1011	BRD-K23363278	CYT-997
CTSB	HT29	2.49693e-11	0.00463194	0.00574462	0.00574462	0.000236545	-0.19715	1.6899	1.68655	0.37145	0.37145	1.9487	BRD-K33379087	tivantinib
CTSB	MCF7	2.87306e-11	0.00290227	2.51416e-07	2.51416e-07	0.00281798	-0.2102	4.0042	3.1916	3.3504	3.3504	4.5622	BRD-K29415052	BGT-226
CTSB	A375	2.92655e-11	0.0029098	2.55715e-07	2.55715e-07	0.00281814	-0.1133	3.8432	3.5431	3.6188	3.6188	4.4638	BRD-K99475619	genz-644282
CTSB	MCF7	2.9704e-11	0.00301527	2.13481e-05	2.13481e-05	0.00272786	-0.2102	3.1428	2.6507	1.3094	1.3094	6.757	BRD-K12867552	PCI-24781
CTSB	MCF7	3.11442e-11	0.00499427	3.95716e-06	3.95716e-06	0.00720061	-0.2102	1.23075	1.8665	0.9826	0.9826	1.0279	BRD-K00259736	colchicine
CTSB	A375	3.25436e-11	0.00278222	2.57261e-07	2.57261e-07	0.00283626	-0.1133	3.37885	6.4254	6.012	6.012	4.4413	BRD-K56844688	epirubicin
CTSB	HA1E	3.28422e-11	0.00402132	1.03794e-05	1.03794e-05	0.00350265	-0.0725	-3.4757	-2.6025	-4.3323	-4.3323	-3.4466	BRD-K12343256	trametinib
CTSB	MCF7	3.31142e-11	0.0150694	1.23361e-06	1.23361e-06	0.0151154	-0.2102	-6.9277	-7.32805	-6.7899	-6.7899	-6.87125	BRD-A36057565	bruceantin
CTSB	HA1E	3.40046e-11	0.00469465	1.3746e-05	1.3746e-05	0.00389767	-0.0725	2.0241	1.7434	1.5155	1.5155	2.0711	BRD-A03506276	XL-888
CTSB	A375	4.01604e-11	0.00609903	1.02034e-05	1.02034e-05	0.0081007	-0.1133	1.621	1.2954	1.2954	1.2954	1.1495	BRD-A03216249	mepivacaine
CTSB	MCF7	4.15782e-11	0.00245949	0.0065675	0.0065675	6.75375e-05	-0.2102	1.0676	0.69245	0.2844	0.2844	1.472	BRD-K54997624	alpelisib
CTSB	HT29	4.17058e-11	0.00310629	3.01216e-07	3.01216e-07	0.0158142	-0.19715	8.193	8.193	8.4182	8.4182	8.1181	BRD-A36057565	bruceantin
CTSB	A375	4.92372e-11	0.00993028	0.00591304	0.00591304	8.95095e-05	-0.1133	1.48975	1.0145	0.393	0.393	2.1671	BRD-K08799216	pelitinib
CTSB	A549	5.21914e-11	7.80806e-08	4.58508e-09	4.58508e-09	1.07363e-06	0	-0.51975	-0.9443	-0.52785	-0.52785	-0.814	BRD-K02708799	GSK-1059615
CTSB	MCF7	5.29754e-11	0.00307777	3.54007e-05	3.54007e-05	0.00288523	-0.2102	2.89375	2.2763	2.2201	2.2201	3.2546	BRD-K41783120	STA-5326
CTSB	HA1E	5.43774e-11	0.00109526	0.000945488	0.000945488	0.000314346	-0.0725	1.0916	1.01695	0.55475	0.55475	1.389	BRD-K85606544	neratinib
CTSB	A375	5.58949e-11	0.013811	1.33067e-06	1.33067e-06	0.00304271	-0.1133	2.3691	1.9012	2.3691	2.3691	2.298	BRD-K06858286	cabazitaxel
CTSB	HCC515	5.7314e-11	0.00701886	7.23185e-07	7.23185e-07	0.0163928	-0.4432	1.38965	0.8652	2.0961	2.0961	0.7274	BRD-K24496482	SB-590885
CTSB	MCF7	7.02542e-11	0.00272786	2.16931e-07	2.16931e-07	0.00272786	-0.2102	7.31275	7.7566	7.5729	7.5729	7.0402	BRD-K93779381	ingenol-mebutate
CTSB	A549	7.07312e-11	0.00538846	0.000378405	0.000378405	0.00118654	0	1.1392	1.2658	0.8267	0.8267	1.2559	BRD-K12040459	AT7867
CTSB	HCC515	7.08779e-11	0.00743357	1.75114e-05	1.75114e-05	0.00430564	-0.4432	1.3397	0.8123	0.8123	0.8123	1.206	BRD-K00337317	NU-7441
CTSB	A375	7.21813e-11	0.000213569	0.000644557	0.000644557	0.000346546	-0.1133	1.2113	1.22415	1.0068	1.0068	1.3559	BRD-K64800655	PHA-793887
CTSB	A375	7.23072e-11	0.005336	1.76685e-05	1.76685e-05	0.00631157	-0.1133	1.4385	1.3132	1.3132	1.3132	1.2582	BRD-K68938568	GDC-0152
CTSB	HCC515	7.90793e-11	0.00812978	4.28021e-06	4.28021e-06	0.00374722	-0.4432	1.1925	1.179	1.179	1.179	1.5498	BRD-K81528515	nilotinib
CTSB	A375	8.01887e-11	0.0193527	2.06765e-05	2.06765e-05	0.00697949	-0.1133	1.3889	0.9388	0.9388	0.9388	1.334	BRD-K09078998	deforolimus
CTSB	MCF7	8.0556e-11	0.00272786	2.3001e-07	2.3001e-07	0.00272786	-0.2102	9.25585	11.1419	6.8957	6.8957	10.8486	BRD-K56844688	epirubicin
CTSB	A549	8.08879e-11	0.0734272	0.000573196	0.000573196	0.00890969	0	-0.81985	-0.4668	-0.47285	-0.47285	-0.88955	BRD-K50387473	XMD-892
CTSB	HA1E	8.2359e-11	0.00412279	1.04504e-06	1.04504e-06	0.00416144	-0.0725	1.67315	2.6484	2.1268	2.1268	2.1374	BRD-K83699324	NMS-1286937
CTSB	MCF7	8.90208e-11	0.00274405	2.57775e-07	2.57775e-07	0.00273594	-0.2102	4.7949	5.1379	4.5277	4.5277	6.5345	BRD-K23499943	alvespimycin
CTSB	MCF7	8.94553e-11	0.273045	5.14918e-05	5.14918e-05	0.00300644	-0.2102	2.7439	2.6126	2.7203	2.7203	2.7439	BRD-K78567475	dolastatin-10
CTSB	HT29	8.97891e-11	0.00822262	3.56844e-06	3.56844e-06	0.00964114	-0.19715	2.0388	1.5311	2.0843	2.0843	1.3567	BRD-K68164687	epothilone-b
CTSB	A549	9.45883e-11	0.00344463	0.000449261	0.000449261	0.000198842	0	1.5296	1.6488	1.2388	1.2388	1.707	BRD-K76694128	rebastinib
CTSB	HT29	9.79305e-11	0.000662967	4.63946e-05	4.63946e-05	0.0360499	-0.19715	1.42275	2.0626	0.7687	0.7687	1.15395	BRD-K53417444	OTS-167
CTSB	HCC515	1.0348e-10	0.00368226	3.75808e-05	3.75808e-05	0.00287416	-0.4432	1.8824	1.6373	0.4908	0.4908	2.3055	BRD-K44100512	KIN001-043
CTSB	A375	1.08216e-10	0.00388992	4.7267e-07	4.7267e-07	0.00806555	-0.1133	-2.41265	-2.3041	-2.7674	-2.7674	-1.4677	BRD-K17203476	LY-2874455
CTSB	A375	1.12572e-10	0.00439611	7.91998e-06	7.91998e-06	0.0149647	-0.1133	1.51215	1.6129	1.5753	1.5753	0.9853	BRD-K07609981	dexloxiglumide
CTSB	HCC515	1.14516e-10	0.00510931	5.24039e-06	5.24039e-06	0.00725322	-0.4432	1.8003	1.998	1.998	1.998	1.5331	BRD-K93123848	RAF-265
CTSB	A375	1.25701e-10	0.0027733	2.30767e-07	2.30767e-07	0.00282719	-0.1133	4.9019	5.7237	6.6262	6.6262	4.523	BRD-A66419424	ixazomib-citrate
CTSB	MCF7	1.2676e-10	0.00306877	2.51067e-07	2.51067e-07	0.0148865	-0.2102	4.5058	4.2195	4.9267	4.9267	3.6479	BRD-K61397605	romidepsin
CTSB	HT29	1.30573e-10	0.0147939	5.43214e-06	5.43214e-06	0.00283869	-0.19715	12.8422	12.9827	11.7534	11.7534	13.6755	BRD-K59325863	delanzomib
CTSB	A375	1.35523e-10	7.1657e-05	0.0138248	0.0138248	2.67022e-05	-0.1133	1.5309	1.54245	0.60475	0.60475	3.0736	BRD-A39996500	radicicol
CTSB	HA1E	1.36848e-10	0.0341236	9.56617e-06	9.56617e-06	0.00311446	-0.0725	2.5356	2.3948	2.3948	2.3948	3.1213	BRD-K78567475	dolastatin-10
CTSB	A375	1.36876e-10	0.00496129	1.32313e-06	1.32313e-06	0.0154369	-0.1133	1.42765	1.3815	1.6449	1.6449	1.4738	BRD-K81672972	dinoprost
CTSB	A375	1.44229e-10	0.00977591	1.86166e-06	1.86166e-06	0.0148235	-0.1133	1.3269	1.404	1.4163	1.4163	0.7619	BRD-K00259736	colchicine
CTSB	MCF7	1.45872e-10	0.00304191	3.46342e-07	3.46342e-07	0.32501	-0.2102	2.3777	2.4629	2.3217	2.3217	1.5049	BRD-K68532323	SB-743921
CTSB	MCF7	1.49785e-10	0.00306877	3.84365e-07	3.84365e-07	0.0029194	-0.2102	2.51965	2.0859	2.0859	2.0859	3.2383	BRD-K47869605	podophyllotoxin
CTSB	MCF7	1.54844e-10	0.00270339	8.30718e-05	1.54547e-05	0.00262524	-0.2102	1.641	1.01885	1.1256	0.93905	1.01885	BRD-K54606188	JQ1-(+)
CTSB	MCF7	1.62532e-10	0.00302413	2.60722e-05	2.60722e-05	0.0151154	-0.2102	3.194	3.194	1.0291	1.0291	4.40125	BRD-K07310275	PF-04691502
CTSB	HT29	1.70338e-10	0.00316655	3.39836e-07	3.39836e-07	0.333595	-0.19715	6.2191	6.8863	6.8278	6.8278	5.9839	BRD-K41438959	perampanel
CTSB	A549	1.94293e-10	0.0271894	4.9666e-06	4.9666e-06	0.0100989	0	-0.8782	-0.6745	-0.8782	-0.8782	-0.7956	BRD-K49055432	A-66
CTSB	A375	2.00791e-10	0.00293783	0.000116433	0.000116433	0.0029098	-0.1133	3.11905	2.5545	1.9271	1.9271	3.2117	BRD-K19388745	colforsin-daproate
CTSB	HT29	2.03577e-10	0.00363051	9.95668e-05	9.95668e-05	0.00331131	-0.19715	5.68195	4.6343	2.3131	2.3131	6.6555	BRD-K56844688	epirubicin
CTSB	A375	2.1147e-10	0.00295665	0.000126204	0.000126204	0.00281814	-0.1133	3.50465	2.791	0.9989	0.9989	5.1491	BRD-K15507868	tesaglitazar
CTSB	A375	2.15632e-10	0.00447802	9.65919e-05	9.65919e-05	0.0029661	-0.1133	1.85065	1.959	0.7406	0.7406	3.0079	BRD-K92428153	mycophenolate-mofetil
CTSB	HCC515	2.21608e-10	0.00292601	3.41542e-05	3.41542e-05	0.00799901	-0.4432	2.09305	2.1217	1.2722	1.2722	1.792	BRD-K59317601	MLN-0128
CTSB	HCC515	2.24436e-10	0.00297871	5.9747e-05	5.9747e-05	0.00349346	-0.4432	1.88395	1.6988	1.608	1.608	1.7624	BRD-A90451247	KU-60019
CTSB	A375	2.29755e-10	0.00813599	0.000108627	0.000108627	0.00318113	-0.1133	-2.60705	-1.586	-1.1538	-1.1538	-3.6659	BRD-K43410529	MLN-2480
CTSB	A375	2.36966e-10	0.0027733	2.3007e-07	2.3007e-07	0.0027733	-0.1133	5.375	7.5369	6.4748	6.4748	6.1941	BRD-K92093830	doxorubicin
CTSB	A375	2.38792e-10	0.00276441	8.71934e-06	8.71934e-06	0.00279116	-0.1133	5.42795	7.3911	6.9094	6.9094	5.7669	BRD-K78659596	ixazomib
CTSB	A549	2.52522e-10	0.000123337	8.0256e-09	8.0256e-09	0.000121971	0	2.04085	3.0991	2.0354	2.0354	2.6655	BRD-K29415052	BGT-226
CTSB	A549	2.58428e-10	0.879116	0.000411033	0.000411033	0.000973292	0	-1.0238	-0.0887	-0.569	-0.569	-1.3315	BRD-K32536677	AGK-2
CTSB	A375	2.6984e-10	0.0136867	0.0114535	0.0114535	0.00010123	-0.1133	0.9495	1.06125	0.55345	0.55345	1.53495	BRD-K70511574	HMN-214
CTSB	PC3	2.90458e-10	0.0343495	2.45456e-05	2.45456e-05	0.00422209	-0.0636	1.7331	2.9145	2.201	2.201	1.7331	BRD-A03506276	XL-888
CTSB	HCC515	2.96464e-10	0.00774311	2.11774e-05	2.11774e-05	0.00555998	-0.4432	0.8092	0.7378	0.7378	0.7378	0.9841	BRD-K23984367	sorafenib
CTSB	MCF7	2.9893e-10	0.0160903	2.56262e-05	2.56262e-05	0.00478839	-0.2102	1.2431	0.7223	1.1286	1.1286	1.5985	BRD-K75295174	alisertib
CTSB	A375	3.08657e-10	0.0227028	4.84809e-05	4.84809e-05	0.0124239	-0.1133	1.37395	1.0024	1.0024	1.0024	1.3365	BRD-K28456624	seocalcitol
CTSB	HEPG2	3.34719e-10	0.00301001	2.56096e-05	2.56096e-05	0.0647118	-0.2475	0.36985	0.4183	0.2561	0.2561	0.1315	BRD-K49328571	dasatinib
CTSB	HA1E	3.46419e-10	0.00696874	6.73953e-05	6.73953e-05	0.00438672	-0.0725	-2.2432	-1.9571	-1.8767	-1.8767	-2.4331	BRD-K26667523	TAK-733
CTSB	HT29	3.60132e-10	0.00302758	4.93169e-05	4.93169e-05	0.00435426	-0.19715	2.8074	11.4044	3.5748	3.5748	4.493	BRD-K51967704	BIIB-021
CTSB	PC3	3.65403e-10	0.0382263	0.000135938	0.000135938	0.0109757	-0.0636	1.51405	1.10975	1.13045	1.13045	1.38315	BRD-K12184916	NVP-BEZ235
CTSB	MCF7	3.69095e-10	0.00272786	2.3194e-07	2.3194e-07	0.317091	-0.2102	5.5782	8.9535	4.4897	4.4897	13.2812	BRD-K92093830	doxorubicin
CTSB	A375	4.06485e-10	0.00326278	2.78252e-06	2.78252e-06	0.00378226	-0.1133	-2.262	-3.2905	-3.0503	-3.0503	-2.4151	BRD-K25630527	LY-2784544
CTSB	HT29	4.13372e-10	0.00856476	1.25784e-05	1.25784e-05	0.0116284	-0.19715	1.78685	1.8907	1.866	1.866	1.3617	BRD-A03506276	XL-888
CTSB	MCF7	4.45708e-10	0.00424007	6.02522e-05	6.02522e-05	0.00342818	-0.2102	1.7734	1.7456	1.5878	1.5878	1.8012	BRD-K92441787	bexarotene
CTSB	A375	4.57057e-10	0.00415847	0.000229572	0.000229572	0.00305241	-0.1133	2.16915	1.6337	1.0968	1.0968	2.2097	BRD-K07881437	danusertib
CTSB	A375	4.64682e-10	0.0193781	4.84223e-05	4.84223e-05	0.00368885	-0.1133	1.41165	0.8965	0.8965	0.8965	1.779	BRD-K75295174	alisertib
CTSB	PC3	5.49796e-10	0.00537572	8.24855e-07	8.24855e-07	0.00463174	-0.0636	1.90285	1.6385	1.7282	1.7282	1.9027	BRD-K65182930	NVP-AUY922
CTSB	HT29	5.81282e-10	0.0500858	1.69124e-05	1.69124e-05	0.00674874	-0.19715	2.0025	1.85155	1.9531	1.9531	2.3471	BRD-A28746609	paclitaxel
CTSB	HA1E	5.89674e-10	0.0147425	1.1239e-06	1.1239e-06	0.0147917	-0.0725	6.2754	6.9949	6.4954	6.4954	6.7661	BRD-K78659596	ixazomib
CTSB	A375	6.1954e-10	1.43047e-06	6.10787e-10	6.10787e-10	5.60975e-05	-0.1133	1.0299	3.0543	1.5351	1.5351	4.4242	BRD-K21680192	mitoxantrone
CTSB	A375	7.04779e-10	0.0164318	1.32891e-06	1.32891e-06	0.00290052	-0.1133	-6.9522	-4.5532	-6.77315	-6.77315	-7.9072	BRD-K61397605	romidepsin
CTSB	HEPG2	7.14784e-10	0.00287091	2.09701e-05	2.09701e-05	0.00287091	-0.2475	2.0195	2.7353	1.6681	1.6681	2.0407	BRD-K54256913	MK-1775
CTSB	HT29	7.86599e-10	0.0102964	3.78741e-05	3.78741e-05	0.00449151	-0.19715	1.7701	1.7131	1.8062	1.8062	5.028	BRD-K26341917	L-ergothioneine
CTSB	HT29	8.71086e-10	0.000165108	0.0230217	0.0230217	0.000680118	-0.19715	1.66455	1.92015	0.58635	0.58635	2.37085	BRD-K64800655	PHA-793887
CTSB	HA1E	9.04621e-10	0.00573073	0.000175704	0.000175704	0.0047091	-0.0725	1.8876	2.5826	1.8784	1.8784	1.8029	BRD-K23499943	alvespimycin
CTSB	MCF7	9.13226e-10	0.00379814	0.000372949	0.000372949	0.00321569	-0.2102	2.6007	2.6007	1.6538	1.6538	2.6007	BRD-K23363278	CYT-997
CTSB	PC3	9.2249e-10	0.0230643	2.71695e-06	2.71695e-06	0.0407583	-0.0636	2.2762	0.9871	2.3112	2.3112	0.684	BRD-K61195623	combretastatin-A-4
CTSB	A549	1.01479e-09	0.00313912	0.000306133	0.000306133	0.00317527	0	-2.7229	-3.1967	-1.5284	-1.5284	-2.7229	BRD-K37687095	AZD-8330
CTSB	A375	1.01563e-09	0.0029098	0.000138165	0.000138165	0.00284536	-0.1133	3.5174	3.5174	2.0068	2.0068	4.7926	BRD-K21361524	selinexor
CTSB	MCF7	1.02933e-09	0.00656594	4.86511e-05	4.86511e-05	0.0210701	-0.2102	1.12175	1.1306	1.0725	1.0725	0.6911	BRD-K70463136	BAY-87-2243
CTSB	A375	1.05246e-09	0.00503733	2.53995e-06	2.53995e-06	0.0188261	-0.1133	1.173	2.554	1.2671	1.2671	1.5133	BRD-A51964809	halofantrine
CTSB	HA1E	1.0631e-09	0.00281987	1.00293e-05	1.00293e-05	0.0554466	-0.0725	-8.8584	-8.8584	-4.8333	-4.8333	-15.821	BRD-A94756469	digoxin
CTSB	A549	1.12e-09	0.00119224	9.71056e-09	9.71056e-09	0.00169188	0	-1.0479	-1.4077	-1.2897	-1.2897	-1.3854	BRD-A35869383	ibrutinib
CTSB	HA1E	1.12918e-09	6.13411e-05	1.83291e-08	1.83291e-08	0.000127652	-0.0725	1.32845	1.93595	1.5486	1.5486	1.83665	BRD-K86797399	SB-939
CTSB	HA1E	1.15739e-09	0.00758985	0.000106902	0.000106902	0.00460878	-0.0725	2.2112	1.997	1.8948	1.8948	3.3628	BRD-K21361524	selinexor
CTSB	A375	1.18464e-09	0.00344267	7.56205e-06	7.56205e-06	0.0035304	-0.1133	-2.2892	-2.6549	-2.1343	-2.1343	-2.59	BRD-K23228615	GDC-0980
CTSB	MCF7	1.2013e-09	0.118864	0.00271528	0.00271528	0.002483	-0.2102	0.6801	0.05415	0.1585	0.1585	0.9967	BRD-U64521890	XMD-16144
CTSB	A375	1.21527e-09	0.0660695	0.00065731	0.00065731	0.00302339	-0.1133	2.2636	1.03535	0.76855	0.76855	2.2993	BRD-A63236097	andrographolide
CTSB	MCF7	1.2783e-09	0.00173949	0.00241862	0.00241862	8.47978e-05	-0.2102	0.5615	0.5415	0.3092	0.3092	1.9209	BRD-K40175214	torin-1
CTSB	HT29	1.32439e-09	0.00551677	3.08916e-05	3.08916e-05	0.00645323	-0.19715	2.17795	2.3965	2.0972	2.0972	2.304	BRD-K67844266	pevonedistat
CTSB	A549	1.33157e-09	0.010629	5.59758e-06	5.59758e-06	0.00996011	0	-0.7608	-0.6745	-0.7608	-0.7608	-0.9821	BRD-K51575138	TPCA-1
CTSB	PC3	1.3384e-09	0.0382685	0.000143667	0.000143667	0.0120476	-0.0636	1.8039	2.0402	1.615	1.615	2.0467	BRD-A24560335	efatutazone
CTSB	HCC515	1.41343e-09	0.00565431	0.000402883	0.000402883	0.00287416	-0.4432	1.81985	1.0076	0.7796	0.7796	2.6136	BRD-K85606544	neratinib
CTSB	HT29	1.49652e-09	0.0168959	4.66936e-05	4.66936e-05	0.0176333	-0.19715	5.2661	5.45635	5.1958	5.1958	4.64465	BRD-K23499943	alvespimycin
CTSB	HT29	1.52228e-09	0.180178	0.00898834	0.00898834	0.00133704	-0.19715	0.9176	0.342	0.52955	0.52955	1.1023	BRD-K72414522	AZD-5438
CTSB	HT29	1.56198e-09	0.0174607	0.000134082	0.000134082	0.0028204	-0.19715	8.4879	4.9711	2.59945	2.59945	12.6013	BRD-K22848513	bardoxolone-methyl
CTSB	MCF7	1.6164e-09	0.00395942	0.000626432	0.000626432	0.0030598	-0.2102	2.1394	2.2114	0.728	0.728	2.4683	BRD-K92428153	mycophenolate-mofetil
CTSB	MCF7	1.6485e-09	0.00272786	5.81628e-05	5.81628e-05	0.0143937	-0.2102	6.04825	6.1585	4.5405	4.5405	7.33535	BRD-K51967704	BIIB-021
CTSB	HT29	1.65876e-09	0.072473	0.0132324	0.0132324	0.00200688	-0.19715	1.3533	0.55005	0.9756	0.9756	0.93225	BRD-K12184916	NVP-BEZ235
CTSB	MCF7	1.68463e-09	0.315349	0.00110487	0.00110487	0.00280968	-0.2102	5.50845	5.2811	5.2811	5.2811	5.2811	BRD-A44448661	pentobarbital
CTSB	MCF7	1.77804e-09	0.00868343	0.00016951	0.00016951	0.00718119	-0.2102	1.66325	1.5728	1.6499	1.6499	2.1697	BRD-A74914197	pralatrexate
CTSB	PC3	1.83129e-09	0.0241411	0.000440527	0.000440527	0.00326591	-0.0636	2.4909	2.7913	1.3916	1.3916	2.583	BRD-K29968218	KX2-391
CTSB	A375	1.99512e-09	0.0201535	1.56511e-05	1.56511e-05	0.0244501	-0.1133	1.03345	0.9139	1.153	1.153	0.7937	BRD-K50398167	meclofenamic-acid
CTSB	A375	1.99512e-09	0.00580533	5.56276e-05	5.56276e-05	0.018678	-0.1133	1.0581	1.6073	0.9001	0.9001	0.8246	BRD-K86301799	dipyridamole
CTSB	HT29	2.1162e-09	0.0197927	2.17527e-06	2.17527e-06	0.102886	-0.19715	4.7077	5.7733	6.6267	6.6267	3.1649	BRD-K81258678	triptolide
CTSB	A375	2.23046e-09	0.00615384	0.000502309	0.000502309	0.00410091	-0.1133	1.5489	2.0263	0.6836	0.6836	2.1776	BRD-K99257182	quinine
CTSB	A375	2.37685e-09	0.0317475	7.43281e-05	7.43281e-05	0.0157731	-0.1133	1.244	0.8671	1.2229	1.2229	0.7986	BRD-K50590187	capsaicin
CTSB	HT29	2.46253e-09	0.00846573	1.83521e-05	1.83521e-05	0.0123329	-0.19715	1.89165	1.8352	1.9519	1.9519	1.2005	BRD-K06858286	cabazitaxel
CTSB	PC3	2.47566e-09	0.0145349	6.21797e-05	6.21797e-05	0.000679008	-0.0636	-0.7534	-0.413	-0.68595	-0.68595	-1.7219	BRD-K02708799	GSK-1059615
CTSB	A375	2.50189e-09	0.257904	0.000582982	0.000582982	0.00618142	-0.1133	1.3361	0.1616	0.7403	0.7403	1.6816	BRD-K02389548	RG-2833
CTSB	HA1E	2.55095e-09	0.00277481	8.56592e-05	8.56592e-05	0.00274809	-0.0725	8.9176	9.3624	2.376	2.376	16.5377	BRD-K92093830	doxorubicin
CTSB	A549	2.68447e-09	0.0794595	0.0142436	0.912524	0.00033968	0	-1.4336	-0.7122	0.4423	0.0644	-1.20165	BRD-K81418486	vorinostat
CTSB	HA1E	2.70852e-09	0.00300686	1.76625e-05	1.76625e-05	0.00273041	-0.0725	3.13505	3.7979	1.612	1.612	16.1063	BRD-A68009927	daunorubicin
CTSB	HT29	2.71557e-09	0.00316655	1.4174e-06	1.4174e-06	0.00314634	-0.19715	7.1676	6.5321	7.2623	7.2623	6.8705	BRD-K43586850	lacidipine
CTSB	MCF7	2.74296e-09	0.00180234	0.0131429	0.0131429	0.00256553	-0.2102	0.4294	1.1162	0.1083	0.1083	0.9028	BRD-A39996500	radicicol
CTSB	HT29	2.90137e-09	0.00693183	2.9643e-05	2.9643e-05	0.00535142	-0.19715	1.8316	1.8316	1.8011	1.8011	4.2578	BRD-K89014967	AS-703026
CTSB	HEPG2	3.06287e-09	0.00548754	0.000386547	0.000386547	0.0040569	-0.2475	1.1796	0.9491	0.7654	0.7654	1.4101	BRD-K70642949	GSK-2334470
CTSB	PC3	3.10776e-09	0.00839674	9.44857e-05	9.44857e-05	0.0356825	-0.0636	1.8146	1.2902	1.8146	1.8146	1.50955	BRD-K23363278	CYT-997
CTSB	A375	3.1983e-09	0.00334634	0.00128347	0.00128347	0.00289126	-0.1133	2.9159	1.7866	0.5772	0.5772	3.452	BRD-K72951360	valrubicin
CTSB	HT29	3.4447e-09	0.0392305	0.000525818	0.000525818	0.00766445	-0.19715	2.1793	0.6548	0.8121	0.8121	2.1152	BRD-U64521890	XMD-16144
CTSB	A375	3.494e-09	0.00690791	1.80004e-06	1.80004e-06	0.205476	-0.1133	1.4031	1.1345	1.3628	1.3628	0.5605	BRD-K53508936	CTS-1027
CTSB	A375	3.57951e-09	0.00339955	0.0013103	0.0013103	0.0029098	-0.1133	2.54275	2.2097	0.7238	0.7238	2.8554	BRD-K09602097	forskolin
CTSB	HT29	3.63449e-09	0.00703547	0.00022477	0.00022477	0.00874056	-0.19715	1.9112	2.44	1.41	1.41	1.6046	BRD-K41783120	STA-5326
CTSB	MCF7	3.69101e-09	0.00312313	2.7474e-07	2.7474e-07	0.0846649	-0.2102	2.86495	2.5086	3.3003	3.3003	3.6464	BRD-K81258678	triptolide
CTSB	HA1E	3.8836e-09	0.0149404	1.69519e-06	1.69519e-06	0.00292136	-0.0725	3.6221	6.36605	4.11345	4.11345	4.5573	BRD-A36331462	oprozomib
CTSB	A375	4.05802e-09	0.00496129	0.00154414	0.00154414	0.00284536	-0.1133	3.6178	2.1436	1.2303	1.2303	3.6711	BRD-A13084692	troglitazone
CTSB	MCF7	4.18594e-09	0.0085691	4.30812e-06	4.30812e-06	0.0104877	-0.2102	0.8787	1.1885	1.1885	1.1885	0.7766	BRD-A05821830	docetaxel
CTSB	A375	4.2785e-09	0.0339302	0.0672806	0.0672806	7.50638e-05	-0.1133	-1.0961	-0.7226	-0.3301	-0.3301	-2.311	BRD-K93123848	RAF-265
CTSB	A375	4.28521e-09	0.00402528	4.58244e-07	4.58244e-07	0.00306214	-0.1133	1.9296	1.5558	1.7279	1.7279	2.2001	BRD-K68532323	SB-743921
CTSB	HCC515	4.45164e-09	0.0154366	0.00032676	0.00032676	0.0110056	-0.4432	0.8617	0.6004	0.4739	0.4739	0.6842	BRD-K08799216	pelitinib
CTSB	A375	4.47867e-09	0.00311122	1.06679e-06	1.06679e-06	0.00314101	-0.1133	-3.988	-4.1193	-4.3318	-4.3318	-4.0701	BRD-A56085258	LGX-818
CTSB	HA1E	4.60984e-09	0.0477228	6.61184e-05	6.61184e-05	0.00651872	-0.0725	1.6011	1.5119	1.3129	1.3129	1.6005	BRD-K38852836	ganetespib
CTSB	HT29	4.64459e-09	0.0113376	0.000421104	0.000421104	0.00746406	-0.19715	1.8827	1.7947	0.8599	0.8599	1.9707	BRD-K65182930	NVP-AUY922
CTSB	HCC515	4.69324e-09	0.00314205	8.63177e-07	8.63177e-07	0.00287416	-0.4432	1.4384	1.7078	1.3885	1.3885	2.3055	BRD-U51024685	HG-6-64-01
CTSB	HT29	4.93403e-09	0.127456	0.000309979	0.000309979	0.0127877	-0.19715	1.99655	0.8117	1.0543	1.0543	1.18	BRD-K68532323	SB-743921
CTSB	A375	5.02521e-09	0.71472	0.000626396	0.000626396	0.00976204	-0.1133	1.4108	0.2408	1.4065	1.4065	1.1061	BRD-K97729603	pimecrolimus
CTSB	MCF7	5.06093e-09	0.00484253	0.00136265	0.00136265	0.00574756	-0.2102	1.6099	1.2559	0.73585	0.73585	1.7009	BRD-K85140930	aphidicolin
CTSB	A375	5.12304e-09	0.00487517	2.07409e-07	2.07409e-07	0.00233686	-0.1133	-0.67595	-0.7542	-0.6916	-0.6916	-0.8071	BRD-K02708799	GSK-1059615
CTSB	MCF7	5.30179e-09	0.00393681	0.000497088	0.000497088	0.00307777	-0.2102	-4.5336	-4.6184	-1.988	-1.988	-5.0354	BRD-A94756469	digoxin
CTSB	HA1E	5.323e-09	0.102184	7.84835e-05	7.84835e-05	0.0348	-0.0725	1.1655	0.8435	1.0677	1.0677	1.2183	BRD-K23363278	CYT-997
CTSB	MCF7	5.37865e-09	0.0313609	0.000120367	0.000120367	0.0131075	-0.2102	-1.29475	-1.1639	-1.2401	-1.2401	-1.3245	BRD-A15297126	fluocinolone-acetonide
CTSB	HA1E	5.46971e-09	0.0153432	0.000599256	0.000599256	0.00330861	-0.0725	2.8352	4.12125	2.52705	2.52705	3.6844	BRD-A28746609	paclitaxel
CTSB	A375	5.75196e-09	0.00292846	0.00199593	0.00199593	0.00281814	-0.1133	3.37285	2.9064	0.9758	0.9758	4.8638	BRD-K79131256	albendazole
CTSB	HCC515	5.79304e-09	0.00343251	0.00131173	0.00131173	0.00292601	-0.4432	1.8942	1.3636	0.6062	0.6062	2.1982	BRD-K68174511	torin-2
CTSB	A375	5.83487e-09	0.00786892	0.001009	0.001009	0.00675676	-0.1133	1.16965	1.2113	0.8112	0.8112	1.128	BRD-A45498368	WYE-125132
CTSB	PC3	6.35332e-09	0.00363109	0.00246098	0.00246098	0.00287765	-0.0636	3.0869	4.1519	2.28485	2.28485	3.0103	BRD-K03601870	ixabepilone
CTSB	A375	6.39808e-09	0.00276441	2.37849e-07	2.37849e-07	0.117019	-0.1133	3.8856	6.8111	5.3802	5.3802	1.1999	BRD-A68009927	daunorubicin
CTSB	A549	6.48278e-09	0.0036191	0.00206963	0.00206963	0.003286	0	-2.62195	-2.377	-1.6364	-1.6364	-2.6959	BRD-K12343256	trametinib
CTSB	PC3	6.53026e-09	0.0152053	1.20956e-06	1.20956e-06	0.0426124	-0.0636	2.7916	2.7063	2.95155	2.95155	2.9185	BRD-K47869605	podophyllotoxin
CTSB	HT29	6.62571e-09	0.00295069	0.00173956	0.00173956	0.0029602	-0.19715	5.45445	9.9531	4.7285	4.7285	10.6248	BRD-K92571446	WZ-3105
CTSB	A375	7.09691e-09	0.0062369	0.000791418	0.000791418	0.00435567	-0.1133	1.36785	1.8083	0.7922	0.7922	1.6743	BRD-A67097164	ifosfamide
CTSB	A375	7.25645e-09	0.00538459	0.000914174	0.000914174	0.00432222	-0.1133	-1.8324	-1.8324	-1.7792	-1.7792	-1.8492	BRD-A55272860	sulpiride
CTSB	A375	7.56364e-09	0.0465048	0.00205038	0.00205038	0.00540904	-0.1133	1.6129	0.7557	0.8115	0.8115	1.6129	BRD-K07310275	PF-04691502
CTSB	HT29	7.84468e-09	0.00708905	0.19769	0.19769	0.000177529	-0.19715	1.62865	1.2805	0.0376	0.0376	3.56665	BRD-K77908580	entinostat
CTSB	HCC515	7.87609e-09	0.00297871	0.00172808	0.00172808	0.00287416	-0.4432	2.26435	1.8143	0.6745	0.6745	2.8868	BRD-U60236422	WH-4-025
CTSB	HCC515	8.25363e-09	0.035365	6.39025e-05	6.39025e-05	0.0174005	-0.4432	0.9033	0.3528	0.6689	0.6689	0.7727	BRD-K25311561	KU-55933
CTSB	MCF7	8.35005e-09	0.00485615	0.000613385	0.000613385	0.00366392	-0.2102	1.2455	1.3336	1.1392	1.1392	1.6069	BRD-A64485570	trifluridine
CTSB	A375	8.71262e-09	0.00329389	0.00236585	0.00236585	0.0030915	-0.1133	-3.2787	-3.023	-1.5332	-1.5332	-4.1417	BRD-K20722021	CEP-32496
CTSB	PC3	8.71757e-09	0.0322392	0.000788916	0.000788916	0.00630203	-0.0636	1.10605	0.9658	0.8375	0.8375	2.1335	BRD-K13646352	midostaurin
CTSB	PC3	9.01608e-09	0.00347186	0.00286256	0.00286256	0.00292495	-0.0636	2.55945	2.1951	1.3614	1.3614	2.7424	BRD-K21361524	selinexor
CTSB	HT29	9.03616e-09	0.0381705	3.10541e-05	3.10541e-05	0.0200402	-0.19715	1.32365	1.50625	1.54455	1.54455	1.1116	BRD-A05821830	docetaxel
CTSB	A375	9.06893e-09	0.0261147	3.60147e-06	3.60147e-06	0.238248	-0.1133	1.45675	0.747	1.825	1.825	0.7783	BRD-A28746609	paclitaxel
CTSB	A549	9.13167e-09	0.0335392	0.00567641	0.00567641	0.000317878	0	-0.91315	-0.49005	-0.4865	-0.4865	-1.1856	BRD-K98143437	SB-239063
CTSB	HT29	9.61147e-09	0.0028113	0.00302594	0.00302594	0.0028113	-0.19715	14.4918	16.2305	1.5487	1.5487	15.6373	BRD-K76703230	YM-155
CTSB	A375	9.99798e-09	0.0169799	0.0210146	0.0210146	0.000288356	-0.1133	0.8028	0.53835	0.2981	0.2981	2.0226	BRD-K50168500	canertinib
CTSB	A375	1.15374e-08	0.0099862	0.00247689	0.00247689	0.00322172	-0.1133	2.15695	2.2316	2.2316	2.2316	2.0737	BRD-K03601870	ixabepilone
CTSB	MCF7	1.19793e-08	0.217151	0.0581449	0.0581449	0.000239815	-0.2102	0.2358	0.05135	0.00135	0.00135	0.5846	BRD-K02708799	GSK-1059615
CTSB	HA1E	1.2157e-08	0.00295149	6.58905e-05	6.58905e-05	0.238337	-0.0725	1.0608	1.26445	0.9381	0.9381	0.4397	BRD-K74065929	doramapimod
CTSB	HT29	1.25983e-08	0.00482218	0.00101382	0.00101382	0.00498798	-0.19715	2.21115	3.2415	0.6267	0.6267	2.717	BRD-K82135108	elesclomol
CTSB	A375	1.28619e-08	0.00863226	3.39766e-05	3.39766e-05	0.323252	-0.1133	1.23945	1.6659	0.9199	0.9199	2.0059	BRD-K92441787	bexarotene
CTSB	HT29	1.34628e-08	0.000928827	0.0389536	0.0389536	0.0028212	-0.19715	1.0522	1.09995	0.2948	0.2948	1.4908	BRD-K08109215	I-BET-762
CTSB	A549	1.36415e-08	0.00344896	0.00390774	0.00390774	0.00102478	0	0.7556	1.04995	0.51635	0.51635	0.88405	BRD-K03406345	azacitidine
CTSB	A375	1.39738e-08	0.000213861	0.000290401	0.000290401	0.000219774	-0.1133	0.90035	2.06615	1.0586	1.0586	3.85305	BRD-K88378636	withaferin-a
CTSB	A375	1.46879e-08	0.00618142	1.1896e-05	1.1896e-05	0.00924752	-0.1133	-1.48525	-1.6223	-1.6223	-1.6223	-1.4914	BRD-K01192156	tyrphostin-AG-112
CTSB	HEPG2	1.48213e-08	0.00347689	4.8639e-05	4.8639e-05	0.0273123	-0.2475	1.5963	1.5963	1.1568	1.1568	1.607	BRD-K99749624	linifanib
CTSB	HA1E	1.48519e-08	0.0421399	0.0579809	0.0579809	0.000189823	-0.0725	1.01025	0.60505	0.2984	0.2984	1.46835	BRD-K59369769	tozasertib
CTSB	HCC515	1.53978e-08	0.00749458	0.00123506	0.00123506	0.00625121	-0.4432	0.79125	0.8025	0.3609	0.3609	0.8159	BRD-K67868012	PI-103
CTSB	MCF7	1.64944e-08	0.00338862	0.00474155	0.00474155	0.00283466	-0.2102	3.6918	3.6228	0.9226	0.9226	5.4308	BRD-K21361524	selinexor
CTSB	A375	1.74131e-08	0.00295665	3.46157e-06	3.46157e-06	0.00278222	-0.1133	2.5375	2.3664	1.4287	1.4287	6.0334	BRD-K61443650	thiomersal
CTSB	MCF7	1.75649e-08	0.0454998	0.000118592	0.000118592	0.089632	-0.2102	1.2033	0.9546	1.302	1.302	0.5592	BRD-K36627727	tamibarotene
CTSB	A375	1.84239e-08	0.0504082	0.000168414	0.000168414	0.00722997	-0.1133	1.3067	1.7271	1.1614	1.1614	1.2612	BRD-A33280134	etoposide
CTSB	HCC515	1.87578e-08	0.00761794	0.00134071	0.00134071	0.00308672	-0.4432	1.39985	1.6861	0.9089	0.9089	1.9489	BRD-K76694128	rebastinib
CTSB	MCF7	1.87644e-08	0.0698401	0.000234714	0.000234714	0.0176212	-0.2102	1.0333	0.8518	1.2054	1.2054	0.6544	BRD-K06858286	cabazitaxel
CTSB	HA1E	1.89778e-08	0.00617771	0.00432692	0.00432692	0.003707	-0.0725	1.71865	1.4817	0.7765	0.7765	2.6291	BRD-A63236097	andrographolide
CTSB	A375	1.91008e-08	0.00659881	0.00107791	0.00107791	0.0195771	-0.1133	-1.8896	-1.8896	-1.0332	-1.0332	-2.1915	BRD-K31342827	bisindolylmaleimide
CTSB	HA1E	1.91103e-08	0.00536989	0.00461334	0.00461334	0.00309464	-0.0725	2.3521	1.6434	0.7529	0.7529	3.191	BRD-K43389698	BMS-387032
CTSB	A375	1.95868e-08	0.00355265	3.65237e-07	3.65237e-07	0.00434896	-0.1133	3.03265	4.1997	4.1997	4.1997	2.6534	BRD-K59325863	delanzomib
CTSB	A375	2.05339e-08	0.109322	0.000212625	0.000212625	0.0162895	-0.1133	1.1083	0.3445	1.1083	1.1083	1.0687	BRD-K89402695	L-655240
CTSB	HT29	2.05437e-08	0.00586137	3.53366e-05	3.53366e-05	0.00401502	-0.19715	1.81445	2.1644	1.5635	1.5635	4.4015	BRD-K29415052	BGT-226
CTSB	A375	2.05896e-08	0.00817142	0.0044321	0.0044321	0.00365436	-0.1133	1.54925	1.2516	0.7567	0.7567	1.6497	BRD-K00337317	NU-7441
CTSB	HEPG2	2.06529e-08	0.00419716	0.0028449	0.0028449	0.00347689	-0.2475	1.43575	2.0518	0.7771	0.7771	1.384	BRD-K70511574	HMN-214
CTSB	A549	2.13565e-08	0.00279774	0.00466405	0.00466405	0.00279774	0	4.89845	4.895	3.458	3.458	4.895	BRD-K68174511	torin-2
CTSB	A375	2.15566e-08	0.0155637	0.00470583	0.00470583	0.000596838	-0.1133	0.6564	0.52385	0.44235	0.44235	0.92115	BRD-K83963101	MLN-8054
CTSB	HA1E	2.17145e-08	0.00293074	0.000759654	0.000759654	0.00288407	-0.0725	4.2508	4.5857	0.6745	0.6745	5.217	BRD-K56844688	epirubicin
CTSB	MCF7	2.24899e-08	0.013786	1.03875e-05	1.03875e-05	0.0214937	-0.2102	1.1932	1.327	1.1448	1.1448	1.3194	BRD-K18157228	fdcyd
CTSB	A375	2.29208e-08	0.0619951	2.79709e-05	2.79709e-05	0.0171832	-0.1133	1.1034	0.9207	1.1434	1.1434	0.8481	BRD-K35169477	taranabant
CTSB	A375	2.42084e-08	0.0205513	3.73971e-05	3.73971e-05	0.014407	-0.1133	1.00745	0.9507	0.9507	0.9507	1.341	BRD-A43882281	pinacidil
CTSB	A375	2.50506e-08	0.146565	7.13937e-05	0.000699036	0.143737	-0.1133	1.2382	0.5389	1.1896	0.6398	0.4995	BRD-A34255068	rolipram
CTSB	HT29	2.5725e-08	0.00639554	1.78111e-05	1.78111e-05	0.0700232	-0.19715	1.3854	2.3796	1.9444	1.9444	0.7156	BRD-K93779381	ingenol-mebutate
CTSB	HT29	2.59309e-08	0.0659042	6.00037e-05	6.00037e-05	0.0693116	-0.19715	1.0161	0.2959	0.9159	0.9159	1.41445	BRD-K59317601	MLN-0128
CTSB	HA1E	2.69696e-08	0.0204269	0.000324502	0.000324502	0.00580897	-0.0725	-1.9957	-1.4003	-1.4003	-1.4003	-2.3793	BRD-K64538373	Ro-4987655
CTSB	MCF7	2.76172e-08	0.000525941	0.00127272	0.00127272	0.000361965	-0.2102	1.1218	1.9836	0.9176	0.9176	2.1843	BRD-K92571446	WZ-3105
CTSB	HT29	2.77016e-08	0.00709831	0.00156892	0.00156892	0.00648224	-0.19715	1.90715	2.0163	1.4617	1.4617	1.798	BRD-K03601870	ixabepilone
CTSB	HT29	2.78454e-08	0.0457202	3.29786e-05	3.29786e-05	0.00584369	-0.19715	2.26045	2.54085	3.2933	3.2933	2.417	BRD-K83699324	NMS-1286937
CTSB	MCF7	2.79986e-08	0.00830019	0.00135878	0.00135878	0.0322606	-0.2102	1.0916	0.9717	0.9717	0.9717	0.98715	BRD-K13050541	acivicin
CTSB	HA1E	2.86968e-08	0.0934131	0.00417113	0.00417113	0.00417439	-0.0725	1.84855	1.619	1.3688	1.3688	2.0555	BRD-K00259736	colchicine
CTSB	MCF7	2.91427e-08	0.104318	0.00552571	0.00552571	0.00353915	-0.2102	1.5059	1.1782	0.5642	0.5642	1.6046	BRD-K63504947	semaxanib
CTSB	A375	2.99716e-08	0.0145644	0.000331434	0.000331434	0.00279116	-0.1133	1.23375	1.1836	0.6745	0.6745	6.3631	BRD-K19416115	sitagliptin
CTSB	A375	3.00059e-08	0.035984	0.00087347	0.00087347	0.0130204	-0.1133	0.90135	0.8745	0.6637	0.6637	0.9282	BRD-K68407802	KIN001-055
CTSB	A375	3.05572e-08	0.0260161	2.18291e-05	2.18291e-05	0.0358541	-0.1133	-1.2604	-1.0563	-1.2491	-1.2491	-1.5115	BRD-A29734509	disopyramide
CTSB	A375	3.13671e-08	0.027981	0.00040926	0.00040926	0.0155413	-0.1133	-1.07595	-0.8884	-1.0184	-1.0184	-1.1034	BRD-K53581288	baricitinib
CTSB	PC3	3.20739e-08	0.0165924	7.185e-06	7.185e-06	0.0157792	-0.0636	2.2892	2.6775	2.986	2.986	2.5206	BRD-K78567475	dolastatin-10
CTSB	HCC515	3.22414e-08	0.0168901	0.000430039	0.000430039	0.0121793	-0.4432	1.48305	1.6224	0.1375	0.1375	1.9878	BRD-K68191783	ALW-II-38-3
CTSB	MCF7	3.26389e-08	0.0933317	0.00792949	0.00792949	0.0119108	-0.2102	0.5215	0.401	0.2513	0.2513	0.2065	BRD-K64890080	BI-2536
CTSB	A375	3.68063e-08	0.00417782	2.88008e-06	2.88008e-06	0.0104631	-0.1133	0.9429	1.6206	1.3731	1.3731	1.4502	BRD-K79501723	cyclizine
CTSB	MCF7	3.69868e-08	0.00376011	0.00884177	0.00884177	0.00275217	-0.2102	3.46305	2.057	0.63	0.63	5.1108	BRD-K74305673	IKK-2-inhibitor-V
CTSB	A375	3.70933e-08	0.0261902	0.000273845	0.000273845	0.00217653	-0.1133	0.8168	0.8912	0.8168	0.8168	0.8257	BRD-K12787259	CX-5461
CTSB	A549	3.71223e-08	0.00425889	1.10872e-05	1.10872e-05	0.0218672	0	-1.17055	-2.0294	-1.2634	-1.2634	-1.0777	BRD-K64052750	gefitinib
CTSB	HA1E	3.9436e-08	0.237365	0.00141271	0.00141271	0.00445505	-0.0725	1.3522	0.2862	1.2489	1.2489	1.9469	BRD-A43882281	pinacidil
CTSB	A375	4.1883e-08	0.0251428	0.00575759	0.00575759	0.00726184	-0.1133	1.5716	1.5716	0.44685	0.44685	1.9553	BRD-K48812570	macitentan
CTSB	HA1E	4.2019e-08	0.00488567	0.00247059	0.00247059	0.00426611	-0.0725	1.8113	1.6981	1.6981	1.6981	1.8386	BRD-K65182930	NVP-AUY922
CTSB	HCC515	4.21358e-08	0.00853363	0.000129772	0.000129772	0.00812978	-0.4432	0.84305	0.8533	0.5778	0.5778	0.8476	BRD-K50168500	canertinib
CTSB	A375	4.24805e-08	0.0206585	0.00349465	0.00349465	0.00570174	-0.1133	1.03535	0.7726	0.5256	0.5256	1.23	BRD-A69815203	cyclosporin-a
CTSB	HA1E	4.31755e-08	0.0144502	3.03471e-05	3.03471e-05	0.020804	-0.0725	1.17955	1.6055	1.3162	1.3162	0.8528	BRD-K24496482	SB-590885
CTSB	HA1E	4.50515e-08	0.0100724	0.00180865	0.00180865	0.0191713	-0.0725	1.8845	2.1848	1.3112	1.3112	2.47225	BRD-K92241597	tosedostat
CTSB	HA1E	4.93694e-08	0.0932507	0.0693745	0.0693745	0.00344338	-0.0725	0.7139	0.5508	0.22245	0.22245	0.73375	BRD-K64800655	PHA-793887
CTSB	A375	5.05724e-08	0.0124583	0.000124192	0.000124192	0.0339945	-0.1133	0.8901	0.8901	0.8392	0.8392	0.8481	BRD-K73237276	tacalcitol
CTSB	HCC515	5.15505e-08	0.00485502	7.53304e-06	7.53304e-06	0.00297871	-0.4432	1.50345	1.1763	1.1763	1.1763	1.8306	BRD-K29415052	BGT-226
CTSB	A375	5.27593e-08	0.00529581	0.00918037	0.00918037	0.00341028	-0.1133	1.7285	1.7285	0.8893	0.8893	1.7664	BRD-K31339321	lirimilast
CTSB	A375	5.53581e-08	0.0430607	0.000299566	0.000299566	0.00481966	-0.1133	0.8945	0.747	0.747	0.747	1.4797	BRD-K34313798	LY-215490
CTSB	A375	5.60297e-08	0.190791	0.00387675	0.00387675	0.0154357	-0.1133	1.6743	0.4958	0.7922	0.7922	2.576	BRD-K64925568	AMG-232
CTSB	PC3	5.86505e-08	0.00309115	0.000226838	0.000226838	0.00299237	-0.0636	1.7316	2.3185	2.2774	2.2774	4.3569	BRD-K78659596	ixazomib
CTSB	MCF7	6.31709e-08	0.0234987	0.0470172	0.0470172	0.00550612	-0.2102	1.2736	0.9323	0.2666	0.2666	1.3987	BRD-K35960502	niclosamide
CTSB	A375	6.43488e-08	0.0263461	4.11932e-05	4.11932e-05	0.0390842	-0.1133	0.7895	0.7325	0.8671	0.8671	0.6462	BRD-A50675702	fipronil
CTSB	MCF7	6.5605e-08	0.0032345	0.000284522	0.000284522	0.00337879	-0.2102	1.8195	2.0968	1.8798	1.8798	2.9427	BRD-K76401790	JNK-IN-5A
CTSB	HEPG2	6.59079e-08	0.160543	0.00402449	0.00402449	0.00480327	-0.2475	0.988	0.2561	0.6516	0.6516	1.1631	BRD-K42918627	GSK-2126458
CTSB	MCF7	6.77189e-08	0.0297984	0.00542059	0.00542059	0.00461621	-0.2102	1.2227	1.166	0.5972	0.5972	1.3953	BRD-K03601870	ixabepilone
CTSB	A375	6.80252e-08	0.0126665	0.00019554	0.00019554	0.0109294	-0.1133	0.84215	0.922	0.8304	0.8304	0.8539	BRD-K79989959	nesbuvir
CTSB	A375	6.87082e-08	0.0143874	0.0080047	0.0080047	0.00500679	-0.1133	1.1887	1.1672	0.5546	0.5546	1.8223	BRD-K01824921	DPCPX
CTSB	HA1E	6.92632e-08	0.165348	0.000505663	0.000505663	0.0637615	-0.0725	1.30155	0.9842	0.9842	0.9842	1.9562	BRD-K58435339	AT-13387
CTSB	A549	7.21757e-08	0.00494501	1.73638e-05	1.73638e-05	0.901521	0	-1.4374	-1.738	-1.4055	-1.4055	0	BRD-K57080016	selumetinib
CTSB	A375	7.23298e-08	0.00390206	0.0010833	0.0010833	0.00531989	-0.1133	-1.6998	-3.1006	-1.6998	-1.6998	-1.6417	BRD-K15170068	swainsonine
CTSB	A549	7.30928e-08	0.0155987	0.00326043	0.00326043	0.00470593	0	-1.196	-1.0618	-0.773	-0.773	-1.5052	BRD-K70401845	erlotinib
CTSB	HT29	7.34222e-08	0.0576389	0.0791848	0.0791848	0.0120237	-0.19715	1.1103	0.9358	0.487	0.487	2.38525	BRD-K36740062	GSK-1070916
CTSB	A375	7.46644e-08	0.00543359	0.0107929	0.0107929	0.00354151	-0.1133	-2.52525	-1.6992	-1.565	-1.565	-2.5782	BRD-A85439007	idoxuridin
CTSB	MCF7	7.56883e-08	0.0401379	0.0143537	0.0143537	0.00285143	-0.2102	2.26425	0.8803	0.8803	0.8803	3.368	BRD-K96123349	brequinar
CTSB	HA1E	8.84027e-08	0.0444473	0.00129792	0.00129792	0.0101876	-0.0725	1.0101	0.9142	0.8708	0.8708	1.0743	BRD-K42918627	GSK-2126458
CTSB	A375	8.89904e-08	0.00344267	0.0146637	0.0146637	0.00325247	-0.1133	1.9612	2.053	0.6034	0.6034	1.8694	BRD-K38473998	cilomilast
CTSB	HA1E	9.15074e-08	0.00377748	0.0133516	0.0133516	0.00304559	-0.0725	2.7722	3.3201	1.5617	1.5617	3.9627	BRD-K03601870	ixabepilone
CTSB	HT29	9.16444e-08	0.00718289	0.0116065	0.0116065	0.00443614	-0.19715	2.62915	1.7022	0.7851	0.7851	3.1589	BRD-K16485616	mocetinostat
CTSB	HA1E	9.6486e-08	0.00327724	0.0154575	0.0154575	0.00302617	-0.0725	2.8542	2.7867	0.6745	0.6745	3.7128	BRD-A28467416	PKI-179
CTSB	HA1E	9.7543e-08	0.0122074	3.39234e-05	3.39234e-05	0.0714458	-0.0725	0.8929	0.89785	1.0767	1.0767	0.38035	BRD-K23984367	sorafenib
CTSB	A549	9.836e-08	0.000353095	3.3999e-07	3.3999e-07	0.00218099	0	0.9553	1.442	1.0734	1.0734	0.8267	BRD-K25340465	OSI-930
CTSB	HT29	1.03014e-07	0.0516369	0.00458368	0.00458368	0.0039033	-0.19715	3.1114	2.1877	0.8873	0.8873	4.8332	BRD-K52233191	R-547
CTSB	HEPG2	1.04268e-07	0.010251	0.00651395	0.00651395	0.00849428	-0.2475	0.8324	0.8944	0.4024	0.4024	0.7704	BRD-K05870596	XMD-1499
CTSB	HA1E	1.04564e-07	0.00631779	0.00310805	0.00310805	0.0120614	-0.0725	1.33375	1.4334	0.7721	0.7721	1.6988	BRD-K69932463	AZD-8055
CTSB	MCF7	1.06393e-07	0.00803884	0.00355859	0.00355859	0.0216301	-0.2102	1.1948	0.9352	0.9352	0.9352	1.3347	BRD-A12230535	nutlin-3
CTSB	PC3	1.07565e-07	NA	NA	NA	NA	-0.0636	0.166	NA	NA	NA	NA	BRD-K50691590	bortezomib
CTSB	MCF7	1.09504e-07	0.00816871	0.0461092	0.0461092	0.00136248	-0.2102	0.6745	0.6792	0.05865	0.05865	1.14845	BRD-K52911425	GDC-0941
CTSB	HA1E	1.11666e-07	0.00317462	0.0212835	0.0212835	0.00298766	-0.0725	3.7738	3.1267	2.67625	2.67625	4.2114	BRD-K74057757	indibulin
CTSB	HA1E	1.13703e-07	0.0340553	0.00120453	0.00120453	0.00276013	-0.0725	0.962	1.06755	0.9096	0.9096	0.98035	BRD-K81528515	nilotinib
CTSB	MCF7	1.16423e-07	0.0150694	0.00823982	0.00823982	0.0148411	-0.2102	2.8614	3.1287	0.44845	0.44845	3.6823	BRD-K79131256	albendazole
CTSB	A549	1.1778e-07	0.125495	0.033074	0.033074	8.64962e-05	0	0.8829	0.6093	0.432	0.432	1.34925	BRD-K24515980	QL-XI-92
CTSB	HT29	1.1974e-07	0.0369885	0.439583	0.439583	0.00010051	-0.19715	1.7848	0.8556	-0.07195	-0.07195	2.45175	BRD-K88378636	withaferin-a
CTSB	HA1E	1.22462e-07	0.0134376	3.30635e-05	3.30635e-05	0.0356505	-0.0725	1.0704	1.0761	1.0761	1.0761	1.1517	BRD-A49399758	desmopressin-acetate
CTSB	HEPG2	1.25918e-07	0.00366126	9.25247e-05	9.25247e-05	0.240094	-0.2475	1.7057	1.7057	1.7057	1.7057	1.3879	BRD-K65182930	NVP-AUY922
CTSB	A375	1.26597e-07	0.0350407	0.00829733	0.00829733	0.00835063	-0.1133	0.98235	0.8343	0.6432	0.6432	1.3227	BRD-K76197012	ulipristal
CTSB	HCC515	1.26932e-07	0.00635603	0.000150161	0.000150161	0.417379	-0.4432	0.95	1.0299	0.8567	0.8567	0.4836	BRD-A68739437	NPK76-II-72-1
CTSB	A375	1.33092e-07	0.0315532	0.000349852	0.000349852	0.033912	-0.1133	0.9227	0.6306	0.9402	0.9402	0.514	BRD-K18157228	fdcyd
CTSB	HA1E	1.37862e-07	0.40598	0.0220697	0.0220697	0.0162385	-0.0725	-1.2243	-1.2243	-0.6443	-0.6443	-1.52975	BRD-K20285085	fostamatinib
CTSB	HCC515	1.39672e-07	0.0181916	5.74563e-05	5.74563e-05	0.00761794	-0.4432	0.9006	0.3918	0.949	0.949	1.7272	BRD-K67578145	GDC-0879
CTSB	HT29	1.40969e-07	0.0257644	0.00153851	0.00153851	0.0737687	-0.19715	1.42675	0.9769	0.9769	0.9769	1.1004	BRD-U07805514	saracatinib
CTSB	A375	1.42074e-07	0.0157444	5.88281e-06	5.88281e-06	0.0853883	-0.1133	3.09565	2.60065	2.9044	2.9044	3.5422	BRD-K88510285	bortezomib
CTSB	A549	1.45509e-07	0.00306795	0.00774621	0.00774621	0.0132676	0	1.4056	1.869	0.6482	0.6482	1.0804	BRD-U60236422	WH-4-025
CTSB	A375	1.52006e-07	0.021927	0.0158849	0.0158849	0.00443007	-0.1133	1.6964	0.6745	0.62935	0.62935	1.7017	BRD-K28731095	calcitriol
CTSB	HA1E	1.55315e-07	0.122636	0.0145297	0.0145297	0.00715643	-0.0725	1.29155	0.4682	0.4682	0.4682	1.7473	BRD-K74305673	IKK-2-inhibitor-V
CTSB	A375	1.56874e-07	0.347412	0.00365816	0.00365816	0.146978	-0.1133	0.6704	0.5211	0.61445	0.61445	0.249	BRD-K99545815	PF-562271
CTSB	HT29	1.58728e-07	0.0029602	1.12118e-05	1.12118e-05	0.0672942	-0.19715	5.1223	13.2953	6.6439	6.6439	2.18035	BRD-K76674262	homoharringtonine
CTSB	A375	1.58974e-07	0.00591062	0.0184248	0.0184248	0.00425603	-0.1133	1.33945	1.1672	0.5255	0.5255	1.3835	BRD-K03816923	rottlerin
CTSB	HCC515	1.63053e-07	0.00287416	0.0176734	0.0176734	0.00292601	-0.4432	3.8392	4.263	4.0387	4.0387	2.9286	BRD-K92571446	WZ-3105
CTSB	A375	1.65453e-07	0.0485351	0.00269585	0.00269585	0.0356816	-0.1133	0.8512	0.4118	0.447	0.447	0.9561	BRD-K03289534	lersivirine
CTSB	HA1E	1.70841e-07	0.057938	0.00525241	0.00525241	0.0114535	-0.0725	1.1737	0.6745	0.7429	0.7429	2.1203	BRD-A67097164	ifosfamide
CTSB	HT29	1.71159e-07	0.0152086	0.000251579	0.000251579	0.106499	-0.19715	2.0527	4.1467	0.7193	0.7193	8.4081	BRD-K12867552	PCI-24781
CTSB	MCF7	1.71964e-07	0.919014	0.0967604	0.0967604	0.0233929	-0.2102	0.5902	-0.0934	0.21515	0.21515	0.8651	BRD-A45498368	WYE-125132
CTSB	HA1E	1.77236e-07	0.00421348	0.00836181	0.00836181	0.0182024	-0.0725	2.2126	2.2126	0.5473	0.5473	2.52295	BRD-K89561498	SN-38
CTSB	HCC515	1.81256e-07	0.0400694	0.00158893	0.00158893	0.00909998	-0.4432	1.2402	1.0563	0.61305	0.61305	1.4799	BRD-K53417444	OTS-167
CTSB	PC3	1.85324e-07	0.0259881	0.00975888	0.00975888	0.011744	-0.0636	1.19765	0.8169	0.6633	0.6633	1.1417	BRD-K94012289	OSI-027
CTSB	A549	1.8622e-07	0.265286	0.00381144	0.00381144	0.00978454	0	0.7927	0.176	0.4121	0.4121	1.0591	BRD-K83963101	MLN-8054
CTSB	HT29	1.97293e-07	0.0169516	0.00282765	0.00282765	0.0219684	-0.19715	2.6875	5.9488	1.8159	1.8159	2.8063	BRD-K34022604	clofarabine
CTSB	MCF7	2.06276e-07	0.003369	0.000671596	0.000671596	0.00324394	-0.2102	1.66345	2.3938	1.5633	1.5633	2.5822	BRD-K82135108	elesclomol
CTSB	HA1E	2.07652e-07	0.0152416	8.74128e-05	8.74128e-05	0.0153432	-0.0725	3.1337	4.07955	1.5418	1.5418	4.02775	BRD-K92571446	WZ-3105
CTSB	HCC515	2.20389e-07	0.0586976	0.00702593	0.00702593	0.0224751	-0.4432	0.88155	0.88	0.8006	0.8006	0.8587	BRD-K22096725	ALW-II-49-7
CTSB	HA1E	2.30759e-07	0.00865219	0.000236607	0.000236607	0.00772438	-0.0725	0.92005	1.484	0.732	0.732	2.1442	BRD-K58550667	FK-866
CTSB	HA1E	2.32242e-07	0.00359217	7.23945e-05	7.23945e-05	0.00377748	-0.0725	2.3359	2.0704	2.8204	2.8204	2.3359	BRD-K59325863	delanzomib
CTSB	A375	2.3379e-07	0.0773433	0.0385323	0.0385323	0.00232769	-0.1133	0.4828	0.5297	0.1616	0.1616	0.5967	BRD-K02113016	olaparib
CTSB	A549	2.35297e-07	0.171811	0.000819519	0.000819519	0.00744508	0	0.8313	0.8313	0.8313	0.8313	1.5617	BRD-K44100512	KIN001-043
CTSB	PC3	2.39463e-07	0.907342	0.095938	0.179338	0.00929612	-0.0636	-1.0966	0	-0.3636	-0.2984	-1.0451	BRD-K08109215	I-BET-762
CTSB	HT29	2.39783e-07	0.124158	0.0092163	0.0092163	0.00528654	-0.19715	2.06945	0.3791	0.3791	0.3791	2.6694	BRD-A64485570	trifluridine
CTSB	A549	2.40052e-07	0.629488	0.0534838	0.0534838	0.0119637	0	0.6745	0.2489	0.2489	0.2489	0.87565	BRD-K30632436	CTB
CTSB	HT29	2.41854e-07	0.00953106	0.000210139	0.000210139	0.0371607	-0.19715	1.3123	1.3181	1.3065	1.3065	2.161	BRD-K07881437	danusertib
CTSB	MCF7	2.42699e-07	0.00379292	0.00290059	0.00290059	0.00195386	-0.2102	0.4909	1.23195	0.2513	0.2513	1.28165	BRD-K67868012	PI-103
CTSB	A375	2.44146e-07	0.00292846	0.000453313	0.000453313	0.00481231	-0.1133	1.98825	3.7172	2.0037	2.0037	2.6289	BRD-K92571446	WZ-3105
CTSB	A375	2.44154e-07	0.0470463	0.0183269	0.0183269	0.00792629	-0.1133	1.59335	0.6745	0.2544	0.2544	1.7629	BRD-K44408410	2-methoxyestradiol
CTSB	HT29	2.46566e-07	0.00733781	0.0169207	0.0169207	0.0020959	-0.19715	1.32085	0.9855	0.54045	0.54045	2.75255	BRD-K13390322	AT-7519
CTSB	HT29	2.49979e-07	0.0276598	7.09418e-05	7.09418e-05	0.0146382	-0.19715	1.3572	1.3249	1.4889	1.4889	1.1174	BRD-K76401790	JNK-IN-5A
CTSB	A375	2.51542e-07	0.175641	0.000336498	0.000336498	0.123321	-0.1133	0.9501	0.8431	0.9733	0.9733	0.4402	BRD-K19111024	clofibric-acid
CTSB	A375	2.58593e-07	0.0312829	0.00738448	0.00738448	0.00329389	-0.1133	1.47845	1.9753	0.997	0.997	1.8616	BRD-K68747584	PF-03814735
CTSB	HEPG2	2.63772e-07	0.163483	0.655179	0.655179	0.027859	-0.2475	0.81195	0.2036	-0.46525	-0.46525	0.0638	BRD-K21680192	mitoxantrone
CTSB	HT29	2.63806e-07	0.131705	0.00419868	0.00419868	0.0260281	-0.19715	1.0615	0.3113	0.5382	0.5382	0.7913	BRD-K54606188	JQ1-(+)
CTSB	MCF7	2.65023e-07	NA	NA	NA	NA	-0.2102	3.4911	NA	NA	NA	NA	BRD-A61304759	tanespimycin
CTSB	MCF7	2.65081e-07	0.010272	0.00026739	0.00026739	0.0147694	-0.2102	-1.797	-1.797	-1.6659	-1.6659	-2.2782	BRD-K41170226	deoxycholic-acid
CTSB	HA1E	2.67154e-07	0.0116313	0.0203611	0.0203611	0.00525691	-0.0725	1.40745	1.1224	0.5968	0.5968	1.6988	BRD-A45498368	WYE-125132
CTSB	A375	2.83905e-07	0.00304271	9.47066e-06	9.47066e-06	0.00292846	-0.1133	1.89375	2.6289	1.6497	1.6497	3.4061	BRD-K48488978	YM-201636
CTSB	A375	2.89982e-07	0.00899945	0.0012684	0.0012684	0.0928356	-0.1133	0.72685	1.6816	0.6197	0.6197	0.7463	BRD-K01577834	adenosine
CTSB	A375	2.91214e-07	0.095533	0.00498379	0.00498379	0.0562046	-0.1133	0.97865	0.9424	0.5461	0.5461	0.5176	BRD-K08248804	LCL-161
CTSB	HA1E	3.1838e-07	0.141566	0.00076988	0.00076988	0.235806	-0.0725	0.9848	0.6329	0.6472	0.6472	0.2803	BRD-U64521890	XMD-16144
CTSB	A375	3.27528e-07	0.0214783	0.00280276	0.00280276	0.813681	-0.1133	-1.1767	-1.0805	-0.9524	-0.9524	-0.2381	BRD-K16761703	sotrastaurin
CTSB	A549	3.30119e-07	0.0730274	0.22414	0.22414	0.00152954	0	1.0203	0.68005	0	0	1.1897	BRD-K53561341	aurora-a-inhibitor-i
CTSB	HCC515	3.33551e-07	0.00594601	0.0294185	0.0294185	0.00287416	-0.4432	2.07315	0.9583	0	0	2.8799	BRD-K13390322	AT-7519
CTSB	HA1E	3.34575e-07	0.116098	2.86197e-05	2.86197e-05	0.183122	-0.0725	1.9511	1.7266	2.0253	2.0253	1.6914	BRD-K68532323	SB-743921
CTSB	A375	3.35114e-07	0.00762083	0.00857088	0.00857088	0.0191506	-0.1133	-1.7938	-1.4771	-1.2089	-1.2089	-1.7328	BRD-K19601669	S-ruxolitinib
CTSB	A375	3.39008e-07	0.048591	0.00458259	0.00458259	0.0236529	-0.1133	1.2367	0.6745	0.8619	0.8619	1.2367	BRD-K79602928	metformin
CTSB	HEPG2	3.43113e-07	NA	NA	NA	NA	-0.2475	2.7689	NA	NA	NA	NA	BRD-A61304759	tanespimycin
CTSB	PC3	3.51456e-07	0.00278513	0.000203394	0.000203394	0.00373693	-0.0636	2.0395	3.7358	2.5286	2.5286	3.3081	BRD-A36331462	oprozomib
CTSB	HCC515	3.53446e-07	0.0181916	0.00362584	0.00362584	0.0370714	-0.4432	0.491	0.4912	0.1746	0.1746	0.4908	BRD-K94012289	OSI-027
CTSB	MCF7	3.62439e-07	0.00944797	0.00329234	0.00329234	0.0101921	-0.2102	0.9342	1.313	0.9746	0.9746	0.8938	BRD-A31159102	fluoxetine
CTSB	A375	3.62936e-07	0.0852682	0.000811172	0.000811172	0.0182397	-0.1133	0.6675	0.6917	0.6453	0.6453	1.0904	BRD-A45540146	KI-20227
CTSB	A375	3.71102e-07	0.060503	0.0241867	0.0241867	0.00375871	-0.1133	1.1095	1.0225	0.3379	0.3379	1.639	BRD-K98493452	honokiol
CTSB	A375	3.72286e-07	0.0690168	0.00250013	0.00250013	0.0397874	-0.1133	-1.8549	-0.7305	-1.061	-1.061	-2.0936	BRD-K23204545	busulfan
CTSB	A375	3.73838e-07	0.0767601	0.0146635	0.0146635	0.0119509	-0.1133	0.938	0.3981	0.3981	0.3981	0.9673	BRD-A02367930	ethinyl-estradiol
CTSB	HT29	3.80438e-07	0.0401814	0.000225526	0.000225526	0.252102	-0.19715	1.20425	0.5678	2.1654	2.1654	0.0245	BRD-K03390685	cobimetinib
CTSB	PC3	3.96154e-07	0.206277	0.000291689	0.000291689	0.0106119	-0.0636	0.8277	0.3625	1.0569	1.0569	1.3395	BRD-A36010170	amcinonide
CTSB	A375	3.9854e-07	0.0127015	0.0140337	0.0140337	0.00912926	-0.1133	-1.29455	-1.1345	-0.5949	-0.5949	-1.4546	BRD-K68867920	quetiapine
CTSB	MCF7	4.04803e-07	0.0187063	2.48241e-05	2.48241e-05	0.0239716	-0.2102	-1.3193	-3.5029	-1.8555	-1.8555	-1.12335	BRD-K88573743	A-443654
CTSB	PC3	4.09922e-07	0.111226	0.000394226	0.000394226	0.0507573	-0.0636	-1.1793	-1.0199	-1.3387	-1.3387	-0.958	BRD-K09078998	deforolimus
CTSB	A375	4.16444e-07	0.182778	7.44161e-05	7.44161e-05	0.0182638	-0.1133	0.978	0.1689	1.2659	1.2659	0.9691	BRD-A15931911	bucladesine
CTSB	A549	4.27921e-07	0.0666136	0.0839703	0.0839703	0.00113088	0	0.84845	0.6059	0.4231	0.4231	1.2701	BRD-K33379087	tivantinib
CTSB	HA1E	4.33609e-07	0.0431607	0.000401184	0.000401184	0.0474469	-0.0725	0.9852	1.3981	1.3981	1.3981	0.6745	BRD-K82522873	N6022
CTSB	A375	4.40934e-07	0.301234	0.00422592	0.00422592	0.0100604	-0.1133	0.67175	0.55315	0.48385	0.48385	0.86615	BRD-K11153516	iniparib
CTSB	A549	4.40972e-07	0.00338095	7.87686e-05	7.87686e-05	0.00353807	0	1.9772	1.9772	1.9772	1.9772	1.6488	BRD-K13662825	dinaciclib
CTSB	A375	4.56032e-07	0.0331364	0.00132195	0.00132195	0.032297	-0.1133	-1.29445	-1.6824	-0.8299	-0.8299	-1.4342	BRD-K38852836	ganetespib
CTSB	A375	4.6081e-07	0.0949497	0.00296766	0.00296766	0.0332579	-0.1133	0.77025	0.5153	0.5875	0.5875	0.8013	BRD-K83405785	pimavanserin
CTSB	HT29	4.61451e-07	0.0200822	0.00260078	0.00260078	0.0162393	-0.19715	3.8432	3.39025	2.3848	2.3848	7.2061	BRD-K23363278	CYT-997
CTSB	HA1E	4.61559e-07	0.0506313	0.00118524	0.00118524	0.00957147	-0.0725	-0.96215	-1.1255	-0.64545	-0.64545	-1.4782	BRD-K17743125	belinostat
CTSB	HEPG2	4.67138e-07	0.124791	0.000857487	0.000857487	0.0239393	-0.2475	0.73185	0.6561	0.7536	0.7536	0.4545	BRD-K37720887	SB-525334
CTSB	HA1E	4.89822e-07	0.236752	0.480352	0.480352	1.68458e-05	-0.0725	0.83605	0.3683	-0.19195	-0.19195	5.4458	BRD-K21680192	mitoxantrone
CTSB	HEPG2	4.91361e-07	0.012138	0.00063748	0.00063748	0.227429	-0.2475	0.8185	0.6102	0.5532	0.5532	1.0092	BRD-K64890080	BI-2536
CTSB	HT29	4.95545e-07	0.0164526	0.00334736	0.00334736	0.0145185	-0.19715	1.2552	1.2788	0.6739	0.6739	3.2143	BRD-K00259736	colchicine
CTSB	HA1E	5.06144e-07	0.00647036	0.00199076	0.00199076	0.0125056	-0.0725	-1.4071	-2.1485	-1.0543	-1.0543	-1.5582	BRD-K50140147	NVP-TAE684
CTSB	A549	5.09002e-07	0.00630708	0.00268611	0.00268611	0.248343	0	1.0161	1.1268	0.80685	0.80685	0.39615	BRD-K70511574	HMN-214
CTSB	HEPG2	5.19696e-07	0.0559632	0.00050756	0.00050756	0.0679559	-0.2475	0.60515	0.5018	0.5018	0.5018	0.7666	BRD-K53414658	tivozanib
CTSB	PC3	5.41156e-07	0.000439359	0.00693945	0.00693945	0.000222677	-0.0636	1.0505	1.4635	0.67985	0.67985	2.90775	BRD-K13390322	AT-7519
CTSB	HCC515	5.43634e-07	0.0100125	5.02627e-05	5.02627e-05	0.0129557	-0.4432	-1.6186	-1.9436	-1.9436	-1.9436	-1.5329	BRD-K53972329	ruxolitinib
CTSB	HA1E	5.50734e-07	0.00516179	1.93754e-06	1.93754e-06	0.478839	-0.0725	1.48995	1.6416	1.848	1.848	0.9192	BRD-K93779381	ingenol-mebutate
CTSB	MCF7	5.53007e-07	0.0194185	0.0448658	0.0448658	0.00381454	-0.2102	1.3916	0.5959	0.3201	0.3201	1.4191	BRD-K64925568	AMG-232
CTSB	A375	5.58389e-07	0.0331364	0.00426595	0.00426595	0.118161	-0.1133	1.2517	0.7619	0.8414	0.8414	1.3539	BRD-K01621533	acarbose
CTSB	HT29	5.62813e-07	0.281226	0.818423	0.818423	0.364346	-0.19715	1.5734	0.3699	-0.3832	-0.3832	0	BRD-K81418486	vorinostat
CTSB	PC3	5.67639e-07	0.023305	0.0167942	0.0167942	0.00760366	-0.0636	-0.78555	-1.5685	-0.62695	-0.62695	-2.19685	BRD-K51313569	palbociclib
CTSB	MCF7	5.75576e-07	0.0256846	0.0365556	0.0365556	0.00422802	-0.2102	1.10865	0.7982	0.6807	0.6807	1.4246	BRD-K68747584	PF-03814735
CTSB	HT29	5.81815e-07	0.0155535	0.0999033	0.0999033	0.00311626	-0.19715	8.4588	8.49195	2.46945	2.46945	8.5046	BRD-K21361524	selinexor
CTSB	HA1E	5.86143e-07	0.0449183	0.000203495	0.000203495	0.288454	-0.0725	1.0074	1.0074	1.0662	1.0662	0.3887	BRD-A83081521	finasteride
CTSB	MCF7	5.8999e-07	0.00321569	0.0560399	0.0560399	0.00291082	-0.2102	2.7938	2.4058	-0.0251	-0.0251	2.9916	BRD-K99113996	AZD-2014
CTSB	A375	5.9044e-07	0.0248259	0.039906	0.039906	0.00332527	-0.1133	1.2128	0.7271	0.562	0.562	2.5614	BRD-K34154330	tracazolate
CTSB	HT29	5.96776e-07	0.00432055	0.00062457	0.00062457	0.0254704	-0.19715	7.53815	8.8856	3.5444	3.5444	13.1173	BRD-K15179879	carfilzomib
CTSB	A375	6.04626e-07	0.101014	0.00219224	0.00219224	0.0326545	-0.1133	0.6758	0.6462	0.6462	0.6462	0.6462	BRD-K50498985	taladegib
CTSB	A375	6.11537e-07	0.45938	0.00539627	0.00539627	0.0333797	-0.1133	0.7507	0.2408	0.3719	0.3719	0.7507	BRD-K78126613	menadione
CTSB	A375	6.26843e-07	0.0312061	0.000528336	0.000528336	0.0641496	-0.1133	0.7053	0.8171	0.5891	0.5891	0.6617	BRD-K65182930	NVP-AUY922
CTSB	HT29	6.38104e-07	0.0879107	0.000526996	0.000526996	0.0131112	-0.19715	1.2825	1.1434	1.14475	1.14475	1.3114	BRD-K34185671	AMG-517
CTSB	MCF7	6.61771e-07	0.00661984	0.0501927	0.0501927	0.00426425	-0.2102	1.59085	1.1548	0.2003	0.2003	2.8124	BRD-K56032964	AP-26113
CTSB	PC3	6.91711e-07	0.00822521	0.0147963	0.0147963	0.00524468	-0.0636	1.481	1.405	0.974	0.974	1.8118	BRD-A13084692	troglitazone
CTSB	A375	6.92554e-07	0.0149849	1.48501e-05	1.48501e-05	0.0214228	-0.1133	-1.211	-1.467	-1.2613	-1.2613	-0.9814	BRD-K35520305	dacarbazine
CTSB	PC3	7.05326e-07	0.0197092	0.0011368	0.0011368	0.103062	-0.0636	1.39	2.6001	1.50985	1.50985	2.2155	BRD-A00376169	KBG
CTSB	PC3	7.10048e-07	0.320464	0.00125723	0.00125723	0.119536	-0.0636	1.11385	0.3425	1.3721	1.3721	1.051	BRD-K18157228	fdcyd
CTSB	MCF7	7.29575e-07	0.00561631	0.0182484	0.0182484	0.00107311	-0.2102	0.7494	0.9028	0.3374	0.3374	1.3953	BRD-K63068307	ZSTK-474
CTSB	PC3	7.30365e-07	0.00292495	0.00018691	0.00018691	0.00275791	-0.0636	2.48105	2.4972	1.2201	1.2201	4.5651	BRD-K22848513	bardoxolone-methyl
CTSB	PC3	7.30378e-07	0.00769491	0.000751935	0.000751935	0.00893068	-0.0636	1.8336	2.6203	1.9389	1.9389	1.7283	BRD-K55026842	azacitidine
CTSB	A375	7.34299e-07	0.00845984	3.20217e-05	3.20217e-05	0.00519259	-0.1133	0.9553	1.1569	0.9599	0.9599	1.3739	BRD-K43966364	penicillin-v-potassium
CTSB	MCF7	7.4967e-07	0.0094728	8.09391e-05	8.09391e-05	0.0811937	-0.2102	0.7366	1.3483	1.2431	1.2431	0.477	BRD-A44863528	proglumide
CTSB	HA1E	7.52553e-07	0.00577408	1.86796e-06	1.86796e-06	0.307177	-0.0725	1.2901	1.653	1.5968	1.5968	0.6267	BRD-K68870568	flumatinib
CTSB	A375	7.52568e-07	0.390919	0.0197544	0.0197544	0.0116392	-0.1133	0.88895	0.6259	0.6259	0.6259	1.2303	BRD-K12932420	YM-976
CTSB	HA1E	7.66858e-07	0.152823	0.000837367	0.000837367	0.0876446	-0.0725	1.1072	2.3044	1.9573	1.9573	0.91135	BRD-K68191783	ALW-II-38-3
CTSB	HCC515	7.72395e-07	0.0176608	0.00245973	0.00245973	0.00625121	-0.4432	0.6596	0.619	0.1379	0.1379	1.0379	BRD-K13566078	BMS-345541
CTSB	MCF7	8.07805e-07	0.0185805	0.020478	0.0265627	0.0214676	-0.2102	1.1315	1.27845	0.4234	0.3075	1.0865	BRD-K36363294	I-BET-151
CTSB	HT29	8.1311e-07	0.482016	0.0226203	0.0226203	0.00724692	-0.19715	1.84025	0.0952	0.0986	0.0986	1.8912	BRD-K58435339	AT-13387
CTSB	A375	8.19285e-07	0.102655	0.00108114	0.00108114	0.0242767	-0.1133	-1.4403	-1.2124	-1.2124	-1.2124	-1.79985	BRD-K55250441	sulfadoxine
CTSB	A375	8.2837e-07	0.0103019	0.00599745	0.00599745	0.0420111	-0.1133	-1.44875	-1.5489	-1.2784	-1.2784	-0.7781	BRD-A01787639	naftopidil
CTSB	MCF7	8.5325e-07	0.0773364	0.091785	0.091785	0.00437463	-0.2102	1.8995	0.4931	0.4634	0.4634	2.8501	BRD-K77987382	mebendazole
CTSB	MCF7	8.53836e-07	0.332018	0.0668492	0.126763	0.198066	-0.2102	0.6969	0.2455	0.31415	0.2455	0.2455	BRD-K08109215	I-BET-762
CTSB	A375	8.60374e-07	0.0775648	0.123801	0.123801	0.000487736	-0.1133	0.8666	0.5985	0.18035	0.18035	2.18765	BRD-K33379087	tivantinib
CTSB	A375	8.62553e-07	0.00503733	0.0101793	0.0101793	0.00300418	-0.1133	1.58645	1.57	0.8171	0.8171	2.4166	BRD-A60245366	AS-601245
CTSB	HCC515	8.83528e-07	0.00292601	0.00332822	0.00332822	0.00287416	-0.4432	2.28845	3.202	1.8441	1.8441	3.8516	BRD-U07805514	saracatinib
CTSB	MCF7	9.2516e-07	0.0263188	0.000778442	0.000778442	0.0154845	-0.2102	0.9739	0.7736	0.9395	0.9395	1.2153	BRD-K33127281	adapalene
CTSB	HT29	9.25399e-07	0.00811527	0.000189217	0.000189217	0.0259289	-0.19715	0.9905	1.7203	0.8098	0.8098	1.1712	BRD-K11399644	phenformin
CTSB	PC3	9.58088e-07	0.114551	0.0969459	0.0969459	9.95619e-05	-0.0636	0.9306	0.7296	0.1362	0.1362	1.79615	BRD-A19500257	geldanamycin
CTSB	HT29	9.93983e-07	NA	NA	NA	NA	-0.19715	3.1925	NA	NA	NA	NA	BRD-A61304759	tanespimycin
CTSB	HEPG2	1.00406e-06	0.00496669	0.000409778	0.000409778	0.122171	-0.2475	0.7454	1.1325	0.6745	0.6745	0.3844	BRD-K99545815	PF-562271
CTSB	HA1E	1.02471e-06	0.00349161	0.0360767	0.0360767	0.0035696	-0.0725	2.1422	3.1185	2.4589	2.4589	2.4907	BRD-K29968218	KX2-391
CTSB	HEPG2	1.04891e-06	0.0224719	0.00124966	0.00124966	0.012046	-0.2475	0.7348	0.8414	0.8414	0.8414	0.6282	BRD-K09991945	GSK-3-inhibitor-II
CTSB	PC3	1.05795e-06	0.0206761	0.0331541	0.0331541	0.00425549	-0.0636	1.50105	1.0041	0.5119	0.5119	2.4099	BRD-K00152668	adarotene
CTSB	A375	1.06336e-06	0.0755428	0.0105076	0.0105076	0.00884584	-0.1133	0.84195	0.8982	0.6745	0.6745	1.4991	BRD-K19761926	eplerenone
CTSB	PC3	1.08498e-06	0.0497336	0.104622	0.104622	0.016565	-0.0636	0.5727	0.47115	0.3281	0.3281	1.1825	BRD-K85606544	neratinib
CTSB	A375	1.0873e-06	0.0029661	0.0804718	0.0804718	0.0029098	-0.1133	3.17045	2.7459	0.4958	0.4958	3.6949	BRD-K62627508	idasanutlin
CTSB	MCF7	1.09626e-06	0.0125862	0.0743698	0.0743698	0.00343315	-0.2102	1.381	1.0544	0.5393	0.5393	2.0902	BRD-K63750851	mycophenolic-acid
CTSB	HEPG2	1.13828e-06	0.260012	0.0376495	0.0376495	0.00318831	-0.2475	0.9673	0.0968	0.1256	0.1256	1.9719	BRD-U07805514	saracatinib
CTSB	A375	1.1408e-06	0.00476841	4.20779e-05	4.20779e-05	0.0323365	-0.1133	-1.4528	-2.1504	-1.62295	-1.62295	-1.1597	BRD-K23082237	butaclamol
CTSB	HT29	1.14531e-06	0.0736094	0.0141236	0.0141236	0.0382067	-0.19715	1.14395	0.612	0.612	0.612	1.1243	BRD-K42436189	AZ-20
CTSB	A375	1.15862e-06	0.00661837	0.000179146	0.000179146	0.43306	-0.1133	1.03035	1.2033	0.9807	0.9807	0	BRD-A31159102	fluoxetine
CTSB	HT29	1.19277e-06	0.0129666	1.07086e-05	1.07086e-05	0.133358	-0.19715	1.1744	1.3859	1.3859	1.3859	0.316	BRD-K07798980	PSI-6130
CTSB	A375	1.20123e-06	0.0625239	0.0141945	0.0141945	0.0173439	-0.1133	0.9204	0.7841	0.627	0.627	1.4074	BRD-K68174511	torin-2
CTSB	A375	1.2123e-06	0.129273	0.0160855	0.0160855	0.0231439	-0.1133	0.9184	0.5529	0.3225	0.3225	1.265	BRD-K42898655	temsirolimus
CTSB	MCF7	1.21966e-06	0.106159	0.00056695	0.00056695	0.121612	-0.2102	2.42885	2.4767	2.381	2.381	2.2224	BRD-K29968218	KX2-391
CTSB	A375	1.23076e-06	0.00938052	5.26215e-06	5.26215e-06	0.530546	-0.1133	-1.6451	-1.9259	-1.8896	-1.8896	-0.0884	BRD-K33106058	cytarabine
CTSB	A375	1.26233e-06	0.0458087	0.00951886	0.00951886	0.035253	-0.1133	0.8291	0.5932	0.4863	0.4863	3.6711	BRD-K14619660	altrenogest
CTSB	HT29	1.28562e-06	0.232231	0.182936	0.182936	0.0137408	-0.19715	0.43365	0.151	0.09965	0.09965	0.7417	BRD-K08799216	pelitinib
CTSB	HEPG2	1.29413e-06	0.339923	0.0504872	0.0504872	0.00963243	-0.2475	0.9314	0.3198	0.25805	0.25805	0.8405	BRD-U64521890	XMD-16144
CTSB	PC3	1.30484e-06	0.781461	0.101558	0.101558	0.0763152	-0.0636	0.8606	-0.0787	0.2524	0.2524	0.5222	BRD-K77908580	entinostat
CTSB	MCF7	1.31113e-06	0.256342	0.947314	0.947314	0.000226455	-0.2102	0.3453	0.1198	-0.1747	-0.1747	0.9426	BRD-K03449891	foretinib
CTSB	A375	1.32829e-06	0.0128778	0.0165391	0.0165391	0.0648575	-0.1133	0.9859	1.0829	0.4186	0.4186	0.4186	BRD-K89208535	indacaterol
CTSB	A375	1.33224e-06	0.00540904	0.0561572	0.0561572	0.0084233	-0.1133	1.17235	1.1809	0.1516	0.1516	0.917	BRD-K18961567	LY-2801653
CTSB	A375	1.37842e-06	0.00586654	0.000594649	0.000594649	0.120837	-0.1133	0.9126	1.2741	1.0239	1.0239	1.0239	BRD-K49404994	levetiracetam
CTSB	MCF7	1.3867e-06	0.0254465	0.000178356	0.000178356	0.121612	-0.2102	0.65355	0.5483	0.6806	0.6806	0.4705	BRD-K19061412	mubritinib
CTSB	HT29	1.39382e-06	0.00862718	0.000162489	0.000162489	0.00807977	-0.19715	1.16135	1.9861	1.2265	1.2265	1.8283	BRD-K81332461	maxacalcitol
CTSB	HT29	1.39664e-06	0.0706364	0.0020788	0.0020788	0.0378401	-0.19715	0.90815	0.9669	0.9669	0.9669	0.7339	BRD-K11717138	benzbromarone
CTSB	HT29	1.41377e-06	0.151631	0.00138237	0.00138237	0.329413	-0.19715	0.9852	0.5941	0.9404	0.9404	0.4294	BRD-A73741725	exemestane
CTSB	A375	1.4241e-06	0.126939	0.000694649	0.000694649	0.166491	-0.1133	0.7922	0.5423	0.7922	0.7922	0.53535	BRD-K67121414	apixaban
CTSB	A375	1.43605e-06	0.0069181	3.99052e-05	3.99052e-05	0.0099862	-0.1133	-1.2942	-1.6567	-1.4914	-1.4914	-1.2942	BRD-A84045418	calpeptin
CTSB	HT29	1.51383e-06	0.114892	0.0092163	0.0092163	0.00501867	-0.19715	1.1081	1.0386	0.788	0.788	2.7817	BRD-A30051119	amikacin
CTSB	A375	1.54461e-06	0.56162	0.0170434	0.0170434	0.0818742	-0.1133	1.1964	0.3762	0.8481	0.8481	0.5894	BRD-K31519811	PF-02545920
CTSB	HCC515	1.54521e-06	0.625775	0.004976	0.004976	0.0152054	-0.4432	0.4588	0.1776	0.2593	0.2593	0.8025	BRD-K68065987	MK-2206
CTSB	A375	1.60089e-06	0.111618	0.0755135	0.0755135	0.00406294	-0.1133	-1.7265	-1.0816	-0.8155	-0.8155	-2.061	BRD-K23248433	camicinal
CTSB	A375	1.60248e-06	0.00679677	0.00198077	0.00198077	0.00898656	-0.1133	-1.35685	-1.3667	-1.2949	-1.2949	-1.8638	BRD-K36280065	tofacitinib
CTSB	A375	1.63148e-06	0.00853336	0.00718146	0.00718146	0.0186288	-0.1133	-1.1018	-1.5508	-1.0047	-1.0047	-1.0691	BRD-K68232650	lacosamide
CTSB	A375	1.6475e-06	0.18749	0.0073039	0.0073039	0.066158	-0.1133	0.8318	0.4683	0.5934	0.5934	0.7649	BRD-A29901043	KIN001-127
CTSB	HT29	1.65958e-06	0.00989297	0.00916283	0.00916283	0.00966883	-0.19715	1.8327	2.0352	1.6188	1.6188	2.6284	BRD-K29968218	KX2-391
CTSB	HEPG2	1.683e-06	0.0520002	0.000128334	0.000128334	0.0189269	-0.2475	0.44715	0.7525	0.3467	0.3467	1.48555	BRD-K79090631	CGP-60474
CTSB	A375	1.68915e-06	0.0194544	0.0763534	0.0763534	0.00444372	-0.1133	-1.7221	-1.0987	-0.7146	-0.7146	-1.7461	BRD-K99023089	AZD-5363
CTSB	A375	1.69593e-06	0.0165311	0.0090525	0.0090525	0.00735821	-0.1133	1.201	1.0009	0.5256	0.5256	1.8616	BRD-K75958547	pitavastatin
CTSB	A375	1.71965e-06	0.0155832	0.000186545	0.000186545	0.0622013	-0.1133	-1.18575	-1.3269	-1.2438	-1.2438	-1.1277	BRD-K29653726	topiramate
CTSB	HA1E	1.72919e-06	0.0176189	0.089291	0.089291	0.00402132	-0.0725	1.58565	1.4979	0.3868	0.3868	3.0738	BRD-K37890730	camptothecin
CTSB	HCC515	1.73387e-06	0.139011	0.0364803	0.0364803	0.0122741	-0.4432	0.7274	0.1637	0.09	0.09	0.5386	BRD-U64521890	XMD-16144
CTSB	PC3	1.76961e-06	0.00399489	7.53324e-05	7.53324e-05	0.0676113	-0.0636	-1.6885	-2.8624	-2.0296	-2.0296	-1.551	BRD-K19061412	mubritinib
CTSB	MCF7	1.79408e-06	0.169043	0.00128347	0.00128347	0.00683947	-0.2102	0.8676	1.1926	0.8958	0.8958	1.1625	BRD-K76841105	tazarotene
CTSB	A375	1.80166e-06	0.0437215	0.000840406	0.000840406	0.160382	-0.1133	-1.05255	-0.9782	-0.976	-0.976	-1.4414	BRD-K35189033	levonorgestrel
CTSB	A375	1.87159e-06	0.0063492	3.44828e-05	3.44828e-05	0.0402621	-0.1133	-1.2987	-1.5296	-1.4284	-1.4284	-0.7907	BRD-K24496482	SB-590885
CTSB	MCF7	1.88284e-06	0.0192784	0.0193055	0.0193055	0.00766064	-0.2102	0.81145	0.7393	0.5815	0.5815	1.0464	BRD-K31928526	barasertib
CTSB	PC3	1.8839e-06	0.0104154	7.73566e-05	7.73566e-05	0.0236436	-0.0636	0.9979	1.1856	1.1136	1.1136	1.3477	BRD-K63712959	temoporfin
CTSB	A375	1.89115e-06	0.00334634	3.55576e-07	3.55576e-07	0.00313105	-0.1133	-3.15795	-3.1694	-3.2956	-3.2956	-5.4619	BRD-K78055238	LY-2090314
CTSB	PC3	1.89151e-06	0.0202414	0.000825863	0.000825863	0.0894788	-0.0636	1.1828	1.2076	1.2076	1.2076	0.5776	BRD-K00673382	famotidine
CTSB	A549	1.97795e-06	0.259232	6.44408e-05	6.44408e-05	0.382846	0	0.61445	0.50575	0.6745	0.6745	0.3514	BRD-K16485616	mocetinostat
CTSB	PC3	2.06113e-06	0.0028496	0.000472631	0.000472631	0.00283104	-0.0636	1.2953	3.1772	1.2953	1.2953	3.3578	BRD-K12867552	PCI-24781
CTSB	HA1E	2.06137e-06	0.0246052	0.0589742	0.0589742	0.00818841	-0.0725	1.0608	0.9991	0.1553	0.1553	1.2617	BRD-K48488978	YM-201636
CTSB	A375	2.07969e-06	0.200398	0.000349413	0.000349413	0.0157096	-0.1133	-1.10435	-1.014	-1.014	-1.014	-1.3951	BRD-K33483813	actarit
CTSB	MCF7	2.11687e-06	0.0385445	0.000419801	0.000419801	0.163112	-0.2102	2.8478	2.9328	2.4808	2.4808	2.7926	BRD-A28746609	paclitaxel
CTSB	HA1E	2.12553e-06	0.0199509	0.0193102	0.0193102	0.00812908	-0.0725	1.2447	0.7346	0.7674	0.7674	1.2882	BRD-A56085258	LGX-818
CTSB	HA1E	2.13651e-06	0.0131445	0.000892503	3.72306e-05	0.00490606	-0.0725	1.2124	1.3624	1.18265	1.2124	1.3592	BRD-K62277907	sarsagenin
CTSB	HT29	2.14475e-06	0.0311122	0.00255547	0.00255547	0.038949	-0.19715	1.2778	0.6723	0.95145	0.95145	0.5502	BRD-A14886633	norgestrel
CTSB	MCF7	2.15948e-06	0.00386968	0.121577	0.121577	0.00288523	-0.2102	2.52265	1.8873	0.2747	0.2747	3.5359	BRD-K71281111	SNX-2112
CTSB	A375	2.17099e-06	0.089273	0.00483714	0.00483714	0.0132733	-0.1133	-1.1812	-1.2288	-0.9814	-0.9814	-1.2288	BRD-K35719256	rotundine
CTSB	HEPG2	2.20431e-06	0.00480327	8.27743e-07	8.27743e-07	0.105019	-0.2475	0.927	1.3216	1.3216	1.3216	0.6161	BRD-K09951645	dabrafenib
CTSB	HCC515	2.21374e-06	0.0139874	0.0386404	0.0386404	0.0134628	-0.4432	0.50685	0.5878	0.2897	0.2897	0.4259	BRD-K03449891	foretinib
CTSB	A375	2.24914e-06	0.0482564	0.000504432	0.000504432	0.142644	-0.1133	-0.8894	-0.7819	-1.3078	-1.3078	-0.584	BRD-K15010214	emedastine
CTSB	A375	2.26902e-06	0.139075	0.0153064	0.0153064	0.0242951	-0.1133	0.91585	0.7636	0.7518	0.7518	0.881	BRD-K42098891	protriptyline
CTSB	MCF7	2.32131e-06	0.00264735	0.0064734	0.0064734	0.000245392	-0.2102	0.5574	0.6745	0.49345	0.49345	1.4792	BRD-A60245366	AS-601245
CTSB	A375	2.34373e-06	0.0427585	0.00679615	0.00679615	0.144253	-0.1133	-1.3566	-0.9937	-0.9937	-0.9937	-0.4858	BRD-K19061412	mubritinib
CTSB	A375	2.38076e-06	0.0147834	0.00919552	0.00919552	0.118854	-0.1133	0.88055	1.0826	0.7937	0.7937	0.6462	BRD-K50564936	E-2012
CTSB	A375	2.39382e-06	0.0906659	0.000242347	0.000242347	0.143045	-0.1133	0.545	0.6684	0.7994	0.7994	0.3804	BRD-K73440166	cinaciguat
CTSB	HEPG2	2.39921e-06	0.266898	0.000168839	0.000168839	0.00412649	-0.2475	1.03945	0.6264	1.0609	1.0609	1.5545	BRD-K68191783	ALW-II-38-3
CTSB	A375	2.41464e-06	0.0850802	5.03691e-06	5.03691e-06	NA	-0.1133	6.9955	3.6579	6.9955	6.9955	NA	BRD-K15179879	carfilzomib
CTSB	HEPG2	2.42471e-06	0.00297335	0.0596864	0.0596864	0.0105733	-0.2475	1.80025	1.8948	1.6024	1.6024	2.1827	BRD-K92571446	WZ-3105
CTSB	HA1E	2.43159e-06	0.00555186	6.18947e-06	6.18947e-06	0.00514609	-0.0725	-2.0703	-2.2267	-2.0703	-2.0703	-4.3409	BRD-K61397605	romidepsin
CTSB	A375	2.49768e-06	0.596683	0.0537987	0.0537987	0.0227028	-0.1133	0.87145	0.1371	0.4506	0.4506	0.8263	BRD-K34776109	glimepiride
CTSB	HA1E	2.52529e-06	0.00875277	0.0795439	0.0795439	0.00998678	-0.0725	1.26035	1.2213	0.7568	0.7568	1.1324	BRD-K72951360	valrubicin
CTSB	A375	2.57197e-06	0.136218	0.018495	0.018495	0.0160941	-0.1133	-1.3478	-0.4333	-0.6762	-0.6762	-1.7228	BRD-K56032964	AP-26113
CTSB	HCC515	2.58802e-06	0.639425	0.0984937	0.0984937	0.00349346	-0.4432	0.8077	-0.1405	-0.1405	-0.1405	1.356	BRD-K72414522	AZD-5438
CTSB	A375	2.62011e-06	0.0302215	0.00396113	0.00396113	0.00762083	-0.1133	0.97865	0.7895	0.6285	0.6285	1.015	BRD-K42728290	NVP-BGJ398
CTSB	PC3	2.6825e-06	0.0734366	0.00432226	0.00432226	0.0149418	-0.0636	-1.32395	-0.9653	-0.7258	-0.7258	-1.5609	BRD-A62025033	temsirolimus
CTSB	MCF7	2.68295e-06	9.23221e-05	0.00140287	0.00140287	0.00457123	-0.2102	0.37235	0.6745	0.4605	0.4605	0.3899	BRD-K79090631	CGP-60474
CTSB	MCF7	2.71752e-06	0.057731	0.0581784	0.0581784	0.102631	-0.2102	0.88005	0.88005	0.3965	0.3965	1.5767	BRD-K54256913	MK-1775
CTSB	PC3	2.73635e-06	0.142031	0.0021739	0.0021739	0.076044	-0.0636	0.71495	0.4366	0.6745	0.6745	0.646	BRD-U07805514	saracatinib
CTSB	MCF7	2.80909e-06	0.00332039	0.139137	0.139137	0.00285143	-0.2102	2.36535	1.8586	0.405	0.405	3.5973	BRD-K62627508	idasanutlin
CTSB	HA1E	2.83735e-06	0.104687	0.000790711	0.000790711	0.0512576	-0.0725	-1.05935	-0.6825	-1.1106	-1.1106	-0.954	BRD-K01192156	tyrphostin-AG-112
CTSB	MCF7	2.85886e-06	0.00517914	0.000378526	0.000378526	0.247837	-0.2102	0.9432	1.8328	0.8669	0.8669	0.6674	BRD-K60997853	PHA-848125
CTSB	HA1E	2.86239e-06	0.513722	0.0928196	0.0928196	0.00351373	-0.0725	1.4491	0.3765	0.4011	0.4011	2.2551	BRD-K53665955	MK-5108
CTSB	MCF7	2.89851e-06	0.0759848	0.0130994	0.0130994	0.0100602	-0.2102	1.31785	1.5565	1.5565	1.5565	1.2703	BRD-K00494077	trovafloxacin
CTSB	MCF7	2.9089e-06	0.149163	0.000486571	0.000486571	0.510185	-0.2102	1.0378	1.4358	1.4285	1.4285	0.1215	BRD-K04112579	nepafenac
CTSB	HT29	2.92243e-06	0.153472	0.0116725	0.0116725	0.0130749	-0.19715	1.1426	0.2337	0.4048	0.4048	1.1426	BRD-A14941520	dofequidar
CTSB	A375	2.95936e-06	0.0300154	0.130968	0.130968	0.00491616	-0.1133	-1.5675	-1.45305	-0.4632	-0.4632	-1.7779	BRD-K12343256	trametinib
CTSB	HCC515	2.97459e-06	0.0185988	0.0991347	0.0991347	0.00287416	-0.4432	1.27995	1.3521	-0.1438	-0.1438	4.0111	BRD-A60245366	AS-601245
CTSB	HCC515	2.99054e-06	0.0497991	0.00425256	0.00425256	0.146478	-0.4432	0.30285	0.2741	0.1977	0.1977	0.3191	BRD-K92723993	imatinib
CTSB	A375	2.99705e-06	0.0493225	0.0208839	0.0208839	0.0615999	-0.1133	0.9265	0.562	0.4506	0.4506	0.9333	BRD-K31309378	lucitanib
CTSB	HA1E	3.03665e-06	0.503474	0.112927	0.112927	0.025358	-0.0725	-0.77775	-0.6006	-0.46975	-0.46975	-0.85495	BRD-K57080016	selumetinib
CTSB	HEPG2	3.05611e-06	0.0147601	0.00873697	0.00873697	0.203541	-0.2475	0.63635	0.6372	0.587	0.587	0.438	BRD-K24515980	QL-XI-92
CTSB	A375	3.082e-06	0.247651	0.00521181	0.00521181	0.013811	-0.1133	0.7522	0.3657	0.69395	0.69395	1.0735	BRD-K24219278	amineptine
CTSB	A375	3.10301e-06	0.0634481	0.000448534	0.000448534	0.00554947	-0.1133	0.94295	0.9138	0.9138	0.9138	1.3666	BRD-K93779381	ingenol-mebutate
CTSB	A375	3.10581e-06	0.0595032	0.00794436	0.00794436	0.0547676	-0.1133	0.66305	0.5753	0.5753	0.5753	0.6199	BRD-A83081521	finasteride
CTSB	A375	3.12222e-06	0.00276441	2.40741e-07	2.40741e-07	0.222447	-0.1133	3.3707	7.1559	4.5929	4.5929	0.2156	BRD-K22848513	bardoxolone-methyl
CTSB	HCC515	3.1512e-06	0.00361832	0.0018521	0.0018521	0.00287416	-0.4432	1.0767	2.1982	0.8505	0.8505	2.6509	BRD-K48488978	YM-201636
CTSB	HEPG2	3.16754e-06	0.0882988	0.0072467	0.0072467	0.150378	-0.2475	0.8012	0.59905	0.5357	0.5357	0.8767	BRD-U70626184	BI-2536
CTSB	HT29	3.18545e-06	0.0225993	0.0796767	0.0796767	0.0117268	-0.19715	1.4143	0.9684	0.7837	0.7837	2.0424	BRD-K72951360	valrubicin
CTSB	MCF7	3.22343e-06	0.0110448	0.0144472	0.0144472	0.205952	-0.2102	1.45765	1.2234	0.545	0.545	1.7096	BRD-K86118762	linsitinib
CTSB	A375	3.26647e-06	0.0685689	0.00489274	0.00489274	0.545097	-0.1133	0.86125	0.8468	0.4898	0.4898	0.0294	BRD-K87782578	AVL-292
CTSB	A549	3.32462e-06	0.636588	0.354801	0.354801	0.00647609	0	0.75795	0.33875	0.24755	0.24755	0.80715	BRD-K14109347	LY-2603618
CTSB	PC3	3.33488e-06	0.766579	0.0930867	0.0930867	0.00303153	-0.0636	1.1023	-0.4694	0.5987	0.5987	2.9866	BRD-K35960502	niclosamide
CTSB	HA1E	3.35126e-06	0.0112148	0.121912	0.121912	0.00448265	-0.0725	1.5417	1.3406	0.2189	0.2189	1.7955	BRD-U61997977	WZ-4-145
CTSB	A375	3.35282e-06	0.125845	0.00136816	0.00136816	0.0922656	-0.1133	0.88	0.5304	0.727	0.727	1.6318	BRD-A96754982	tacrolimus
CTSB	A375	3.3887e-06	0.110402	0.000550641	0.000550641	0.118506	-0.1133	-1.0121	-0.6808	-1.03405	-1.03405	-0.58505	BRD-K53972329	ruxolitinib
CTSB	A375	3.49827e-06	0.15806	0.00683673	0.00683673	0.0983925	-0.1133	0.8718	0.4062	0.5389	0.5389	0.9207	BRD-K29968218	KX2-391
CTSB	A549	3.50236e-06	0.000340408	8.31951e-07	8.31951e-07	0.00030166	0	-1.0026	-2.3033	-1.1167	-1.1167	-1.5257	BRD-K26838195	AST-1306
CTSB	A375	3.56979e-06	0.0216737	0.075282	0.075282	0.00788036	-0.1133	0.83535	0.7716	0.3399	0.3399	1.2099	BRD-K62196610	AVN-944
CTSB	HCC515	3.6215e-06	0.00510931	0.0205635	0.0205635	0.0239717	-0.4432	0.63585	1.1122	0.8708	0.8708	0.512	BRD-K77908580	entinostat
CTSB	MCF7	3.73175e-06	0.00296263	0.00622547	0.00622547	0.00273594	-0.2102	2.72145	3.4952	0.6605	0.6605	7.4512	BRD-K22848513	bardoxolone-methyl
CTSB	HA1E	3.78221e-06	0.0269589	0.0394499	0.0394499	0.0276462	-0.0725	0.957	1.1224	0.424	0.424	0.7916	BRD-K13566078	BMS-345541
CTSB	MCF7	3.81912e-06	0.003369	0.0393236	0.0393236	0.00383651	-0.2102	1.7907	2.5555	1.885	1.885	1.9109	BRD-K55187425	rigosertib
CTSB	A549	3.82461e-06	0.0189915	0.00633435	0.00633435	0.0181959	0	0.66135	0.7963	0.6482	0.6482	1.003	BRD-K29395450	PIK-93
CTSB	HT29	3.89919e-06	0.0166086	0.00768207	0.00768207	0.136323	-0.19715	0.9942	1.7993	0.6221	0.6221	0.388	BRD-K28456624	seocalcitol
CTSB	A375	3.9382e-06	0.00414561	0.000170036	0.000170036	0.127183	-0.1133	0.9269	1.487	1.3389	1.3389	0.4993	BRD-K83699324	NMS-1286937
CTSB	HT29	4.01012e-06	0.00936804	0.00555226	0.00555226	0.0475104	-0.19715	0.8895	3.2677	0.798	0.798	0.8424	BRD-K75295174	alisertib
CTSB	PC3	4.06144e-06	0.0191311	0.00121762	0.00121762	0.00611346	-0.0636	1.7396	2.12675	1.38655	1.38655	1.7552	BRD-K23499943	alvespimycin
CTSB	A549	4.09446e-06	0.00283029	0.00072834	0.00072834	0.00289641	0	1.60535	3.1547	1.0804	1.0804	2.9104	BRD-K48488978	YM-201636
CTSB	A549	4.09948e-06	0.0422737	0.0942632	0.0942632	0.0351332	0	0.6745	0.8701	0.2761	0.2761	0.63275	BRD-K47983010	BX-795
CTSB	HT29	4.10818e-06	0.301555	0.0464531	0.0464531	0.0498825	-0.19715	1.2508	0.7467	0.6734	0.6734	0.9334	BRD-K61443650	thiomersal
CTSB	HT29	4.14622e-06	0.166088	0.00407169	0.00407169	0.0776754	-0.19715	-1.1635	-0.6583	-0.934	-0.934	-1.37475	BRD-K60237333	niacin
CTSB	MCF7	4.22351e-06	0.0124746	0.00140489	0.00140489	0.104607	-0.2102	0.71205	1.0922	0.6745	0.6745	0.3961	BRD-K49685476	TTNPB
CTSB	HEPG2	4.28481e-06	0.00398837	9.61027e-07	9.61027e-07	0.137125	-0.2475	0.8475	1.4539	1.4539	1.4539	0.6355	BRD-K67578145	GDC-0879
CTSB	HT29	4.374e-06	0.00800671	0.000437239	2.88417e-05	0.0224242	-0.19715	1.13595	1.2065	1.0433	1.06155	1.3332	BRD-K68552125	phorbol-myristate-acetate
CTSB	HA1E	4.38412e-06	NA	NA	NA	NA	-0.0725	2.43725	NA	NA	NA	NA	BRD-A61304759	tanespimycin
CTSB	HEPG2	4.45124e-06	0.0328064	0.00986272	0.00986272	0.00335872	-0.2475	0.9622	0.8137	0.1904	0.1904	1.6072	BRD-K44227013	ponatinib
CTSB	HA1E	4.64116e-06	0.0257017	0.00627665	0.00627665	0.000167096	-0.0725	-1.1279	-0.9378	-0.69055	-0.69055	-2.0545	BRD-K08109215	I-BET-762
CTSB	A375	4.65047e-06	0.0121854	0.0052113	0.0052113	0.00367732	-0.1133	1.19855	1.3651	0.6428	0.6428	1.8049	BRD-K71164191	KD-023
CTSB	HA1E	4.70869e-06	0.00834451	1.72386e-05	1.72386e-05	0.4819	-0.0725	1.0091	1.258	1.258	1.258	0.1696	BRD-A50675702	fipronil
CTSB	A549	4.71833e-06	0.00359899	0.00417383	0.00417383	0.0315546	0	-0.7956	-1.145	-0.8762	-0.8762	-0.3809	BRD-K64857848	XMD-885
CTSB	HT29	4.78439e-06	0.276479	0.24097	0.24097	0.0132017	-0.19715	0.5031	0.0355	0	0	0.87885	BRD-K03449891	foretinib
CTSB	PC3	4.79677e-06	0.421051	0.127284	0.127284	0.00722783	-0.0636	1.1844	0.0518	0.2331	0.2331	1.3271	BRD-K41213548	KW-2478
CTSB	MCF7	4.81425e-06	0.375194	0.0194945	0.0194945	0.0172798	-0.2102	0.9577	-0.168	0.6034	0.6034	1.1189	BRD-A04352665	maraviroc
CTSB	A375	4.8863e-06	0.00601763	0.000457187	0.000457187	0.146828	-0.1133	0.60905	1.3184	0.9099	0.9099	0.4994	BRD-K36627727	tamibarotene
CTSB	PC3	4.96895e-06	0.0211469	0.0124855	0.0124855	0.330298	-0.0636	1.41135	1.3763	0.4135	0.4135	0.7255	BRD-K56844688	epirubicin
CTSB	MCF7	5.11151e-06	0.29259	0.98404	0.98404	0.00175402	-0.2102	1.4136	0.31235	-0.43825	-0.43825	1.6594	BRD-K33379087	tivantinib
CTSB	HA1E	5.11657e-06	0.388844	0.0183772	0.0183772	0.00434617	-0.0725	-1.1249	-0.3435	-0.8742	-0.8742	-3.0113	BRD-K55013654	lorcaserin
CTSB	MCF7	5.13595e-06	0.0121708	0.00141441	0.00141441	0.224727	-0.2102	0.3774	0.6219	0.3833	0.3833	0.46265	BRD-K79254416	decitabine
CTSB	HA1E	5.20013e-06	0.0400389	0.00227408	0.00198258	0.365454	-0.0725	1.131	0.8812	1.1669	1.131	0.5955	BRD-K68552125	phorbol-myristate-acetate
CTSB	HA1E	5.20808e-06	0.00514609	0.0136948	0.0136948	0.00310453	-0.0725	1.7956	1.7307	1.1613	1.1613	2.8241	BRD-K99475619	genz-644282
CTSB	A375	5.24214e-06	0.0255924	0.000553871	0.000553871	0.0931216	-0.1133	0.8061	0.6745	0.8945	0.8945	0.5823	BRD-K54028654	trehalose
CTSB	HA1E	5.35079e-06	0.0227818	0.00146063	0.00146063	0.0136988	-0.0725	0.65705	1.2357	0.619	0.619	1.1185	BRD-K43723251	chenodiol
CTSB	A375	5.38785e-06	0.223562	0.0375119	0.0375119	0.0749808	-0.1133	0.9787	0	0.2995	0.2995	0.3237	BRD-K34022604	clofarabine
CTSB	A375	5.48062e-06	0.0140582	0.0383224	0.0383224	0.0657155	-0.1133	0.85755	0.7981	0.3563	0.3563	1.0027	BRD-K21548250	moracizine
CTSB	A375	5.4858e-06	0.0544593	0.0154739	0.0154739	0.0800833	-0.1133	0.7504	0.6428	0.562	0.562	1.5118	BRD-K36386086	dolutegravir
CTSB	A375	5.67058e-06	0.0108073	0.110367	0.110367	0.00393866	-0.1133	1.1536	0.9329	0.3514	0.3514	1.6426	BRD-K68346641	amsacrine
CTSB	PC3	5.752e-06	0.01833	0.000375248	0.000375248	0.196644	-0.0636	1.8743	2.0236	2.0236	2.0236	0.9608	BRD-K68532323	SB-743921
CTSB	HT29	5.78508e-06	0.120803	0.0382556	0.0382556	0.152238	-0.19715	0.42	0.08195	0.1541	0.1541	0.4979	BRD-K11153516	iniparib
CTSB	A375	5.81604e-06	0.0384375	0.0889314	0.0889314	0.0171454	-0.1133	1.0036	0.8539	0.2975	0.2975	1.9461	BRD-K96194081	cepharanthine
CTSB	HA1E	5.98337e-06	0.0130739	0.0383781	0.0383781	0.167757	-0.0725	0.81015	1.3807	0.4717	0.4717	0.5213	BRD-K70511574	HMN-214
CTSB	A549	6.15877e-06	0.0127511	0.000301373	0.000301373	0.210747	0	0.6869	0.967	0.8313	0.8313	0.6745	BRD-K64890080	BI-2536
CTSB	A549	6.15984e-06	0.904324	0.177925	0.177925	0.00372276	0	1.41155	-0.4079	0.2198	0.2198	1.8226	BRD-K68065987	MK-2206
CTSB	A375	6.23134e-06	0.0185798	0.122724	0.122724	0.00465312	-0.1133	1.3422	1.1999	0.331	0.331	1.5575	BRD-A89585551	mefloquine
CTSB	HT29	6.24819e-06	0.0337517	7.47697e-05	7.47697e-05	0.405958	-0.19715	1.24055	0.7642	1.1729	1.1729	0.4042	BRD-K15108141	gemcitabine
CTSB	HA1E	6.25579e-06	0.103847	0.0193837	0.0193837	0.0208584	-0.0725	-1.3272	-0.5568	-0.5568	-0.5568	-1.2144	BRD-K56032964	AP-26113
CTSB	HCC515	6.27558e-06	0.354421	0.0603617	0.0603617	0.0113556	-0.4432	0.7513	0.0119	0.0119	0.0119	0.9867	BRD-K83452553	daminozide
CTSB	MCF7	6.36176e-06	0.0365579	0.00103049	0.00103049	0.0868548	-0.2102	-1.06955	-1.2569	-1.208	-1.208	-1.2327	BRD-A15202882	milnacipran
CTSB	A375	6.37362e-06	0.1001	0.000218868	0.000218868	0.996481	-0.1133	-0.9573	-0.6745	-1.4381	-1.4381	-0.2045	BRD-K29582115	ziprasidone
CTSB	A375	6.38337e-06	0.214714	0.0115755	0.0115755	0.0232926	-0.1133	0.7678	0.46735	0.4137	0.4137	0.7678	BRD-A92800748	tie2-kinase-inhibitor
CTSB	HA1E	6.43611e-06	0.0639243	0.305857	0.305857	0.215875	-0.0725	0.6373	0.777	0	0	0.31385	BRD-K99545815	PF-562271
CTSB	A375	7.03345e-06	0.0184334	0.000242636	0.000242636	0.0062369	-0.1133	-1.24585	-1.7838	-1.1597	-1.1597	-1.6495	BRD-K22936972	diphenylpyraline
CTSB	A375	7.08632e-06	0.00506804	1.30065e-05	1.30065e-05	0.0341601	-0.1133	-1.52805	-1.7807	-1.5992	-1.5992	-1.1696	BRD-K62965247	tipifarnib-P2
CTSB	MCF7	7.10548e-06	0.180359	0.0034017	0.0034017	0.0117179	-0.2102	0.51305	0.4261	0.4261	0.4261	1.0516	BRD-K28936863	ketotifen
CTSB	A549	7.21172e-06	0.0170301	0.000775936	0.000775936	0.0003548	0	-0.7575	-0.7833	-0.78575	-0.78575	-1.28105	BRD-K12787259	CX-5461
CTSB	HA1E	7.49657e-06	0.423436	0.833392	0.833392	4.30721e-05	-0.0725	0.8347	0.2476	0	0	2.8578	BRD-K33379087	tivantinib
CTSB	A375	7.63629e-06	0.0207662	0.0213895	0.0213895	0.024357	-0.1133	0.82955	0.9846	0.3848	0.3848	1.283	BRD-K26341917	L-ergothioneine
CTSB	A549	7.65054e-06	0.0629374	0.0115055	0.0115055	0.028386	0	-0.6658	-1.0618	-0.3489	-0.3489	-0.8425	BRD-K15592317	CP-466722
CTSB	A375	7.6735e-06	0.00477571	0.000477445	0.000477445	0.196841	-0.1133	-1.4969	-2.1366	-1.54145	-1.54145	-0.6309	BRD-K43457670	acetazolamide
CTSB	A375	7.78474e-06	0.0912279	0.000355188	0.000355188	0.0240487	-0.1133	-1.1437	-0.8347	-1.32565	-1.32565	-1.1437	BRD-K42948882	AMD-11070
CTSB	PC3	7.83994e-06	0.00508493	0.000249933	0.000249933	0.0452845	-0.0636	-2.1464	-2.2196	-1.8902	-1.8902	-2.6337	BRD-K52233191	R-547
CTSB	A375	8.17359e-06	0.146556	0.00086729	0.00086729	0.255029	-0.1133	0.81315	0.1942	0.7293	0.7293	0.1942	BRD-K57041787	dabigatran-etexilate
CTSB	MCF7	8.18071e-06	0.0307439	0.0764947	0.0764947	0.007048	-0.2102	0.5079	0.46945	0.3888	0.3888	0.6171	BRD-A87137733	GSK-690693
CTSB	A549	8.2385e-06	2.88378e-05	8.33451e-13	8.33451e-13	0.079642	0	1.54345	2.397	2.3208	2.3208	0.4251	BRD-K09951645	dabrafenib
CTSB	A549	8.37662e-06	0.477333	0.0752845	0.0752845	0.192238	0	-0.44045	-0.1484	-0.24775	-0.24775	-0.5307	BRD-K76969307	CG-930
CTSB	HA1E	8.48146e-06	0.333775	0.0675125	0.0675125	0.0511989	-0.0725	1.0647	0.4869	0.4169	0.4169	1.1017	BRD-A39935389	teroxirone
CTSB	HEPG2	8.55836e-06	0.00535289	0.00779849	0.00779849	0.0339216	-0.2475	1.17895	1.0976	0.7793	0.7793	1.2603	BRD-K03063480	PF-477736
CTSB	A375	8.71451e-06	0.00548298	0.0434445	0.0434445	0.0035304	-0.1133	-1.724	-1.8124	-1.0246	-1.0246	-2.8666	BRD-K86892782	edoxudine
CTSB	HT29	9.00084e-06	0.386805	0.090895	0.090895	0.00194641	-0.19715	0.7123	2.5976	-0.0894	-0.0894	5.11315	BRD-K42191735	buparlisib
CTSB	HA1E	9.10334e-06	0.779084	0.223773	0.223773	0.00449651	-0.0725	1.65215	-0.1336	0.4161	0.4161	1.7739	BRD-K02389548	RG-2833
CTSB	PC3	9.23576e-06	0.00297297	1.97082e-05	1.97082e-05	0.0335916	-0.0636	2.3601	2.3924	2.3278	2.3278	2.848	BRD-K15179879	carfilzomib
CTSB	MCF7	9.24228e-06	0.017891	0.00210264	0.00210264	0.0717783	-0.2102	1.5067	1.0934	0.75185	0.75185	2.57185	BRD-K65182930	NVP-AUY922
CTSB	A375	9.46284e-06	0.0109294	6.80008e-05	6.80008e-05	0.0357246	-0.1133	0.70015	0.8503	0.7885	0.7885	0.6745	BRD-K73109821	diazoxide
CTSB	MCF7	9.58963e-06	0.313613	0.00127418	0.00127418	0.0263689	-0.2102	0.6452	0.0583	0.7376	0.7376	1.30365	BRD-K37590257	GSK-256066
CTSB	A375	9.67493e-06	0.0149242	0.0134809	0.0134809	0.0136048	-0.1133	0.6745	0.8504	0.6745	0.6745	0.9828	BRD-K00521308	ATN-161
CTSB	MCF7	9.69419e-06	0.139012	0.257929	0.257929	0.00346816	-0.2102	1.318	0.349	0.168	0.168	1.8717	BRD-K72951360	valrubicin
CTSB	A375	9.77885e-06	0.278222	0.0151935	0.0151935	0.0368603	-0.1133	0.7937	0.5922	0.63235	0.63235	0.5605	BRD-K44942188	fomocaine
CTSB	HA1E	9.81172e-06	0.481121	0.455035	0.455035	0.0137256	-0.0725	0.5712	0.1217	-0.05375	-0.05375	0.62665	BRD-K64890080	BI-2536
CTSB	A375	9.90042e-06	0.0256572	0.039715	0.039715	0.00415204	-0.1133	0.9886	0.7256	0.4135	0.4135	1.57	BRD-U64521890	XMD-16144
CTSB	HA1E	9.99754e-06	0.0479445	0.000669672	0.000669672	0.00876541	-0.0725	0.841	0.5284	0.8342	0.8342	1.5112	BRD-K44273375	tolnaftate
CTSB	HCC515	1.01044e-05	0.0319327	0.000693168	0.000693168	0.265987	-0.4432	0.7591	0.7556	0.7556	0.7556	-0.3028	BRD-K79259477	NVP-BHG712
CTSB	A375	1.01876e-05	0.167957	0.00116726	0.00116726	0.0101	-0.1133	0.71125	0.313	0.7062	0.7062	1.1621	BRD-K82522873	N6022
CTSB	HCC515	1.07367e-05	0.00297871	0.22578	0.22578	0.00292601	-0.4432	1.66105	1.9436	-0.2163	-0.2163	2.7657	BRD-K37687095	AZD-8330
CTSB	A549	1.07884e-05	0.000406293	1.84254e-08	1.84254e-08	0.00159209	0	-1.02285	-1.6922	-1.7749	-1.7749	-1.0736	BRD-K57169635	dacomitinib
CTSB	A549	1.08324e-05	0.0106767	0.00189305	0.000594914	0.0103006	0	-0.5144	-0.58175	-0.6621	-0.58175	-0.58175	BRD-A79768653	sirolimus
CTSB	A375	1.08881e-05	0.0132187	0.00961639	0.00961639	0.13139	-0.1133	-1.0642	-1.1952	-0.88655	-0.88655	-0.9645	BRD-K48213016	CC-930
CTSB	HA1E	1.09248e-05	0.0414616	0.000273661	0.000273661	0.66532	-0.0725	-1.488	-1.1877	-1.4375	-1.4375	-0.799	BRD-K89014967	AS-703026
CTSB	PC3	1.0987e-05	0.428299	0.0266278	0.0266278	0.161273	-0.0636	1.15825	0.2297	0.3337	0.3337	1.1396	BRD-K05870596	XMD-1499
CTSB	HT29	1.12633e-05	0.0429484	0.00107168	0.00107168	0.0416938	-0.19715	-0.8468	-0.8622	-0.8468	-0.8468	-1.2699	BRD-A32172948	methiopril
CTSB	A549	1.12724e-05	0.0504634	0.18122	0.18122	0.00746534	0	-0.46595	-0.5795	-0.06255	-0.06255	-0.7441	BRD-K13094524	PFI-1
CTSB	HT29	1.12828e-05	0.134899	0.0377239	0.0377239	0.0716422	-0.19715	0.8701	0.2133	0.2133	0.2133	0.416	BRD-K24576554	AT-9283
CTSB	A375	1.13854e-05	0.0101573	0.000901331	0.000901331	0.027946	-0.1133	-1.2268	-1.2288	-1.2288	-1.2288	-1.1116	BRD-K35629949	SR-27897
CTSB	PC3	1.14058e-05	0.178519	0.0276079	0.0276079	0.0288222	-0.0636	0.5952	0.4614	0.5069	0.5069	0.7919	BRD-K68938568	GDC-0152
CTSB	MCF7	1.15024e-05	0.011763	0.042532	0.042532	0.00517191	-0.2102	0.79695	0.8095	0.1537	0.1537	1.5043	BRD-K60585088	paricalcitol
CTSB	A549	1.15325e-05	0.00499961	1.91374e-06	1.91374e-06	0.464281	0	0.9891	1.2614	1.4866	1.4866	-0.2563	BRD-K23984367	sorafenib
CTSB	A549	1.16474e-05	0.00430658	0.00129456	0.00129456	0.0501622	0	-0.6683	-2.0553	-0.6745	-0.6745	-0.9807	BRD-K64800655	PHA-793887
CTSB	HA1E	1.20007e-05	0.0146177	0.000693221	0.000693221	0.0175055	-0.0725	0.40365	0.7467	0.5133	0.5133	0.62595	BRD-K49328571	dasatinib
CTSB	HCC515	1.21177e-05	0.073602	0.147993	0.147993	0.00867218	-0.4432	0.6505	0.1194	-0.1405	-0.1405	0.8159	BRD-K52911425	GDC-0941
CTSB	HEPG2	1.21814e-05	0.0251374	0.00233403	0.00233403	0.534614	-0.2475	0.6948	0.6451	0.6565	0.6565	0.1937	BRD-K40738845	BMS-777607
CTSB	A375	1.24493e-05	0.00928323	0.00759743	0.00759743	0.796996	-0.1133	-0.60625	-0.7515	-0.56555	-0.56555	-0.12315	BRD-K20285085	fostamatinib
CTSB	MCF7	1.25758e-05	0.00621654	0.00207547	0.00207547	0.201459	-0.2102	1.05535	1.0329	0.9326	0.9326	1.0778	BRD-K07881437	danusertib
CTSB	HA1E	1.29904e-05	0.00288407	0.0235032	0.0235032	0.00351373	-0.0725	2.2276	5.1253	0.4013	0.4013	2.2276	BRD-A24396574	celastrol
CTSB	MCF7	1.32251e-05	0.0855335	0.0611381	0.0611381	0.0217332	-0.2102	0.48945	0.3408	0.2384	0.2384	0.6911	BRD-A69815203	cyclosporin-a
CTSB	MCF7	1.32362e-05	0.109418	0.100467	0.100467	0.00450031	-0.2102	0.89705	1.477	0.3036	0.3036	2.0485	BRD-K14529030	meisoindigo
CTSB	MCF7	1.33058e-05	0.00406262	0.128682	0.128682	0.00304191	-0.2102	1.6881	1.6881	0.2774	0.2774	2.7272	BRD-K86525559	AZD-7762
CTSB	A375	1.34188e-05	0.129397	0.00948764	0.00948764	0.0210376	-0.1133	-1.0729	-0.9803	-0.9803	-0.9803	-4.4348	BRD-A89175223	bisoprolol
CTSB	HA1E	1.35622e-05	0.0611313	0.0021525	0.0021525	0.104898	-0.0725	0.9049	0.9049	0.8223	0.8223	0.7346	BRD-K41731458	triclosan
CTSB	HA1E	1.3653e-05	0.107991	0.00107632	0.00107632	0.967418	-0.0725	0.77715	0.4427	0.6745	0.6745	0.2294	BRD-K50564936	E-2012
CTSB	HA1E	1.37782e-05	0.0101442	2.90717e-06	2.90717e-06	0.00449651	-0.0725	-2.5891	-3.5749	-3.5749	-3.5749	-2.6788	BRD-K78055238	LY-2090314
CTSB	MCF7	1.39296e-05	0.0339692	0.0481545	0.0481545	0.0649298	-0.2102	0.63	0.7421	0.2929	0.2929	0.546	BRD-A13021932	BMS-509744
CTSB	HT29	1.39955e-05	0.0876064	0.0012	0.0012	0.19382	-0.19715	-0.7049	-0.66055	-0.774	-0.774	-0.60925	BRD-A58280226	Y-27632
CTSB	PC3	1.42703e-05	0.283287	0.000878834	0.000878834	0.145317	-0.0636	0.8975	1.3307	1.3307	1.3307	0.915	BRD-K50498985	taladegib
CTSB	HT29	1.42759e-05	0.142966	0.274911	0.274911	0.00994382	-0.19715	0.4883	0.03705	0.03705	0.03705	0.7486	BRD-K83963101	MLN-8054
CTSB	HT29	1.45261e-05	0.134496	0.00231156	0.00231156	0.00916854	-0.19715	0.45625	0.5381	0.52825	0.52825	0.66915	BRD-K60866521	idelalisib
CTSB	A375	1.46132e-05	0.0407898	0.00013566	0.00013566	0.134679	-0.1133	0.7716	0.4958	0.7922	0.7922	0.3106	BRD-A67479912	progesterone
CTSB	A375	1.47593e-05	0.142026	0.0270176	0.0270176	0.203009	-0.1133	0.5976	0.3902	0.3305	0.3305	0.7132	BRD-K82928847	ACY-1215
CTSB	HT29	1.47813e-05	0.0472896	0.000258089	0.000258089	0.145932	-0.19715	0.7053	0.8578	0.8578	0.8578	0.3484	BRD-K46056750	AZD-7762
CTSB	PC3	1.47941e-05	0.00946717	0.00235875	0.00235875	0.634243	-0.0636	1.00475	1.3767	0.9467	0.9467	0.0431	BRD-K68407802	KIN001-055
CTSB	HCC515	1.48021e-05	0.0558288	0.0726559	0.0726559	0.0176608	-0.4432	0.4823	0.5219	-0.1208	-0.1208	0.4427	BRD-K19687926	lapatinib
CTSB	MCF7	1.51113e-05	0.202736	0.0272579	0.0272579	0.0167374	-0.2102	0.7919	0.7457	0.7688	0.7688	0.6477	BRD-K01577834	adenosine
CTSB	A375	1.52215e-05	0.0660758	0.00405079	0.00405079	0.236303	-0.1133	-1.4363	-1.121	-1.121	-1.121	-0.9355	BRD-K16803204	filgotinib
CTSB	PC3	1.53361e-05	0.015066	0.000275858	0.000275858	0.0412526	-0.0636	-1.24765	-1.9312	-1.9312	-1.9312	-1.1509	BRD-K06569345	HG-5-88-01
CTSB	HA1E	1.55787e-05	0.00882889	0.069017	0.069017	0.0228701	-0.0725	0.9663	1.2444	0.4312	0.4312	0.8983	BRD-K90382497	GW-843682X
CTSB	PC3	1.56213e-05	0.332537	0.0669472	0.0669472	0.0202953	-0.0636	-1.32	-0.2904	-0.4362	-0.4362	-2.1878	BRD-K64857848	XMD-885
CTSB	HT29	1.56837e-05	0.921678	0.215868	0.215868	0.00953106	-0.19715	1.72795	0.3959	0.3528	0.3528	2.5388	BRD-K62196610	AVN-944
CTSB	HA1E	1.57777e-05	0.383987	0.0179188	0.0179188	0.147525	-0.0725	1.11275	0.0757	0.4328	0.4328	1.7185	BRD-K28822270	resminostat
CTSB	HCC515	1.58884e-05	0.221729	0.989985	0.989985	0.0740443	-0.4432	0.4864	0.4864	-0.6469	-0.6469	0.0424	BRD-K81418486	vorinostat
CTSB	A375	1.62438e-05	0.0132915	0.00133239	0.00133239	0.507055	-0.1133	-0.9081	-1.4381	-0.9773	-0.9773	-0.3446	BRD-K29735307	ostarine
CTSB	HEPG2	1.64236e-05	0.0939815	0.00283062	0.00283062	0.00765975	-0.2475	0.47965	0.5445	0.5445	0.5445	0.7944	BRD-K68756823	FR-180204
CTSB	PC3	1.66768e-05	0.0631208	0.000122513	0.000122513	0.0178518	-0.0636	0.50925	1.0692	1.11875	1.11875	0.5587	BRD-K79254416	decitabine
CTSB	A375	1.67969e-05	0.0992937	0.01362	0.01362	0.0897972	-0.1133	2.1418	-1.6078	2.1418	2.1418	1.8934	BRD-K81258678	triptolide
CTSB	HCC515	1.701e-05	0.363029	0.024053	0.024053	0.300371	-0.4432	1.09105	0.4756	0.4756	0.4756	-0.402	BRD-K13662825	dinaciclib
CTSB	A375	1.71822e-05	0.00447114	0.0109971	0.0109971	0.00295665	-0.1133	1.41015	1.6084	1.147	1.147	2.8475	BRD-K34185671	AMG-517
CTSB	HA1E	1.72562e-05	0.0700603	0.0709013	0.0709013	0.0294678	-0.0725	0.9613	0.6565	0.3861	0.3861	1.0854	BRD-K95142244	talazoparib
CTSB	A375	1.72817e-05	0.479587	0.150727	0.150727	0.189237	-0.1133	0.3792	0.40825	0.1361	0.1361	0.52605	BRD-K57169635	dacomitinib
CTSB	A375	1.7425e-05	0.0342016	0.0123537	0.0123537	0.192458	-0.1133	0.5255	0.5255	0.5192	0.5192	0.2707	BRD-K00911143	brexpiprazole
CTSB	A375	1.7472e-05	0.226372	0.236025	0.236025	0.0109909	-0.1133	0.99705	0.8828	0.2004	0.2004	1.0354	BRD-K60038276	irbesartan
CTSB	HEPG2	1.7494e-05	0.00307912	0.00741497	0.00741497	0.00378906	-0.2475	1.2449	1.5758	0.9522	0.9522	1.5624	BRD-U61997977	WZ-4-145
CTSB	PC3	1.78949e-05	0.00286827	0.000191018	0.000191018	0.199366	-0.0636	1.4454	3.0455	1.98	1.98	1.5738	BRD-K51967704	BIIB-021
CTSB	A549	1.80246e-05	0.803103	0.681062	0.681062	0.018342	0	0.6745	0.0644	0.0644	0.0644	0.62425	BRD-K26756394	VE-821
CTSB	HCC515	1.82177e-05	0.0479147	0.000372858	0.000372858	0.848113	-0.4432	0.6801	0.2109	0.6801	0.6801	-0.25605	BRD-K54606188	JQ1-(+)
CTSB	A375	1.84544e-05	0.544446	0.0763065	0.0763065	0.0290827	-0.1133	0.80165	0.1095	0.1095	0.1095	0.8414	BRD-A03249105	fulvestrant
CTSB	HA1E	1.8517e-05	0.493467	0.00364665	0.00364665	0.0866586	-0.0725	2.975	0.3328	3.2519	3.2519	3.8772	BRD-K81258678	triptolide
CTSB	PC3	1.87802e-05	0.166851	0.0101183	0.0101183	0.0391153	-0.0636	0.9906	0.64445	0.5237	0.5237	2.2569	BRD-K50398167	meclofenamic-acid
CTSB	HA1E	1.89212e-05	0.629345	0.694659	0.694659	0.000341014	-0.0725	0.77965	0.07435	-0.3174	-0.3174	1.5027	BRD-K67868012	PI-103
CTSB	HA1E	1.91971e-05	0.125039	0.183973	0.183973	0.0165007	-0.0725	2.2417	0.8017	-0.0176	-0.0176	2.56675	BRD-K79131256	albendazole
CTSB	HEPG2	1.92718e-05	0.0181305	0.000220895	0.000220895	0.011595	-0.2475	-1.57985	-2.307	-2.3222	-2.3222	-1.6883	BRD-K31313613	BS-181
CTSB	HA1E	1.92859e-05	0.0603869	0.00503075	0.00503075	0.0525921	-0.0725	0.7978	0.5598	0.5598	0.5598	1.0067	BRD-K67121414	apixaban
CTSB	HT29	1.93347e-05	0.0278699	0.077787	0.077787	0.0181206	-0.19715	0.9099	1	0.447	0.447	1.396	BRD-K68174511	torin-2
CTSB	HA1E	1.95211e-05	0.019179	5.79402e-05	5.79402e-05	0.239325	-0.0725	-1.23565	-1.1744	-1.2906	-1.2906	-2.1524	BRD-K92441787	bexarotene
CTSB	HCC515	1.95288e-05	0.0239717	0.0280449	0.0280449	0.275522	-0.4432	0.7283	0.5476	0.0071	0.0071	1.2401	BRD-K36740062	GSK-1070916
CTSB	HEPG2	1.97722e-05	0.269222	0.169135	0.169135	0.00287091	-0.2475	1.3054	-0.146	-0.146	-0.146	1.925	BRD-K42436189	AZ-20
CTSB	HT29	1.98287e-05	0.132212	0.00329092	0.00329092	0.0519343	-0.19715	0.4072	0.3707	0.3644	0.3644	0.8595	BRD-K59227464	LY-2228820
CTSB	MCF7	1.98293e-05	0.00714715	0.00317508	0.00317508	0.0414301	-0.2102	0.6842	1.0317	0.5564	0.5564	0.96935	BRD-K64800655	PHA-793887
CTSB	A375	2.04857e-05	0.114966	0.0251605	0.0251605	0.0164429	-0.1133	0.5835	0.48	0.43505	0.43505	0.8247	BRD-A93000692	ciglitazone
CTSB	A549	2.05956e-05	0.0160254	0.00270479	0.00270479	0.0296876	0	1.3539	1.442	1.442	1.442	1.5781	BRD-K53417444	OTS-167
CTSB	MCF7	2.07814e-05	0.0315745	0.00594123	0.00594123	0.681134	-0.2102	0.7335	0.9736	0.4538	0.4538	0.1173	BRD-K51350053	toremifene
CTSB	PC3	2.08006e-05	0.0185563	0.119564	0.119564	0.0131654	-0.0636	0.8809	0.9139	0.7075	0.7075	1.3395	BRD-K89014967	AS-703026
CTSB	HA1E	2.09343e-05	0.00445505	0.00174524	0.00174524	0.247678	-0.0725	0.75095	2.1812	0.8192	0.8192	0.4858	BRD-K24515980	QL-XI-92
CTSB	HA1E	2.1236e-05	0.0228112	0.00485642	0.00485642	0.0620897	-0.0725	0.67695	0.9967	0.6588	0.6588	0.9506	BRD-K37111771	trientine
CTSB	MCF7	2.13322e-05	0.202221	0.151448	0.151448	0.123609	-0.2102	0.3039	0.1585	0.195	0.195	0.1554	BRD-K93788137	PF-431396
CTSB	HCC515	2.14362e-05	0.0925247	0.0203078	0.0203078	0.00713517	-0.4432	0.784	1.0429	0.3891	0.3891	0.9558	BRD-K40738845	BMS-777607
CTSB	HA1E	2.18713e-05	0.0156137	0.0255427	0.0255427	0.00402759	-0.0725	1.5059	2.6138	0.4015	0.4015	2.1671	BRD-K15108141	gemcitabine
CTSB	A549	2.20225e-05	0.0382918	0.000443673	0.000443673	0.196289	0	0.6745	0.6745	0.6745	0.6745	0.4219	BRD-K65182930	NVP-AUY922
CTSB	PC3	2.23928e-05	0.082894	0.0115298	0.0115298	0.116132	-0.0636	0.7851	0.4479	0.6165	0.6165	0.7575	BRD-K58550667	FK-866
CTSB	PC3	2.28986e-05	0.196927	0.0014725	0.0014725	0.0250337	-0.0636	1.0585	1.2175	1.2175	1.2175	0.8995	BRD-K27204852	balicatib
CTSB	MCF7	2.30765e-05	0.0818251	0.312569	0.312569	0.00613185	-0.2102	1.0642	0.5585	-0.0321	-0.0321	1.1595	BRD-A48237631	mitomycin-c
CTSB	MCF7	2.32231e-05	0.0224718	0.0177757	0.0177757	0.028639	-0.2102	0.391	0.6184	0.3307	0.3307	0.5583	BRD-K06569345	HG-5-88-01
CTSB	A375	2.32858e-05	0.13164	0.00151439	0.00151439	0.30235	-0.1133	0.7278	0.4475	0.8147	0.8147	0	BRD-K51087630	tirasemtiv
CTSB	A375	2.33692e-05	0.00819511	7.48576e-05	7.48576e-05	0.104945	-0.1133	-0.9887	-1.9626	-1.0048	-1.0048	-1.1386	BRD-K53857191	risperidone
CTSB	A375	2.3519e-05	0.00619986	0.010221	0.010221	0.00640604	-0.1133	0.9788	1.3788	0.9019	0.9019	1.2548	BRD-U60236422	WH-4-025
CTSB	HEPG2	2.39216e-05	0.0171047	0.00238226	0.00238226	0.083414	-0.2475	0.6745	1.4766	0.4564	0.4564	0.7503	BRD-K13390322	AT-7519
CTSB	MCF7	2.42532e-05	0.0864401	0.0175886	0.0175886	0.0213231	-0.2102	0.6552	0.755	0.5488	0.5488	0.8323	BRD-K00911143	brexpiprazole
CTSB	A375	2.4473e-05	0.131128	0.0861434	0.0861434	0.0200211	-0.1133	-1.4403	-1.3945	-1.0345	-1.0345	-2.05915	BRD-A44448661	pentobarbital
CTSB	HT29	2.49596e-05	0.0412498	0.000340186	0.000340186	0.164283	-0.19715	4.8355	2.6076	4.7829	4.7829	4.2824	BRD-K99475619	genz-644282
CTSB	PC3	2.5099e-05	0.0460968	0.0513646	0.0513646	0.0100033	-0.0636	0.8139	0.665	0.5875	0.5875	1.1153	BRD-A60245366	AS-601245
CTSB	A375	2.51276e-05	0.0296658	0.0476553	0.0476553	0.161113	-0.1133	0.6677	0.7825	0.4591	0.4591	0.3398	BRD-K43797669	genistein
CTSB	HT29	2.51829e-05	0.355788	0.0234269	0.0234269	0.174399	-0.19715	0.64365	0.1888	0.2176	0.2176	0.3476	BRD-K07220430	cinnarizine
CTSB	HA1E	2.52009e-05	0.0852659	0.932999	0.932999	0.00184399	-0.0725	0.6617	0.43395	-0.2746	-0.2746	0.8701	BRD-K08799216	pelitinib
CTSB	A375	2.52165e-05	0.00729384	0.307453	0.307453	0.0030915	-0.1133	1.19905	1.1289	0.1112	0.1112	2.0071	BRD-K93034159	cladribine
CTSB	MCF7	2.59463e-05	0.0262274	0.0243757	0.0243757	0.0907455	-0.2102	0.68395	0.6099	0.6099	0.6099	0.7828	BRD-K27938825	ASA-404
CTSB	A375	2.60989e-05	0.0775802	0.227101	0.227101	0.00685719	-0.1133	-1.1763	-1.1756	-0.258	-0.258	-1.8747	BRD-K67578145	GDC-0879
CTSB	HCC515	2.63011e-05	0.0795227	0.00404689	0.00404689	0.0527419	-0.4432	0.5568	0.3528	0.526	0.526	0.566	BRD-K82484347	GSK-J2
CTSB	HT29	2.63865e-05	0.583743	0.370943	0.370943	0.0162758	-0.19715	1.39895	-0.209	-0.209	-0.209	1.2792	BRD-K77987382	mebendazole
CTSB	A375	2.74453e-05	0.240123	0.00302918	0.00302918	0.0315145	-0.1133	0.5079	0.4027	0.51365	0.51365	0.5592	BRD-K50163129	acrivastine
CTSB	PC3	2.7633e-05	NA	NA	NA	NA	-0.0636	2.8208	NA	NA	NA	NA	BRD-A61304759	tanespimycin
CTSB	A375	2.7757e-05	0.222819	0.0482611	0.0482611	0.118738	-0.1133	-1.313	-0.5783	-0.5783	-0.5783	-1.3945	BRD-K48168960	propylthiouracil
CTSB	HT29	2.80138e-05	0.00744209	0.00291304	0.00291304	0.00701463	-0.19715	1.26485	2.4	1.3022	1.3022	2.2477	BRD-K19061412	mubritinib
CTSB	A375	2.8224e-05	0.00799565	3.07783e-05	3.07783e-05	0.186344	-0.1133	-1.17335	-1.9701	-1.5733	-1.5733	-0.7578	BRD-K89732114	trifluoperazine
CTSB	MCF7	2.8364e-05	0.10872	0.00171474	0.00171474	0.231789	-0.2102	-1.027	-1.0777	-1.0436	-1.0436	-1.0104	BRD-A14941520	dofequidar
CTSB	MCF7	2.89192e-05	0.0646028	0.00680958	0.00680958	0.00633688	-0.2102	0.51915	0.3598	0.2908	0.2908	1.2696	BRD-K44974079	ticagrelor
CTSB	HEPG2	2.9627e-05	0.054259	0.0144809	0.0144809	0.00307912	-0.2475	0.60465	0.8535	0.4344	0.4344	1.523	BRD-K85606544	neratinib
CTSB	HA1E	3.0673e-05	0.057873	0.011653	0.011653	0.221354	-0.0725	1.1127	1.2288	1.0575	1.0575	0.364	BRD-K35960502	niclosamide
CTSB	A375	3.12944e-05	0.028297	0.000329994	0.000329994	0.0709854	-0.1133	0.71695	0.8991	0.7922	0.7922	0.44	BRD-K67277431	picotamide
CTSB	A375	3.15429e-05	0.0235925	0.0630721	0.0630721	0.0374844	-0.1133	0.8189	0.8828	0.5546	0.5546	0.8828	BRD-K32318651	acyclovir
CTSB	A375	3.18396e-05	0.0637981	0.00336683	0.00336683	0.209874	-0.1133	0.57	0.3517	0.6393	0.6393	0.98945	BRD-K84163249	ercalcitriol
CTSB	A375	3.19612e-05	0.0439265	0.0165766	0.0165766	0.161406	-0.1133	-1.0174	-0.9256	-0.9715	-0.9715	-0.7714	BRD-A95032015	abacavir
CTSB	A375	3.25492e-05	0.146965	0.0457535	0.0457535	0.0320998	-0.1133	-0.8333	-1.1952	-0.586	-0.586	-0.9288	BRD-K35586044	yohimbine
CTSB	PC3	3.30099e-05	0.0408568	0.00321496	0.00321496	0.145317	-0.0636	0.72315	0.7098	0.7098	0.7098	0.7001	BRD-A67516570	lafutidine
CTSB	HA1E	3.30524e-05	0.0750267	0.023302	0.023302	0.0326795	-0.0725	0.69055	0.8487	0.6745	0.6745	1.37475	BRD-K82746043	navitoclax
CTSB	HEPG2	3.31766e-05	0.318605	0.00893634	0.00893634	0.628472	-0.2475	0.44615	0.2445	0.3769	0.3769	-0.0967	BRD-K99616396	motesanib
CTSB	A549	3.32865e-05	0.00283029	3.39715e-05	3.39715e-05	0.00296395	0	1.83705	2.9104	1.869	1.869	2.3366	BRD-K16478699	PLX-4720
CTSB	HCC515	3.34633e-05	0.24315	0.0829552	0.0829552	0.0334972	-0.4432	0.1212	-0.0749	-0.1644	-0.1644	0.272	BRD-K93788137	PF-431396
CTSB	A375	3.37912e-05	0.150966	0.0349484	0.0349484	0.0589754	-0.1133	0.61035	0.5775	0.2788	0.2788	0.6432	BRD-K76022557	r(-)-apomorphine
CTSB	A375	3.39089e-05	0.00608993	0.000317013	0.000317013	0.109213	-0.1133	0.71895	1.1345	1.0697	1.0697	0.7054	BRD-K44876623	zolpidem
CTSB	HT29	3.40368e-05	0.017643	0.00106953	0.00106953	0.106071	-0.19715	0.75445	1.0639	1.0639	1.0639	0.6301	BRD-A67516570	lafutidine
CTSB	HA1E	3.40719e-05	0.0403927	0.00351352	0.00351352	0.116098	-0.0725	0.63745	0.8342	0.7423	0.7423	0.6277	BRD-K63923597	barasertib-HQPA
CTSB	MCF7	3.40741e-05	0.100245	0.0470749	0.0470749	0.0508085	-0.2102	0.44315	0.3757	0.3409	0.3409	0.3692	BRD-A37780065	triamcinolone
CTSB	HA1E	3.48071e-05	0.379167	0.037097	0.037097	0.0254985	-0.0725	-1.4328	-0.9322	-0.91345	-0.91345	-2.387	BRD-K82244583	binimetinib
CTSB	HCC515	3.49353e-05	0.0103343	8.09968e-05	8.09968e-05	0.621899	-0.4432	0.4851	0.7669	0.7669	0.7669	-0.4304	BRD-K37720887	SB-525334
CTSB	HA1E	3.50063e-05	0.843944	0.140284	0.140284	0.0899103	-0.0725	0.7291	0.0834	0.3431	0.3431	0.7611	BRD-K77987382	mebendazole
CTSB	MCF7	3.54907e-05	0.045015	0.0140352	0.0140352	0.0680022	-0.2102	0.683	0.6465	0.6465	0.6465	0.5959	BRD-A67097164	ifosfamide
CTSB	MCF7	3.56187e-05	0.0138207	0.139416	0.139416	0.00723961	-0.2102	1.0831	1.1139	0.4472	0.4472	1.1564	BRD-K99023089	AZD-5363
CTSB	A375	3.57533e-05	0.0985922	0.420137	0.420137	0.00546647	-0.1133	0.7645	0.6151	0.204	0.204	1.8494	BRD-K66175015	afatinib
CTSB	A549	3.65378e-05	0.00914638	2.95294e-07	2.95294e-07	0.0275684	0	-0.6745	-0.8762	-1.1991	-1.1991	-0.6745	BRD-A25736793	everolimus
CTSB	A375	3.67173e-05	0.039693	0.00352008	0.00352008	0.156191	-0.1133	-0.86	-1.0246	-0.86	-0.86	-0.6387	BRD-A86216746	varenicline
CTSB	MCF7	3.67329e-05	0.996761	0.415487	0.415487	0.00476153	-0.2102	1.2947	-0.4821	-0.4821	-0.4821	1.2985	BRD-K42436189	AZ-20
CTSB	HEPG2	3.7033e-05	0.00678873	0.01911	0.01911	0.00335872	-0.2475	0.78365	0.8512	0.6903	0.6903	1.3974	BRD-K76694128	rebastinib
CTSB	HT29	3.7111e-05	0.0307664	0.00566113	0.00566113	0.111519	-0.19715	0.8409	0.6812	0.6571	0.6571	0.8409	BRD-K02950022	BMS-299897
CTSB	A375	3.71441e-05	0.856138	0.0489706	0.0489706	0.0478686	-0.1133	0.77705	-0.1926	0.2785	0.2785	0.6536	BRD-K80608265	erteberel
CTSB	MCF7	3.72046e-05	0.00531072	0.00012611	0.00012611	0.0241992	-0.2102	0.8954	1.356	1.7431	1.7431	0.5585	BRD-K83699324	NMS-1286937
CTSB	HT29	3.73559e-05	0.0359881	0.364865	0.364865	0.0973396	-0.19715	0.52805	0.50835	0.04345	0.04345	0.72055	BRD-K59369769	tozasertib
CTSB	MCF7	3.74978e-05	0.569398	0.112983	0.112983	0.0204588	-0.2102	0.3368	-0.31645	0.0923	0.0923	0.49105	BRD-K42805893	osimertinib
CTSB	PC3	3.77968e-05	0.23519	0.0946007	0.0946007	0.00338374	-0.0636	2.0644	1.5165	0.82655	0.82655	2.1181	BRD-K53665955	MK-5108
CTSB	A549	3.78845e-05	0.0392926	0.00631492	0.00631492	0.0124374	0	-0.79315	-0.6745	-0.6745	-0.6745	-0.796	BRD-K72636697	QL-X-138
CTSB	HT29	3.79878e-05	0.371662	0.0120547	0.0120547	0.0602507	-0.19715	-1.044	-0.63875	-0.88875	-0.88875	-1.1158	BRD-A22380646	pantoprazole
CTSB	MCF7	3.80743e-05	0.80826	0.063549	0.063549	0.130545	-0.2102	0.7295	-0.0783	0.0214	0.0214	0.5222	BRD-K28822270	resminostat
CTSB	A375	3.87677e-05	0.00324219	0.00772783	0.00772783	0.0152834	-0.1133	-2.9939	-2.9939	-1.9358	-1.9358	-6.4713	BRD-K76674262	homoharringtonine
CTSB	HT29	3.87711e-05	0.533918	0.000227554	0.000227554	0.0128411	-0.19715	-1.47605	-0.7404	-1.9981	-1.9981	-1.3205	BRD-A56085258	LGX-818
CTSB	MCF7	3.90253e-05	0.131005	0.00605541	0.00605541	0.061033	-0.2102	0.42055	0.3796	0.4044	0.4044	0.6128	BRD-A40084411	CGP-12177
CTSB	A375	3.93572e-05	0.0140774	0.0822978	0.0822978	0.150966	-0.1133	0.81575	1.3845	0.4752	0.4752	0.7811	BRD-K31111078	dimethyl-fumarate
CTSB	PC3	3.9656e-05	0.157475	0.00277224	0.00277224	0.0410546	-0.0636	-1.42465	-0.93645	-1.25695	-1.25695	-1.5968	BRD-K75958547	pitavastatin
CTSB	HEPG2	3.98201e-05	0.227429	0.0466631	0.0466631	0.270388	-0.2475	0.79075	1.0612	0.2924	0.2924	0.6194	BRD-K57169635	dacomitinib
CTSB	MCF7	4.06714e-05	0.320595	0.231066	0.231066	0.0146409	-0.2102	0.8056	0.7975	0.3555	0.3555	0.7662	BRD-K73237276	tacalcitol
CTSB	HA1E	4.08968e-05	0.00320509	0.000794777	0.000794777	0.233867	-0.0725	0.72725	3.513	1.3763	1.3763	0.4998	BRD-K73088654	floxuridine
CTSB	HA1E	4.10386e-05	0.0788519	0.00419361	0.00419361	0.122398	-0.0725	0.9979	1.0177	1.0177	1.0177	0.7511	BRD-K28456624	seocalcitol
CTSB	HT29	4.11336e-05	0.0503454	0.425972	0.425972	0.00420768	-0.19715	2.3268	1.3245	-0.1899	-0.1899	4.0096	BRD-K86525559	AZD-7762
CTSB	HT29	4.11403e-05	0.0033431	2.46948e-05	2.46948e-05	0.00327979	-0.19715	4.7197	5.5106	5.4652	5.4652	5.8431	BRD-K52020312	metronidazole
CTSB	A375	4.12192e-05	0.0241869	0.97774	0.322646	0.00299232	-0.1133	0.50615	0.6745	-0.2839	0.0623	0.5191	BRD-A79768653	sirolimus
CTSB	HCC515	4.14609e-05	0.0228005	0.0151457	0.0151457	0.0524079	-0.4432	0.145	0.3979	0.0875	0.0875	0.2866	BRD-K50140147	NVP-TAE684
CTSB	HA1E	4.20444e-05	0.0449183	0.124674	0.124674	0.0182388	-0.0725	0.69055	0.8313	0.3698	0.3698	1.0509	BRD-K85140930	aphidicolin
CTSB	PC3	4.30519e-05	0.0561914	0.00180598	0.00180598	0.0528634	-0.0636	1.47535	1.0063	1.0489	1.0489	2.4546	BRD-K92241597	tosedostat
CTSB	A549	4.35374e-05	0.273873	0.00503162	0.00503162	0.217924	0	-0.8425	-0.224	-1.0239	-1.0239	-0.201	BRD-K54997624	alpelisib
CTSB	HA1E	4.35593e-05	0.345976	0.109632	0.109632	0.0193822	-0.0725	0.74065	0.5322	0.4399	0.4399	1.0226	BRD-A03249105	fulvestrant
CTSB	MCF7	4.37296e-05	0.0822581	0.417577	0.417577	0.00148577	-0.2102	0.44995	0.39675	-0.1734	-0.1734	1.08865	BRD-U60236422	WH-4-025
CTSB	PC3	4.37997e-05	0.00736719	0.00386751	0.00386751	0.0280561	-0.0636	0.5849	0.74665	0.6097	0.6097	1.006	BRD-K11153516	iniparib
CTSB	A375	4.49358e-05	0.0516903	0.000572127	0.000572127	0.217108	-0.1133	-0.7377	-0.7658	-0.8435	-0.8435	-0.3433	BRD-K64785675	TG-100115
CTSB	HT29	4.50518e-05	0.232025	0.278083	0.278083	0.00947644	-0.19715	1.34055	0.0631	0.0631	0.0631	1.4683	BRD-K14109347	LY-2603618
CTSB	MCF7	4.50795e-05	0.857528	0.132119	0.132119	0.0187493	-0.2102	0.53385	-0.2129	0.178	0.178	0.7958	BRD-K39974922	lenvatinib
CTSB	A375	4.5245e-05	0.407634	0.019239	0.019239	0.301204	-0.1133	0.9012	0.9269	0.8827	0.8827	0.4943	BRD-K80343549	TAK-285
CTSB	A375	4.64216e-05	0.218938	0.0247791	0.0247791	0.241973	-0.1133	-0.99365	-0.9201	-0.8403	-0.8403	-0.48	BRD-A00376169	KBG
CTSB	HCC515	4.66562e-05	0.721712	0.00102915	0.00102915	0.765217	-0.4432	0.57845	-0.4947	0.5909	0.5909	-0.3698	BRD-K86856088	UNC-0638
CTSB	A375	4.80796e-05	0.587876	0.0639586	0.0639586	0.067754	-0.1133	0.64585	0.4732	0.4732	0.4732	0.7636	BRD-A37780065	triamcinolone
CTSB	A375	4.83241e-05	0.0729216	0.0389596	0.0389596	0.0159436	-0.1133	0.6502	0.6745	0.1253	0.1253	0.8526	BRD-K12539416	sulbutiamine
CTSB	A375	4.87846e-05	0.140653	0.0318947	0.0318947	0.0239568	-0.1133	0.6623	0.204	0.3824	0.3824	0.7716	BRD-A67516570	lafutidine
CTSB	A549	5.01311e-05	0.029134	0.00523388	0.00523388	0.0591061	0	-0.4865	-0.7838	-0.3523	-0.3523	-0.7599	BRD-K02123250	JNJ-38877605
CTSB	HA1E	5.19879e-05	0.205778	0.00631951	0.00631951	0.0869669	-0.0725	-0.79495	-0.5067	-0.7002	-0.7002	-0.71	BRD-A21584801	brivanib
CTSB	A549	5.23142e-05	0.0567928	0.476701	0.476701	0.0813709	0	-0.5982	-0.57155	-0.08805	-0.08805	-0.5982	BRD-K16730910	regorafenib
CTSB	A549	5.34416e-05	0.465361	0.00566748	0.00566748	0.028386	0	-0.77095	-0.201	-0.5355	-0.5355	-1.0239	BRD-K94176593	TWS-119
CTSB	PC3	5.40417e-05	0.987788	0.105215	0.105215	0.0268013	-0.0636	2.36395	0.4832	0.58335	0.58335	4.22655	BRD-K92093830	doxorubicin
CTSB	A375	5.44459e-05	0.011623	0.000288019	0.000288019	0.0133463	-0.1133	0.76415	0.9877	0.8014	0.8014	0.8249	BRD-U51024685	HG-6-64-01
CTSB	A375	5.54719e-05	0.295966	0.235802	0.235802	0.021534	-0.1133	0.65305	0.4303	0.3848	0.3848	0.7445	BRD-K24723746	solifenacin-succinate
CTSB	A375	5.69472e-05	0.132395	0.00145368	0.00145368	0.121189	-0.1133	-0.95655	-0.9672	-0.9459	-0.9459	-0.4642	BRD-K22969690	chloramphenicol
CTSB	HT29	5.70594e-05	0.0632103	0.00314282	0.00314282	0.248641	-0.19715	0.6721	0.5653	0.5653	0.5653	0.0678	BRD-K37289225	clozapine
CTSB	MCF7	5.71505e-05	0.00816513	0.624254	0.624254	0.0479583	-0.2102	0.49615	0.74905	-0.21025	-0.21025	0.6745	BRD-K48488978	YM-201636
CTSB	A375	5.90588e-05	0.000419403	0.00147479	5.90588e-05	0.00608085	-0.1133	0.54595	1.2856	0.4885	0.54595	1.341	BRD-K37846922	3,3'-diindolylmethane
CTSB	PC3	5.94334e-05	0.267022	0.00821676	0.00821676	0.272007	-0.0636	1.097	0.7073	0.7073	0.7073	0.8659	BRD-K78126613	menadione
CTSB	HT29	5.9647e-05	0.00539666	0.000387847	5.9647e-05	0.0559957	-0.19715	0.72095	1.0782	0.6957	0.72095	1.5657	BRD-K37846922	3,3'-diindolylmethane
CTSB	HT29	6.1322e-05	0.987745	0.0842649	0.0842649	0.412192	-0.19715	0.4691	-0.1416	0.2212	0.2212	0.02565	BRD-K92723993	imatinib
CTSB	HT29	6.16902e-05	0.0620476	0.000113263	0.000113263	0.0274097	-0.19715	-0.71995	-0.64335	-0.8968	-0.8968	-0.7576	BRD-K05804044	AZ-628
CTSB	A375	6.17094e-05	0.28215	0.0432981	0.0432981	0.249951	-0.1133	0.5603	0.1886	0.3445	0.3445	0.0578	BRD-K58550667	FK-866
CTSB	MCF7	6.17565e-05	0.456725	0.287473	0.287473	0.00718119	-0.2102	0.8946	0.4256	0.2054	0.2054	1.2153	BRD-K44942188	fomocaine
CTSB	PC3	6.18875e-05	0.355726	0.000918717	0.000918717	0.0551688	-0.0636	0.7438	0.8201	1.204	1.204	0.6738	BRD-K62310379	fluticasone-propionate
CTSB	A375	6.23368e-05	0.074661	0.00534482	0.00534482	0.102345	-0.1133	0.7914	1.2462	0.6745	0.6745	0.3271	BRD-K25394294	oxaprozin
CTSB	HT29	6.23383e-05	0.448132	0.62838	0.62838	0.10884	-0.19715	0.234	-0.0565	-0.0565	-0.0565	0.60795	BRD-A39996500	radicicol
CTSB	HA1E	6.24735e-05	0.979976	0.234426	0.234426	0.0676593	-0.0725	1.1904	-0.1881	0.3107	0.3107	1.3522	BRD-K30331124	ASC-J9
CTSB	A549	6.40679e-05	0.542113	0.000398459	0.000398459	0.000873112	0	-0.6471	-0.20955	-0.95575	-0.95575	-1.69595	BRD-K54256913	MK-1775
CTSB	HT29	6.53806e-05	0.588502	0.393937	0.393937	0.0098647	-0.19715	1.56935	-0.2562	-0.2043	-0.2043	2.1017	BRD-K61195623	combretastatin-A-4
CTSB	A375	6.56796e-05	0.0482125	0.965662	0.965662	0.00323434	-0.1133	0.35255	0.64495	-0.29225	-0.29225	1.17855	BRD-K49075727	nintedanib
CTSB	HT29	6.57697e-05	0.267988	0.101706	0.101706	0.0698706	-0.19715	0.71605	0.3373	0.3373	0.3373	0.6098	BRD-A68739437	NPK76-II-72-1
CTSB	A375	6.59531e-05	0.155906	0.00827661	0.00827661	0.0124239	-0.1133	0.4547	0.4694	0.44	0.44	0.9059	BRD-K62200014	anagrelide
CTSB	HT29	6.7405e-05	0.364607	0.0402604	0.0402604	0.605641	-0.19715	0.62385	0.3572	0.3572	0.3572	-0.0403	BRD-K28428262	brivanib
CTSB	A375	6.76455e-05	0.117367	0.06725	0.06725	0.0528646	-0.1133	0.33635	0.35255	0.10735	0.10735	0.4237	BRD-K92723993	imatinib
CTSB	MCF7	6.78621e-05	0.00431299	0.00394405	0.00394405	0.289558	-0.2102	0.9151	1.46	1.2793	1.2793	0.9363	BRD-K78055238	LY-2090314
CTSB	HT29	6.92542e-05	0.0950246	0.000692993	0.000692993	0.167604	-0.19715	0.93945	1.2983	1.4902	1.4902	0.3659	BRD-K32501161	vanoxerine
CTSB	HT29	6.93042e-05	0.865	0.197131	0.197131	0.00927184	-0.19715	-0.9138	-0.28285	-0.6585	-0.6585	-1.12175	BRD-K93123848	RAF-265
CTSB	A375	7.02132e-05	0.887942	0.79295	0.79295	0.00564063	-0.1133	0.5698	-0.0349	-0.09785	-0.09785	0.66975	BRD-K54256913	MK-1775
CTSB	MCF7	7.18625e-05	0.341687	0.00539886	0.00539886	0.557621	-0.2102	1.3844	-0.0077	1.61905	1.61905	-0.5733	BRD-K40718343	AEE-788
CTSB	A375	7.23415e-05	0.0217297	0.000696826	0.000696826	0.00459642	-0.1133	-1.1963	-1.1963	-1.1917	-1.1917	-2.6692	BRD-K76694128	rebastinib
CTSB	MCF7	7.26164e-05	0.883705	0.127374	0.127374	0.573506	-0.2102	0.3262	-0.29135	0	0	-0.1298	BRD-K92723993	imatinib
CTSB	A375	7.27467e-05	0.36729	0.0177084	0.0177084	0.0796616	-0.1133	0.50475	0.4979	0.4979	0.4979	0.3291	BRD-A22081593	sulmazole
CTSB	A375	7.30809e-05	0.0234324	0.00674618	0.00674618	0.0518972	-0.1133	-0.9038	-1.35305	-1.3376	-1.3376	-1.4054	BRD-K41895714	AS-605240
CTSB	A375	7.4036e-05	0.311865	0.114523	0.114523	0.0431618	-0.1133	0.68305	0.7973	0.4863	0.4863	0.8433	BRD-K41185545	ambrisentan
CTSB	A375	7.45946e-05	0.00308169	0.514797	0.514797	0.00292846	-0.1133	2.16345	2.4282	-0.1025	-0.1025	3.3273	BRD-K74305673	IKK-2-inhibitor-V
CTSB	HT29	7.47156e-05	0.951542	0.173268	0.173268	0.00533513	-0.19715	1.10365	-0.388	0.3088	0.3088	2.1221	BRD-K42898655	temsirolimus
CTSB	A375	7.53454e-05	0.175328	0.0200241	0.0200241	0.309994	-0.1133	0.801	0.317	1.2573	1.2573	0.317	BRD-K44974079	ticagrelor
CTSB	A375	7.69949e-05	0.993745	0.111378	0.111378	0.0318646	-0.1133	0.87955	0	0.2221	0.2221	1.3757	BRD-K02079473	oxatomide
CTSB	HA1E	7.7105e-05	0.0545125	0.000396893	0.000396893	0.123233	-0.0725	-1.1644	-1.3577	-1.4066	-1.4066	-1.0089	BRD-K13756951	bitopertin
CTSB	A375	7.73162e-05	0.150548	0.0819506	0.0819506	0.163025	-0.1133	0.5668	0.2282	0.1071	0.1071	0.3109	BRD-K53737926	amitriptyline
CTSB	MCF7	7.80245e-05	0.0217332	0.00157155	0.00157155	0.0864401	-0.2102	0.81145	0.8238	0.8238	0.8238	0.446	BRD-K62996583	lidoflazine
CTSB	HT29	7.81198e-05	0.979897	0.0596209	0.0596209	0.0680604	-0.19715	0.72035	-0.6522	0.691	0.691	0.6718	BRD-A04553218	chlorphenamine
CTSB	A375	7.88132e-05	0.0295191	0.0119554	0.0119554	0.128656	-0.1133	0.7626	0.6836	0.6836	0.6836	0.5361	BRD-A87479750	tenidap
CTSB	PC3	7.92945e-05	0.0144033	0.0782936	0.0782936	0.0145015	-0.0636	2.7897	8.22815	2.7897	2.7897	4.3164	BRD-K92571446	WZ-3105
CTSB	A375	7.93397e-05	0.415728	0.165974	0.165974	0.00997206	-0.1133	-0.9099	-1.0377	-0.372	-0.372	-2.6824	BRD-K68870568	flumatinib
CTSB	A375	7.99359e-05	0.0172519	0.17442	0.17442	0.00360883	-0.1133	0.8058	1.156	0.0867	0.0867	1.6677	BRD-K85402309	dovitinib
CTSB	HCC515	8.02993e-05	0.231195	0.0962756	0.0962756	0.0300137	-0.4432	-1.16935	-0.6464	-0.6464	-0.6464	-2.1102	BRD-K56751279	Y-39983
CTSB	A375	8.11391e-05	0.00315562	0.00187562	8.11391e-05	0.00661837	-0.1133	-0.91595	-1.6153	-0.857	-0.91595	-2.1037	BRD-A68281735	REV-5901
CTSB	MCF7	8.18485e-05	0.00539261	0.48446	0.48446	0.0028014	-0.2102	3.04305	1.874	-0.0585	-0.0585	4.4435	BRD-K23228615	GDC-0980
CTSB	HEPG2	8.22395e-05	0.0983651	0.931397	0.931397	0.00104117	-0.2475	0.5973	0.57815	-0.43715	-0.43715	2.0726	BRD-K88378636	withaferin-a
CTSB	HA1E	8.28475e-05	0.542682	0.015111	0.015111	0.0243861	-0.0725	0.71175	-0.1377	0.6745	0.6745	0.8519	BRD-A62035778	scopolamine
CTSB	HCC515	8.33702e-05	NA	NA	NA	NA	-0.4432	0.70965	NA	NA	NA	NA	BRD-A61304759	tanespimycin
CTSB	HA1E	8.45449e-05	0.0260544	5.47999e-05	5.47999e-05	0.0919797	-0.0725	2.5016	1.8029	2.8373	2.8373	1.4174	BRD-K15179879	carfilzomib
CTSB	A375	8.54936e-05	0.0187026	0.0313837	0.0313837	0.0597685	-0.1133	0.6692	0.6961	0.6423	0.6423	1.1102	BRD-K61567297	resatorvid
CTSB	HEPG2	8.55908e-05	0.139989	0.00441361	0.00441361	0.41227	-0.2475	0.8157	0.2385	0.8157	0.8157	0.6791	BRD-K37764012	PF-03758309
CTSB	PC3	8.63395e-05	0.26135	0.17541	0.17541	0.0210892	-0.0636	0.585	0.2993	0.3747	0.3747	0.5854	BRD-K99749624	linifanib
CTSB	HEPG2	8.67822e-05	0.067149	0.0390886	0.0390886	0.00335872	-0.2475	0.7189	0.7189	0.4472	0.4472	2.0198	BRD-A60245366	AS-601245
CTSB	A375	8.68516e-05	0.488109	0.401656	0.401656	0.00916853	-0.1133	0.99795	0.5935	0.5935	0.5935	0.9646	BRD-A90451247	KU-60019
CTSB	HA1E	8.7057e-05	0.45406	0.32815	0.32815	0.159658	-0.0725	0.28365	0.21955	0.10335	0.10335	0.48125	BRD-K68065987	MK-2206
CTSB	HA1E	8.77673e-05	0.106702	0.0227844	0.0227844	0.0310061	-0.0725	0.7713	0.7162	0.73105	0.73105	0.9955	BRD-K17894950	indirubin
CTSB	A375	8.77911e-05	0.380453	0.675076	0.675076	0.0029661	-0.1133	1.46195	-0.0141	-0.0141	-0.0141	2.7359	BRD-K63750851	mycophenolic-acid
CTSB	HA1E	8.85504e-05	0.109075	0.0174168	0.0174168	0.0972228	-0.0725	0.5111	0.6472	0.4087	0.4087	0.5619	BRD-K16478699	PLX-4720
CTSB	PC3	8.98562e-05	0.0257217	0.00224403	0.00224403	0.0169491	-0.0636	0.89455	0.7801	0.8589	0.8589	0.9302	BRD-K57631554	5-aminolevulinic-acid
CTSB	HA1E	9.01826e-05	0.00533739	2.95173e-06	2.95173e-06	0.0136612	-0.0725	1.0571	1.661	1.63	1.63	1.0405	BRD-K67844266	pevonedistat
CTSB	A375	9.05911e-05	0.64862	0.0482105	0.0482105	0.281492	-0.1133	0.5618	0.2375	0.4064	0.4064	0.5618	BRD-K56614220	clofazimine
CTSB	A375	9.05927e-05	0.00697949	1.22398e-05	1.22398e-05	0.027017	-0.1133	-1.1008	-1.6416	-1.3334	-1.3334	-1.0777	BRD-K16478699	PLX-4720
CTSB	HA1E	9.06327e-05	0.0347106	0.0133835	0.0133835	0.13709	-0.0725	0.5206	0.8316	0.4888	0.4888	0.5524	BRD-K79501723	cyclizine
CTSB	A549	9.23782e-05	0.363571	0.0300419	0.0300419	0.0391249	0	-0.45075	-0.224	-0.3489	-0.3489	-0.773	BRD-K85402309	dovitinib
CTSB	A375	9.42523e-05	0.94453	0.079112	0.079112	0.442899	-0.1133	0.5939	-0.3676	0.2984	0.2984	0.2984	BRD-A73741725	exemestane
CTSB	HA1E	9.50147e-05	0.124676	0.00103289	0.00103289	0.976836	-0.0725	0.6772	0.4364	0.6745	0.6745	0.2205	BRD-K91308639	ARN-509
CTSB	A375	9.51101e-05	0.0461289	0.0197246	0.0197246	0.0426082	-0.1133	0.58995	0.5861	0.3852	0.3852	0.9619	BRD-K52618540	inositol
CTSB	A375	9.5818e-05	0.603839	0.00509863	0.00509863	0.709243	-0.1133	-1.04455	-0.1985	-1.1066	-1.1066	-0.1848	BRD-K89274813	DMP-543
CTSB	PC3	9.63533e-05	0.0119456	0.000100274	0.000100274	0.212809	-0.0636	0.89405	0.9202	0.9202	0.9202	0.7126	BRD-K83699324	NMS-1286937
CTSB	HT29	9.66502e-05	0.0692628	0.120856	0.120856	0.0143405	-0.19715	-1.0516	-1.1152	-0.7565	-0.7565	-1.1561	BRD-K17203476	LY-2874455
CTSB	MCF7	9.84368e-05	0.00791096	0.0554407	0.0554407	0.260039	-0.2102	0.7461	1.0333	0.4443	0.4443	0.5835	BRD-K83508485	FK-888
CTSB	A375	9.90232e-05	0.0757854	0.0636754	0.0636754	0.135703	-0.1133	0.6462	1.5587	0.2003	0.2003	0.6462	BRD-K44844162	taselisib
CTSB	HT29	9.95786e-05	0.116378	0.0455221	0.0455221	0.0258301	-0.19715	0.696	1.0136	0.3331	0.3331	1.043	BRD-K26756394	VE-821
CTSB	MCF7	0.000100392	0.293271	0.0370011	0.0370011	0.0589465	-0.2102	0.44545	0	0.2725	0.2725	0.5005	BRD-A12994259	pomalidomide
CTSB	MCF7	0.000100696	0.0481948	0.000464341	0.000464341	0.155363	-0.2102	0.59845	0.6402	0.7751	0.7751	0.0807	BRD-A12237696	L-citrulline
CTSB	A375	0.000101239	0.086719	0.00710278	0.00710278	0.0925502	-0.1133	-0.8365	-1.9974	-0.8327	-0.8327	-1.4688	BRD-A03061970	alizapride
CTSB	A375	0.000101397	0.0272211	0.000751125	0.000751125	0.354977	-0.1133	0.7752	1.23	1.203	1.203	0.27155	BRD-K82135108	elesclomol
CTSB	A375	0.00010141	0.00661837	0.0107145	0.0107145	0.0128778	-0.1133	0.77585	1.2615	0.8975	0.8975	0.7814	BRD-K76401790	JNK-IN-5A
CTSB	HT29	0.00010259	0.332854	0.585052	0.585052	0.00466138	-0.19715	1.934	0.2758	0	0	3.2396	BRD-K93034159	cladribine
CTSB	HA1E	0.000102623	0.0662661	0.000693289	0.000693289	0.328632	-0.0725	-1.0575	-0.9313	-1.0575	-1.0575	-0.5577	BRD-K41434598	ORG-9768
CTSB	HT29	0.000102658	0.108225	0.0553184	0.0553184	0.0305111	-0.19715	0.7975	1.24615	0.39595	0.39595	1.4133	BRD-K87909389	alvocidib
CTSB	PC3	0.000103133	0.0316401	0.0355826	0.0355826	0.038596	-0.0636	0.8636	0.8884	0.65435	0.65435	0.8636	BRD-A48430263	pioglitazone
CTSB	A549	0.000103333	0.927487	0.130718	0.130718	0.43295	0	0.41015	-0.08805	0	0	0.2543	BRD-K11267252	alectinib
CTSB	HT29	0.000104043	0.0459823	0.0256946	0.0256946	0.101557	-0.19715	0.47745	1.0683	0.1953	0.1953	0.3695	BRD-K53508936	CTS-1027
CTSB	HA1E	0.000106233	0.501923	0.282495	0.282495	0.0183241	-0.0725	0.5337	0.3351	0.2719	0.2719	1.25465	BRD-K11153516	iniparib
CTSB	HT29	0.000108695	0.47588	0.0194372	0.0194372	0.236298	-0.19715	0.51505	-0.0247	0.5105	0.5105	0.3234	BRD-A29485665	bicalutamide
CTSB	A375	0.0001093	0.854216	0.0774854	0.0774854	0.352485	-0.1133	0.5461	-0.2832	0.33	0.33	0.2646	BRD-A07986123	galeterone
CTSB	MCF7	0.000109491	0.264841	0.254011	0.254011	0.110521	-0.2102	1.45365	1.4486	0.1093	0.1093	1.4587	BRD-K02389548	RG-2833
CTSB	MCF7	0.000109738	0.234796	0.00585222	0.00585222	0.0891218	-0.2102	0.35635	0.2577	0.4367	0.4367	0.2303	BRD-K37289225	clozapine
CTSB	PC3	0.000110272	0.083573	0.00273093	0.00273093	0.083573	-0.0636	-10.4661	-9.7262	-9.7262	-9.7262	-10.4661	BRD-A36057565	bruceantin
CTSB	A375	0.000110809	0.0221506	0.257367	0.257367	0.0915066	-0.1133	0.39995	0.41675	0.1977	0.1977	0.933	BRD-K77908580	entinostat
CTSB	A375	0.000110962	0.354665	0.00120088	0.00120088	0.0269318	-0.1133	-1.1727	-0.97665	-1.51065	-1.51065	-1.54145	BRD-K43164539	cholic-acid
CTSB	MCF7	0.000111589	0.00377094	0.462684	0.462684	0.00293662	-0.2102	2.2923	1.9119	-0.6237	-0.6237	2.4576	BRD-A28467416	PKI-179
CTSB	PC3	0.000111813	0.62643	0.0187282	0.0187282	0.088727	-0.0636	0.9545	-0.1128	0.5863	0.5863	1.0456	BRD-U86686840	AZD-7762
CTSB	HA1E	0.000112211	0.347236	0.0265509	0.0265509	0.41453	-0.0725	1.04965	0.3868	0.3868	0.3868	0.0885	BRD-K37385792	conivaptan
CTSB	A375	0.000112334	0.103379	0.247497	0.247497	0.00592834	-0.1133	0.61275	0.4022	0.0807	0.0807	1.2113	BRD-K44100512	KIN001-043
CTSB	HA1E	0.000112857	0.14629	0.0694515	0.0694515	0.0516702	-0.0725	0.72425	0.629	0.629	0.629	0.7225	BRD-A61767428	ursolic-acid
CTSB	HA1E	0.000113042	0.221726	0.00404218	0.00404218	0.0089829	-0.0725	0.8905	1.3834	0.8662	0.8662	1.2987	BRD-K43806473	camostat-mesilate
CTSB	HEPG2	0.000113413	0.0244466	0.00027929	0.00027929	0.131532	-0.2475	-1.41185	-1.4362	-1.5872	-1.5872	-0.7056	BRD-K41895714	AS-605240
CTSB	A375	0.000114181	0.202683	0.0419131	0.0419131	0.332701	-0.1133	-1.0002	-0.9814	-0.4468	-0.4468	-0.9814	BRD-K33882852	ZK-93423
CTSB	MCF7	0.000114478	0.875389	0.128182	0.128182	0.0273992	-0.2102	0.45335	-0.1114	0.3289	0.3289	0.44325	BRD-K82928847	ACY-1215
CTSB	MCF7	0.000115806	0.177732	0.0494454	0.0494454	0.10655	-0.2102	0.5488	0.4782	0.30075	0.30075	0.4468	BRD-K98453471	salirasib
CTSB	A375	0.000116015	0.00601763	8.91064e-05	8.91064e-05	0.214021	-0.1133	-1.3806	-1.6228	-1.6228	-1.6228	-0.707	BRD-K25433859	maprotiline
CTSB	A375	0.000118347	0.247538	0.00022881	0.00022881	0.0457023	-0.1133	-1.4368	-2.252	-1.4791	-1.4791	-2.1087	BRD-K70792160	10-DEBC
CTSB	A375	0.000120881	0.084773	0.000585198	0.000585198	0.0850802	-0.1133	-8.3974	-8.7709	-8.28875	-8.28875	-8.3974	BRD-A36057565	bruceantin
CTSB	HT29	0.000121349	0.101247	0.0106731	0.0106731	0.0307282	-0.19715	-0.8453	-0.8884	-0.7565	-0.7565	-1.139	BRD-A06935312	fusidic-acid
CTSB	PC3	0.000121908	0.539087	0.014962	0.014962	0.0635855	-0.0636	-1.3588	-0.2812	-1.1922	-1.1922	-2.2566	BRD-U22633929	XMD11-85H
CTSB	MCF7	0.000122073	0.0355582	0.000871959	0.000871959	0.314263	-0.2102	-0.99505	-1.8877	-1.5526	-1.5526	-0.4824	BRD-A14966924	alaproclate
CTSB	PC3	0.000122607	0.452276	0.0205877	0.0205877	0.252446	-0.0636	-0.9999	-0.2599	-0.578	-0.578	-0.8825	BRD-K93779381	ingenol-mebutate
CTSB	A375	0.000122656	0.979282	0.0527541	0.0527541	0.0375293	-0.1133	0.521	-0.1653	0.4492	0.4492	0.7844	BRD-K16508793	diazepam
CTSB	MCF7	0.000122887	0.603478	0.869819	0.869819	0.0032629	-0.2102	1.6278	0.03335	-0.3495	-0.3495	2.4976	BRD-K00152668	adarotene
CTSB	A549	0.000123023	0.00810034	0.000258725	0.000258725	0.00184513	0	-0.6051	-0.903	-0.69115	-0.69115	-1.1217	BRD-K70642949	GSK-2334470
CTSB	HT29	0.000123266	0.0295617	0.0165883	0.0165883	0.140931	-0.19715	1.4585	1.98955	1.84005	1.84005	0.4634	BRD-K13646352	midostaurin
CTSB	HCC515	0.000123911	0.265987	0.00191205	0.00191205	0.305514	-0.4432	0.2099	-0.1621	0.1121	0.1121	0.1094	BRD-K68407802	KIN001-055
CTSB	MCF7	0.00012409	0.0132657	0.00107246	0.00107246	0.629579	-0.2102	0.3864	0.75535	0.4547	0.4547	-0.5963	BRD-K11153516	iniparib
CTSB	HT29	0.000125592	0.0124539	0.0108844	0.0108844	0.312788	-0.19715	0.7378	1.4016	0.485	0.485	0.9097	BRD-K25114078	aminoguanidine
CTSB	A549	0.000126457	0.175134	0.310658	0.310658	0.106183	0	0.6376	0.4526	0.2499	0.2499	0.6745	BRD-K93918653	quizartinib
CTSB	MCF7	0.000127445	0.84659	0.000381885	0.000381885	0.00595583	-0.2102	-1.0986	-0.0672	-1.30995	-1.30995	-2.362	BRD-K19220233	JNK-9L
CTSB	A375	0.000129398	0.0193781	0.00583933	0.00583933	0.0197883	-0.1133	-0.8403	-1.067	-0.8403	-0.8403	-1.1002	BRD-K01174345	anamorelin
CTSB	HA1E	0.000129957	0.0117622	0.298827	0.298827	0.00710384	-0.0725	-1.6692	-1.6692	-1.018	-1.018	-2.3403	BRD-K56957086	dacinostat
CTSB	MCF7	0.000131336	0.0166348	0.0104402	0.0104402	0.338946	-0.2102	-1.192	-1.2433	-1.115	-1.115	-1.2025	BRD-A14886633	norgestrel
CTSB	A375	0.000132892	0.184392	0.00588474	0.00588474	0.0474834	-0.1133	0.64635	0.4506	0.6182	0.6182	0.6745	BRD-K34469523	levalbuterol
CTSB	HCC515	0.000133065	0.00287416	0.129994	0.129994	0.00287416	-0.4432	0.65285	2.6892	-0.1173	-0.1173	3.1326	BRD-K43389698	BMS-387032
CTSB	HT29	0.000133629	0.401229	0.102662	0.102662	0.142269	-0.19715	0.67365	0.5722	0.4877	0.4877	0.5093	BRD-K05870596	XMD-1499
CTSB	A375	0.000134302	0.0716775	0.00574421	0.00574421	0.159945	-0.1133	-0.79005	-0.9031	-0.7706	-0.7706	-0.5929	BRD-K95412502	istaroxime
CTSB	HT29	0.000135429	0.0434591	0.0470055	0.0470055	0.0383449	-0.19715	0.6751	0.6751	0.6319	0.6319	0.9926	BRD-A26423207	sparfloxacin
CTSB	HEPG2	0.000135729	0.227429	0.0209952	0.0209952	0.213263	-0.2475	1.15205	0.9027	0.6805	0.6805	1.4358	BRD-K68407802	KIN001-055
CTSB	HT29	0.000135934	0.0697944	0.00489962	0.00489962	0.264799	-0.19715	0.7323	0.4957	0.4999	0.4999	0.7733	BRD-K43966364	penicillin-v-potassium
CTSB	A549	0.000137677	0.0708602	0.0974155	0.0974155	0.0180339	0	-0.399	-0.70155	-0.216	-0.216	-0.44125	BRD-K97056771	GNF-2
CTSB	HEPG2	0.000137978	0.0475671	0.00424579	0.00424579	0.191392	-0.2475	0.231	0.5545	0.5545	0.5545	0.1531	BRD-K12184916	NVP-BEZ235
CTSB	A375	0.000138149	0.0259177	0.00129365	0.00129365	0.401008	-0.1133	-0.79385	-0.9288	-0.8499	-0.8499	-0.199	BRD-K35687421	gimeracil
CTSB	HT29	0.000139065	0.0654177	0.395044	0.395044	0.00705636	-0.19715	1.45905	1.4611	0.0088	0.0088	1.8308	BRD-K36363294	I-BET-151
CTSB	PC3	0.000139643	0.0195111	4.3249e-05	4.3249e-05	0.736789	-0.0636	1.62305	2.0171	2.15435	2.15435	0.32875	BRD-K88510285	bortezomib
CTSB	HCC515	0.000140345	0.875901	0.0185162	0.0185162	0.0722882	-0.4432	0.35455	-0.2837	-0.0323	-0.0323	1.9699	BRD-K78790801	KIN001-269
CTSB	PC3	0.000140599	0.67172	0.00783348	0.00783348	0.00731478	-0.0636	0.96215	0.3738	0.8014	0.8014	1.2492	BRD-A11319535	beclomethasone-dipropionate
CTSB	A375	0.000141188	0.0795045	0.0248884	0.00464042	0.00224554	-0.1133	-0.83095	-0.61395	-0.8061	-0.7443	-1.03055	BRD-K92758126	MD-920
CTSB	A375	0.000141644	0.0799988	0.110872	0.110872	0.0709089	-0.1133	-0.8436	-0.6825	-0.6745	-0.6745	-1.0629	BRD-A92826379	lupanine
CTSB	HA1E	0.000146997	0.00326684	0.00288147	0.00288147	0.00328767	-0.0725	1.1018	2.4844	1.174	1.174	3.0022	BRD-K12867552	PCI-24781
CTSB	HT29	0.000147432	0.178989	0.320332	0.320332	0.041496	-0.19715	0.63435	0.3646	0.3646	0.3646	0.5964	BRD-K68346641	amsacrine
CTSB	HCC515	0.000151302	0.00368226	0.018752	0.018752	0.00394842	-0.4432	0.46305	1.3885	0.607	0.607	1.2604	BRD-K40175214	torin-1
CTSB	A375	0.000151408	0.26793	0.181514	0.181514	0.0108682	-0.1133	0.3925	0.247	0.247	0.247	1.0299	BRD-K58772419	AZD-6482
CTSB	A375	0.000152145	0.514929	0.127662	0.127662	0.249145	-0.1133	0.75795	0.5386	0.5386	0.5386	0.236	BRD-U70626184	BI-2536
CTSB	MCF7	0.000154143	0.252482	0.0122548	0.0122548	0.166956	-0.2102	0.4501	0.1074	0.4667	0.4667	0.3958	BRD-K19352500	prochlorperazine
CTSB	HT29	0.000155292	0.0965013	0.00582037	0.00582037	0.13802	-0.19715	0.666	0.6555	0.666	0.666	0.4102	BRD-K25650355	physostigmine
CTSB	HT29	0.000157283	0.0418427	0.010474	0.010474	0.0328109	-0.19715	0.46805	1.078	0.4492	0.4492	2.8191	BRD-K50398167	meclofenamic-acid
CTSB	HT29	0.000157537	0.0175723	0.00559127	0.00559127	0.132466	-0.19715	0.68275	1.5425	0.6814	0.6814	0.8905	BRD-K18324993	budipine
CTSB	MCF7	0.000158639	0.267556	0.184637	0.184637	0.0190007	-0.2102	0.69125	0.8859	0.2938	0.2938	0.7777	BRD-K09426783	TAS-103
CTSB	A375	0.000164422	0.017206	0.000340158	0.000340158	0.22656	-0.1133	-0.6106	-1.2434	-1.2434	-1.2434	-0.3873	BRD-K11071038	ICI-162846
CTSB	HA1E	0.000166641	0.00790709	0.00777279	0.00777279	0.771168	-0.0725	0.8172	1.3691	0.8726	0.8726	0.0643	BRD-K88807631	elacridar
CTSB	A375	0.000167521	0.207717	0.972813	0.972813	0.0571589	-0.1133	0.63715	0.2741	-0.1557	-0.1557	0.81425	BRD-K19687926	lapatinib
CTSB	MCF7	0.000169367	0.819462	0.745313	0.745313	0.00525187	-0.2102	0.97535	-0.3305	-0.3305	-0.3305	1.3132	BRD-K14109347	LY-2603618
CTSB	A375	0.00017029	0.102448	0.00708483	0.00708483	0.00807725	-0.1133	0.54835	0.429	0.4438	0.4438	1.5716	BRD-K83508485	FK-888
CTSB	HEPG2	0.000175196	0.00456726	6.28661e-05	6.28661e-05	0.418427	-0.2475	-1.6491	-2.6807	-2.2655	-2.2655	-0.8	BRD-K99964838	bosutinib
CTSB	HT29	0.000175398	0.288794	0.255043	0.255043	0.0141256	-0.19715	0.6425	0.2506	0.1821	0.1821	1.005	BRD-K68747584	PF-03814735
CTSB	HCC515	0.000177997	0.0163928	0.00657614	0.00657614	0.951936	-0.4432	0.32225	1.0583	0.6186	0.6186	-0.4861	BRD-K74514084	pazopanib
CTSB	PC3	0.000179001	0.128576	0.00131011	0.00131011	0.129331	-0.0636	0.68895	0.6626	0.8077	0.8077	0.3843	BRD-K13356952	methazolamide
CTSB	A375	0.000179372	0.0179301	0.170748	0.170748	0.107044	-0.1133	0.4438	0.3967	0.25145	0.25145	0.3611	BRD-K60866521	idelalisib
CTSB	HEPG2	0.000182872	0.878218	0.250067	0.250067	0.166226	-0.2475	0.54275	-0.1678	0.1403	0.1403	0.8801	BRD-K50168500	canertinib
CTSB	MCF7	0.000183735	0.0763333	0.298432	0.298432	0.0504767	-0.2102	0.1076	0.1076	0	0	0.32555	BRD-K05104363	PD-184352
CTSB	A375	0.000183795	0.220965	0.178305	0.178305	0.108457	-0.1133	0.62295	0.4732	0.4186	0.4186	0.5399	BRD-K39974922	lenvatinib
CTSB	A375	0.000184379	0.0132733	0.00868556	0.00868556	0.0102149	-0.1133	-1.0908	-1.2092	-0.9976	-0.9976	-1.352	BRD-A93424738	dexamethasone-acetate
CTSB	HA1E	0.000184401	0.826595	0.916304	0.916304	0.0340847	-0.0725	0.77835	0.01835	0.0347	0.0347	1.2919	BRD-K54256913	MK-1775
CTSB	MCF7	0.000184643	0.990283	0.169621	0.169621	0.128266	-0.2102	0.2792	0.0584	0.2624	0.2624	0.2357	BRD-K62196610	AVN-944
CTSB	A375	0.000185405	0.313509	0.00728541	0.00728541	0.87425	-0.1133	-0.73855	-0.5272	-0.586	-0.586	-0.098	BRD-K35589454	danegaptide
CTSB	MCF7	0.00018639	0.127657	0.00768662	0.00768662	0.0195124	-0.2102	0.5751	0.4832	0.50715	0.50715	0.6447	BRD-A07986123	galeterone
CTSB	A375	0.000189113	0.430477	0.254023	0.254023	0.079158	-0.1133	-0.95235	-0.3892	-0.3892	-0.3892	-0.7898	BRD-K17026858	pibenzimol
CTSB	HT29	0.000189169	0.219349	0.00368268	0.00368268	0.112634	-0.19715	-0.89565	-0.7183	-0.8459	-0.8459	-0.916	BRD-K81144366	moxisylyte
CTSB	HA1E	0.000189338	0.0129284	4.46958e-05	4.46958e-05	0.0545125	-0.0725	1.0564	1.1855	1.1071	1.1071	-1.1101	BRD-K09426783	TAS-103
CTSB	A375	0.000190314	0.0148436	0.000487684	0.000487684	0.00677674	-0.1133	-1.4984	-1.7015	-1.7487	-1.7487	-1.5662	BRD-K41599323	lonafarnib
CTSB	HT29	0.000191752	0.155188	0.323393	0.323393	0.0358767	-0.19715	1.0849	1.0972	-0.1465	-0.1465	1.5521	BRD-K85140930	aphidicolin
CTSB	A375	0.000192193	0.264139	0.012379	0.012379	0.0797458	-0.1133	0.6167	0.5566	0.6492	0.6492	0.6167	BRD-K82484347	GSK-J2
CTSB	A375	0.0001968	0.311757	0.0121673	0.0121673	0.974987	-0.1133	0.3817	0.1753	0.3346	0.3346	0.1004	BRD-K51313569	palbociclib
CTSB	HCC515	0.000198475	0.0385895	0.00385029	0.00385029	0.526805	-0.4432	0.1911	0.4627	0.0479	0.0479	0.1911	BRD-K11153516	iniparib
CTSB	HEPG2	0.000201744	0.825533	0.383485	0.383485	0.0203446	-0.2475	0.34095	-0.868	0.0858	0.0858	0.8559	BRD-A29901043	KIN001-127
CTSB	A375	0.000202425	0.0988923	0.0340797	0.0340797	0.233407	-0.1133	0.6212	0.5894	0.3016	0.3016	0.653	BRD-K07106112	BMS-599626
CTSB	MCF7	0.000203707	0.925968	0.456685	0.456685	0.00674717	-0.2102	0.6176	-0.1028	-0.1028	-0.1028	1.3027	BRD-K53665955	MK-5108
CTSB	PC3	0.000206468	0.109998	0.0340195	0.0340195	0.0785566	-0.0636	0.59875	0.3865	0.3865	0.3865	0.9549	BRD-K67277431	picotamide
CTSB	A549	0.000207275	0.000207275	NA	0.000207275	0.000207275	0	1.69025	1.69025	NA	1.69025	1.69025	BRD-K17953061	staurosporine
CTSB	A375	0.000208225	0.275408	0.0119171	0.0119171	0.189796	-0.1133	0.71895	0.9351	0.5028	0.5028	0.1494	BRD-K93208532	apremilast
CTSB	A375	0.000208557	0.113506	0.0744059	0.0744059	0.123083	-0.1133	0.5192	0.5192	0.2673	0.2673	0.3981	BRD-K00494077	trovafloxacin
CTSB	A549	0.000208792	0.00299825	0.00929644	0.00929644	0.00293	0	1.21615	2.2411	0.6745	0.6745	2.2411	BRD-K40175214	torin-1
CTSB	MCF7	0.000209338	0.397447	0.209343	0.209343	0.0153007	-0.2102	1.11295	0.5271	0.0784	0.0784	2.91355	BRD-K61443650	thiomersal
CTSB	HA1E	0.00021155	0.206485	0.0437053	0.0437053	0.0901903	-0.0725	0.71875	0.3351	0.4149	0.4149	1.157	BRD-A37288617	amfepramone
CTSB	A375	0.000213201	0.116669	0.00435798	0.00435798	0.197863	-0.1133	-0.8029	-0.6393	-0.7634	-0.7634	-1.0788	BRD-K68693535	lidamidine
CTSB	HT29	0.000213475	0.0503454	0.0127439	0.0127439	0.0236451	-0.19715	0.8141	0.5849	0.5849	0.5849	0.9801	BRD-K09991945	GSK-3-inhibitor-II
CTSB	HT29	0.000214153	0.132466	0.0522779	0.0522779	0.263531	-0.19715	0.75325	0.5994	0.5994	0.5994	0.2764	BRD-K95435023	PHA-665752
CTSB	MCF7	0.000214771	0.117329	0.389763	0.389763	0.0767333	-0.2102	0.5176	0.5176	0.1315	0.1315	0.5176	BRD-K55026842	azacitidine
CTSB	A375	0.000220944	0.499244	0.189112	0.189112	0.066148	-0.1133	0.8673	0.4674	0.66735	0.66735	1.9012	BRD-K07798980	PSI-6130
CTSB	PC3	0.000221553	0.111002	0.302759	0.302759	0.0173214	-0.0636	-1.26095	-1.0451	-0.1876	-0.1876	-2.0458	BRD-K07881437	danusertib
CTSB	HCC515	0.000222107	0.512591	0.0528435	0.0528435	0.00314205	-0.4432	0.2391	-0.1263	-0.0588	-0.0588	1.5393	BRD-A58767537	afatinib
CTSB	HA1E	0.000222149	0.0464106	0.0232434	0.0232434	0.564093	-0.0725	0.73555	0.5978	0.5743	0.5743	-0.7742	BRD-A73741725	exemestane
CTSB	MCF7	0.000223976	0.886657	0.0148694	0.0148694	0.808336	-0.2102	0.4495	-0.2364	0.3993	0.3993	-0.10275	BRD-K57252450	cilengitide
CTSB	MCF7	0.000225095	0.0415606	0.00512008	0.00512008	0.176141	-0.2102	0.3665	0.6745	0.589	0.589	0.3006	BRD-K31495718	AZD-7687
CTSB	A375	0.000226475	0.0430102	0.021278	0.021278	0.199232	-0.1133	-0.663	-1.3683	-0.5506	-0.5506	-0.5062	BRD-K05658747	raltegravir
CTSB	A375	0.000229324	0.639134	0.0144019	0.0144019	0.298691	-0.1133	0.7066	-0.2832	0.5882	0.5882	0.7858	BRD-K11717138	benzbromarone
CTSB	MCF7	0.000229483	0.0163782	0.185336	0.185336	0.403672	-0.2102	0.2076	0.52705	0.02775	0.02775	-0.2454	BRD-K77908580	entinostat
CTSB	MCF7	0.000232611	0.245263	0.0563336	0.0563336	0.0739208	-0.2102	0.7708	0.1978	0.2844	0.2844	0.5862	BRD-K42898655	temsirolimus
CTSB	HT29	0.000235446	0.190102	0.0471776	0.0471776	0.0320508	-0.19715	0.7403	0.5475	0.2849	0.2849	0.8077	BRD-K63630713	etacrynic-acid
CTSB	A549	0.000235883	0.000590945	7.81676e-08	7.81676e-08	0.725175	0	0.6745	0.94825	1.07055	1.07055	0.24775	BRD-K93123848	RAF-265
CTSB	MCF7	0.000235883	0.0719028	0.928093	0.928093	0.00376011	-0.2102	1.09775	0.4367	-0.2129	-0.2129	1.7474	BRD-K41213548	KW-2478
CTSB	A549	0.000236992	0.0242116	0.0456352	0.0364621	0.0712283	0	0.4094	0.6745	0.3489	0.4078	0.6745	BRD-K83189926	UNC-1215
CTSB	HCC515	0.000238958	0.164811	0.0215251	0.0215251	0.604584	-0.4432	0.55915	1.1681	0.7786	0.7786	0	BRD-A29901043	KIN001-127
CTSB	HA1E	0.000240301	0.428458	0.191482	0.191482	0.222844	-0.0725	0.5635	0.1618	0.1819	0.1819	0.3582	BRD-K12040459	AT7867
CTSB	A375	0.000240335	0.00316101	0.00579911	0.00579911	0.00294723	-0.1133	1.3502	2.2794	0.4561	0.4561	2.955	BRD-U61997977	WZ-4-145
CTSB	A375	0.000240522	0.146965	0.52764	0.52764	0.0133098	-0.1133	0.65885	0.4932	-0.1457	-0.1457	1.0493	BRD-K77947974	fluspirilene
CTSB	HT29	0.000241922	0.212015	0.276771	0.276771	0.0173861	-0.19715	0.43405	0.34685	0.03005	0.03005	0.82485	BRD-K40175214	torin-1
CTSB	HT29	0.000242211	0.0701761	0.277957	0.277957	0.0682846	-0.19715	0.7334	0.8066	0.0597	0.0597	0.8232	BRD-K02389548	RG-2833
CTSB	A375	0.000242784	0.0371267	0.0540449	0.0540449	0.234949	-0.1133	0.72315	0.657	0.5092	0.5092	0.8841	BRD-A28467416	PKI-179
CTSB	HT29	0.000244506	0.0372057	0.0682727	0.0682727	0.00520645	-0.19715	1.33625	1.8399	0.5321	0.5321	2.7129	BRD-K43389698	BMS-387032
CTSB	PC3	0.000248885	0.323394	0.0790935	0.0790935	0.0052609	-0.0636	0.89545	0.3066	0.3281	0.3281	1.8336	BRD-K50590187	capsaicin
CTSB	HA1E	0.000250459	0.0181432	0.111696	0.111696	0.0214492	-0.0725	1.4792	2.28115	0.6745	0.6745	1.73625	BRD-K68174511	torin-2
CTSB	HA1E	0.000250525	0.0701979	0.445308	0.445308	0.579636	-0.0725	0.2557	0.3124	0.0219	0.0219	0.01015	BRD-K42191735	buparlisib
CTSB	PC3	0.000251515	0.511237	0.0291057	0.0291057	0.542063	-0.0636	0.6861	0.24705	0.5724	0.5724	0.3482	BRD-K34022604	clofarabine
CTSB	HT29	0.000254052	0.0326496	0.0059123	0.0059123	0.158662	-0.19715	-0.9289	-1.0161	-0.9289	-0.9289	-1.0976	BRD-A06916187	CPI-613
CTSB	HT29	0.000254292	0.0635621	0.0365076	0.0365076	0.194652	-0.19715	-0.8581	-0.8244	-0.8244	-0.8244	-0.6035	BRD-K01674964	histamine
CTSB	MCF7	0.000255071	0.0791688	0.0570166	0.0570166	0.338946	-0.2102	0.6921	0.88	0.5042	0.5042	0.3765	BRD-K87782578	AVL-292
CTSB	HT29	0.000255891	0.0763556	0.00380511	0.00380511	0.113758	-0.19715	0.3143	0.4662	0.4662	0.4662	0.1624	BRD-K98530306	clonidine
CTSB	HCC515	0.00026256	0.645312	0.0956494	0.0956494	0.318628	-0.4432	0.0893	-0.1737	-0.0588	-0.0588	0.6669	BRD-K99545815	PF-562271
CTSB	A549	0.000262711	0.656285	0.962505	0.962505	0.0824634	0	0.5692	0.2649	0.1821	0.1821	0.62185	BRD-K52560704	methylstat
CTSB	HA1E	0.000262893	0.00943238	0.133619	0.133619	0.654627	-0.0725	1.1188	1.1897	1.024	1.024	0.528	BRD-K16485616	mocetinostat
CTSB	PC3	0.000263135	0.755194	0.366367	0.366367	0.020787	-0.0636	0.465	0.29505	-0.0992	-0.0992	2.3626	BRD-K88378636	withaferin-a
CTSB	A375	0.000265096	0.665624	0.104188	0.104188	0.428474	-0.1133	0.5529	0.5373	0.4241	0.4241	0.3109	BRD-K43802723	AMG-837
CTSB	A375	0.000265697	0.757187	0.0958753	0.0958753	0.0787402	-0.1133	-0.67045	0.0803	-0.4644	-0.4644	-0.7141	BRD-A70998768	pinaverium
CTSB	HA1E	0.00026619	0.411441	0.0309127	0.0309127	0.126499	-0.0725	-0.99225	-0.183	-0.9838	-0.9838	-0.7736	BRD-K59524082	maribavir
CTSB	PC3	0.000267998	0.228069	0.00616033	0.00616033	0.532884	-0.0636	0.2475	0.2475	0.2475	0.2475	0.03145	BRD-K49865102	PD-0325901
CTSB	HCC515	0.000268218	0.080467	0.00332822	0.00332822	0.748548	-0.4432	0.27495	0.4541	0.1276	0.1276	-0.8034	BRD-U86686840	AZD-7762
CTSB	HEPG2	0.000271057	0.641887	0.0706601	0.0706601	0.17632	-0.2475	0.18415	-0.0224	0.0862	0.0862	-0.0125	BRD-K80700417	SGI-1776
CTSB	HA1E	0.000271418	0.0110894	0.00067736	0.00067736	0.131964	-0.0725	0.5803	1.2591	0.7322	0.7322	0.3332	BRD-A15435692	BMY-14802
CTSB	A375	0.000271734	0.0993942	0.000636884	0.000636884	0.422215	-0.1133	-0.7101	-0.7052	-0.8782	-0.8782	-0.5652	BRD-K91822704	torcitabine
CTSB	HA1E	0.000276958	0.35563	0.309373	0.309373	0.0545744	-0.0725	0.8615	-0.491	0.1134	0.1134	0.827	BRD-K23228615	GDC-0980
CTSB	MCF7	0.000277255	0.324994	0.204937	0.204937	0.00294215	-0.2102	-1.0488	-0.58865	-0.416	-0.416	-1.3271	BRD-K04853698	LDN-193189
CTSB	MCF7	0.000280342	0.252299	0.838228	0.838228	0.0127527	-0.2102	0.3019	0.26265	-0.24815	-0.24815	0.58295	BRD-K49075727	nintedanib
CTSB	MCF7	0.000282367	0.141563	0.00492658	0.00492658	0.658891	-0.2102	0.41215	0.10125	0.3402	0.3402	0.00795	BRD-K40738845	BMS-777607
CTSB	A375	0.000285735	0.506427	0.0193558	0.0193558	0.156191	-0.1133	0.49055	0.6829	0.6829	0.6829	0.385	BRD-K69688083	mestinon
CTSB	HCC515	0.00028589	0.00405265	0.000154975	0.000154975	0.00519671	-0.4432	0.926	1.6601	0.9703	0.9703	1.9372	BRD-K09951645	dabrafenib
CTSB	A375	0.000289954	0.334907	0.0419131	0.0419131	0.980064	-0.1133	-1.04225	-1.3604	-0.6896	-0.6896	-0.3134	BRD-K55026842	azacitidine
CTSB	A375	0.000291523	0.0375743	0.000936608	0.000936608	0.248341	-0.1133	0.56155	0.787	0.7493	0.7493	0.192	BRD-K60219430	serdemetan
CTSB	PC3	0.000292195	0.112858	0.0184259	0.0160778	0.0664345	-0.0636	-0.7154	-0.59575	-1.0835	-0.77735	-0.55105	BRD-K36363294	I-BET-151
CTSB	HA1E	0.000293318	0.037415	0.0273211	0.0273211	0.165648	-0.0725	0.6064	0.8342	0.5674	0.5674	0.1737	BRD-K37590257	GSK-256066
CTSB	HA1E	0.000294254	0.00327724	0.115301	0.115301	0.00362627	-0.0725	1.6694	2.4187	0.0272	0.0272	3.1643	BRD-A19952358	closantel
CTSB	A375	0.000295821	0.186344	0.0083181	0.0083181	0.0461824	-0.1133	-0.78345	-0.6642	-0.8728	-0.8728	-1.0075	BRD-A02990301	lofexidine
CTSB	A375	0.000304039	0.0193273	0.0411853	0.0411853	0.678135	-0.1133	0.5891	0.865	0.36575	0.36575	0.338	BRD-K42191735	buparlisib
CTSB	MCF7	0.000307561	0.121504	0.164429	0.164429	0.156547	-0.2102	0.5177	0.3804	0.2508	0.2508	0.8249	BRD-K86892782	edoxudine
CTSB	HA1E	0.000307941	0.645063	0.115677	0.115677	0.0242928	-0.0725	0.782	0	0.2987	0.2987	0.9254	BRD-A73908300	EX-527
CTSB	HA1E	0.000310588	0.985573	0.180845	0.180845	0.0332992	-0.0725	0.57525	-0.1826	0.33105	0.33105	0.57525	BRD-K11267252	alectinib
CTSB	A375	0.000311463	0.0107316	8.88248e-05	8.88248e-05	0.044339	-0.1133	-0.9501	-2.0565	-1.7473	-1.7473	-0.9501	BRD-K29673530	hypericin
CTSB	HA1E	0.000317229	0.0758136	0.00925051	0.00925051	0.0272382	-0.0725	0.5163	0.34775	0.53025	0.53025	1.10435	BRD-K12787259	CX-5461
CTSB	HA1E	0.000319298	0.405859	0.257034	0.257034	0.0208312	-0.0725	-1.1945	0.5483	-0.5606	-0.5606	-1.2022	BRD-K85751432	refametinib
CTSB	MCF7	0.000320198	0.00279314	0.00145898	0.00145898	0.0027849	-0.2102	1.9224	4.4969	3.342	3.342	6.201	BRD-K52020312	metronidazole
CTSB	PC3	0.000322005	0.0443103	0.000944528	0.000944528	0.0416031	-0.0636	0.8825	1.09015	1.2863	1.2863	1.07805	BRD-K48168960	propylthiouracil
CTSB	HA1E	0.00032226	0.0629907	0.236441	0.236441	0.304156	-0.0725	0.5241	0.5756	0.2153	0.2153	0.4603	BRD-K93788137	PF-431396
CTSB	PC3	0.000324439	0.699793	0.00935569	0.00935569	0.197323	-0.0636	0.7086	-0.31395	0.7537	0.7537	0.73345	BRD-K23984367	sorafenib
CTSB	MCF7	0.000324975	0.0797875	0.410589	0.410589	0.0793231	-0.2102	0.57945	0.4698	0.2286	0.2286	0.5499	BRD-K33882852	ZK-93423
CTSB	HEPG2	0.000326456	0.295692	0.0199893	0.0199893	0.0375004	-0.2475	-1.3038	-1.056	-1.2885	-1.2885	-1.98685	BRD-K05804044	AZ-628
CTSB	HT29	0.000327031	0.259193	0.264105	0.264105	0.000501024	-0.19715	0.7961	-0.54505	-0.37115	-0.37115	1.3308	BRD-K85606544	neratinib
CTSB	PC3	0.000329528	0.0309377	0.0976053	0.0220811	0.0126803	-0.0636	-0.7418	-0.81045	-0.6169	-0.6379	-0.9029	BRD-K54606188	JQ1-(+)
CTSB	PC3	0.000332279	0.375068	0.00807979	0.00807979	0.0383581	-0.0636	-0.73835	-0.2147	-0.50265	-0.50265	-1.4119	BRD-K19687926	lapatinib
CTSB	HT29	0.000333271	0.460728	0.108113	0.108113	0.149108	-0.19715	0.5173	-0.1699	0.3268	0.3268	0.3335	BRD-K00494077	trovafloxacin
CTSB	PC3	0.000337412	0.642097	0.0959841	0.0959841	0.0507573	-0.0636	0.79895	-0.1711	0.509	0.509	0.9212	BRD-A10523515	GSK-429286A
CTSB	PC3	0.000339784	0.448677	0.0337289	0.0337289	0.152348	-0.0636	0.54985	0.4958	0.4958	0.4958	0.5806	BRD-K67578145	GDC-0879
CTSB	MCF7	0.000343037	0.844594	0.359968	0.359968	0.0487189	-0.2102	0.2856	-0.14505	-0.11825	-0.11825	0.23565	BRD-K28392481	AZD-4547
CTSB	A549	0.00034476	0.0132676	0.476667	0.476667	0.00398264	0	1.0804	1.0804	0.2265	0.2265	2.9104	BRD-K92571446	WZ-3105
CTSB	MCF7	0.000345	0.0310781	0.0160755	0.0160755	0.0699302	-0.2102	0.61465	1.5414	0.3692	0.3692	1.5891	BRD-K30632436	CTB
CTSB	MCF7	0.000345971	0.0181887	0.0441765	0.0441765	0.148149	-0.2102	-1.0592	-1.497	-0.988	-0.988	-0.9749	BRD-K15318383	ammonium-glycyrrhizinate
CTSB	HT29	0.000348199	0.405121	0.0555528	0.0555528	0.835997	-0.19715	0.97115	0.5495	0.7529	0.7529	-0.1677	BRD-K49350383	thioguanine
CTSB	PC3	0.000348618	0.35287	0.0138236	0.0138236	0.0778801	-0.0636	-0.85005	-1.1379	-1.0051	-1.0051	-0.9573	BRD-A74914197	pralatrexate
CTSB	HA1E	0.000350364	0.0583294	0.00586697	0.00586697	0.120857	-0.0725	-0.77605	-0.8872	-0.8872	-0.8872	-0.7726	BRD-K54006094	formoterol
CTSB	MCF7	0.000352093	0.0417414	0.00737347	0.00737347	0.306945	-0.2102	0.45625	0.5135	0.7252	0.7252	-0.079	BRD-K31111078	dimethyl-fumarate
CTSB	MCF7	0.000353825	0.706109	0.575883	0.575883	0.0379141	-0.2102	0.59905	-0.2127	-0.084	-0.084	0.5276	BRD-K66175015	afatinib
CTSB	HCC515	0.000355959	0.0586976	0.143646	0.143646	0.0110056	-0.4432	0.34655	0.3876	0.1639	0.1639	0.8461	BRD-K12787259	CX-5461
CTSB	A375	0.000356027	0.105682	0.107622	0.107622	0.057802	-0.1133	0.6148	0.6971	0.0815	0.0815	0.4834	BRD-K00674894	orteronel
CTSB	HT29	0.000356054	0.0761099	0.00807476	0.00807476	0.460728	-0.19715	0.3927	0.4042	0.4042	0.4042	-0.0443	BRD-K11196887	norfloxacin
CTSB	MCF7	0.000359872	0.0155282	0.155679	0.155679	0.107555	-0.2102	0.465	1.31345	0.2103	0.2103	0.99685	BRD-A18328003	GDC-0980
CTSB	HEPG2	0.000362234	0.510144	0.200171	0.200171	0.122822	-0.2475	0.59545	-0.2187	-0.2187	-0.2187	0.8723	BRD-K03406345	azacitidine
CTSB	MCF7	0.000362435	0.00183382	0.00454664	0.00454664	0.466061	-0.2102	0.5626	1.23095	0.4018	0.4018	0.2887	BRD-K13390322	AT-7519
CTSB	A375	0.00036333	0.345073	0.0416857	0.0416857	0.708439	-0.1133	0.5487	0.5487	0.4258	0.4258	0.0301	BRD-K19412355	SB-242235
CTSB	MCF7	0.000365408	0.0866887	0.355609	0.355609	0.0164515	-0.2102	-0.8945	-0.7021	-0.6975	-0.6975	-1.3079	BRD-K37694030	doxepin
CTSB	HT29	0.000366578	0.349645	0.134969	0.134969	0.125494	-0.19715	0.56285	0.2092	0.2599	0.2599	0.2591	BRD-K97963946	EMD-1214063
CTSB	HT29	0.000368967	0.111964	0.00777367	0.00777367	0.062378	-0.19715	0.6053	0.7685	0.6053	0.6053	1.25995	BRD-K18895904	olanzapine
CTSB	A549	0.000369037	0.720499	0.303677	0.303677	0.00176866	0	0.4381	0.21295	0.2247	0.2247	0.9137	BRD-A92800748	tie2-kinase-inhibitor
CTSB	HCC515	0.000369607	0.476252	0.027379	0.027379	0.0287901	-0.4432	0.20665	-0.1239	0.192	0.192	0.5894	BRD-K66847579	WZ-7043
CTSB	PC3	0.000369787	0.0770411	0.0047734	0.0047734	0.00275791	-0.0636	0.76535	0.5747	0.7212	0.7212	4.2643	BRD-K19416115	sitagliptin
CTSB	PC3	0.000370176	0.0535659	0.0131675	0.0131675	0.394777	-0.0636	1.2792	0.97095	1.3849	1.3849	0.57285	BRD-K68164687	epothilone-b
CTSB	PC3	0.000370934	0.225744	0.481181	0.481181	0.0984986	-0.0636	1.147	0.9315	-0.139	-0.139	1.979	BRD-K66175015	afatinib
CTSB	HCC515	0.000372698	0.0452006	0.021171	0.021171	0.0853262	-0.4432	0.08145	0.2222	0.0652	0.0652	0.2222	BRD-K51313569	palbociclib
CTSB	MCF7	0.00037472	0.197352	0.0102388	0.0102388	0.0913496	-0.2102	-1.26785	-0.9234	-1.2867	-1.2867	-1.2879	BRD-K43457670	acetazolamide
CTSB	A375	0.000375756	0.162878	0.0360355	0.0360355	0.074661	-0.1133	0.4354	0.4614	0.2374	0.2374	1.0144	BRD-K63861289	molsidomine
CTSB	A375	0.000376116	0.0290197	0.307242	0.307242	0.0206819	-0.1133	0.6639	0.70225	0.231	0.231	0.8556	BRD-K56301217	ABT-737
CTSB	PC3	0.000376427	0.980065	0.00892053	0.00892053	0.226318	-0.0636	0.7843	-0.0897	0.8185	0.8185	0.4206	BRD-A49765801	fludroxycortide
CTSB	HA1E	0.000377002	0.167913	0.0251709	0.0251709	0.143846	-0.0725	-0.77555	-0.7578	-0.7578	-0.7578	-0.6384	BRD-K65991129	SB-705498
CTSB	HCC515	0.000377401	0.0106653	0.00355372	0.00355372	0.713521	-0.4432	0.14915	1.1784	0.1094	0.1094	-0.4105	BRD-K44227013	ponatinib
CTSB	HT29	0.000378838	0.0216787	0.173089	0.173089	0.0635621	-0.19715	0.7102	0.8941	0.5582	0.5582	0.8941	BRD-A33280134	etoposide
CTSB	A375	0.000380717	0.232443	0.00311001	0.00311001	0.0708882	-0.1133	-0.5184	-0.4303	-0.5129	-0.5129	-0.91945	BRD-K21718444	KW-2449
CTSB	PC3	0.00038322	0.240276	0.00012986	0.00012986	7.22767e-06	-0.0636	0.44615	-0.5155	-0.7928	-0.7928	2.284	BRD-K21680192	mitoxantrone
CTSB	HEPG2	0.000385072	0.634207	0.557156	0.557156	0.014542	-0.2475	0.4234	0.0823	-0.0107	-0.0107	0.6365	BRD-K44100512	KIN001-043
CTSB	HEPG2	0.000391535	0.203541	0.268928	0.268928	0.100486	-0.2475	0.44165	0.6219	0.0187	0.0187	0.5747	BRD-K07859598	GW-5074
CTSB	HT29	0.000392676	0.296498	0.0825559	0.0825559	0.156195	-0.19715	1.0136	0.0985	0.487	0.487	0.6674	BRD-A51964809	halofantrine
CTSB	A375	0.000395	0.0626146	0.00452736	0.00452736	0.429617	-0.1133	0.5225	0.5225	0.5225	0.5225	0	BRD-K22749967	ABT-239
CTSB	PC3	0.00039702	0.122654	0.412419	0.412419	0.00281259	-0.0636	0.7679	0.4802	0.2615	0.2615	3.6289	BRD-A24396574	celastrol
CTSB	HT29	0.000399314	0.0908916	0.00203355	0.00203355	0.498797	-0.19715	0.5048	0.6652	0.7397	0.7397	0.181	BRD-A07704283	isofloxythepin
CTSB	MCF7	0.00040316	0.0297644	0.00520735	0.00520735	0.0397018	-0.2102	0.5196	1.928	0.2842	0.2842	1.1596	BRD-K00674894	orteronel
CTSB	MCF7	0.000408518	0.0669874	0.00088178	0.00088178	0.865326	-0.2102	0.34525	0.3289	0.5613	0.5613	-0.005	BRD-K82484347	GSK-J2
CTSB	PC3	0.000411961	0.033012	0.235807	0.235807	0.460131	-0.0636	0.65485	1.1135	0.3263	0.3263	0.3465	BRD-K61443650	thiomersal
CTSB	HT29	0.000412906	0.080118	0.008464	0.008464	0.142001	-0.19715	0.53895	1.1658	1.1499	1.1499	0.3621	BRD-K15502390	nevirapine
CTSB	HCC515	0.000415266	0.240945	0.0744237	0.0744237	0.21154	-0.4432	0.4524	0.7602	0.0234	0.0234	0.196	BRD-K57169635	dacomitinib
CTSB	PC3	0.000418019	0.691145	0.0129601	0.0129601	0.0500516	-0.0636	0.70615	0.5222	0.8088	0.8088	0.9181	BRD-A18620900	estriol
CTSB	A375	0.000419579	0.2404	0.125906	0.125906	0.0320212	-0.1133	0.41825	0.4107	0.2126	0.2126	0.6745	BRD-K20738689	dazmegrel
CTSB	HT29	0.000420501	0.0501135	0.230142	0.230142	0.0222502	-0.19715	0.51935	2.224	-0.0646	-0.0646	1.4344	BRD-K42948882	AMD-11070
CTSB	PC3	0.000420769	0.00798579	0.0542695	0.0542695	0.0383379	-0.0636	0.473	1.3926	0.3122	0.3122	0.8649	BRD-K79090631	CGP-60474
CTSB	A375	0.000421934	0.162007	0.0426586	0.0972947	0.120811	-0.1133	0.6083	0.266	0.4178	0.2179	0.266	BRD-K13566078	BMS-345541
CTSB	MCF7	0.000424108	0.802674	0.654645	0.654645	0.0579257	-0.2102	0.41985	-0.1144	-0.1144	-0.1144	0.4801	BRD-K56291712	voxtalisib
CTSB	HT29	0.000424578	0.0700996	0.00700975	0.00700975	0.177873	-0.19715	0.5358	0.5358	0.65205	0.65205	0.2451	BRD-A26384407	chlorthalidone
CTSB	A549	0.000425529	0.0155987	0.0620434	0.0620434	0.0181959	0	-0.7026	-1.0618	-0.3945	-0.3945	-0.8425	BRD-K07667918	linsitinib
CTSB	PC3	0.000428411	0.215019	0.151033	0.151033	0.314657	-0.0636	0.9554	0.6509	0.6509	0.6509	1.2569	BRD-K62196610	AVN-944
CTSB	A375	0.000431155	0.626401	0.0147843	0.0147843	0.272614	-0.1133	0.4681	0.09715	0.6414	0.6414	0.5322	BRD-K64990520	apocynin
CTSB	MCF7	0.000432111	0.0444866	0.0191048	0.0191048	0.0323683	-0.2102	0.47765	1.449	0.254	0.254	0.4647	BRD-K00521308	ATN-161
CTSB	HA1E	0.00043343	0.17143	0.00547247	0.00547247	0.29886	-0.0725	0.6745	0.5855	0.5855	0.5855	0.914	BRD-K81418486	vorinostat
CTSB	HT29	0.000436744	0.277711	0.00823264	0.00823264	0.0698706	-0.19715	0.47215	0.3392	0.3572	0.3572	0.5447	BRD-K34888156	theobromine
CTSB	A549	0.000438662	0.524105	0.804531	0.804531	0.00211225	0	0.591	0.21265	0	0	1.0591	BRD-U70626184	BI-2536
CTSB	HT29	0.000438732	0.0236146	0.18801	0.18801	0.0114017	-0.19715	0.60725	1.355	0.2508	0.2508	1.6051	BRD-K48488978	YM-201636
CTSB	PC3	0.00044039	0.250792	0.006638	0.006638	0.159339	-0.0636	-0.7454	-2.088	-0.793	-0.793	-0.6398	BRD-K23228615	GDC-0980
CTSB	A375	0.000449597	0.131892	0.00933288	0.00933288	0.093984	-0.1133	-0.6745	-0.9106	-0.5926	-0.5926	-0.6745	BRD-K15592317	CP-466722
CTSB	HA1E	0.000452103	0.0271635	0.00361393	0.00361393	0.120857	-0.0725	0.54565	0.899	0.899	0.899	0.3681	BRD-K83508485	FK-888
CTSB	HEPG2	0.000464337	0.00689947	0.0337285	0.0337285	0.326495	-0.2475	0.44065	0.7484	0.1666	0.1666	0.4675	BRD-K72703948	ZM-447439
CTSB	A375	0.000467888	0.338109	0.0969863	0.0969863	0.308595	-0.1133	0.3848	0.3735	0.25835	0.25835	0.3735	BRD-K23677682	voreloxin
CTSB	A375	0.000467894	0.0217305	0.021712	0.021712	0.000128243	-0.1133	0.4885	0.52185	0.34915	0.34915	1.3879	BRD-K13390322	AT-7519
CTSB	A375	0.00047164	0.152927	0.0548244	0.0548244	0.0363324	-0.1133	0.5673	0.1516	0.1516	0.1516	0.917	BRD-K19456237	piracetam
CTSB	A375	0.000474755	0.258366	0.0813415	0.0813415	0.109538	-0.1133	0.3947	0.57745	0.12175	0.12175	0.3947	BRD-K07753030	acecainide
CTSB	HEPG2	0.000481498	0.191392	0.125133	0.125133	0.13571	-0.2475	0.67045	0.6664	0.479	0.479	0.8667	BRD-K30632436	CTB
CTSB	A375	0.000484846	0.701962	0.263914	0.263914	0.328076	-0.1133	0.3361	-0.2317	0	0	0.1677	BRD-K98004573	rupatadine
CTSB	HA1E	0.000488432	0.0479445	0.023123	0.023123	0.251523	-0.0725	0.5975	0.6898	0.6898	0.6898	0.0604	BRD-A37780065	triamcinolone
CTSB	HA1E	0.000488711	0.0256935	0.150235	0.150235	0.0388331	-0.0725	1.0514	1.6494	0.264	0.264	1.8364	BRD-K48812570	macitentan
CTSB	A375	0.000493236	0.285451	0.0686325	0.0686325	0.139337	-0.1133	-0.90005	-0.3806	-0.8723	-0.8723	-1.0588	BRD-K90868879	canagliflozin
CTSB	MCF7	0.000498791	0.433073	0.233813	0.233813	0.0659852	-0.2102	0.6937	-0.3987	0.1886	0.1886	0.3097	BRD-K36280065	tofacitinib
CTSB	A375	0.000502863	1	0.143021	0.143021	0.215651	-0.1133	0.7021	-0.5113	0.2373	0.2373	0.1253	BRD-K12423485	griseofulvin
CTSB	PC3	0.00050435	0.0138638	0.000913053	0.000913053	0.0278138	-0.0636	0.59925	1.3919	0.9249	0.9249	1.2763	BRD-K26341917	L-ergothioneine
CTSB	MCF7	0.000505875	0.0614075	0.0619332	0.0619332	0.300583	-0.2102	-1.0411	-1.3322	-1.0164	-1.0164	-0.4281	BRD-K22031190	diflunisal
CTSB	HEPG2	0.000507333	0.570569	0.122129	0.122129	0.123476	-0.2475	0.4205	-0.2038	-0.2038	-0.2038	0.4647	BRD-K73319509	PF-04217903
CTSB	MCF7	0.000508485	0.00466831	0.272591	0.272591	0.227908	-0.2102	0.5912	0.98975	0.0304	0.0304	0.6931	BRD-K20696416	NVP-AEW541
CTSB	PC3	0.000509345	0.00798561	0.00514156	0.00514156	0.33629	-0.0636	0.48935	1.1041	0.6045	0.6045	0.5227	BRD-K67121414	apixaban
CTSB	HA1E	0.00051468	0.157831	0.0229828	0.0229828	0.215098	-0.0725	-0.6051	-0.5224	-0.77975	-0.77975	-0.6051	BRD-K79239947	PF-573228
CTSB	HCC515	0.000522424	0.386615	0.244331	0.244331	0.0396306	-0.4432	0.2756	0.0689	0.0689	0.0689	0.2489	BRD-K64800655	PHA-793887
CTSB	HA1E	0.000525451	0.565091	0.294331	0.294331	0.380502	-0.0725	0.8519	-0.1574	0.0257	0.0257	-0.0265	BRD-K62627508	idasanutlin
CTSB	MCF7	0.000534554	0.678853	0.170751	0.170751	0.000144017	-0.2102	0.32805	0.1043	-0.552	-0.552	0.90535	BRD-K78431006	crizotinib
CTSB	A375	0.000536412	0.00681686	0.0106625	0.0106625	0.0147834	-0.1133	-0.6963	-1.6416	-0.5926	-0.5926	-1.6316	BRD-A87137733	GSK-690693
CTSB	PC3	0.000537857	0.52303	0.0249617	0.0249617	0.725345	-0.0636	-0.8323	-0.5778	-0.7394	-0.7394	-0.5204	BRD-K12735121	TG-100801
CTSB	PC3	0.000539076	0.0902357	0.369642	0.369642	0.021119	-0.0636	-0.92845	-0.8625	-0.4893	-0.4893	-1.8237	BRD-K69726342	atorvastatin
CTSB	HA1E	0.000539779	0.107131	0.0554856	0.0554856	0.00289335	-0.0725	0.8433	0.564	0.564	0.564	5.6662	BRD-A77216878	manumycin-a
CTSB	MCF7	0.000540896	0.085124	0.00731639	0.00731639	0.189322	-0.2102	0.3615	0.7452	0.4866	0.4866	0.1074	BRD-K26341917	L-ergothioneine
CTSB	PC3	0.000541697	0.0177496	0.0764884	0.0764884	0.00404874	-0.0636	0.56735	0.9553	0.4693	0.4693	0.90895	BRD-K83963101	MLN-8054
CTSB	HA1E	0.00054949	0.579149	0.081015	0.081015	0.133104	-0.0725	0.742	0.2234	0.4074	0.4074	0.938	BRD-K50422030	clomethiazole
CTSB	MCF7	0.000549988	0.174754	0.0905151	0.0905151	0.0126182	-0.2102	0.5411	0.51425	0.1646	0.1646	0.8398	BRD-K59632282	quinidine
CTSB	PC3	0.000553592	0.084863	0.419021	0.419021	0.0403666	-0.0636	0.6293	0.6335	0.229	0.229	0.6293	BRD-K09426783	TAS-103
CTSB	MCF7	0.00055775	0.169844	0.733121	0.733121	0.501633	-0.2102	0.1004	0.1004	-0.10165	-0.10165	-0.03545	BRD-K99545815	PF-562271
CTSB	HT29	0.000558287	0.0115958	0.0162306	0.0162306	0.0836759	-0.19715	0.7216	1.207	1.207	1.207	0.4549	BRD-A15909516	rebamipide
CTSB	HT29	0.000559536	0.919324	0.215024	0.215024	0.0343776	-0.19715	0.8325	-0.31	0.1925	0.1925	1.0565	BRD-A96754982	tacrolimus
CTSB	A375	0.000561988	0.695433	0.705467	0.705467	0.0546441	-0.1133	0.57805	0.0693	0.0693	0.0693	0.6745	BRD-A51820102	econazole
CTSB	A375	0.00056365	0.0508713	0.00536815	0.00536815	0.152506	-0.1133	-0.88085	-1.1374	-0.97	-0.97	-1.4146	BRD-A69636825	diltiazem
CTSB	MCF7	0.000563822	0.267167	0.0404795	0.0404795	0.0572139	-0.2102	0.36645	0.2374	0.2831	0.2831	0.5489	BRD-K60038276	irbesartan
CTSB	A375	0.000566976	0.915324	0.0168735	0.0168735	0.211144	-0.1133	0.4258	0.3842	0.4674	0.4674	0.3431	BRD-A07704283	isofloxythepin
CTSB	PC3	0.000570418	0.00598449	0.0556026	0.0556026	0.323639	-0.0636	-0.94435	-2.4266	-1.04	-1.04	-0.5819	BRD-K45168550	SB-756050
CTSB	A549	0.0005717	0.146223	0.691059	0.691059	0.490019	0	0.66425	0.406	0	0	0	BRD-K99616396	motesanib
CTSB	HT29	0.000579868	0.0212307	0.0564911	0.0564911	0.227235	-0.19715	0.8806	0.9387	0.7669	0.7669	0.1186	BRD-K15409150	penfluridol
CTSB	HA1E	0.000583047	0.0454465	0.141355	0.141355	0.013549	-0.0725	-0.8608	-1.0277	-0.6068	-0.6068	-1.5342	BRD-K65428967	cordycepin
CTSB	HCC515	0.00058305	0.598861	0.167641	0.167641	0.0213679	-0.4432	0.33905	-0.4427	-0.11975	-0.11975	0.444	BRD-K86797399	SB-939
CTSB	HEPG2	0.000585779	0.25325	0.0800001	0.0800001	0.0040569	-0.2475	0.25685	0.2513	0.1654	0.1654	1.1972	BRD-K22096725	ALW-II-49-7
CTSB	A375	0.000587398	0.0169784	0.0360606	0.0360606	0.147649	-0.1133	0.61175	1.0299	0.5388	0.5388	0.6426	BRD-K93788137	PF-431396
CTSB	PC3	0.000588758	0.0867216	0.0695029	0.0695029	0.151978	-0.0636	0.4235	0.3754	0.31775	0.31775	0.39735	BRD-K05804044	AZ-628
CTSB	HT29	0.000589941	0.186452	0.00625409	0.00625409	0.154219	-0.19715	0.50805	0.4091	0.50805	0.50805	0.72665	BRD-K45033733	famciclovir
CTSB	MCF7	0.000591646	0.763523	0.867808	0.867808	0.0041564	-0.2102	0.86295	-0.1991	-0.1991	-0.1991	1.5528	BRD-K83972459	JWE-035
CTSB	HT29	0.000593996	0.0794383	0.00673072	0.00673072	0.126595	-0.19715	-0.8249	-0.8659	-0.8659	-0.8659	-0.7348	BRD-K94176593	TWS-119
CTSB	PC3	0.000595719	0.00414157	0.719184	0.090615	0.00348857	-0.0636	-0.7299	-1.458	0.2232	-0.7299	-1.45	BRD-K81418486	vorinostat
CTSB	MCF7	0.000598082	0.660455	0.73912	0.73912	0.00397076	-0.2102	1.2917	-0.45145	-0.25265	-0.25265	1.5328	BRD-K72827473	CEP-37440
CTSB	HA1E	0.00059826	0.111561	0.582954	0.582954	0.000827506	-0.0725	0.48905	0.4279	-0.2479	-0.2479	1.1156	BRD-K40175214	torin-1
CTSB	MCF7	0.000603939	0.031432	0.00294476	0.00294476	0.160946	-0.2102	0.4634	0.5073	0.5061	0.5061	0.4703	BRD-A58564983	selamectin
CTSB	HCC515	0.000607325	0.00381323	0.706457	0.706457	0.00297871	-0.4432	1.7288	1.4255	-0.9163	-0.9163	1.7288	BRD-K12343256	trametinib
CTSB	HA1E	0.000608604	0.00704812	6.60911e-06	6.60911e-06	0.209746	-0.0725	-0.76125	-1.1862	-1.2645	-1.2645	-0.82535	BRD-K28392481	AZD-4547
CTSB	A375	0.00061028	0.0238958	0.00659083	0.00659083	0.427618	-0.1133	-0.77655	-1.5176	-0.4789	-0.4789	-0.7096	BRD-K63178091	telotristat
CTSB	PC3	0.000611287	0.0236077	0.0834517	0.0834517	0.00638271	-0.0636	-0.8556	-1.25895	-0.4561	-0.4561	-1.3755	BRD-K53972329	ruxolitinib
CTSB	A375	0.00061185	0.483815	0.0524706	0.0524706	0.873863	-0.1133	0.7896	0	0.3409	0.3409	-0.3019	BRD-K98453471	salirasib
CTSB	A375	0.000614176	0.351368	0.0298705	0.0298705	0.0134014	-0.1133	-0.9281	-0.628	-0.69375	-0.69375	-1.2053	BRD-K86118762	linsitinib
CTSB	HCC515	0.000617419	0.746472	0.0772717	0.0772717	0.337597	-0.4432	0.0697	-0.0749	0.0388	0.0388	-0.2022	BRD-K29395450	PIK-93
CTSB	HA1E	0.000618086	0.389657	0.133986	0.133986	0.148214	-0.0725	0.6745	-0.7752	0.5254	0.5254	0.5655	BRD-U07805514	saracatinib
CTSB	HA1E	0.000619875	0.0298368	0.00631951	0.00631951	0.0812276	-0.0725	0.43335	0.8285	0.6087	0.6087	0.5474	BRD-K43797669	genistein
CTSB	MCF7	0.000621582	0.211835	0.0211235	0.0211235	0.217669	-0.2102	0.5415	0.1892	0.5824	0.5824	0.4105	BRD-K30550578	PF-04620110
CTSB	HT29	0.000624455	0.222142	0.0281702	0.0281702	0.525183	-0.19715	0.4976	0.2982	0.2982	0.2982	0	BRD-K25412176	GSK-2110183
CTSB	HA1E	0.000629068	0.0752331	0.227795	0.227795	0.0404889	-0.0725	0.4955	0.6533	0.158	0.158	0.7513	BRD-K52172416	anastrozole
CTSB	A375	0.000631673	0.0176225	0.00254246	0.00254246	0.445817	-0.1133	0.57025	0.9834	0.6408	0.6408	-0.0088	BRD-K58435339	AT-13387
CTSB	HA1E	0.000631692	0.0557384	0.0988062	0.0988062	0.28079	-0.0725	-0.4768	-0.4704	-0.4003	-0.4003	-0.1794	BRD-K02708799	GSK-1059615
CTSB	A375	0.000637235	0.0158369	0.000877019	0.000877019	0.995309	-0.1133	-0.74295	-1.3464	-1.0077	-1.0077	0.2253	BRD-A63310107	miglitol
CTSB	HT29	0.000639383	0.0198301	0.0518989	0.0518989	0.615336	-0.19715	0.70775	1.1812	0.6662	0.6662	0.5616	BRD-K83972459	JWE-035
CTSB	HT29	0.0006408	0.075865	0.203657	0.203657	0.0111473	-0.19715	0.75135	0.6565	0.2236	0.2236	1.8701	BRD-K23228615	GDC-0980
CTSB	A375	0.000654444	0.52704	0.612277	0.612277	0.487801	-0.1133	0.4268	-0.04705	-0.2179	-0.2179	0.0164	BRD-K99749624	linifanib
CTSB	HT29	0.000655125	0.51206	0.12113	0.12113	0.396259	-0.19715	0.90055	0.0943	0.7232	0.7232	0.1558	BRD-K44974079	ticagrelor
CTSB	HT29	0.000662399	0.199283	0.493153	0.493153	0.145112	-0.19715	0.9934	0.7881	-0.166	-0.166	0.7805	BRD-K63750851	mycophenolic-acid
CTSB	A375	0.000666289	0.0310911	0.0304398	0.0304398	0.0334611	-0.1133	-0.7271	-0.9201	-0.8403	-0.8403	-1.1815	BRD-K01292756	pimozide
CTSB	HT29	0.000666799	0.488815	0.0265369	0.0265369	0.0170845	-0.19715	0.7496	-0.4998	0.5217	0.5217	1.647	BRD-A49765801	fludroxycortide
CTSB	MCF7	0.000668913	0.963304	0.0444511	0.0444511	0.0171113	-0.2102	-1.79855	-0.2391	-1.4997	-1.4997	-2.1216	BRD-K67068943	ORE-1001
CTSB	PC3	0.000676928	0.587316	0.67487	0.67487	0.010237	-0.0636	0.84005	0.6178	0.0701	0.0701	2.3366	BRD-K17944737	artesunate
CTSB	HA1E	0.000678944	0.0876954	0.00817487	0.00817487	0.0548846	-0.0725	-0.8944	-0.8703	-0.8703	-0.8703	-0.7929	BRD-K49685476	TTNPB
CTSB	PC3	0.000681533	0.0979904	0.188838	0.188838	0.0752212	-0.0636	0.7537	0.3777	0.3257	0.3257	0.7537	BRD-K42918627	GSK-2126458
CTSB	MCF7	0.000682301	0.232447	0.0384146	0.0384146	0.0309025	-0.2102	0.4073	0.29965	0.3504	0.3504	0.5864	BRD-K10961822	latanoprost
CTSB	A549	0.000684795	0.00400502	0.00010307	0.00010307	0.210737	0	-0.6443	-1.9036	-1.667	-1.667	-0.2563	BRD-K19687926	lapatinib
CTSB	HT29	0.000688201	0.868151	0.860274	0.860274	0.0193132	-0.19715	1.1135	-0.4732	-0.3427	-0.3427	1.2325	BRD-K30331124	ASC-J9
CTSB	MCF7	0.000693118	0.836333	0.857586	0.857586	0.0255356	-0.2102	0.78535	0.0884	0.0884	0.0884	0.8111	BRD-K93034159	cladribine
CTSB	HA1E	0.000694314	0.166262	0.0118635	0.0118635	0.323201	-0.0725	0.5334	0.48775	0.3479	0.3479	0.22865	BRD-K79254416	decitabine
CTSB	HCC515	0.000694913	0.541218	0.1448	0.1448	0.0174005	-0.4432	0.9343	-0.3464	0.00975	0.00975	1.6397	BRD-K92428232	GSK-461364
CTSB	MCF7	0.000697451	0.0398607	0.81804	0.81804	0.00720459	-0.2102	0.74635	0.4015	-0.1718	-0.1718	0.85085	BRD-K17743125	belinostat
CTSB	MCF7	0.000699647	0.0988546	0.0279604	0.0279604	0.202416	-0.2102	0.5354	0.7303	0.4898	0.4898	0.4463	BRD-K62965247	tipifarnib-P2
CTSB	A375	0.000704195	0.159363	0.338128	0.338128	0.264349	-0.1133	0.3251	0.2444	0.0605	0.0605	0.1717	BRD-K70463136	BAY-87-2243
CTSB	HA1E	0.000704807	0.198812	0.0202538	0.0202538	0.0221433	-0.0725	1.0761	1.6686	1.1974	1.1974	2.2712	BRD-K50398167	meclofenamic-acid
CTSB	HA1E	0.000708331	0.0172929	0.0156272	0.0156272	0.53391	-0.0725	0.6511	0.9736	0.6618	0.6618	0	BRD-K03816923	rottlerin
CTSB	MCF7	0.00071002	0.165438	0.0329391	0.0329391	0.08041	-0.2102	0.41705	0.7137	0.3226	0.3226	0.7487	BRD-A26423207	sparfloxacin
CTSB	MCF7	0.000715494	0.0183586	0.00918352	0.00918352	0.181195	-0.2102	0.41795	0.66945	0.39115	0.39115	0.38005	BRD-K09951645	dabrafenib
CTSB	MCF7	0.000719096	0.705774	0.12842	0.12842	0.0995016	-0.2102	0.9362	-0.5172	0.4293	0.4293	1.267	BRD-K02950022	BMS-299897
CTSB	HCC515	0.000721985	0.0244891	0.00580888	0.00580888	0.24537	-0.4432	0.0087	0.3808	0.3808	0.3808	-0.2333	BRD-K19477839	SGX523
CTSB	MCF7	0.000738061	0.034351	0.00570501	0.00570501	0.155888	-0.2102	0.3408	0.6469	0.6469	0.6469	0.1033	BRD-K82522873	N6022
CTSB	HA1E	0.000738362	0.628555	0.0895805	0.0895805	0.00527292	-0.0725	0.9624	0.1417	0.8205	0.8205	2.0711	BRD-A33280134	etoposide
CTSB	HT29	0.000738844	0.187277	0.581337	0.581337	0.132593	-0.19715	0.81135	0.2911	-0.1679	-0.1679	1.0025	BRD-A28467416	PKI-179
CTSB	A375	0.000739235	0.637075	0.916464	0.916464	0.0103603	-0.1133	0.8526	-0.36575	-0.1275	-0.1275	1.2303	BRD-K13050541	acivicin
CTSB	MCF7	0.000739539	0.0174925	0.104404	0.104404	0.147643	-0.2102	0.5602	0.6745	0.5567	0.5567	0.301	BRD-A07704283	isofloxythepin
CTSB	A375	0.000742994	0.0414211	0.099071	0.099071	0.0603022	-0.1133	-0.67895	-0.7634	-0.3243	-0.3243	-0.7186	BRD-K71480163	GDC-0068
CTSB	HA1E	0.000747242	0.0463027	0.00132382	0.00132382	0.0237391	-0.0725	-0.8962	-1.0912	-1.061	-1.061	-1.4695	BRD-K01436366	XMD-1150
CTSB	HT29	0.00074916	0.0915544	0.0869798	0.0869798	0.14648	-0.19715	0.49335	0.7246	0.1335	0.1335	0.0986	BRD-K60585088	paricalcitol
CTSB	MCF7	0.000753969	0.00743744	0.190119	0.190119	0.314914	-0.2102	0.89	0.8997	0.6246	0.6246	2.0086	BRD-K93754473	tamoxifen
CTSB	A375	0.000758758	0.117126	0.00207125	0.00207125	0.0602353	-0.1133	-0.7207	-0.7878	-0.8499	-0.8499	-0.6536	BRD-K91456750	sacubitril
CTSB	A375	0.000759869	0.0580611	0.00147944	0.00147944	0.834276	-0.1133	0.458	0.6002	0.6002	0.6002	0.0307	BRD-K29133151	ICI-185,282
CTSB	HA1E	0.000760136	0.119566	0.00717231	0.00717231	0.438862	-0.0725	0.84285	0.8034	0.8275	0.8275	-0.8366	BRD-A65280694	molindone
CTSB	HT29	0.000760335	0.0983303	0.0276984	0.0276984	0.0580935	-0.19715	-0.5627	-0.65895	-0.51675	-0.51675	-0.9095	BRD-K41895714	AS-605240
CTSB	HA1E	0.000761793	0.78135	0.446708	0.446708	0.284671	-0.0725	0.71145	0.1985	0.1985	0.1985	0.3067	BRD-K44408410	2-methoxyestradiol
CTSB	MCF7	0.000764242	0.114192	0.0344953	0.0344953	0.017976	-0.2102	0.01435	0.3132	-0.00215	-0.00215	0.0428	BRD-K49865102	PD-0325901
CTSB	HA1E	0.000764562	0.396474	0.0177956	0.0177956	0.502995	-0.0725	-0.8688	-0.6289	-0.9348	-0.9348	-0.7416	BRD-K24771047	ampalex
CTSB	MCF7	0.000764579	0.943185	0.117561	0.117561	0.86994	-0.2102	0.5691	-0.275	0	0	0.0697	BRD-K77947974	fluspirilene
CTSB	A375	0.000765379	0.0836099	0.107375	0.107375	0.90833	-0.1133	0.3804	0.3804	0.3379	0.3379	-0.2604	BRD-K80043866	sodium-gualenate
CTSB	HT29	0.000766839	0.339557	0.149034	0.149034	0.233572	-0.19715	0.5635	-0.0228	0.0083	0.0083	0.5159	BRD-A45498368	WYE-125132
CTSB	PC3	0.000785946	0.0124983	0.00152608	0.00152608	0.153785	-0.0636	-1.1791	-1.5475	-1.4899	-1.4899	-1.5022	BRD-A12077521	cefepime
CTSB	A375	0.000791206	0.680287	0.00151	0.00151	0.507368	-0.1133	0.4879	0.2003	0.7325	0.7325	0.106	BRD-K50031829	PF-04447943
CTSB	MCF7	0.000794613	0.845151	0.771237	0.771237	0.00510731	-0.2102	0.8291	-0.481	-0.481	-0.481	1.4131	BRD-K89015388	GSK-923295
CTSB	A375	0.000797473	0.393359	0.0409546	0.0409546	0.0759471	-0.1133	0.4979	0.3344	0.3344	0.3344	0.5116	BRD-A24514565	warfarin
CTSB	HEPG2	0.000799106	0.197866	0.123999	0.123999	0.0199123	-0.2475	0.36355	-0.0688	0.1115	0.1115	1.8556	BRD-K12787259	CX-5461
CTSB	HCC515	0.000803794	0.0120853	0.000430039	0.000430039	0.194061	-0.4432	0.30955	1.2588	1.139	1.139	0.0632	BRD-K70511574	HMN-214
CTSB	MCF7	0.000806642	0.088674	0.520851	0.520851	0.0710518	-0.2102	0.4635	0.60715	0.2864	0.2864	0.7582	BRD-K68346641	amsacrine
CTSB	HA1E	0.000806721	0.415425	0.0855253	0.0855253	0.526138	-0.0725	-0.5354	-0.42225	-0.4012	-0.4012	-0.16065	BRD-K03449891	foretinib
CTSB	PC3	0.000807599	0.0992136	0.0100983	0.0100983	0.317068	-0.0636	0.7214	0.7631	0.4157	0.4157	0.8145	BRD-K37590257	GSK-256066
CTSB	MCF7	0.000808965	0.0669874	0.00542058	0.00542058	0.0352433	-0.2102	-0.9136	-0.922	-0.922	-0.922	-1.2021	BRD-A02710418	meptazinol
CTSB	A375	0.000817826	0.0157096	0.047687	0.047687	0.202856	-0.1133	0.3381	1.0976	0.1685	0.1685	0.4062	BRD-K32164935	tolazamide
CTSB	HA1E	0.000821349	0.0332183	0.0116813	0.0116813	0.414249	-0.0725	0.7284	1.2816	0.8734	0.8734	0.2456	BRD-K42436189	AZ-20
CTSB	HCC515	0.000826345	0.302935	0.0629827	0.0629827	0.0115343	-0.4432	0.18535	0.4934	0.0898	0.0898	0.8831	BRD-K33379087	tivantinib
CTSB	A375	0.000826918	0.0171454	0.309665	0.309665	0.00530382	-0.1133	-0.8728	-2.9018	-0.5509	-0.5509	-1.6847	BRD-K00152668	adarotene
CTSB	HA1E	0.000830886	0.676801	0.0209049	0.0209049	0.188357	-0.0725	0.7463	0.0451	0.728	0.728	1.2433	BRD-K45152786	merbarone
CTSB	HT29	0.000838338	0.058386	0.00275474	0.00275474	0.220329	-0.19715	-1.0314	-1.0314	-1.0722	-1.0722	-0.84185	BRD-K80043866	sodium-gualenate
CTSB	HEPG2	0.000840459	0.316003	0.216306	0.216306	0.434055	-0.2475	0.3599	-0.0389	-0.0389	-0.0389	0.2534	BRD-A50737080	CGK-733
CTSB	A375	0.00084166	0.0143288	0.00237248	0.00237248	0.235335	-0.1133	-0.9986	-1.2418	-1.0464	-1.0464	-0.7159	BRD-K33127281	adapalene
CTSB	HT29	0.000847122	0.973987	0.0797746	0.0797746	0.0433565	-0.19715	1.023	-0.4964	1.023	1.023	1.2572	BRD-K18961567	LY-2801653
CTSB	HA1E	0.000848433	0.275036	0.102998	0.102998	0.059984	-0.0725	0.7242	0.8388	0.5276	0.5276	0.9175	BRD-K04264130	favipiravir
CTSB	A375	0.000853831	0.902895	0.910934	0.910934	0.0333797	-0.1133	0.4589	-0.117	-0.117	-0.117	0.6745	BRD-K36927236	glibenclamide
CTSB	HT29	0.000854371	0.17206	0.141867	0.141867	0.796099	-0.19715	1.0094	0.2416	0.2416	0.2416	-0.1079	BRD-K44844162	taselisib
CTSB	A375	0.000855057	0.502673	0.0682041	0.0682041	0.181974	-0.1133	0.432	0.1237	0.3261	0.3261	0.4165	BRD-K51263939	sarcosine
CTSB	A375	0.000855639	0.041666	0.00283659	0.00283659	0.0286519	-0.1133	-0.6181	-0.7008	-0.7008	-0.7008	-1.3942	BRD-A14966924	alaproclate
CTSB	A375	0.000858738	0.114966	0.0179537	0.0179537	0.0380265	-0.1133	0.6357	0.7222	0.546	0.546	0.6745	BRD-K24616672	procaine
CTSB	HA1E	0.000858912	0.137611	0.946881	0.946881	0.00299725	-0.0725	1.39255	-0.8026	-0.3839	-0.3839	3.3809	BRD-K40718343	AEE-788
CTSB	A375	0.000860603	0.90406	0.52913	0.52913	0.0224705	-0.1133	0.3714	0.0486	0.06665	0.06665	1.092	BRD-K56334280	amonafide
CTSB	MCF7	0.000863669	0.0389271	0.0154676	0.0154676	0.0612201	-0.2102	-0.88165	-1.5279	-1.0152	-1.0152	-1.5681	BRD-A82522119	tibolone
CTSB	PC3	0.00087083	0.469287	0.00674266	0.00674266	0.04804	-0.0636	0.6235	-0.094	1.8053	1.8053	0.71	BRD-K78485176	olmesartan-medoxomil
CTSB	HEPG2	0.000872183	0.496429	0.0377222	0.0377222	0.427764	-0.2475	-1.2491	-0.7911	-1.2587	-1.2587	-1.2395	BRD-K12343256	trametinib
CTSB	MCF7	0.000875705	0.224995	0.00635958	0.00635958	0.0855335	-0.2102	-0.8101	-0.8406	-0.9056	-0.9056	-0.7796	BRD-K43164539	cholic-acid
CTSB	HT29	0.000877498	0.13802	0.230032	0.230032	0.0565055	-0.19715	-0.9588	-0.6029	-0.533	-0.533	-1.253	BRD-K09186807	KIN001-244
CTSB	A375	0.000880775	0.0398788	0.29302	0.0366519	0.0243651	-0.1133	0.4135	0.6426	0.2809	0.4135	0.6157	BRD-K12184916	NVP-BEZ235
CTSB	A375	0.000882664	0.203255	0.312464	0.312464	0.259629	-0.1133	0.3672	-0.53985	0.0656	0.0656	0.3154	BRD-K28392481	AZD-4547
CTSB	HT29	0.000888318	0.1967	0.103203	0.103203	0.0318927	-0.19715	0.5157	0.6516	0.2916	0.2916	0.8832	BRD-K82484347	GSK-J2
CTSB	HT29	0.000888318	0.025051	0.0018995	0.0018995	0.183994	-0.19715	0.64665	1.3419	1.0115	1.0115	0.5217	BRD-K50498985	taladegib
CTSB	HCC515	0.00089622	0.217606	0.00293612	0.00293612	0.310158	-0.4432	-0.0322	-0.15135	0.1969	0.1969	-0.1067	BRD-K87142802	veliparib
CTSB	A375	0.000899601	0.154624	0.177941	0.177941	0.239811	-0.1133	0.49955	0.2805	0.3206	0.3206	0.4828	BRD-K03384561	roquinimex
CTSB	HT29	0.000899909	0.169745	0.107614	0.107614	0.156628	-0.19715	0.4722	0.2269	0.2269	0.2269	1.177	BRD-K42981054	mibampator
CTSB	A549	0.000906594	0.00359869	0.000364613	0.000364613	0.00319348	0	-1.81465	-2.2861	-1.7079	-1.7079	-3.8532	BRD-K88573743	A-443654
CTSB	HA1E	0.000911613	0.435378	0.195858	0.195858	0.641536	-0.0725	0.65145	-0.5688	0.3923	0.3923	0.1321	BRD-A64553394	DPI-201106
CTSB	PC3	0.000921066	0.622186	0.0464743	0.0464743	0.740769	-0.0636	0.9314	-0.5839	0.8156	0.8156	-0.2736	BRD-K77987382	mebendazole
CTSB	A549	0.000921871	0.0712491	0.0416323	0.0416323	0.219906	0	0.4251	0.46875	0.33755	0.33755	0.1599	BRD-K09132007	D-4476
CTSB	MCF7	0.000925708	0.0462354	0.00196916	0.00196916	0.909501	-0.2102	-1.0035	-1.5144	-1.2154	-1.2154	-0.3423	BRD-K34185671	AMG-517
CTSB	A375	0.000942257	0.939072	0.15784	0.15784	0.736407	-0.1133	0.45475	0.2537	0.2537	0.2537	0.2084	BRD-K67901620	avasimibe
CTSB	HA1E	0.000945489	0.180866	0.00174524	0.00174524	0.358972	-0.0725	0.9507	0.9368	0.9646	0.9646	1.356	BRD-K67277431	picotamide
CTSB	MCF7	0.000949383	0.0885295	0.37349	0.37349	0.503257	-0.2102	0.3522	0.241	-0.0631	-0.0631	-0.169	BRD-K56334280	amonafide
CTSB	PC3	0.000953727	0.763529	0.0460641	0.0460641	0.440935	-0.0636	0.8228	0.3869	0.721	0.721	0.5284	BRD-K24219278	amineptine
CTSB	MCF7	0.000955743	0.506053	0.161475	0.161475	0.352907	-0.2102	0.34965	0.4487	0.2753	0.2753	0.2119	BRD-K59369769	tozasertib
CTSB	HT29	0.000973843	0.119162	0.00882563	0.00882563	0.0674657	-0.19715	0.46065	0.567	0.4872	0.4872	0.4341	BRD-A67479912	progesterone
CTSB	HA1E	0.000977728	0.0153432	0.465443	0.465443	0.00298766	-0.0725	-4.3392	-6.1188	-1.1489	-1.1489	-7.3225	BRD-K76703230	YM-155
CTSB	HEPG2	0.000984235	0.00468392	5.40568e-06	5.40568e-06	0.362134	-0.2475	0.7962	1.3042	0.8955	0.8955	0.9184	BRD-U51024685	HG-6-64-01
CTSB	HT29	0.00099354	0.189268	0.0316079	0.0316079	0.0155432	-0.19715	-1.03265	-1.0441	-1.0441	-1.0441	-1.1709	BRD-K50163129	acrivastine
CTSB	A375	0.000993802	0.124879	0.516074	0.516074	0.00441646	-0.1133	0.6581	0.6398	-0.0884	-0.0884	1.8134	BRD-K28822270	resminostat
CTSB	MCF7	0.000996961	0.130316	0.0192571	0.0192571	0.173989	-0.2102	0.3694	0.3093	0.33935	0.33935	0.5005	BRD-K13356952	methazolamide
CTSB	HEPG2	0.00100325	0.178046	0.0723551	0.0723551	0.0982793	-0.2475	0.52035	0.9013	0.5129	0.5129	1.6702	BRD-K16478699	PLX-4720
CTSB	HCC515	0.00100408	0.0962607	0.586948	0.586948	0.0328188	-0.4432	0.272	0.26635	-0.27685	-0.27685	0.3062	BRD-A18328003	GDC-0980
CTSB	HT29	0.0010042	0.010684	0.103686	0.103686	0.412407	-0.19715	1.0237	1.1972	0.4597	0.4597	0.9041	BRD-K50387473	XMD-892
CTSB	A375	0.0010045	0.173773	0.0324668	0.0324668	0.309294	-0.1133	-0.6745	-0.4128	-0.6745	-0.6745	-0.5339	BRD-K11073688	CPI-1189
CTSB	MCF7	0.00100754	0.00254113	0.0198255	0.00100754	0.00425819	-0.2102	0.3947	1.3332	0.262	0.3947	1.9551	BRD-K37846922	3,3'-diindolylmethane
CTSB	PC3	0.00101201	0.232515	0.0753313	0.0753313	0.0742435	-0.0636	0.5394	0.4876	0.3177	0.3177	0.7808	BRD-A12994259	pomalidomide
CTSB	PC3	0.00101327	0.308331	0.401089	0.401089	0.277245	-0.0636	-0.66655	-0.40915	-0.38165	-0.38165	-0.678	BRD-K78431006	crizotinib
CTSB	MCF7	0.00101479	0.181241	0.0133111	0.0133111	0.187202	-0.2102	-0.82465	-0.7799	-0.7799	-0.7799	-1.4066	BRD-K35520305	dacarbazine
CTSB	A375	0.00101586	0.0242641	0.00287882	0.00287882	0.622417	-0.1133	0.6042	1.0287	0.8349	0.8349	0.4561	BRD-K86816506	PF-04457845
CTSB	HA1E	0.00101821	0.930587	0.382983	0.382983	0.038509	-0.0725	-1.1552	0.0562	-0.2345	-0.2345	-1.0865	BRD-K81458380	CX-4945
CTSB	HA1E	0.00102183	0.38077	0.194879	0.194879	0.171893	-0.0725	0.37385	0.2915	0.1926	0.1926	1.2687	BRD-K90195324	bazedoxifene
CTSB	MCF7	0.00104089	0.0478889	0.000252011	0.000252011	0.691749	-0.2102	-0.9361	-0.9461	-1.1226	-1.1226	-0.5727	BRD-K61452026	emtricitabine
CTSB	HT29	0.00104744	0.0101506	0.00423422	0.00423422	0.177714	-0.19715	0.9749	1.7075	1.3448	1.3448	0.9211	BRD-A43882281	pinacidil
CTSB	HA1E	0.00105275	0.30811	0.0168359	0.0168359	0.713157	-0.0725	0.7916	0.5832	0.7181	0.7181	-0.3878	BRD-K43887077	dopamine
CTSB	PC3	0.00105294	0.376664	0.580159	0.580159	0.053355	-0.0636	-1.47195	-1.6147	-0.7741	-0.7741	-1.3292	BRD-A27376179	lestaurtinib
CTSB	HA1E	0.00105447	0.376771	0.0218534	0.0218534	0.386141	-0.0725	-0.6745	-0.4974	-0.6745	-0.6745	-0.2299	BRD-K70914287	BIBX-1382
CTSB	A375	0.0010561	0.506114	0.00691855	0.00691855	0.276056	-0.1133	0.3793	0.0879	0.5176	0.5176	0.3793	BRD-K11433652	aspirin
CTSB	MCF7	0.00105725	0.179334	0.0164572	0.0164572	0.244713	-0.2102	-0.8701	-0.5291	-0.6745	-0.6745	-1.1186	BRD-K77695569	tiabendazole
CTSB	HT29	0.00106013	0.379427	0.0950957	0.0950957	0.435309	-0.19715	0.71945	0.5998	0.5998	0.5998	0.0805	BRD-K38436528	imipramine
CTSB	A375	0.00106284	0.530867	0.0199188	0.0199188	0.0518672	-0.1133	-0.7246	-0.1608	-0.746	-0.746	-0.969	BRD-K74339692	tamsulosin
CTSB	PC3	0.00106382	0.659953	0.855486	0.855486	0.0274903	-0.0636	0.56405	0.1842	0.05975	0.05975	1.0074	BRD-K08799216	pelitinib
CTSB	HT29	0.00106998	0.0585176	0.084796	0.084796	0.0400854	-0.19715	-0.7611	-0.95	-0.8217	-0.8217	-1.112	BRD-K36324071	NF-449
CTSB	A375	0.00107261	0.622763	0.147864	0.147864	0.152224	-0.1133	0.436	-0.0584	-0.0584	-0.0584	0.3381	BRD-K97884852	malotilate
CTSB	PC3	0.00107281	0.026426	0.00310008	0.00310008	0.0414517	-0.0636	0.68205	0.8899	0.8098	0.8098	0.9234	BRD-A97437073	rosiglitazone
CTSB	A375	0.00107793	0.00675676	0.118468	0.118468	0.0118847	-0.1133	-1.11905	-1.6495	-1.0292	-1.0292	-2.3655	BRD-K24576554	AT-9283
CTSB	HT29	0.00107837	0.683561	0.0917574	0.0917574	0.0191098	-0.19715	0.4779	-0.3608	0.3163	0.3163	2.2466	BRD-A67097164	ifosfamide
CTSB	A375	0.00108249	0.480761	0.152183	0.152183	0.479542	-0.1133	0.6425	-0.1528	0.1909	0.1909	0.0931	BRD-K78513633	lonidamine
CTSB	PC3	0.0010946	0.418172	0.00891301	0.00891301	0.389474	-0.0636	0.75915	0.5558	0.8829	0.8829	0.333	BRD-K50000283	PHA-767491
CTSB	A549	0.00109899	0.245785	0.573612	0.573612	0.017262	0	0.6745	0.40335	0.06895	0.06895	0.7406	BRD-A10523515	GSK-429286A
CTSB	HA1E	0.00110083	0.0745099	0.00715405	0.00715405	0.24829	-0.0725	0.7647	0.9963	0.8034	0.8034	0.4962	BRD-A66155091	trilostane
CTSB	HA1E	0.00110298	0.0846331	0.00375569	0.00375569	0.242087	-0.0725	-0.8062	-0.8062	-0.8378	-0.8378	-0.2597	BRD-K07667918	linsitinib
CTSB	A375	0.00110401	0.878112	0.00315867	0.00315867	0.444649	-0.1133	0.5173	0.4303	0.6719	0.6719	0.1833	BRD-K20141153	atomoxetine
CTSB	A375	0.00110948	0.573779	0.464752	0.464752	0.0355097	-0.1133	0.4809	-0.0769	-0.0769	-0.0769	0.9402	BRD-K17555800	talmapimod
CTSB	HT29	0.00111596	0.540772	0.142255	0.142255	0.651722	-0.19715	-0.9095	-0.8703	-0.366	-0.366	-0.0543	BRD-K20285085	fostamatinib
CTSB	HA1E	0.00112112	0.833944	0.253008	0.253008	0.188357	-0.0725	-0.8361	-0.3153	-0.329	-0.329	-0.8005	BRD-K16189898	CHIR-99021
CTSB	PC3	0.00112483	0.165348	0.00865328	0.00865328	0.319977	-0.0636	0.59915	0.6927	0.632	0.632	0.5663	BRD-K48461310	fosfomycin
CTSB	HCC515	0.00113195	0.0143107	0.0248498	0.0248498	0.00368226	-0.4432	0.0875	0.5939	0.0689	0.0689	1.3885	BRD-K49075727	nintedanib
CTSB	A375	0.00113388	0.528301	0.020635	0.020635	0.142643	-0.1133	0.3902	0.0492	0.3305	0.3305	0.3305	BRD-A50033377	rivaroxaban
CTSB	HA1E	0.00113945	0.941154	0.0187028	0.0187028	0.107131	-0.0725	0.7012	0.4297	0.5568	0.5568	0.8275	BRD-K61691541	PF-03084014
CTSB	A375	0.00114188	0.368333	0.115173	0.115173	0.823582	-0.1133	0.5826	0.7177	0.4475	0.4475	0.1386	BRD-K07572174	curcumin
CTSB	HEPG2	0.00114651	0.764171	0.599632	0.599632	0.196	-0.2475	0.6194	-0.1905	-0.01605	-0.01605	0.4367	BRD-K53417444	OTS-167
CTSB	MCF7	0.0011628	0.128266	0.0453957	0.0453957	0.265615	-0.2102	0.17325	0.1402	-0.0153	-0.0153	0.6745	BRD-K05673000	dicloxacillin
CTSB	HT29	0.00116409	0.0498825	0.197942	0.197942	0.0286519	-0.19715	0.65585	0.5238	0.3528	0.3528	0.9783	BRD-K84163249	ercalcitriol
CTSB	HA1E	0.00117529	0.128713	0.0156029	0.0156029	0.140503	-0.0725	0.53665	0.4823	0.4823	0.4823	0.8342	BRD-K67578145	GDC-0879
CTSB	A375	0.0011783	0.282069	0.343699	0.343699	0.313372	-0.1133	0.4316	0.26635	0.2455	0.2455	0.523	BRD-K99964838	bosutinib
CTSB	HA1E	0.00118274	0.79157	0.0443009	0.0443009	0.00836876	-0.0725	0.7833	-0.118	1.0183	1.0183	1.2068	BRD-K49404994	levetiracetam
CTSB	PC3	0.00118317	0.00267146	0.019484	0.019484	0.0643942	-0.0636	0.35345	0.9261	0.4395	0.4395	2.074	BRD-K40175214	torin-1
CTSB	HT29	0.00118443	0.990933	0.357571	0.357571	0.533805	-0.19715	2.2159	-0.1691	-0.1516	-0.1516	0.09955	BRD-K69116396	sertindole
CTSB	MCF7	0.00119546	0.0570372	4.96363e-05	4.96363e-05	0.17948	-0.2102	1.33905	1.7544	1.7293	1.7293	1.5255	BRD-K28456624	seocalcitol
CTSB	HA1E	0.00119695	0.89585	0.389046	0.389046	0.00984552	-0.0725	-0.88225	0	0	0	-2.001	BRD-K75911534	SU-014813
CTSB	PC3	0.00119867	0.00382119	0.0171109	0.0171109	0.549039	-0.0636	0.77605	2.4993	1.4325	1.4325	0.0289	BRD-K73088654	floxuridine
CTSB	HT29	0.0011991	0.753347	0.0437369	0.0437369	0.113758	-0.19715	-0.8515	-0.4224	-0.744	-0.744	-0.8789	BRD-K34713073	PD-123319
CTSB	HT29	0.00120163	0.0491948	0.327739	0.327739	0.013761	-0.19715	0.5728	0.7266	0.3672	0.3672	4.6977	BRD-K14529030	meisoindigo
CTSB	MCF7	0.0012055	0.218006	0.00542927	0.00542927	0.00845612	-0.2102	0.3532	0.2237	0.4827	0.4827	0.9395	BRD-K83186168	AZD-1981
CTSB	A375	0.00121441	0.0973988	0.543638	0.543638	0.0307862	-0.1133	0.3398	0.4044	0.2282	0.2282	1.0232	BRD-K53665955	MK-5108
CTSB	A375	0.00121441	0.435076	0.0887194	0.0887194	0.0317086	-0.1133	-0.74335	-0.0699	-0.3067	-0.3067	-1.9344	BRD-K83720053	avagacestat
CTSB	HCC515	0.00122023	0.587697	0.0411052	0.0411052	0.00060663	-0.4432	0.21575	-0.44655	-0.73295	-0.73295	0.7524	BRD-A39996500	radicicol
CTSB	MCF7	0.00122511	0.418917	0.103078	0.103078	0.253418	-0.2102	0.53545	0.4289	0.4289	0.4289	0.0359	BRD-K53737926	amitriptyline
CTSB	HA1E	0.00122804	0.0357338	0.257811	0.257811	0.0254721	-0.0725	0.40655	0.70355	0.24945	0.24945	1.4398	BRD-K83963101	MLN-8054
CTSB	A375	0.00123233	0.284568	0.0734019	0.0734019	0.639134	-0.1133	0.499	0.2784	0.2784	0.2784	-0.2076	BRD-A87983072	benzotript
CTSB	A375	0.00123771	0.830579	0.0608426	0.0608426	0.628873	-0.1133	0.4556	-0.52795	0.26355	0.26355	-0.02565	BRD-K07691486	roscovitine
CTSB	HCC515	0.00124356	0.00519671	0.00305301	0.00305301	0.109591	-0.4432	0.2773	1.0625	0.819	0.819	0.5525	BRD-K54256913	MK-1775
CTSB	HT29	0.00125137	0.0709101	0.00451864	0.00451864	0.00803254	-0.19715	-0.5475	-0.5008	-0.5715	-0.5715	-0.5959	BRD-K02708799	GSK-1059615
CTSB	HT29	0.00125607	0.0915544	0.114312	0.114312	0.0772617	-0.19715	0.4396	0.6725	0.193	0.193	0.7	BRD-K24219278	amineptine
CTSB	PC3	0.00125987	0.390301	0.00790073	0.00790073	0.0393534	-0.0636	-0.66825	-0.4606	-1.0581	-1.0581	-1.5959	BRD-K13154216	everolimus
CTSB	HT29	0.00126492	0.0322095	0.0387056	0.0387056	0.366177	-0.19715	0.55945	0.8026	0.5527	0.5527	0.5662	BRD-K37355418	efaproxiral
CTSB	A549	0.00127715	0.0518052	0.00975665	0.00975665	0.104024	0	0.3376	0.6823	0.3376	0.3376	0.42615	BRD-K89391146	RG-108
CTSB	PC3	0.00128228	0.135544	0.0103569	0.0103569	0.125276	-0.0636	0.6884	0.95475	0.7771	0.7771	0.6626	BRD-K60623809	SU-11652
CTSB	HCC515	0.00129208	0.729934	0.160699	0.160699	0.917081	-0.4432	0.01715	-0.2697	-0.1445	-0.1445	-0.3335	BRD-K57080016	selumetinib
CTSB	MCF7	0.00131247	0.0397685	0.0512904	0.0512904	0.319231	-0.2102	0.2058	0.32805	0.1409	0.1409	0.0263	BRD-K12502280	TG-101348
CTSB	HT29	0.00131462	0.406795	0.0490151	0.0490151	0.13387	-0.19715	0.48045	0.3095	0.3305	0.3305	0.555	BRD-K47000838	cytochalasin-b
CTSB	HT29	0.00132078	0.212565	0.00516332	0.00516332	0.128943	-0.19715	-0.8866	-0.852	-0.9684	-0.9684	-0.7056	BRD-K21670884	cariporide
CTSB	A375	0.00132292	0.0529995	0.119941	0.119941	0.215833	-0.1133	0.3237	0.7271	0.2598	0.2598	0.6745	BRD-K36467523	bindarit
CTSB	HT29	0.00132292	0.048854	0.70017	0.70017	0.00793914	-0.19715	1.226	0.978	-0.4931	-0.4931	1.6182	BRD-A63236097	andrographolide
CTSB	PC3	0.00132465	0.177599	0.0116137	0.0116137	0.275998	-0.0636	-0.533	-0.5415	-0.7513	-0.7513	-0.59365	BRD-K04887706	AKT-inhibitor-1-2
CTSB	PC3	0.00132532	0.847392	0.186802	0.186802	0.315257	-0.0636	0.3005	-0.0207	0.058	0.058	0.4019	BRD-K56343971	vemurafenib
CTSB	HA1E	0.00132836	0.284893	0.0393684	0.0393684	0.0742701	-0.0725	-0.6829	-0.6651	-0.6651	-0.6651	-1.5605	BRD-K65678996	nefiracetam
CTSB	A375	0.00133213	0.0273236	0.0019085	0.0019085	0.0119676	-0.1133	1.05905	1.5427	1.1164	1.1164	2.4423	BRD-K60997853	PHA-848125
CTSB	MCF7	0.00133272	0.265615	0.0123041	0.0123041	0.314914	-0.2102	0.5382	0.144	0.57535	0.57535	-0.0214	BRD-A29854054	lorglumide
CTSB	HA1E	0.00133378	0.775005	0.0148955	0.0148955	0.613626	-0.0725	0.36065	-0.09285	0.1933	0.1933	-0.03685	BRD-K36740062	GSK-1070916
CTSB	HA1E	0.00134137	0.116098	0.0491209	0.0491209	0.230788	-0.0725	-0.6352	-0.8345	-0.4122	-0.4122	-0.5691	BRD-K71480163	GDC-0068
CTSB	HA1E	0.00134417	0.640831	0.623152	0.623152	0.004961	-0.0725	1.5536	-0.0159	-0.0159	-0.0159	1.5987	BRD-K14619660	altrenogest
CTSB	HCC515	0.00134747	0.0283919	0.036061	0.036061	0.01442	-0.4432	0.24855	0.2758	0.0473	0.0473	0.8076	BRD-K25340465	OSI-930
CTSB	A375	0.00135165	0.193463	0.151134	0.151134	0.84807	-0.1133	0.5436	1.005	0.226	0.226	-0.3198	BRD-K23499943	alvespimycin
CTSB	HA1E	0.00135761	0.250102	0.096614	0.096614	0.0636208	-0.0725	0.5137	1.5615	0.6211	0.6211	1.5349	BRD-K50590187	capsaicin
CTSB	MCF7	0.00136917	0.0201311	0.00045937	0.00045937	0.100952	-0.2102	-0.652	-0.75	-0.8637	-0.8637	-0.8066	BRD-K16189898	CHIR-99021
CTSB	MCF7	0.00137013	0.0776394	0.0409397	0.0409397	0.16393	-0.2102	0.46275	0.762	0.4608	0.4608	0.0775	BRD-K02079473	oxatomide
CTSB	A375	0.00137428	0.0580611	0.000219599	0.000219599	0.356456	-0.1133	-0.8482	-1.176	-1.176	-1.176	-0.5934	BRD-K24968862	SB-683698
CTSB	A549	0.00137697	0.000497967	0.185541	0.0170667	0.00156972	0	0.5527	1.063	0.2265	0.5527	0.8556	BRD-K87737963	CYT387
CTSB	MCF7	0.00137976	0.105867	0.0120225	0.0120225	0.582118	-0.2102	0.48415	0.4208	0.4635	0.4635	0.2767	BRD-K68870568	flumatinib
CTSB	PC3	0.00138396	0.024925	0.0107558	0.0107558	0.58626	-0.0636	-0.5576	-2.18235	-1.12255	-1.12255	-0.3614	BRD-K88358234	xaliproden
CTSB	HCC515	0.00138912	0.476252	0.0199712	0.0199712	0.796762	-0.4432	0.10105	-0.4485	0.2144	0.2144	-0.7012	BRD-K50000283	PHA-767491
CTSB	HA1E	0.00138974	0.00299725	2.21714e-06	2.21714e-06	0.381695	-0.0725	1.9313	4.0123	2.2463	2.2463	-2.70535	BRD-K22848513	bardoxolone-methyl
CTSB	HT29	0.00139117	0.400952	0.59149	0.59149	0.00748609	-0.19715	1.3621	-0.0705	-0.2463	-0.2463	2.1203	BRD-K28822270	resminostat
CTSB	PC3	0.00139508	0.560614	0.117459	0.117459	0.0381934	-0.0636	-0.56985	-0.13035	-0.14695	-0.14695	-0.98595	BRD-K37764012	PF-03758309
CTSB	HA1E	0.00139575	0.502054	0.0986394	0.0986394	0.16948	-0.0725	0.74545	0.3485	0.3485	0.3485	0.9856	BRD-K26341917	L-ergothioneine
CTSB	A375	0.00140792	0.00700006	0.00372628	0.00372628	0.261424	-0.1133	-0.54505	-1.9769	-1.0741	-1.0741	-0.3607	BRD-K70358946	aripiprazole
CTSB	A375	0.00140792	0.052401	0.0760263	0.0760263	0.106956	-0.1133	-0.73615	-0.7298	-0.5875	-0.5875	-0.7879	BRD-K13094524	PFI-1
CTSB	HEPG2	0.0014154	0.527563	0.444286	0.444286	0.0791899	-0.2475	0.39855	-0.5152	-0.0121	-0.0121	0.3091	BRD-K97764662	PD-173074
CTSB	PC3	0.0014247	0.618307	0.0941012	0.0941012	0.0153172	-0.0636	0.6838	0.1732	0.4248	0.4248	0.9251	BRD-K58736316	cianidanol
CTSB	HA1E	0.00142883	0.0122136	0.0089979	0.0089979	0.296577	-0.0725	0.75795	1.129	0.8591	0.8591	0.2554	BRD-K92657060	zaleplon
CTSB	PC3	0.00142889	0.303989	0.774321	0.774321	0.0146002	-0.0636	2.0762	-0.6521	-0.0231	-0.0231	4.0507	BRD-K99792991	hexachlorophene
CTSB	A375	0.00143015	0.120134	0.00369253	0.00369253	0.201125	-0.1133	-0.6918	-0.5929	-0.7658	-0.7658	-0.7658	BRD-K64622987	torcetrapib
CTSB	HA1E	0.00143904	0.0180255	0.0187951	0.0187951	0.119566	-0.0725	1.2505	2.55835	1.46705	1.46705	1.7389	BRD-K19085898	darapladib
CTSB	A375	0.00143933	0.183261	0.0756534	0.0756534	0.268142	-0.1133	-0.55625	-0.5805	-0.4519	-0.4519	-0.532	BRD-K01029106	picolinic-acid
CTSB	HA1E	0.00144274	0.880687	0.0566902	0.0566902	0.159722	-0.0725	-0.6165	0.0887	-0.4449	-0.4449	-0.5851	BRD-K53972329	ruxolitinib
CTSB	PC3	0.0014437	0.287589	0.0369613	0.0369613	0.102037	-0.0636	0.6517	0.536	0.7296	0.7296	1.7509	BRD-K71221037	birinapant
CTSB	PC3	0.00145301	0.907302	0.0835715	0.0835715	0.00674559	-0.0636	0.6219	0.0365	0.2156	0.2156	1.6221	BRD-K34185671	AMG-517
CTSB	MCF7	0.00145631	0.414518	0.150678	0.150678	0.4521	-0.2102	0.39055	0.0211	0.0211	0.0211	-0.1181	BRD-K41185545	ambrisentan
CTSB	HCC515	0.00146487	0.0106653	0.112671	0.112671	0.0497991	-0.4432	0.58545	0.7602	0.5323	0.5323	1.4006	BRD-K53414658	tivozanib
CTSB	HEPG2	0.00146803	0.226395	0.0101298	0.0101298	0.890952	-0.2475	0.3933	0.5438	0.5438	0.5438	-0.413	BRD-K54997624	alpelisib
CTSB	HT29	0.00147371	0.872429	0.220553	0.220553	0.0366691	-0.19715	0.64415	-0.1625	0.1077	0.1077	1.0612	BRD-K67277431	picotamide
CTSB	A375	0.00147544	0.647563	0.190443	0.190443	0.556879	-0.1133	0.403	-0.2915	0.2029	0.2029	-0.0772	BRD-K04801023	SAR-245408
CTSB	A549	0.00148353	0.00529723	0.000199898	0.000199898	0.0435088	0	0.6059	1.1392	0.8267	0.8267	0.6059	BRD-K53414658	tivozanib
CTSB	HT29	0.00149002	0.22515	0.0324231	0.0324231	0.0455534	-0.19715	-0.7823	-0.6745	-0.7264	-0.7264	-0.907	BRD-K42679050	Y-27152
CTSB	PC3	0.00149331	0.0590852	0.490376	0.490376	0.467448	-0.0636	0.942	0.9099	0.159	0.159	0.6942	BRD-K18961567	LY-2801653
CTSB	HA1E	0.00149966	0.389386	0.00348802	0.00348802	0.320175	-0.0725	0.5336	0.1003	0.8441	0.8441	0.6388	BRD-K82603084	ethylenediaminetetraacetic-acid
CTSB	HT29	0.00150258	0.250266	0.73658	0.73658	0.0224242	-0.19715	0.77045	0.9894	-0.3196	-0.3196	1.2443	BRD-K42098891	protriptyline
CTSB	A375	0.00150768	0.437012	0.630858	0.630858	0.140062	-0.1133	0.1888	-0.24045	0	0	0.209	BRD-K42805893	osimertinib
CTSB	A375	0.00150935	0.425622	0.220221	0.220221	0.0135813	-0.1133	-0.5492	-0.0938	-0.3932	-0.3932	-1.06275	BRD-K16189898	CHIR-99021
CTSB	A375	0.00151133	0.315394	0.04959	0.04959	0.066874	-0.1133	0.5233	0	0.4979	0.4979	0.6745	BRD-K19741547	vernakalant
CTSB	MCF7	0.00151292	0.83412	0.213071	0.213071	0.113268	-0.2102	-0.8881	-0.12675	-0.6383	-0.6383	-0.8881	BRD-K90789829	nefazodone
CTSB	HEPG2	0.00151787	0.11212	0.0753381	0.0753381	0.0367307	-0.2475	0.6994	0.8108	0.2766	0.2766	1.1184	BRD-K68174511	torin-2
CTSB	HA1E	0.00152137	0.0135118	0.00892146	0.00892146	0.00296858	-0.0725	1.7766	2.7606	2.12795	2.12795	3.5549	BRD-K52020312	metronidazole
CTSB	MCF7	0.00153094	0.415292	0.0300058	0.0300058	0.0534283	-0.2102	0.3384	0.0977	0.4456	0.4456	0.7272	BRD-K56810756	fomepizole
CTSB	A375	0.00153431	0.203552	0.0139127	0.0139127	0.518414	-0.1133	0.3197	0.0548	0.1705	0.1705	0.4689	BRD-K91740057	felbinac
CTSB	PC3	0.00154874	0.327821	0.464098	0.464098	0.00360794	-0.0636	1.25925	0.1626	0	0	2.3162	BRD-A67097164	ifosfamide
CTSB	HT29	0.00155544	0.38265	0.0593515	0.0593515	0.0579927	-0.19715	0.4775	-0.0097	0.2056	0.2056	0.5175	BRD-K73237276	tacalcitol
CTSB	A375	0.00155764	0.0526397	0.159091	0.159091	0.153633	-0.1133	-0.66615	-1.1655	-0.3622	-0.3622	-0.4843	BRD-A74667430	etodolac
CTSB	PC3	0.0015636	0.476323	0.657978	0.657978	0.0181261	-0.0636	-0.59035	-0.09865	-0.01055	-0.01055	-1.2155	BRD-K19540840	saracatinib
CTSB	MCF7	0.00156591	0.248022	0.785588	0.785588	0.0978447	-0.2102	0.464	0.3641	-0.22825	-0.22825	0.464	BRD-K13646352	midostaurin
CTSB	A375	0.00157263	0.122726	0.0143457	0.0143457	0.965217	-0.1133	0.42665	0.7177	0.4681	0.4681	-0.0438	BRD-A54880345	etomidate
CTSB	HT29	0.0015825	0.356819	0.0167044	0.0167044	0.662286	-0.19715	0.4764	0.3122	0.6071	0.6071	-0.454	BRD-K00152668	adarotene
CTSB	HT29	0.00158578	0.626149	0.106189	0.106189	0.0634212	-0.19715	0.51275	0.1699	0.1708	0.1708	1.2951	BRD-A02367930	ethinyl-estradiol
CTSB	MCF7	0.00159476	0.252123	0.588611	0.588611	0.348229	-0.2102	0.32545	0.03695	-0.13955	-0.13955	0.19935	BRD-K03063480	PF-477736
CTSB	MCF7	0.00159598	0.0897172	0.0305418	0.0305418	0.691416	-0.2102	0.5756	0.6654	0.4858	0.4858	-0.2691	BRD-K20722021	CEP-32496
CTSB	HT29	0.00159658	0.15324	0.0405997	0.0405997	0.640428	-0.19715	0.28355	0.31	0.1288	0.1288	0.0522	BRD-K81528515	nilotinib
CTSB	MCF7	0.00160504	0.00867194	0.00361834	0.00361834	0.254169	-0.2102	-1.11675	-1.8772	-1.2215	-1.2215	-1.5164	BRD-K09090949	CP-945598
CTSB	HA1E	0.00160645	0.84048	0.0760081	0.0760081	0.0325329	-0.0725	0.6974	-0.3937	0.6661	0.6661	0.8951	BRD-K32164935	tolazamide
CTSB	HA1E	0.00161467	0.574445	0.478327	0.478327	0.0604543	-0.0725	0.4378	0.2703	0.1584	0.1584	1.9979	BRD-K13646352	midostaurin
CTSB	HA1E	0.00162084	0.737892	0.035082	0.035082	0.0797784	-0.0725	-0.8164	0.0318	-0.7389	-0.7389	-2.2769	BRD-K82225283	isosorbide-mononitrate
CTSB	HCC515	0.00164019	0.240945	0.473342	0.473342	0.0843358	-0.4432	0.40365	0.2621	-0.557	-0.557	0.5452	BRD-A13021932	BMS-509744
CTSB	HT29	0.00166061	0.13477	0.0421553	0.0421553	0.34584	-0.19715	-0.95795	-0.8949	-0.8949	-0.8949	0.1289	BRD-K07857022	alvimopan
CTSB	A375	0.00166089	0.802294	0.426352	0.426352	0.0312445	-0.1133	0.37255	-0.0737	0	0	0.7636	BRD-A40084411	CGP-12177
CTSB	A549	0.00166199	0.273873	0.437964	0.437964	0.0294233	0	0.5822	0.3452	0.3452	0.3452	1.2107	BRD-K90382497	GW-843682X
CTSB	PC3	0.00168129	0.0528533	0.0179241	0.0179241	0.233231	-0.0636	-0.52495	-0.8919	-0.5045	-0.5045	-0.6176	BRD-K56751279	Y-39983
CTSB	A375	0.00168711	0.0245748	0.000184872	0.000184872	0.0946592	-0.1133	0.577	0.86	0.8607	0.8607	-0.7008	BRD-A15909516	rebamipide
CTSB	HA1E	0.00169937	0.357261	0.0125228	0.0125228	0.198254	-0.0725	0.45775	0.35435	0.6284	0.6284	0.50735	BRD-K26325692	API-001
CTSB	HA1E	0.00170825	0.111931	0.134667	0.134667	0.13209	-0.0725	0.7018	0.7018	0.5083	0.5083	0.6513	BRD-K44876623	zolpidem
CTSB	HT29	0.00170935	0.254913	0.0559665	0.0559665	0.0822725	-0.19715	-0.8296	-0.75785	-0.741	-0.741	-0.7927	BRD-K79239947	PF-573228
CTSB	HT29	0.00171503	0.0274512	0.00910206	0.00910206	0.435891	-0.19715	0.50475	0.9205	0.8127	0.8127	0.2729	BRD-K92657060	zaleplon
CTSB	HA1E	0.00172138	0.259131	0.176684	0.176684	0.463694	-0.0725	-0.9321	-0.734	-0.7234	-0.7234	-1.2863	BRD-K03390685	cobimetinib
CTSB	HA1E	0.00172608	0.657472	0.260865	0.260865	0.326201	-0.0725	0.4891	0.0784	0.1065	0.1065	0.4397	BRD-K07572174	curcumin
CTSB	HA1E	0.00172634	0.0496922	0.00237245	0.00237245	0.233481	-0.0725	-0.5937	-0.749	-0.70975	-0.70975	-0.5088	BRD-U22633929	XMD11-85H
CTSB	HT29	0.00173775	0.0748915	0.0859343	0.0859343	0.0609285	-0.19715	0.5582	0.9676	0.3941	0.3941	0.5582	BRD-K07609981	dexloxiglumide
CTSB	HT29	0.00174198	0.181611	0.00504736	0.00504736	0.149945	-0.19715	-0.77945	-1.05785	-1.06085	-1.06085	-0.8712	BRD-K21396683	marimastat
CTSB	HEPG2	0.00176524	0.217243	0.00582138	0.00582138	0.235818	-0.2475	-0.7928	-0.5894	-1.271	-1.271	-0.5078	BRD-K05104363	PD-184352
CTSB	MCF7	0.00177317	0.611527	0.874361	0.874361	0.0253282	-0.2102	0.51715	-0.2272	-0.1319	-0.1319	0.6203	BRD-K71480163	GDC-0068
CTSB	HT29	0.0017979	0.0538716	0.0330336	0.0330336	0.0247959	-0.19715	-0.84425	-0.9976	-0.9221	-0.9221	-1.0535	BRD-K63828191	raloxifene
CTSB	HA1E	0.0018068	0.806776	0.320991	0.320991	0.206661	-0.0725	0.7164	0.0775	0.0775	0.0775	0.5254	BRD-U86686840	AZD-7762
CTSB	HA1E	0.00182267	0.483127	0.0514191	0.0514191	0.011534	-0.0725	0.77615	0.2258	0.2258	0.2258	1.1187	BRD-K43966364	penicillin-v-potassium
CTSB	A375	0.00184131	0.0899208	0.0167698	0.0167698	0.371209	-0.1133	-0.88425	-0.86	-0.86	-0.86	-0.5173	BRD-K81795818	exherin
CTSB	MCF7	0.00184136	0.0037818	0.190942	0.190942	0.355837	-0.2102	-2.61115	-4.0369	-1.2038	-1.2038	-1.53445	BRD-K76674262	homoharringtonine
CTSB	A375	0.00184258	0.0713693	0.0447516	0.0447516	0.376474	-0.1133	0.41555	0.4461	0.385	0.385	0.1886	BRD-K36862742	hydroflumethiazide
CTSB	PC3	0.00185598	0.314657	0.646275	0.646275	0.300443	-0.0636	0.5831	0.5652	-0.222	-0.222	0.427	BRD-K43578482	defactinib
CTSB	A375	0.00185632	0.0485351	0.00164291	0.00164291	0.365375	-0.1133	-0.6745	-0.9373	-0.9373	-0.9373	0.25535	BRD-K04853698	LDN-193189
CTSB	MCF7	0.00186227	0.999164	0.685217	0.685217	0.108253	-0.2102	0.0962	0	0	0	0.1366	BRD-K53414658	tivozanib
CTSB	HCC515	0.00186902	0.139011	0.964958	0.964958	0.0279985	-0.4432	0.3874	0.0257	-0.5839	-0.5839	0.3756	BRD-K03063480	PF-477736
CTSB	MCF7	0.00187188	0.240893	0.70842	0.70842	0.31059	-0.2102	0.4852	0.2478	-0.0378	-0.0378	0.5593	BRD-K23190681	AV-412
CTSB	HT29	0.00189728	0.290594	0.00478368	0.00478368	0.534893	-0.19715	0.40575	0.181	0.9084	0.9084	0.0443	BRD-K03384561	roquinimex
CTSB	A375	0.00190837	0.306736	0.00161456	0.00161456	0.309294	-0.1133	0.54655	0.0374	0.8892	0.8892	0.4186	BRD-K44353683	nateglinide
CTSB	A375	0.00192126	0.00351932	2.68449e-05	2.68449e-05	0.465948	-0.1133	1.06075	2.5584	2.3696	2.3696	0.6818	BRD-K89561498	SN-38
CTSB	PC3	0.00192487	0.39251	0.214449	0.214449	0.0128551	-0.0636	0.9182	0.6945	0.6945	0.6945	0.9586	BRD-A04352665	maraviroc
CTSB	A549	0.00193215	0.0572804	0.559536	0.559536	0.0611316	0	0.4968	0.62175	0.1554	0.1554	0.7332	BRD-K21718444	KW-2449
CTSB	A375	0.00193945	0.94531	0.212455	0.212455	0.107597	-0.1133	-0.65065	0.4203	-0.3401	-0.3401	-0.7316	BRD-K81458380	CX-4945
CTSB	HT29	0.00195089	0.0599513	0.00328596	0.00328596	0.232991	-0.19715	0.3515	1.2528	0.6463	0.6463	0.513	BRD-A87130939	masoprocol
CTSB	HCC515	0.00195397	0.391139	0.388152	0.388152	0.049799	-0.4432	-0.04475	-0.2347	-0.364	-0.364	0.4179	BRD-K93918653	quizartinib
CTSB	PC3	0.00195951	0.257872	0.153425	0.153425	0.160527	-0.0636	0.52035	0.454	0.2611	0.2611	0.8178	BRD-A04553218	chlorphenamine
CTSB	MCF7	0.00196221	0.605845	0.251422	0.251422	0.65846	-0.2102	0.48985	-0.4272	0.1301	0.1301	0.0762	BRD-K37385792	conivaptan
CTSB	PC3	0.00196624	0.0949851	0.102358	0.102358	0.375855	-0.0636	-0.8336	-2.0494	-0.3319	-0.3319	-0.4838	BRD-K09549677	mibefradil
CTSB	HT29	0.00197611	0.124643	0.014383	0.014383	0.292176	-0.19715	0.3916	0.7702	0.3719	0.3719	0.508	BRD-K98769987	flumazenil
CTSB	A375	0.00198962	0.0459152	0.00973204	0.00973204	0.431337	-0.1133	0.5179	0.5851	0.5851	0.5851	0.7427	BRD-K68336408	tyrphostin-AG-1478
CTSB	PC3	0.00199199	0.952179	0.161377	0.161377	0.622893	-0.0636	-1.0748	0.021	-0.3472	-0.3472	-0.1953	BRD-K60997853	PHA-848125
CTSB	MCF7	0.00200265	0.0269665	0.00876433	0.00876433	0.505561	-0.2102	0.4305	0.5516	0.52885	0.52885	0.1566	BRD-K19741547	vernakalant
CTSB	HEPG2	0.00200519	0.121523	0.0286717	0.0286717	0.92077	-0.2475	0.29505	0.6745	0.281	0.281	-0.4861	BRD-K46056750	AZD-7762
CTSB	PC3	0.00200921	0.546321	0.192726	0.192726	0.546868	-0.0636	-0.7743	-0.842	-0.69835	-0.69835	-0.4001	BRD-K02113016	olaparib
CTSB	HT29	0.00201937	0.151772	0.200234	0.200234	0.0195185	-0.19715	1.0361	1.7266	0.257	0.257	1.7059	BRD-K74057757	indibulin
CTSB	PC3	0.00202221	0.9705	0.126206	0.126206	0.161423	-0.0636	0.78755	0.1415	0.5543	0.5543	1.072	BRD-K74057757	indibulin
CTSB	A549	0.00202656	0.0114214	0.000733985	0.000733985	0.00435476	0	-0.58385	-2.2049	-0.6322	-0.6322	-1.5284	BRD-K12502280	TG-101348
CTSB	HT29	0.00203581	0.179469	0.0148442	0.0148442	0.0451809	-0.19715	-0.65655	-0.4964	-0.6765	-0.6765	-1.2619	BRD-K22482860	dalfampridine
CTSB	A375	0.00203824	0.452865	0.0830989	0.0830989	0.129769	-0.1133	-0.6329	-0.6219	-0.6219	-0.6219	-0.7322	BRD-K79239947	PF-573228
CTSB	A549	0.00203887	0.524906	0.605022	0.605022	0.00313154	0	-0.2349	0.287	0	0	-1.1383	BRD-K25311561	KU-55933
CTSB	PC3	0.00204039	0.510107	0.205338	0.205338	0.0431772	-0.0636	-0.9691	-1.3394	-0.6035	-0.6035	-1.0162	BRD-K61397605	romidepsin
CTSB	PC3	0.00204584	0.0818358	0.0507477	0.0507477	0.414447	-0.0636	-0.78445	-2.0118	-1.7694	-1.7694	-0.4303	BRD-A21584801	brivanib
CTSB	A375	0.00205332	0.178312	0.134878	0.134878	0.0551395	-0.1133	0.49375	0.692	0.4094	0.4094	0.5592	BRD-A65280694	molindone
CTSB	MCF7	0.0020578	0.0880244	0.00174695	0.00174695	0.0858623	-0.2102	-1.075	-1.4832	-1.4832	-1.4832	-1.5762	BRD-A61767428	ursolic-acid
CTSB	HEPG2	0.00206222	0.19048	0.524692	0.524692	0.0040569	-0.2475	0.5567	0.5567	-0.10265	-0.10265	1.2215	BRD-K03449891	foretinib
CTSB	HCC515	0.00206519	0.0147521	0.237409	0.237409	0.0334972	-0.4432	0.2491	0.5395	-0.2517	-0.2517	0.1637	BRD-K85402309	dovitinib
CTSB	PC3	0.00207324	0.0221457	0.00378621	0.00378621	0.707056	-0.0636	-0.8236	-1.4522	-1.1386	-1.1386	-0.6293	BRD-K91290917	amodiaquine
CTSB	HEPG2	0.00208658	0.0147601	0.0556332	0.0556332	0.043224	-0.2475	0.45825	1.0683	0.4876	0.4876	0.4289	BRD-K89391146	RG-108
CTSB	HA1E	0.00209049	0.558454	0.240395	0.240395	0.333775	-0.0725	0.3536	-0.1345	0.1728	0.1728	0.079	BRD-K51333959	siramesine
CTSB	HT29	0.00210283	0.328189	0.110764	0.110764	0.00753033	-0.19715	0.8331	2.0767	0.4606	0.4606	2.2495	BRD-U61997977	WZ-4-145
CTSB	HT29	0.00211562	0.352197	0.0198105	0.0198105	0.309484	-0.19715	-0.79985	-0.5876	-0.8182	-0.8182	-0.3261	BRD-K64838454	dipraglurant
CTSB	PC3	0.00211682	0.037851	0.000849322	0.000849322	0.906114	-0.0636	0.48085	0.8822	0.8332	0.8332	-0.0779	BRD-K36269323	asymmetrical-dimethylarginine
CTSB	HT29	0.00211704	0.845269	0.0699716	0.0699716	0.200322	-0.19715	-0.73645	-0.3897	-0.858	-0.858	-0.6149	BRD-K81458380	CX-4945
CTSB	MCF7	0.00212301	0.00780578	0.0025068	0.0025068	0.069444	-0.2102	0.5196	1.336	0.6576	0.6576	0.2994	BRD-K44876623	zolpidem
CTSB	HT29	0.00213278	0.0227757	0.00191051	0.00191051	0.1173	-0.19715	-0.8796	-1.3108	-0.8906	-0.8906	-1.399	BRD-A21607826	medetomidine
CTSB	A375	0.00214312	0.209438	0.481309	0.481309	0.0363761	-0.1133	0.4958	0.4438	0.11265	0.11265	0.6151	BRD-K64755930	etazolate
CTSB	A375	0.00214446	0.967951	0.038007	0.038007	0.462658	-0.1133	-0.70595	0	-0.81	-0.81	-0.2361	BRD-K68232413	etizolam
CTSB	MCF7	0.00215896	0.343293	0.120578	0.120578	0.975531	-0.2102	-1.1672	-0.1015	-0.7778	-0.7778	0	BRD-A62525898	prednisone
CTSB	A375	0.00216286	0.0997972	0.0508493	0.0508493	0.98707	-0.1133	-0.6745	-0.6745	-0.6745	-0.6745	-0.11545	BRD-K38744518	betulinic-acid
CTSB	HT29	0.00216312	0.328678	0.0451847	0.0451847	0.536846	-0.19715	0.4143	0.257	0.257	0.257	-0.3446	BRD-K37385792	conivaptan
CTSB	HA1E	0.00217921	0.0555094	0.0230887	0.0230887	0.279825	-0.0725	0.8574	1.1263	0.4161	0.4161	0.9502	BRD-K83405785	pimavanserin
CTSB	PC3	0.00218411	0.0143341	0.0600104	0.0600104	0.926337	-0.0636	-1.0763	-1.4303	-1.1822	-1.1822	0.1147	BRD-K16508793	diazepam
CTSB	HCC515	0.0021902	0.285288	0.0111263	0.0111263	0.261305	-0.4432	0.29695	0.3614	0.4264	0.4264	0.1459	BRD-K09991945	GSK-3-inhibitor-II
CTSB	A375	0.00219202	0.239224	0.0708948	0.0708948	0.476199	-0.1133	0.3848	1.094	0.3413	0.3413	0	BRD-K62996583	lidoflazine
CTSB	A375	0.00219657	0.26793	0.00187417	0.00187417	0.440573	-0.1133	0.60965	0.4151	0.897	0.897	-0.6043	BRD-K61250553	loperamide
CTSB	A549	0.00220768	0.918579	0.785542	0.785542	0.0431714	0	0.4198	0.2779	0.0853	0.0853	0.82695	BRD-K53328210	JW55
CTSB	HT29	0.00221755	0.12525	0.0194224	0.0194224	0.072267	-0.19715	-0.7409	-0.8248	-0.7294	-0.7294	-1.1213	BRD-K88560311	rucaparib
CTSB	A375	0.00222006	0.338851	0.0581507	0.0581507	0.392544	-0.1133	0.37275	0.3237	0.3237	0.3237	0.3791	BRD-K32101625	LX-1031
CTSB	HT29	0.00222433	0.785805	0.0631942	0.0631942	0.969653	-0.19715	-0.9165	0.2779	-0.9165	-0.9165	-0.5153	BRD-K60240222	carglumic-acid
CTSB	A549	0.00223721	0.964204	0.373267	0.373267	0.294434	0	0.2489	0.03615	0.16715	0.16715	-0.20415	BRD-K36740062	GSK-1070916
CTSB	HT29	0.00223844	0.0437197	0.519914	0.519914	0.612807	-0.19715	0.5159	0.8848	0.19055	0.19055	-0.0228	BRD-K99545815	PF-562271
CTSB	MCF7	0.00223986	0.3093	0.170025	0.170025	0.0541006	-0.2102	-0.79975	-0.8002	-0.7311	-0.7311	-1.1283	BRD-A03061970	alizapride
CTSB	A375	0.00224825	0.156478	0.0208212	0.0208212	0.290564	-0.1133	-0.6159	-0.6159	-0.6916	-0.6916	-0.367	BRD-A67373739	AICA-ribonucleotide
CTSB	PC3	0.00225534	0.363919	0.135355	0.135355	0.0239157	-0.0636	-0.998	-1.70605	-0.75295	-0.75295	-2.2141	BRD-K42898655	temsirolimus
CTSB	HA1E	0.00227414	0.0708247	0.0244775	0.0244775	0.123474	-0.0725	-0.8177	-0.8177	-0.8177	-0.8177	-2.21175	BRD-K91456750	sacubitril
CTSB	PC3	0.00227645	0.311359	0.0689117	0.0689117	0.056591	-0.0636	-0.7261	-0.5076	-0.52635	-0.52635	-1.02025	BRD-K51544265	cabozantinib
CTSB	HA1E	0.00228504	0.596438	0.339017	0.339017	0.275252	-0.0725	0.4716	-0.0596	0.0486	0.0486	0.2581	BRD-K28731095	calcitriol
CTSB	A375	0.00229965	0.779272	0.0394442	0.0394442	0.980455	-0.1133	0.6297	-0.0631	0.4042	0.4042	-0.0615	BRD-K31313613	BS-181
CTSB	A375	0.00230729	0.187982	0.00407259	0.00407259	0.0427084	-0.1133	-0.8023	-0.3109	-0.6583	-0.6583	-0.9463	BRD-K17953908	LY-2886721
CTSB	A375	0.00234269	0.384994	0.0338895	0.0338895	0.112948	-0.1133	-0.75485	-0.7637	-0.7637	-0.7637	-0.746	BRD-K55013654	lorcaserin
CTSB	HT29	0.00236269	0.142404	0.0938747	0.0938747	0.0765617	-0.19715	-0.6759	-0.4764	-0.4677	-0.4677	-1.16975	BRD-A19795905	atovaquone
CTSB	PC3	0.00236899	0.758199	0.00286256	0.00286256	0.717487	-0.0636	-1.061	-0.2245	-1.2424	-1.2424	0.3736	BRD-A33168282	sotalol
CTSB	HCC515	0.00237671	0.462789	0.685515	0.685515	0.238754	-0.4432	0.2074	0.167	-0.35445	-0.35445	0.0072	BRD-K82928847	ACY-1215
CTSB	HT29	0.00238048	0.388059	0.416108	0.416108	0.0301221	-0.19715	0.51845	-0.402	0.0074	0.0074	0.9313	BRD-K56291712	voxtalisib
CTSB	A375	0.00238338	0.0995956	0.0736745	0.0736745	0.0426082	-0.1133	0.5969	0.3848	0.3848	0.3848	0.7306	BRD-A22769835	homochlorcyclizine
CTSB	A375	0.00239441	0.115078	0.0244724	0.0244724	0.159363	-0.1133	-0.74725	-1.2207	-0.82	-0.82	-0.6745	BRD-K03353589	ecabet
CTSB	HT29	0.00239641	0.0621645	0.0725622	0.0725622	0.111075	-0.19715	0.6136	0.6444	0.6267	0.6267	0.6005	BRD-K70463136	BAY-87-2243
CTSB	HEPG2	0.00240012	0.356498	0.0353065	0.0353065	0.568744	-0.2475	0.3039	0.0534	0.1538	0.1538	-0.1144	BRD-K51544265	cabozantinib
CTSB	HA1E	0.00240493	0.378901	0.00230383	0.00230383	0.12133	-0.0725	0.396	0.1995	1.2169	1.2169	0.4267	BRD-K78513633	lonidamine
CTSB	HA1E	0.00240512	0.790054	0.0452682	0.0452682	0.15812	-0.0725	0.63045	-0.2519	0.3372	0.3372	1.1445	BRD-K96720755	relcovaptan
CTSB	A375	0.00241032	0.0484792	0.00161769	0.00161769	0.0363324	-0.1133	-1.06625	-1.2179	-1.4466	-1.4466	-1.1501	BRD-K32977963	eugenol
CTSB	MCF7	0.00241298	0.163385	0.0997153	0.0997153	0.105964	-0.2102	-0.66335	-0.492	-0.4455	-0.4455	-1.2411	BRD-K81272440	dantrolene
CTSB	HCC515	0.00241695	0.53579	0.438277	0.438277	0.0656017	-0.4432	0.2841	0.226	0.0568	0.0568	0.3624	BRD-K36363294	I-BET-151
CTSB	HA1E	0.00243079	0.353073	0.0703273	0.0703273	0.0480557	-0.0725	-0.6487	-0.6013	-0.4326	-0.4326	-0.9498	BRD-K45071273	tetracaine
CTSB	A375	0.00243911	0.169321	0.00888937	0.00888937	0.0424582	-0.1133	-0.47885	-1.2925	-0.7767	-0.7767	-1.4349	BRD-K82234479	tramiprosate
CTSB	A375	0.00247969	0.110301	0.0724089	0.0724089	0.477414	-0.1133	-0.7659	-0.8782	-0.3622	-0.3622	-0.3643	BRD-A73908300	EX-527
CTSB	HA1E	0.00248781	0.00298766	2.65749e-07	2.65749e-07	0.302538	-0.0725	3.12935	4.3252	4.7726	4.7726	1.4682	BRD-K88510285	bortezomib
CTSB	HCC515	0.00249719	0.030854	0.0109283	0.0109283	0.641385	-0.4432	0.3704	0.6594	0.4959	0.4959	-0.5535	BRD-K26818574	BIX-01294
CTSB	HT29	0.00250845	0.319707	0.0551045	0.0551045	0.0188082	-0.19715	0.4081	0.4876	0.4876	0.4876	2.0274	BRD-A18917088	estradiol
CTSB	MCF7	0.00251319	0.409633	0.0131664	0.0131664	0.0739208	-0.2102	0.4847	0.3444	0.5093	0.5093	0.4601	BRD-K94293891	suvorexant
CTSB	HA1E	0.00251761	0.184583	0.316995	0.316995	0.121448	-0.0725	0.36725	0.3372	0.1704	0.1704	0.3842	BRD-K38183498	clonazepam
CTSB	HT29	0.00253256	0.0822629	0.0640142	0.0640142	0.144431	-0.19715	0.514	0.99735	0.3204	0.3204	0.514	BRD-K92441787	bexarotene
CTSB	HA1E	0.002544	0.156963	0.800652	0.800652	0.00484098	-0.0725	0.6417	0.5756	0.0784	0.0784	3.0049	BRD-A60245366	AS-601245
CTSB	PC3	0.00254581	0.114861	0.00704122	0.00704122	0.176271	-0.0636	0.77255	0.7672	0.7672	0.7672	0.9671	BRD-K01174345	anamorelin
CTSB	PC3	0.00254923	0.0800101	0.00798892	0.00798892	0.12695	-0.0636	-0.70875	-1.4304	-1.4304	-1.4304	-0.553	BRD-K01436366	XMD-1150
CTSB	HT29	0.00255432	0.835226	0.098067	0.098067	0.0679113	-0.19715	-0.66375	-0.156	-0.5524	-0.5524	-0.6951	BRD-K54006094	formoterol
CTSB	HT29	0.00255601	0.112187	0.0441851	0.0441851	0.590547	-0.19715	0.7724	1.3496	1.074	1.074	-0.4358	BRD-K44273375	tolnaftate
CTSB	HCC515	0.00256127	0.124961	0.00651405	0.00651405	0.835054	-0.4432	0.06455	0.0924	0.2901	0.2901	-0.4097	BRD-K55187425	rigosertib
CTSB	HEPG2	0.00256341	0.81439	0.794544	0.794544	0.00321974	-0.2475	0.0103	-0.39325	-0.4291	-0.4291	1.7414	BRD-A19500257	geldanamycin
CTSB	A375	0.00256595	0.364173	0.867415	0.867415	0.0125794	-0.1133	-0.7979	-0.4816	-0.1821	-0.1821	-1.2053	BRD-K84996356	AZD-3514
CTSB	A375	0.00257278	0.171306	0.00755441	0.00755441	0.0683458	-0.1133	-0.5939	-0.4789	-1.1419	-1.1419	-1.1419	BRD-K15108141	gemcitabine
CTSB	PC3	0.00257672	0.0276017	5.93825e-05	5.93825e-05	0.201122	-0.0636	0.6864	1.1666	1.1616	1.1616	0.8779	BRD-A13133631	fluorometholone
CTSB	HA1E	0.00259999	0.136035	0.186186	0.186186	0.659521	-0.0725	-0.6262	-0.98065	-0.5279	-0.5279	-0.24555	BRD-K79404599	enzastaurin
CTSB	A549	0.00260158	0.0941339	0.0767137	0.0767137	0.054451	0	-0.5041	-0.3337	-0.2563	-0.2563	-0.6745	BRD-K06569345	HG-5-88-01
CTSB	MCF7	0.00260373	0.768653	0.317445	0.317445	0.00656304	-0.2102	0.259	-0.1222	-0.3368	-0.3368	0.8111	BRD-K04887706	AKT-inhibitor-1-2
CTSB	HA1E	0.00260381	0.359488	0.0165647	0.0165647	0.468511	-0.0725	0.70075	0.9368	0.9483	0.9483	0.5598	BRD-A67516570	lafutidine
CTSB	HEPG2	0.00260469	0.231596	0.118454	0.118454	0.972122	-0.2475	0.34455	0.1397	0.3029	0.3029	-0.2729	BRD-K50000283	PHA-767491
CTSB	HCC515	0.00261738	0.022314	0.295307	0.295307	0.00325543	-0.4432	0.2711	0.4908	-0.0844	-0.0844	1.4246	BRD-U61997977	WZ-4-145
CTSB	A375	0.00261876	0.974202	0.156927	0.156927	0.0563943	-0.1133	0.3383	0	0.2806	0.2806	0.553	BRD-K32107296	temozolomide
CTSB	HA1E	0.00262103	0.602939	0.0163734	0.0163734	0.497052	-0.0725	-0.5531	-0.2039	-0.4317	-0.4317	-0.6745	BRD-K70778732	trazodone
CTSB	MCF7	0.00262511	0.574101	0.0730699	0.0730699	0.371803	-0.2102	0.39005	0.1267	0.4477	0.4477	0.3757	BRD-K38473998	cilomilast
CTSB	A375	0.00263599	0.660291	0.157923	0.157923	0.0222403	-0.1133	0.41095	0	0.1821	0.1821	0.7515	BRD-K63923597	barasertib-HQPA
CTSB	A375	0.00263772	0.2404	0.451403	0.451403	0.594645	-0.1133	0.51565	0.4402	0.3324	0.3324	0.5911	BRD-K80396088	gliquidone
CTSB	HA1E	0.00264009	0.087604	0.0154575	0.0154575	0.171893	-0.0725	-1.1155	-1.2643	-1.2643	-1.2643	-1.1477	BRD-K23248433	camicinal
CTSB	PC3	0.00264309	0.205381	0.220358	0.220358	0.050935	-0.0636	-0.69865	-0.6464	-0.4207	-0.4207	-1.3863	BRD-U60236422	WH-4-025
CTSB	HT29	0.00264552	0.958233	0.0164468	0.0164468	0.118577	-0.19715	-0.83315	-0.2639	-1.0879	-1.0879	-1.0492	BRD-K41708980	triamcinolone-acetonide
CTSB	HA1E	0.0026488	0.777952	0.0424475	0.0424475	0.144251	-0.0725	0.402	-0.2403	0.3228	0.3228	0.4812	BRD-A13084692	troglitazone
CTSB	HA1E	0.00265304	0.0367891	0.00958165	0.00958165	0.0724984	-0.0725	-0.7851	-1.3316	-0.8216	-0.8216	-1.19785	BRD-K41260949	valproic-acid
CTSB	HCC515	0.00267037	0.0848298	0.701509	0.701509	0.547533	-0.4432	0.95655	0.0281	-0.3023	-0.3023	0.24	BRD-K16485616	mocetinostat
CTSB	PC3	0.00267981	0.132997	0.691963	0.691963	0.0560381	-0.0636	-1.07095	-1.0038	-0.55615	-0.55615	-1.5201	BRD-K67844266	pevonedistat
CTSB	A375	0.0026954	0.100201	0.0901044	0.0901044	0.349851	-0.1133	-0.75215	-0.6148	-0.6148	-0.6148	-0.2281	BRD-K07859598	GW-5074
CTSB	HT29	0.00270558	0.128322	0.00475403	0.00475403	0.58714	-0.19715	0.4807	0.4807	0.4807	0.4807	0.2849	BRD-K67783091	haloperidol
CTSB	A375	0.0027095	0.285894	0.0540801	0.0540801	0.0184334	-0.1133	0.78625	1.6204	0.6836	0.6836	1.0829	BRD-K99451608	lopinavir
CTSB	HT29	0.00271037	0.735219	0.0175651	0.0175651	0.0222791	-0.19715	-0.8099	-0.4191	-0.7422	-0.7422	-1.1353	BRD-K33483813	actarit
CTSB	MCF7	0.00272839	0.285063	0.204022	0.204022	0.642869	-0.2102	0.3241	0.1381	0.1381	0.1381	0.0661	BRD-K09991945	GSK-3-inhibitor-II
CTSB	PC3	0.00274682	0.14562	0.0347806	0.0347806	0.730366	-0.0636	0.4488	0.47815	0.441	0.441	-0.2324	BRD-K59317601	MLN-0128
CTSB	HCC515	0.00274841	0.247604	0.0471626	0.0471626	0.38812	-0.4432	0.0257	0.0257	0.0257	0.0257	-0.0749	BRD-K15592317	CP-466722
CTSB	HT29	0.00274873	0.560223	0.102243	0.102243	0.670908	-0.19715	-0.68065	-0.4815	-0.5082	-0.5082	-0.3055	BRD-K91308639	ARN-509
CTSB	HT29	0.00275054	0.987386	0.0569349	0.0569349	0.0540563	-0.19715	0.49405	-0.2647	0.1871	0.1871	0.8036	BRD-K35169477	taranabant
CTSB	HT29	0.00275598	0.0228348	0.00156433	0.00156433	0.350155	-0.19715	0.53005	1.1227	0.59	0.59	1.5211	BRD-K84986517	darunavir
CTSB	HA1E	0.00276075	0.0208312	0.0168359	0.0168359	0.185889	-0.0725	-0.7363	-1.7081	-0.9089	-0.9089	-0.6745	BRD-A33692381	zidovudine
CTSB	HA1E	0.00276477	0.503936	0.0626031	0.0626031	0.716655	-0.0725	0.3311	0.0913	0.3026	0.3026	0.08055	BRD-K50498985	taladegib
CTSB	PC3	0.00276578	0.13226	0.0176129	0.0176129	0.0288954	-0.0636	0.68475	0.8872	0.865	0.865	0.9702	BRD-K70610771	VX-222
CTSB	A375	0.00278674	0.200091	0.198012	0.198012	0.0360709	-0.1133	-0.68235	-1.0816	-0.5749	-0.5749	-1.1481	BRD-A25619068	fadrozole
CTSB	A375	0.00278674	0.647211	0.13688	0.13688	0.0492659	-0.1133	-0.7924	0.3081	-0.5638	-0.5638	-0.9054	BRD-K71799949	carbamazepine
CTSB	HT29	0.00280538	0.650503	0.0503054	0.0503054	0.166997	-0.19715	0.354	0.2825	0.4255	0.4255	0.2	BRD-A29901043	KIN001-127
CTSB	HA1E	0.00281558	0.532616	0.0317152	0.0317152	0.371285	-0.0725	0.3214	0	0.3045	0.3045	0.30335	BRD-K51143828	lurasidone
CTSB	HEPG2	0.00282507	0.00385447	0.316908	0.316908	0.0796505	-0.2475	0.40175	1.5281	-0.022	-0.022	0.6745	BRD-A18328003	GDC-0980
CTSB	A375	0.00285105	0.432486	0.00228504	0.00228504	0.295739	-0.1133	-0.8172	-0.9109	-1.0652	-1.0652	-0.3412	BRD-A59174698	ritodrine
CTSB	HT29	0.00285373	0.695937	0.472897	0.472897	0.0946339	-0.19715	0.3184	-0.3296	0.1028	0.1028	0.4585	BRD-K30685142	levothyroxine
CTSB	A375	0.00287337	0.574112	0.744229	0.744229	0.421365	-0.1133	0.3406	-0.1687	-0.1687	-0.1687	-0.1002	BRD-K14870255	R-428
CTSB	MCF7	0.00287993	0.337581	0.0737384	0.0737384	0.12336	-0.2102	-0.77135	-0.5826	-0.6664	-0.6664	-0.7914	BRD-A26334849	propafenone
CTSB	PC3	0.00288215	0.0378972	0.00554501	0.00554501	0.370491	-0.0636	0.5007	0.8267	0.6673	0.6673	0.4354	BRD-K19388745	colforsin-daproate
CTSB	A375	0.00290052	NA	NA	NA	NA	-0.1133	3.6419	NA	NA	NA	NA	BRD-K92960067	smer-3
CTSB	HT29	0.00292383	0.0544272	0.0170051	0.0170051	0.539455	-0.19715	0.48515	0.5522	0.5522	0.5522	0.0314	BRD-K08547377	irinotecan
CTSB	A375	0.0029376	0.137251	0.0362108	0.0362108	0.535374	-0.1133	0.46215	0.5778	0.476	0.476	0.145	BRD-K97101532	VX-661
CTSB	MCF7	0.00295147	0.195166	0.00947435	0.00947435	0.585215	-0.2102	0.25825	0.2449	0.2716	0.2716	-0.2936	BRD-K26756394	VE-821
CTSB	PC3	0.00296154	0.132517	0.967827	0.967827	0.0236744	-0.0636	0.6782	0.5136	-0.1891	-0.1891	0.7273	BRD-K28822270	resminostat
CTSB	HCC515	0.00298895	0.0762882	0.0173754	0.0173754	0.167324	-0.4432	0.03485	0.3992	0.0697	0.0697	0	BRD-K95435023	PHA-665752
CTSB	HCC515	0.00298901	0.082383	0.313779	0.313779	0.0291931	-0.4432	0.1334	0.1496	-0.137	-0.137	0.3918	BRD-K97056771	GNF-2
CTSB	HA1E	0.00299187	0.264992	0.0735553	0.0735553	0.339965	-0.0725	0.76135	0.9736	0.8108	0.8108	1.0222	BRD-K03289534	lersivirine
CTSB	HCC515	0.0030104	0.100203	0.165911	0.165911	0.0963025	-0.4432	0.02545	0.3526	-0.0461	-0.0461	0.3333	BRD-K75308783	SAR-245409
CTSB	MCF7	0.00301203	0.328124	0.11112	0.11112	0.267167	-0.2102	0.4614	0.1595	0.1595	0.1595	1.415	BRD-K83405785	pimavanserin
CTSB	A549	0.00302286	0.888042	0.533473	0.533473	0.00392672	0	-0.3448	0.4526	0	0	-1.0907	BRD-K60866521	idelalisib
CTSB	PC3	0.00302489	0.984849	0.0678535	0.0678535	0.584223	-0.0636	0.4279	0.0984	0.3641	0.3641	0.0768	BRD-A29485665	bicalutamide
CTSB	HA1E	0.00303108	0.417068	0.00464207	0.00464207	0.254794	-0.0725	0.3628	0.1417	0.7739	0.7739	0.4129	BRD-K04111260	raclopride
CTSB	A549	0.00303292	0.00303292	NA	0.00303292	0.00303292	0	-3.674	-3.674	NA	-3.674	-3.674	BRD-A19037878	trichostatin-a
CTSB	HCC515	0.00303611	0.653197	0.576449	0.576449	0.0990759	-0.4432	0.0682	-0.4694	-0.1227	-0.1227	-0.0115	BRD-K03406345	azacitidine
CTSB	A375	0.00303841	0.654976	0.128796	0.128796	0.474684	-0.1133	0.48375	0.3793	0.3793	0.3793	0.1249	BRD-A10039652	tipranavir
CTSB	HA1E	0.00304293	0.2934	0.0399412	0.0399412	0.804109	-0.0725	0.7219	0.2561	0.6745	0.6745	-0.274	BRD-A78195072	imexon
CTSB	HA1E	0.00305483	0.38184	0.360803	0.360803	0.150435	-0.0725	0.76055	1.1173	0.3046	0.3046	0.6859	BRD-K17075857	chloroxine
CTSB	MCF7	0.00305728	0.0932695	0.950645	0.950645	0.0480926	-0.2102	0.5123	0.8248	-0.3113	-0.3113	0.9752	BRD-A50737080	CGK-733
CTSB	PC3	0.00308336	0.61058	0.00381108	0.00381108	0.783038	-0.0636	0.4862	-0.042	0.7005	0.7005	0.3667	BRD-K01815685	indole-3-carbinol
CTSB	MCF7	0.00308942	0.435051	0.405912	0.405912	0.0515563	-0.2102	0.1056	0.0075	-0.0724	-0.0724	0.20885	BRD-K58772419	AZD-6482
CTSB	HT29	0.00309491	0.369858	0.341434	0.341434	0.022658	-0.19715	0.52515	0.963	0.3988	0.3988	1.3761	BRD-K37720887	SB-525334
CTSB	HCC515	0.0030974	0.956301	0.324448	0.324448	0.0375717	-0.4432	0.51635	-0.4207	-0.4207	-0.4207	0.6344	BRD-K07859598	GW-5074
CTSB	MCF7	0.00309761	0.415809	0.0561068	0.0561068	0.0797875	-0.2102	-0.8231	-1.247	-1.1338	-1.1338	-1.4142	BRD-K50938287	sumatriptan
CTSB	A375	0.00311202	0.122845	0.0247069	0.0247069	0.596343	-0.1133	0.4114	0.4114	0.4114	0.4114	0.4114	BRD-A44863528	proglumide
CTSB	HCC515	0.00311951	0.089382	0.725239	0.725239	0.0310672	-0.4432	0.1881	0.1405	-0.3284	-0.3284	0.2666	BRD-K98203492	GSK-J4
CTSB	A375	0.00312814	0.108888	0.183461	0.183461	0.861911	-0.1133	0.2853	0.3309	0.2705	0.2705	-0.3386	BRD-K73088654	floxuridine
CTSB	A375	0.00314633	0.159653	0.0247612	0.0247612	0.0888121	-0.1133	-0.7723	-0.7723	-0.7723	-0.7723	-1.4016	BRD-A47364545	SK&F-10047-(+)
CTSB	HT29	0.00316627	0.996452	0.363105	0.363105	0.264376	-0.19715	0.41625	0.0341	0.0341	0.0341	0.2788	BRD-K64857848	XMD-885
CTSB	MCF7	0.0031703	0.0832604	0.174026	0.174026	0.00806034	-0.2102	-0.8818	-2.0201	-0.4255	-0.4255	-1.954	BRD-K34341643	glasdegib
CTSB	A375	0.00317903	0.119784	0.00759903	0.00759903	0.360817	-0.1133	-0.60995	-0.6524	-0.6524	-0.6524	-0.5675	BRD-K96720755	relcovaptan
CTSB	MCF7	0.0031854	0.229683	0.0601385	0.0601385	0.0670547	-0.2102	-0.7532	-0.6326	-0.6326	-0.6326	-1.4948	BRD-A75172220	hydrocortisone
CTSB	A375	0.0031893	0.740844	0.284613	0.284613	0.523505	-0.1133	0.49265	-0.0971	-0.0755	-0.0755	0.485	BRD-K59037100	oxybenzone
CTSB	HT29	0.00322443	0.27336	0.477123	0.477123	0.176762	-0.19715	0.46	0.5011	-0.0341	-0.0341	0.4189	BRD-K36862742	hydroflumethiazide
CTSB	A549	0.00323152	0.10384	0.52577	0.52577	0.291952	0	0.3414	0.4923	0	0	0.32795	BRD-K71035033	masitinib
CTSB	HT29	0.00323426	0.230869	0.0213189	0.0213189	0.190604	-0.19715	-0.8265	-0.4435	-0.8265	-0.8265	-0.7463	BRD-K31092604	donitriptan
CTSB	MCF7	0.00324646	0.0937103	0.0015451	0.0015451	0.0641474	-0.2102	0.344	0.7742	0.7742	0.7742	0.3483	BRD-K37561857	zardaverine
CTSB	MCF7	0.00324646	0.0187266	0.0343959	0.0343959	0.821567	-0.2102	-0.8293	-1.5281	-0.9749	-0.9749	-0.4966	BRD-K83720053	avagacestat
CTSB	A375	0.00326824	0.22788	0.029226	0.029226	0.16009	-0.1133	0.36835	0.5487	0.4023	0.4023	1.1836	BRD-K18895904	olanzapine
CTSB	A375	0.00327254	0.853063	0.263552	0.263552	0.0657155	-0.1133	-0.7161	0.1304	-0.6275	-0.6275	-0.8086	BRD-K03406345	azacitidine
CTSB	HT29	0.00327776	0.503198	0.248211	0.248211	0.0224242	-0.19715	0.6745	0.4667	0.0808	0.0808	1.0665	BRD-K52618540	inositol
CTSB	HA1E	0.00327881	0.369353	0.00633287	0.00633287	0.504879	-0.0725	-0.9099	-0.5397	-0.9099	-0.9099	-1.2443	BRD-U70626184	BI-2536
CTSB	HA1E	0.00328057	0.0856142	0.00536826	0.00536826	0.0634803	-0.0725	-0.94635	-1.9401	-1.0543	-1.0543	-2.0917	BRD-K35189033	levonorgestrel
CTSB	A375	0.00328299	0.201297	0.0439157	0.0439157	0.0489834	-0.1133	0.57095	0.3431	0.3431	0.3431	1.2612	BRD-K07220430	cinnarizine
CTSB	HEPG2	0.00328334	0.493031	0.457993	0.457993	0.0312981	-0.2475	0.3222	-0.3634	-0.1776	-0.1776	0.6102	BRD-K50140147	NVP-TAE684
CTSB	PC3	0.00328435	0.651431	0.137884	0.137884	0.203954	-0.0636	0.406	-0.5595	0.381	0.381	0.5143	BRD-K75699339	rizatriptan
CTSB	MCF7	0.00329491	0.0241142	0.000308645	0.000308645	0.857528	-0.2102	0.3377	0.8921	0.7618	0.7618	-0.0871	BRD-K82603084	ethylenediaminetetraacetic-acid
CTSB	A375	0.00331277	0.698332	0.235244	0.235244	0.0916984	-0.1133	-0.48	-0.263	-0.33	-0.33	-5.5518	BRD-K88573743	A-443654
CTSB	HT29	0.00336323	0.205581	0.112818	0.112818	0.755599	-0.19715	0.40425	0.1739	0.1739	0.1739	-0.2155	BRD-K17894950	indirubin
CTSB	A375	0.00336846	0.21949	0.0188923	0.0188923	0.0933127	-0.1133	0.3317	0.1888	0.2544	0.2544	0.8136	BRD-K51333959	siramesine
CTSB	A549	0.00337743	0.104564	0.289851	0.289851	0.417759	0	0.5011	0.53515	0.4086	0.4086	-0.3696	BRD-A50737080	CGK-733
CTSB	PC3	0.00338501	0.183243	0.019462	0.019462	0.414161	-0.0636	-0.8458	-1.3922	-1.3922	-1.3922	-0.6926	BRD-K12343256	trametinib
CTSB	PC3	0.00339124	0.00113254	0.000621607	0.000621607	0.0814631	-0.0636	0.4348	1.0555	0.7056	0.7056	0.3364	BRD-K92428232	GSK-461364
CTSB	HA1E	0.00340342	0.605342	0.107075	0.107075	0.835865	-0.0725	-0.85485	0.0809	-0.2865	-0.2865	0.1188	BRD-K76841105	tazarotene
CTSB	MCF7	0.00340511	0.521184	0.033446	0.033446	0.266002	-0.2102	-0.7084	-0.49705	-0.83565	-0.83565	-0.5418	BRD-K88052444	urea
CTSB	A375	0.00341856	0.515562	0.0211985	0.0211985	0.288334	-0.1133	-0.7892	0	-0.8141	-0.8141	-0.4709	BRD-K70330367	amantadine
CTSB	HT29	0.00342026	0.32091	0.00398128	0.00398128	0.16101	-0.19715	0.3179	0.0864	0.4589	0.4589	0.3534	BRD-A03216249	mepivacaine
CTSB	A375	0.0034208	0.170388	0.0211828	0.0211828	0.108457	-0.1133	-0.6905	-0.6487	-0.6487	-0.6487	-0.813	BRD-K91495480	AGP-103
CTSB	HA1E	0.00343127	0.1606	0.0141905	0.0141905	0.027643	-0.0725	0.6512	0.7119	0.6512	0.6512	1.54235	BRD-A03216249	mepivacaine
CTSB	HEPG2	0.0034346	0.292948	0.408904	0.408904	0.105019	-0.2475	0.3596	0.4014	-0.22585	-0.22585	0.6365	BRD-K94012289	OSI-027
CTSB	HEPG2	0.00343466	0.164587	0.283873	0.283873	0.755167	-0.2475	0.3432	0.113	0.113	0.113	-0.2403	BRD-A13021932	BMS-509744
CTSB	A375	0.00343601	0.204775	0.207117	0.207117	0.0408864	-0.1133	0.4208	0.4062	0.3092	0.3092	0.6745	BRD-K34888156	theobromine
CTSB	HCC515	0.00344442	0.344544	0.38988	0.38988	0.00701886	-0.4432	0.47885	0.8587	-0.3217	-0.3217	1.0128	BRD-K21718444	KW-2449
CTSB	PC3	0.00345186	0.0872386	0.00160983	0.00160983	0.651071	-0.0636	-0.9486	-0.9486	-1.3095	-1.3095	-0.7489	BRD-K43723251	chenodiol
CTSB	HEPG2	0.0034585	0.117061	0.0657696	0.0657696	0.084862	-0.2475	0.2318	0.5421	0.2899	0.2899	0.1737	BRD-K36363294	I-BET-151
CTSB	A375	0.00346268	0.703416	0.00438905	0.00438905	0.567786	-0.1133	0.3676	0.1503	1.0351	1.0351	-0.6394	BRD-K70610771	VX-222
CTSB	A375	0.00347818	0.0481729	0.0199379	0.00347818	0.0496063	-0.1133	-0.6148	-0.6802	-0.6138	-0.6148	-0.8883	BRD-K74765201	tomelukast
CTSB	HT29	0.00347989	0.305031	0.00145533	0.00145533	0.469786	-0.19715	0.20665	0.541	0.6338	0.6338	0.1023	BRD-K57631554	5-aminolevulinic-acid
CTSB	HA1E	0.00349436	0.118401	0.0278139	0.0278139	0.824736	-0.0725	0.57375	0.8093	0.8093	0.8093	-0.3902	BRD-A50737080	CGK-733
CTSB	PC3	0.00350635	0.570567	0.574845	0.574845	0.803843	-0.0636	0.30195	0.0397	0.105	0.105	0	BRD-K89015388	GSK-923295
CTSB	HT29	0.00351197	0.112634	0.596063	0.596063	0.0188582	-0.19715	0.58545	-0.646	-0.0345	-0.0345	1.077	BRD-A24396574	celastrol
CTSB	MCF7	0.00352635	0.11133	0.0165158	0.0165158	0.0768837	-0.2102	-0.7162	-0.5901	-0.9392	-0.9392	-0.8713	BRD-K28470988	L-690330
CTSB	HT29	0.00354113	0.598067	0.693661	0.693661	0.42222	-0.19715	0.859	0.16925	-0.3776	-0.3776	1.1073	BRD-K86118762	linsitinib
CTSB	HA1E	0.00357604	0.0137742	0.860372	0.860372	0.00658696	-0.0725	1.04335	1.5223	-0.4122	-0.4122	1.63	BRD-K75958547	pitavastatin
CTSB	A549	0.00358457	0.994358	0.107817	0.107817	0.383502	0	0.3842	-0.1437	0.3842	0.3842	0.3452	BRD-K69932463	AZD-8055
CTSB	A375	0.00358886	0.394718	0.273078	0.273078	0.064432	-0.1133	-0.69775	-0.9355	-0.3109	-0.3109	-0.632	BRD-A18043272	phensuximide
CTSB	MCF7	0.00358911	0.649347	0.234222	0.234222	0.0989469	-0.2102	0.5149	0.1875	0.2968	0.2968	0.525	BRD-K17894950	indirubin
CTSB	A375	0.00359299	0.0993937	0.0321469	0.0321469	0.308384	-0.1133	0.3305	0.7163	0.4499	0.4499	0.3531	BRD-K48892307	sasapyrine
CTSB	A375	0.00360501	0.437096	0.0474337	0.0474337	0.23417	-0.1133	0.4566	0.7696	0.4566	0.4566	0.41205	BRD-A80017228	bendroflumethiazide
CTSB	PC3	0.00361533	0.710403	0.0787007	0.0787007	0.261039	-0.0636	-0.78955	0.0927	-0.4972	-0.4972	-0.3137	BRD-K00337317	NU-7441
CTSB	MCF7	0.00361875	0.700419	0.0421357	0.0421357	0.0739208	-0.2102	-0.96865	-0.922	-0.922	-0.922	-0.8269	BRD-A24514565	warfarin
CTSB	HT29	0.00361986	0.175342	0.0597753	0.0597753	0.375155	-0.19715	0.39795	0.786	0.2072	0.2072	0.1746	BRD-A18611368	tazobactam
CTSB	PC3	0.00362004	0.326095	0.0205405	0.0205405	0.626785	-0.0636	0.41985	0.3094	0.3419	0.3419	-0.2576	BRD-U24835547	GSK-1059615
CTSB	A375	0.00362557	0.0213951	0.0392282	0.0392282	0.124038	-0.1133	0.498	0.8526	0.7297	0.7297	0.3797	BRD-A15202882	milnacipran
CTSB	HCC515	0.00364239	0.835054	0.887358	0.887358	0.119661	-0.4432	0.0124	-0.591	-0.45155	-0.45155	0.0124	BRD-K24515980	QL-XI-92
CTSB	HT29	0.00364554	0.0737687	0.38843	0.38843	0.788103	-0.19715	0.50295	0.3789	0.0831	0.0831	0.0226	BRD-K07310275	PF-04691502
CTSB	MCF7	0.00367129	0.613743	0.893767	0.893767	0.00842249	-0.2102	0.6806	0.4571	-0.04945	-0.04945	1.1129	BRD-K19412355	SB-242235
CTSB	HT29	0.00368792	0.410719	0.995228	0.995228	0.079523	-0.19715	0.43875	-0.3342	-0.1847	-0.1847	0.5365	BRD-A58955223	sulforaphane
CTSB	MCF7	0.00368948	0.729031	0.0943741	0.0943741	0.0462848	-0.2102	0.19135	0.168	0.168	0.168	0.9077	BRD-K45033733	famciclovir
CTSB	MCF7	0.00369165	0.421257	0.0169546	0.0169546	0.0828597	-0.2102	-0.7947	-0.2463	-1.1033	-1.1033	-0.7024	BRD-K59013864	AM-24
CTSB	A375	0.00369322	0.609318	0.038086	0.038086	0.300059	-0.1133	-0.7277	-0.1457	-0.8413	-0.8413	-0.5282	BRD-K75699339	rizatriptan
CTSB	A549	0.00372145	0.0407338	0.0347894	0.0347894	0.0443635	0	-0.2426	-0.7893	-0.0797	-0.0797	-0.5252	BRD-K66538826	amuvatinib
CTSB	A549	0.00372276	NA	NA	NA	0.00372276	0	-1.9432	NA	NA	NA	-1.9432	BRD-K11528507	geldanamycin
CTSB	HA1E	0.00372553	0.099325	0.00625993	0.00625993	0.658183	-0.0725	0.66315	0.4426	0.4473	0.4473	-0.6011	BRD-K57252450	cilengitide
CTSB	MCF7	0.0037278	0.0037278	NA	0.0037278	0.0037278	-0.2102	1.6356	1.6356	NA	1.6356	1.6356	BRD-A13254067	okadaic acid
CTSB	A375	0.00372868	0.0158369	0.00393988	0.00393988	0.11195	-0.1133	-0.55245	-1.4171	-0.7671	-0.7671	-0.5945	BRD-K91336023	mesulergine
CTSB	A375	0.00374293	0.0770873	0.021278	0.021278	0.155335	-0.1133	0.2451	0.6224	0.4151	0.4151	0.269	BRD-A51078674	diclofensine
CTSB	HT29	0.00377162	0.70179	0.175074	0.175074	0.221395	-0.19715	0.4281	0.218	0.349	0.349	0.6091	BRD-A69815203	cyclosporin-a
CTSB	MCF7	0.00377249	0.0819043	0.00967695	0.00967695	0.0083667	-0.2102	0.3028	0.786	0.1995	0.1995	0.9829	BRD-K51143828	lurasidone
CTSB	A375	0.00378593	0.0318865	0.0159387	0.00378593	0.0868088	-0.1133	-0.762	-1.2349	-0.7368	-0.762	-1.4165	BRD-K93944989	safingol
CTSB	HT29	0.00379585	0.605641	0.123125	0.123125	0.161158	-0.19715	0.745	0.6968	0.6968	0.6968	0.8099	BRD-K12885236	dapivirine
CTSB	PC3	0.00381781	0.237043	0.0244267	0.0244267	0.478544	-0.0636	0.6116	0.2156	0.5907	0.5907	-0.8901	BRD-K28456624	seocalcitol
CTSB	HT29	0.00382511	0.553919	0.16445	0.16445	0.19161	-0.19715	0.4771	0.3534	0.3534	0.3534	0.6936	BRD-K00521308	ATN-161
CTSB	A375	0.00382705	0.170693	0.048101	0.048101	0.817867	-0.1133	0.4032	0.6745	0.4273	0.4273	-0.0975	BRD-K26603252	PD-153035
CTSB	A549	0.00386471	0.0413612	0.0637739	0.0637739	0.213338	0	-0.72905	-0.8077	-0.4079	-0.4079	0.6869	BRD-K20285085	fostamatinib
CTSB	MCF7	0.0038775	0.221566	0.518272	0.518272	0.0475846	-0.2102	0.226	0.1626	-0.175	-0.175	0.7556	BRD-K06900071	tebipenem
CTSB	HT29	0.00389384	0.152998	0.147093	0.147093	0.0466468	-0.19715	-0.8711	-1.6421	-0.5511	-0.5511	-3.15745	BRD-K59875992	FPL-62064
CTSB	HEPG2	0.00390073	0.349531	0.910505	0.910505	0.00724152	-0.2475	0.2611	-0.0981	-0.312	-0.312	0.8405	BRD-K49669041	BX-912
CTSB	PC3	0.00390518	0.612332	0.0526523	0.0526523	0.053355	-0.0636	0.37935	-0.019	0.3773	0.3773	1.0502	BRD-K54416256	methimazole
CTSB	HA1E	0.00390793	0.0628514	0.00589758	0.00589758	0.57411	-0.0725	0.37825	0.6239	0.4063	0.4063	0.2036	BRD-A26032986	zaldaride
CTSB	PC3	0.00395081	0.122049	0.0328463	0.0328463	0.540078	-0.0636	-0.9125	-1.2125	-1.2125	-1.2125	-0.4547	BRD-K70463136	BAY-87-2243
CTSB	MCF7	0.00395513	0.343063	0.380795	0.380795	0.505849	-0.2102	0.4102	-0.1477	-0.0497	-0.0497	0.3547	BRD-A23067620	itraconazole
CTSB	PC3	0.00395591	0.301845	0.182803	0.182803	0.120728	-0.0636	0.48725	0.5025	0.472	0.472	0.8365	BRD-A75726477	clenbuterol
CTSB	HT29	0.00395681	0.430093	0.500912	0.500912	0.0292324	-0.19715	0.50955	0.0475	0.0475	0.0475	0.8045	BRD-K43723251	chenodiol
CTSB	HA1E	0.00396043	0.551198	0.515336	0.515336	0.626112	-0.0725	0.51635	-0.1786	0.0544	0.0544	0.2848	BRD-A58955223	sulforaphane
CTSB	A375	0.00397275	0.0611779	0.015023	0.015023	0.0824784	-0.1133	-0.64225	-1.0238	-1.0238	-1.0238	-1.2088	BRD-K53814070	ripasudil
CTSB	HA1E	0.00397303	0.393739	0.214099	0.214099	0.0158261	-0.0725	0.6379	0.3483	0.4066	0.4066	1.0662	BRD-K51324732	meglitinide
CTSB	MCF7	0.00397591	0.262913	0.000836809	0.000836809	0.213822	-0.2102	-1.01895	-3.6217	-1.6859	-1.6859	-0.9464	BRD-K61691541	PF-03084014
CTSB	MCF7	0.00398054	0.197666	0.0885811	0.0885811	0.0223085	-0.2102	-0.765	-0.7242	-0.7242	-0.7242	-1.1038	BRD-K19939891	TIC10
CTSB	A375	0.00398275	0.239029	0.0659285	0.0659285	0.0921709	-0.1133	0.3016	0.3016	0.3016	0.3016	0.5304	BRD-K07208025	trimethoprim
CTSB	A375	0.00398281	1	0.403403	0.403403	0.129645	-0.1133	0.75515	-0.0975	-0.054	-0.054	1.0392	BRD-A26711594	nicardipine
CTSB	HCC515	0.00398981	0.637467	0.317563	0.317563	0.0632295	-0.4432	0.20815	-0.2338	-0.138	-0.138	0.1732	BRD-K73368362	BIX-02189
CTSB	HEPG2	0.00399512	0.308282	0.0877157	0.0877157	0.199745	-0.2475	0.49905	0.0807	0.0807	0.0807	-0.8013	BRD-K59317601	MLN-0128
CTSB	HT29	0.0040185	0.126717	0.270829	0.270829	0.547321	-0.19715	0.3775	0.3049	0.21045	0.21045	0.3668	BRD-K95142244	talazoparib
CTSB	HA1E	0.00402378	0.290246	0.0759143	0.0759143	0.655338	-0.0725	0.6004	0.1548	0.3529	0.3529	-0.1278	BRD-A20348246	chlormezanone
CTSB	HA1E	0.00403655	0.0704416	0.00323919	0.00323919	0.0167463	-0.0725	-1.15345	-2.4935	-1.4325	-1.4325	-2.3605	BRD-K17203476	LY-2874455
CTSB	MCF7	0.0040579	0.832002	0.80262	0.80262	0.427326	-0.2102	0.2001	-0.36	-0.2423	-0.2423	0.05965	BRD-K50168500	canertinib
CTSB	MCF7	0.00407183	0.64481	0.258806	0.258806	0.725983	-0.2102	0.55795	0.2027	0.2027	0.2027	0.5369	BRD-K55748775	SCH-28080
CTSB	HA1E	0.0040751	0.763651	0.702764	0.702764	0.0228701	-0.0725	0.2787	0.1345	0.0962	0.0962	0.8108	BRD-K01824921	DPCPX
CTSB	HT29	0.00407703	0.0656346	0.0141684	0.0141684	0.535544	-0.19715	0.34425	1.1325	0.5067	0.5067	0.2349	BRD-K63504947	semaxanib
CTSB	HA1E	0.00407861	0.214007	0.827491	0.827491	0.314223	-0.0725	0.727	0.2488	-0.15605	-0.15605	1.2841	BRD-K63343048	orlistat
CTSB	A375	0.00408466	0.447867	0.0741767	0.0741767	0.542821	-0.1133	0.4238	0.5176	0.5176	0.5176	0.33	BRD-K11196887	norfloxacin
CTSB	PC3	0.00409	0.169344	0.371675	0.371675	0.944822	-0.0636	-0.7963	-0.89205	-0.1749	-0.1749	0.1603	BRD-K66538826	amuvatinib
CTSB	PC3	0.00410117	0.0607837	0.0280373	0.0280373	0.023155	-0.0636	0.718	1.3451	0.8179	0.8179	0.9758	BRD-K25943794	blonanserin
CTSB	A375	0.00410532	0.0184821	0.000904986	0.000904986	0.856908	-0.1133	-0.7423	-1.3436	-0.9281	-0.9281	-0.1126	BRD-K46839850	cinepazide
CTSB	HEPG2	0.00410552	0.183299	0.23396	0.23396	0.0254891	-0.2475	0.23245	0.0946	-0.1357	-0.1357	0.7045	BRD-K43002773	GDC-0068
CTSB	MCF7	0.00413615	0.059493	0.125058	0.125058	0.0750208	-0.2102	0.3915	0.5166	0.3171	0.3171	0.4659	BRD-A87983072	benzotript
CTSB	PC3	0.00415154	0.225361	0.00436162	0.00436162	0.491669	-0.0636	-0.59425	-2.441	-1.2312	-1.2312	-0.3501	BRD-K78790801	KIN001-269
CTSB	A375	0.00418002	0.220226	0.199617	0.199617	0.417132	-0.1133	0.4979	0.753	0.3761	0.3761	0	BRD-A18917088	estradiol
CTSB	MCF7	0.00418438	0.587077	0.111236	0.111236	0.0250637	-0.2102	0.30695	-0.402	0.2052	0.2052	0.5997	BRD-A24228527	ofloxacin
CTSB	MCF7	0.00418438	0.472702	0.316196	0.316196	0.37568	-0.2102	-0.8468	-0.2461	-0.0323	-0.0323	-1.0061	BRD-K96550715	linagliptin
CTSB	PC3	0.0041913	0.0166479	0.0997928	0.0997928	0.0190684	-0.0636	-2.1537	-3.0529	-1.17465	-1.17465	-2.4879	BRD-K87156652	carbimazole
CTSB	HT29	0.00419305	0.355274	0.0540655	0.0540655	0.350664	-0.19715	0.1917	-0.1232	0.1373	0.1373	0.1917	BRD-K43578482	defactinib
CTSB	MCF7	0.00421356	0.250803	0.722594	0.722594	0.0131075	-0.2102	0.60585	0.8019	-0.3021	-0.3021	1.2153	BRD-K29950728	clomifene
CTSB	HEPG2	0.00421868	0.0598697	0.00235803	0.00235803	0.577896	-0.2475	0.28195	0.2953	0.3342	0.3342	-0.24	BRD-K55591206	epigallocatechin-gallate-(-)
CTSB	A549	0.00422581	0.722365	0.238447	0.238447	0.299641	0	-0.39295	0.11625	-0.1913	-0.1913	-0.37635	BRD-K56277358	MGCD-265
CTSB	A375	0.00422852	0.0252705	0.0791598	0.0791598	0.165253	-0.1133	-0.68305	-1.0298	-0.6745	-0.6745	-0.7882	BRD-K42981054	mibampator
CTSB	A375	0.00422918	0.0270509	0.374639	0.374639	0.0146835	-0.1133	-0.6745	-1.3983	-0.5653	-0.5653	-1.085	BRD-K70642949	GSK-2334470
CTSB	HA1E	0.00423003	0.0460337	0.000504594	0.000504594	0.0723742	-0.0725	0.57635	0.7225	0.7225	0.7225	0.5322	BRD-A26095496	clobetasol
CTSB	HA1E	0.00427295	0.120857	0.0359761	0.0359761	0.630653	-0.0725	-0.56585	-0.919	-0.6863	-0.6863	0.0418	BRD-A45540146	KI-20227
CTSB	PC3	0.00427583	0.134848	0.000185417	0.000185417	0.409321	-0.0636	0.6366	0.8601	0.9525	0.9525	0.2281	BRD-K99616396	motesanib
CTSB	MCF7	0.00429726	0.284251	0.0734871	0.0734871	0.0561019	-0.2102	-0.864	-0.8701	-0.9643	-0.9643	-0.8579	BRD-A25234499	aminoglutethimide
CTSB	MCF7	0.00430044	0.0716893	0.0681493	0.0681493	0.957552	-0.2102	0.2622	0.773	0.2497	0.2497	0.0395	BRD-A87435144	AZD-7545
CTSB	HEPG2	0.00431949	0.848633	0.455852	0.455852	0.164587	-0.2475	0.6733	-0.5537	-0.08	-0.08	0.7441	BRD-K93788137	PF-431396
CTSB	MCF7	0.00432715	0.743312	0.117378	0.117378	0.0763583	-0.2102	-0.82815	-0.3789	-0.6264	-0.6264	-0.8874	BRD-K24968862	SB-683698
CTSB	HA1E	0.00435175	0.903641	0.615947	0.615947	0.0195873	-0.0725	0.4648	0	0	0	0.789	BRD-A25234499	aminoglutethimide
CTSB	A549	0.00435476	NA	NA	NA	NA	0	-1.7112	NA	NA	NA	NA	BRD-A35108200	dexamethasone
CTSB	HCC515	0.00436557	0.229067	0.125674	0.125674	0.148007	-0.4432	-0.046	0.8687	-0.123	-0.123	-0.0626	BRD-K24050847	KIN001-270
CTSB	HCC515	0.00436558	0.0609287	0.0878004	0.0878004	0.418954	-0.4432	-0.0822	0.5612	-0.0261	-0.0261	-0.1088	BRD-K11267252	alectinib
CTSB	HT29	0.00437422	0.15149	0.017675	0.017675	0.920109	-0.19715	0.8987	0.962	0.8354	0.8354	-0.5455	BRD-K31111078	dimethyl-fumarate
CTSB	MCF7	0.00440329	0.0451862	0.06504	0.06504	0.00125593	-0.2102	0.2349	0.52895	0.0428	0.0428	0.8577	BRD-U51024685	HG-6-64-01
CTSB	PC3	0.00442886	0.382355	0.554978	0.554978	0.0308561	-0.0636	0.587	-0.3479	-0.0257	-0.0257	0.8166	BRD-K80608265	erteberel
CTSB	HA1E	0.00443188	0.0203469	0.0892376	0.0892376	0.0387867	-0.0725	-0.70835	-1.2534	-0.866	-0.866	-1.0572	BRD-K45542189	diethylcarbamazine
CTSB	PC3	0.00444306	0.914831	0.151526	0.151526	0.631397	-0.0636	-1.57245	0.4094	-0.0563	-0.0563	0.0674	BRD-K13094524	PFI-1
CTSB	HA1E	0.00444862	0.0145095	0.0193249	0.0193249	0.0300601	-0.0725	0.48225	1.0074	0.7769	0.7769	1.6107	BRD-K83186168	AZD-1981
CTSB	HT29	0.00445765	0.0376124	0.00737413	0.00737413	0.677765	-0.19715	-0.9482	-0.9509	-0.94955	-0.94955	0.178	BRD-A97479839	piperidolate
CTSB	HT29	0.00446347	0.187112	0.0663125	0.0663125	0.113533	-0.19715	0.31	0.2474	0.1995	0.1995	0.4509	BRD-K62310379	fluticasone-propionate
CTSB	MCF7	0.00449757	0.191613	0.00789324	0.00789324	0.478562	-0.2102	0.32125	0.5489	0.454	0.454	0.3594	BRD-K33251802	miglustat
CTSB	MCF7	0.00450274	0.978769	0.296524	0.296524	0.489833	-0.2102	0.31785	0.1817	0.0921	0.0921	0.3993	BRD-K59227464	LY-2228820
CTSB	HA1E	0.00450767	0.241691	0.104323	0.104323	0.398945	-0.0725	-0.5307	-0.5874	-0.474	-0.474	-0.273	BRD-K52959329	mitiglinide
CTSB	MCF7	0.00451312	0.640609	0.0198222	0.0198222	0.272453	-0.2102	0.1699	-0.0211	0.1773	0.1773	0.1625	BRD-K12219985	glipizide
CTSB	HT29	0.00454292	0.428074	0.00971828	0.00971828	0.689011	-0.19715	-0.6639	-0.4375	-0.8547	-0.8547	0.0477	BRD-K31495718	AZD-7687
CTSB	A549	0.00454371	0.984487	0.49703	0.49703	0.0551209	0	-0.224	0.1726	-0.201	-0.201	-0.773	BRD-K56343971	vemurafenib
CTSB	HEPG2	0.00454461	0.144372	0.72208	0.72208	0.0112451	-0.2475	0.2819	0.3789	-0.2013	-0.2013	0.9905	BRD-K12502280	TG-101348
CTSB	HT29	0.00455112	0.791527	0.133605	0.133605	0.0814915	-0.19715	-0.801	-0.1303	-0.73175	-0.73175	-0.9443	BRD-K02637541	celecoxib
CTSB	MCF7	0.00455446	0.148331	0.0364214	0.0364214	0.441832	-0.2102	0.12175	0.38275	0.22255	0.22255	0	BRD-K24496482	SB-590885
CTSB	HT29	0.00456709	0.256696	0.0365639	0.0365639	0.0209454	-0.19715	0.106	-0.0077	0.19005	0.19005	1.75255	BRD-K67868012	PI-103
CTSB	HT29	0.00456884	0.0425435	0.0209841	0.0209841	0.254772	-0.19715	0.4152	0.723	0.4427	0.4427	0.1273	BRD-K43887077	dopamine
CTSB	HEPG2	0.00457535	0.42308	0.213459	0.213459	0.00636154	-0.2475	0.37735	-0.1694	0.2547	0.2547	0.8243	BRD-K53281329	SYK-inhibitor
CTSB	A375	0.00457577	0.699058	0.333024	0.333024	0.0146636	-0.1133	-1.0266	0.0488	-0.1119	-0.1119	-1.0947	BRD-K97158071	droperidol
CTSB	A375	0.00457862	0.592272	0.121564	0.121564	0.0480899	-0.1133	-0.70835	0.0428	-0.3666	-0.3666	-0.7786	BRD-K92968657	tirapazamine
CTSB	MCF7	0.00458109	0.013734	0.0775055	0.0775055	0.0926551	-0.2102	-0.94615	-1.4513	-0.9838	-0.9838	-0.9085	BRD-A90799790	isradipine
CTSB	HT29	0.00458312	0.930313	0.465203	0.465203	0.113758	-0.19715	0.6161	-0.176	-0.176	-0.176	0.9523	BRD-K00911143	brexpiprazole
CTSB	A375	0.00461584	0.00324219	5.16879e-05	5.16879e-05	0.00324219	-0.1133	-1.98035	-4.6198	-2.4964	-2.4964	-3.8985	BRD-A27376179	lestaurtinib
CTSB	HA1E	0.00462212	0.0115017	0.00233279	0.00233279	0.148767	-0.0725	0.5069	1.165	0.9516	0.9516	0.2554	BRD-K97101532	VX-661
CTSB	PC3	0.0046544	0.0654632	0.0403246	0.0403246	0.125834	-0.0636	-0.5995	-0.8749	-0.6745	-0.6745	-1.0233	BRD-A07563059	bopindolol
CTSB	HCC515	0.00466017	0.469494	0.493911	0.493911	0.469494	-0.4432	0.1491	-0.2454	-0.2454	-0.2454	-0.3677	BRD-K99616396	motesanib
CTSB	HA1E	0.004673	0.356913	0.0878047	0.0878047	0.402531	-0.0725	0.8682	0.0533	0.2595	0.2595	0.5322	BRD-K02950022	BMS-299897
CTSB	PC3	0.00470193	0.122049	0.0152503	0.0152503	0.142167	-0.0636	-0.5857	-0.5235	-0.6086	-0.6086	-0.842	BRD-K01663662	diphenidol
CTSB	A375	0.00470284	0.632843	0.141256	0.141256	0.0561411	-0.1133	0.2651	0.1787	0.1787	0.1787	0.8795	BRD-K48722258	dilazep
CTSB	MCF7	0.0047063	0.412714	0.0270286	0.0270286	0.129972	-0.2102	-0.77745	-0.7409	-1.1838	-1.1838	-0.9993	BRD-K20079257	rufinamide
CTSB	MCF7	0.0047144	0.00625928	0.853708	0.853708	0.00468176	-0.2102	0.84695	-2.1483	0.255	0.255	1.5488	BRD-K75649340	tioguanine
CTSB	HCC515	0.00472443	0.777792	0.702998	0.702998	0.202663	-0.4432	0.17535	-0.836	-0.3536	-0.3536	-0.1699	BRD-K45746021	CC-401
CTSB	MCF7	0.00474735	0.150952	0.119944	0.119944	0.10184	-0.2102	0.166	0.1532	0.1326	0.1326	0.1897	BRD-K66989831	anacardic-acid
CTSB	MCF7	0.00476052	0.219696	0.19662	0.19662	0.568888	-0.2102	0.17755	0.2957	0.1547	0.1547	-0.0557	BRD-A87479750	tenidap
CTSB	HT29	0.00477402	0.922463	0.487242	0.487242	0.0568261	-0.19715	0.6167	-0.0536	0.1059	0.1059	0.5842	BRD-K50000283	PHA-767491
CTSB	HCC515	0.0047895	0.282825	0.158836	0.158836	0.268349	-0.4432	-0.0162	0.1047	-0.0986	-0.0986	-0.0658	BRD-K68756823	FR-180204
CTSB	A375	0.00479421	0.538606	0.421368	0.421368	0.267719	-0.1133	0.3664	0.2598	0.1299	0.1299	0.3791	BRD-K31135544	IB-MECA
CTSB	HT29	0.00484251	0.687556	0.139153	0.139153	0.151772	-0.19715	-0.6072	-0.365	-0.3679	-0.3679	-0.6745	BRD-A05523972	telmesteine
CTSB	HEPG2	0.00484428	0.967835	0.0730916	0.0730916	0.394123	-0.2475	0.2694	-0.3302	0.2204	0.2204	-0.5625	BRD-K72414522	AZD-5438
CTSB	HA1E	0.00484985	0.0164566	0.0069381	0.0069381	0.0744299	-0.0725	0.488	1.0413	0.9254	0.9254	0.5554	BRD-K79989959	nesbuvir
CTSB	PC3	0.00485331	0.513322	0.0490004	0.0490004	0.112013	-0.0636	-0.67375	0.0365	-0.6702	-0.6702	-0.8415	BRD-K33483813	actarit
CTSB	HA1E	0.00485355	0.104162	0.0564677	0.0564677	0.218578	-0.0725	-0.4958	-0.6521	-0.5127	-0.5127	-0.4958	BRD-K02637541	celecoxib
CTSB	MCF7	0.00486787	0.0446781	0.197071	0.197071	0.323902	-0.2102	0.36765	0.7016	0.0181	0.0181	0.4038	BRD-K06878038	deferiprone
CTSB	HA1E	0.00488626	0.0229587	0.035279	0.035279	0.36078	-0.0725	0.635	0.9318	0.7346	0.7346	-0.6651	BRD-K57371763	fidaxomicin
CTSB	PC3	0.00491509	0.34337	0.068726	0.068726	0.454685	-0.0636	-0.9313	-0.4369	-0.4529	-0.4529	-0.9536	BRD-K04833372	GSK-1904529A
CTSB	MCF7	0.00491535	0.0433053	0.00377801	0.00377801	0.045015	-0.2102	0.44495	0.4308	0.4308	0.4308	0.5175	BRD-A15909516	rebamipide
CTSB	A375	0.00493102	0.699989	0.187642	0.187642	0.500483	-0.1133	0.2915	-0.1426	0.07775	0.07775	0.33355	BRD-K19477839	SGX523
CTSB	A549	0.00494155	0.919566	0.0664178	0.0664178	0.587622	0	-0.39255	-0.08805	-0.28325	-0.28325	0.34445	BRD-K53281329	SYK-inhibitor
CTSB	MCF7	0.00495363	0.104859	0.798356	0.798356	0.012448	-0.2102	0.29295	0.1438	-0.29075	-0.29075	0.40835	BRD-U61997977	WZ-4-145
CTSB	A375	0.00495777	0.350862	0.153481	0.153481	0.665981	-0.1133	0.4033	0.3633	0.3633	0.3633	-0.055	BRD-K59227464	LY-2228820
CTSB	MCF7	0.00496392	0.0214095	0.405805	0.405805	0.00615725	-0.2102	0.33285	0.5649	0.1123	0.1123	0.5215	BRD-K04833372	GSK-1904529A
CTSB	HA1E	0.00496905	0.582521	0.753038	0.753038	0.103221	-0.0725	-0.4168	-0.3921	-0.1472	-0.1472	-0.9137	BRD-K94176593	TWS-119
CTSB	HA1E	0.00498451	0.0132538	0.00158241	0.00158241	0.383718	-0.0725	0.36735	1.0511	0.849	0.849	0.2601	BRD-A12994259	pomalidomide
CTSB	MCF7	0.00499397	0.97737	0.750801	0.750801	0.329889	-0.2102	0.0644	-0.0963	-0.0963	-0.0963	-0.45085	BRD-K99749624	linifanib
CTSB	HT29	0.00500051	0.0859074	0.0118499	0.0118499	0.172371	-0.19715	0.216	0.5716	0.3938	0.3938	0.1817	BRD-K57252450	cilengitide
CTSB	HA1E	0.00500189	0.0795248	0.0178878	0.0178878	0.550869	-0.0725	-0.5168	-1.3937	-0.5832	-0.5832	-0.4847	BRD-K06902185	minoxidil
CTSB	HT29	0.00500946	0.0869044	0.770324	0.770324	0.009181	-0.19715	0.2868	0.7262	0.0305	0.0305	1.5459	BRD-A61154809	gliclazide
CTSB	A375	0.00506935	0.740474	0.318836	0.318836	0.0924553	-0.1133	0.5726	0.3981	0.3981	0.3981	0.7403	BRD-K00603606	ticlopidine
CTSB	HT29	0.00508179	0.0416443	0.0305845	0.0305845	0.406237	-0.19715	0.5724	1.084	1.017	1.017	0.3655	BRD-K92241597	tosedostat
[truncated: 7,725 more rows]
