# Supplementary material for: Transcriptional Inhibition of Host Viral Entry Proteins as a Therapeutic Strategy for SARS-CoV-2
Source: Preprints.org preprint supplement (doi:10.20944/preprints202003.0360.v1), 2020-03-24
Supplement: Supplementary file 2 [file Supplementary_Table_1_TMPRSS2_modulators.xlsx]

## Sheet: Transcriptional modulators
SRP ID (see tab 2 for sample assignments)	Manual annotation string (estrogen and androgen-related compounds in bold)	baseMean	log2(FC), negative = down-regulation in treatment	lfcSE	stat	raw p-value	adjusted p-value (within study)	Number genes tested by DESeq	Number of genes with raw p<0.05 and up-regulation	Number of genes with raw p<0.05 and down-regulation	TMPRSS2 rank out of all genes, by p-value
2017_SRP061634	TGFbeta and EGF treatment in HeLa	1809.35	-8.43915	0.394315	21.4021	1.27854e-101	1.69364e-98	15922	1945	2606	12
2326_SRP051102	MDV3100 treatment vs. DHT treatment (control)	12041.4	-3.82746	0.101505	37.707	0	0	15858	3802	3236	1.5
1711_SRP059511	treatment,Enzalutamide-Treated V16D cells	3626.17	-2.48237	0.0408259	60.8038	0	0	14334	1473	1900	15.5
1706_SRP055809	treatment,DAPT H1 hESC	215.532	-2.10558	0.194318	10.8357	2.33159e-27	2.86607e-25	15983	1997	2030	130
1444_SRP102725	treatment,combination of chaetocin(30nM)+MLN3237(90nM)	267.262	-2.02084	0.209954	9.62516	6.26107e-22	5.48577e-20	14756	3512	3537	168.5
982_SRP090830	ASCL1 k/o	2282.72	-2.01482	0.0996655	20.2158	7.10959e-91	3.54439e-89	14308	4669	4498	287
654_SRP070657	treated with,10nM E2 for 24hr	336.509	-1.96426	0.144269	13.6153	3.24782e-42	1.90773e-40	14397	2997	2846	245
1443_SRP102725	treatment,chaetocin (30nM)	275.848	-1.82773	0.205826	8.88001	6.6856e-19	2.74205e-17	14318	2888	3150	349
2601_SRP049355	E2 treatment	438.736	-1.81089	0.357977	5.05868	4.22179e-07	3.60741e-05	16665	538	456	161
1576_SRP065559	ReACp53 treatment OVCAR3	398.151	-1.62209	0.160765	10.0898	6.12958e-24	2.64991e-21	15136	1539	1851	35
199_SRP075959	TITLE,PANC1 cells, Cobalt chloride and Acriflavine	1717.64	-1.59225	0.12823	12.4172	2.10866e-35	1.32143e-33	13913	4053	4015	222
1565_SRP051765	drug treatment,crizotinib_48h_300nM in H3122 cells	275.867	-1.57986	0.203143	7.77708	7.4215e-15	1.67771e-13	14920	3225	2753	660
148_SRP108867	M4 in tumor (not sure what M4 is)	534.335	-1.47411	0.209898	7.023	2.17151e-12	1.08839e-10	14517	1190	1658	288
2393_SRP098916	treatment,Doxycycline + E2	332.548	-1.26992	0.119118	10.661	1.5497e-26	3.30448e-25	14246	3542	3458	668
648_SRP070657	treated with,10nM E2 for 8hr	339.881	-1.22044	0.143587	8.49965	1.90165e-17	4.16319e-16	14258	2791	2506	651
649_SRP070657	treated with,10nM E2 for 6hr	341.584	-1.20563	0.156519	7.70276	1.33162e-14	2.9136e-13	14246	2623	2259	651
656_SRP070657	treated with,10nM E2 for 12hr	363.05	-1.14761	0.15544	7.38296	1.54812e-13	3.26564e-12	14329	2512	2223	679
650_SRP070657	treated with,10nM E2 for 5hr	390.276	-1.08162	0.132618	8.15592	3.46542e-16	6.35385e-15	14397	3059	2807	785
198_SRP075959	TITLE,PANC1 cells, Cobalt chloride	1812.79	-1.06707	0.189722	5.6244	1.86155e-08	7.76954e-07	13485	1024	867	323.5
2394_SRP098916	treatment,E2	340.516	-1.05057	0.118857	8.83888	9.66826e-19	2.19771e-17	14210	2765	2526	625
1248_ERP016636	treatment,IOX2	444.381	-1.02989	0.14031	7.34006	2.13495e-13	4.12696e-12	15793	2538	2449	817
2537_SRP095329	Liposarcoma SPIN1 k/d	150.684	-1.02708	0.160689	6.39172	1.64027e-10	7.04822e-09	15207	1117	1213	299
297_SRP075592	MDA-MB-468, EGF, 7 d treatment	7347.7	-0.965377	0.106487	9.06566	1.23857e-19	3.15524e-18	16697	3253	3053	655
2392_SRP098916	treatment,Doxycycline	338.144	-0.958316	0.133319	7.18812	6.56914e-13	3.44553e-11	14218	1190	1129	271
2254_SRP064391	treatment, 1 uM AZD6422 and 1 uM PaPE	865.066	-0.895586	0.172013	5.2065	1.92431e-07	7.53802e-06	13398	1410	1417	342
1993_SRP013389	T47D cellstreatment,8 hour 100 nM genistein	371.692	-0.839683	0.194795	4.31059	1.62816e-05	0.00205295	16770	165	58	133
1209_SRP076054	TSA 24h @ 100 ng/ml	658.036	-0.808125	0.0750449	10.7686	4.84565e-27	8.5972e-26	14592	4914	4603	822
1874_SRP081918	treatment,STAT3 pooled siRNA	3081.44	-0.783031	0.173304	4.51826	6.23511e-06	9.21654e-05	13880	1536	1559	939
785_SRP031476	MCF7 treatment,10nM E2 treatment for 24h	3954.24	-0.717012	0.0487344	14.7127	5.34711e-49	4.81083e-47	15296	3278	3342	170
1577_SRP065559	ReACp53 treatment ovarian cancer	1138.09	-0.711075	0.0697743	10.1911	2.17335e-24	1.05545e-22	15356	2615	2796	316
1846_SRP117243	treatment,CSDE1 shRNA in H9 ESC	574.185	-0.602029	0.0887745	6.78155	1.18889e-11	2.57848e-10	16560	3218	3150	763
1421_SRP078414	treatment,C. concisus BAA infection	1802.44	-0.340811	0.0556738	6.12157	9.26595e-10	1.58694e-08	15023	2403	2590	877
1039_SRP051628	treatment,estradiol stimulation	1285.04	0.553099	0.0457391	-12.0925	1.15754e-33	6.1795e-32	15924	2188	1384	252
2659_SRP064832	S2101 (MCF7)	1033.1	0.569761	0.125753	-4.53079	5.87625e-06	0.000297285	14834	624	713	242
519_SRP066365	MCF-7 Cells infected with lentivirus (MISSION TRC shRNA against Nudt3, TRCN0000299497))	402.485	0.642528	0.111627	-5.75601	8.6123e-09	4.11202e-07	13085	1163	899	274.5
2123_SRP069960	LNCaP 1nM DHT	131.521	0.72193	0.162937	-4.43073	9.39153e-06	0.00195716	10009	81	55	48
1549_SRP092004	drug,THZ1 / Crizotinib 48hr	653.432	0.795921	0.0848769	-9.37736	6.76478e-21	1.11665e-19	13256	3280	3545	803
169_SRP057571	TITLE,AsPC_1_Calcipotriol_2h	248.414	0.83358	0.132685	-6.28241	3.33358e-10	6.97935e-08	13191	197	64	63
846_SRP051182	treatment,infected Hi176 at MOI of 100:1, 72hr infection	1039.73	0.858249	0.161654	-5.30919	1.10115e-07	6.02786e-06	16425	902	656	294
2126_SRP069960	LnCaP 1nM DHT	176.934	0.912781	0.145405	-6.27749	3.44074e-10	1.72315e-07	9932	77	59	12.5
511_SRP074154	AZ1366 Treated	228.042	0.962664	0.115453	-8.33815	7.54648e-17	2.31175e-15	14471	3376	3523	472
2260_SRP064391	inhibitor,PP242 treatment,10 nM E2	1358.38	1.01144	0.148701	-6.80179	1.03325e-11	1.64268e-10	13594	2750	2804	855
2467_SRP070694	transfected with,siRNA against BASP1 and treated with,100nM Tamoxifen	404.915	1.03992	0.171842	-6.0516	1.43418e-09	1.12261e-07	15107	1099	916	178
377_SRP066204	treatment,SR2211 source_name,MCF-7	1403.01	1.0651	0.0849673	-12.5354	4.77826e-36	2.58153e-34	16266	3796	4301	301
1965_SRP044917	HCC1599 cellstreatment,"GSI 72 hrs, wash out 4 hrs"	5253.76	1.06843	0.0602876	-17.7222	2.82599e-70	2.31888e-67	14772	2329	2208	18
2125_SRP069960	LNCaP SLIRP siRNA 1nM DHT	145.71	1.23001	0.15772	-7.79868	6.25564e-15	3.30199e-13	10034	1539	1378	190
2259_SRP064391	inhibitor,PP242 treatment,1 uM PaPE	1511.86	1.29505	0.147744	-8.76551	1.85928e-18	1.30785e-16	13577	2359	2436	193
187_ERP005189	treatment,"2' APCP + NAC, 2 corneas	449.214	1.39838	0.230906	-6.05604	1.39511e-09	1.17197e-07	15877	717	712	189
1536_SRP092004	drug,THZ1 48hr	171.1	1.40393	0.162832	-8.62195	6.5821e-18	1.32548e-16	13313	2648	2769	661
170_SRP057571	TITLE,AsPC_1_Calcipotriol_6h	179.388	1.41789	0.164162	-8.63714	5.76366e-18	2.45903e-16	13096	1686	1412	289
510_SRP074154	Gefitinib Treated	275.857	1.42192	0.10215	-13.9198	4.79927e-44	1.10013e-42	14569	4543	4571	635
2327_SRP036145	vitamin D treatment	501.04	1.49465	0.239322	-6.24538	4.22777e-10	2.66349e-07	12977	116	15	19
2261_SRP064391	inhibitor,PP242	1673.84	1.52103	0.145229	-10.4734	1.14511e-25	1.63353e-23	13553	2318	2585	95
1188_SRP078536	treatment,10nM R1881 30min	2672.33	1.53949	0.143084	-10.7594	5.35218e-27	8.26805e-23	15451	42	9	1
186_ERP005189	treatment,"2' APCP, 2 corneas	508.376	1.58141	0.313299	-5.04759	4.47408e-07	4.77533e-05	16010	468	246	150
983_SRP062332	treatment,krab: a guide RNA (e3 #2) recognizing the e3 enhancer region	39.6134	1.60841	0.260702	-6.16953	6.84916e-10	1.66245e-07	11412	432	321	47
1693_SRP048811	1hr treatment with 100nM E2	297.872	1.68354	0.36946	-4.55676	5.19481e-06	0.00109014	15529	145	21	74
2171_SRP110994	treatment,"PC9DTP+TSA (50nM, 5hours)"	1204.33	1.90879	0.0919626	-20.7561	1.07881e-95	4.00352e-94	16172	4967	4783	435
383_SRP059275	condition,ETC-159	8897.53	1.92003	0.122311	-15.6979	1.56313e-55	1.36297e-53	15632	4512	4519	179.5
758_SRP107198	NCI-H358 cell drug,pimasertib 10nM	19.7196	1.92053	0.367226	-5.22984	1.69655e-07	3.00187e-05	13388	341	492	75.5
1040_SRP051628	treatment,estradiol stimulation Nt-ERb condition	1177.6	1.95825	0.0549767	-35.6196	6.96926e-278	1.13353e-275	16103	4251	3840	99
2555_SRP020561	treatment,1hr treatment with 100nM E2	235.648	1.99037	0.409423	-4.86142	1.1655e-06	0.00118119	15202	47	6	15
1869_SRP039077	cell type,Airway epithelial cells treatment,flagellin	2778.65	2.10266	0.0696391	-30.1937	2.86941e-200	2.0347e-197	14182	1646	826	20
2135_SRP086612	treatment,IL17+TNF keratinocyte	59.7123	2.12962	0.416267	-5.11599	3.12106e-07	1.30115e-05	14106	870	657	338
1189_SRP078536	treatment,100nM DHT 4hr	2729.34	2.15224	0.163679	-13.1491	1.72134e-39	1.45243e-36	15191	887	826	18
655_SRP070657	treated with,10nM E2 for 1hr	1309.26	2.18603	0.126448	-17.288	5.78987e-67	4.85157e-64	14251	583	183	16.5
1187_SRP078536	treatment,10nM R1881 2hr	3699.74	2.2854	0.143347	-15.9432	3.17865e-57	2.46664e-53	15523	307	176	2
2150_SRP066956	drug treatment,WZ4002 in pc9 derivative,PC9-GR3 cells	2454.67	2.31461	0.285963	-8.09409	5.76939e-16	1.46588e-13	14812	997	890	58.5
653_SRP070657	treated with,10nM E2 for 2hr	1588.11	2.31862	0.127711	-18.1553	1.16635e-73	1.92434e-71	14522	2170	1596	88
2365_SRP018256	E2 treatment	767.002	2.39376	0.30527	-7.84145	4.45363e-15	1.55644e-12	15377	665	415	44
2136_SRP086612	treatment,TNF keratinocyte	65.3133	2.39587	0.448407	-5.34306	9.13887e-08	6.84131e-06	13867	668	446	185
1674_SRP059762	LNCaP DHT treated 3-6hr	11644.1	2.43032	0.567154	-4.28511	1.82649e-05	0.0405806	12904	5	1	4
894_SRP067666	doxycycline induced, etoposide treated	168.604	2.5413	0.394647	-6.43942	1.19927e-10	2.81646e-09	19140	4826	4012	815
2771_SRP013239	E2 treatment in MCF7	248.428	2.57415	0.275331	-9.34926	8.82631e-21	3.70918e-18	12187	671	451	29
2148_SRP066956	drug treatment,WZ4002 in pc9 derivative,PC9 WZ4002-tolerant cells	635.937	2.62463	0.278453	-9.42575	4.27037e-21	2.69831e-18	14533	1855	2278	23
1537_SRP092004	drug,THZ1 / BGJ398 48hr	332.906	2.64309	0.136005	-19.4337	4.00545e-84	1.47801e-82	13655	4282	4357	370
1422_SRP039552	H. pylori infection	51722.6	2.65329	0.192769	-13.7641	4.19212e-43	2.10636e-41	14119	4130	3856	281
620_SRP051583	LNCaP cells DHT treated	27440.2	2.76009	0.0274294	-100.625	0	0	15561	3781	3402	36
2147_SRP066956	drug treatment,Gefitinib in pc9 derivative,PC9 gefitinib-tolerant cells	754.06	2.77162	0.262373	-10.5636	4.39245e-26	2.75674e-23	14435	1692	1895	23
2830_SRP108222	1nM R1881	5211.5	2.77419	0.182325	-15.2156	2.78626e-52	1.05389e-49	15508	2625	2150	41
1540_SRP092004	drug,Erlotinib / THZ1 48hr	150.343	2.78838	0.194998	-14.2996	2.20147e-46	6.03459e-45	13651	4024	4007	498
246_SRP010054	drug treatment,R1881 cell line,LNCaP	38108.7	3.01525	0.542265	-5.56048	2.69029e-08	2.03812e-06	16170	620	394	211
161_SRP059701	LHSAR overexpressed with FOXA1	290.496	3.14617	0.218381	-14.4068	4.68909e-47	6.39156e-45	13767	2483	2248	101
2689_SRP072038	treatment protocol,FTC133 cell line treated with 50 µM digoxigenin for 48 hours	60.134	3.18857	0.55115	-5.7853	7.23842e-09	1.22517e-07	14078	2850	2821	831.5
760_SRP107198	NCI-H358 cell drug,pimasertib 1000nM	33.2861	3.24607	0.599108	-5.41816	6.02148e-08	0.000142059	13072	416	158	5
1675_SRP059762	LNCaP DHT treated 12-24hr	22893	3.30032	0.29014	-11.3749	5.57524e-30	1.31241e-26	12760	1444	621	5
2843_SRP095644	treatment,LBH589 (10nM) for 96hr	99.3915	3.4136	0.333615	-10.2322	1.42304e-24	6.30949e-23	15082	3997	3333	340
759_SRP107198	NCI-H358 cell drug,pimasertib 100nM	32.1246	3.45314	0.442542	-7.80296	6.04722e-15	6.60773e-13	13023	1312	1502	119
2146_SRP066956	PC9 cells drug treatment,Gefitinib	1007.97	3.4722	0.262543	-13.2253	6.27091e-40	7.73809e-38	14314	2803	3231	116
756_SRP107198	NCI-H358 cell drug,pimasertib + SAR405844 100nM	44.2429	3.51078	0.429367	-8.17663	2.91897e-16	2.69944e-14	13335	1445	1849	144
302_SRP014809	DHT treated LNCAP cells	1436.09	3.76867	0.446477	-8.44091	3.14877e-17	5.45682e-14	12131	107	44	7
2900_SRP091854	treatment,Isoginkgetin	5.41058	3.80021	0.593457	-6.40351	1.51842e-10	5.28452e-09	15355	3652	1980	441
2816_SRP051595	HCC364 cells, infected with shRNA against YAP1 & treated with PLX4720	1284.17	3.83485	0.349201	-10.9818	4.67592e-28	1.87811e-25	13372	1494	1815	32
301_SRP014809	DHT treated 16h C4-2B cells	2087.65	3.99502	0.398551	-10.0239	1.1974e-23	1.02322e-20	12818	412	122	15
2363_SRP052856	treatment,IL-13 (100 ng/mL) in hTERT-immortalized human esophageal epithelial cell line_ALI	414.809	4.04612	0.219016	-18.4741	3.33785e-76	2.59163e-73	12423	1210	1501	16
162_SRP059701	LHSAR overexpressed with HOXB13	559.734	4.11791	0.194963	-21.1215	5.05052e-99	4.6623e-96	13847	2026	2048	15
1534_SRP092004	drug,BGJ398 48hr	890.942	4.15667	0.114829	-36.1986	6.39694e-287	2.90869e-284	13645	4402	4557	30
2145_SRP066956	PC9 cells drug treatment,WZ4002	1896.6	4.20793	0.535064	-7.86435	3.7103e-15	1.88085e-13	14853	2309	2697	293
755_SRP107198	NCI-H358 cell drug,pimasertib + SAR405844 1000nM	73.5042	4.28647	0.328757	-13.0384	7.39818e-39	1.43546e-36	13603	2166	2544	70
707_SRP102524	treatment,androgen	12689.3	4.33445	0.0768256	-56.4193	0	0	14460	4672	4702	33.5
708_SRP102524	CEP701 and androgen treatment	8037.19	4.37881	0.0899554	-48.6776	0	0	14271	4087	3960	12.5
687_ERP016233	differentiated by treatment with 1uM Troglitazone and 1uM PD153035	1306.72	4.39824	0.650025	-6.76626	1.32156e-11	5.32122e-09	15050	582	326	37.5
2817_SRP051595	HCC364 cells, infected with shRNA against YAP1 & treated with Trametinib	1462.82	4.51722	0.37831	-11.9405	7.27794e-33	8.32397e-30	13089	1137	1309	11
2894_SRP091854	treatment,Isoginkgetin	7.73561	4.98895	0.646405	-7.71799	1.18175e-14	4.51856e-13	16030	4377	2635	419
2149_SRP066956	drug treatment,WZ4002 in pc9 derivative,PC9-GR2 cells	1097.29	6.46147	0.240656	-26.8494	8.57132e-159	2.07955e-156	14557	4197	4302	60
163_SRP059701	LHSAR cell type,LHSAR overexpressed with HOXB13 and FOXA1	2770.55	6.54403	0.148199	-44.1569	0	0	13857	2948	2894	1.5
2016_SRP061634	isolate,shSmad3 and TGFb+EGF treatment vs. TGFb and EGF alone	905.51	7.34492	0.356248	-20.6175	1.91382e-94	1.37091e-91	15774	2008	1348	22
2015_SRP061634	isolate,shPCBP1 and TGFb+EGF treatment vs. TGFb and EGF alone	2056.96	8.5001	0.331564	-25.6364	5.99651e-145	4.83468e-141	16166	2920	2285	2

## Sheet: Case-control assignments
SRP ID	SRS sample	Case or control assignment
2017_SRP061634	SRS1013503	control
2017_SRP061634	SRS1013502	control
2017_SRP061634	SRS1013500	case
2017_SRP061634	SRS1013498	case
2017_SRP061634	SRS1013501	control
2017_SRP061634	SRS1013499	case
2326_SRP051102	SRS788837	case
2326_SRP051102	SRS788846	case
2326_SRP051102	SRS788842	case
2326_SRP051102	SRS788840	case
2326_SRP051102	SRS788839	case
2326_SRP051102	SRS788841	case
2326_SRP051102	SRS788848	control
2326_SRP051102	SRS788847	control
2326_SRP051102	SRS788853	control
2326_SRP051102	SRS788845	case
2326_SRP051102	SRS788851	control
2326_SRP051102	SRS788843	case
2326_SRP051102	SRS788849	control
2326_SRP051102	SRS788855	control
2326_SRP051102	SRS788850	control
2326_SRP051102	SRS788856	control
2326_SRP051102	SRS788838	case
2326_SRP051102	SRS788844	case
2326_SRP051102	SRS788852	control
2326_SRP051102	SRS788854	control
1711_SRP059511	SRS961595	control
1711_SRP059511	SRS961598	case
1711_SRP059511	SRS961597	control
1711_SRP059511	SRS961599	case
1711_SRP059511	SRS961600	case
1711_SRP059511	SRS961596	control
1706_SRP055809	SRS862734	case
1706_SRP055809	SRS862735	case
1706_SRP055809	SRS862736	control
1706_SRP055809	SRS862733	case
1706_SRP055809	SRS862738	control
1706_SRP055809	SRS862737	control
1444_SRP102725	SRS2087488	case
1444_SRP102725	SRS2087493	control
1444_SRP102725	SRS2087495	control
1444_SRP102725	SRS2087487	case
1444_SRP102725	SRS2087494	control
1444_SRP102725	SRS2087489	case
982_SRP090830	SRS1727604	control
982_SRP090830	SRS1727602	control
982_SRP090830	SRS1727608	case
982_SRP090830	SRS1727609	case
982_SRP090830	SRS1727610	case
982_SRP090830	SRS1727603	control
654_SRP070657	SRS1306475	control
654_SRP070657	SRS1306485	control
654_SRP070657	SRS1306495	control
654_SRP070657	SRS1306476	case
654_SRP070657	SRS1306497	case
654_SRP070657	SRS1306486	case
1443_SRP102725	SRS2087492	case
1443_SRP102725	SRS2087493	control
1443_SRP102725	SRS2087491	case
1443_SRP102725	SRS2087495	control
1443_SRP102725	SRS2087490	case
1443_SRP102725	SRS2087494	control
2601_SRP049355	SRS732540	case
2601_SRP049355	SRS732532	control
2601_SRP049355	SRS732541	case
1576_SRP065559	SRS1142598	case
1576_SRP065559	SRS1142601	control
1576_SRP065559	SRS1142596	case
1576_SRP065559	SRS1142597	case
1576_SRP065559	SRS1142599	control
1576_SRP065559	SRS1142600	control
199_SRP075959	SRS1476312	control
199_SRP075959	SRS1476318	case
199_SRP075959	SRS1476316	case
199_SRP075959	SRS1476311	control
199_SRP075959	SRS1476310	control
199_SRP075959	SRS1476317	case
1565_SRP051765	SRS810668	control
1565_SRP051765	SRS810666	control
1565_SRP051765	SRS810670	case
1565_SRP051765	SRS810669	case
148_SRP108867	SRS2264328	case
148_SRP108867	SRS2264324	control
148_SRP108867	SRS2264327	case
148_SRP108867	SRS2264326	control
148_SRP108867	SRS2264329	case
148_SRP108867	SRS2264325	control
2393_SRP098916	SRS1959615	control
2393_SRP098916	SRS1959613	control
2393_SRP098916	SRS1959623	case
2393_SRP098916	SRS1959620	case
2393_SRP098916	SRS1959614	control
2393_SRP098916	SRS1959621	case
648_SRP070657	SRS1306499	case
648_SRP070657	SRS1306475	control
648_SRP070657	SRS1306485	control
648_SRP070657	SRS1306495	control
648_SRP070657	SRS1306478	case
648_SRP070657	SRS1306488	case
649_SRP070657	SRS1306489	case
649_SRP070657	SRS1306479	case
649_SRP070657	SRS1306475	control
649_SRP070657	SRS1306469	case
649_SRP070657	SRS1306485	control
649_SRP070657	SRS1306495	control
656_SRP070657	SRS1306475	control
656_SRP070657	SRS1306500	case
656_SRP070657	SRS1306485	control
656_SRP070657	SRS1306495	control
656_SRP070657	SRS1306477	case
656_SRP070657	SRS1306487	case
650_SRP070657	SRS1306490	case
650_SRP070657	SRS1306470	case
650_SRP070657	SRS1306475	control
650_SRP070657	SRS1306480	case
650_SRP070657	SRS1306485	control
650_SRP070657	SRS1306495	control
198_SRP075959	SRS1476314	case
198_SRP075959	SRS1476313	case
198_SRP075959	SRS1476315	case
198_SRP075959	SRS1476312	control
198_SRP075959	SRS1476311	control
198_SRP075959	SRS1476310	control
2394_SRP098916	SRS1959622	case
2394_SRP098916	SRS1959615	control
2394_SRP098916	SRS1959618	case
2394_SRP098916	SRS1959613	control
2394_SRP098916	SRS1959614	control
2394_SRP098916	SRS1959619	case
1248_ERP016636	ERS1270006	control
1248_ERP016636	ERS1270003	case
1248_ERP016636	ERS1270005	control
1248_ERP016636	ERS1270004	case
2537_SRP095329	SRS1870252	control
2537_SRP095329	SRS1870250	control
2537_SRP095329	SRS1870251	control
2537_SRP095329	SRS1870255	case
2537_SRP095329	SRS1870253	case
2537_SRP095329	SRS1870254	case
297_SRP075592	SRS1463673	case
297_SRP075592	SRS1463672	case
297_SRP075592	SRS1463669	control
297_SRP075592	SRS1463658	control
297_SRP075592	SRS1463671	case
297_SRP075592	SRS1463657	control
2392_SRP098916	SRS1959615	control
2392_SRP098916	SRS1959678	case
2392_SRP098916	SRS1959613	control
2392_SRP098916	SRS1959616	case
2392_SRP098916	SRS1959614	control
2392_SRP098916	SRS1959617	case
2254_SRP064391	SRS1096876	control
2254_SRP064391	SRS1096874	control
2254_SRP064391	SRS1096891	case
2254_SRP064391	SRS1096877	control
2254_SRP064391	SRS1096890	case
2254_SRP064391	SRS1096875	control
1993_SRP013389	SRS335247	case
1993_SRP013389	SRS335241	control
1993_SRP013389	SRS335245	control
1993_SRP013389	SRS335243	case
1209_SRP076054	SRS1480860	control
1209_SRP076054	SRS1480864	case
1209_SRP076054	SRS1480867	control
1209_SRP076054	SRS1480868	control
1209_SRP076054	SRS1480866	control
1209_SRP076054	SRS1480865	case
1209_SRP076054	SRS1480861	control
1209_SRP076054	SRS1480862	control
1209_SRP076054	SRS1480863	case
1874_SRP081918	SRS1615579	control
1874_SRP081918	SRS1615582	case
1874_SRP081918	SRS1615580	case
1874_SRP081918	SRS1615578	control
1874_SRP081918	SRS1615581	case
1874_SRP081918	SRS1615577	control
785_SRP031476	SRS491590	control
785_SRP031476	SRS491585	case
785_SRP031476	SRS491595	control
785_SRP031476	SRS491591	control
785_SRP031476	SRS491589	case
785_SRP031476	SRS491593	control
785_SRP031476	SRS491587	case
785_SRP031476	SRS491592	control
785_SRP031476	SRS491584	case
785_SRP031476	SRS491586	case
785_SRP031476	SRS491588	case
785_SRP031476	SRS491596	control
785_SRP031476	SRS491582	case
785_SRP031476	SRS491594	control
1577_SRP065559	SRS1142587	control
1577_SRP065559	SRS1142588	control
1577_SRP065559	SRS1142586	case
1577_SRP065559	SRS1142584	case
1577_SRP065559	SRS1142589	control
1577_SRP065559	SRS1142585	case
1846_SRP117243	SRS2505729	case
1846_SRP117243	SRS2505731	control
1846_SRP117243	SRS2505733	case
1846_SRP117243	SRS2505735	case
1846_SRP117243	SRS2505728	control
1846_SRP117243	SRS2505732	case
1846_SRP117243	SRS2505730	case
1846_SRP117243	SRS2505736	case
1846_SRP117243	SRS2505734	control
1421_SRP078414	SRS1559745	control
1421_SRP078414	SRS1559743	case
1421_SRP078414	SRS1559741	case
1421_SRP078414	SRS1559744	control
1421_SRP078414	SRS1559746	control
1421_SRP078414	SRS1559742	case
1039_SRP051628	SRS805404	case
1039_SRP051628	SRS805402	case
1039_SRP051628	SRS805406	control
1039_SRP051628	SRS805403	control
1039_SRP051628	SRS805405	control
1039_SRP051628	SRS805401	case
2659_SRP064832	SRS1114761	control
2659_SRP064832	SRS1114781	control
2659_SRP064832	SRS1114771	control
2659_SRP064832	SRS1114789	case
2659_SRP064832	SRS1114779	case
2659_SRP064832	SRS1114769	case
519_SRP066365	SRS1167798	case
519_SRP066365	SRS1167800	control
519_SRP066365	SRS1167801	control
519_SRP066365	SRS1167803	control
519_SRP066365	SRS1167802	case
519_SRP066365	SRS1167799	case
2123_SRP069960	SRS1322595	case
2123_SRP069960	SRS1322598	case
2123_SRP069960	SRS1322593	control
2123_SRP069960	SRS1322592	control
2123_SRP069960	SRS1322596	control
2123_SRP069960	SRS1322597	case
2123_SRP069960	SRS1322594	control
2123_SRP069960	SRS1322599	case
1549_SRP092004	SRS1757854	control
1549_SRP092004	SRS1757848	case
1549_SRP092004	SRS1757856	control
1549_SRP092004	SRS1757850	case
1549_SRP092004	SRS1757849	case
1549_SRP092004	SRS1757855	control
169_SRP057571	SRS918163	case
169_SRP057571	SRS918148	control
169_SRP057571	SRS918166	case
169_SRP057571	SRS918135	control
169_SRP057571	SRS918157	control
169_SRP057571	SRS918164	case
846_SRP051182	SRS791937	case
846_SRP051182	SRS791933	control
846_SRP051182	SRS791934	control
846_SRP051182	SRS791936	case
846_SRP051182	SRS791935	case
846_SRP051182	SRS791932	control
2126_SRP069960	SRS1322585	control
2126_SRP069960	SRS1322589	case
2126_SRP069960	SRS1322584	control
2126_SRP069960	SRS1322586	control
2126_SRP069960	SRS1322619	case
2126_SRP069960	SRS1322590	case
2126_SRP069960	SRS1322591	case
2126_SRP069960	SRS1322588	control
511_SRP074154	SRS1417038	control
511_SRP074154	SRS1417047	case
511_SRP074154	SRS1417044	case
511_SRP074154	SRS1417043	case
511_SRP074154	SRS1417036	control
511_SRP074154	SRS1417039	control
511_SRP074154	SRS1417046	case
511_SRP074154	SRS1417037	control
2260_SRP064391	SRS1096876	control
2260_SRP064391	SRS1096874	control
2260_SRP064391	SRS1096877	control
2260_SRP064391	SRS1096870	case
2260_SRP064391	SRS1096875	control
2260_SRP064391	SRS1096871	case
2467_SRP070694	SRS1307430	control
2467_SRP070694	SRS1307435	control
2467_SRP070694	SRS1307428	case
2467_SRP070694	SRS1307424	case
2467_SRP070694	SRS1307431	case
2467_SRP070694	SRS1307427	control
377_SRP066204	SRS1163820	case
377_SRP066204	SRS1163821	control
377_SRP066204	SRS1163819	case
377_SRP066204	SRS1163818	case
377_SRP066204	SRS1163822	control
377_SRP066204	SRS1163823	control
1965_SRP044917	SRS668054	control
1965_SRP044917	SRS668056	case
1965_SRP044917	SRS668052	case
1965_SRP044917	SRS668055	control
1965_SRP044917	SRS668059	case
1965_SRP044917	SRS668057	control
2125_SRP069960	SRS1322593	control
2125_SRP069960	SRS1322589	case
2125_SRP069960	SRS1322592	control
2125_SRP069960	SRS1322596	control
2125_SRP069960	SRS1322619	case
2125_SRP069960	SRS1322590	case
2125_SRP069960	SRS1322594	control
2125_SRP069960	SRS1322591	case
2259_SRP064391	SRS1096876	control
2259_SRP064391	SRS1096874	control
2259_SRP064391	SRS1096877	control
2259_SRP064391	SRS1096872	case
2259_SRP064391	SRS1096875	control
2259_SRP064391	SRS1096873	case
187_ERP005189	ERS418456	control
187_ERP005189	ERS418460	case
187_ERP005189	ERS418457	control
187_ERP005189	ERS418461	case
1536_SRP092004	SRS1757907	case
1536_SRP092004	SRS1757905	case
1536_SRP092004	SRS1757899	control
1536_SRP092004	SRS1757900	control
1536_SRP092004	SRS1757901	control
1536_SRP092004	SRS1757906	case
170_SRP057571	SRS918161	control
170_SRP057571	SRS918168	case
170_SRP057571	SRS918162	control
170_SRP057571	SRS918158	control
170_SRP057571	SRS918172	case
170_SRP057571	SRS918169	case
510_SRP074154	SRS1417038	control
510_SRP074154	SRS1417040	case
510_SRP074154	SRS1417036	control
510_SRP074154	SRS1417045	case
510_SRP074154	SRS1417039	control
510_SRP074154	SRS1417041	case
510_SRP074154	SRS1417042	case
510_SRP074154	SRS1417037	control
2327_SRP036145	SRS550671	case
2327_SRP036145	SRS550670	case
2327_SRP036145	SRS550653	control
2261_SRP064391	SRS1096876	control
2261_SRP064391	SRS1096874	control
2261_SRP064391	SRS1096877	control
2261_SRP064391	SRS1096868	case
2261_SRP064391	SRS1096875	control
2261_SRP064391	SRS1096869	case
1188_SRP078536	SRS1564951	case
1188_SRP078536	SRS1602462	control
1188_SRP078536	SRS1602464	control
1188_SRP078536	SRS1564952	control
1188_SRP078536	SRS1564950	control
1188_SRP078536	SRS1564953	case
186_ERP005189	ERS418456	control
186_ERP005189	ERS418459	case
186_ERP005189	ERS418457	control
186_ERP005189	ERS418458	case
983_SRP062332	SRS1029871	case
983_SRP062332	SRS1029870	case
983_SRP062332	SRS1029872	control
983_SRP062332	SRS1029876	control
983_SRP062332	SRS1029875	control
983_SRP062332	SRS1029873	control
983_SRP062332	SRS1029874	case
983_SRP062332	SRS1029869	case
1693_SRP048811	SRS719715	control
1693_SRP048811	SRS719711	control
1693_SRP048811	SRS719716	case
1693_SRP048811	SRS719712	case
2171_SRP110994	SRS2333363	control
2171_SRP110994	SRS2333361	control
2171_SRP110994	SRS2333365	case
2171_SRP110994	SRS2333366	case
2171_SRP110994	SRS2333364	case
2171_SRP110994	SRS2333362	control
383_SRP059275	SRS957170	control
383_SRP059275	SRS957174	case
383_SRP059275	SRS957172	case
383_SRP059275	SRS957171	control
383_SRP059275	SRS957175	case
383_SRP059275	SRS957173	control
383_SRP059275	SRS957176	case
383_SRP059275	SRS957169	control
758_SRP107198	SRS2206650	control
758_SRP107198	SRS2206635	case
758_SRP107198	SRS2206632	case
758_SRP107198	SRS2206633	case
758_SRP107198	SRS2206653	control
758_SRP107198	SRS2206652	control
758_SRP107198	SRS2206651	control
758_SRP107198	SRS2206654	control
758_SRP107198	SRS2206649	control
1040_SRP051628	SRS805399	control
1040_SRP051628	SRS805397	case
1040_SRP051628	SRS805400	control
1040_SRP051628	SRS805395	case
1040_SRP051628	SRS805396	case
1040_SRP051628	SRS805398	control
2555_SRP020561	SRS408626	control
2555_SRP020561	SRS408625	case
2555_SRP020561	SRS408627	control
2555_SRP020561	SRS408624	case
1869_SRP039077	SRS563734	control
1869_SRP039077	SRS563736	case
1869_SRP039077	SRS563737	case
1869_SRP039077	SRS563735	control
2135_SRP086612	SRS1672179	control
2135_SRP086612	SRS1672158	case
2135_SRP086612	SRS1672166	case
2135_SRP086612	SRS1672155	control
2135_SRP086612	SRS1672182	case
2135_SRP086612	SRS1672174	case
2135_SRP086612	SRS1672171	control
2135_SRP086612	SRS1672163	control
1189_SRP078536	SRS1602463	case
1189_SRP078536	SRS1602462	control
1189_SRP078536	SRS1602464	control
1189_SRP078536	SRS1564952	control
1189_SRP078536	SRS1602465	case
1189_SRP078536	SRS1564950	control
655_SRP070657	SRS1306494	case
655_SRP070657	SRS1306475	control
655_SRP070657	SRS1306474	case
655_SRP070657	SRS1306485	control
655_SRP070657	SRS1306495	control
655_SRP070657	SRS1306484	case
1187_SRP078536	SRS1602462	control
1187_SRP078536	SRS1602464	control
1187_SRP078536	SRS1564955	case
1187_SRP078536	SRS1564952	control
1187_SRP078536	SRS1564954	case
1187_SRP078536	SRS1564950	control
2150_SRP066956	SRS1187920	case
2150_SRP066956	SRS1187921	control
2150_SRP066956	SRS1187923	control
2150_SRP066956	SRS1187919	case
653_SRP070657	SRS1306475	control
653_SRP070657	SRS1306485	control
653_SRP070657	SRS1306495	control
653_SRP070657	SRS1306483	case
653_SRP070657	SRS1306473	case
653_SRP070657	SRS1306493	case
2365_SRP018256	SRS387933	case
2365_SRP018256	SRS387928	control
2365_SRP018256	SRS387929	control
2365_SRP018256	SRS387932	case
2136_SRP086612	SRS1672157	case
2136_SRP086612	SRS1672179	control
2136_SRP086612	SRS1672181	case
2136_SRP086612	SRS1672173	case
2136_SRP086612	SRS1672165	case
2136_SRP086612	SRS1672155	control
2136_SRP086612	SRS1672171	control
2136_SRP086612	SRS1672163	control
1674_SRP059762	SRS968575	control
1674_SRP059762	SRS968573	case
1674_SRP059762	SRS968574	case
894_SRP067666	SRS1218033	case
894_SRP067666	SRS1218037	case
894_SRP067666	SRS1218034	control
894_SRP067666	SRS1218038	control
2771_SRP013239	SRS334191	case
2771_SRP013239	SRS334187	control
2771_SRP013239	SRS334188	control
2771_SRP013239	SRS334192	case
2148_SRP066956	SRS1187914	control
2148_SRP066956	SRS1187913	control
2148_SRP066956	SRS1187911	case
2148_SRP066956	SRS1187912	case
1537_SRP092004	SRS1757896	case
1537_SRP092004	SRS1757897	case
1537_SRP092004	SRS1757899	control
1537_SRP092004	SRS1757900	control
1537_SRP092004	SRS1757901	control
1537_SRP092004	SRS1757898	case
1422_SRP039552	SRS737370	case
1422_SRP039552	SRS737371	case
1422_SRP039552	SRS737368	control
1422_SRP039552	SRS737369	control
620_SRP051583	SRS804237	case
620_SRP051583	SRS804234	control
620_SRP051583	SRS804233	control
620_SRP051583	SRS804238	case
620_SRP051583	SRS804236	case
620_SRP051583	SRS804235	control
2147_SRP066956	SRS1187918	control
2147_SRP066956	SRS1187916	case
2147_SRP066956	SRS1187915	case
2147_SRP066956	SRS1187917	control
2830_SRP108222	SRS2237480	control
2830_SRP108222	SRS2237481	case
2830_SRP108222	SRS2237479	control
2830_SRP108222	SRS2237482	case
1540_SRP092004	SRS1757880	case
1540_SRP092004	SRS1757884	control
1540_SRP092004	SRS1757877	case
1540_SRP092004	SRS1757881	control
1540_SRP092004	SRS1757879	case
1540_SRP092004	SRS1757883	control
246_SRP010054	SRS284442	control
246_SRP010054	SRS284440	control
246_SRP010054	SRS284441	control
246_SRP010054	SRS284445	case
246_SRP010054	SRS284444	case
246_SRP010054	SRS284443	case
161_SRP059701	SRS967028	control
161_SRP059701	SRS967025	case
161_SRP059701	SRS967023	case
161_SRP059701	SRS967027	control
2689_SRP072038	SRS1349869	control
2689_SRP072038	SRS1349874	control
2689_SRP072038	SRS1349866	case
2689_SRP072038	SRS1349882	control
760_SRP107198	SRS2206650	control
760_SRP107198	SRS2206653	control
760_SRP107198	SRS2206652	control
760_SRP107198	SRS2206638	case
760_SRP107198	SRS2206639	case
760_SRP107198	SRS2206637	case
760_SRP107198	SRS2206651	control
760_SRP107198	SRS2206654	control
760_SRP107198	SRS2206649	control
1675_SRP059762	SRS968575	control
1675_SRP059762	SRS968569	case
1675_SRP059762	SRS968572	case
2843_SRP095644	SRS1878620	control
2843_SRP095644	SRS1878625	case
2843_SRP095644	SRS1878622	control
2843_SRP095644	SRS1878621	control
2843_SRP095644	SRS1878624	case
2843_SRP095644	SRS1878623	case
759_SRP107198	SRS2206650	control
759_SRP107198	SRS2206636	case
759_SRP107198	SRS2206634	case
759_SRP107198	SRS2206653	control
759_SRP107198	SRS2206652	control
759_SRP107198	SRS2206651	control
759_SRP107198	SRS2206654	control
759_SRP107198	SRS2206664	case
759_SRP107198	SRS2206649	control
2146_SRP066956	SRS1187931	control
2146_SRP066956	SRS1187932	control
2146_SRP066956	SRS1187930	case
2146_SRP066956	SRS1187929	case
756_SRP107198	SRS2206650	control
756_SRP107198	SRS2206628	case
756_SRP107198	SRS2206653	control
756_SRP107198	SRS2206652	control
756_SRP107198	SRS2206626	case
756_SRP107198	SRS2206651	control
756_SRP107198	SRS2206654	control
756_SRP107198	SRS2206649	control
756_SRP107198	SRS2206627	case
302_SRP014809	SRS355516	control
302_SRP014809	SRS355517	control
302_SRP014809	SRS355519	case
302_SRP014809	SRS355518	case
2900_SRP091854	SRS1754192	control
2900_SRP091854	SRS1754204	case
2900_SRP091854	SRS1754202	case
2900_SRP091854	SRS1754230	control
2900_SRP091854	SRS1754194	control
2900_SRP091854	SRS1754215	control
2900_SRP091854	SRS1754258	control
2900_SRP091854	SRS1754200	case
2900_SRP091854	SRS1754212	control
2900_SRP091854	SRS1754191	control
2900_SRP091854	SRS1754261	case
2900_SRP091854	SRS1754187	control
2900_SRP091854	SRS1754205	control
2900_SRP091854	SRS1754227	case
2900_SRP091854	SRS1754233	control
2900_SRP091854	SRS1754203	control
2900_SRP091854	SRS1754243	case
2900_SRP091854	SRS1754232	control
2900_SRP091854	SRS1754208	control
2900_SRP091854	SRS1754186	control
2900_SRP091854	SRS1754259	control
2900_SRP091854	SRS1754189	control
2900_SRP091854	SRS1754193	control
2900_SRP091854	SRS1754201	case
2900_SRP091854	SRS1754231	control
2900_SRP091854	SRS1754195	control
2900_SRP091854	SRS1754260	case
2900_SRP091854	SRS1754241	case
2900_SRP091854	SRS1754213	control
2900_SRP091854	SRS1754214	control
2900_SRP091854	SRS1754226	case
2900_SRP091854	SRS1754184	control
2900_SRP091854	SRS1754206	control
2816_SRP051595	SRS804752	control
2816_SRP051595	SRS804756	case
2816_SRP051595	SRS804759	case
301_SRP014809	SRS355513	control
301_SRP014809	SRS355512	control
301_SRP014809	SRS355514	case
301_SRP014809	SRS355515	case
2363_SRP052856	SRS827719	case
2363_SRP052856	SRS827720	case
2363_SRP052856	SRS827724	control
2363_SRP052856	SRS827722	control
2363_SRP052856	SRS827718	control
2363_SRP052856	SRS827723	case
162_SRP059701	SRS967028	control
162_SRP059701	SRS967022	case
162_SRP059701	SRS967021	case
162_SRP059701	SRS967027	control
1534_SRP092004	SRS1757893	case
1534_SRP092004	SRS1757894	case
1534_SRP092004	SRS1757899	control
1534_SRP092004	SRS1757900	control
1534_SRP092004	SRS1757901	control
1534_SRP092004	SRS1757895	case
2145_SRP066956	SRS1187931	control
2145_SRP066956	SRS1187932	control
2145_SRP066956	SRS1187928	case
2145_SRP066956	SRS1187927	case
755_SRP107198	SRS2206630	case
755_SRP107198	SRS2206650	control
755_SRP107198	SRS2206631	case
755_SRP107198	SRS2206653	control
755_SRP107198	SRS2206629	case
755_SRP107198	SRS2206652	control
755_SRP107198	SRS2206651	control
755_SRP107198	SRS2206654	control
755_SRP107198	SRS2206649	control
707_SRP102524	SRS2074408	case
707_SRP102524	SRS2074411	control
707_SRP102524	SRS2074397	control
707_SRP102524	SRS2074399	control
707_SRP102524	SRS2074409	control
707_SRP102524	SRS2074396	case
707_SRP102524	SRS2074398	control
707_SRP102524	SRS2074410	control
707_SRP102524	SRS2074395	case
707_SRP102524	SRS2074406	case
707_SRP102524	SRS2074407	case
707_SRP102524	SRS2074394	case
708_SRP102524	SRS2074388	case
708_SRP102524	SRS2074411	control
708_SRP102524	SRS2074397	control
708_SRP102524	SRS2074389	case
708_SRP102524	SRS2074390	case
708_SRP102524	SRS2074399	control
708_SRP102524	SRS2074409	control
708_SRP102524	SRS2074398	control
708_SRP102524	SRS2074410	control
687_ERP016233	ERS1217346	control
687_ERP016233	ERS1217345	case
687_ERP016233	ERS1217348	control
687_ERP016233	ERS1217344	control
687_ERP016233	ERS1217347	case
687_ERP016233	ERS1217349	case
2817_SRP051595	SRS804757	case
2817_SRP051595	SRS804752	control
2817_SRP051595	SRS804760	case
2894_SRP091854	SRS1754192	control
2894_SRP091854	SRS1754230	control
2894_SRP091854	SRS1754194	control
2894_SRP091854	SRS1754215	control
2894_SRP091854	SRS1754258	control
2894_SRP091854	SRS1754212	control
2894_SRP091854	SRS1754191	control
2894_SRP091854	SRS1754183	case
2894_SRP091854	SRS1754187	control
2894_SRP091854	SRS1754205	control
2894_SRP091854	SRS1754233	control
2894_SRP091854	SRS1754203	control
2894_SRP091854	SRS1754232	control
2894_SRP091854	SRS1754225	case
2894_SRP091854	SRS1754208	control
2894_SRP091854	SRS1754186	control
2894_SRP091854	SRS1754259	control
2894_SRP091854	SRS1754189	control
2894_SRP091854	SRS1754193	control
2894_SRP091854	SRS1754231	control
2894_SRP091854	SRS1754195	control
2894_SRP091854	SRS1754190	case
2894_SRP091854	SRS1754188	case
2894_SRP091854	SRS1754213	control
2894_SRP091854	SRS1754224	case
2894_SRP091854	SRS1754214	control
2894_SRP091854	SRS1754184	control
2894_SRP091854	SRS1754206	control
2149_SRP066956	SRS1187924	case
2149_SRP066956	SRS1187926	control
2149_SRP066956	SRS1187925	control
2149_SRP066956	SRS1187922	case
163_SRP059701	SRS967028	control
163_SRP059701	SRS967026	case
163_SRP059701	SRS967024	case
163_SRP059701	SRS967027	control
2016_SRP061634	SRS1013500	control
2016_SRP061634	SRS1013498	control
2016_SRP061634	SRS1013488	case
2016_SRP061634	SRS1013487	case
2016_SRP061634	SRS1013486	case
2016_SRP061634	SRS1013499	control
2015_SRP061634	SRS1013500	control
2015_SRP061634	SRS1013492	case
2015_SRP061634	SRS1013498	control
2015_SRP061634	SRS1013494	case
2015_SRP061634	SRS1013499	control
2015_SRP061634	SRS1013493	case
