# Supplementary material for: Transcriptional Inhibition of Host Viral Entry Proteins as a Therapeutic Strategy for SARS-CoV-2
Source: Preprints.org preprint supplement (doi:10.20944/preprints202003.0360.v1), 2020-03-24
Supplement: Supplementary file 3 [file Supplementary_Table_2_ACE2_modulators.xlsx]

## Sheet: Transcriptional modulators
SRP ID (see tab 2 for sample assignments)	Manual annotation string	baseMean	log2(FC), negative = down-regulation in treatment	lfcSE	stat	raw p-value	adjusted p-value (within study)	Number genes tested by DESeq	Number of genes with raw p<0.05 and up-regulation	Number of genes with raw p<0.05 and down-regulation	ACE2 rank out of all genes, by p-value
1363_SRP065849	treatment,vemurafenib	41.1084	-7.83505	1.12923	6.93841	3.96543e-12	1.31894e-10	17533	3140	2983	521
1721_SRP044084	hCMs with genotype/variation,ALDH2*2	99.0056	-2.71525	0.478732	5.67176	1.41339e-08	1.59984e-06	13583	143	768	120
156_SRP075763	treatment,CPI-203 200microM in bronchial epithelial cells	174.275	-2.63664	0.267605	9.85271	6.67195e-23	2.74744e-20	15701	1384	1686	38
52_SRP091772	72 hour 1uM Sorafenib Treatment hiPSC-CM lines	168.962	-2.38718	0.189769	12.5794	2.74093e-36	2.00063e-34	16136	2978	3300	221
1706_SRP055809	treatment,DAPT H1 hESC	60.0793	-2.36345	0.328687	7.19055	6.45289e-13	2.12175e-11	15983	1997	2030	486
74_SRP058375	BxPC-3 exosomes	212.883	-2.20789	0.359398	6.14331	8.08204e-10	1.78081e-08	14838	2064	2254	673
2602_SRP111110	knockout (no annotation)	27.9172	-2.14226	0.436221	4.91095	9.06344e-07	2.59723e-05	13584	1360	1059	474
882_SRP101882	JQ-1	142.344	-1.70143	0.14375	11.8361	2.53994e-32	7.04724e-31	14516	3960	3955	523
837_SRP052950	erlotinib treatment	28.307	0.938287	0.217708	-4.30984	1.63376e-05	0.000314655	14417	1125	1175	705
2309_SRP045985	infection,infected with lenti-POU2AF1 virus	151.567	1.52855	0.116173	-13.1576	1.53921e-39	4.55571e-38	15607	4220	4400	527
977_SRP046226	treatment,HRV16 non-asthamatic	22.4977	1.69901	0.329727	-5.15278	2.56657e-07	5.61589e-06	8846	1124	876	403
383_SRP059275	condition,ETC-159	4365.18	2.04915	0.206111	-9.94197	2.73362e-23	4.89077e-22	15632	4512	4519	873
892_SRP067666	doxycycline induced	45.4685	2.07679	0.473149	-4.3893	1.13715e-05	0.000948374	18181	446	14	218
2148_SRP066956	drug treatment,WZ4002 in pc9 derivative,PC9 WZ4002-tolerant cells	615.439	2.12194	0.345477	-6.14205	8.14609e-10	3.66524e-08	14533	1855	2278	323
978_SRP046226	treatment,HRV16, asthamatic	31.7136	2.4118	0.280723	-8.59136	8.59435e-18	2.77093e-16	8818	1647	1501	273.5
686_ERP016233	differentiated by treatment with 1uM Troglitazone and 1uM PD153035	70.1274	2.50275	0.40279	-6.21352	5.18103e-10	6.85767e-08	14337	864	797	108
519_SRP066365	MCF-7 Cells infected with lentivirus (MISSION TRC shRNA against Nudt3, TRCN0000299497))	24.4782	2.51871	0.477336	-5.27661	1.31598e-07	4.82341e-06	13085	1163	899	357
2147_SRP066956	drug treatment,Gefitinib in pc9 derivative,PC9 gefitinib-tolerant cells	459.459	2.58241	0.387348	-6.66691	2.61237e-11	2.31347e-09	14435	1692	1895	163
1539_SRP092004	drug,Erlotinib 48hr	261.27	2.69305	0.148072	-18.1875	6.48872e-74	1.37895e-72	13519	4355	4370	636
2146_SRP066956	PC9 cells drug treatment,Gefitinib	475.32	2.93804	0.359361	-8.17573	2.94074e-16	5.8545e-15	14314	2803	3231	719
2145_SRP066956	PC9 cells drug treatment,WZ4002	611.897	3.09221	0.40783	-7.58211	3.39974e-14	1.51187e-12	14853	2309	2697	334
707_SRP102524	treatment,androgen	51.4143	3.28598	0.235814	-13.9346	3.90302e-44	5.8529e-43	14460	4672	4702	964
1538_SRP092004	drug,Erlotinib 7days	457.875	3.35898	0.1317	-25.5049	1.74113e-143	1.14726e-141	13971	4614	4641	212
708_SRP102524	CEP701 and androgen treatment	42.0314	3.69371	0.260746	-14.1659	1.48875e-45	3.26244e-44	14271	4087	3960	651
2149_SRP066956	drug treatment,WZ4002 in pc9 derivative,PC9-GR2 cells	412.214	4.59216	0.32351	-14.1948	9.86283e-46	2.67362e-44	14557	4197	4302	537
1919_SRP040418	MCF7 treatment,1 uM genistein and adenovirus expressing ERB and siRNA against endogenous ERa	48.7005	4.72465	0.66943	-7.05772	1.69257e-12	2.47831e-11	14408	3303	2702	984
2504_SRP058804	Gata6 overexpressing hESC line1 in mTeSR media	97.1654	5.07207	0.800481	-6.33628	2.35381e-10	8.58424e-09	16156	2056	1351	443
1920_SRP040418	MCF7 treatment,1 uM liquiritigenin and adenovirus expressing ERB and siRNA against endogenous ERa	60.4348	5.13516	0.643092	-7.98511	1.404e-15	2.77018e-14	14285	3452	3036	724
2053_SRP068046	G9a knockdown with E2 treatment	226.163	5.14323	0.432387	-11.895	1.25683e-32	4.64052e-30	14769	1496	680	40
2052_SRP068046	G9a knockdown	278.42	5.4258	0.40847	-13.2832	2.89619e-40	1.35747e-37	14818	1597	732	31
2503_SRP058804	Gata6 overexpressing hESC line1 in KSR media	260.178	6.8426	0.60636	-11.2847	1.56146e-29	2.22564e-27	15964	2247	1451	112
465_SRP093740	compound name,Milrinone	235.743	9.09452	2.07304	-4.38703	1.14906e-05	0.00919251	3047	4	2	1

## Sheet: Case-control assignments
SRP ID	SRS sample	Case or control assignment
1363_SRP065849	SRS1153881	case
1363_SRP065849	SRS1153883	case
1363_SRP065849	SRS1153885	control
1363_SRP065849	SRS1153879	case
1363_SRP065849	SRS1153880	case
1363_SRP065849	SRS1153884	control
1363_SRP065849	SRS1153886	control
1363_SRP065849	SRS1153882	case
1363_SRP065849	SRS1153887	control
1721_SRP044084	SRS654508	control
1721_SRP044084	SRS654507	control
1721_SRP044084	SRS654509	case
1721_SRP044084	SRS654510	case
156_SRP075763	SRS1468288	control
156_SRP075763	SRS1468290	control
156_SRP075763	SRS1468283	case
156_SRP075763	SRS1468282	case
156_SRP075763	SRS1468289	control
156_SRP075763	SRS1468284	case
52_SRP091772	SRS1752147	case
52_SRP091772	SRS1752145	case
52_SRP091772	SRS1752149	case
52_SRP091772	SRS1752143	control
52_SRP091772	SRS1752140	control
52_SRP091772	SRS1752142	control
52_SRP091772	SRS1752146	case
52_SRP091772	SRS1752148	case
52_SRP091772	SRS1752144	control
52_SRP091772	SRS1752141	control
1706_SRP055809	SRS862734	case
1706_SRP055809	SRS862735	case
1706_SRP055809	SRS862736	control
1706_SRP055809	SRS862733	case
1706_SRP055809	SRS862738	control
1706_SRP055809	SRS862737	control
74_SRP058375	SRS937772	control
74_SRP058375	SRS937779	control
74_SRP058375	SRS937780	control
74_SRP058375	SRS937770	case
74_SRP058375	SRS937769	case
74_SRP058375	SRS937771	case
2602_SRP111110	SRS2337012	control
2602_SRP111110	SRS2337014	control
2602_SRP111110	SRS2337017	case
2602_SRP111110	SRS2337016	case
2602_SRP111110	SRS2337015	case
2602_SRP111110	SRS2337013	control
882_SRP101882	SRS2045035	control
882_SRP101882	SRS2045041	case
882_SRP101882	SRS2045038	control
882_SRP101882	SRS2045036	control
882_SRP101882	SRS2045042	case
882_SRP101882	SRS2045039	case
882_SRP101882	SRS2045040	case
882_SRP101882	SRS2045037	control
837_SRP052950	SRS829765	case
837_SRP052950	SRS829776	control
837_SRP052950	SRS829764	case
837_SRP052950	SRS829772	case
837_SRP052950	SRS829763	case
837_SRP052950	SRS829770	control
837_SRP052950	SRS829762	control
837_SRP052950	SRS829773	case
837_SRP052950	SRS829775	case
837_SRP052950	SRS829771	control
837_SRP052950	SRS829761	control
2309_SRP045985	SRS693311	control
2309_SRP045985	SRS693317	case
2309_SRP045985	SRS693309	control
2309_SRP045985	SRS693313	control
2309_SRP045985	SRS693315	case
2309_SRP045985	SRS693310	control
2309_SRP045985	SRS693312	control
2309_SRP045985	SRS693316	case
2309_SRP045985	SRS693314	control
977_SRP046226	SRS694628	case
977_SRP046226	SRS694634	control
977_SRP046226	SRS694635	control
977_SRP046226	SRS694632	control
977_SRP046226	SRS694630	case
977_SRP046226	SRS694629	case
977_SRP046226	SRS694626	case
977_SRP046226	SRS694633	control
977_SRP046226	SRS694625	case
977_SRP046226	SRS694631	control
977_SRP046226	SRS694636	control
977_SRP046226	SRS694627	case
383_SRP059275	SRS957170	control
383_SRP059275	SRS957174	case
383_SRP059275	SRS957172	case
383_SRP059275	SRS957171	control
383_SRP059275	SRS957175	case
383_SRP059275	SRS957173	control
383_SRP059275	SRS957176	case
383_SRP059275	SRS957169	control
892_SRP067666	SRS1218036	case
892_SRP067666	SRS1218034	control
892_SRP067666	SRS1218038	control
892_SRP067666	SRS1218032	case
2148_SRP066956	SRS1187914	control
2148_SRP066956	SRS1187913	control
2148_SRP066956	SRS1187911	case
2148_SRP066956	SRS1187912	case
978_SRP046226	SRS694615	case
978_SRP046226	SRS694621	control
978_SRP046226	SRS694614	case
978_SRP046226	SRS694618	case
978_SRP046226	SRS694616	case
978_SRP046226	SRS694619	control
978_SRP046226	SRS694613	case
978_SRP046226	SRS694620	control
978_SRP046226	SRS694617	case
978_SRP046226	SRS694622	control
978_SRP046226	SRS694623	control
978_SRP046226	SRS694624	control
686_ERP016233	ERS1217343	case
686_ERP016233	ERS1217342	control
686_ERP016233	ERS1217340	control
686_ERP016233	ERS1217339	case
686_ERP016233	ERS1217341	case
686_ERP016233	ERS1217338	control
519_SRP066365	SRS1167798	case
519_SRP066365	SRS1167800	control
519_SRP066365	SRS1167801	control
519_SRP066365	SRS1167803	control
519_SRP066365	SRS1167802	case
519_SRP066365	SRS1167799	case
2147_SRP066956	SRS1187918	control
2147_SRP066956	SRS1187916	case
2147_SRP066956	SRS1187915	case
2147_SRP066956	SRS1187917	control
1539_SRP092004	SRS1757885	case
1539_SRP092004	SRS1757882	case
1539_SRP092004	SRS1757884	control
1539_SRP092004	SRS1757881	control
1539_SRP092004	SRS1757886	case
1539_SRP092004	SRS1757883	control
2146_SRP066956	SRS1187931	control
2146_SRP066956	SRS1187932	control
2146_SRP066956	SRS1187930	case
2146_SRP066956	SRS1187929	case
2145_SRP066956	SRS1187931	control
2145_SRP066956	SRS1187932	control
2145_SRP066956	SRS1187928	case
2145_SRP066956	SRS1187927	case
707_SRP102524	SRS2074408	case
707_SRP102524	SRS2074411	control
707_SRP102524	SRS2074397	control
707_SRP102524	SRS2074399	control
707_SRP102524	SRS2074409	control
707_SRP102524	SRS2074396	case
707_SRP102524	SRS2074398	control
707_SRP102524	SRS2074410	control
707_SRP102524	SRS2074395	case
707_SRP102524	SRS2074406	case
707_SRP102524	SRS2074407	case
707_SRP102524	SRS2074394	case
1538_SRP092004	SRS1757889	case
1538_SRP092004	SRS1757888	case
1538_SRP092004	SRS1757884	control
1538_SRP092004	SRS1757881	control
1538_SRP092004	SRS1757887	case
1538_SRP092004	SRS1757883	control
708_SRP102524	SRS2074388	case
708_SRP102524	SRS2074411	control
708_SRP102524	SRS2074397	control
708_SRP102524	SRS2074389	case
708_SRP102524	SRS2074390	case
708_SRP102524	SRS2074399	control
708_SRP102524	SRS2074409	control
708_SRP102524	SRS2074398	control
708_SRP102524	SRS2074410	control
2149_SRP066956	SRS1187924	case
2149_SRP066956	SRS1187926	control
2149_SRP066956	SRS1187925	control
2149_SRP066956	SRS1187922	case
1919_SRP040418	SRS579420	control
1919_SRP040418	SRS579419	control
1919_SRP040418	SRS579439	case
1919_SRP040418	SRS579440	case
2504_SRP058804	SRS948002	control
2504_SRP058804	SRS948004	case
2504_SRP058804	SRS948000	control
2504_SRP058804	SRS948005	case
1920_SRP040418	SRS579420	control
1920_SRP040418	SRS579443	case
1920_SRP040418	SRS579419	control
1920_SRP040418	SRS579444	case
2053_SRP068046	SRS1234132	control
2053_SRP068046	SRS1234133	control
2053_SRP068046	SRS1234131	control
2053_SRP068046	SRS1234138	case
2052_SRP068046	SRS1234132	control
2052_SRP068046	SRS1234133	control
2052_SRP068046	SRS1234137	case
2052_SRP068046	SRS1234131	control
2503_SRP058804	SRS948006	case
2503_SRP058804	SRS948008	case
2503_SRP058804	SRS948001	control
2503_SRP058804	SRS948003	control
465_SRP093740	SRS1804780	case
465_SRP093740	SRS1804686	control
465_SRP093740	SRS1804766	control
465_SRP093740	SRS1804695	control
465_SRP093740	SRS1804734	control
465_SRP093740	SRS1804713	control
465_SRP093740	SRS1804747	control
