# Supplementary material for: Transcriptional Inhibition of Host Viral Entry Proteins as a Therapeutic Strategy for SARS-CoV-2
Source: Preprints.org preprint supplement (doi:10.20944/preprints202003.0360.v1), 2020-03-24
Supplement: Supplementary file 4 [file Supplementary_Table_3_CTSB_modulators.xlsx]

## Sheet: Transcriptional modulators
SRP ID (see tab 2 for sample assignments)	Manual annotation string	baseMean	log2(FC), negative = down-regulation in treatment	lfcSE	stat	raw p-value	adjusted p-value (within study)	Number genes tested by DESeq	Number of genes with raw p<0.05 and up-regulation	Number of genes with raw p<0.05 and down-regulation	CTSB rank out of all genes, by p-value
1468_SRP100936	treatment,P. aeruginosa strain 753 stimulated	19439.2	-3.00443	0.0864574	34.7504	1.36476e-264	3.52406e-262	14203	3451	3848	55
578_DRP002315	poly I:C stimulated	3487	-2.6957	0.403864	6.67476	2.47643e-11	6.20439e-10	13980	2361	3292	558
3032_SRP056200	source_name,"U2OS, Myc activation + Torin-1"	172.584	-2.65702	0.463001	5.73869	9.54121e-09	2.10738e-07	4815	1043	964	218
1016_SRP068450	drug,THZ1 50nM 2-4 hr	26764.5	-2.6472	0.20558	12.8767	6.08483e-38	4.06357e-36	15627	3295	3209	234
1017_SRP068450	drug,THZ1 50nM 4-6hr	25843.8	-2.45542	0.173101	14.1849	1.13653e-45	7.24247e-44	15485	3873	3802	243
2696_SRP072038	treatment protocol,FTC133 cell line treated with 50 µM proscillaridin A for 72 hours	6314.32	-2.24935	0.268111	8.38963	4.87677e-17	1.13424e-15	15420	4182	4482	663
2_SRP010350	Digoxin	75.9224	-2.1963	0.374056	5.87157	4.3169e-09	2.53137e-07	3710	364	330	62.5
3_SRP010350	Peruvoside	73.4506	-2.13623	0.389401	5.48594	4.11274e-08	3.0714e-06	3735	296	287	50
1928_SRP044298	sirna treatment,SART1	1236.26	-2.09333	0.0881378	23.7506	1.08193e-124	2.3923e-122	11719	3341	3189	53
3033_SRP056200	source_name,"U2OS, Myc activation (36 hr)"	256.238	-1.99385	0.391374	5.09449	3.4968e-07	4.59723e-05	6447	212	384	49
2695_SRP072038	treatment protocol,FTC133 cell line treated with 50 µM proscillaridin A for 48 hours	5002.13	-1.93177	0.274697	7.03236	2.03067e-12	3.36234e-11	14190	3585	3540	857
2681_SRP072038	treatment protocol,BC-PAP cell line treated with 50 µM proscillaridin A for 24 hours	4395.53	-1.88734	0.356193	5.29865	1.16663e-07	3.42566e-06	14770	2024	1855	503
2809_ERP013870	RD BMI1 siRNA	13532.7	-1.60514	0.0899826	17.8384	3.56022e-71	5.97696e-69	15613	3874	4081	93
1298_SRP056084	treatment,Myc activation (36 hr)	13021.6	-1.23979	0.262165	4.72905	2.25567e-06	0.000105304	17223	758	1004	326
251_SRP090891	MMACSF Vemurafenib 48h	11321.9	-1.17933	0.0418045	28.2107	4.31777e-175	1.2285e-172	12519	2847	3300	44
1860_SRP064458	treatment,VP55+dsRNA	4081.43	-1.06265	0.189717	5.6012	2.12869e-08	5.15372e-07	13342	2112	1310	528
1680_SRP064418	treatment,JQ1 and PD0325901 and NSD2 shRNA vs. doxycycline control	8040.99	-1.04697	0.0533022	19.6421	6.74987e-86	9.77111e-84	14476	3286	3471	100
2775_SRP049988	A549 EHF overexpression	27004.5	-1.01971	0.114213	8.92809	4.33418e-19	2.51769e-16	16266	2095	1695	28
250_SRP090891	MMACSF Vemurafenib 24hr	9050.26	-0.96979	0.0742469	13.0617	5.45013e-39	6.09176e-37	12295	1871	2221	110
22_SRP065206	Senescent IMR90 shp53/Rb	19781.4	-0.945536	0.0434604	21.7563	6.0256e-105	3.60589e-102	12567	2776	2930	21
2125_SRP069960	LNCaP SLIRP siRNA 1nM DHT	94.8785	-0.889257	0.182952	4.8606	1.17032e-06	1.42269e-05	10034	1539	1378	825
127_SRP051772	Nodal/Activin/TGFb inhibitor and FGF2 vs. FGF alone	5075.75	-0.870669	0.129307	6.73335	1.65801e-11	2.85907e-10	14381	2835	3117	832
1683_SRP064418	treatment,JQ1 and PD0325901 and NSD2 shRNA and doxycyclinevs. doxycycline control	7785.81	-0.823841	0.06986	11.7927	4.2542e-32	1.64571e-30	14468	3515	3487	374
1859_SRP064458	treatment,VP55 9 day	5789.71	-0.801247	0.164987	4.85644	1.19517e-06	2.39306e-05	13228	1870	1284	660
2240_SRP061772	cell type,brain rhabdoid tumor derived cell line treatment/condition,Doxycycline induced SMARCB1 reexpresion	6858.6	-0.795331	0.0286432	27.7669	1.08982e-169	6.65432e-167	13442	2515	2535	22
1686_SRP064418	treatment,JQ1 and PD0325901 and NSD2 shRNA vs. NSD2 shRNA control	7360.05	-0.692878	0.0691395	10.0214	1.2269e-23	3.28213e-22	14419	3035	3117	539
591_SRP013773	treatment,H2A.Z KD	10878	-0.663421	0.127427	5.20629	1.92654e-07	6.0875e-06	19822	1018	2381	530
2448_SRP055981	CD4+ T cells treatment,HIV infected	24173.9	-0.63357	0.0538993	11.7547	6.6794e-32	2.26003e-30	15666	4273	4447	463
24_SRP065206	Senescent IMR90 shp16/p21	21591.3	-0.625072	0.0301506	20.7317	1.79369e-95	9.60328e-93	12314	1841	2095	23
2650_SRP091857	treatment,HCC95 overexpressing KLF5 WT	3465.09	-0.615197	0.0794278	7.74536	9.53123e-15	1.20641e-12	11898	565	666	94
1681_SRP064418	treatment,JQ1 and NSD2 shRNA vs. doxycycline control	8421.56	-0.608207	0.0670151	9.07566	1.12991e-19	1.3219e-17	14273	2049	1980	122
1679_SRP064418	treatment,PD0325901 and NSD2 shRNA vs. doxycycline control	8774.8	-0.568341	0.0413191	13.7549	4.75755e-43	1.17308e-41	14745	3737	4312	598
23_SRP065206	Senescent IMR90 shp53	19304.5	-0.54404	0.033021	16.4756	5.49806e-61	2.79645e-58	12207	1094	1386	24
2179_SRP093727	siERG in HAEC cells	11891.6	-0.47394	0.103739	4.56856	4.91076e-06	0.000147762	15126	1062	1122	492
1357_SRP112723	treatment,RG7834	14510	-0.456045	0.0278355	16.3836	2.50667e-60	9.09251e-58	16232	648	1436	30
1231_SRP066865	treatment,Precursor miR-1343 (Life Technologies) in A549 cells	11673.5	-0.451142	0.0289176	15.6009	7.17465e-55	6.72612e-53	14921	3530	3842	159
2939_SRP017788	cell line,MDA-MB-231 treatment,CXCL12 (300ng/mL) + IGF1 (100ng/mL)	8362.19	-0.383797	0.0398476	9.63162	5.87968e-22	1.92106e-20	13424	2494	2530	378.5
1806_SRP038101	treatment,Aza	4296.53	-0.376324	0.0497607	7.56268	3.9485e-14	1.43162e-12	12691	1799	1973	350
2394_SRP098916	treatment,E2	3423.56	-0.331089	0.0462116	7.16464	7.79901e-13	1.15779e-11	14210	2765	2526	957
2649_SRP091857	treatment,HCC95 overexpressing KLF5 E419Q	3488.71	-0.321473	0.0726109	4.42734	9.54023e-06	0.00025478	11804	591	585	442
27_SRP065206	Quiescent IMR90 shp65	9135.5	-0.31616	0.055776	5.66838	1.44151e-08	2.03998e-06	12313	342	279	87
980_SRP090830	GSI treatment	5422.17	-0.276171	0.0631183	4.37545	1.21184e-05	0.000219969	13759	1044	1389	758
1232_SRP066865	treatment,Precursor miR-1343 (Life Technologies) in cell type,16HBE14o- cells	17540.5	-0.225843	0.0189688	11.906	1.10112e-32	5.64005e-31	15065	2531	3113	294
1356_SRP112723	treatment,RG7834	16674.6	-0.195111	0.0398526	4.89581	9.79e-07	2.03805e-05	16910	332	1578	576
1879_SRP044854	infection with adenovirus with MEK MCF10A Cell Line	11007.2	0.177428	0.0254835	-6.96247	3.34365e-12	1.23706e-10	13867	1871	1802	374
1880_SRP044854	infection with adenovirus with MEK and EGFR MCF10A Cell Line	9185.92	0.220031	0.0271477	-8.10494	5.27727e-16	2.63341e-14	13635	2037	1843	273
170_SRP057571	TITLE,AsPC_1_Calcipotriol_6h	11871	0.222098	0.028735	-7.72919	1.08229e-14	3.63614e-13	13096	1686	1412	367
519_SRP066365	MCF-7 Cells infected with lentivirus (MISSION TRC shRNA against Nudt3, TRCN0000299497))	3228.25	0.247698	0.054601	-4.53651	5.71915e-06	0.000136312	13085	1163	899	549
424_SRP049436	treatment,0.3 µg/mL Doxycycline	3933.18	0.25391	0.0511784	-4.96127	7.00328e-07	0.00010773	14035	268	228	70
35_SRP065206	Proliferating IMR90 shp53	8788.13	0.260103	0.0419187	-6.20492	5.47231e-10	9.05566e-09	12378	1733	1750	748
2496_SRP055454	skin fibroblast cells treated with Novartis compound NVS_SM3	50367	0.284221	0.0295159	-9.62943	6.00623e-22	8.94785e-20	13574	1680	1711	84
422_SRP049436	treatment,0.1 µg/mL Doxycycline	3503.46	0.319216	0.0430803	-7.40978	1.2651e-13	8.49168e-12	13696	1028	658	204
1421_SRP078414	treatment,C. concisus BAA infection	9830.71	0.328779	0.0415608	-7.91081	2.55722e-15	9.82339e-14	15023	2403	2590	391
25_SRP065206	Senescent IMR90 shBrd4	25904.6	0.35115	0.0404271	-8.68601	3.75392e-18	6.40001e-17	12207	2716	2872	716
2422_SRP111577	ovarian cells infected with pLenti-GIII-CMV-RFP-2A-Puro-CD95L	38899.4	0.358814	0.0607173	-5.9096	3.42948e-09	1.28377e-07	15928	1474	2657	376
2449_SRP062773	UTX-KD	6918.66	0.372621	0.0420655	-8.85811	8.1381e-19	1.49671e-17	15791	2697	3309	792
1745_SRP110615	treatment,AZA + RA in LAN1 cells	667.637	0.388933	0.0799074	-4.8673	1.13133e-06	2.33356e-05	13399	1695	1695	647.5
903_SRP076286	LOUCY cells treatment,GSK2879552	1880.75	0.389316	0.0684261	-5.68958	1.2735e-08	2.93715e-07	13829	1214	1113	599.5
1871_SRP081918	treatment,STAT3 pooled siRNA	11249.4	0.397274	0.0469327	-8.46477	2.56667e-17	6.14223e-16	15893	2708	2680	664
1865_SRP056665	cell_line,SF268 siYAP6	19021.6	0.398097	0.0217864	-18.2728	1.36369e-74	2.65047e-73	15651	4892	4839	805
2476_SRP064747	treatment,UNC0638	42235.8	0.404113	0.0786608	-5.13742	2.7854e-07	2.19465e-05	14546	509	389	162.5
1588_SRP050193	JQ1 SUM159 cells	14735.8	0.411674	0.0764872	-5.38226	7.35561e-08	1.60368e-06	14651	1665	1904	672
189_SRP076716	TITLE,CTG-0331 400mg/kg Tazemetostat 35 day treatment BID 0331-8_L6.D710	8273.99	0.412832	0.0736345	-5.6065	2.06455e-08	8.25963e-07	17552	2119	2254	438
1179_SRP063980	JQ1	15259.3	0.417779	0.0253953	-16.4511	8.24062e-61	1.47754e-59	14327	4935	4958	799
1545_SRP092004	drug,THZ1 48hr	6558.82	0.421815	0.0363229	-11.6129	3.54238e-31	3.15033e-29	13162	1687	2007	148
2595_SRP071942	BI-7273	7386.87	0.434768	0.0795526	-5.46516	4.62499e-08	1.57157e-05	14432	146	72	40
896_SRP023199	HeLa cells transduced with anti-ASCC3 shRNA	3320.62	0.444234	0.0610319	-7.27872	3.37007e-13	9.14372e-12	14791	2273	2797	545
510_SRP074154	Gefitinib Treated	11926	0.475778	0.036602	-12.9987	1.2446e-38	2.37126e-37	14569	4543	4571	764
2979_SRP076175	protocol,differentiated for 5 days into osteoblastic lineage treatment,siBRD4	21783.6	0.504796	0.0642849	-7.85248	4.07903e-15	1.30934e-13	14569	2845	3188	453
162_SRP059701	LHSAR overexpressed with HOXB13	17007.6	0.509451	0.0652251	-7.81067	5.68864e-15	2.03541e-13	13847	2026	2048	387
1370_SRP109645	MYCL shRNA	1307.59	0.510726	0.0646816	-7.89601	2.87964e-15	7.15174e-14	14964	2778	2825	602
423_SRP049436	treatment,0.3 µg/mL Doxycycline	3802.56	0.535332	0.0445866	-12.0066	3.2818e-33	3.78036e-31	13823	1917	1315	120
1420_SRP097129	siNSUN2	6295.04	0.552377	0.0394014	-14.0192	1.18888e-44	1.45266e-42	13602	2332	2179	107
2469_SRP100068	treatment,recombinant human Jagged1	22436.4	0.560459	0.119461	-4.69156	2.71128e-06	8.63333e-05	13143	674	787	412
983_SRP062332	treatment,krab: a guide RNA (e3 #2) recognizing the e3 enhancer region	1039.24	0.563854	0.0710239	-7.93894	2.03918e-15	2.07361e-12	11412	432	321	11.5
1408_SRP092535	drug treatment,IRAK4 inhibitor	3881.28	0.582016	0.0707499	-8.22639	1.92945e-16	3.49889e-15	12712	2430	2976	701
2738_SRP100570	BAZ1A k/o, re-expressed	4155.82	0.587552	0.0376859	-15.5908	8.41306e-55	1.57081e-53	14140	4382	4499	757
1647_SRP042158	siPSMD13_DMSO_8hr	5044.79	0.58994	0.0469993	-12.5521	3.87097e-36	1.1103e-34	12567	3668	3636	438
2735_SRP100570	BAZ1A k/o cells with UVC irradiation	3847.28	0.592582	0.0515411	-11.4973	1.36137e-30	2.22991e-29	14670	4414	4583	895
1657_SRP042158	siPSMD13_DMSO_8-12hr	5370.95	0.603963	0.0364505	-16.5694	1.16024e-61	4.08321e-60	12600	4116	4115	357.5
37_SRP065206	Proliferating IMR90 shBrd4	8689.11	0.611572	0.035076	-17.4356	4.42587e-68	4.74966e-66	12235	2731	2750	114
1176_SRP063980	JQ1	7960.96	0.617682	0.0281769	-21.9216	1.61664e-106	8.65028e-105	13701	4342	4408	256
1024_SRP067492	treatment,VK2	31545	0.618225	0.0329251	-18.7767	1.17189e-78	8.24797e-77	15484	3929	3579	220
1648_SRP042158	siPSDM13_DMSO_12hr	5056.86	0.621934	0.0511179	-12.1667	4.67855e-34	1.40816e-32	12554	3579	3553	417
312_SRP095613	treatment,transfected with pooled si-MKL-1 (MRTFA)+si-MKL-2 (MRTFB) + 1µg/ml doxycycline treatment (48 h)	4130.15	0.629442	0.118867	-5.29535	1.18788e-07	1.93883e-06	14584	1823	1655	892
702_SRP034736	cord blood CD34 cells treatment,ERG3 overexpressing	5095.28	0.634026	0.0665214	-9.53115	1.55553e-21	1.60128e-19	14000	1728	1619	136
1224_SRP118788	Hypoxia and PP242	8201.7	0.635693	0.124979	-5.08639	3.64948e-07	1.75056e-05	14169	1147	961	295.5
318_SRP095613	treatment,transfected with si-MKL-2 (MRTFB) + 1µg/ml doxycycline treatment (48 h)	4434.96	0.643956	0.120777	-5.33179	9.72497e-08	1.67713e-06	14632	1729	1547	847
1655_SRP042158	mock_vorinostat_12hr	5072.93	0.645214	0.0511824	-12.6062	1.95251e-36	2.73076e-35	12856	4541	4512	919
2405_SRP073103	treatment,Cells following treatment with Decitabine	7355.31	0.678167	0.0919891	-7.37225	1.67776e-13	9.12966e-12	14710	1881	1672	270
605_SRP093655	TITLE,HUVEC RNY5 Treatment 2 hr replicate 1	5915.53	0.691987	0.0693832	-9.97341	1.99272e-23	5.05922e-22	15347	2465	3221	592
1539_SRP092004	drug,Erlotinib 48hr	3688.56	0.703948	0.0469131	-15.0054	6.77036e-51	9.59205e-50	13519	4355	4370	954
2239_SRP061772	cell type,kidney rhabdoid tumor derived cell line treatment/condition,Doxycycline induced SMARCB1 reexpresion	7541.98	0.71067	0.0386287	-18.3975	1.37689e-75	1.85662e-73	13619	2287	1256	101
26_SRP065206	Quiescent IMR90 JQ1	11571.3	0.717971	0.0541727	-13.2534	4.31299e-40	1.75758e-38	12432	3035	3065	305
2238_SRP061772	cell type,kidney rhabdoid tumor derived cell line treatment/condition,Doxycycline induced SMARCB1 reexpresion	5709	0.720205	0.0313361	-22.9832	6.86192e-117	9.47887e-115	14091	2761	2568	102
306_SRP095613	treatment,transfected with non-targeting control si-RNA + 1µg/ml doxycycline treatment (48 h)	4413.92	0.722014	0.0906686	-7.96322	1.67613e-15	4.0186e-14	14701	2951	2856	612
1537_SRP092004	drug,THZ1 / BGJ398 48hr	3663.64	0.727039	0.0493622	-14.7287	4.22024e-49	7.38704e-48	13655	4282	4357	780
2822_SRP116042	lung cancer cell_SBF2-AS1 siRNA	7333.51	0.727115	0.0731005	-9.94679	2.6046e-23	1.19679e-21	13555	2435	2473	295
3069_SRP062099	treated with,500nM I-BET151	2601.07	0.734692	0.134762	-5.45178	4.98671e-08	1.14201e-06	12275	1371	1799	536
913_SRP097870	SU-DHL4 cells treated with,500 nM BI00923802 for 20hr	656.569	0.734723	0.0918913	-7.99557	1.28976e-15	4.55726e-14	12479	1854	2127	353
2931_SRP071088	source_name,Hepatic stellate cells (HSC) with ceramide treatment	19232	0.736441	0.132753	-5.54747	2.89832e-08	6.18038e-07	14311	1917	1944	645
1963_SRP044917	REC1 cellstreatment,"GSI 72 hrs, wash out 4 hrs"	2136.27	0.738853	0.0571806	-12.9214	3.4085e-38	1.08564e-36	13893	3603	4045	436
3020_SRP062956	GM12878 with IFNa treatment	1273.33	0.754911	0.0837775	-9.0109	2.04381e-19	2.96879e-18	14119	3042	3202	972
1542_SRP092004	drug,Lapatinib 7day	7944.84	0.758213	0.0452719	-16.748	5.85855e-63	1.53573e-61	14000	4664	4726	534
1109_SRP041036	treatment,5.AZA 24hr	1448.87	0.763944	0.106873	-7.14818	8.79359e-13	3.36874e-10	12644	797	988	33
2675_SRP110620	exposure,5 ng/mL TGF-β1	19753.6	0.785949	0.094582	-8.3097	9.59409e-17	2.01985e-15	15484	2283	2221	735
1551_SRP092004	drug,GSK1120212 48hr	10676.1	0.797171	0.0634749	-12.5588	3.55552e-36	5.80168e-35	13325	4275	4090	816
2737_SRP100570	BAZ1A k/o, re-expressed, with UVC	3482.14	0.798388	0.048117	-16.5926	7.87716e-62	2.00747e-60	14154	4741	4715	555
2226_SRP090090	Mon-24h-siPU	2279.45	0.812572	0.135132	-6.01315	1.81949e-09	2.36331e-08	11002	2022	1939	847
747_SRP107198	NCI-H1944 cell drug,pimasertib + SAR405844 100nM	1086.17	0.821135	0.112944	-7.27027	3.58757e-13	3.81187e-11	12665	683	1220	119
1782_SRP076334	treatment,VCR & Cyclo treatment	421.449	0.836071	0.143566	-5.8236	5.75928e-09	4.97057e-07	12826	668	248	131
2644_SRP090658	treatment,NP-siRNA day 14	49130.9	0.836473	0.148435	-5.6353	1.74751e-08	4.43493e-07	14424	2106	1995	568
2648_SRP091857	tumor type,Head and neck squamous cell carcinoma treatment,siKLF5 (siRNA silencing KLF5)	573.644	0.85684	0.0838231	-10.222	1.5804e-24	1.45718e-22	10880	1442	1297	118
2351_SRP059217	treatment,0.2% serum + 20ng/ml PDGF	16281.1	0.863372	0.182251	-4.73728	2.16605e-06	8.9209e-05	15008	1031	740	362
693_SRP102430	iCM treatment,10 nM Endothelin-1 + 10 uM IPA-3	948.487	0.86649	0.115442	-7.50584	6.10365e-14	9.99812e-13	11801	2863	2805	720
772_SRP058771	treatment,"100 nM 1,25(OH)2D3" for 24hr	5013.06	0.866638	0.0773628	-11.2022	3.97524e-29	3.88214e-27	16096	1669	1469	152
2241_SRP061772	cell type,brain rhabdoid tumor derived cell line treatment/condition,Doxycycline induced SMARCB1 reexpresion	5765.56	0.866763	0.031235	-27.7498	1.7534e-169	8.94882e-167	13784	2527	2344	27
2398_SRP098916	treatment,Doxycycline	4750.5	0.875674	0.0532511	-16.4443	9.22173e-61	4.47097e-59	14257	3646	3467	294
1590_SRP050193	JQ1 SUM149 Cells	8838.88	0.875725	0.0451562	-19.3933	8.79797e-84	4.25985e-82	15155	4520	4875	313
750_SRP107198	NCI-H1944 cell drug,pimasertib 100nM	994.246	0.88621	0.100041	-8.85849	8.11032e-19	7.47834e-16	12016	607	779	13
2781_SRP095403	genotype,EZH1 knockout	600.13	0.899644	0.169189	-5.31738	1.05269e-07	2.59913e-06	14666	1841	2184	594
1534_SRP092004	drug,BGJ398 48hr	4074.24	0.901327	0.0559837	-16.0998	2.55901e-58	4.25182e-57	13645	4402	4557	821
20_SRP065206	100nM JQ1 48h	37196.3	0.944916	0.0280449	-33.6929	7.33688e-249	1.06482e-246	12047	3673	3685	83
1107_SRP041036	panobinostat 24hr	1568.58	0.962368	0.170393	-5.64794	1.62387e-08	2.72745e-07	13591	3065	2821	809
962_SRP111173	inactive xpa	3444.65	0.967072	0.0402607	-24.0202	1.70869e-127	1.35556e-125	13330	3970	3840	168
125_SRP029434	shSOX10	18847.5	0.970154	0.174883	-5.54745	2.89869e-08	1.59139e-06	13780	913	518	251
559_SRP076462	treatment,ICG	11124.4	0.97402	0.123764	-7.86999	3.5468e-15	3.05486e-13	14561	1485	1382	169
2916_SRP091854	treatment,Meayamycin	600.978	0.997319	0.207348	-4.80988	1.51018e-06	5.5284e-05	14758	1266	1484	395
3068_SRP062099	treated with,500nM I-BET151 and 5uM SGC0946	2901.68	0.998474	0.1134	-8.80492	1.3095e-18	7.15572e-17	12459	2101	2571	228
2416_SRP068243	cell line,HACAT treatment,Entinostat	9321.22	1.0103	0.0334864	-30.1705	5.76874e-200	6.06646e-198	12412	4734	4513	118
1214_SRP058647	treatment,1uM Retinoic acid	7336.04	1.01151	0.0384466	-26.3095	1.49225e-152	1.92545e-149	13988	1066	847	10
1151_SRP061380	EZH2 knockdown during fluid shear stress	14938.6	1.01302	0.173247	-5.84728	4.99685e-09	1.40007e-07	11742	2012	1629	419
1177_SRP063980	JQ1	7650.31	1.02174	0.0204581	-49.9433	0	0	13570	4963	4956	90
354_SRP070636	4-OHT treatment	70068.8	1.03302	0.158588	-6.51385	7.32495e-11	3.58023e-09	13930	1090	1202	285
92_SRP065305	MCF10A/PHF8-TGFβ1-48hr rep2	6747.87	1.05236	0.23353	-4.50632	6.59618e-06	0.000230848	12494	675	525	357
2399_SRP098916	treatment,Doxycycline + E2	5048.49	1.06125	0.0653427	-16.2413	2.57429e-59	1.30157e-57	14260	3965	3674	282
2988_ERP018533	THP1 growth condition,vitamin D3 and lipopolyssacharide	24995	1.06772	0.0860806	-12.4037	2.4938e-35	1.09603e-33	14108	2667	2147	321
751_SRP107198	NCI-H1944 cell drug,pimasertib 1000nM	881.836	1.09387	0.126865	-8.6223	6.56229e-18	3.74363e-15	11998	946	1102	21
2237_SRP061772	cell type,retroperitoneum rhabdoid tumor derived cell line treatment/condition,Doxycycline induced SMARCB1 reexpresion	9118.29	1.10063	0.0301001	-36.5657	1.00414e-292	8.90734e-290	14198	3052	2988	16
794_SRP074134	MV411 cells treatment,shENL Knock Down	11439.6	1.10723	0.149427	-7.4098	1.26486e-13	3.92691e-12	14033	2458	2632	451.5
982_SRP090830	ASCL1 k/o	9750.84	1.10782	0.0593817	-18.6559	1.12988e-77	4.57971e-76	14308	4669	4498	353
1646_SRP042158	siPSMD13_vorinostat_12hr	5828.11	1.132	0.0597611	-18.942	5.13729e-80	1.21079e-78	12895	4930	4935	547
2236_SRP061772	cell type,liver rhabdoid tumor derived cell line treatment/condition,Doxycycline induced SMARCB1 reexpresion	4727.67	1.15899	0.0355599	-32.5925	5.23473e-233	5.63539e-230	13997	2489	2189	13
88_SRP065305	MCF10A/Mock-TGFβ1-24hr	6082.83	1.15982	0.229473	-5.05426	4.32054e-07	1.34312e-05	12528	1197	806	402
1812_SRP087439	Dox + Dox inducible FLAG-Omomyc	6784.08	1.17268	0.209965	-5.58512	2.33536e-08	7.70447e-07	15206	2469	2476	458
2225_SRP090090	HL60-siPU1	1852.06	1.17637	0.117935	-9.97473	1.96634e-23	4.65129e-22	11094	2461	2454	469
90_SRP065305	MCF10A/Mock-TGFβ1-72hr	6514.19	1.18528	0.205885	-5.75699	8.56283e-09	2.91716e-07	12571	1188	909	369
2933_SRP071088	source_name,Hepatic stellate cells (HSC) with Nortriptyline and TGF-beta treatment	26521.7	1.21607	0.123087	-9.87977	5.09516e-23	2.59781e-21	14483	2137	2613	284
1193_SRP082423	treatment,AZD5153	3454.35	1.23828	0.171967	-7.20067	5.99188e-13	3.00186e-11	12174	1779	2048	243
914_SRP097870	SU-DHL4 cells treated with,500 nM BI00923802 for 168hr	1211.69	1.23864	0.0750769	-16.4982	3.7787e-61	5.48868e-60	13197	4602	4871	908
1213_SRP058647	treatment,1uM Retinoic acid	8501.69	1.24844	0.0335885	-37.1686	2.19772e-302	1.61174e-299	13934	1375	1243	19
2816_SRP051595	HCC364 cells, infected with shRNA against YAP1 & treated with PLX4720	14984	1.27339	0.243026	-5.23975	1.6079e-07	3.22912e-06	13372	1494	1815	640
1771_SRP066171	K562 treated with,1 μM SAHA	5086.2	1.27908	0.248907	-5.13879	2.7651e-07	1.00296e-05	15599	2244	1494	430
1495_SRP095402	treatment,Stimulated with 100 microM Pervanadate	6882.41	1.28075	0.113929	-11.2417	2.54556e-29	6.02868e-28	13911	4137	4053	587
89_SRP065305	MCF10A/Mock-TGFβ1-48hr	6568.62	1.30244	0.230057	-5.66139	1.50152e-08	6.68122e-07	12548	1070	690	281
1198_SRP082423	treatment,AZD5153	2091.11	1.31804	0.228563	-5.76661	8.08821e-09	1.86819e-07	12288	1769	2055	532
2896_SRP091854	treatment,DRB	556.519	1.32238	0.287007	-4.60747	4.07603e-06	8.97492e-05	14667	1574	1890	639.5
1414_SRP079914	treatment,1μM Doxorubicin for 8 hours	10917	1.32701	0.228816	-5.79946	6.65291e-09	1.57235e-07	14204	1894	2753	601
297_SRP075592	MDA-MB-468, EGF, 7 d treatment	24794.5	1.33996	0.103246	-12.9784	1.6226e-38	1.00276e-36	16697	3253	3053	270
1212_SRP049756	treatment,siMBD2	29586.2	1.36352	0.0522687	-26.0868	5.14153e-150	2.4137e-147	14553	4760	4807	31
1770_SRP066171	K562 treated with,0.5 mM NaBut	6268.36	1.36933	0.123971	-11.0456	2.3027e-28	2.57604e-26	15555	3255	2784	139
1174_SRP063980	JQ1	57294.2	1.37437	0.0145907	-94.1952	0	0	13521	4777	4935	73
1194_SRP082423	treatment,AZD5153	3726.68	1.38	0.197105	-7.00135	2.53508e-12	4.15045e-11	13245	2729	3177	809
296_SRP075592	MDA-MB-468, Hypoxia, 7 d treatment	25988	1.4365	0.0813666	-17.6546	9.3736e-70	8.84941e-68	16913	3844	3696	179
790_SRP071170	CD4+CD25- T cells treatment,10 ng/ml IL-6	1141.17	1.45434	0.144999	-10.03	1.12494e-23	4.2599e-22	13751	3914	4165	363
947_SRP098688	DNMT1a and DNMT3b double-knockout during EGF treatment conditions	5168.17	1.46672	0.090347	-16.2342	2.88757e-59	4.08109e-57	15688	4292	3647	111
945_SRP098688	DNMT1a and DNMT3b double-knockout during starvation conditions	5712.79	1.46799	0.0526367	-27.8891	3.61298e-171	1.02415e-168	15874	4932	4548	56
588_SRP061881	JIA patient, JQ1	2148.54	1.47125	0.268756	-5.47428	4.39287e-08	9.25954e-06	11807	233	253	56
2227_SRP090090	Mac-24h-siPU	4886.97	1.47532	0.0939598	-15.7016	1.47407e-55	7.11768e-54	11154	2607	2527	231
1767_SRP066171	K562 genotype/variation,PU.1 shRNA; PU.1 depletion treated with,1 μM SAHA	6090.73	1.49808	0.151954	-9.85873	6.28418e-23	1.05173e-20	15741	3753	3688	94
2817_SRP051595	HCC364 cells, infected with shRNA against YAP1 & treated with Trametinib	12582.6	1.53889	0.319627	-4.81463	1.47476e-06	3.27808e-05	13089	1137	1309	566
1772_SRP066171	K562 treated with,1 μM SAHA	6991.81	1.55348	0.206056	-7.53915	4.73045e-14	2.34332e-12	16064	3123	2817	324
146_SRP065678	drug treatment,Serum-starved	39584.4	1.56461	0.0556033	-28.1388	3.28221e-174	2.88998e-172	14090	4790	4767	160
2845_SRP095644	treatment,LBH589 (10nM) for 96hr	10931.5	1.56732	0.0724	-21.6481	6.32925e-104	1.14979e-101	13447	4907	4720	73.5
1171_SRP035864	treatment,UVB in skin cells	6309.4	1.60125	0.147544	-10.8527	1.93632e-27	8.4144e-25	15727	2008	1898	36
1106_SRP041036	NMP treatment 24hr	2210.01	1.62774	0.205955	-7.90337	2.71468e-15	1.25042e-13	12759	3149	3356	277
350_SRP113250	largazole_30nMto75nM	5396.92	1.64202	0.180093	-9.11764	7.67786e-20	1.22508e-17	13403	2298	2402	84
604_SRP093655	TITLE,HUVEC RNY5 Treatment 24 hr replicate 2	9303.25	1.73883	0.0755513	-23.0152	3.28377e-117	3.11453e-115	15108	3841	3999	156
351_SRP113250	largazole_150nMto300nM	5454.14	1.75933	0.102883	-17.1003	1.47712e-65	3.9637e-63	13417	2985	3027	50
1108_SRP041036	panobinostat+5-Azacytidine 24hr	2319.36	1.80518	0.173984	-10.3755	3.20454e-25	4.50398e-22	14079	2690	1625	10
1766_SRP066171	K562 treated with,1 μM SAHA	7736.55	1.91325	0.114833	-16.6611	2.51204e-62	5.90592e-60	15754	3652	3876	67
589_SRP061881	JQ1, healthy control	1887.27	1.95941	0.365477	-5.36125	8.26483e-08	9.08489e-06	11787	316	421	103
2503_SRP058804	Gata6 overexpressing hESC line1 in KSR media	4392.79	2.14522	0.30123	-7.12155	1.06723e-12	3.83722e-11	15964	2247	1451	444
879_SRP095523	treatment,PAM	1704.09	2.20102	0.0489376	-44.976	0	0	10041	2879	2651	18
1196_SRP082423	treatment,AZD5153	3166.04	2.20638	0.112875	-19.5471	4.367e-85	1.78737e-82	12688	3434	3761	31
2936_SRP103305	U937 cell line treated with PMA for 96 hrs	40752.5	2.4896	0.336662	-7.39494	1.41473e-13	3.31258e-12	16974	2891	3038	723
1516_SRP075717	treatment,pCDH Backbone 5 days	31046.6	2.51534	0.404107	-6.22443	4.8331e-10	1.50315e-08	22021	3771	3991	692
2504_SRP058804	Gata6 overexpressing hESC line1 in mTeSR media	3670.14	2.57998	0.375639	-6.86825	6.49938e-12	3.04359e-10	16156	2056	1351	345
2987_ERP018533	THP1 growth condition,phorbol myristate acetate only	53883.5	2.58318	0.0871361	-29.6454	3.89038e-193	7.37773e-191	14223	4139	3612	75
1515_SRP075717	treatment,pCDH BCR-ABL	32355.1	2.62126	0.42941	-6.10433	1.0323e-09	4.82831e-08	22035	3268	3504	461
1170_SRP033401	treatment,tamoxifen in IMR90 cells	28030.1	2.74088	0.0343373	-79.8223	0	0	13481	4470	4121	63
1851_SRP075776	culture medium,"DMEMF12, 5% Horse Serum, 20 ng/mL EGF, 0.5 mg/mL Hydrocortisone, 100 ng/mL Cholera Toxin, 10 mg/ml Insulin, Pen/Strep"	2982.16	2.90356	0.17328	-16.7565	5.07658e-63	2.00207e-61	12904	4112	4054	327
2982_ERP018533	U937 growth condition,phorbol myristate acetate	53822.2	2.98363	0.148035	-20.1549	2.43603e-90	3.67594e-88	13430	4334	4000	89
2986_ERP018533	THP1 growth condition,phorbol myristate acetate and lipopolysaccharide	89461.1	3.48531	0.0994192	-35.0567	3.08571e-269	3.96265e-267	14383	4551	4075	112
2780_SRP095403	genotype,EZH1 and EZH2 knockout	3930.07	4.05226	0.271398	-14.9311	2.06923e-50	6.3179e-48	15877	3753	3152	52
2782_SRP095403	genotype,EED knockout	4856.56	4.51342	0.170222	-26.5149	6.5283e-155	9.26307e-152	15608	4981	4627	11

## Sheet: Case control assignments
SRP ID	SRS sample	Case or control assignment
1468_SRP100936	SRS2016362	control
1468_SRP100936	SRS2016368	case
1468_SRP100936	SRS2016363	control
1468_SRP100936	SRS2016361	control
1468_SRP100936	SRS2016369	case
1468_SRP100936	SRS2016367	case
578_DRP002315	DRS016172	control
578_DRP002315	DRS016174	case
578_DRP002315	DRS016173	control
578_DRP002315	DRS016177	control
3032_SRP056200	SRS874702	case
3032_SRP056200	SRS874701	control
3032_SRP056200	SRS874710	control
3032_SRP056200	SRS874708	control
3032_SRP056200	SRS874703	case
1016_SRP068450	SRS1248064	case
1016_SRP068450	SRS1248065	case
1016_SRP068450	SRS1248066	control
1017_SRP068450	SRS1248063	case
1017_SRP068450	SRS1248064	case
1017_SRP068450	SRS1248066	control
2696_SRP072038	SRS1349869	control
2696_SRP072038	SRS1349874	control
2696_SRP072038	SRS1349862	case
2696_SRP072038	SRS1349882	control
2_SRP010350	SRS287176	control
2_SRP010350	SRS287179	case
2_SRP010350	SRS287177	control
2_SRP010350	SRS287175	control
2_SRP010350	SRS287178	case
2_SRP010350	SRS287180	case
3_SRP010350	SRS287176	control
3_SRP010350	SRS287177	control
3_SRP010350	SRS287183	case
3_SRP010350	SRS287175	control
3_SRP010350	SRS287181	case
3_SRP010350	SRS287182	case
1928_SRP044298	SRS659665	case
1928_SRP044298	SRS659657	control
1928_SRP044298	SRS659664	case
1928_SRP044298	SRS659656	control
3033_SRP056200	SRS874709	case
3033_SRP056200	SRS874701	control
3033_SRP056200	SRS874710	control
3033_SRP056200	SRS874706	case
3033_SRP056200	SRS874707	case
3033_SRP056200	SRS874708	control
2695_SRP072038	SRS1349869	control
2695_SRP072038	SRS1349865	case
2695_SRP072038	SRS1349874	control
2695_SRP072038	SRS1349882	control
2681_SRP072038	SRS1349878	control
2681_SRP072038	SRS1349877	case
2681_SRP072038	SRS1349884	control
2681_SRP072038	SRS1349876	control
2809_ERP013870	ERS1033557	control
2809_ERP013870	ERS1033555	case
2809_ERP013870	ERS1033558	control
2809_ERP013870	ERS1033554	case
2809_ERP013870	ERS1033559	control
2809_ERP013870	ERS1033556	case
1298_SRP056084	SRS872340	control
1298_SRP056084	SRS872342	case
1298_SRP056084	SRS872341	control
1298_SRP056084	SRS872338	case
251_SRP090891	SRS1730262	control
251_SRP090891	SRS1730265	case
251_SRP090891	SRS1730266	case
251_SRP090891	SRS1730261	control
1860_SRP064458	SRS1098774	control
1860_SRP064458	SRS1098759	case
1860_SRP064458	SRS1098769	control
1860_SRP064458	SRS1098770	control
1860_SRP064458	SRS1098760	case
1860_SRP064458	SRS1098773	control
1860_SRP064458	SRS1098776	control
1860_SRP064458	SRS1098775	control
1680_SRP064418	SRS1097849	control
1680_SRP064418	SRS1097835	case
1680_SRP064418	SRS1097834	case
1680_SRP064418	SRS1097848	control
2775_SRP049988	SRS746064	control
2775_SRP049988	SRS746077	case
2775_SRP049988	SRS746070	case
2775_SRP049988	SRS746062	control
2775_SRP049988	SRS746069	case
2775_SRP049988	SRS746068	case
2775_SRP049988	SRS746056	control
2775_SRP049988	SRS746075	case
2775_SRP049988	SRS746058	control
2775_SRP049988	SRS746073	case
2775_SRP049988	SRS746066	control
2775_SRP049988	SRS746074	case
2775_SRP049988	SRS746063	control
2775_SRP049988	SRS746059	control
2775_SRP049988	SRS746057	control
2775_SRP049988	SRS746072	case
2775_SRP049988	SRS746061	control
2775_SRP049988	SRS746067	case
2775_SRP049988	SRS746078	case
2775_SRP049988	SRS746060	control
2775_SRP049988	SRS746071	case
2775_SRP049988	SRS746065	control
2775_SRP049988	SRS746076	case
250_SRP090891	SRS1730262	control
250_SRP090891	SRS1730264	case
250_SRP090891	SRS1730261	control
250_SRP090891	SRS1730263	case
22_SRP065206	SRS1130974	control
22_SRP065206	SRS1130932	case
22_SRP065206	SRS1130936	case
22_SRP065206	SRS1130972	control
22_SRP065206	SRS1130969	control
22_SRP065206	SRS1130930	case
2125_SRP069960	SRS1322593	control
2125_SRP069960	SRS1322589	case
2125_SRP069960	SRS1322592	control
2125_SRP069960	SRS1322596	control
2125_SRP069960	SRS1322619	case
2125_SRP069960	SRS1322590	case
2125_SRP069960	SRS1322594	control
2125_SRP069960	SRS1322591	case
127_SRP051772	SRS811062	control
127_SRP051772	SRS811061	control
127_SRP051772	SRS811064	case
127_SRP051772	SRS811065	case
127_SRP051772	SRS811063	control
127_SRP051772	SRS811066	case
1683_SRP064418	SRS1097833	case
1683_SRP064418	SRS1097849	control
1683_SRP064418	SRS1097832	case
1683_SRP064418	SRS1097848	control
1859_SRP064458	SRS1098774	control
1859_SRP064458	SRS1098768	case
1859_SRP064458	SRS1098769	control
1859_SRP064458	SRS1098770	control
1859_SRP064458	SRS1098773	control
1859_SRP064458	SRS1098776	control
1859_SRP064458	SRS1098767	case
1859_SRP064458	SRS1098775	control
2240_SRP061772	SRS1016302	case
2240_SRP061772	SRS1016304	control
2240_SRP061772	SRS1016300	case
2240_SRP061772	SRS1016301	case
2240_SRP061772	SRS1016303	control
2240_SRP061772	SRS1016305	control
1686_SRP064418	SRS1097847	control
1686_SRP064418	SRS1097835	case
1686_SRP064418	SRS1097846	control
1686_SRP064418	SRS1097834	case
591_SRP013773	SRS346192	control
591_SRP013773	SRS346191	control
591_SRP013773	SRS346195	case
591_SRP013773	SRS346196	case
2448_SRP055981	SRS866400	case
2448_SRP055981	SRS866405	control
2448_SRP055981	SRS866399	control
2448_SRP055981	SRS866693	case
2448_SRP055981	SRS866691	case
24_SRP065206	SRS1130974	control
24_SRP065206	SRS1130940	case
24_SRP065206	SRS1130972	control
24_SRP065206	SRS1130969	control
24_SRP065206	SRS1130939	case
24_SRP065206	SRS1130942	case
2650_SRP091857	SRS2517099	case
2650_SRP091857	SRS2517097	control
2650_SRP091857	SRS2517096	control
2650_SRP091857	SRS2517098	case
1681_SRP064418	SRS1097849	control
1681_SRP064418	SRS1097838	case
1681_SRP064418	SRS1097839	case
1681_SRP064418	SRS1097848	control
1679_SRP064418	SRS1097849	control
1679_SRP064418	SRS1097842	case
1679_SRP064418	SRS1097843	case
1679_SRP064418	SRS1097848	control
23_SRP065206	SRS1130974	control
23_SRP065206	SRS1130963	case
23_SRP065206	SRS1130962	case
23_SRP065206	SRS1130972	control
23_SRP065206	SRS1130969	control
23_SRP065206	SRS1130964	case
2179_SRP093727	SRS1804497	case
2179_SRP093727	SRS1804510	control
2179_SRP093727	SRS1804484	control
2179_SRP093727	SRS1804493	control
2179_SRP093727	SRS1804509	control
2179_SRP093727	SRS1804501	case
2179_SRP093727	SRS1804511	control
2179_SRP093727	SRS1804508	control
2179_SRP093727	SRS1804498	case
2179_SRP093727	SRS1804499	case
2179_SRP093727	SRS1804485	control
2179_SRP093727	SRS1804500	case
2179_SRP093727	SRS1804492	control
1357_SRP112723	SRS2363617	case
1357_SRP112723	SRS2363613	control
1357_SRP112723	SRS2363612	control
1357_SRP112723	SRS2363616	case
1357_SRP112723	SRS2363614	case
1357_SRP112723	SRS2363615	control
1231_SRP066865	SRS1185557	case
1231_SRP066865	SRS1185564	control
1231_SRP066865	SRS1185561	control
1231_SRP066865	SRS1185562	control
1231_SRP066865	SRS1185563	control
1231_SRP066865	SRS1185560	case
1231_SRP066865	SRS1185559	case
1231_SRP066865	SRS1185558	case
2939_SRP017788	SRS383513	case
2939_SRP017788	SRS383508	control
2939_SRP017788	SRS383512	case
2939_SRP017788	SRS383509	control
1806_SRP038101	SRS559064	control
1806_SRP038101	SRS559069	case
1806_SRP038101	SRS559067	case
1806_SRP038101	SRS559065	control
1806_SRP038101	SRS559066	control
1806_SRP038101	SRS559068	case
2394_SRP098916	SRS1959622	case
2394_SRP098916	SRS1959615	control
2394_SRP098916	SRS1959618	case
2394_SRP098916	SRS1959613	control
2394_SRP098916	SRS1959614	control
2394_SRP098916	SRS1959619	case
2649_SRP091857	SRS2517095	case
2649_SRP091857	SRS2517097	control
2649_SRP091857	SRS2517096	control
2649_SRP091857	SRS2517094	case
27_SRP065206	SRS1130956	case
27_SRP065206	SRS1130959	case
27_SRP065206	SRS1130973	control
27_SRP065206	SRS1130970	control
27_SRP065206	SRS1130957	case
27_SRP065206	SRS1130971	control
980_SRP090830	SRS1727604	control
980_SRP090830	SRS1727602	control
980_SRP090830	SRS1727606	case
980_SRP090830	SRS1727607	case
980_SRP090830	SRS1727605	case
980_SRP090830	SRS1727603	control
1232_SRP066865	SRS1185552	case
1232_SRP066865	SRS1185566	case
1232_SRP066865	SRS1185553	control
1232_SRP066865	SRS1185565	case
1232_SRP066865	SRS1185555	control
1232_SRP066865	SRS1185551	case
1232_SRP066865	SRS1185556	control
1232_SRP066865	SRS1185554	control
1356_SRP112723	SRS2363610	case
1356_SRP112723	SRS2363611	case
1356_SRP112723	SRS2363609	control
1356_SRP112723	SRS2363607	control
1356_SRP112723	SRS2363606	control
1356_SRP112723	SRS2363608	case
1879_SRP044854	SRS666451	control
1879_SRP044854	SRS666439	control
1879_SRP044854	SRS666443	control
1879_SRP044854	SRS666459	control
1879_SRP044854	SRS666447	control
1879_SRP044854	SRS666452	case
1879_SRP044854	SRS666457	case
1879_SRP044854	SRS666458	control
1879_SRP044854	SRS666448	case
1879_SRP044854	SRS666460	case
1879_SRP044854	SRS666440	case
1879_SRP044854	SRS666444	case
1880_SRP044854	SRS666451	control
1880_SRP044854	SRS666446	case
1880_SRP044854	SRS666439	control
1880_SRP044854	SRS666453	case
1880_SRP044854	SRS666443	control
1880_SRP044854	SRS666459	control
1880_SRP044854	SRS666441	case
1880_SRP044854	SRS666450	case
1880_SRP044854	SRS666447	control
1880_SRP044854	SRS666458	control
1880_SRP044854	SRS666456	case
1880_SRP044854	SRS666462	case
170_SRP057571	SRS918161	control
170_SRP057571	SRS918168	case
170_SRP057571	SRS918162	control
170_SRP057571	SRS918158	control
170_SRP057571	SRS918172	case
170_SRP057571	SRS918169	case
519_SRP066365	SRS1167798	case
519_SRP066365	SRS1167800	control
519_SRP066365	SRS1167801	control
519_SRP066365	SRS1167803	control
519_SRP066365	SRS1167802	case
519_SRP066365	SRS1167799	case
424_SRP049436	SRS734625	control
424_SRP049436	SRS734628	case
424_SRP049436	SRS734627	case
424_SRP049436	SRS734626	case
424_SRP049436	SRS734623	control
424_SRP049436	SRS734624	control
35_SRP065206	SRS1130966	case
35_SRP065206	SRS1130975	control
35_SRP065206	SRS1130977	control
35_SRP065206	SRS1130978	control
35_SRP065206	SRS1130968	case
35_SRP065206	SRS1130909	case
2496_SRP055454	SRS856666	case
2496_SRP055454	SRS856655	control
2496_SRP055454	SRS856654	control
2496_SRP055454	SRS856663	case
2496_SRP055454	SRS856662	case
2496_SRP055454	SRS853434	control
422_SRP049436	SRS734640	case
422_SRP049436	SRS734636	control
422_SRP049436	SRS734638	case
422_SRP049436	SRS734635	control
422_SRP049436	SRS734639	case
422_SRP049436	SRS734637	control
1421_SRP078414	SRS1559745	control
1421_SRP078414	SRS1559743	case
1421_SRP078414	SRS1559741	case
1421_SRP078414	SRS1559744	control
1421_SRP078414	SRS1559746	control
1421_SRP078414	SRS1559742	case
25_SRP065206	SRS1130974	control
25_SRP065206	SRS1130949	case
25_SRP065206	SRS1130908	case
25_SRP065206	SRS1130972	control
25_SRP065206	SRS1130969	control
25_SRP065206	SRS1130948	case
2422_SRP111577	SRS2347681	control
2422_SRP111577	SRS2347682	case
2422_SRP111577	SRS2347680	control
2422_SRP111577	SRS2347683	case
2449_SRP062773	SRS1044104	control
2449_SRP062773	SRS1044100	case
2449_SRP062773	SRS1044102	case
2449_SRP062773	SRS1044103	control
1745_SRP110615	SRS2318455	case
1745_SRP110615	SRS2318450	control
1745_SRP110615	SRS2318452	control
1745_SRP110615	SRS2318458	case
1745_SRP110615	SRS2318449	control
1745_SRP110615	SRS2318454	case
1745_SRP110615	SRS2318453	control
1745_SRP110615	SRS2318456	case
1745_SRP110615	SRS2318451	control
1745_SRP110615	SRS2318457	case
903_SRP076286	SRS1491950	control
903_SRP076286	SRS1491953	case
903_SRP076286	SRS1491954	control
903_SRP076286	SRS1491951	case
903_SRP076286	SRS1491952	control
903_SRP076286	SRS1491955	case
1871_SRP081918	SRS1615559	control
1871_SRP081918	SRS1615562	case
1871_SRP081918	SRS1615563	case
1871_SRP081918	SRS1615561	control
1871_SRP081918	SRS1615560	control
1871_SRP081918	SRS1615564	case
1865_SRP056665	SRS887026	case
1865_SRP056665	SRS887020	control
1865_SRP056665	SRS887025	case
1865_SRP056665	SRS886993	control
1865_SRP056665	SRS886985	control
1865_SRP056665	SRS887027	case
2476_SRP064747	SRS1112780	control
2476_SRP064747	SRS1112786	case
2476_SRP064747	SRS1112776	case
2476_SRP064747	SRS1112802	case
2476_SRP064747	SRS1112806	control
2476_SRP064747	SRS1112790	control
1588_SRP050193	SRS751153	case
1588_SRP050193	SRS751148	control
1588_SRP050193	SRS751147	control
1588_SRP050193	SRS751154	case
189_SRP076716	SRS1510239	control
189_SRP076716	SRS1510242	case
189_SRP076716	SRS1510236	control
189_SRP076716	SRS1510243	case
189_SRP076716	SRS1510238	control
189_SRP076716	SRS1510237	control
189_SRP076716	SRS1510235	case
189_SRP076716	SRS1510234	control
189_SRP076716	SRS1510240	case
189_SRP076716	SRS1510241	case
1179_SRP063980	SRS1079475	case
1179_SRP063980	SRS1079479	control
1179_SRP063980	SRS1079478	control
1179_SRP063980	SRS1079476	case
1179_SRP063980	SRS1079480	control
1179_SRP063980	SRS1079477	case
1545_SRP092004	SRS1757875	case
1545_SRP092004	SRS1757867	control
1545_SRP092004	SRS1757866	control
1545_SRP092004	SRS1757878	case
1545_SRP092004	SRS1757876	case
1545_SRP092004	SRS1757868	control
2595_SRP071942	SRS1346611	control
2595_SRP071942	SRS1346613	control
2595_SRP071942	SRS1346610	case
2595_SRP071942	SRS1346612	case
896_SRP023199	SRS429804	case
896_SRP023199	SRS429802	case
896_SRP023199	SRS429803	case
896_SRP023199	SRS429801	control
896_SRP023199	SRS429800	control
896_SRP023199	SRS429805	control
510_SRP074154	SRS1417038	control
510_SRP074154	SRS1417040	case
510_SRP074154	SRS1417036	control
510_SRP074154	SRS1417045	case
510_SRP074154	SRS1417039	control
510_SRP074154	SRS1417041	case
510_SRP074154	SRS1417042	case
510_SRP074154	SRS1417037	control
2979_SRP076175	SRS1486561	case
2979_SRP076175	SRS1486563	case
2979_SRP076175	SRS1486548	control
2979_SRP076175	SRS1486565	case
2979_SRP076175	SRS1486551	control
2979_SRP076175	SRS1486549	control
2979_SRP076175	SRS1486566	case
2979_SRP076175	SRS1486550	control
2979_SRP076175	SRS1486564	case
2979_SRP076175	SRS1486546	control
2979_SRP076175	SRS1486562	case
2979_SRP076175	SRS1486547	control
162_SRP059701	SRS967028	control
162_SRP059701	SRS967022	case
162_SRP059701	SRS967021	case
162_SRP059701	SRS967027	control
1370_SRP109645	SRS2295403	control
1370_SRP109645	SRS2295404	case
1370_SRP109645	SRS2295391	control
1370_SRP109645	SRS2295401	control
1370_SRP109645	SRS2295399	control
1370_SRP109645	SRS2295406	case
1370_SRP109645	SRS2295390	control
1370_SRP109645	SRS2295405	case
1370_SRP109645	SRS2295392	control
423_SRP049436	SRS734636	control
423_SRP049436	SRS734642	case
423_SRP049436	SRS734635	control
423_SRP049436	SRS734641	case
423_SRP049436	SRS734643	case
423_SRP049436	SRS734637	control
1420_SRP097129	SRS1926278	control
1420_SRP097129	SRS1926277	control
1420_SRP097129	SRS1926279	case
1420_SRP097129	SRS1926280	case
2469_SRP100068	SRS1983790	control
2469_SRP100068	SRS1983791	control
2469_SRP100068	SRS1983794	case
2469_SRP100068	SRS1983795	case
2469_SRP100068	SRS1983793	case
2469_SRP100068	SRS1983792	control
983_SRP062332	SRS1029871	case
983_SRP062332	SRS1029870	case
983_SRP062332	SRS1029872	control
983_SRP062332	SRS1029876	control
983_SRP062332	SRS1029875	control
983_SRP062332	SRS1029873	control
983_SRP062332	SRS1029874	case
983_SRP062332	SRS1029869	case
1408_SRP092535	SRS1779704	case
1408_SRP092535	SRS1779708	control
1408_SRP092535	SRS1779706	case
1408_SRP092535	SRS1779707	control
2738_SRP100570	SRS1996913	control
2738_SRP100570	SRS1996918	case
2738_SRP100570	SRS1996909	case
2738_SRP100570	SRS1996925	control
2738_SRP100570	SRS1996920	case
2738_SRP100570	SRS1996919	control
1647_SRP042158	SRS616813	control
1647_SRP042158	SRS616823	case
1647_SRP042158	SRS616800	control
1647_SRP042158	SRS616828	control
1647_SRP042158	SRS616815	control
1647_SRP042158	SRS616799	control
1647_SRP042158	SRS616809	case
1647_SRP042158	SRS616801	control
1647_SRP042158	SRS616827	control
1647_SRP042158	SRS616829	control
1647_SRP042158	SRS616837	case
1647_SRP042158	SRS616814	control
2735_SRP100570	SRS1996903	case
2735_SRP100570	SRS1996917	case
2735_SRP100570	SRS1996913	control
2735_SRP100570	SRS1996925	control
2735_SRP100570	SRS1996919	control
2735_SRP100570	SRS1996914	case
1657_SRP042158	SRS616813	control
1657_SRP042158	SRS616823	case
1657_SRP042158	SRS616800	control
1657_SRP042158	SRS616828	control
1657_SRP042158	SRS616815	control
1657_SRP042158	SRS616838	case
1657_SRP042158	SRS616810	case
1657_SRP042158	SRS616799	control
1657_SRP042158	SRS616809	case
1657_SRP042158	SRS616801	control
1657_SRP042158	SRS616827	control
1657_SRP042158	SRS616829	control
1657_SRP042158	SRS616837	case
1657_SRP042158	SRS616824	case
1657_SRP042158	SRS616814	control
37_SRP065206	SRS1130955	case
37_SRP065206	SRS1130975	control
37_SRP065206	SRS1130977	control
37_SRP065206	SRS1130953	case
37_SRP065206	SRS1130978	control
37_SRP065206	SRS1130911	case
1176_SRP063980	SRS1079486	control
1176_SRP063980	SRS1079484	case
1176_SRP063980	SRS1079485	control
1176_SRP063980	SRS1079481	case
1176_SRP063980	SRS1079482	case
1176_SRP063980	SRS1079487	control
1024_SRP067492	SRS1210880	control
1024_SRP067492	SRS1210875	case
1024_SRP067492	SRS1210879	control
1024_SRP067492	SRS1210876	case
1648_SRP042158	SRS616813	control
1648_SRP042158	SRS616800	control
1648_SRP042158	SRS616828	control
1648_SRP042158	SRS616815	control
1648_SRP042158	SRS616838	case
1648_SRP042158	SRS616810	case
1648_SRP042158	SRS616799	control
1648_SRP042158	SRS616801	control
1648_SRP042158	SRS616827	control
1648_SRP042158	SRS616829	control
1648_SRP042158	SRS616824	case
1648_SRP042158	SRS616814	control
312_SRP095613	SRS1874588	control
312_SRP095613	SRS1874568	case
312_SRP095613	SRS1874561	control
312_SRP095613	SRS1874576	case
312_SRP095613	SRS1874592	control
312_SRP095613	SRS1874569	control
702_SRP034736	SRS1115823	case
702_SRP034736	SRS1115825	control
702_SRP034736	SRS1115829	case
702_SRP034736	SRS1115826	control
702_SRP034736	SRS1115830	control
702_SRP034736	SRS1115832	control
1224_SRP118788	SRS2535717	case
1224_SRP118788	SRS2535709	case
1224_SRP118788	SRS2535714	control
1224_SRP118788	SRS2535706	control
318_SRP095613	SRS1874588	control
318_SRP095613	SRS1874567	case
318_SRP095613	SRS1874561	control
318_SRP095613	SRS1874592	control
318_SRP095613	SRS1874575	case
318_SRP095613	SRS1874569	control
1655_SRP042158	SRS616813	control
1655_SRP042158	SRS616804	case
1655_SRP042158	SRS616818	case
1655_SRP042158	SRS616800	control
1655_SRP042158	SRS616828	control
1655_SRP042158	SRS616815	control
1655_SRP042158	SRS616799	control
1655_SRP042158	SRS616801	control
1655_SRP042158	SRS616827	control
1655_SRP042158	SRS616829	control
1655_SRP042158	SRS616832	case
1655_SRP042158	SRS616814	control
2405_SRP073103	SRS1384175	case
2405_SRP073103	SRS1384178	control
2405_SRP073103	SRS1384177	control
2405_SRP073103	SRS1384176	case
605_SRP093655	SRS1803332	case
605_SRP093655	SRS1803327	control
605_SRP093655	SRS1803328	control
605_SRP093655	SRS1803325	control
605_SRP093655	SRS1803324	control
605_SRP093655	SRS1803331	case
1539_SRP092004	SRS1757885	case
1539_SRP092004	SRS1757882	case
1539_SRP092004	SRS1757884	control
1539_SRP092004	SRS1757881	control
1539_SRP092004	SRS1757886	case
1539_SRP092004	SRS1757883	control
2239_SRP061772	SRS1016309	control
2239_SRP061772	SRS1016306	case
2239_SRP061772	SRS1016308	control
2239_SRP061772	SRS1016307	case
26_SRP065206	SRS1130927	control
26_SRP065206	SRS1130923	control
26_SRP065206	SRS1130918	case
26_SRP065206	SRS1130914	case
26_SRP065206	SRS1130926	control
26_SRP065206	SRS1130915	case
2238_SRP061772	SRS1016328	case
2238_SRP061772	SRS1016324	control
2238_SRP061772	SRS1016326	case
2238_SRP061772	SRS1016322	control
2238_SRP061772	SRS1016325	case
2238_SRP061772	SRS1016323	control
306_SRP095613	SRS1874565	case
306_SRP095613	SRS1874590	case
306_SRP095613	SRS1874588	control
306_SRP095613	SRS1874586	case
306_SRP095613	SRS1874561	control
306_SRP095613	SRS1874573	case
306_SRP095613	SRS1874592	control
306_SRP095613	SRS1874569	control
1537_SRP092004	SRS1757896	case
1537_SRP092004	SRS1757897	case
1537_SRP092004	SRS1757899	control
1537_SRP092004	SRS1757900	control
1537_SRP092004	SRS1757901	control
1537_SRP092004	SRS1757898	case
2822_SRP116042	SRS2456232	control
2822_SRP116042	SRS2456235	case
2822_SRP116042	SRS2456233	control
2822_SRP116042	SRS2456234	case
3069_SRP062099	SRS1026788	case
3069_SRP062099	SRS1026787	case
3069_SRP062099	SRS1026790	control
3069_SRP062099	SRS1026789	control
913_SRP097870	SRS1941387	control
913_SRP097870	SRS1941375	case
913_SRP097870	SRS1941377	case
913_SRP097870	SRS1941388	control
913_SRP097870	SRS1941389	control
913_SRP097870	SRS1941376	case
2931_SRP071088	SRS1943189	control
2931_SRP071088	SRS1943184	control
2931_SRP071088	SRS1943187	case
2931_SRP071088	SRS1320250	control
2931_SRP071088	SRS1943188	case
2931_SRP071088	SRS1320249	control
1963_SRP044917	SRS668067	case
1963_SRP044917	SRS668062	case
1963_SRP044917	SRS668060	control
1963_SRP044917	SRS668065	case
1963_SRP044917	SRS668063	control
1963_SRP044917	SRS668066	control
3020_SRP062956	SRS1047497	case
3020_SRP062956	SRS1047498	control
3020_SRP062956	SRS1047496	case
3020_SRP062956	SRS1047499	control
1542_SRP092004	SRS1757872	case
1542_SRP092004	SRS1757867	control
1542_SRP092004	SRS1757866	control
1542_SRP092004	SRS1757874	case
1542_SRP092004	SRS1757871	case
1542_SRP092004	SRS1757868	control
1109_SRP041036	SRS590267	case
1109_SRP041036	SRS590287	case
1109_SRP041036	SRS590265	control
1109_SRP041036	SRS590305	control
1109_SRP041036	SRS590307	case
1109_SRP041036	SRS590285	control
2675_SRP110620	SRS2318640	control
2675_SRP110620	SRS2318642	control
2675_SRP110620	SRS2318646	case
2675_SRP110620	SRS2318644	case
2675_SRP110620	SRS2318654	case
2675_SRP110620	SRS2318641	control
2675_SRP110620	SRS2318645	case
2675_SRP110620	SRS2318643	case
2675_SRP110620	SRS2318653	control
2675_SRP110620	SRS2318639	control
1551_SRP092004	SRS1757840	case
1551_SRP092004	SRS1757844	case
1551_SRP092004	SRS1757838	control
1551_SRP092004	SRS1757836	control
1551_SRP092004	SRS1757843	case
1551_SRP092004	SRS1757837	control
2737_SRP100570	SRS1996915	case
2737_SRP100570	SRS1996913	control
2737_SRP100570	SRS1996912	case
2737_SRP100570	SRS1996925	control
2737_SRP100570	SRS1996919	control
2737_SRP100570	SRS1996924	case
2226_SRP090090	SRS1701602	control
2226_SRP090090	SRS1701605	case
2226_SRP090090	SRS1701603	control
2226_SRP090090	SRS1701604	case
747_SRP107198	SRS2206622	control
747_SRP107198	SRS2206617	control
747_SRP107198	SRS2206595	case
747_SRP107198	SRS2206621	control
747_SRP107198	SRS2206618	control
747_SRP107198	SRS2206594	case
747_SRP107198	SRS2206619	control
747_SRP107198	SRS2206620	control
747_SRP107198	SRS2206593	case
1782_SRP076334	SRS1732720	control
1782_SRP076334	SRS1732725	control
1782_SRP076334	SRS1732730	case
1782_SRP076334	SRS1732723	case
1782_SRP076334	SRS1732739	case
1782_SRP076334	SRS1732735	control
1782_SRP076334	SRS1732733	control
1782_SRP076334	SRS1732721	case
1782_SRP076334	SRS1732727	case
1782_SRP076334	SRS1732729	case
1782_SRP076334	SRS1732737	control
1782_SRP076334	SRS1732736	case
1782_SRP076334	SRS1732738	case
1782_SRP076334	SRS1732728	case
1782_SRP076334	SRS1732731	control
1782_SRP076334	SRS1732719	case
1782_SRP076334	SRS1732734	control
1782_SRP076334	SRS1732724	case
1782_SRP076334	SRS1732726	case
1782_SRP076334	SRS1732732	case
1782_SRP076334	SRS1732740	control
1782_SRP076334	SRS1732722	case
2644_SRP090658	SRS1720190	control
2644_SRP090658	SRS1720195	control
2644_SRP090658	SRS1720199	control
2644_SRP090658	SRS1720205	case
2644_SRP090658	SRS1720197	control
2644_SRP090658	SRS1720191	control
2644_SRP090658	SRS1720202	control
2644_SRP090658	SRS1720189	control
2644_SRP090658	SRS1720204	case
2644_SRP090658	SRS1720206	case
2644_SRP090658	SRS1720194	control
2644_SRP090658	SRS1720203	control
2648_SRP091857	SRS1754265	case
2648_SRP091857	SRS1754263	control
2648_SRP091857	SRS1754267	control
2648_SRP091857	SRS1754266	control
2648_SRP091857	SRS1754262	case
2648_SRP091857	SRS1754264	case
2351_SRP059217	SRS956182	case
2351_SRP059217	SRS956188	control
2351_SRP059217	SRS956178	case
2351_SRP059217	SRS956189	control
2351_SRP059217	SRS956180	case
2351_SRP059217	SRS956181	case
2351_SRP059217	SRS956190	control
2351_SRP059217	SRS956187	control
693_SRP102430	SRS2069981	control
693_SRP102430	SRS2069997	case
693_SRP102430	SRS2069982	control
693_SRP102430	SRS2069998	case
693_SRP102430	SRS2069999	case
693_SRP102430	SRS2070000	case
693_SRP102430	SRS2069984	control
693_SRP102430	SRS2069983	control
772_SRP058771	SRS947367	control
772_SRP058771	SRS947368	case
772_SRP058771	SRS947363	control
772_SRP058771	SRS947356	control
772_SRP058771	SRS947364	case
772_SRP058771	SRS947355	case
2241_SRP061772	SRS1016321	control
2241_SRP061772	SRS1016317	case
2241_SRP061772	SRS1016320	control
2241_SRP061772	SRS1016319	control
2241_SRP061772	SRS1016316	case
2241_SRP061772	SRS1016318	case
2398_SRP098916	SRS1959564	control
2398_SRP098916	SRS1959562	control
2398_SRP098916	SRS1959565	case
2398_SRP098916	SRS1959567	case
2398_SRP098916	SRS1959563	control
2398_SRP098916	SRS1959566	case
1590_SRP050193	SRS1021802	control
1590_SRP050193	SRS1021800	case
1590_SRP050193	SRS1021799	case
1590_SRP050193	SRS1021801	control
750_SRP107198	SRS2206604	case
750_SRP107198	SRS2206622	control
750_SRP107198	SRS2206602	case
750_SRP107198	SRS2206617	control
750_SRP107198	SRS2206621	control
750_SRP107198	SRS2206618	control
750_SRP107198	SRS2206603	case
750_SRP107198	SRS2206619	control
750_SRP107198	SRS2206620	control
2781_SRP095403	SRS1871773	control
2781_SRP095403	SRS1871774	case
2781_SRP095403	SRS1871772	control
2781_SRP095403	SRS1871776	case
1534_SRP092004	SRS1757893	case
1534_SRP092004	SRS1757894	case
1534_SRP092004	SRS1757899	control
1534_SRP092004	SRS1757900	control
1534_SRP092004	SRS1757901	control
1534_SRP092004	SRS1757895	case
20_SRP065206	SRS1130913	case
20_SRP065206	SRS1130922	control
20_SRP065206	SRS1130924	control
20_SRP065206	SRS1130917	case
20_SRP065206	SRS1130925	control
20_SRP065206	SRS1130920	case
1107_SRP041036	SRS590306	case
1107_SRP041036	SRS590286	case
1107_SRP041036	SRS590266	case
1107_SRP041036	SRS590265	control
1107_SRP041036	SRS590305	control
1107_SRP041036	SRS590285	control
962_SRP111173	SRS2339241	control
962_SRP111173	SRS2339238	case
962_SRP111173	SRS2339237	case
962_SRP111173	SRS2339240	control
962_SRP111173	SRS2339239	control
962_SRP111173	SRS2339236	case
125_SRP029434	SRS475471	control
125_SRP029434	SRS475470	case
125_SRP029434	SRS475472	case
559_SRP076462	SRS1497514	case
559_SRP076462	SRS1497511	control
559_SRP076462	SRS1497510	case
559_SRP076462	SRS1497512	case
559_SRP076462	SRS1497513	control
559_SRP076462	SRS1497509	control
2916_SRP091854	SRS1754192	control
2916_SRP091854	SRS1754230	control
2916_SRP091854	SRS1754207	case
2916_SRP091854	SRS1754194	control
2916_SRP091854	SRS1754209	case
2916_SRP091854	SRS1754215	control
2916_SRP091854	SRS1754258	control
2916_SRP091854	SRS1754212	control
2916_SRP091854	SRS1754191	control
2916_SRP091854	SRS1754187	control
2916_SRP091854	SRS1754205	control
2916_SRP091854	SRS1754210	case
2916_SRP091854	SRS1754233	control
2916_SRP091854	SRS1754203	control
2916_SRP091854	SRS1754232	control
2916_SRP091854	SRS1754208	control
2916_SRP091854	SRS1754186	control
2916_SRP091854	SRS1754259	control
2916_SRP091854	SRS1754189	control
2916_SRP091854	SRS1754193	control
2916_SRP091854	SRS1754231	control
2916_SRP091854	SRS1754195	control
2916_SRP091854	SRS1754213	control
2916_SRP091854	SRS1754214	control
2916_SRP091854	SRS1754211	case
2916_SRP091854	SRS1754184	control
2916_SRP091854	SRS1754206	control
3068_SRP062099	SRS1026784	case
3068_SRP062099	SRS1026790	control
3068_SRP062099	SRS1026789	control
3068_SRP062099	SRS1026783	case
2416_SRP068243	SRS1243674	case
2416_SRP068243	SRS1243672	case
2416_SRP068243	SRS1243665	control
2416_SRP068243	SRS1243662	control
2416_SRP068243	SRS1243676	case
2416_SRP068243	SRS1243664	control
2416_SRP068243	SRS1243673	case
2416_SRP068243	SRS1243663	control
1214_SRP058647	SRS944292	control
1214_SRP058647	SRS944290	case
1214_SRP058647	SRS944293	control
1214_SRP058647	SRS944291	case
1151_SRP061380	SRS1008587	control
1151_SRP061380	SRS1008588	control
1151_SRP061380	SRS1008586	case
1151_SRP061380	SRS1008585	case
1151_SRP061380	SRS1008584	case
1151_SRP061380	SRS1008589	control
1177_SRP063980	SRS1079514	control
1177_SRP063980	SRS1079511	case
1177_SRP063980	SRS1079509	case
1177_SRP063980	SRS1079512	control
1177_SRP063980	SRS1079513	control
1177_SRP063980	SRS1079510	case
354_SRP070636	SRS1305836	control
354_SRP070636	SRS1305837	case
354_SRP070636	SRS1305838	control
354_SRP070636	SRS1305835	case
92_SRP065305	SRS1135523	control
92_SRP065305	SRS1135531	control
92_SRP065305	SRS1135521	case
92_SRP065305	SRS1135529	case
2399_SRP098916	SRS1959572	case
2399_SRP098916	SRS1959564	control
2399_SRP098916	SRS1959562	control
2399_SRP098916	SRS1959573	case
2399_SRP098916	SRS1959571	case
2399_SRP098916	SRS1959563	control
2988_ERP018533	ERS1421236	control
2988_ERP018533	ERS1421242	control
2988_ERP018533	ERS1421245	case
2988_ERP018533	ERS1421239	case
751_SRP107198	SRS2206622	control
751_SRP107198	SRS2206617	control
751_SRP107198	SRS2206607	case
751_SRP107198	SRS2206621	control
751_SRP107198	SRS2206618	control
751_SRP107198	SRS2206606	case
751_SRP107198	SRS2206619	control
751_SRP107198	SRS2206620	control
751_SRP107198	SRS2206605	case
2237_SRP061772	SRS1016315	control
2237_SRP061772	SRS1016310	case
2237_SRP061772	SRS1016313	control
2237_SRP061772	SRS1016311	case
2237_SRP061772	SRS1016314	control
2237_SRP061772	SRS1016312	case
794_SRP074134	SRS1416642	case
794_SRP074134	SRS1416646	control
794_SRP074134	SRS1416647	control
794_SRP074134	SRS1416645	control
794_SRP074134	SRS1416643	case
794_SRP074134	SRS1416644	case
982_SRP090830	SRS1727604	control
982_SRP090830	SRS1727602	control
982_SRP090830	SRS1727608	case
982_SRP090830	SRS1727609	case
982_SRP090830	SRS1727610	case
982_SRP090830	SRS1727603	control
1646_SRP042158	SRS616813	control
1646_SRP042158	SRS616800	control
1646_SRP042158	SRS616828	control
1646_SRP042158	SRS616826	case
1646_SRP042158	SRS616840	case
1646_SRP042158	SRS616815	control
1646_SRP042158	SRS616799	control
1646_SRP042158	SRS616801	control
1646_SRP042158	SRS616812	case
1646_SRP042158	SRS616827	control
1646_SRP042158	SRS616829	control
1646_SRP042158	SRS616814	control
2236_SRP061772	SRS1016330	control
2236_SRP061772	SRS1016333	control
2236_SRP061772	SRS1016329	case
2236_SRP061772	SRS1016327	case
2236_SRP061772	SRS1016331	case
2236_SRP061772	SRS1016332	control
88_SRP065305	SRS1135534	case
88_SRP065305	SRS1135526	case
88_SRP065305	SRS1135535	control
88_SRP065305	SRS1135527	control
1812_SRP087439	SRS1675609	control
1812_SRP087439	SRS1675589	control
1812_SRP087439	SRS1675586	control
1812_SRP087439	SRS1675601	case
1812_SRP087439	SRS1675605	case
1812_SRP087439	SRS1675598	case
1812_SRP087439	SRS1675603	control
1812_SRP087439	SRS1675588	case
1812_SRP087439	SRS1675593	control
1812_SRP087439	SRS1675608	case
1812_SRP087439	SRS1675606	control
1812_SRP087439	SRS1675599	control
2225_SRP090090	SRS1701594	control
2225_SRP090090	SRS1701596	case
2225_SRP090090	SRS1701595	control
2225_SRP090090	SRS1701597	case
90_SRP065305	SRS1135524	case
90_SRP065305	SRS1135535	control
90_SRP065305	SRS1135527	control
90_SRP065305	SRS1135532	case
2933_SRP071088	SRS1943189	control
2933_SRP071088	SRS1320251	case
2933_SRP071088	SRS1943184	control
2933_SRP071088	SRS1320247	case
2933_SRP071088	SRS1320250	control
2933_SRP071088	SRS1320249	control
1193_SRP082423	SRS1629764	control
1193_SRP082423	SRS1629762	control
1193_SRP082423	SRS1629737	case
1193_SRP082423	SRS1629739	case
914_SRP097870	SRS1941386	control
914_SRP097870	SRS1941385	control
914_SRP097870	SRS1941384	control
914_SRP097870	SRS1941373	case
914_SRP097870	SRS1941372	case
914_SRP097870	SRS1941374	case
1213_SRP058647	SRS944295	case
1213_SRP058647	SRS944297	control
1213_SRP058647	SRS944294	case
1213_SRP058647	SRS944296	control
2816_SRP051595	SRS804752	control
2816_SRP051595	SRS804756	case
2816_SRP051595	SRS804759	case
1771_SRP066171	SRS1162693	case
1771_SRP066171	SRS1162692	case
1771_SRP066171	SRS1162717	control
1771_SRP066171	SRS1162694	control
1771_SRP066171	SRS1162712	control
1771_SRP066171	SRS1162713	control
1771_SRP066171	SRS1162695	control
1771_SRP066171	SRS1162716	control
1771_SRP066171	SRS1162711	control
1495_SRP095402	SRS1871747	case
1495_SRP095402	SRS1871752	control
1495_SRP095402	SRS1871735	case
1495_SRP095402	SRS1871733	control
1495_SRP095402	SRS1871757	control
1495_SRP095402	SRS1871753	control
1495_SRP095402	SRS1871726	case
1495_SRP095402	SRS1871742	case
89_SRP065305	SRS1135525	case
89_SRP065305	SRS1135533	case
89_SRP065305	SRS1135535	control
89_SRP065305	SRS1135527	control
1198_SRP082423	SRS1629734	case
1198_SRP082423	SRS1629757	control
1198_SRP082423	SRS1629732	case
1198_SRP082423	SRS1629756	control
2896_SRP091854	SRS1754192	control
2896_SRP091854	SRS1754230	control
2896_SRP091854	SRS1754194	control
2896_SRP091854	SRS1754215	control
2896_SRP091854	SRS1754217	case
2896_SRP091854	SRS1754258	control
2896_SRP091854	SRS1754212	control
2896_SRP091854	SRS1754191	control
2896_SRP091854	SRS1754187	control
2896_SRP091854	SRS1754205	control
2896_SRP091854	SRS1754233	control
2896_SRP091854	SRS1754203	control
2896_SRP091854	SRS1754232	control
2896_SRP091854	SRS1754208	control
2896_SRP091854	SRS1754216	case
2896_SRP091854	SRS1754186	control
2896_SRP091854	SRS1754259	control
2896_SRP091854	SRS1754189	control
2896_SRP091854	SRS1754193	control
2896_SRP091854	SRS1754231	control
2896_SRP091854	SRS1754195	control
2896_SRP091854	SRS1754213	control
2896_SRP091854	SRS1754214	control
2896_SRP091854	SRS1754184	control
2896_SRP091854	SRS1754206	control
1414_SRP079914	SRS1628885	control
1414_SRP079914	SRS1585891	control
1414_SRP079914	SRS1585892	case
297_SRP075592	SRS1463673	case
297_SRP075592	SRS1463672	case
297_SRP075592	SRS1463669	control
297_SRP075592	SRS1463658	control
297_SRP075592	SRS1463671	case
297_SRP075592	SRS1463657	control
1212_SRP049756	SRS743465	control
1212_SRP049756	SRS743466	case
1212_SRP049756	SRS743467	case
1212_SRP049756	SRS743464	control
1770_SRP066171	SRS1162708	case
1770_SRP066171	SRS1162710	case
1770_SRP066171	SRS1162717	control
1770_SRP066171	SRS1162712	control
1770_SRP066171	SRS1162713	control
1770_SRP066171	SRS1162709	case
1770_SRP066171	SRS1162716	control
1770_SRP066171	SRS1162711	control
1174_SRP063980	SRS1079516	case
1174_SRP063980	SRS1079515	case
1174_SRP063980	SRS1079468	control
1174_SRP063980	SRS1079518	control
1174_SRP063980	SRS1079517	case
1174_SRP063980	SRS1079519	control
1194_SRP082423	SRS1629754	control
1194_SRP082423	SRS1629730	case
1194_SRP082423	SRS1629731	case
1194_SRP082423	SRS1629753	control
296_SRP075592	SRS1463675	case
296_SRP075592	SRS1463676	case
296_SRP075592	SRS1463669	control
296_SRP075592	SRS1463658	control
296_SRP075592	SRS1463657	control
296_SRP075592	SRS1463674	case
790_SRP071170	SRS1324058	control
790_SRP071170	SRS1324056	control
790_SRP071170	SRS1324051	case
790_SRP071170	SRS1324061	control
790_SRP071170	SRS1324060	control
790_SRP071170	SRS1324054	case
790_SRP071170	SRS1324055	case
790_SRP071170	SRS1324062	control
790_SRP071170	SRS1324049	case
790_SRP071170	SRS1324057	control
790_SRP071170	SRS1324050	case
790_SRP071170	SRS1324052	case
790_SRP071170	SRS1324059	control
790_SRP071170	SRS1324053	case
947_SRP098688	SRS1952559	case
947_SRP098688	SRS1952555	control
947_SRP098688	SRS1952554	control
947_SRP098688	SRS1952558	case
945_SRP098688	SRS1952552	control
945_SRP098688	SRS1952556	case
945_SRP098688	SRS1952553	control
945_SRP098688	SRS1952557	case
588_SRP061881	SRS1019094	case
588_SRP061881	SRS1019096	case
588_SRP061881	SRS1019099	control
588_SRP061881	SRS1019101	control
588_SRP061881	SRS1019098	control
588_SRP061881	SRS1019097	case
2227_SRP090090	SRS1701600	case
2227_SRP090090	SRS1701598	control
2227_SRP090090	SRS1701601	case
2227_SRP090090	SRS1701599	control
1767_SRP066171	SRS1162701	case
1767_SRP066171	SRS1162697	case
1767_SRP066171	SRS1162717	control
1767_SRP066171	SRS1162694	control
1767_SRP066171	SRS1162712	control
1767_SRP066171	SRS1162713	control
1767_SRP066171	SRS1162695	control
1767_SRP066171	SRS1162700	case
1767_SRP066171	SRS1162716	control
1767_SRP066171	SRS1162696	case
1767_SRP066171	SRS1162711	control
2817_SRP051595	SRS804757	case
2817_SRP051595	SRS804752	control
2817_SRP051595	SRS804760	case
1772_SRP066171	SRS1162693	case
1772_SRP066171	SRS1162692	case
1772_SRP066171	SRS1162715	case
1772_SRP066171	SRS1162717	control
1772_SRP066171	SRS1162694	control
1772_SRP066171	SRS1162712	control
1772_SRP066171	SRS1162713	control
1772_SRP066171	SRS1162695	control
1772_SRP066171	SRS1162716	control
1772_SRP066171	SRS1162714	case
1772_SRP066171	SRS1162711	control
146_SRP065678	SRS1145421	case
146_SRP065678	SRS1145418	control
146_SRP065678	SRS1145422	case
146_SRP065678	SRS1145419	control
146_SRP065678	SRS1145420	control
146_SRP065678	SRS1145423	case
2845_SRP095644	SRS1878634	control
2845_SRP095644	SRS1878637	case
2845_SRP095644	SRS1878632	control
2845_SRP095644	SRS1878633	control
2845_SRP095644	SRS1878635	case
2845_SRP095644	SRS1878636	case
1171_SRP035864	SRS543679	control
1171_SRP035864	SRS543675	case
1171_SRP035864	SRS543676	case
1171_SRP035864	SRS543682	control
1171_SRP035864	SRS543680	control
1171_SRP035864	SRS543681	control
1171_SRP035864	SRS543674	case
1171_SRP035864	SRS543678	case
1171_SRP035864	SRS543677	case
1106_SRP041036	SRS590269	case
1106_SRP041036	SRS590309	case
1106_SRP041036	SRS590289	case
1106_SRP041036	SRS590265	control
1106_SRP041036	SRS590305	control
1106_SRP041036	SRS590285	control
350_SRP113250	SRS2373669	case
350_SRP113250	SRS2373670	case
350_SRP113250	SRS2373666	control
350_SRP113250	SRS2373673	case
604_SRP093655	SRS1803330	case
604_SRP093655	SRS1803327	control
604_SRP093655	SRS1803328	control
604_SRP093655	SRS1803325	control
604_SRP093655	SRS1803324	control
604_SRP093655	SRS1803329	case
351_SRP113250	SRS2373666	control
351_SRP113250	SRS2373675	case
351_SRP113250	SRS2373674	case
1108_SRP041036	SRS590308	case
1108_SRP041036	SRS590288	case
1108_SRP041036	SRS590265	control
1108_SRP041036	SRS590305	control
1108_SRP041036	SRS590268	case
1108_SRP041036	SRS590285	control
1766_SRP066171	SRS1162715	case
1766_SRP066171	SRS1162717	control
1766_SRP066171	SRS1162712	control
1766_SRP066171	SRS1162713	control
1766_SRP066171	SRS1162716	control
1766_SRP066171	SRS1162714	case
1766_SRP066171	SRS1162711	control
589_SRP061881	SRS1019093	control
589_SRP061881	SRS1019102	control
589_SRP061881	SRS1019095	case
589_SRP061881	SRS1019103	case
589_SRP061881	SRS1019100	case
589_SRP061881	SRS1019104	control
589_SRP061881	SRS1019105	control
589_SRP061881	SRS1019106	case
2503_SRP058804	SRS948006	case
2503_SRP058804	SRS948008	case
2503_SRP058804	SRS948001	control
2503_SRP058804	SRS948003	control
879_SRP095523	SRS1874608	case
879_SRP095523	SRS1874605	control
879_SRP095523	SRS1874610	case
879_SRP095523	SRS1874603	control
879_SRP095523	SRS1874606	control
879_SRP095523	SRS1874607	control
879_SRP095523	SRS1874611	case
879_SRP095523	SRS1874609	case
879_SRP095523	SRS1874604	control
879_SRP095523	SRS1874612	case
1196_SRP082423	SRS1629758	control
1196_SRP082423	SRS1629736	case
1196_SRP082423	SRS1629733	case
1196_SRP082423	SRS1629760	control
2936_SRP103305	SRS2110132	control
2936_SRP103305	SRS2110127	case
2936_SRP103305	SRS2110126	case
2936_SRP103305	SRS2110133	control
2936_SRP103305	SRS2110131	control
2936_SRP103305	SRS2110125	case
1516_SRP075717	SRS1467178	control
1516_SRP075717	SRS1482843	case
1516_SRP075717	SRS1482837	case
1516_SRP075717	SRS1467167	control
1516_SRP075717	SRS1467174	control
1516_SRP075717	SRS1482844	case
1516_SRP075717	SRS1482840	control
1516_SRP075717	SRS1482846	case
1516_SRP075717	SRS1482836	control
2504_SRP058804	SRS948002	control
2504_SRP058804	SRS948004	case
2504_SRP058804	SRS948000	control
2504_SRP058804	SRS948005	case
2987_ERP018533	ERS1421238	case
2987_ERP018533	ERS1421236	control
2987_ERP018533	ERS1421242	control
2987_ERP018533	ERS1421244	case
1515_SRP075717	SRS1467178	control
1515_SRP075717	SRS1482838	case
1515_SRP075717	SRS1482845	case
1515_SRP075717	SRS1467167	control
1515_SRP075717	SRS1467174	control
1515_SRP075717	SRS1482847	case
1515_SRP075717	SRS1482842	case
1515_SRP075717	SRS1482840	control
1515_SRP075717	SRS1482836	control
1170_SRP033401	SRS509615	case
1170_SRP033401	SRS509616	control
1170_SRP033401	SRS509614	case
1170_SRP033401	SRS509617	control
1851_SRP075776	SRS1468648	case
1851_SRP075776	SRS1468642	case
1851_SRP075776	SRS1468636	control
1851_SRP075776	SRS1468630	control
1851_SRP075776	SRS1468641	case
1851_SRP075776	SRS1468643	case
1851_SRP075776	SRS1468649	case
1851_SRP075776	SRS1468647	case
1851_SRP075776	SRS1468637	control
1851_SRP075776	SRS1468633	control
1851_SRP075776	SRS1468635	control
1851_SRP075776	SRS1468629	control
2982_ERP018533	ERS1560829	case
2982_ERP018533	ERS1560821	control
2982_ERP018533	ERS1560827	control
2982_ERP018533	ERS1560823	case
2986_ERP018533	ERS1421236	control
2986_ERP018533	ERS1421237	case
2986_ERP018533	ERS1421243	case
2986_ERP018533	ERS1421242	control
2780_SRP095403	SRS1871777	case
2780_SRP095403	SRS1871773	control
2780_SRP095403	SRS1871772	control
2780_SRP095403	SRS1871775	case
2782_SRP095403	SRS1871773	control
2782_SRP095403	SRS1871772	control
2782_SRP095403	SRS1871781	case
2782_SRP095403	SRS1871779	case
