# Supplementary material for: Transcriptional Inhibition of Host Viral Entry Proteins as a Therapeutic Strategy for SARS-CoV-2
Source: Preprints.org preprint supplement (doi:10.20944/preprints202003.0360.v1), 2020-03-24
Supplement: Supplementary file 5 [file Supplementary_Table_4_CTSL_modulators.xlsx]

## Sheet: Transcriptional modulators
SRP ID (see tab 2 for sample assignments)	Manual annotation string	baseMean	log2(FC), negative = down-regulation in treatment	lfcSE	stat	raw p-value	adjusted p-value (within study)	Number genes tested by DESeq	Number of genes with raw p<0.05 and up-regulation	Number of genes with raw p<0.05 and down-regulation	CTSL rank out of all genes, by p-value
307_SRP095613	treatment,transfected with (2µg) sh-MKL-1/2 pLKO+ (3µg) sh-EF30 pSUPER	915.678	-11.365	1.28883	8.81808	1.16435e-18	2.71538e-17	15070	3581	3709	645
308_SRP095613	treatment,transfected with (2µg) sh-MKL-1/2 pLKO+ (3µg) sh-scrambled pSUPER	1003.27	-10.7029	1.04581	10.2341	1.39532e-24	4.03673e-23	15014	3590	3768	518
310_SRP095613	treatment,transfected with (3µg) sh-EF30 pSUPER+ (2µg) sh-NS pLKO	803.138	-10.7026	1.44511	7.40605	1.30116e-13	1.9247e-12	14761	3498	3553	996
2696_SRP072038	treatment protocol,FTC133 cell line treated with 50 µM proscillaridin A for 72 hours	5339.31	-4.40069	0.367316	11.9806	4.48803e-33	7.20889e-31	15420	4182	4482	96
2695_SRP072038	treatment protocol,FTC133 cell line treated with 50 µM proscillaridin A for 48 hours	4178.9	-4.06297	0.372115	10.9186	9.39616e-28	1.12043e-25	14190	3585	3540	119
2686_SRP072038	treatment protocol,FTC133 cell line treated with 50 µM proscillaridin A	3131.77	-3.98701	0.351223	11.3518	7.26798e-30	6.00653e-28	15552	4382	4281	188
2693_SRP072038	treatment protocol,FTC133 cell line treated with 50 µM digoxin for 72 hours	4708.06	-3.75013	0.364539	10.2873	8.03821e-25	9.27352e-23	14421	3628	3694	125
2699_SRP072038	treatment protocol,FTC133 cell line treated with 50 µM strophantin K for 72 hours	5506.62	-3.55901	0.367942	9.67274	3.93679e-22	2.55108e-20	14969	3621	4056	231
2694_SRP072038	treatment protocol,FTC133 cell line treated with 50 µM proscillaridin A for 24 hours	5505.87	-3.46737	0.368541	9.40837	5.03877e-21	2.60271e-19	14463	3521	3764	280
2698_SRP072038	treatment protocol,FTC133 cell line treated with 50 µM strophantin K for 48 hours	4563.65	-3.44461	0.363817	9.46797	2.85328e-21	2.72759e-19	14148	3262	3279	148
2685_SRP072038	treatment protocol,FTC133 cell line treated with 50 µM digoxin	3185.07	-3.2049	0.338881	9.4573	3.15995e-21	8.74211e-20	14745	4217	4235	532.5
2692_SRP072038	treatment protocol,FTC133 cell line treated with 50 µM digoxin for 48 hours	5656.46	-3.20288	0.36742	8.71721	2.85145e-18	1.38647e-16	14587	3236	3665	300
2687_SRP072038	treatment protocol,FTC133 cell line treated with 50 µM strophantin K	3569.42	-3.01611	0.380329	7.93026	2.18683e-15	3.40186e-14	15115	4164	4227	971
292_SRP053186	IL27 treatment	287.644	-3.01558	0.543375	5.54972	2.86125e-08	0.000106811	15643	116	35	4
2690_SRP072038	treatment protocol,FTC133 cell line treated with 50 µM digoxigenin for 72 hours	5759.08	-2.90305	0.368588	7.87614	3.37658e-15	1.08095e-13	14758	3245	3656	461
2691_SRP072038	treatment protocol,FTC133 cell line treated with 50 µM digoxin for 24 hours	4763.23	-2.70336	0.358768	7.53511	4.87925e-14	2.15343e-12	14123	3010	2966	320
2689_SRP072038	treatment protocol,FTC133 cell line treated with 50 µM digoxigenin for 48 hours	4487.03	-2.69599	0.358419	7.5219	5.39875e-14	2.62081e-12	14078	2850	2821	290
2684_SRP072038	treatment protocol,FTC133 cell line treated with 50 µM digoxigenin	3657.91	-2.62947	0.293028	8.97345	2.8738e-19	8.23989e-18	14893	3922	4004	519
2697_SRP072038	treatment protocol,FTC133 cell line treated with 50 µM strophantin K for 24 hours	5915.92	-2.2791	0.361971	6.29637	3.04702e-10	4.61141e-09	14438	3101	3334	954
2688_SRP072038	treatment protocol,FTC133 cell line treated with 50 µM digoxigenin for 24 hours	5942.52	-2.26975	0.363879	6.23766	4.44152e-10	8.61165e-09	14406	2802	3055	743
2809_ERP013870	RD BMI1 siRNA	12737.6	-2.21464	0.074339	29.7911	5.09943e-195	1.32696e-191	15613	3874	4081	6
1581_SRP099209	infection of humanized mice,HIV-1 infected	1173.74	-2.14622	0.324983	6.6041	3.99947e-11	3.8162e-09	18067	1363	978	181.5
1566_SRP051765	drug treatment,vemurafenib_48h_1µM in Colo800 cells	10547.2	-1.98399	0.0477558	41.5445	0	0	14519	4356	4858	61.5
2209_SRP031620	RNAi_depletion,ZC3H18 siRNA treatment	1011.85	-1.91897	0.137746	13.9312	4.09584e-44	1.19179e-41	15157	448	1623	43
2362_SRP066571	cancer cells BRAF inhibitor treatment	4105.45	-1.9158	0.227127	8.43493	3.31389e-17	3.37736e-15	18050	1972	2215	177
619_SRP100643	treatment,TCR (anti-CD3/anti-CD28/IL-2)	1537.06	-1.80454	0.322093	5.60255	2.11215e-08	4.29562e-07	17263	3278	2259	847
1468_SRP100936	treatment,P. aeruginosa strain 753 stimulated	10065.7	-1.61647	0.1262	12.8088	1.46289e-37	2.87357e-36	14203	3451	3848	723
893_SRP067666	etopsoside treated	2398.89	-1.6076	0.227879	7.05461	1.73085e-12	8.74961e-11	17895	3762	3120	353.5
2213_SRP031620	RNAi_depletion,hRRP40 and ZC3H18 siRNA treatment	831.397	-1.41816	0.153393	9.2453	2.34591e-20	1.70168e-18	13736	525	1735	171
1680_SRP064418	treatment,JQ1 and PD0325901 and NSD2 shRNA vs. doxycycline control	1862.15	-1.40867	0.0856006	16.4563	7.55899e-61	6.71313e-59	14476	3286	3471	163
1914_SRP040418	MCF7 treatment,1 uM S-equol	1121.06	-1.34544	0.0961506	13.993	1.71938e-44	1.0153e-42	14113	2959	2685	239
1916_SRP040418	MCF7 treatment,1 uM genistein	1152.41	-1.30436	0.101772	12.8165	1.32626e-37	7.08922e-36	14165	3024	2817	264.5
1915_SRP040418	MCF7 treatment,1 uM liquiritigenin	1087.13	-1.29962	0.0977727	13.2923	2.56633e-40	1.91574e-38	14034	2708	2399	188
770_SRP065812	after 1 month of adalimumab treatment on skin from psoriasis patient	4461.06	-1.19683	0.224765	5.32481	1.01057e-07	7.12504e-06	20565	2748	3159	290
1785_SRP090547	treatment,2mpk trametinib 30mpkIBET151	1018.96	-1.18546	0.175584	6.75151	1.46316e-11	1.54447e-09	14783	1309	1816	140
1683_SRP064418	treatment,JQ1 and PD0325901 and NSD2 shRNA and doxycyclinevs. doxycycline control	1793.65	-1.17209	0.099749	11.7503	7.03346e-32	2.6779e-30	14468	3515	3487	380
25_SRP065206	Senescent IMR90 shBrd4	1562.86	-1.08884	0.0617366	17.6369	1.2829e-69	1.19545e-67	12207	2716	2872	131
1786_SRP090547	treatment,2mpk trametinib	1122.45	-1.08645	0.238771	4.55019	5.35977e-06	0.00026795	15138	466	880	279
1913_SRP040418	MCF7 treatment,10 nM E2	992.674	-1.04437	0.100011	10.4425	1.5856e-25	4.5519e-24	13952	2905	2424	486
654_SRP070657	treated with,10nM E2 for 24hr	1632.75	-1.03916	0.108767	9.55399	1.24793e-21	2.59897e-20	14397	2997	2846	691
2208_SRP031620	RNAi_depletion,ZCCHC8 and ARS2 siRNA treatment	846.194	-1.0187	0.148064	6.88013	5.97988e-12	2.17493e-10	13626	457	1672	302
2212_SRP031620	RNAi_depletion,hRRP40 and ZCCHC8 siRNA treatment	846.194	-1.0187	0.148064	6.88013	5.97988e-12	2.17493e-10	13626	457	1672	302
1686_SRP064418	treatment,JQ1 and PD0325901 and NSD2 shRNA vs. NSD2 shRNA control	1651.67	-1.01626	0.0978065	10.3905	2.73794e-25	8.10645e-24	14419	3035	3117	487
2366_SRP056220	OVOL1.shRNA.trophoblast.cells	5349.99	-1.0106	0.17171	5.88547	3.96913e-09	4.26213e-07	13208	514	942	123
1449_SRP094854	dexamethasone treatment in A549, different times	8546.77	-0.961784	0.122562	7.84735	4.24928e-15	2.40158e-13	14644	1328	1207	259
1451_SRP094854	dexamethasone treatment in A549, different times	7513.83	-0.923424	0.0976522	9.45625	3.19171e-21	2.12757e-19	14676	1673	1619	220
1681_SRP064418	treatment,JQ1 and NSD2 shRNA vs. doxycycline control	1942.46	-0.916427	0.0906345	10.1112	4.92541e-24	7.98869e-22	14273	2049	1980	88
1679_SRP064418	treatment,PD0325901 and NSD2 shRNA vs. doxycycline control	2005.06	-0.908799	0.0719691	12.6276	1.4869e-36	3.01159e-35	14745	3737	4312	728
2206_SRP031620	RNAi_depletion,ZCCHC8 siRNA treatment	759.109	-0.862849	0.156409	5.51662	3.45573e-08	1.06957e-06	12888	483	734	263
1586_SRP050193	JQ1 SUM159 cells	3403.43	-0.821735	0.0948643	8.66221	4.62693e-18	3.16419e-16	14436	1994	2139	207
2207_SRP031620	RNAi_depletion,ZCCHC8 and CBP80 siRNA treatment	871.091	-0.820211	0.148058	5.5398	3.02825e-08	4.70231e-07	13711	665	2013	746
2403_SRP098916	treatment,E2	1791.11	-0.806408	0.103007	7.82867	4.9304e-15	3.22702e-13	14208	1375	1189	217
59_SRP119557	100 nM dexamethasone	2750.37	-0.724634	0.138534	5.23073	1.68841e-07	4.5587e-06	13635	1096	828	505
2822_SRP116042	lung cancer cell_SBF2-AS1 siRNA	3701.74	-0.694314	0.0875628	7.92932	2.20344e-15	5.45029e-14	13555	2435	2473	548
2393_SRP098916	treatment,Doxycycline + E2	2212.54	-0.69414	0.0639904	10.8476	2.0481e-27	4.50899e-26	14246	3542	3458	647
1705_SRP076879	treatment,vemurafenib and JQ1 A375 cells	1066.78	-0.66802	0.11993	5.57009	2.54606e-08	7.80902e-07	16432	2067	2645	535
20_SRP065206	100nM JQ1 48h	1512.61	-0.655862	0.0540969	12.1238	7.89872e-34	1.07149e-32	12047	3673	3685	888
2211_SRP031620	RNAi_depletion,hRRP40 siRNA treatment	864.092	-0.653498	0.144874	4.51079	6.45853e-06	0.000120761	13231	387	1046	542.5
161_SRP059701	LHSAR overexpressed with FOXA1	1425.25	-0.653289	0.094774	6.89312	5.45813e-12	9.52371e-11	13767	2483	2248	789
2397_SRP098916	treatment,E2	2025.52	-0.620382	0.0580774	10.682	1.23606e-26	2.97039e-25	14662	3136	2743	610
1446_SRP094854	dexamethasone treatment in A549, different times	8173.13	-0.600112	0.0883712	6.79082	1.11501e-11	7.61268e-10	14691	1148	865	215
1453_SRP094854	dexamethasone treatment in A549, different times	7421.24	-0.589021	0.0954741	6.16943	6.8536e-10	1.84582e-08	14687	1493	1123	545
591_SRP013773	treatment,H2A.Z KD	7350.48	-0.586187	0.129025	4.54319	5.54082e-06	0.000109425	19822	1018	2381	848
61_SRP119557	100 nM dexamethasone	2554.12	-0.585103	0.110641	5.28828	1.23469e-07	2.01066e-06	13500	1232	1315	829
2394_SRP098916	treatment,E2	2226.51	-0.583145	0.0608647	9.581	9.61104e-22	2.76405e-20	14210	2765	2526	494
1687_SRP064418	treatment,JQ1 and NSD2 shRNA vs. NSD2 shRNA control	1759.45	-0.528593	0.102203	5.172	2.31605e-07	5.5025e-06	14222	1395	1326	587
60_SRP119557	100 nM dexamethasone	2332.15	-0.494947	0.0952441	5.19662	2.02943e-07	3.12089e-06	13501	1380	1257	877.5
1026_SRP067492	treatment,SB day 15	6632.64	-0.471523	0.0963045	4.89617	9.77217e-07	1.83314e-05	15007	1317	1708	800
1025_SRP067492	treatment,SB	5150.44	-0.453486	0.0480435	9.43907	3.76112e-21	5.9593e-20	15385	3581	3802	971
2775_SRP049988	A549 EHF overexpression	25873.9	-0.399844	0.073759	5.42095	5.92846e-08	2.42718e-06	16266	2095	1695	397.5
2252_SRP051320	LP-1 cells treatment,2.5uM SGCCBP30 6h	1174.98	-0.392525	0.0717341	5.47195	4.45122e-08	1.45436e-06	14418	922	1479	407
2761_SRP057074	treatment,BuGZ siRNA transfection for 48 h	2866.98	-0.358515	0.0755072	4.74808	2.05353e-06	7.22067e-05	14858	1052	1351	422.5
1908_SRP042186	JAK3 siRNA adipose 7 days may affect cell composition	4469.57	-0.222673	0.044003	5.06039	4.18399e-07	6.98362e-06	14226	1070	1199	852
1906_SRP042186	JAK3 siRNA	3294.24	-0.215149	0.045052	4.77556	1.79203e-06	4.40215e-05	14347	688	731	584
2443_SRP092641	treatment,BPK9	38375.9	0.0898096	0.0184053	-4.87956	1.06323e-06	0.000206647	13269	36	72	14
960_SRP111173	retionoic acid treatment,"10 micromolar, 7 hr" under active xpa	2865.62	0.183327	0.0419639	-4.36869	1.24992e-05	0.000391959	12420	497	333	396
1238_SRP110248	treatment,ML00754792	4172.87	0.262536	0.0496274	-5.29014	1.22223e-07	3.04377e-06	14552	1010	1069	539
1420_SRP097129	siNSUN2	10318.6	0.271468	0.0357569	-7.59203	3.14931e-14	6.34423e-13	13602	2332	2179	649
2144_SRP058856	A375 cells treatment,CPI203	3266.03	0.303156	0.0671143	-4.51701	6.27187e-06	0.000307446	14810	658	827	301
632_SRP070122	siUSPL1	3334.95	0.344498	0.0800952	-4.30111	1.69945e-05	0.000309984	13453	1344	1099	665
981_SRP090830	GSI treatment in ASCL1 k/o cells	1395.59	0.346919	0.0633467	-5.47651	4.338e-08	1.98523e-06	14538	805	879	292
2442_SRP092641	treatment,BPK29	43161.2	0.370201	0.0142017	-26.0673	8.55457e-150	5.97829e-147	13284	2180	2490	19
198_SRP075959	TITLE,PANC1_Cobalt	803.389	0.406745	0.0944497	-4.30647	1.65879e-05	0.000333813	13485	1024	867	670
956_SRP111173	retionoic acid treatment,"1 micromolar, 7 hr" under partially active xpa function	3462.54	0.489363	0.0380708	-12.854	8.16419e-38	6.88209e-36	12815	1696	1514	152
1840_SRP063860	shRNA,doxycycline-inducible shRNA against PNN	516.494	0.490985	0.0506389	-9.69581	3.14136e-22	1.4183e-20	13003	3077	3244	288
2664_SRP064832	decitabine +GSK343_3 (MCF7)	3221.6	0.510339	0.0772831	-6.6035	4.01563e-11	9.61788e-10	16173	2492	1893	675
2659_SRP064832	S2101 (MCF7)	2492.67	0.544289	0.122752	-4.43404	9.24849e-06	0.000431647	14834	624	713	262
955_SRP111173	retionoic acid treatment,"1 micromolar, 7 hr" under inactive xpa function	5047.61	0.557366	0.0396115	-14.0708	5.73984e-45	4.12521e-43	13799	1963	1723	192
1490_SRP095402	treatment,Stimulated with 200 U/ml IFN-gamma	1450.43	0.57629	0.0916503	-6.28793	3.21733e-10	5.87018e-09	13093	1591	1233	717
2316_SRP057452	A375 treated with A771726	3289.92	0.582411	0.0538133	-10.8228	2.68436e-27	7.72435e-26	13323	2440	2582	463
1210_SRP124332	48 hour FHIT induction	3477.3	0.587683	0.0944515	-6.22206	4.90663e-10	1.18471e-08	14920	2205	2126	558
2760_SRP057074	treatment,Bub3 siRNA transfection for 48 h	3844.34	0.612817	0.0699548	-8.76019	1.9492e-18	1.44852e-16	14947	2043	2179	201
789_SRP097000	U-87 MG cells, EPZ015666 treatment 10uM	22584.8	0.619184	0.0570084	-10.8613	1.76283e-27	1.76928e-25	15362	3084	3270	153
1644_SRP094059	treatment,ethanol in hIPSC	691.64	0.620569	0.125217	-4.95595	7.19764e-07	2.51335e-05	16666	1402	1158	449.5
2663_SRP064832	decitabine +S2101 (MCF7)	3442.54	0.63647	0.105727	-6.01993	1.74489e-09	4.29058e-08	16239	2267	1607	660
2661_SRP064832	depsipeptide (MCF7)	2781.88	0.647738	0.0894723	-7.23953	4.50233e-13	1.32384e-11	15236	2830	2902	518
21_SRP065206	Senescent IMR90 shp65	2923.2	0.657956	0.0547561	-12.0161	2.92314e-33	3.3481e-31	12142	1075	1067	106
1513_SRP066934	treatment,hypoxia	483.263	0.665932	0.0917299	-7.25971	3.87927e-13	5.38746e-12	13001	3210	3208	936
1771_SRP066171	K562 treated with,1 μM SAHA	4232.37	0.68714	0.132056	-5.20341	1.95669e-07	7.44353e-06	15599	2244	1494	410
125_SRP029434	shSOX10	3055.38	0.716254	0.161653	-4.43081	9.388e-06	0.000274082	13780	913	518	471.5
1386_SRP058698	treatment perfusion	1360.8	0.725962	0.13998	-5.1862	2.14629e-07	5.41657e-06	15707	1360	728	574
2985_ERP018533	THP-1 growth condition,lipopolysaccharide only	5882.15	0.746634	0.107251	-6.96158	3.36483e-12	6.38505e-11	14137	2466	2017	745
146_SRP065678	drug treatment,Serum-starved	7369.6	0.770993	0.0472524	-16.3165	7.53348e-60	1.25451e-58	14090	4790	4767	846
2630_SRP057721	transfected with,VDR siRNA treated with,"1,25(OH)2D3 treatment"	20553.1	0.792293	0.0576649	-13.7396	5.87979e-43	4.75462e-41	19228	3249	3472	235
1917_SRP040418	MCF7 adenovirus expressing ERB	2085.61	0.794112	0.0742596	-10.6937	1.08906e-26	1.65747e-25	14504	3994	4024	953
877_SRP045695	treatment,"1% DMSO + 20 uM PhenDC3	1103.18	0.794753	0.082939	-9.58238	9.48314e-22	1.22738e-20	12879	3757	3704	995
880_SRP095523	treatment,PAM	138.607	0.819117	0.112027	-7.31178	2.63629e-13	4.24605e-12	9408	1705	1510	584
196_SRP066992	treatment,infected A/PR/8/34 influenza virus (MOI = 1), 24hr	2051.38	0.830265	0.0724391	-11.4616	2.05772e-30	5.54462e-29	13823	3125	2592	513
2629_SRP057721	transfected with,VDR siRNA	22776.9	0.862832	0.0444355	-19.4176	5.47712e-84	6.58413e-82	18810	3926	4014	156
1770_SRP066171	K562 treated with,0.5 mM NaBut	5284.77	0.863423	0.125397	-6.88552	5.75757e-12	1.25922e-10	15555	3255	2784	711
2632_SRP044187	treatment condition,"12h, ZNA, 30 uM"	1246.13	0.896623	0.0702862	-12.7567	2.85917e-37	1.39924e-35	13567	3353	3539	277
2640_SRP090658	treatment,NP-siRNA day 5	8845.23	0.911717	0.0733023	-12.4378	1.63003e-35	4.02679e-34	14184	4216	4163	574
354_SRP070636	4-OHT treatment	5498.87	0.914608	0.116801	-7.83049	4.85982e-15	4.45376e-13	13930	1090	1202	152
962_SRP111173	inactive xpa	1016.31	0.921828	0.0643234	-14.3311	1.39798e-46	3.16338e-45	13330	3970	3840	589
2343_SRP098799	SV7 cells treated with GW9662	3659.11	0.930323	0.149649	-6.21668	5.07768e-10	1.03289e-07	13629	433	711	67
322_SRP076126	DU145 cells, shJARID1D	15081.9	0.976914	0.130091	-7.50946	5.93715e-14	4.48325e-11	14853	431	488	17
2363_SRP052856	treatment,IL-13 (100 ng/mL) in hTERT-immortalized human esophageal epithelial cell line_ALI	680.29	0.990969	0.131634	-7.52822	5.14363e-14	1.94815e-12	12423	1210	1501	328
1443_SRP102725	treatment,chaetocin (30nM)	2926.82	0.996588	0.134358	-7.41741	1.19437e-13	2.63424e-12	14318	2888	3150	649
2241_SRP061772	cell type,brain rhabdoid tumor derived cell line treatment/condition,Doxycycline induced SMARCB1 reexpresion	3378.21	1.00955	0.03841	-26.2836	2.95655e-152	1.19827e-149	13784	2527	2344	34
2759_SRP057074	treatment,pladienolide B treated for 4 h	3748.05	1.01257	0.0770076	-13.149	1.72477e-39	5.01526e-38	14957	3906	4554	514
2053_SRP068046	G9a knockdown with E2 treatment	4721.49	1.03304	0.157862	-6.54392	5.99279e-11	3.19522e-09	14769	1496	680	277
2927_SRP078450	treatment,pegIFNa/ribavirin 16h in HCV-infected indivs	5828.97	1.03421	0.188323	-5.49169	3.98115e-08	5.58972e-06	17743	1519	1310	126
1918_SRP040418	MCF7 adenovirus expressing ERB and siRNA against endogenous ERa	2120.82	1.03998	0.077028	-13.5013	1.53681e-41	4.8725e-40	14204	3896	3641	448
1987_SRP049650	lung metastasis treatment,6AN treated	3294.55	1.07604	0.0683016	-15.7542	6.42685e-56	1.76693e-54	15396	4379	4555	560
74_SRP058375	BxPC-3 exosomes	14440.2	1.0817	0.109725	-9.85822	6.3158e-23	7.20438e-21	14838	2064	2254	130
1444_SRP102725	treatment,combination of chaetocin(30nM)+MLN3237(90nM)	3083.04	1.11709	0.141869	-7.87406	3.43319e-15	1.22945e-13	14756	3512	3537	412
1647_SRP042158	siPSMD13_DMSO_8hr	993.823	1.12267	0.0760205	-14.768	2.35544e-49	1.09193e-47	12567	3668	3636	271
1772_SRP066171	K562 treated with,1 μM SAHA	5697.04	1.14336	0.181259	-6.30788	2.8289e-10	6.86897e-09	16064	3123	2817	661
1657_SRP042158	siPSMD13_DMSO_8-12hr	1133.64	1.14968	0.0548936	-20.9438	2.13842e-97	1.63285e-95	12600	4116	4115	165
1648_SRP042158	siPSDM13_DMSO_12hr	1005.72	1.18009	0.0748172	-15.773	4.77152e-56	3.54363e-54	12554	3579	3553	169
1557_SRP092004	drug,Vemurafenib / THZ1 48hr	1546.87	1.19807	0.059634	-20.0904	8.9478e-90	2.49107e-88	14451	4641	4804	519
2606_SRP056109	DESCRIPTION,PANC-1 cells treated by 5mM metformin and 2mM aspirin for 48h	1303.7	1.21087	0.102107	-11.8589	1.93567e-32	6.88856e-31	14240	4228	4329	400
2052_SRP068046	G9a knockdown	5117.08	1.2181	0.157037	-7.7568	8.71014e-15	6.87817e-13	14818	1597	732	184
2342_SRP098799	UMB cells treated with GW9662	7745.35	1.22259	0.177464	-6.88922	5.60983e-12	1.95627e-09	13330	324	465	36
1537_SRP092004	drug,THZ1 / BGJ398 48hr	1030.65	1.27666	0.0799199	-15.9742	1.93195e-57	4.23384e-56	13655	4282	4357	623
1554_SRP092004	drug,THZ1 48hr	1275.19	1.29105	0.0621048	-20.7882	5.53045e-96	7.49111e-94	14087	3984	4015	104
2623_SRP097673	A549 cells infected with A/PR8/34/(H1N1) at the low concentration of lariciresinol-4-β-D-glucopyranoside treatment (400 ug/ml)	4735.56	1.31433	0.211717	-6.20794	5.36825e-10	1.92537e-08	13916	1364	901	388
1150_SRP061380	fluid shear stress 20 dyne/cm^2	985.571	1.34007	0.144223	-9.29171	1.51836e-20	4.63512e-19	11815	2240	2211	387
1467_SRP100936	treatment,phage PNM lysate stimulated	24793.6	1.34128	0.130854	-10.2502	1.18158e-24	3.73197e-23	13996	2027	1608	443
2720_SRP039598	fetal skin fibroblasts treatment,0.2 ug/ml Doxorubicin 12 hours	6172.12	1.35957	0.104028	-13.0693	4.9347e-39	1.89569e-37	14801	4110	4019	385
1538_SRP092004	drug,Erlotinib 7days	1081.91	1.37541	0.0693299	-19.8386	1.3821e-87	4.056e-86	13971	4614	4641	476
2896_SRP091854	treatment,DRB	535.058	1.39632	0.322043	-4.33582	1.45215e-05	0.000249558	14667	1574	1890	819.5
2486_ERP014062	Ago2 k/d and estrogen receptor expression	267.623	1.48874	0.166779	-8.92644	4.39936e-19	9.49852e-18	16668	2904	2262	772
1766_SRP066171	K562 treated with,1 μM SAHA	6822.8	1.5253	0.130067	-11.727	9.26868e-32	6.79071e-30	15754	3652	3876	215
2823_SRP045905	shlnc277	897.068	1.53486	0.332553	-4.61539	3.92354e-06	0.00143523	16480	340	111	45
282_SRP072507	Gefitinib Treated	3635.04	1.55147	0.314949	-4.9261	8.38856e-07	3.22982e-05	14631	634	819	380
1151_SRP061380	EZH2 knockdown during fluid shear stress	2578.44	1.56009	0.194723	-8.01182	1.13024e-15	1.26372e-13	11742	2012	1629	105
982_SRP090830	ASCL1 k/o	799.306	1.61836	0.104407	-15.5006	3.43874e-54	8.43936e-53	14308	4669	4498	583
2452_SRP115557	tissue,Peripheral blood treatment,cIgG priming for 24 hrs	9027.79	1.71977	0.3425	-5.02122	5.13443e-07	1.02223e-05	12296	1613	1407	617
1666_SRP066083	FK506 for 1 hr and stimulation,Aspergillus fumigatus swollen conidia (MOI=1)	32606.6	1.83361	0.292183	-6.27556	3.48373e-10	7.04299e-09	13309	2946	2414	655
2448_SRP055981	CD4+ T cells treatment,HIV infected	4129.91	1.84659	0.105109	-17.5684	4.30445e-69	4.65059e-67	15666	4273	4447	145
2727_SRP092975	treatment,20μM GSK-J4 for 12h	732.268	1.87289	0.30328	-6.17544	6.59793e-10	7.39615e-08	12940	529	190	101.5
2351_SRP059217	treatment,0.2% serum + 20ng/ml PDGF	12890.1	1.89692	0.321965	-5.89169	3.82265e-09	3.65332e-07	15008	1031	740	156
1170_SRP033401	treatment,tamoxifen in IMR90 cells	2098.91	1.94368	0.0716397	-27.1314	4.20032e-162	2.12874e-160	13481	4470	4121	266
604_SRP093655	TITLE,HUVEC RNY5 Treatment 24 hr replicate 2	788.074	2.09303	0.148873	-14.0591	6.77213e-45	1.4933e-43	15108	3841	3999	671
2931_SRP071088	source_name,Hepatic stellate cells (HSC) with ceramide treatment	4568.77	2.09652	0.178994	-11.7128	1.09615e-31	3.01528e-29	14311	1917	1944	50
129_SRP041826	EX00000246 treatment 24hrs in unstimulated cells	12186.6	2.13961	0.177541	-12.0513	1.9088e-33	4.65004e-32	13216	3739	3721	540
2612_SRP111818	stimulation,50ng/ml LPS+10nM C5a	7354.05	2.23882	0.230953	-9.69385	3.2024e-22	6.63376e-21	12926	3390	3136	621
361_SRP094423	treatment,BCG in M2 macrophages	25976.5	2.29034	0.127411	-17.976	3.0055e-72	8.72128e-70	13092	3521	3217	45
874_SRP064735	shSREBP2	36222.6	2.33149	0.133157	-17.5093	1.21699e-68	7.2223e-66	13056	2925	2440	22
1518_SRP075717	treatment,pCDH ADAR1 Mutant Transduced	649.32	2.42127	0.547406	-4.42318	9.72605e-06	0.000227276	19090	1590	292	813
2932_SRP071088	source_name,Hepatic stellate cells (HSC) with Nortriptyline treatment	7551.14	2.45002	0.126698	-19.3375	2.59863e-83	5.44154e-80	14661	1669	2173	7
790_SRP071170	CD4+CD25- T cells treatment,10 ng/ml IL-6	204.324	2.51859	0.279542	-9.00969	2.06637e-19	5.21181e-18	13751	3914	4165	545
2485_ERP014062	Ago2 k/d	485.14	2.55291	0.138433	-18.4415	6.10337e-76	3.7308e-74	16871	3996	3487	276
2782_SRP095403	genotype,EED knockout	1709.68	2.64877	0.218445	-12.1255	7.73458e-34	2.10316e-32	15608	4981	4627	574
2824_SRP045905	shEWS-FLI	1354.8	2.6782	0.230389	-11.6247	3.08688e-31	1.39596e-28	16341	2495	1722	36
571_SRP062958	treatment,interferon-alpha	1016.79	2.70074	0.357222	-7.56039	4.01849e-14	6.30444e-13	15285	3564	3675	973
2933_SRP071088	source_name,Hepatic stellate cells (HSC) with Nortriptyline and TGF-beta treatment	7460.69	2.75837	0.134459	-20.5146	1.59558e-93	2.10037e-90	14483	2137	2613	11
2017_SRP061634	TGFbeta traetment in HeLa	16710.2	2.77687	0.255028	-10.8885	1.30801e-27	5.89013e-26	15922	1945	2606	353
2227_SRP090090	Mac-24h-siPU	1696.77	2.78515	0.155687	-17.8894	1.4259e-71	9.75734e-70	11154	2607	2527	163
1171_SRP035864	treatment,UVB in skin cells	1089.95	2.79848	0.208575	-13.4171	4.79894e-41	4.41615e-38	15727	2008	1898	17
879_SRP095523	treatment,PAM	195.004	2.84591	0.110563	-25.7402	4.14757e-146	2.95184e-144	10041	2879	2651	141
1842_SRP045570	treatment,0.1uM tofacitinib	411.595	3.14019	0.478346	-6.56468	5.21448e-11	1.07193e-08	16779	702	938	81
1515_SRP075717	treatment,pCDH BCR-ABL	2190.03	3.43256	0.628833	-5.45862	4.79843e-08	1.39064e-06	22035	3268	3504	744
2987_ERP018533	THP1 growth condition,phorbol myristate acetate only	25190.3	3.57387	0.0915179	-39.051	0	0	14223	4139	3612	15.5
2986_ERP018533	THP1 growth condition,phorbol myristate acetate and lipopolysaccharide	30647.5	3.95412	0.107485	-36.7875	2.92607e-296	4.52534e-294	14383	4551	4075	93
1228_SRP045569	treatment,HSV-1	11943.9	4.45988	0.817359	-5.45645	4.85737e-08	1.98907e-06	16068	1078	1227	376
1843_SRP045570	treatment,0.3uM tofacitinib	872.393	4.62777	0.442882	-10.4492	1.47713e-25	1.62277e-22	16610	1547	2064	15
985_SRP120383	treatment group,il6-tnf	14331.9	4.68341	0.345232	-13.566	6.37276e-42	1.20648e-39	12530	3447	3390	66
984_SRP120383	treatment group,r848	26917	5.96786	0.336318	-17.7447	1.8932e-70	2.38994e-68	12797	4372	4560	101

## Sheet: Case-control assignments
SRP ID	SRS sample	Case or control assignment
307_SRP095613	SRS1874588	control
307_SRP095613	SRS1874583	case
307_SRP095613	SRS1874561	control
307_SRP095613	SRS1874592	control
307_SRP095613	SRS1874584	case
307_SRP095613	SRS1874569	control
308_SRP095613	SRS1874578	case
308_SRP095613	SRS1874581	case
308_SRP095613	SRS1874588	control
308_SRP095613	SRS1874561	control
308_SRP095613	SRS1874592	control
308_SRP095613	SRS1874569	control
310_SRP095613	SRS1874580	case
310_SRP095613	SRS1874582	case
310_SRP095613	SRS1874588	control
310_SRP095613	SRS1874561	control
310_SRP095613	SRS1874592	control
310_SRP095613	SRS1874569	control
2696_SRP072038	SRS1349869	control
2696_SRP072038	SRS1349874	control
2696_SRP072038	SRS1349862	case
2696_SRP072038	SRS1349882	control
2695_SRP072038	SRS1349869	control
2695_SRP072038	SRS1349865	case
2695_SRP072038	SRS1349874	control
2695_SRP072038	SRS1349882	control
2686_SRP072038	SRS1349869	control
2686_SRP072038	SRS1349865	case
2686_SRP072038	SRS1349874	control
2686_SRP072038	SRS1349870	case
2686_SRP072038	SRS1349862	case
2686_SRP072038	SRS1349882	control
2693_SRP072038	SRS1349869	control
2693_SRP072038	SRS1349864	case
2693_SRP072038	SRS1349874	control
2693_SRP072038	SRS1349882	control
2699_SRP072038	SRS1349881	case
2699_SRP072038	SRS1349869	control
2699_SRP072038	SRS1349874	control
2699_SRP072038	SRS1349882	control
2694_SRP072038	SRS1349869	control
2694_SRP072038	SRS1349874	control
2694_SRP072038	SRS1349870	case
2694_SRP072038	SRS1349882	control
2698_SRP072038	SRS1349869	control
2698_SRP072038	SRS1349874	control
2698_SRP072038	SRS1349867	case
2698_SRP072038	SRS1349882	control
2685_SRP072038	SRS1349869	control
2685_SRP072038	SRS1349864	case
2685_SRP072038	SRS1349874	control
2685_SRP072038	SRS1349873	case
2685_SRP072038	SRS1349868	case
2685_SRP072038	SRS1349882	control
2692_SRP072038	SRS1349869	control
2692_SRP072038	SRS1349874	control
2692_SRP072038	SRS1349868	case
2692_SRP072038	SRS1349882	control
2687_SRP072038	SRS1349881	case
2687_SRP072038	SRS1349869	control
2687_SRP072038	SRS1349874	control
2687_SRP072038	SRS1349867	case
2687_SRP072038	SRS1349882	control
2687_SRP072038	SRS1349872	case
292_SRP053186	SRS836481	control
292_SRP053186	SRS836491	control
292_SRP053186	SRS836487	case
292_SRP053186	SRS836488	control
292_SRP053186	SRS836483	case
292_SRP053186	SRS836484	case
292_SRP053186	SRS836478	case
292_SRP053186	SRS836482	control
2690_SRP072038	SRS1349869	control
2690_SRP072038	SRS1349874	control
2690_SRP072038	SRS1349863	case
2690_SRP072038	SRS1349882	control
2691_SRP072038	SRS1349869	control
2691_SRP072038	SRS1349874	control
2691_SRP072038	SRS1349873	case
2691_SRP072038	SRS1349882	control
2689_SRP072038	SRS1349869	control
2689_SRP072038	SRS1349874	control
2689_SRP072038	SRS1349866	case
2689_SRP072038	SRS1349882	control
2684_SRP072038	SRS1349869	control
2684_SRP072038	SRS1349874	control
2684_SRP072038	SRS1349866	case
2684_SRP072038	SRS1349871	case
2684_SRP072038	SRS1349863	case
2684_SRP072038	SRS1349882	control
2697_SRP072038	SRS1349869	control
2697_SRP072038	SRS1349874	control
2697_SRP072038	SRS1349882	control
2697_SRP072038	SRS1349872	case
2688_SRP072038	SRS1349869	control
2688_SRP072038	SRS1349874	control
2688_SRP072038	SRS1349871	case
2688_SRP072038	SRS1349882	control
2809_ERP013870	ERS1033557	control
2809_ERP013870	ERS1033555	case
2809_ERP013870	ERS1033558	control
2809_ERP013870	ERS1033554	case
2809_ERP013870	ERS1033559	control
2809_ERP013870	ERS1033556	case
1581_SRP099209	SRS1968949	case
1581_SRP099209	SRS1968948	control
1581_SRP099209	SRS1968947	control
1581_SRP099209	SRS1968950	case
1566_SRP051765	SRS810658	control
1566_SRP051765	SRS810661	case
1566_SRP051765	SRS810662	case
1566_SRP051765	SRS810660	control
2209_SRP031620	SRS492037	case
2209_SRP031620	SRS492033	control
2209_SRP031620	SRS492039	control
2362_SRP066571	SRS1174561	case
2362_SRP066571	SRS1174571	case
2362_SRP066571	SRS1174563	control
2362_SRP066571	SRS1174572	control
2362_SRP066571	SRS1174573	control
2362_SRP066571	SRS1174562	control
2362_SRP066571	SRS1174560	case
2362_SRP066571	SRS1174570	case
619_SRP100643	SRS1999435	case
619_SRP100643	SRS1999424	control
619_SRP100643	SRS1999423	control
619_SRP100643	SRS1999433	case
619_SRP100643	SRS1999434	case
1468_SRP100936	SRS2016362	control
1468_SRP100936	SRS2016368	case
1468_SRP100936	SRS2016363	control
1468_SRP100936	SRS2016361	control
1468_SRP100936	SRS2016369	case
1468_SRP100936	SRS2016367	case
893_SRP067666	SRS1218031	case
893_SRP067666	SRS1218034	control
893_SRP067666	SRS1218038	control
893_SRP067666	SRS1218035	case
2213_SRP031620	SRS492033	control
2213_SRP031620	SRS492039	control
2213_SRP031620	SRS492043	case
1680_SRP064418	SRS1097849	control
1680_SRP064418	SRS1097835	case
1680_SRP064418	SRS1097834	case
1680_SRP064418	SRS1097848	control
1914_SRP040418	SRS579420	control
1914_SRP040418	SRS579419	control
1914_SRP040418	SRS579426	case
1914_SRP040418	SRS579425	case
1916_SRP040418	SRS579420	control
1916_SRP040418	SRS579419	control
1916_SRP040418	SRS579423	case
1916_SRP040418	SRS579424	case
1915_SRP040418	SRS579420	control
1915_SRP040418	SRS579428	case
1915_SRP040418	SRS579419	control
1915_SRP040418	SRS579427	case
770_SRP065812	SRS1152627	control
770_SRP065812	SRS1152634	control
770_SRP065812	SRS1152621	case
770_SRP065812	SRS1152610	case
770_SRP065812	SRS1152616	case
770_SRP065812	SRS1152604	case
770_SRP065812	SRS1152615	case
770_SRP065812	SRS1152618	case
770_SRP065812	SRS1152613	case
770_SRP065812	SRS1152620	case
770_SRP065812	SRS1152628	control
770_SRP065812	SRS1152607	case
770_SRP065812	SRS1152630	control
770_SRP065812	SRS1152619	case
770_SRP065812	SRS1152609	case
770_SRP065812	SRS1152614	case
770_SRP065812	SRS1152625	control
770_SRP065812	SRS1152612	case
770_SRP065812	SRS1152640	control
770_SRP065812	SRS1152623	control
770_SRP065812	SRS1152632	control
770_SRP065812	SRS1152605	case
770_SRP065812	SRS1152629	control
770_SRP065812	SRS1152608	case
770_SRP065812	SRS1152606	case
770_SRP065812	SRS1152637	control
770_SRP065812	SRS1152631	control
770_SRP065812	SRS1152636	control
770_SRP065812	SRS1152626	control
770_SRP065812	SRS1152635	control
770_SRP065812	SRS1152611	case
770_SRP065812	SRS1152617	case
770_SRP065812	SRS1152622	control
770_SRP065812	SRS1152624	control
770_SRP065812	SRS1152633	control
770_SRP065812	SRS1152638	control
1785_SRP090547	SRS1716660	control
1785_SRP090547	SRS1716654	case
1785_SRP090547	SRS1716656	case
1785_SRP090547	SRS1716653	case
1785_SRP090547	SRS1716661	control
1785_SRP090547	SRS1716659	control
1683_SRP064418	SRS1097833	case
1683_SRP064418	SRS1097849	control
1683_SRP064418	SRS1097832	case
1683_SRP064418	SRS1097848	control
25_SRP065206	SRS1130974	control
25_SRP065206	SRS1130949	case
25_SRP065206	SRS1130908	case
25_SRP065206	SRS1130972	control
25_SRP065206	SRS1130969	control
25_SRP065206	SRS1130948	case
1786_SRP090547	SRS1716660	control
1786_SRP090547	SRS1716652	case
1786_SRP090547	SRS1716661	control
1786_SRP090547	SRS1716659	control
1786_SRP090547	SRS1716651	case
1786_SRP090547	SRS1716650	case
1913_SRP040418	SRS579420	control
1913_SRP040418	SRS579419	control
1913_SRP040418	SRS579422	case
1913_SRP040418	SRS579421	case
654_SRP070657	SRS1306475	control
654_SRP070657	SRS1306485	control
654_SRP070657	SRS1306495	control
654_SRP070657	SRS1306476	case
654_SRP070657	SRS1306497	case
654_SRP070657	SRS1306486	case
2208_SRP031620	SRS492033	control
2208_SRP031620	SRS492039	control
2208_SRP031620	SRS492047	case
2212_SRP031620	SRS492044	case
2212_SRP031620	SRS492033	control
2212_SRP031620	SRS492039	control
1686_SRP064418	SRS1097847	control
1686_SRP064418	SRS1097835	case
1686_SRP064418	SRS1097846	control
1686_SRP064418	SRS1097834	case
2366_SRP056220	SRS875029	control
2366_SRP056220	SRS875027	control
2366_SRP056220	SRS875026	case
2366_SRP056220	SRS875024	case
2366_SRP056220	SRS875028	control
2366_SRP056220	SRS875025	case
1449_SRP094854	SRS1848086	control
1449_SRP094854	SRS1848085	control
1449_SRP094854	SRS1848083	control
1449_SRP094854	SRS1848335	case
1449_SRP094854	SRS1847992	case
1449_SRP094854	SRS1848084	control
1449_SRP094854	SRS1848352	case
1451_SRP094854	SRS1848376	case
1451_SRP094854	SRS1848374	case
1451_SRP094854	SRS1848086	control
1451_SRP094854	SRS1848085	control
1451_SRP094854	SRS1848083	control
1451_SRP094854	SRS1848375	case
1451_SRP094854	SRS1848356	case
1451_SRP094854	SRS1848084	control
1451_SRP094854	SRS1848353	case
1681_SRP064418	SRS1097849	control
1681_SRP064418	SRS1097838	case
1681_SRP064418	SRS1097839	case
1681_SRP064418	SRS1097848	control
1679_SRP064418	SRS1097849	control
1679_SRP064418	SRS1097842	case
1679_SRP064418	SRS1097843	case
1679_SRP064418	SRS1097848	control
2206_SRP031620	SRS492033	control
2206_SRP031620	SRS492039	control
2206_SRP031620	SRS492038	case
1586_SRP050193	SRS751156	case
1586_SRP050193	SRS751150	control
1586_SRP050193	SRS751155	case
1586_SRP050193	SRS751149	control
2207_SRP031620	SRS492046	case
2207_SRP031620	SRS492033	control
2207_SRP031620	SRS492039	control
2403_SRP098916	SRS1959581	control
2403_SRP098916	SRS1959588	case
2403_SRP098916	SRS1959580	control
2403_SRP098916	SRS1959586	case
2403_SRP098916	SRS1959589	case
2403_SRP098916	SRS1959583	control
59_SRP119557	SRS2572545	case
59_SRP119557	SRS2572556	control
59_SRP119557	SRS2572544	case
59_SRP119557	SRS2572557	control
2822_SRP116042	SRS2456232	control
2822_SRP116042	SRS2456235	case
2822_SRP116042	SRS2456233	control
2822_SRP116042	SRS2456234	case
2393_SRP098916	SRS1959615	control
2393_SRP098916	SRS1959613	control
2393_SRP098916	SRS1959623	case
2393_SRP098916	SRS1959620	case
2393_SRP098916	SRS1959614	control
2393_SRP098916	SRS1959621	case
1705_SRP076879	SRS1520063	control
1705_SRP076879	SRS1520057	control
1705_SRP076879	SRS1520059	case
1705_SRP076879	SRS1520060	case
1705_SRP076879	SRS1520062	control
1705_SRP076879	SRS1520056	control
1705_SRP076879	SRS1520058	case
1705_SRP076879	SRS1520061	case
20_SRP065206	SRS1130913	case
20_SRP065206	SRS1130922	control
20_SRP065206	SRS1130924	control
20_SRP065206	SRS1130917	case
20_SRP065206	SRS1130925	control
20_SRP065206	SRS1130920	case
2211_SRP031620	SRS492040	case
2211_SRP031620	SRS492033	control
2211_SRP031620	SRS492039	control
161_SRP059701	SRS967028	control
161_SRP059701	SRS967025	case
161_SRP059701	SRS967023	case
161_SRP059701	SRS967027	control
2397_SRP098916	SRS1959597	control
2397_SRP098916	SRS1959603	case
2397_SRP098916	SRS1959596	control
2397_SRP098916	SRS1959601	case
2397_SRP098916	SRS1959677	control
2397_SRP098916	SRS1959602	case
1446_SRP094854	SRS1848469	case
1446_SRP094854	SRS1848086	control
1446_SRP094854	SRS1848085	control
1446_SRP094854	SRS1848402	case
1446_SRP094854	SRS1848083	control
1446_SRP094854	SRS1848019	case
1446_SRP094854	SRS1848017	case
1446_SRP094854	SRS1848084	control
1446_SRP094854	SRS1848016	case
1446_SRP094854	SRS1848403	case
1453_SRP094854	SRS1848481	case
1453_SRP094854	SRS1848018	case
1453_SRP094854	SRS1848404	case
1453_SRP094854	SRS1848086	control
1453_SRP094854	SRS1848085	control
1453_SRP094854	SRS1848483	case
1453_SRP094854	SRS1848083	control
1453_SRP094854	SRS1848009	case
1453_SRP094854	SRS1848084	control
1453_SRP094854	SRS1848482	case
1453_SRP094854	SRS1848443	case
591_SRP013773	SRS346192	control
591_SRP013773	SRS346191	control
591_SRP013773	SRS346195	case
591_SRP013773	SRS346196	case
61_SRP119557	SRS2572552	control
61_SRP119557	SRS2572541	case
61_SRP119557	SRS2572553	control
61_SRP119557	SRS2572540	case
2394_SRP098916	SRS1959622	case
2394_SRP098916	SRS1959615	control
2394_SRP098916	SRS1959618	case
2394_SRP098916	SRS1959613	control
2394_SRP098916	SRS1959614	control
2394_SRP098916	SRS1959619	case
1687_SRP064418	SRS1097847	control
1687_SRP064418	SRS1097846	control
1687_SRP064418	SRS1097838	case
1687_SRP064418	SRS1097839	case
60_SRP119557	SRS2572554	control
60_SRP119557	SRS2572542	case
60_SRP119557	SRS2572555	control
60_SRP119557	SRS2572543	case
1026_SRP067492	SRS1210872	control
1026_SRP067492	SRS1210871	case
1026_SRP067492	SRS1210869	case
1026_SRP067492	SRS1210870	control
1025_SRP067492	SRS1210880	control
1025_SRP067492	SRS1210878	case
1025_SRP067492	SRS1210879	control
1025_SRP067492	SRS1210877	case
2775_SRP049988	SRS746064	control
2775_SRP049988	SRS746077	case
2775_SRP049988	SRS746070	case
2775_SRP049988	SRS746062	control
2775_SRP049988	SRS746069	case
2775_SRP049988	SRS746068	case
2775_SRP049988	SRS746056	control
2775_SRP049988	SRS746075	case
2775_SRP049988	SRS746058	control
2775_SRP049988	SRS746073	case
2775_SRP049988	SRS746066	control
2775_SRP049988	SRS746074	case
2775_SRP049988	SRS746063	control
2775_SRP049988	SRS746059	control
2775_SRP049988	SRS746057	control
2775_SRP049988	SRS746072	case
2775_SRP049988	SRS746061	control
2775_SRP049988	SRS746067	case
2775_SRP049988	SRS746078	case
2775_SRP049988	SRS746060	control
2775_SRP049988	SRS746071	case
2775_SRP049988	SRS746065	control
2775_SRP049988	SRS746076	case
2252_SRP051320	SRS796761	control
2252_SRP051320	SRS796762	control
2252_SRP051320	SRS796764	case
2252_SRP051320	SRS796765	control
2252_SRP051320	SRS796766	control
2252_SRP051320	SRS796763	case
2761_SRP057074	SRS901647	control
2761_SRP057074	SRS901646	control
2761_SRP057074	SRS901650	case
2761_SRP057074	SRS901643	control
2761_SRP057074	SRS901649	case
2761_SRP057074	SRS901648	control
2761_SRP057074	SRS901645	control
2761_SRP057074	SRS901644	control
1908_SRP042186	SRS618305	control
1908_SRP042186	SRS618308	case
1908_SRP042186	SRS618307	control
1908_SRP042186	SRS618306	control
1908_SRP042186	SRS618310	case
1908_SRP042186	SRS618309	case
1906_SRP042186	SRS618294	case
1906_SRP042186	SRS618290	control
1906_SRP042186	SRS618292	control
1906_SRP042186	SRS618291	control
1906_SRP042186	SRS618293	case
1906_SRP042186	SRS618295	case
2443_SRP092641	SRS2313701	control
2443_SRP092641	SRS2313706	case
2443_SRP092641	SRS2313700	control
2443_SRP092641	SRS2313707	case
2443_SRP092641	SRS2313705	case
2443_SRP092641	SRS2313699	control
960_SRP111173	SRS2339227	control
960_SRP111173	SRS2339228	control
960_SRP111173	SRS2339231	case
960_SRP111173	SRS2339232	case
960_SRP111173	SRS2339230	case
960_SRP111173	SRS2339229	control
1238_SRP110248	SRS2308365	control
1238_SRP110248	SRS2308362	control
1238_SRP110248	SRS2308361	case
1238_SRP110248	SRS2308359	case
1238_SRP110248	SRS2308360	case
1238_SRP110248	SRS2308364	control
1420_SRP097129	SRS1926278	control
1420_SRP097129	SRS1926277	control
1420_SRP097129	SRS1926279	case
1420_SRP097129	SRS1926280	case
2144_SRP058856	SRS949255	control
2144_SRP058856	SRS949247	control
2144_SRP058856	SRS949254	control
2144_SRP058856	SRS949245	case
2144_SRP058856	SRS949243	control
2144_SRP058856	SRS949253	control
2144_SRP058856	SRS949241	case
2144_SRP058856	SRS949240	case
2144_SRP058856	SRS949244	case
2144_SRP058856	SRS949246	control
2144_SRP058856	SRS949252	control
2144_SRP058856	SRS949242	control
632_SRP070122	SRS1302332	case
632_SRP070122	SRS1302331	control
632_SRP070122	SRS1302330	case
632_SRP070122	SRS1302334	control
981_SRP090830	SRS1727612	case
981_SRP090830	SRS1727608	control
981_SRP090830	SRS1727609	control
981_SRP090830	SRS1727611	case
981_SRP090830	SRS1727610	control
981_SRP090830	SRS1727613	case
2442_SRP092641	SRS2313701	control
2442_SRP092641	SRS2313704	case
2442_SRP092641	SRS2313702	case
2442_SRP092641	SRS2313700	control
2442_SRP092641	SRS2313699	control
2442_SRP092641	SRS2313703	case
198_SRP075959	SRS1476314	case
198_SRP075959	SRS1476313	case
198_SRP075959	SRS1476315	case
198_SRP075959	SRS1476312	control
198_SRP075959	SRS1476311	control
198_SRP075959	SRS1476310	control
956_SRP111173	SRS2339248	case
956_SRP111173	SRS2339247	control
956_SRP111173	SRS2339249	case
956_SRP111173	SRS2339245	control
956_SRP111173	SRS2339250	case
956_SRP111173	SRS2339246	control
1840_SRP063860	SRS1069948	case
1840_SRP063860	SRS1069966	control
1840_SRP063860	SRS1069953	case
1840_SRP063860	SRS1069959	case
1840_SRP063860	SRS1069955	case
1840_SRP063860	SRS1069978	control
1840_SRP063860	SRS1069962	case
1840_SRP063860	SRS1069976	control
1840_SRP063860	SRS1069970	control
1840_SRP063860	SRS1069957	case
1840_SRP063860	SRS1069969	control
1840_SRP063860	SRS1069960	case
1840_SRP063860	SRS1069968	control
1840_SRP063860	SRS1069974	control
1840_SRP063860	SRS1069973	control
1840_SRP063860	SRS1069956	case
1840_SRP063860	SRS1069958	case
1840_SRP063860	SRS1069977	control
1840_SRP063860	SRS1069965	control
1840_SRP063860	SRS1069979	control
1840_SRP063860	SRS1069972	control
1840_SRP063860	SRS1069964	control
1840_SRP063860	SRS1069961	case
1840_SRP063860	SRS1069951	case
1840_SRP063860	SRS1069954	case
1840_SRP063860	SRS1069952	case
1840_SRP063860	SRS1069967	control
1840_SRP063860	SRS1069971	control
1840_SRP063860	SRS1069963	case
1840_SRP063860	SRS1069949	case
1840_SRP063860	SRS1069975	control
1840_SRP063860	SRS1069950	case
2664_SRP064832	SRS1114761	control
2664_SRP064832	SRS1114781	control
2664_SRP064832	SRS1114771	control
2664_SRP064832	SRS1114774	case
2664_SRP064832	SRS1114764	case
2664_SRP064832	SRS1114784	case
2659_SRP064832	SRS1114761	control
2659_SRP064832	SRS1114781	control
2659_SRP064832	SRS1114771	control
2659_SRP064832	SRS1114789	case
2659_SRP064832	SRS1114779	case
2659_SRP064832	SRS1114769	case
955_SRP111173	SRS2339267	case
955_SRP111173	SRS2339268	case
955_SRP111173	SRS2339263	control
955_SRP111173	SRS2339266	case
955_SRP111173	SRS2339265	control
955_SRP111173	SRS2339264	control
1490_SRP095402	SRS1871727	case
1490_SRP095402	SRS1871754	case
1490_SRP095402	SRS1871737	control
1490_SRP095402	SRS1871728	case
1490_SRP095402	SRS1871746	case
1490_SRP095402	SRS1871738	control
1490_SRP095402	SRS1871756	control
1490_SRP095402	SRS1871730	control
2316_SRP057452	SRS914170	case
2316_SRP057452	SRS914169	control
2316_SRP057452	SRS914171	case
2316_SRP057452	SRS914168	control
1210_SRP124332	SRS2665984	control
1210_SRP124332	SRS2665985	case
1210_SRP124332	SRS2665982	control
1210_SRP124332	SRS2665983	case
2760_SRP057074	SRS901652	case
2760_SRP057074	SRS901647	control
2760_SRP057074	SRS901646	control
2760_SRP057074	SRS901643	control
2760_SRP057074	SRS901648	control
2760_SRP057074	SRS901645	control
2760_SRP057074	SRS901644	control
2760_SRP057074	SRS901651	case
789_SRP097000	SRS1928048	case
789_SRP097000	SRS1928045	control
789_SRP097000	SRS1928046	control
789_SRP097000	SRS1928049	case
789_SRP097000	SRS1928047	control
789_SRP097000	SRS1928050	case
1644_SRP094059	SRS1828786	control
1644_SRP094059	SRS1828789	case
1644_SRP094059	SRS1828788	case
1644_SRP094059	SRS1828785	control
1644_SRP094059	SRS1823698	control
1644_SRP094059	SRS1828787	case
2663_SRP064832	SRS1114761	control
2663_SRP064832	SRS1114781	control
2663_SRP064832	SRS1114771	control
2663_SRP064832	SRS1114768	case
2663_SRP064832	SRS1114778	case
2663_SRP064832	SRS1114788	case
2661_SRP064832	SRS1114761	control
2661_SRP064832	SRS1114781	control
2661_SRP064832	SRS1114771	control
2661_SRP064832	SRS1114783	case
2661_SRP064832	SRS1114773	case
2661_SRP064832	SRS1114763	case
21_SRP065206	SRS1130974	control
21_SRP065206	SRS1130910	case
21_SRP065206	SRS1130954	case
21_SRP065206	SRS1130907	case
21_SRP065206	SRS1130972	control
21_SRP065206	SRS1130969	control
1513_SRP066934	SRS1187438	case
1513_SRP066934	SRS1187433	case
1513_SRP066934	SRS1187435	case
1513_SRP066934	SRS1187420	control
1513_SRP066934	SRS1187421	control
1513_SRP066934	SRS1187423	control
1771_SRP066171	SRS1162693	case
1771_SRP066171	SRS1162692	case
1771_SRP066171	SRS1162717	control
1771_SRP066171	SRS1162694	control
1771_SRP066171	SRS1162712	control
1771_SRP066171	SRS1162713	control
1771_SRP066171	SRS1162695	control
1771_SRP066171	SRS1162716	control
1771_SRP066171	SRS1162711	control
125_SRP029434	SRS475471	control
125_SRP029434	SRS475470	case
125_SRP029434	SRS475472	case
1386_SRP058698	SRS945638	case
1386_SRP058698	SRS945636	case
1386_SRP058698	SRS945155	control
1386_SRP058698	SRS945625	control
1386_SRP058698	SRS945156	control
1386_SRP058698	SRS945637	case
2985_ERP018533	ERS1421236	control
2985_ERP018533	ERS1421242	control
2985_ERP018533	ERS1421235	case
2985_ERP018533	ERS1421241	case
146_SRP065678	SRS1145421	case
146_SRP065678	SRS1145418	control
146_SRP065678	SRS1145422	case
146_SRP065678	SRS1145419	control
146_SRP065678	SRS1145420	control
146_SRP065678	SRS1145423	case
2630_SRP057721	SRS923845	case
2630_SRP057721	SRS923851	control
2630_SRP057721	SRS923848	control
2630_SRP057721	SRS923843	case
2630_SRP057721	SRS923841	case
2630_SRP057721	SRS923854	control
2630_SRP057721	SRS923853	control
2630_SRP057721	SRS923844	case
1917_SRP040418	SRS579420	control
1917_SRP040418	SRS579430	case
1917_SRP040418	SRS579419	control
1917_SRP040418	SRS579429	case
877_SRP045695	SRS687944	case
877_SRP045695	SRS687943	case
877_SRP045695	SRS687941	control
877_SRP045695	SRS687942	case
877_SRP045695	SRS687940	control
877_SRP045695	SRS687939	control
880_SRP095523	SRS1874593	control
880_SRP095523	SRS1874598	case
880_SRP095523	SRS1874597	control
880_SRP095523	SRS1874594	control
880_SRP095523	SRS1874601	case
880_SRP095523	SRS1874599	case
880_SRP095523	SRS1874595	control
880_SRP095523	SRS1874602	case
880_SRP095523	SRS1874600	case
880_SRP095523	SRS1874596	control
196_SRP066992	SRS1190382	case
196_SRP066992	SRS1190381	case
196_SRP066992	SRS1190386	control
196_SRP066992	SRS1190385	control
2629_SRP057721	SRS923851	control
2629_SRP057721	SRS923848	control
2629_SRP057721	SRS923854	control
2629_SRP057721	SRS923853	control
2629_SRP057721	SRS923842	case
2629_SRP057721	SRS923847	case
2629_SRP057721	SRS923846	case
2629_SRP057721	SRS923840	case
1770_SRP066171	SRS1162708	case
1770_SRP066171	SRS1162710	case
1770_SRP066171	SRS1162717	control
1770_SRP066171	SRS1162712	control
1770_SRP066171	SRS1162713	control
1770_SRP066171	SRS1162709	case
1770_SRP066171	SRS1162716	control
1770_SRP066171	SRS1162711	control
2632_SRP044187	SRS655784	control
2632_SRP044187	SRS655793	case
2632_SRP044187	SRS655790	control
2632_SRP044187	SRS655783	control
2632_SRP044187	SRS655788	control
2632_SRP044187	SRS655785	control
2632_SRP044187	SRS655792	control
2632_SRP044187	SRS655791	case
2632_SRP044187	SRS655794	case
2640_SRP090658	SRS1720198	case
2640_SRP090658	SRS1720195	control
2640_SRP090658	SRS1720197	control
2640_SRP090658	SRS1720200	case
2640_SRP090658	SRS1720194	control
2640_SRP090658	SRS1720201	case
354_SRP070636	SRS1305836	control
354_SRP070636	SRS1305837	case
354_SRP070636	SRS1305838	control
354_SRP070636	SRS1305835	case
962_SRP111173	SRS2339241	control
962_SRP111173	SRS2339238	case
962_SRP111173	SRS2339237	case
962_SRP111173	SRS2339240	control
962_SRP111173	SRS2339239	control
962_SRP111173	SRS2339236	case
2343_SRP098799	SRS1956616	case
2343_SRP098799	SRS1956614	case
2343_SRP098799	SRS1956615	control
2343_SRP098799	SRS1956613	control
322_SRP076126	SRS1483474	case
322_SRP076126	SRS1483475	control
322_SRP076126	SRS1483473	case
322_SRP076126	SRS1483476	control
2363_SRP052856	SRS827719	case
2363_SRP052856	SRS827720	case
2363_SRP052856	SRS827724	control
2363_SRP052856	SRS827722	control
2363_SRP052856	SRS827718	control
2363_SRP052856	SRS827723	case
1443_SRP102725	SRS2087492	case
1443_SRP102725	SRS2087493	control
1443_SRP102725	SRS2087491	case
1443_SRP102725	SRS2087495	control
1443_SRP102725	SRS2087490	case
1443_SRP102725	SRS2087494	control
2241_SRP061772	SRS1016321	control
2241_SRP061772	SRS1016317	case
2241_SRP061772	SRS1016320	control
2241_SRP061772	SRS1016319	control
2241_SRP061772	SRS1016316	case
2241_SRP061772	SRS1016318	case
2759_SRP057074	SRS901647	control
2759_SRP057074	SRS901642	case
2759_SRP057074	SRS901646	control
2759_SRP057074	SRS901643	control
2759_SRP057074	SRS901648	control
2759_SRP057074	SRS901641	case
2759_SRP057074	SRS901645	control
2759_SRP057074	SRS901644	control
2053_SRP068046	SRS1234132	control
2053_SRP068046	SRS1234133	control
2053_SRP068046	SRS1234131	control
2053_SRP068046	SRS1234138	case
2927_SRP078450	SRS1561727	control
2927_SRP078450	SRS1561730	control
2927_SRP078450	SRS1561725	control
2927_SRP078450	SRS1561766	control
2927_SRP078450	SRS1561745	case
2927_SRP078450	SRS1561731	control
2927_SRP078450	SRS1561743	case
2927_SRP078450	SRS1561733	control
2927_SRP078450	SRS1561729	control
2927_SRP078450	SRS1561763	control
2927_SRP078450	SRS1561721	control
2927_SRP078450	SRS1561765	control
2927_SRP078450	SRS1561723	control
2927_SRP078450	SRS1561732	control
2927_SRP078450	SRS1561726	control
2927_SRP078450	SRS1561728	control
2927_SRP078450	SRS1561737	control
2927_SRP078450	SRS1561744	case
2927_SRP078450	SRS1561764	control
2927_SRP078450	SRS1561722	control
2927_SRP078450	SRS1561736	control
2927_SRP078450	SRS1561735	control
2927_SRP078450	SRS1561734	control
2927_SRP078450	SRS1561738	control
2927_SRP078450	SRS1561724	control
1918_SRP040418	SRS579420	control
1918_SRP040418	SRS579419	control
1918_SRP040418	SRS579435	case
1918_SRP040418	SRS579436	case
1987_SRP049650	SRS1409671	control
1987_SRP049650	SRS1409669	case
1987_SRP049650	SRS1409668	case
1987_SRP049650	SRS1409670	control
74_SRP058375	SRS937772	control
74_SRP058375	SRS937779	control
74_SRP058375	SRS937780	control
74_SRP058375	SRS937770	case
74_SRP058375	SRS937769	case
74_SRP058375	SRS937771	case
1444_SRP102725	SRS2087488	case
1444_SRP102725	SRS2087493	control
1444_SRP102725	SRS2087495	control
1444_SRP102725	SRS2087487	case
1444_SRP102725	SRS2087494	control
1444_SRP102725	SRS2087489	case
1647_SRP042158	SRS616813	control
1647_SRP042158	SRS616823	case
1647_SRP042158	SRS616800	control
1647_SRP042158	SRS616828	control
1647_SRP042158	SRS616815	control
1647_SRP042158	SRS616799	control
1647_SRP042158	SRS616809	case
1647_SRP042158	SRS616801	control
1647_SRP042158	SRS616827	control
1647_SRP042158	SRS616829	control
1647_SRP042158	SRS616837	case
1647_SRP042158	SRS616814	control
1772_SRP066171	SRS1162693	case
1772_SRP066171	SRS1162692	case
1772_SRP066171	SRS1162715	case
1772_SRP066171	SRS1162717	control
1772_SRP066171	SRS1162694	control
1772_SRP066171	SRS1162712	control
1772_SRP066171	SRS1162713	control
1772_SRP066171	SRS1162695	control
1772_SRP066171	SRS1162716	control
1772_SRP066171	SRS1162714	case
1772_SRP066171	SRS1162711	control
1657_SRP042158	SRS616813	control
1657_SRP042158	SRS616823	case
1657_SRP042158	SRS616800	control
1657_SRP042158	SRS616828	control
1657_SRP042158	SRS616815	control
1657_SRP042158	SRS616838	case
1657_SRP042158	SRS616810	case
1657_SRP042158	SRS616799	control
1657_SRP042158	SRS616809	case
1657_SRP042158	SRS616801	control
1657_SRP042158	SRS616827	control
1657_SRP042158	SRS616829	control
1657_SRP042158	SRS616837	case
1657_SRP042158	SRS616824	case
1657_SRP042158	SRS616814	control
1648_SRP042158	SRS616813	control
1648_SRP042158	SRS616800	control
1648_SRP042158	SRS616828	control
1648_SRP042158	SRS616815	control
1648_SRP042158	SRS616838	case
1648_SRP042158	SRS616810	case
1648_SRP042158	SRS616799	control
1648_SRP042158	SRS616801	control
1648_SRP042158	SRS616827	control
1648_SRP042158	SRS616829	control
1648_SRP042158	SRS616824	case
1648_SRP042158	SRS616814	control
1557_SRP092004	SRS1757821	control
1557_SRP092004	SRS1757818	case
1557_SRP092004	SRS1757820	case
1557_SRP092004	SRS1757823	control
1557_SRP092004	SRS1757822	control
1557_SRP092004	SRS1757819	case
2606_SRP056109	SRS873003	case
2606_SRP056109	SRS873013	control
2606_SRP056109	SRS873014	control
2606_SRP056109	SRS873001	case
2606_SRP056109	SRS873012	control
2606_SRP056109	SRS873015	control
2606_SRP056109	SRS873002	case
2606_SRP056109	SRS873000	case
2052_SRP068046	SRS1234132	control
2052_SRP068046	SRS1234133	control
2052_SRP068046	SRS1234137	case
2052_SRP068046	SRS1234131	control
2342_SRP098799	SRS1956611	control
2342_SRP098799	SRS1956609	control
2342_SRP098799	SRS1956612	case
2342_SRP098799	SRS1956610	case
1537_SRP092004	SRS1757896	case
1537_SRP092004	SRS1757897	case
1537_SRP092004	SRS1757899	control
1537_SRP092004	SRS1757900	control
1537_SRP092004	SRS1757901	control
1537_SRP092004	SRS1757898	case
1554_SRP092004	SRS1757821	control
1554_SRP092004	SRS1757825	case
1554_SRP092004	SRS1757823	control
1554_SRP092004	SRS1757822	control
1554_SRP092004	SRS1757824	case
1554_SRP092004	SRS1757826	case
2623_SRP097673	SRS1936148	control
2623_SRP097673	SRS1936152	case
2623_SRP097673	SRS1936150	case
1150_SRP061380	SRS1008587	case
1150_SRP061380	SRS1008594	control
1150_SRP061380	SRS1008588	case
1150_SRP061380	SRS1008593	control
1150_SRP061380	SRS1008595	control
1150_SRP061380	SRS1008589	case
1467_SRP100936	SRS2016362	control
1467_SRP100936	SRS2016364	case
1467_SRP100936	SRS2016366	case
1467_SRP100936	SRS2016363	control
1467_SRP100936	SRS2016365	case
1467_SRP100936	SRS2016361	control
2720_SRP039598	SRS567908	case
2720_SRP039598	SRS567906	control
2720_SRP039598	SRS567899	control
2720_SRP039598	SRS567902	case
2720_SRP039598	SRS567901	case
2720_SRP039598	SRS567907	case
2720_SRP039598	SRS567905	control
2720_SRP039598	SRS567900	control
1538_SRP092004	SRS1757889	case
1538_SRP092004	SRS1757888	case
1538_SRP092004	SRS1757884	control
1538_SRP092004	SRS1757881	control
1538_SRP092004	SRS1757887	case
1538_SRP092004	SRS1757883	control
2896_SRP091854	SRS1754192	control
2896_SRP091854	SRS1754230	control
2896_SRP091854	SRS1754194	control
2896_SRP091854	SRS1754215	control
2896_SRP091854	SRS1754217	case
2896_SRP091854	SRS1754258	control
2896_SRP091854	SRS1754212	control
2896_SRP091854	SRS1754191	control
2896_SRP091854	SRS1754187	control
2896_SRP091854	SRS1754205	control
2896_SRP091854	SRS1754233	control
2896_SRP091854	SRS1754203	control
2896_SRP091854	SRS1754232	control
2896_SRP091854	SRS1754208	control
2896_SRP091854	SRS1754216	case
2896_SRP091854	SRS1754186	control
2896_SRP091854	SRS1754259	control
2896_SRP091854	SRS1754189	control
2896_SRP091854	SRS1754193	control
2896_SRP091854	SRS1754231	control
2896_SRP091854	SRS1754195	control
2896_SRP091854	SRS1754213	control
2896_SRP091854	SRS1754214	control
2896_SRP091854	SRS1754184	control
2896_SRP091854	SRS1754206	control
2486_ERP014062	ERS1047291	case
2486_ERP014062	ERS1047290	case
2486_ERP014062	ERS1047294	control
2486_ERP014062	ERS1047295	control
1766_SRP066171	SRS1162715	case
1766_SRP066171	SRS1162717	control
1766_SRP066171	SRS1162712	control
1766_SRP066171	SRS1162713	control
1766_SRP066171	SRS1162716	control
1766_SRP066171	SRS1162714	case
1766_SRP066171	SRS1162711	control
2823_SRP045905	SRS692680	control
2823_SRP045905	SRS692675	case
2823_SRP045905	SRS692679	control
2823_SRP045905	SRS692674	case
2823_SRP045905	SRS692678	control
2823_SRP045905	SRS692671	case
2823_SRP045905	SRS692676	case
2823_SRP045905	SRS692681	control
2823_SRP045905	SRS692672	case
2823_SRP045905	SRS692673	case
2823_SRP045905	SRS692677	case
282_SRP072507	SRS1366414	case
282_SRP072507	SRS1366416	control
282_SRP072507	SRS1366415	case
282_SRP072507	SRS1366417	control
1151_SRP061380	SRS1008587	control
1151_SRP061380	SRS1008588	control
1151_SRP061380	SRS1008586	case
1151_SRP061380	SRS1008585	case
1151_SRP061380	SRS1008584	case
1151_SRP061380	SRS1008589	control
982_SRP090830	SRS1727604	control
982_SRP090830	SRS1727602	control
982_SRP090830	SRS1727608	case
982_SRP090830	SRS1727609	case
982_SRP090830	SRS1727610	case
982_SRP090830	SRS1727603	control
2452_SRP115557	SRS2434337	case
2452_SRP115557	SRS2434331	control
2452_SRP115557	SRS2434334	control
2452_SRP115557	SRS2434336	case
2452_SRP115557	SRS2434333	control
2452_SRP115557	SRS2434335	case
1666_SRP066083	SRS1158996	control
1666_SRP066083	SRS1158964	case
1666_SRP066083	SRS1158962	case
1666_SRP066083	SRS1158991	control
1666_SRP066083	SRS1158966	case
1666_SRP066083	SRS1158993	control
1666_SRP066083	SRS1158995	control
1666_SRP066083	SRS1158963	case
1666_SRP066083	SRS1158968	case
1666_SRP066083	SRS1158965	case
1666_SRP066083	SRS1158997	control
1666_SRP066083	SRS1158994	control
2448_SRP055981	SRS866400	case
2448_SRP055981	SRS866405	control
2448_SRP055981	SRS866399	control
2448_SRP055981	SRS866693	case
2448_SRP055981	SRS866691	case
2727_SRP092975	SRS1791294	control
2727_SRP092975	SRS1791303	case
2727_SRP092975	SRS1791293	control
2351_SRP059217	SRS956182	case
2351_SRP059217	SRS956188	control
2351_SRP059217	SRS956178	case
2351_SRP059217	SRS956189	control
2351_SRP059217	SRS956180	case
2351_SRP059217	SRS956181	case
2351_SRP059217	SRS956190	control
2351_SRP059217	SRS956187	control
1170_SRP033401	SRS509615	case
1170_SRP033401	SRS509616	control
1170_SRP033401	SRS509614	case
1170_SRP033401	SRS509617	control
604_SRP093655	SRS1803330	case
604_SRP093655	SRS1803327	control
604_SRP093655	SRS1803328	control
604_SRP093655	SRS1803325	control
604_SRP093655	SRS1803324	control
604_SRP093655	SRS1803329	case
2931_SRP071088	SRS1943189	control
2931_SRP071088	SRS1943184	control
2931_SRP071088	SRS1943187	case
2931_SRP071088	SRS1320250	control
2931_SRP071088	SRS1943188	case
2931_SRP071088	SRS1320249	control
129_SRP041826	SRS604725	control
129_SRP041826	SRS604720	case
129_SRP041826	SRS604718	case
129_SRP041826	SRS604716	case
129_SRP041826	SRS604723	control
129_SRP041826	SRS604717	case
129_SRP041826	SRS604722	control
129_SRP041826	SRS604719	case
129_SRP041826	SRS604724	control
129_SRP041826	SRS604721	control
2612_SRP111818	SRS2350937	case
2612_SRP111818	SRS2350920	case
2612_SRP111818	SRS2350919	control
2612_SRP111818	SRS2350923	control
2612_SRP111818	SRS2350932	case
2612_SRP111818	SRS2350929	control
2612_SRP111818	SRS2350935	control
2612_SRP111818	SRS2350925	case
361_SRP094423	SRS1830186	control
361_SRP094423	SRS1830183	control
361_SRP094423	SRS1830178	case
361_SRP094423	SRS1830181	case
361_SRP094423	SRS1830180	control
361_SRP094423	SRS1830177	control
361_SRP094423	SRS1830189	control
361_SRP094423	SRS1830190	case
361_SRP094423	SRS1830187	case
361_SRP094423	SRS1830184	case
874_SRP064735	SRS1112106	case
874_SRP064735	SRS1112108	case
874_SRP064735	SRS1112110	control
874_SRP064735	SRS1112112	control
1518_SRP075717	SRS1467176	case
1518_SRP075717	SRS1467178	control
1518_SRP075717	SRS1467177	case
1518_SRP075717	SRS1467180	case
1518_SRP075717	SRS1467167	control
1518_SRP075717	SRS1467174	control
1518_SRP075717	SRS1482840	control
1518_SRP075717	SRS1482836	control
2932_SRP071088	SRS1943189	control
2932_SRP071088	SRS1943184	control
2932_SRP071088	SRS1320253	case
2932_SRP071088	SRS1320252	case
2932_SRP071088	SRS1320250	control
2932_SRP071088	SRS1320249	control
790_SRP071170	SRS1324058	control
790_SRP071170	SRS1324056	control
790_SRP071170	SRS1324051	case
790_SRP071170	SRS1324061	control
790_SRP071170	SRS1324060	control
790_SRP071170	SRS1324054	case
790_SRP071170	SRS1324055	case
790_SRP071170	SRS1324062	control
790_SRP071170	SRS1324049	case
790_SRP071170	SRS1324057	control
790_SRP071170	SRS1324050	case
790_SRP071170	SRS1324052	case
790_SRP071170	SRS1324059	control
790_SRP071170	SRS1324053	case
2485_ERP014062	ERS1047286	case
2485_ERP014062	ERS1047296	case
2485_ERP014062	ERS1047294	control
2485_ERP014062	ERS1047295	control
2782_SRP095403	SRS1871773	control
2782_SRP095403	SRS1871772	control
2782_SRP095403	SRS1871781	case
2782_SRP095403	SRS1871779	case
2824_SRP045905	SRS692680	control
2824_SRP045905	SRS692682	case
2824_SRP045905	SRS692679	control
2824_SRP045905	SRS692678	control
2824_SRP045905	SRS692683	case
2824_SRP045905	SRS692685	case
2824_SRP045905	SRS692681	control
2824_SRP045905	SRS692684	case
571_SRP062958	SRS1047510	control
571_SRP062958	SRS1047511	control
571_SRP062958	SRS1047512	control
571_SRP062958	SRS1047509	case
571_SRP062958	SRS1047508	case
571_SRP062958	SRS1047507	case
2933_SRP071088	SRS1943189	control
2933_SRP071088	SRS1320251	case
2933_SRP071088	SRS1943184	control
2933_SRP071088	SRS1320247	case
2933_SRP071088	SRS1320250	control
2933_SRP071088	SRS1320249	control
2017_SRP061634	SRS1013503	control
2017_SRP061634	SRS1013502	control
2017_SRP061634	SRS1013500	case
2017_SRP061634	SRS1013498	case
2017_SRP061634	SRS1013501	control
2017_SRP061634	SRS1013499	case
2227_SRP090090	SRS1701600	case
2227_SRP090090	SRS1701598	control
2227_SRP090090	SRS1701601	case
2227_SRP090090	SRS1701599	control
1171_SRP035864	SRS543679	control
1171_SRP035864	SRS543675	case
1171_SRP035864	SRS543676	case
1171_SRP035864	SRS543682	control
1171_SRP035864	SRS543680	control
1171_SRP035864	SRS543681	control
1171_SRP035864	SRS543674	case
1171_SRP035864	SRS543678	case
1171_SRP035864	SRS543677	case
879_SRP095523	SRS1874608	case
879_SRP095523	SRS1874605	control
879_SRP095523	SRS1874610	case
879_SRP095523	SRS1874603	control
879_SRP095523	SRS1874606	control
879_SRP095523	SRS1874607	control
879_SRP095523	SRS1874611	case
879_SRP095523	SRS1874609	case
879_SRP095523	SRS1874604	control
879_SRP095523	SRS1874612	case
1842_SRP045570	SRS685984	control
1842_SRP045570	SRS685978	control
1842_SRP045570	SRS685982	case
1842_SRP045570	SRS685979	case
1842_SRP045570	SRS685988	case
1842_SRP045570	SRS685987	control
1842_SRP045570	SRS685985	case
1842_SRP045570	SRS685981	control
1515_SRP075717	SRS1467178	control
1515_SRP075717	SRS1482838	case
1515_SRP075717	SRS1482845	case
1515_SRP075717	SRS1467167	control
1515_SRP075717	SRS1467174	control
1515_SRP075717	SRS1482847	case
1515_SRP075717	SRS1482842	case
1515_SRP075717	SRS1482840	control
1515_SRP075717	SRS1482836	control
2987_ERP018533	ERS1421238	case
2987_ERP018533	ERS1421236	control
2987_ERP018533	ERS1421242	control
2987_ERP018533	ERS1421244	case
2986_ERP018533	ERS1421236	control
2986_ERP018533	ERS1421237	case
2986_ERP018533	ERS1421243	case
2986_ERP018533	ERS1421242	control
1228_SRP045569	SRS685963	control
1228_SRP045569	SRS685958	case
1228_SRP045569	SRS685966	control
1228_SRP045569	SRS685961	case
1228_SRP045569	SRS685957	case
1228_SRP045569	SRS685965	control
1228_SRP045569	SRS685959	case
1228_SRP045569	SRS685962	control
1228_SRP045569	SRS685964	control
1228_SRP045569	SRS685967	control
1228_SRP045569	SRS685956	case
1228_SRP045569	SRS685960	case
1843_SRP045570	SRS685980	case
1843_SRP045570	SRS685984	control
1843_SRP045570	SRS685978	control
1843_SRP045570	SRS685986	case
1843_SRP045570	SRS685983	case
1843_SRP045570	SRS685989	case
1843_SRP045570	SRS685987	control
1843_SRP045570	SRS685981	control
985_SRP120383	SRS2607092	case
985_SRP120383	SRS2607093	case
985_SRP120383	SRS2607087	control
985_SRP120383	SRS2607089	control
985_SRP120383	SRS2607091	control
985_SRP120383	SRS2607090	control
985_SRP120383	SRS2607088	control
985_SRP120383	SRS2607094	case
985_SRP120383	SRS2607099	case
984_SRP120383	SRS2607097	case
984_SRP120383	SRS2607087	control
984_SRP120383	SRS2607089	control
984_SRP120383	SRS2607091	control
984_SRP120383	SRS2607098	case
984_SRP120383	SRS2607090	control
984_SRP120383	SRS2607088	control
984_SRP120383	SRS2607095	case
984_SRP120383	SRS2607096	case
