# Supplementary material for: Transcriptional Inhibition of Host Viral Entry Proteins as a Therapeutic Strategy for SARS-CoV-2
Source: Preprints.org preprint supplement (doi:10.20944/preprints202003.0360.v1), 2020-03-24
Supplement: Supplementary file 7 [file Supplementary_Table_6_CTSL_ConnectivityMap_hits.xlsx]

## Sheet: AllTissues_testout_connectivity
Target gene	Cell line	p-value (any dosage)	p-value (dosage less than 1uM)	p-value (dosage 0.5uM to 2uM)	p-value (dosage less than 0.5uM)	p-value (dosage 0.2uM to 1uM)	DMSO median z-score	median z-score, any dosage	median z-score (dosage less than 1uM)	median z-score (dosage 0.5uM to 2uM)	median z-score (dosage less than 0.5uM)	median z-score (dosage 0.2uM to 1uM)	Compound ID	Compound name	Notes
CTSL	HA1E	3.00383e-179	NA	NA	NA	NA	0.0294	-1.4778	NA	NA	NA	NA	BRD-K50691590	bortezomib	*** In our experience, bortezomib and MG-132 show up the top of the list for every gene, and should be ignored for repurposing purposes
CTSL	PC3	7.74657e-122	NA	NA	NA	NA	-0.0109	-1.1642	NA	NA	NA	NA	BRD-K50691590	bortezomib
CTSL	PC3	2.51105e-118	NA	NA	NA	NA	-0.0109	-1.2038	NA	NA	NA	NA	BRD-K60230970	MG-132
CTSL	HA1E	6.60065e-100	NA	NA	NA	NA	0.0294	-0.958	NA	NA	NA	NA	BRD-K60230970	MG-132
CTSL	A375	1.47408e-87	NA	NA	NA	NA	0.0424	-1.0962	NA	NA	NA	NA	BRD-K50691590	bortezomib
CTSL	A375	4.34754e-54	NA	NA	NA	NA	0.0424	-0.77255	NA	NA	NA	NA	BRD-K60230970	MG-132
CTSL	MCF7	2.67529e-38	3.05626e-11	1.07967e-19	1.07967e-19	4.11741e-09	-0.0333	1.5571	2.0316	1.5567	1.5567	1.7069	BRD-K79090631	CGP-60474
CTSL	HT29	7.8632e-29	9.124e-08	3.16114e-14	3.16114e-14	4.78614e-08	-0.0918	1.2042	1.14215	1.1353	1.1353	1.4886	BRD-K49865102	PD-0325901
CTSL	PC3	4.30774e-23	7.31875e-08	1.99337e-11	1.99337e-11	2.7181e-07	-0.0109	1.4197	2.5389	1.6451	1.6451	1.3438	BRD-K79090631	CGP-60474
CTSL	MCF7	7.59004e-17	0.00176168	5.31412e-09	5.31412e-09	7.50717e-05	-0.0333	2.0537	1.45475	2.0426	2.0426	2.74365	BRD-K13662825	dinaciclib
CTSL	HT29	1.16921e-14	0.000671496	5.11305e-07	5.11305e-07	0.0011634	-0.0918	1.5337	1.5781	1.24975	1.24975	1.43545	BRD-K86797399	SB-939
CTSL	A375	7.24474e-14	0.00454273	1.13414e-08	1.13414e-08	0.00163243	0.0424	-1.2843	-1.3083	-1.3333	-1.3333	-1.0725	BRD-K09951645	dabrafenib
CTSL	A549	1.01694e-13	0.000763999	0.000141179	0.000141179	0.00141744	0.02615	-1.2732	-1.45655	-1.15155	-1.15155	-1.6851	BRD-K21680192	mitoxantrone
CTSL	MCF7	1.73035e-13	0.000183783	1.48177e-05	1.48177e-05	0.000171595	-0.0333	1.5138	1.6333	1.075	1.075	2.0922	BRD-K86797399	SB-939
CTSL	HCC515	2.12722e-13	0.000139523	3.09458e-08	3.09458e-08	0.000327623	-0.1524	1.0548	1.1742	0.9192	0.9192	1.2976	BRD-K79090631	CGP-60474
CTSL	HA1E	3.24803e-13	0.00273048	2.74748e-07	2.74748e-07	0.00273048	0.0294	-5.3127	-5.2127	-4.5456	-4.5456	-5.8161	BRD-K76674262	homoharringtonine
CTSL	HT29	4.01195e-13	6.81511e-08	4.28302e-07	4.28302e-07	0.000255415	-0.0918	0.7827	1.82775	1.09825	1.09825	0.8317	BRD-K79090631	CGP-60474
CTSL	MCF7	1.03092e-12	0.000777403	9.9859e-05	9.9859e-05	0.00240919	-0.0333	0.82	1.07365	0.64215	0.64215	0.72455	BRD-K21680192	mitoxantrone
CTSL	HA1E	1.18337e-12	0.00273048	2.2088e-07	2.2088e-07	0.00273048	0.0294	-4.4866	-4.7933	-4.4866	-4.4866	-4.0894	BRD-A36057565	bruceantin
CTSL	MCF7	2.71962e-12	0.000605038	0.000471481	0.000471481	0.000264206	-0.0333	1.85785	3.6545	1.6542	1.6542	1.7285	BRD-K53417444	OTS-167
CTSL	HT29	9.65316e-12	0.00923413	1.72069e-06	1.72069e-06	0.00317671	-0.0918	2.36795	1.8438	2.2584	2.2584	2.8297	BRD-K61397605	romidepsin
CTSL	MCF7	2.2422e-11	0.00394816	1.07556e-05	1.07556e-05	0.00374937	-0.0333	2.07105	2.3264	1.5695	1.5695	2.2072	BRD-K69776681	volasertib
CTSL	HCC515	2.3978e-11	0.00787506	0.000231841	0.000231841	6.61604e-05	-0.1524	0.6389	0.3886	0.3886	0.3886	0.8561	BRD-K49865102	PD-0325901
CTSL	MCF7	3.27587e-11	0.00280144	1.00139e-06	1.00139e-06	0.101042	-0.0333	3.0279	3.9833	2.6604	2.6604	1.9474	BRD-K81258678	triptolide
CTSL	HT29	4.98334e-11	0.00294122	4.33568e-06	4.33568e-06	0.0139711	-0.0918	2.47155	3.3869	2.6002	2.6002	2.0759	BRD-K56957086	dacinostat
CTSL	MCF7	5.05564e-11	0.000562661	1.757e-06	1.05274e-07	0.0179687	-0.0333	1.9509	1.8892	2.1242	2.07565	1.7059	BRD-K68552125	phorbol-myristate-acetate
CTSL	MCF7	5.61649e-11	NA	NA	NA	NA	-0.0333	-0.2822	NA	NA	NA	NA	BRD-K50691590	bortezomib
CTSL	MCF7	7.2618e-11	0.00570017	9.45727e-06	9.45727e-06	0.00464239	-0.0333	2.0181	1.6216	1.8166	1.8166	1.8537	BRD-K56957086	dacinostat
CTSL	HT29	1.17405e-10	0.00127357	0.000633283	0.000633283	0.000667221	-0.0918	1.25365	1.83305	0.8337	0.8337	1.80905	BRD-K37687095	AZD-8330
CTSL	MCF7	1.71614e-10	0.00144402	2.6224e-06	2.6224e-06	0.057068	-0.0333	1.0192	1.14665	0.9833	0.9833	0.89715	BRD-K87909389	alvocidib
CTSL	MCF7	1.9371e-10	0.0182761	1.80599e-06	1.80599e-06	0.0169586	-0.0333	-2.1494	-2.0919	-2.14625	-2.14625	-2.6719	BRD-A36057565	bruceantin
CTSL	MCF7	2.85134e-10	0.000314077	0.000201845	0.000201845	0.00626313	-0.0333	1.36925	2.0097	1.0502	1.0502	1.4184	BRD-K43389698	BMS-387032
CTSL	HT29	3.2806e-10	0.0987575	0.0013519	0.0013519	0.00912196	-0.0918	1.0546	0.67945	0.67945	0.67945	0.97835	BRD-K08109215	I-BET-762
CTSL	MCF7	4.48791e-10	0.0274571	0.00195785	0.00195785	0.0247576	-0.0333	0.9463	0.58455	0.3234	0.3234	1.1404	BRD-K64890080	BI-2536
CTSL	HT29	5.78418e-10	0.00736084	0.00166572	0.00166572	0.0155064	-0.0918	1.1649	0.96395	0.4473	0.4473	1.66585	BRD-K64890080	BI-2536
CTSL	HA1E	5.84523e-10	0.00277487	7.87021e-07	7.87021e-07	0.00680576	0.0294	-2.4213	-3.1451	-2.4213	-2.4213	-1.5314	BRD-K99475619	genz-644282
CTSL	MCF7	5.90566e-10	0.00446233	4.08903e-06	4.08903e-06	0.0195665	-0.0333	-2.14245	-2.1138	-2.02645	-2.02645	-1.9691	BRD-K76674262	homoharringtonine
CTSL	A375	6.10623e-10	0.0614612	6.45789e-05	6.45789e-05	0.00853636	0.0424	-1.5442	-0.5342	-1.2916	-1.2916	-1.2884	BRD-K68164687	epothilone-b
CTSL	HT29	7.36436e-10	0.00660938	1.197e-05	1.197e-05	0.00535144	-0.0918	2.1722	2.4316	2.1875	2.1875	2.5385	BRD-K83837640	JNJ-26481585
CTSL	MCF7	1.00657e-09	0.000441453	0.000402781	0.000402781	0.00719477	-0.0333	1.4093	2.0811	1.0697	1.0697	1.9001	BRD-K92571446	WZ-3105
CTSL	PC3	2.23495e-09	0.0607962	0.00148076	0.00148076	0.000202307	-0.0109	1.0799	0.4577	0.592	0.592	1.2673	BRD-K77908580	entinostat
CTSL	A549	2.26966e-09	0.0213684	7.30562e-06	7.30562e-06	0.000427468	0.02615	1.02465	1.01615	1.02465	1.02465	1.6693	BRD-K86797399	SB-939
CTSL	HEPG2	2.29727e-09	0.00118204	0.000562938	0.000562938	0.0107012	-0.17825	1.0315	1.45645	0.8644	0.8644	1.2135	BRD-K21680192	mitoxantrone
CTSL	HA1E	4.4402e-09	0.0166099	1.06049e-05	1.06049e-05	0.00397152	0.0294	-2.1108	-2.12945	-1.884	-1.884	-2.9313	BRD-K76703230	YM-155
CTSL	HT29	4.95435e-09	0.0144023	7.38493e-06	7.38493e-06	0.108797	-0.0918	3.0113	5.16145	3.47785	3.47785	1.7764	BRD-K81258678	triptolide
CTSL	HCC515	5.2209e-09	0.120972	7.38981e-05	7.38981e-05	0.0206071	-0.1524	1.6278	0.8297	1.6062	1.6062	2.1561	BRD-K54606188	JQ1-(+)
CTSL	HT29	5.27025e-09	0.000398688	7.15462e-05	7.15462e-05	0.0112164	-0.0918	1.2696	1.5294	1.3796	1.3796	1.12195	BRD-K13662825	dinaciclib
CTSL	A375	5.94231e-09	0.0823193	0.000732507	0.000732507	0.00327454	0.0424	-1.71705	-1.2478	-1.2756	-1.2756	-2.2225	BRD-K67844266	pevonedistat
CTSL	HT29	9.26444e-09	0.025438	0.000495466	0.000495466	0.00541704	-0.0918	1.6684	2.8419	1.5201	1.5201	1.9118	BRD-K64538373	Ro-4987655
CTSL	A375	1.04027e-08	0.00387945	2.86645e-05	2.86645e-05	0.171637	0.0424	2.1118	2.1385	2.1118	2.1118	1.3137	BRD-K81258678	triptolide
CTSL	MCF7	1.23129e-08	0.00506473	7.98076e-07	7.98076e-07	0.0172152	-0.0333	2.37185	1.8613	2.6739	2.6739	2.5154	BRD-K61397605	romidepsin
CTSL	HA1E	1.27606e-08	0.0824892	0.00557656	0.00557656	0.000475218	0.0294	-0.6125	-0.5756	-0.427	-0.427	-1.1062	BRD-K02708799	GSK-1059615
CTSL	PC3	1.54637e-08	0.0135013	0.000333551	0.000333551	0.0290425	-0.0109	-1.3476	-1.3182	-1.2573	-1.2573	-1.5935	BRD-K78659596	ixazomib
CTSL	MCF7	1.86039e-08	0.0182776	5.19097e-06	5.19097e-06	0.0534287	-0.0333	1.6876	1.1032	2.5334	2.5334	0.7713	BRD-K29415052	BGT-226
CTSL	HT29	2.93072e-08	0.0489675	0.000496521	0.000496521	0.0192113	-0.0918	1.59965	1.2652	1.2652	1.2652	1.1732	BRD-K54606188	JQ1-(+)
CTSL	A375	3.75306e-08	0.273065	0.000825602	0.000825602	0.00888713	0.0424	-1.4046	-0.1936	-1.0069	-1.0069	-1.7296	BRD-K99252563	QL-XII-47
CTSL	A375	5.46531e-08	0.00407724	2.13307e-05	2.13307e-05	0.0156456	0.0424	-1.8467	-2.1766	-1.4969	-1.4969	-3.0421	BRD-K76674262	homoharringtonine
CTSL	HT29	6.29268e-08	0.0172227	0.00105455	0.00105455	0.0107448	-0.0918	1.60695	2.0844	1.2165	1.2165	1.4561	BRD-K69776681	volasertib
CTSL	HA1E	6.44254e-08	0.0769687	0.002521	0.002521	0.0163471	0.0294	1.2237	0.77425	0.98595	0.98595	1.2022	BRD-K64890080	BI-2536
CTSL	HT29	1.18541e-07	0.00486691	0.00276248	0.00276248	0.0276599	-0.0918	1.6921	2.3189	1.183	1.183	1.2337	BRD-K36363294	I-BET-151
CTSL	A375	1.73896e-07	0.00428415	0.00910057	0.00910057	0.00420547	0.0424	-1.6655	-2.0056	-1.1223	-1.1223	-2.1626	BRD-K34022604	clofarabine
CTSL	MCF7	2.07587e-07	0.252653	0.0192669	0.0192669	0.0901324	-0.0333	1.1639	0.52835	0.6397	0.6397	0.7432	BRD-K59317601	MLN-0128
CTSL	HA1E	2.08886e-07	0.0989226	0.0064625	0.0064625	0.00381326	0.0294	-1.6555	-1.6237	-1.291	-1.291	-1.8613	BRD-K46056750	AZD-7762
CTSL	A375	2.33755e-07	0.0210162	0.000720563	0.000720563	0.0522333	0.0424	-1.2453	-1.9577	-1.041	-1.041	-1.1138	BRD-K73088654	floxuridine
CTSL	MCF7	2.43587e-07	0.00298013	0.00245774	0.00245774	0.00372785	-0.0333	1.97495	3.4839	1.3641	1.3641	2.1596	BRD-K56844688	epirubicin
CTSL	HA1E	2.58479e-07	0.047945	0.00783209	0.00783209	0.00734878	0.0294	-1.3492	-0.84	-0.84	-0.84	-1.3427	BRD-K37890730	camptothecin
CTSL	PC3	2.60773e-07	0.0151541	0.00313244	0.00313244	0.083883	-0.0109	2.3186	3.1138	1.6416	1.6416	3.2238	BRD-K81258678	triptolide
CTSL	PC3	3.18856e-07	0.0311859	0.00529779	0.00529779	0.00131041	-0.0109	0.8882	0.7091	0.70795	0.70795	1.8632	BRD-K13662825	dinaciclib
CTSL	A375	3.92545e-07	0.00755714	1.93548e-06	1.93548e-06	0.59195	0.0424	-1.3807	-1.3807	-1.6832	-1.6832	-0.5786	BRD-K99475619	genz-644282
CTSL	HEPG2	4.21638e-07	0.386707	0.296512	0.296512	0.072967	-0.17825	0.749	0.2455	0.0656	0.0656	0.8177	BRD-A79768653	sirolimus
CTSL	HCC515	4.79301e-07	0.282828	0.62891	0.62891	0.024665	-0.1524	0.9041	0.2985	-0.0703	-0.0703	1.2487	BRD-K81418486	vorinostat
CTSL	PC3	5.41961e-07	0.00594815	0.00997297	0.00997297	0.00569893	-0.0109	1.38695	1.6245	0.7344	0.7344	1.7227	BRD-K56957086	dacinostat
CTSL	HT29	5.43834e-07	0.00533516	0.0169262	0.0169262	0.00630045	-0.0918	1.56765	1.8355	1.1718	1.1718	1.5393	BRD-K85751432	refametinib
CTSL	HCC515	6.33857e-07	0.00853406	0.0195581	0.0195581	0.00679168	-0.1524	1.4842	1.9102	0.7479	0.7479	1.9007	BRD-K92571446	WZ-3105
CTSL	PC3	7.04147e-07	0.11089	0.00282776	0.00282776	0.0469216	-0.0109	-1.49045	-1.9371	-1.0502	-1.0502	-1.6849	BRD-K99475619	genz-644282
CTSL	A375	8.61317e-07	0.101451	0.0634507	0.0634507	0.0349716	0.0424	-0.7959	-0.73815	-0.3651	-0.3651	-0.80615	BRD-A39996500	radicicol
CTSL	HCC515	9.93613e-07	0.23658	0.00251148	0.00251148	0.105994	-0.1524	1.3334	0.976	1.0935	1.0935	0.7705	BRD-K13662825	dinaciclib
CTSL	HA1E	1.5541e-06	0.445292	0.0717479	0.0717479	0.00294023	0.0294	-1.6989	-0.3647	-0.3647	-0.3647	-3.1221	BRD-K99252563	QL-XII-47
CTSL	HT29	1.57723e-06	0.00264553	0.000315865	0.000315865	0.135774	-0.0918	0.5194	0.905	0.6297	0.6297	0.2522	BRD-K49328571	dasatinib
CTSL	A375	1.78251e-06	0.0415282	0.000483864	0.000483864	0.0184801	0.0424	-1.785	-1.8773	-1.2869	-1.2869	-2.1072	BRD-K76703230	YM-155
CTSL	HT29	1.97542e-06	0.0149007	0.00032779	0.00032779	0.0571274	-0.0918	-1.5485	-1.5485	-1.5485	-1.5485	-1.6898	BRD-A36057565	bruceantin
CTSL	A375	2.50025e-06	0.146983	0.000344441	0.000344441	0.0135163	0.0424	-1.57325	-1.0675	-1.7163	-1.7163	-1.6992	BRD-K15108141	gemcitabine
CTSL	A549	3.05264e-06	0.0813001	0.0876415	0.0876415	0.00562853	0.02615	0.7081	0.52735	0.377	0.377	1.018	BRD-K16485616	mocetinostat
CTSL	HEPG2	3.32277e-06	0.0330273	0.00485984	0.00485984	0.00993755	-0.17825	0.8203	0.8698	0.6506	0.6506	0.9997	BRD-K12787259	CX-5461
CTSL	PC3	3.40644e-06	0.0123233	5.5791e-05	5.5791e-05	0.0144941	-0.0109	1.22385	1.3986	1.3986	1.3986	2.0228	BRD-K61397605	romidepsin
CTSL	HEPG2	3.61155e-06	0.0192099	0.0125633	0.0125633	0.00735899	-0.17825	1.16425	1.5208	0.3434	0.3434	1.5123	BRD-K54256913	MK-1775
CTSL	HCC515	3.73884e-06	0.009396	0.0605782	0.0605782	0.0166405	-0.1524	1.80715	2.5084	0.6005	0.6005	1.3846	BRD-K59317601	MLN-0128
CTSL	MCF7	4.24051e-06	0.0105909	0.038454	0.038454	0.051177	-0.0333	0.4775	0.83355	0.36335	0.36335	0.2668	BRD-K77908580	entinostat
CTSL	PC3	4.31821e-06	0.458312	0.000726413	0.000726413	0.241432	-0.0109	1.2204	0.6771	1.4224	1.4224	0.7971	BRD-K29415052	BGT-226
CTSL	HA1E	4.70563e-06	0.00676552	0.000446551	0.000446551	0.00621491	0.0294	-1.3765	-1.5228	-1.3144	-1.3144	-1.8845	BRD-K88573743	A-443654
CTSL	HEPG2	4.8238e-06	0.0755834	0.00138367	0.00138367	0.0215379	-0.17825	0.86745	0.607	0.6618	0.6618	0.9309	BRD-K68756823	FR-180204
CTSL	HEPG2	5.39952e-06	0.0206376	0.00534641	0.00534641	0.0130934	-0.17825	0.73935	1.297	0.5334	0.5334	1.1796	BRD-K16478699	PLX-4720
CTSL	HEPG2	6.71628e-06	0.0695942	0.000154865	0.000154865	0.0192099	-0.17825	1.1638	1.1068	1.1638	1.1638	2.0185	BRD-K37764012	PF-03758309
CTSL	HA1E	7.81237e-06	0.0271639	0.000374064	0.000374064	0.60294	0.0294	-0.99215	-1.5913	-1.5913	-1.5913	-0.3783	BRD-K54606188	JQ1-(+)
CTSL	PC3	8.27267e-06	0.00189877	0.093586	0.093586	0.00153473	-0.0109	1.2605	1.90635	0.62675	0.62675	1.3042	BRD-K53417444	OTS-167
CTSL	MCF7	8.70029e-06	0.00638918	0.00016811	0.00016811	0.0460115	-0.0333	0.9294	1.5083	1.4139	1.4139	1.9141	BRD-K15179879	carfilzomib
CTSL	A375	9.80067e-06	0.054286	0.00224134	0.00224134	0.0142749	0.0424	-0.8242	-0.7988	-0.7988	-0.7988	-1.467	BRD-K90382497	GW-843682X
CTSL	MCF7	9.92267e-06	0.0200927	0.00048714	0.00048714	0.106551	-0.0333	0.9552	2.1414	1.2951	1.2951	0.9552	BRD-K06858286	cabazitaxel
CTSL	HCC515	1.09985e-05	0.199769	0.0087857	0.0087857	0.0101727	-0.1524	0.98275	0.2703	0.3876	0.3876	1.3911	BRD-K29415052	BGT-226
CTSL	HA1E	1.16059e-05	0.0136614	0.00214235	0.00214235	0.0262534	0.0294	-1.0676	-1.0676	-0.8815	-0.8815	-1.8221	BRD-A94756469	digoxin
CTSL	A375	1.30702e-05	0.0276511	0.000490805	0.000490805	0.279767	0.0424	1.4479	1.90405	1.4518	1.4518	1.7587	BRD-K41783120	STA-5326
CTSL	MCF7	1.38724e-05	0.251177	0.0194801	0.0194801	0.12036	-0.0333	0.4824	0.4936	0.43805	0.43805	0.32575	BRD-K68065987	MK-2206
CTSL	A375	1.47065e-05	0.214222	0.00114603	0.00114603	0.0326624	0.0424	-0.8412	-0.8245	-0.8313	-0.8313	-1.2149	BRD-K23363278	CYT-997
CTSL	A549	1.53923e-05	0.00044472	0.000141596	0.000141596	0.0201992	0.02615	0.3236	0.6971	0.4049	0.4049	0.27225	BRD-K49328571	dasatinib
CTSL	A375	1.54828e-05	0.0162072	0.000169632	0.000169632	0.0990079	0.0424	-1.2217	-1.6375	-1.1864	-1.1864	-1.4325	BRD-K68532323	SB-743921
CTSL	MCF7	1.55251e-05	0.105576	0.017184	0.017184	0.279411	-0.0333	1.50905	1.9853	0.8585	0.8585	2.2496	BRD-K83837640	JNJ-26481585
CTSL	HEPG2	1.57199e-05	0.0755834	0.0978802	0.0978802	0.0102511	-0.17825	1.23405	1.1794	1.1794	1.1794	1.2381	BRD-K70642949	GSK-2334470
CTSL	HT29	1.6684e-05	0.502014	0.060356	0.060356	0.0145789	-0.0918	0.50665	0.234	0.30575	0.30575	0.58555	BRD-K59317601	MLN-0128
CTSL	A375	1.73073e-05	0.275457	0.0711928	0.0711928	0.0158672	0.0424	0.8597	0.3432	0.6541	0.6541	1.16895	BRD-K86797399	SB-939
CTSL	PC3	1.74902e-05	0.0758792	0.000963244	0.000963244	0.52238	-0.0109	-1.04465	-0.7718	-0.9009	-0.9009	-0.8476	BRD-K18157228	fdcyd
CTSL	HT29	1.76255e-05	0.0593617	0.00297989	0.00297989	0.0182094	-0.0918	0.5034	0.5481	0.63915	0.63915	1.1498	BRD-K37764012	PF-03758309
CTSL	HEPG2	1.96483e-05	0.09828	0.058446	0.058446	0.0343769	-0.17825	0.7345	0.7016	0.4383	0.4383	0.6722	BRD-K05870596	XMD-1499
CTSL	A549	1.98362e-05	0.0956958	0.0383558	0.0383558	0.125569	0.02615	1.14095	1.0349	0.8025	0.8025	0.3917	BRD-K42918627	GSK-2126458
CTSL	HA1E	2.43369e-05	0.135307	6.56155e-05	6.56155e-05	0.742455	0.0294	-0.6087	-0.73075	-0.9193	-0.9193	-0.20195	BRD-K03449891	foretinib
CTSL	HEPG2	2.45007e-05	0.0908588	0.156162	0.156162	0.00576612	-0.17825	1.0949	0.516	0.1303	0.1303	1.4862	BRD-K36363294	I-BET-151
CTSL	MCF7	2.45177e-05	0.133811	0.00238815	0.00238815	0.441097	-0.0333	0.29725	0.13115	0.31375	0.31375	0.14565	BRD-K64800655	PHA-793887
CTSL	HA1E	2.50619e-05	0.0238278	0.00016722	0.000259093	0.427885	0.0294	0.917	0.86405	1.2863	1.01895	0.6163	BRD-K68552125	phorbol-myristate-acetate
CTSL	HEPG2	2.55612e-05	0.00522134	0.128581	0.128581	0.0056719	-0.17825	1.3815	1.5401	0.6301	0.6301	1.4797	BRD-K42436189	AZ-20
CTSL	A375	2.59599e-05	0.0166246	0.00645396	0.00645396	0.0710749	0.0424	-1.0315	-1.3022	-0.9773	-0.9773	-1.2926	BRD-K74057757	indibulin
CTSL	MCF7	2.6393e-05	0.0259249	0.168091	0.168091	0.00420409	-0.0333	1.18225	1.7844	0.4006	0.4006	2.4644	BRD-K62627508	idasanutlin
CTSL	HCC515	2.72106e-05	0.0051096	0.0692265	0.0692265	0.00349367	-0.1524	1.6724	1.5128	0.334	0.334	2.2564	BRD-U07805514	saracatinib
CTSL	HT29	2.86545e-05	0.455648	0.307375	0.307375	0.00940484	-0.0918	0.6492	0.3049	0.254	0.254	1.54285	BRD-K17743125	belinostat
CTSL	HEPG2	2.9628e-05	0.101605	0.00129759	0.00129759	0.0343769	-0.17825	0.814	1.3677	1.3677	1.3677	0.7291	BRD-U22633929	XMD11-85H
CTSL	HEPG2	3.01934e-05	0.211293	0.0288971	0.0288971	0.156574	-0.17825	0.73835	0.5094	0.5094	0.5094	1.1849	BRD-K36740062	GSK-1070916
CTSL	HEPG2	3.32597e-05	0.255491	0.00727987	0.00727987	0.0128972	-0.17825	1.1712	1.206	1.1712	1.1712	0.9918	BRD-K12184916	NVP-BEZ235
CTSL	PC3	3.55043e-05	0.0720015	0.0360594	0.0360594	0.0435873	-0.0109	0.7014	0.61745	0.5274	0.5274	0.8778	BRD-K59317601	MLN-0128
CTSL	A375	4.04581e-05	0.10267	0.0031027	0.0031027	0.190811	0.0424	-0.79555	-0.8209	-0.8209	-0.8209	-0.3549	BRD-K65182930	NVP-AUY922
CTSL	A375	4.15422e-05	0.153934	0.00979131	0.00979131	0.0407422	0.0424	-0.7022	-0.7022	-0.5178	-0.5178	-1.2556	BRD-K82135108	elesclomol
CTSL	MCF7	4.26985e-05	0.867878	0.215329	0.215329	0.0159695	-0.0333	0.3402	0.03665	0.17695	0.17695	0.6811	BRD-K02708799	GSK-1059615
CTSL	A375	4.29708e-05	0.234584	0.00611455	0.00611455	0.0116917	0.0424	0.93325	0.656	0.9015	0.9015	1.6037	BRD-K32107296	temozolomide
CTSL	PC3	4.33935e-05	0.829072	0.0293606	0.0293606	0.148942	-0.0109	-1.0255	0.4789	-1.4665	-1.4665	-0.8346	BRD-K73088654	floxuridine
CTSL	MCF7	4.76318e-05	0.00286833	0.000367821	0.000367821	0.0563932	-0.0333	0.9131	3.4526	0.9832	0.9832	1.6901	BRD-A68009927	daunorubicin
CTSL	HT29	5.05679e-05	0.461329	0.148233	0.148233	0.00871529	-0.0918	0.71735	0.2316	0.4347	0.4347	2.3788	BRD-K92571446	WZ-3105
CTSL	MCF7	5.27989e-05	0.266003	0.09865	0.09865	0.00531079	-0.0333	1.45465	1.5089	1.2578	1.2578	1.8065	BRD-K37890730	camptothecin
CTSL	HT29	5.3244e-05	0.0467961	0.236865	0.236865	0.139474	-0.0918	1.0061	0.87205	0.4109	0.4109	0.65825	BRD-K05104363	PD-184352
CTSL	A549	5.40728e-05	0.861536	0.0366693	0.0366693	0.044233	0.02615	0.4004	-0.11535	0.1785	0.1785	0.3585	BRD-K02113016	olaparib
CTSL	HEPG2	5.50254e-05	0.0617193	0.00166573	0.00166573	0.288307	-0.17825	-1.12065	-1.1817	-1.1817	-1.1817	-1.1089	BRD-K65182930	NVP-AUY922
CTSL	PC3	5.59494e-05	0.0126756	0.00155356	0.00155356	0.0137868	-0.0109	0.9578	1.3134	1.1019	1.1019	2.0737	BRD-K93779381	ingenol-mebutate
CTSL	A375	5.77034e-05	0.0785368	0.0114614	0.0114614	0.00815068	0.0424	1.3259	1.1249	1.1249	1.1249	1.5021	BRD-K61397605	romidepsin
CTSL	HT29	7.10501e-05	0.310426	0.308903	0.308903	0.00357357	-0.0918	1.1942	0.3141	0.3141	0.3141	2.2893	BRD-K12343256	trametinib
CTSL	HA1E	7.28357e-05	0.269236	0.00552054	0.00552054	0.0166569	0.0294	1.0663	0.7576	1.1022	1.1022	2.0267	BRD-K47869605	podophyllotoxin
CTSL	A549	7.3914e-05	0.0882756	0.13929	0.0261142	0.0430167	0.02615	0.59165	0.6345	0.3805	0.46805	0.8339	BRD-A79768653	sirolimus
CTSL	HCC515	7.53178e-05	0.077663	0.000445598	0.000445598	0.860808	-0.1524	1.13785	0.4798	1.1974	1.1974	0.0921	BRD-K67578145	GDC-0879
CTSL	A375	7.97952e-05	0.0511147	0.00285101	0.00285101	0.0673253	0.0424	-0.71585	-0.8826	-0.7194	-0.7194	-0.6007	BRD-K24576554	AT-9283
CTSL	HA1E	8.40328e-05	0.0229591	0.013695	0.013695	0.1417	0.0294	1.0253	1.2178	0.9173	0.9173	1.5991	BRD-K93779381	ingenol-mebutate
CTSL	HA1E	9.03358e-05	0.00842981	0.000852052	0.000852052	0.138396	0.0294	0.9456	1.4647	1.2721	1.2721	0.7606	BRD-K41783120	STA-5326
CTSL	A375	9.17596e-05	0.1507	0.0315097	0.0315097	0.0756772	0.0424	-0.5362	-0.41115	-0.41115	-0.41115	-0.68155	BRD-K93123848	RAF-265
CTSL	MCF7	9.83648e-05	0.00915461	0.000543416	0.000543416	0.376167	-0.0333	0.9573	1.4604	1.4539	1.4539	0.4954	BRD-K59325863	delanzomib
CTSL	MCF7	9.91872e-05	0.0118387	0.0149768	0.0149768	0.308443	-0.0333	0.96285	1.4495	0.8728	0.8728	0.4764	BRD-K67844266	pevonedistat
CTSL	HEPG2	0.000103832	0.0102511	0.0568248	0.0568248	0.062472	-0.17825	0.72155	1.114	0.2838	0.2838	0.8638	BRD-K03063480	PF-477736
CTSL	HT29	0.000114055	0.0631403	0.00251301	0.00251301	0.0423424	-0.0918	0.6862	1.048	0.727	0.727	1.5303	BRD-K04956647	nebivolol
CTSL	HA1E	0.000117864	0.0402971	0.00462983	0.00462983	0.84934	0.0294	0.72385	0.9432	0.6823	0.6823	0.3761	BRD-K69776681	volasertib
CTSL	HT29	0.000124101	0.76576	0.209802	0.209802	0.015713	-0.0918	1.1539	-0.1885	0.7862	0.7862	1.665	BRD-A72711497	lasalocid
CTSL	MCF7	0.000125137	0.292153	0.0298679	0.0298679	0.446768	-0.0333	1.01095	0.6927	0.7408	0.7408	0.0289	BRD-K37764012	PF-03758309
CTSL	HA1E	0.000126738	0.288009	0.00109704	0.00109704	0.379168	0.0294	-1.1766	-2.0932	-1.4957	-1.4957	-0.6382	BRD-K60997853	PHA-848125
CTSL	HT29	0.000130803	0.0611253	0.0645385	0.0645385	0.118315	-0.0918	0.6892	0.8229	0.51655	0.51655	0.39385	BRD-K57080016	selumetinib
CTSL	HT29	0.000134504	0.902871	0.0438264	0.0438264	0.104796	-0.0918	0.77015	0.1376	0.5864	0.5864	0.9463	BRD-K24576554	AT-9283
CTSL	A375	0.000136142	0.369399	0.0641329	0.0641329	0.00566977	0.0424	1.29995	0.978	0.978	0.978	2.2155	BRD-K56957086	dacinostat
CTSL	PC3	0.000136637	0.0835733	0.00336207	0.00336207	0.0841937	-0.0109	-3.7784	-4.5965	-3.7784	-3.7784	-3.8653	BRD-A36057565	bruceantin
CTSL	A375	0.000140672	0.098832	0.000639058	0.000639058	0.0917568	0.0424	-2.6442	-1.9001	-2.9503	-2.9503	-2.0775	BRD-A36057565	bruceantin
CTSL	HA1E	0.000146415	0.764684	0.00234422	0.00234422	NA	0.0294	-1.67895	0.2321	-1.4472	-1.4472	NA	BRD-K53417444	OTS-167
CTSL	HT29	0.000147672	0.223267	0.195572	0.195572	0.0576018	-0.0918	0.88675	0.5031	0.5031	0.5031	0.7495	BRD-K42918627	GSK-2126458
CTSL	A375	0.000153228	0.0248325	0.00267214	0.00267214	0.458806	0.0424	0.99265	1.3999	0.9716	0.9716	1.2703	BRD-K70592483	phenylacetylglutamine
CTSL	A375	0.000157458	0.0201329	0.0673239	0.0673239	0.00352082	0.0424	-0.8814	-0.9769	-0.7859	-0.7859	-2.4523	BRD-A27376179	lestaurtinib
CTSL	HCC515	0.000158432	0.0473014	0.0762126	0.0762126	0.195952	-0.1524	0.73365	0.721	0.59895	0.59895	0.3195	BRD-K92428232	GSK-461364
CTSL	A375	0.000158469	0.151404	0.00852425	0.00852425	0.0115621	0.0424	-1.13795	-0.7376	-1.1837	-1.1837	-1.2319	BRD-K68392338	ZK-93426
CTSL	A375	0.000159613	0.366272	0.115124	0.115124	0.198567	0.0424	-0.8026	-0.3922	-0.3922	-0.3922	-0.7805	BRD-K55026842	azacitidine
CTSL	A375	0.000162629	0.114419	0.545556	0.545556	0.0359058	0.0424	-0.7549	-0.7214	-0.39805	-0.39805	-2.3323	BRD-K75649340	tioguanine
CTSL	HT29	0.000164016	0.17867	0.0262664	0.0262664	0.218793	-0.0918	0.907	0.4375	0.8966	0.8966	0.1686	BRD-K28965160	BVD-523
CTSL	HA1E	0.000164392	0.0512582	0.104142	0.104142	0.00470919	0.0294	-1.1653	-1.019	-0.3088	-0.3088	-1.8408	BRD-K88510285	bortezomib
CTSL	HT29	0.000167052	0.287001	0.342737	0.342737	0.0114984	-0.0918	1.1757	0.2211	0.2211	0.2211	1.8276	BRD-K89014967	AS-703026
CTSL	HCC515	0.000167428	0.105994	0.000513075	0.000513075	0.395699	-0.1524	0.61855	1.3902	1.1493	1.1493	0.4442	BRD-K93123848	RAF-265
CTSL	HT29	0.000167753	0.104373	0.0280683	0.0280683	0.0296004	-0.0918	0.6083	0.5481	0.5481	0.5481	1.1616	BRD-K86856088	UNC-0638
CTSL	MCF7	0.000175307	0.183427	0.790376	0.790376	0.00349151	-0.0333	0.4549	0.3069	-0.1224	-0.1224	0.99675	BRD-K13390322	AT-7519
CTSL	HA1E	0.000176187	0.116328	0.0258061	0.0258061	0.203134	0.0294	-0.9084	-0.5447	-0.7533	-0.7533	-0.70075	BRD-K51967704	BIIB-021
CTSL	HCC515	0.000177996	0.00014588	0.00230153	0.00230153	0.0189605	-0.1524	0.2512	1.1044	0.2989	0.2989	0.5107	BRD-K49328571	dasatinib
CTSL	PC3	0.000183552	0.40339	0.133953	0.133953	0.0278139	-0.0109	1.2234	1.1661	0.7914	0.7914	1.7484	BRD-K70642949	GSK-2334470
CTSL	A375	0.00018419	0.0812875	8.11739e-05	8.11739e-05	0.27543	0.0424	-1.2099	-0.7775	-1.4093	-1.4093	-1.3061	BRD-K25433859	maprotiline
CTSL	A375	0.000185528	0.050131	0.0860668	0.0860668	0.0234185	0.0424	1.0484	1.0392	0.7083	0.7083	1.0654	BRD-K00337317	NU-7441
CTSL	HT29	0.000189473	0.173149	0.0266731	0.0266731	0.328678	-0.0918	1.1616	1.0686	1.0686	1.0686	0.9781	BRD-K60997853	PHA-848125
CTSL	MCF7	0.000192203	0.0146045	0.105968	0.105968	0.0225745	-0.0333	1.0019	1.5766	0.5799	0.5799	1.843	BRD-K21361524	selinexor
CTSL	A375	0.00019256	0.00420042	0.00114336	0.00019256	0.0612575	0.0424	-0.75415	-1.14655	-0.6425	-0.75415	-1.0005	BRD-A68281735	REV-5901
CTSL	HT29	0.000196202	0.718903	0.133465	0.133465	0.0126938	-0.0918	0.4726	-0.29125	0.2571	0.2571	0.76275	BRD-K09951645	dabrafenib
CTSL	PC3	0.000197155	0.0753855	0.00444938	0.00444938	0.76699	-0.0109	0.8397	0.8011	0.8011	0.8011	0.1507	BRD-K95260951	asenapine
CTSL	A375	0.000199056	0.0103345	0.00913066	0.00913066	0.0844148	0.0424	-1.15575	-1.2935	-1.2935	-1.2935	-0.9996	BRD-K89561498	SN-38
CTSL	A375	0.000200633	0.0164918	0.0324976	0.0324976	0.0872757	0.0424	-0.95705	-1.188	-0.9443	-0.9443	-0.6602	BRD-K78567475	dolastatin-10
CTSL	HEPG2	0.000211408	0.352308	0.00502538	0.00502538	0.107346	-0.17825	0.508	-0.1309	0.5811	0.5811	0.7386	BRD-K53414658	tivozanib
CTSL	HCC515	0.000216151	0.00565462	0.00306364	0.00306364	0.14801	-0.1524	1.1856	1.5844	1.0766	1.0766	-0.7949	BRD-A90451247	KU-60019
CTSL	MCF7	0.000220119	0.1009	0.0216083	0.0216083	0.00825621	-0.0333	-0.76095	-0.5446	-0.6719	-0.6719	-1.6749	BRD-A45540146	KI-20227
CTSL	A375	0.000220909	0.45053	0.0350055	0.0350055	0.0812875	0.0424	1.0635	0.1179	0.9744	0.9744	1.0307	BRD-K23672206	BCI-540
CTSL	A549	0.00023926	0.715112	0.0185515	0.0185515	0.00284817	0.02615	0.346	0.0802	0.3584	0.3584	0.554	BRD-K49865102	PD-0325901
CTSL	HCC515	0.000241043	0.70944	0.0410644	0.0410644	0.0126602	-0.1524	0.56325	-0.063	0.2861	0.2861	1.3781	BRD-K00337317	NU-7441
CTSL	HA1E	0.000242958	0.217659	0.0113008	0.0113008	0.0850786	0.0294	1.09465	0.2184	0.9549	0.9549	1.2344	BRD-K36732695	setiptiline
CTSL	A375	0.000244268	0.113076	0.00685671	0.00685671	0.389589	0.0424	0.895	1.5422	1.3778	1.3778	0.5122	BRD-K59332007	linopirdine
CTSL	PC3	0.000246835	0.272007	0.00875642	0.00875642	0.0228688	-0.0109	1.0022	0.1955	0.8463	0.8463	1.7543	BRD-K60585088	paricalcitol
CTSL	A549	0.000247904	0.362875	0.00260682	0.00260682	0.0234025	0.02615	1.065	0.4996	1.2111	1.2111	1.1894	BRD-A45498368	WYE-125132
CTSL	PC3	0.000255692	0.712265	0.00935883	0.00935883	0.00616954	-0.0109	0.9481	0.1622	0.8619	0.8619	1.7623	BRD-K74305673	IKK-2-inhibitor-V
CTSL	HA1E	0.000258028	0.17768	0.00246139	0.00246139	0.0347956	0.0294	-0.7759	-0.8077	-0.968	-0.968	-0.7837	BRD-K93747373	HG-5-113-01
CTSL	A375	0.000259547	0.133171	0.118085	0.118085	0.230749	0.0424	-1.11035	-1.1082	-0.645	-0.645	-1.3863	BRD-K23499943	alvespimycin
CTSL	A375	0.000267726	0.0515245	0.00322715	0.00322715	0.0252772	0.0424	-0.62555	-1.1603	-0.7089	-0.7089	-1.3153	BRD-A12994259	pomalidomide
CTSL	A375	0.000276787	0.0240244	0.00762737	0.00762737	0.0457122	0.0424	-0.86765	-1.1167	-1.1167	-1.1167	-0.6728	BRD-A55579717	cytisine
CTSL	HA1E	0.000282312	0.354096	0.012457	0.012457	0.0647544	0.0294	-0.8603	-0.5948	-0.8603	-0.8603	-0.7078	BRD-A44448661	pentobarbital
CTSL	HT29	0.000282958	0.310898	0.15016	0.15016	0.02787	-0.0918	0.9358	0.2826	0.2826	0.2826	0.9877	BRD-K52233191	R-547
CTSL	HT29	0.000284567	0.335575	0.00492139	0.00492139	0.309014	-0.0918	1.0781	0.2349	1.3816	1.3816	0.7746	BRD-A51964809	halofantrine
CTSL	HA1E	0.000291033	0.238696	0.169827	0.169827	0.117333	0.0294	0.5701	0.5638	0.37875	0.37875	0.80075	BRD-K79090631	CGP-60474
CTSL	A375	0.000292533	0.607277	0.176533	0.176533	0.012953	0.0424	1.3089	0.3184	0.47295	0.47295	1.3746	BRD-K39252998	atipamezole
CTSL	HT29	0.000294929	0.0134049	0.0175392	0.0175392	0.614295	-0.0918	0.7858	1.4229	0.4654	0.4654	-0.2743	BRD-K92093830	doxorubicin
CTSL	PC3	0.000302921	0.589038	0.00512786	0.00512786	0.039497	-0.0109	-1.05805	-0.3452	-1.1605	-1.1605	-1.0187	BRD-K78118466	LY-2157299
CTSL	HCC515	0.000311177	0.00910042	0.00954087	0.00954087	0.0404283	-0.1524	0.7914	1.3976	1.3805	1.3805	0.7429	BRD-K67868012	PI-103
CTSL	HT29	0.000317102	0.387763	0.791731	0.791731	0.056773	-0.0918	0.3667	0.27285	-0.00815	-0.00815	0.95855	BRD-K77908580	entinostat
CTSL	HA1E	0.000337211	0.0684029	0.0014521	0.0014521	0.849726	0.0294	0.92585	0.6556	1.1961	1.1961	-0.0673	BRD-K17075857	chloroxine
CTSL	HEPG2	0.000346232	0.169542	0.00115248	0.00115248	0.0532579	-0.17825	0.69035	1.1534	1.1534	1.1534	0.6325	BRD-K67578145	GDC-0879
CTSL	HCC515	0.00034715	0.0257361	0.0804812	0.0804812	0.124963	-0.1524	0.86535	1.566	0.6473	0.6473	0.47	BRD-K36363294	I-BET-151
CTSL	PC3	0.000377889	0.836871	0.354171	0.354171	0.0119796	-0.0109	0.84555	0.0622	0.1956	0.1956	1.6177	BRD-K11196887	norfloxacin
CTSL	A375	0.000385793	0.0626266	0.0775938	0.0775938	0.060448	0.0424	0.81025	0.8343	0.6003	0.6003	0.8025	BRD-K90777969	cutamesine
CTSL	HT29	0.000402907	0.284029	0.00619695	0.00619695	0.0522332	-0.0918	0.7841	0.49585	0.77325	0.77325	1.5892	BRD-A28746609	paclitaxel
CTSL	HT29	0.000406368	0.0068296	0.00553773	0.00553773	0.0201991	-0.0918	0.89605	1.6948	1.2092	1.2092	1.3089	BRD-K90777969	cutamesine
CTSL	MCF7	0.000407959	0.71417	0.228143	0.228143	0.0430262	-0.0333	0.70795	0.0803	0.3335	0.3335	1.1363	BRD-K14529030	meisoindigo
CTSL	PC3	0.000414826	0.190756	0.00223329	0.00223329	0.179813	-0.0109	-0.7349	-0.8405	-0.8115	-0.8115	-0.64	BRD-K60219430	serdemetan
CTSL	HT29	0.000431161	0.332608	0.0191381	0.0191381	0.276837	-0.0918	0.8959	0.7443	0.98275	0.98275	0.7594	BRD-K20001883	apabetalone
CTSL	HA1E	0.000435076	0.0569054	0.00792492	0.00792492	0.0199512	0.0294	0.85835	0.8184	0.8184	0.8184	1.1034	BRD-K94176593	TWS-119
CTSL	HA1E	0.000435732	0.124798	0.00992687	0.00992687	0.190682	0.0294	-0.5813	-0.5444	-0.5393	-0.5393	-0.6182	BRD-K21908111	AZD-1208
CTSL	MCF7	0.000447003	0.197981	0.00351734	0.00351734	0.875269	-0.0333	0.92675	0.3391	1.1627	1.1627	0.0772	BRD-K09471561	levofloxacin
CTSL	HA1E	0.000447714	0.16237	0.0035136	0.0035136	0.0260218	0.0294	-0.7451	-0.3582	-0.9971	-0.9971	-1.1062	BRD-K23248433	camicinal
CTSL	HCC515	0.000452944	0.300374	0.729954	0.729954	0.0156716	-0.1524	0.92005	0.6815	-0.0194	-0.0194	1.8161	BRD-A60245366	AS-601245
CTSL	MCF7	0.000470067	0.0782487	0.0093604	0.0093604	0.291824	-0.0333	0.62605	0.7588	0.5538	0.5538	0.326	BRD-K28822270	resminostat
CTSL	A549	0.000470367	0.345557	0.0501621	0.0501621	0.0706088	0.02615	0.4876	0.1673	0.2245	0.2245	0.5463	BRD-A92800748	tie2-kinase-inhibitor
CTSL	HA1E	0.000488849	0.0415605	0.190831	0.190831	0.127726	0.0294	-0.8543	-0.9612	-0.26555	-0.26555	-0.4501	BRD-K23499943	alvespimycin
CTSL	A375	0.00048913	0.035219	0.00527283	0.00527283	0.00548511	0.0424	0.8048	1.0773	1.042	1.042	2.4328	BRD-K69726342	atorvastatin
CTSL	PC3	0.000492672	0.198677	0.149662	0.149662	0.0323089	-0.0109	0.55715	0.3748	0.3449	0.3449	0.61435	BRD-K60866521	idelalisib
CTSL	HA1E	0.000493222	0.483128	0.099046	0.099046	0.0358675	0.0294	0.84765	0.2268	0.7565	0.7565	1.3628	BRD-K78567475	dolastatin-10
CTSL	HA1E	0.000493644	0.0736572	0.0222762	0.0222762	0.26497	0.0294	-0.95205	-1.05	-0.95205	-0.95205	-0.5922	BRD-K71281111	SNX-2112
CTSL	PC3	0.000508194	0.590762	0.0105526	0.0105526	0.710775	-0.0109	-0.92595	-0.295	-1.072	-1.072	-0.6976	BRD-K69932463	AZD-8055
CTSL	MCF7	0.000509359	0.118602	0.0480372	0.0480372	0.124905	-0.0333	0.6682	0.6044	0.6044	0.6044	0.3222	BRD-K76401790	JNK-IN-5A
CTSL	HT29	0.000518131	0.050695	0.0142247	0.0142247	0.0135539	-0.0918	0.62165	1.0207	1.0207	1.0207	1.7005	BRD-K97643133	amiprilose
CTSL	A375	0.00052398	0.0255991	0.0102327	0.0102327	0.076937	0.0424	0.6892	1.3434	1.0042	1.0042	1.3724	BRD-K78692225	leflunomide
CTSL	A375	0.000525699	0.179758	0.660701	0.660701	0.00448673	0.0424	-1.0616	-0.2179	-0.2179	-0.2179	-1.904	BRD-K93034159	cladribine
CTSL	A375	0.00053871	0.0128111	0.0868444	0.0868444	0.0173952	0.0424	1.10385	1.488	1.1136	1.1136	1.0941	BRD-K48488978	YM-201636
CTSL	HT29	0.000546356	0.0964025	0.513864	0.513864	0.103532	-0.0918	1.3662	1.5446	0.2515	0.2515	0.8493	BRD-K13094524	PFI-1
CTSL	PC3	0.00055541	0.620057	0.0184976	0.0769947	0.26982	-0.0109	0.5226	0.1392	0.6745	0.4004	0.23825	BRD-K54606188	JQ1-(+)
CTSL	A375	0.000557222	0.0304392	0.00032999	0.00032999	0.0142574	0.0424	0.3519	0.34775	0.37705	0.37705	0.53905	BRD-K49328571	dasatinib
CTSL	HT29	0.000567507	0.0763557	0.134894	0.134894	0.103952	-0.0918	0.78885	0.5246	0.3713	0.3713	0.758	BRD-K63675182	triflupromazine
CTSL	MCF7	0.000575182	0.443199	0.046215	0.046215	0.0196306	-0.0333	0.7948	-0.6052	0.703	0.703	1.0586	BRD-K78055238	LY-2090314
CTSL	HCC515	0.00058824	0.149551	0.105396	0.105396	0.0243167	-0.1524	0.7429	1.1787	0.751	0.751	0.7585	BRD-K42918627	GSK-2126458
CTSL	HEPG2	0.000614356	0.155008	0.0298127	0.0298127	0.476232	-0.17825	0.6113	0.9799	0.3903	0.3903	0.6463	BRD-K04833372	GSK-1904529A
CTSL	PC3	0.000614478	0.570907	0.561757	0.561757	0.00768354	-0.0109	0.9874	0.5369	0.5369	0.5369	1.4242	BRD-K14529030	meisoindigo
CTSL	HA1E	0.000615799	0.26038	0.347979	0.347979	0.236976	0.0294	-0.8671	-0.3611	-0.0628	-0.0628	-0.6991	BRD-K07310275	PF-04691502
CTSL	HEPG2	0.000624162	0.0423973	0.0689984	0.0689984	0.0663505	-0.17825	0.79455	1.005	0.1137	0.1137	1.125	BRD-U61997977	WZ-4-145
CTSL	MCF7	0.000625752	0.128947	0.051177	0.051177	0.130444	-0.0333	0.6332	1.5274	0.5275	0.5275	0.81005	BRD-K61195623	combretastatin-A-4
CTSL	HA1E	0.00066975	0.935425	0.321951	0.321951	0.0274087	0.0294	-0.40565	0.0367	-0.1455	-0.1455	-0.65515	BRD-K54256913	MK-1775
CTSL	HCC515	0.000702142	0.993442	0.387293	0.387293	0.00881318	-0.1524	0.73685	0.0102	0.1309	0.1309	1.1498	BRD-K22096725	ALW-II-49-7
CTSL	HT29	0.000708166	0.0370262	0.00993729	0.00993729	0.558893	-0.0918	0.8178	0.9571	0.9571	0.9571	0.1962	BRD-K23204545	busulfan
CTSL	A375	0.000725864	0.678506	0.112286	0.112286	0.296667	0.0424	0.9722	-0.1784	0.4793	0.4793	1.0563	BRD-K80396088	gliquidone
CTSL	A375	0.000738598	0.0600465	0.00238698	0.00238698	0.0483223	0.0424	-0.65995	-0.5206	-1.0731	-1.0731	-0.6928	BRD-K17894950	indirubin
CTSL	A375	0.000743426	0.165422	0.0211886	0.0211886	0.659242	0.0424	-0.63185	-0.5086	-1.1882	-1.1882	0.1541	BRD-K29735307	ostarine
CTSL	HT29	0.000773538	0.926326	0.897225	0.897225	0.70207	-0.0918	0.3805	-0.11625	0.09145	0.09145	0.0398	BRD-K21680192	mitoxantrone
CTSL	MCF7	0.000777169	0.0500653	0.00986864	0.00986864	0.378117	-0.0333	0.5894	1.2022	0.5322	0.5322	0.8469	BRD-K52560704	methylstat
CTSL	HEPG2	0.000783729	0.0296479	0.156162	0.156162	0.313416	-0.17825	0.6037	0.9081	0.4161	0.4161	0.6616	BRD-K66538826	amuvatinib
CTSL	HEPG2	0.000789854	0.127455	0.0260865	0.0260865	0.757212	-0.17825	0.64065	0.6171	0.6171	0.6171	0.0278	BRD-K59317601	MLN-0128
CTSL	HEPG2	0.000808496	0.538158	0.24254	0.24254	0.115811	-0.17825	0.5609	-0.0634	-0.0634	-0.0634	0.8999	BRD-K83972459	JWE-035
CTSL	HEPG2	0.000809866	0.0251377	0.0137249	0.0137249	0.415343	-0.17825	0.6457	0.8759	0.83275	0.83275	0.2643	BRD-A45498368	WYE-125132
CTSL	MCF7	0.000818681	0.0268423	0.172222	0.172222	0.361271	-0.0333	0.67625	1.3929	0.5536	0.5536	0.635	BRD-K73237276	tacalcitol
CTSL	PC3	0.000819754	0.290064	0.00940164	0.00940164	0.224482	-0.0109	0.35215	0.0585	0.44475	0.44475	0.4145	BRD-K49865102	PD-0325901
CTSL	PC3	0.000824644	0.689304	0.0439078	0.0439078	0.0875056	-0.0109	-0.7709	-0.1927	-0.5553	-0.5553	-1.0157	BRD-K79602928	metformin
CTSL	HT29	0.000830009	0.0421419	0.0304096	0.0304096	0.713917	-0.0918	0.7305	1.3926	0.5671	0.5671	-0.1717	BRD-K41783120	STA-5326
CTSL	A375	0.000838426	0.414508	0.0616819	0.0616819	0.121742	0.0424	-0.86025	-0.0155	-0.6518	-0.6518	-0.9227	BRD-K05104363	PD-184352
CTSL	A375	0.000846971	0.0495598	0.0560596	0.0560596	0.146302	0.0424	-0.49015	-1.1045	-0.2143	-0.2143	-0.3181	BRD-A94756469	digoxin
CTSL	HT29	0.000870568	0.939743	0.0695766	0.0695766	0.140265	-0.0918	0.59915	-0.1473	0.5782	0.5782	0.6169	BRD-A56085258	LGX-818
CTSL	PC3	0.000872532	0.292052	0.0695297	0.0695297	0.457706	-0.0109	1.3159	0.6904	0.6809	0.6809	0.1666	BRD-K47869605	podophyllotoxin
CTSL	HA1E	0.000890659	0.0999178	0.0618895	0.0618895	0.0269696	0.0294	1.4943	1.10565	0.6235	0.6235	1.68295	BRD-K92571446	WZ-3105
CTSL	HA1E	0.000911822	0.422742	0.0174977	0.0174977	0.13099	0.0294	0.9924	0.9924	1.0615	1.0615	0.9079	BRD-K68191783	ALW-II-38-3
CTSL	PC3	0.000917068	0.0702809	0.0183262	0.0183262	0.084143	-0.0109	0.62155	1.1118	1.1118	1.1118	0.7512	BRD-K27938825	ASA-404
CTSL	HT29	0.000943808	0.907006	0.160227	0.160227	0.0307591	-0.0918	0.9078	-0.1656	0.4685	0.4685	2.4384	BRD-K86118762	linsitinib
CTSL	A375	0.000961025	0.443503	0.0313024	0.0313024	0.255255	0.0424	0.80395	0.3004	0.8531	0.8531	0.7548	BRD-K33226500	indinavir
CTSL	HA1E	0.000963788	0.761843	0.136234	0.136234	0.00230191	0.0294	0.2721	0.1366	0.2283	0.2283	0.62895	BRD-K49865102	PD-0325901
CTSL	A375	0.000967007	0.438853	0.166685	0.166685	0.0178629	0.0424	0.6339	0.3082	0.3082	0.3082	1.3933	BRD-K12502280	TG-101348
CTSL	A375	0.000980319	0.030946	0.0372113	0.0372113	0.174413	0.0424	1.3988	1.3891	1.216	1.216	1.5179	BRD-U64521890	XMD-16144
CTSL	A375	0.000983105	0.146165	0.0413001	0.0413001	0.142395	0.0424	-0.71365	-0.7857	-0.7857	-0.7857	-0.4821	BRD-K85307935	novobiocin
CTSL	HT29	0.000985764	0.664796	0.221629	0.221629	0.722042	-0.0918	1.00515	-0.2537	-0.0599	-0.0599	0.1061	BRD-K56844688	epirubicin
CTSL	HA1E	0.00099038	0.27917	0.105662	0.105662	0.0813142	0.0294	-0.6721	-0.6833	-0.2476	-0.2476	-0.8504	BRD-A10967948	granisetron
CTSL	HA1E	0.000994619	0.0518483	0.0326283	0.0326283	0.0496355	0.0294	0.78045	2.1129	0.5976	0.5976	0.9633	BRD-A17411484	carprofen
CTSL	HT29	0.000994967	0.369858	0.16776	0.16776	0.0865409	-0.0918	1.1377	0.9891	0.9517	0.9517	1.8337	BRD-K26667523	TAK-733
CTSL	HT29	0.00104293	0.249859	0.14125	0.14125	0.133486	-0.0918	0.7581	0.7002	0.4312	0.4312	0.5448	BRD-K83972459	JWE-035
CTSL	HA1E	0.00106553	0.163259	0.00889406	0.00889406	0.335996	0.0294	-0.6057	-0.5693	-0.6689	-0.6689	-0.1234	BRD-K02900412	clofoctol
CTSL	A549	0.0010755	0.0942967	0.0597959	0.0597959	0.114623	0.02615	-0.87035	-0.6805	-0.4143	-0.4143	-1.4182	BRD-K93747373	HG-5-113-01
CTSL	PC3	0.00108835	0.139873	0.0336327	0.0336327	0.324866	-0.0109	-0.61615	-0.3691	-0.4928	-0.4928	-0.0974	BRD-A27376179	lestaurtinib
CTSL	A375	0.00108917	0.0320683	0.0264661	0.0264661	0.570463	0.0424	-0.66415	-1.585	-0.5757	-0.5757	-0.5232	BRD-K23228615	GDC-0980
CTSL	HEPG2	0.00109103	0.708656	0.00769228	0.00769228	0.823441	-0.17825	0.45095	-0.0207	0.663	0.663	-0.0207	BRD-K60866521	idelalisib
CTSL	HEPG2	0.00109935	0.538158	0.292964	0.292964	0.0632324	-0.17825	0.67295	0.458	0.458	0.458	0.8741	BRD-K04887706	AKT-inhibitor-1-2
CTSL	MCF7	0.00110451	0.0765812	0.0207445	0.0207445	0.198413	-0.0333	0.53695	1.20315	0.5935	0.5935	0.5139	BRD-K09951645	dabrafenib
CTSL	MCF7	0.00112471	0.231804	0.113825	0.113825	0.130012	-0.0333	-0.57645	-0.714	-0.49195	-0.49195	-0.2369	BRD-K99252563	QL-XII-47
CTSL	HA1E	0.001131	0.606382	0.193915	0.193915	0.263583	0.0294	-0.16735	0.13625	-0.09015	-0.09015	0.00175	BRD-K49328571	dasatinib
CTSL	A375	0.00114166	0.629723	0.265752	0.265752	0.0228259	0.0424	0.64325	-0.1074	0.3144	0.3144	1.9258	BRD-A34006693	suprofen
CTSL	HCC515	0.00114275	0.263642	0.243065	0.243065	0.0181924	-0.1524	0.4514	0.1436	-0.0049	-0.0049	0.9591	BRD-K64890080	BI-2536
CTSL	A375	0.00120526	0.365752	0.168148	0.168148	0.00749121	0.0424	0.7171	0.5887	0.3182	0.3182	1.6156	BRD-K78113049	enoxacin
CTSL	HA1E	0.00120909	0.664606	0.325998	0.325998	0.00664609	0.0294	-1.0913	-0.2154	-0.1962	-0.1962	-1.6805	BRD-A27376179	lestaurtinib
CTSL	HA1E	0.00123037	0.464611	0.285826	0.285826	0.495473	0.0294	-0.4605	0.3045	-0.3338	-0.3338	0.4808	BRD-K88378636	withaferin-a
CTSL	PC3	0.0012354	0.253483	0.007339	0.007339	0.231827	-0.0109	0.6624	0.9264	0.9264	0.9264	0.64635	BRD-K55127134	fluphenazine
CTSL	MCF7	0.0012771	0.0299639	0.00809928	0.00809928	0.028955	-0.0333	-0.6378	-1.1787	-0.81275	-0.81275	-0.8511	BRD-K04853698	LDN-193189
CTSL	HEPG2	0.00128824	0.197867	0.000414589	0.000414589	0.696691	-0.17825	0.5225	0.527	0.9059	0.9059	-0.1025	BRD-K16485616	mocetinostat
CTSL	HA1E	0.00129864	0.0768615	0.199811	0.199811	0.114074	0.0294	-0.6997	-1.5238	-0.423	-0.423	-0.8964	BRD-K89561498	SN-38
CTSL	HT29	0.0013325	0.700325	0.213356	0.213356	0.482016	-0.0918	0.4855	0.2357	0.1822	0.1822	0.186	BRD-K28822270	resminostat
CTSL	HA1E	0.00133396	0.947813	0.108379	0.108379	0.21419	0.0294	-0.62085	-0.282	-0.3216	-0.3216	-0.3588	BRD-K72636697	QL-X-138
CTSL	PC3	0.00134471	0.129079	0.0398774	0.0398774	0.0727966	-0.0109	0.5744	0.5894	0.4651	0.4651	0.6334	BRD-K07106112	BMS-599626
CTSL	HEPG2	0.00134747	0.688756	0.328206	0.328206	0.103871	-0.17825	0.44015	0.2662	0.3755	0.3755	0.2962	BRD-K42191735	buparlisib
CTSL	HEPG2	0.00135758	0.0878194	0.00189861	0.00189861	0.233702	-0.17825	0.72375	1.0881	1.0792	1.0792	1.0047	BRD-K09991945	GSK-3-inhibitor-II
CTSL	HCC515	0.00137868	0.52502	0.00259071	0.00259071	0.906218	-0.1524	0.4503	-0.0357	0.9793	0.9793	0.1744	BRD-K85606544	neratinib
CTSL	A375	0.0013845	0.208317	0.0655262	0.0655262	0.186691	0.0424	0.73815	1.2577	0.6689	0.6689	0.5175	BRD-K21548250	moracizine
CTSL	HA1E	0.0013898	0.319458	0.0255992	0.0255992	0.271804	0.0294	0.6069	0.2785	0.6159	0.6159	0.5035	BRD-K17561142	amiodarone
CTSL	HCC515	0.0013945	0.443001	0.0303675	0.0303675	0.0979611	-0.1524	0.42535	0.1794	0.2992	0.2992	1.2693	BRD-K68191783	ALW-II-38-3
CTSL	PC3	0.00139692	0.0654635	0.0169642	0.0169642	0.601852	-0.0109	0.81305	1.2233	0.9604	0.9604	-0.226	BRD-K50000283	PHA-767491
CTSL	A375	0.00140473	0.191477	0.0506928	0.0506928	0.151404	0.0424	0.98005	1.1171	0.3293	0.3293	1.464	BRD-K72029282	probucol
CTSL	HA1E	0.00141236	0.441779	0.0239775	0.0239775	0.644534	0.0294	1.02155	0.574	0.8781	0.8781	-0.267	BRD-K26341917	L-ergothioneine
CTSL	MCF7	0.00141354	0.828591	0.00325939	0.00325939	0.70343	-0.0333	0.8262	-0.0118	1.2495	1.2495	0.5559	BRD-K81332461	maxacalcitol
CTSL	HA1E	0.00141606	0.0619526	0.0170981	0.0170981	0.0993258	0.0294	-0.7251	-0.7299	-0.7203	-0.7203	-0.7858	BRD-K15592317	CP-466722
CTSL	A549	0.00146336	0.409283	0.0723596	0.0723596	0.087948	0.02615	0.5744	0.5744	0.5619	0.5619	0.5549	BRD-K60866521	idelalisib
CTSL	PC3	0.00146699	0.0610595	0.0983071	0.0983071	0.00970383	-0.0109	-1.12975	-1.1097	-0.5789	-0.5789	-1.614	BRD-A36331462	oprozomib
CTSL	HEPG2	0.00148451	0.00772136	0.0167928	0.0167928	0.873981	-0.17825	0.911	1.2456	0.9319	0.9319	-0.0852	BRD-K92571446	WZ-3105
CTSL	PC3	0.00148602	0.0113986	0.00414538	0.00414538	0.0635857	-0.0109	0.8724	1.2197	1.1968	1.1968	1.1417	BRD-A03506276	XL-888
CTSL	HEPG2	0.00148823	0.369631	0.0706066	0.0706066	0.0285073	-0.17825	0.2518	0.08005	0.0645	0.0645	0.4096	BRD-K79090631	CGP-60474
CTSL	PC3	0.00150851	0.666021	0.0447775	0.0447775	0.0371049	-0.0109	-1.4464	-0.5798	-1.4599	-1.4599	-1.59885	BRD-K88510285	bortezomib
CTSL	HA1E	0.00152471	0.957613	0.0801304	0.0801304	0.226982	0.0294	0.95845	-0.2413	0.8915	0.8915	0.8541	BRD-A10523515	GSK-429286A
CTSL	PC3	0.00154757	0.169189	0.0502048	0.0502048	0.507543	-0.0109	0.84885	0.4704	0.4704	0.4704	0.4976	BRD-K84163249	ercalcitriol
CTSL	HEPG2	0.00155199	0.229507	0.0220451	0.0220451	0.657364	-0.17825	0.8651	1.3926	1.0039	1.0039	-0.1589	BRD-K13390322	AT-7519
CTSL	HT29	0.00156947	0.043768	0.0475915	0.0475915	0.206289	-0.0918	0.49505	1.2193	0.4577	0.4577	0.404	BRD-K95237249	probenecid
CTSL	MCF7	0.00157504	0.12336	0.0393239	0.0393239	0.119671	-0.0333	-0.7254	-0.6778	-0.6778	-0.6778	-1.2578	BRD-A03506276	XL-888
CTSL	HA1E	0.00158895	0.803729	0.0131726	0.0131726	0.697803	0.0294	-0.7442	-0.5925	-0.7299	-0.7299	0.7844	BRD-K43586850	lacidipine
CTSL	A375	0.00161369	0.923496	0.288723	0.288723	0.0180053	0.0424	0.8826	0.4734	0.3943	0.3943	1.3598	BRD-K26657438	imiquimod
CTSL	A375	0.00162142	0.0854786	0.0116937	0.0116937	0.69436	0.0424	0.61075	0.587	0.587	0.587	0.2398	BRD-K22031190	diflunisal
CTSL	A375	0.00164033	0.0255991	0.0314136	0.0314136	0.237101	0.0424	-0.6182	-1.0481	-0.6668	-0.6668	-0.5696	BRD-K85119730	tolbutamide
CTSL	PC3	0.00164547	0.129837	0.0139127	0.0139127	0.775753	-0.0109	0.7638	1.101	0.693	0.693	-0.163	BRD-K25837718	josamycin
CTSL	HT29	0.00164585	0.234349	0.096287	0.096287	0.115348	-0.0918	0.5507	0.7448	0.3612	0.3612	1.4345	BRD-K82244583	binimetinib
CTSL	PC3	0.00166734	0.182095	0.235921	0.235921	0.0538505	-0.0109	-0.5848	-0.8928	-0.2549	-0.2549	-0.862	BRD-K55026842	azacitidine
CTSL	A375	0.00167193	0.153087	0.0708206	0.0708206	0.256074	0.0424	-1	-1.9803	-1.8543	-1.8543	-0.8233	BRD-K88573743	A-443654
CTSL	HT29	0.00168012	0.288794	0.0812551	0.0812551	0.0337518	-0.0918	0.69975	1.5893	0.4717	0.4717	0.7806	BRD-K62965247	tipifarnib-P2
CTSL	HEPG2	0.001708	0.517076	0.0441739	0.0441739	0.064776	-0.17825	0.568	-0.2231	0.5253	0.5253	0.8086	BRD-K68191783	ALW-II-38-3
CTSL	PC3	0.0017107	0.112692	0.0735987	0.0735987	0.0256887	-0.0109	1.15685	2.1619	0.8559	0.8559	1.1256	BRD-K17944737	artesunate
CTSL	HEPG2	0.00173325	0.237951	0.0709008	0.0709008	0.0868247	-0.17825	0.6364	0.3879	0.5048	0.5048	0.713	BRD-K68174511	torin-2
CTSL	HA1E	0.00173489	0.445879	0.277835	0.277835	0.0142739	0.0294	-0.6738	-0.4322	-0.1556	-0.1556	-1.3152	BRD-K79018442	KIN001-260
CTSL	PC3	0.00175835	0.0407585	0.00929255	0.00929255	0.0250338	-0.0109	-0.6459	-0.8749	-0.84035	-0.84035	-1.1386	BRD-A89585551	mefloquine
CTSL	HT29	0.00178323	0.115119	0.0669891	0.0669891	0.129942	-0.0918	0.643	0.9794	0.7411	0.7411	0.4597	BRD-K70610771	VX-222
CTSL	MCF7	0.00178764	0.142909	0.00378433	0.00378433	0.918805	-0.0333	1.1336	0.3015	1.1657	1.1657	-0.214	BRD-K70463136	BAY-87-2243
CTSL	A375	0.00179833	0.247159	0.0144177	0.0144177	0.493989	0.0424	0.8793	0.376	0.9829	0.9829	0.8793	BRD-K22024824	RG-4733
CTSL	HA1E	0.00182644	0.0370567	0.115481	0.115481	0.0215767	0.0294	0.7769	1.1031	0.7063	0.7063	1.3818	BRD-A29844814	ABT-202
CTSL	HT29	0.00183257	0.960201	0.123749	0.123749	0.703256	-0.0918	0.61855	0.1068	0.4687	0.4687	0.077	BRD-K52313696	tacedinaline
CTSL	HT29	0.00184959	0.0246958	0.0597812	0.0597812	0.501569	-0.0918	0.404	0.8919	0.165	0.165	0.55795	BRD-K67868012	PI-103
CTSL	HA1E	0.00185895	0.0587236	0.0233128	0.0233128	0.506453	0.0294	0.7718	1.231	0.4393	0.4393	-0.07	BRD-K90777969	cutamesine
CTSL	PC3	0.00185982	0.0259712	0.40801	0.40801	0.119893	-0.0109	-0.808	-1.71735	-0.23985	-0.23985	-0.7481	BRD-K15108141	gemcitabine
CTSL	HA1E	0.00186399	0.860538	0.278968	0.278968	0.130457	0.0294	0.59205	0.1425	0.3897	0.3897	0.6889	BRD-K19220233	JNK-9L
CTSL	HEPG2	0.00189205	0.638043	0.195348	0.195348	0.122172	-0.17825	0.49185	-0.088	-0.088	-0.088	0.6706	BRD-K68407802	KIN001-055
CTSL	HA1E	0.00191258	0.324266	0.169438	0.169438	0.139974	0.0294	0.8449	0.2971	0.6214	0.6214	0.7007	BRD-K43389698	BMS-387032
CTSL	HEPG2	0.00194789	0.899458	0.120281	0.120281	0.641888	-0.17825	0.46405	-0.1244	0.0714	0.0714	-0.3408	BRD-K66847579	WZ-7043
CTSL	HA1E	0.00195176	0.295668	0.102759	0.102759	0.170202	0.0294	-0.72485	-0.2177	-0.2177	-0.2177	-0.6228	BRD-K19761926	eplerenone
CTSL	A375	0.00197722	0.399931	0.148437	0.148437	0.69219	0.0424	-0.73335	-0.9403	-0.4624	-0.4624	0.0641	BRD-K27182532	metatinib
CTSL	MCF7	0.00202134	0.0144954	0.00236422	0.00236422	0.360323	-0.0333	0.79215	1.1462	1.1076	1.1076	0.7196	BRD-K78659596	ixazomib
CTSL	HA1E	0.00202414	0.017247	0.126707	0.126707	0.532617	0.0294	0.71945	1.307	0.594	0.594	0.155	BRD-K75958547	pitavastatin
CTSL	HA1E	0.00202678	0.138057	0.456851	0.456851	0.000104322	0.0294	-0.6807	-0.37675	-0.08015	-0.08015	-1.5223	BRD-K79254416	decitabine
CTSL	HT29	0.00203033	0.709131	0.0174852	0.0174852	0.945248	-0.0918	0.87805	-0.2872	1.5778	1.5778	-0.075	BRD-U07805514	saracatinib
CTSL	HA1E	0.00205916	0.223968	0.464357	0.464357	0.016128	0.0294	-0.76265	-0.1789	-0.1789	-0.1789	-1.1246	BRD-K86525559	AZD-7762
CTSL	HEPG2	0.0020791	0.0950422	0.00240677	0.00240677	0.886705	-0.17825	0.60605	0.822	0.822	0.822	-0.3768	BRD-K72703948	ZM-447439
CTSL	PC3	0.00208249	0.120012	0.0308263	0.0308263	0.895036	-0.0109	0.83985	0.9832	0.7164	0.7164	0.1482	BRD-K65781196	avanafil
CTSL	HT29	0.00209153	0.302018	0.725014	0.725014	0.050812	-0.0918	0.7383	1.3702	0.1157	0.1157	0.9011	BRD-U64521890	XMD-16144
CTSL	PC3	0.00210039	0.0280274	0.0773871	0.0773871	0.275553	-0.0109	-0.6478	-1.1068	-0.4231	-0.4231	-0.72465	BRD-A66419424	ixazomib-citrate
CTSL	HA1E	0.00212306	0.0767795	0.0507109	0.0507109	0.180867	0.0294	-0.6247	-0.7155	-0.702	-0.702	-0.4311	BRD-K14653796	tasquinimod
CTSL	PC3	0.00219604	0.223835	0.130108	0.130108	0.0340954	-0.0109	-0.68315	-0.6907	-0.6907	-0.6907	-1.3652	BRD-K07798980	PSI-6130
CTSL	HT29	0.00223248	0.225907	0.126554	0.126554	0.0548004	-0.0918	0.79265	0.9165	0.1048	0.1048	0.6688	BRD-K97428065	netupitant
CTSL	HT29	0.00225632	0.264387	0.581609	0.581609	0.00170867	-0.0918	0.85155	0.7082	-0.1178	-0.1178	1.03575	BRD-K13390322	AT-7519
CTSL	HT29	0.00227628	0.44644	0.170587	0.170587	0.41693	-0.0918	0.92685	0.3805	0.536	0.536	1.1417	BRD-A48570745	ivermectin
CTSL	MCF7	0.00227709	0.027343	0.0226838	0.0226838	0.0224412	-0.0333	0.869	1.1717	0.7446	0.7446	1.4413	BRD-K77396579	NVP-DPP728
CTSL	PC3	0.00228412	0.623953	0.00322099	0.00322099	0.0724782	-0.0109	-0.8684	-0.5111	-0.9382	-0.9382	-0.9143	BRD-K59325863	delanzomib
CTSL	A375	0.00229155	0.561181	0.0845285	0.0845285	0.102567	0.0424	0.73845	0.5307	0.532	0.532	0.7987	BRD-K33852358	arofylline
CTSL	HT29	0.00231931	0.322841	0.0552854	0.0552854	0.229334	-0.0918	0.6458	0.0714	0.6915	0.6915	0.4177	BRD-A68009927	daunorubicin
CTSL	A375	0.00232676	0.745672	0.0504262	0.0504262	0.955457	0.0424	-0.60425	-0.2889	-0.5907	-0.5907	0.0658	BRD-K35245662	ciclesonide
CTSL	HCC515	0.00233071	0.796763	0.315292	0.315292	0.00657078	-0.1524	0.38155	0.0486	0.0486	0.0486	1.4825	BRD-K37687095	AZD-8330
CTSL	HEPG2	0.00233254	0.997855	0.574113	0.574113	0.0062587	-0.17825	0.5521	0.0425	0.0567	0.0567	1.4501	BRD-K12502280	TG-101348
CTSL	HEPG2	0.00233906	0.388184	0.0776512	0.0776512	0.489647	-0.17825	0.6012	0.1477	0.43975	0.43975	0.0159	BRD-K93788137	PF-431396
CTSL	HT29	0.00235846	0.876323	0.12723	0.12723	0.0657072	-0.0918	0.3923	0.2348	0.33355	0.33355	0.9049	BRD-K28936863	ketotifen
CTSL	PC3	0.00236902	0.0251636	0.000843191	0.000843191	0.585941	-0.0109	-0.9173	-1.5793	-1.3726	-1.3726	-0.8544	BRD-A74914197	pralatrexate
CTSL	HCC515	0.00237685	0.0243167	0.207128	0.207128	0.131843	-0.1524	0.5887	1.448	0.2083	0.2083	0.8091	BRD-K64800655	PHA-793887
CTSL	MCF7	0.00241302	0.600501	0.00122983	0.00122983	0.217502	-0.0333	0.958	0.671	1.3551	1.3551	0.1352	BRD-K93779381	ingenol-mebutate
CTSL	A549	0.00242705	0.592225	0.19361	0.19361	0.0322747	0.02615	0.5404	0.5581	0.5021	0.5021	0.7673	BRD-K79090631	CGP-60474
CTSL	A549	0.0024696	0.239495	0.148584	0.148584	0.589521	0.02615	-0.6891	-0.71035	-0.35555	-0.35555	-0.4501	BRD-A39996500	radicicol
CTSL	PC3	0.00248004	0.855262	0.0312306	0.0312306	0.319006	-0.0109	-0.75305	-0.1667	-0.5839	-0.5839	-0.0666	BRD-K86301799	dipyridamole
CTSL	HA1E	0.00248457	0.61396	0.0443613	0.0443613	0.231557	0.0294	0.93375	0.8372	1.0355	1.0355	1.0104	BRD-K82967685	mirodenafil
CTSL	HT29	0.00248627	0.515884	0.066125	0.066125	0.351686	-0.0918	0.7095	0.7095	0.62695	0.62695	0.8766	BRD-K95142244	talazoparib
CTSL	HT29	0.00249308	0.69813	0.00803852	0.00803852	0.0486844	-0.0918	0.8397	0.6163	1.16385	1.16385	0.7052	BRD-K54520417	LXR-623
CTSL	A549	0.00250326	0.587539	0.067017	0.067017	0.0486388	0.02615	-0.7938	-0.6758	-0.7805	-0.7805	-1.3009	BRD-K99749624	linifanib
CTSL	HCC515	0.00252461	0.0893841	0.0240539	0.0240539	0.280379	-0.1524	0.30095	0.4955	0.4955	0.4955	0.1787	BRD-K52911425	GDC-0941
CTSL	HA1E	0.00254779	0.217292	0.216411	0.216411	0.286671	0.0294	0.7126	0.6019	0.1546	0.1546	0.6278	BRD-K48488978	YM-201636
CTSL	MCF7	0.00257174	0.0703495	0.43527	0.43527	0.0619733	-0.0333	0.93635	0.7611	0.559	0.559	0.8915	BRD-K00259736	colchicine
CTSL	PC3	0.0025802	0.0369824	0.105918	0.105918	0.0540996	-0.0109	0.85425	0.9344	0.9344	0.9344	0.7939	BRD-K28731095	calcitriol
CTSL	A549	0.00258122	0.303963	0.266721	0.266721	0.654641	0.02615	-0.6626	-0.772	-0.48655	-0.48655	-0.13095	BRD-K03406345	azacitidine
CTSL	HCC515	0.0025987	0.169019	0.697188	0.697188	0.00368248	-0.1524	0.6777	0.6692	0.1272	0.1272	2.0372	BRD-K57169635	dacomitinib
CTSL	HA1E	0.00268747	0.209686	0.266685	0.266685	0.222099	0.0294	-0.59075	-0.5207	-0.1491	-0.1491	-0.6608	BRD-K81458380	CX-4945
CTSL	HT29	0.00269181	0.350381	0.228217	0.228217	0.483086	-0.0918	-0.60035	-0.5476	-0.54075	-0.54075	-0.37035	BRD-K33379087	tivantinib
CTSL	HA1E	0.00271202	0.0383192	0.303438	0.303438	0.00280774	0.0294	-0.38225	-1.13835	-0.15445	-0.15445	-1.2846	BRD-A39996500	radicicol
CTSL	HT29	0.00272889	0.108441	0.00357037	0.00357037	0.0896711	-0.0918	0.52655	2.0619	0.9489	0.9489	0.5947	BRD-K78567475	dolastatin-10
CTSL	HA1E	0.00274481	0.19212	0.000684949	0.000684949	0.0610382	0.0294	-0.589	-0.3456	-0.6596	-0.6596	-1.16715	BRD-K59317601	MLN-0128
CTSL	HEPG2	0.00274661	0.657364	0.0662236	0.0662236	0.217244	-0.17825	0.3577	0.3089	0.3444	0.3444	0.3321	BRD-U24835547	GSK-1059615
CTSL	HT29	0.00275055	0.184974	0.893955	0.893955	0.028652	-0.0918	0.5421	0.203	0.0543	0.0543	3.1738	BRD-K12867552	PCI-24781
CTSL	A375	0.00275393	0.0360793	0.00905902	0.00905902	0.840025	0.0424	0.6881	1.2028	0.96105	0.96105	-0.1624	BRD-K05395900	nicotine
CTSL	MCF7	0.00277145	0.729031	0.194913	0.194913	0.124241	-0.0333	0.57935	0.2224	0.4099	0.4099	0.6938	BRD-A43882281	pinacidil
CTSL	PC3	0.00281595	0.104549	0.00655767	0.00655767	0.816628	-0.0109	0.681	1.1494	0.7476	0.7476	-0.1807	BRD-K69116396	sertindole
CTSL	MCF7	0.00289727	0.00780588	0.0546177	0.0546177	0.540181	-0.0333	-1.0142	-1.5147	-0.725	-0.725	-0.3098	BRD-K07954936	2-iminobiotin
CTSL	A375	0.00290096	0.159091	0.0600221	0.0600221	0.0416262	0.0424	-0.7196	-0.9468	-0.942	-0.942	-1.3703	BRD-K85140930	aphidicolin
CTSL	PC3	0.00290907	0.24063	0.0716713	0.0716713	0.0802692	-0.0109	0.83035	0.9794	0.4011	0.4011	0.8475	BRD-K21396683	marimastat
CTSL	HA1E	0.00293678	0.60775	0.0189325	0.0189325	0.117939	0.0294	0.7478	0.182	0.4829	0.4829	0.8437	BRD-K12502280	TG-101348
CTSL	HCC515	0.00296021	0.822243	0.191952	0.191952	0.230132	-0.1524	0.6275	-0.4693	0.3677	0.3677	0.5164	BRD-K86797399	SB-939
CTSL	A375	0.00296382	0.101335	0.010779	0.010779	0.294405	0.0424	-0.6141	-1.225	-0.6391	-0.6391	-0.5891	BRD-A67862938	naftidrofuryl
CTSL	HT29	0.00296433	0.256218	0.00579004	0.00579004	0.434147	-0.0918	0.58045	0.2239	0.9365	0.9365	0.453	BRD-K65781196	avanafil
CTSL	PC3	0.00298716	0.0148186	0.0255639	0.0255639	0.126206	-0.0109	1.03875	1.3596	1.3596	1.3596	1.221	BRD-K91544578	nikethamide
CTSL	A375	0.00298892	0.0402712	0.064377	0.064377	0.00337962	0.0424	-0.76695	-0.7579	-0.5207	-0.5207	-2.5259	BRD-K68747584	PF-03814735
CTSL	HEPG2	0.00300935	0.0284596	0.310255	0.310255	0.00919073	-0.17825	0.6498	0.8673	0.1453	0.1453	1.2691	BRD-K40175214	torin-1
CTSL	HT29	0.00301319	0.644821	0.175982	0.175982	0.0159706	-0.0918	-0.87245	-0.7192	-0.5662	-0.5662	-1.5294	BRD-K09537769	NU-7026
CTSL	PC3	0.00301893	0.034011	0.00670767	0.00670767	0.83141	-0.0109	0.55165	1.2184	0.6355	0.6355	-0.0673	BRD-K21450440	benzthiazide
CTSL	A549	0.00302134	0.0889755	0.0952953	0.0952953	0.3797	0.02615	0.49995	0.7385	0.25795	0.25795	0.20575	BRD-K92428232	GSK-461364
CTSL	A375	0.00303774	0.105698	0.0329818	0.0329818	0.320403	0.0424	-0.65325	-0.8014	-0.5051	-0.5051	-0.9857	BRD-K10961822	latanoprost
CTSL	HT29	0.00306342	0.805263	0.0815539	0.0815539	0.138415	-0.0918	0.5019	0.4818	0.5165	0.5165	0.5019	BRD-A97437073	rosiglitazone
CTSL	A549	0.00310019	0.702068	0.179587	0.179587	0.387864	0.02615	0.43605	0.1729	0.1729	0.1729	0.0952	BRD-K79259477	NVP-BHG712
CTSL	PC3	0.00310075	0.0193441	0.174248	0.174248	0.0118782	-0.0109	0.6722	1.3502	0.6722	0.6722	1.6219	BRD-K35960502	niclosamide
CTSL	A549	0.00312765	0.848806	0.768741	0.768741	0.00382763	0.02615	0.4132	0.16715	0.0773	0.0773	1.073	BRD-K26818574	BIX-01294
CTSL	A375	0.00315178	0.431358	0.29337	0.29337	0.316126	0.0424	1.08995	-0.6702	0.7294	0.7294	0.785	BRD-K98004573	rupatadine
CTSL	MCF7	0.00315343	0.0280644	0.00449125	0.00315343	0.376167	-0.0333	0.8454	1.1579	0.8354	0.8454	1.1567	BRD-K37846922	3,3'-diindolylmethane
CTSL	HT29	0.00319772	0.444083	0.0104055	0.0104055	0.593278	-0.0918	0.7584	0.8026	1.0582	1.0582	0.3213	BRD-A36331462	oprozomib
CTSL	HT29	0.00327083	0.194653	0.159155	0.159155	0.0140482	-0.0918	0.7257	-1.3611	0.3571	0.3571	1.3524	BRD-A72390365	choline-alfoscerate
CTSL	A375	0.00329929	0.355967	0.000945652	0.000945652	0.558872	0.0424	-0.65045	-0.2924	-0.8963	-0.8963	-0.5028	BRD-A50764878	MDL-73005EF
CTSL	A375	0.00330311	0.211004	0.0190994	0.0548789	0.112285	0.0424	-0.5407	-0.42	-0.5407	-0.50365	-0.66405	BRD-A17883755	lenalidomide
CTSL	MCF7	0.0033104	0.136886	0.0453171	0.0453171	0.119052	-0.0333	0.4457	0.7918	0.4605	0.4605	1.7607	BRD-K79131256	albendazole
CTSL	HT29	0.00332846	0.933456	0.16153	0.16153	0.0839847	-0.0918	0.5645	-0.1047	0.4395	0.4395	0.9612	BRD-K24496482	SB-590885
CTSL	A375	0.00334346	0.0482666	0.0630912	0.0630912	0.0534327	0.0424	-0.6016	-0.6827	-0.61755	-0.61755	-1.6603	BRD-K06569345	HG-5-88-01
CTSL	HCC515	0.00334876	0.595062	0.20826	0.20826	0.401824	-0.1524	0.50595	-0.1734	0.0233	0.0233	0.1263	BRD-K73368362	BIX-02189
CTSL	HCC515	0.00336061	0.232267	0.0250535	0.0250535	0.598864	-0.1524	0.3802	0.5994	0.5994	0.5994	-0.096	BRD-K16730910	regorafenib
CTSL	A549	0.00339435	0.299298	0.485802	0.485802	0.206474	0.02615	0.4807	0.28115	0.1685	0.1685	0.7263	BRD-K77908580	entinostat
CTSL	HA1E	0.00345202	0.030701	0.100506	0.100506	0.146702	0.0294	0.71015	1.2555	0.6554	0.6554	0.859	BRD-K26657438	imiquimod
CTSL	MCF7	0.003586	0.726602	0.259265	0.259265	0.159825	-0.0333	0.4198	-0.0704	-0.0178	-0.0178	0.4198	BRD-U64521890	XMD-16144
CTSL	A375	0.00358806	0.0293085	0.00645939	0.00358806	0.293054	0.0424	-0.5686	-0.8137	-0.6314	-0.5686	-0.1283	BRD-K93944989	safingol
CTSL	A375	0.00362554	0.00533809	0.00595864	0.00595864	0.251995	0.0424	-0.9481	-1.5765	-1.4568	-1.4568	1.7615	BRD-K89014967	AS-703026
CTSL	A375	0.0036924	0.328236	0.051459	0.051459	0.116476	0.0424	-0.28245	-0.0882	-0.2463	-0.2463	-0.5487	BRD-K02708799	GSK-1059615
CTSL	A375	0.00369714	0.0336325	0.109691	0.109691	0.0387686	0.0424	-0.52065	-1.6836	-0.3805	-0.3805	-1.0544	BRD-K74305673	IKK-2-inhibitor-V
CTSL	HT29	0.00372599	0.531647	0.142642	0.142642	0.0659976	-0.0918	0.6529	0.3157	0.3157	0.3157	1.4258	BRD-K94534639	LY-2811376
CTSL	HA1E	0.00375666	0.437119	0.0119191	0.0119191	0.332547	0.0294	0.5454	0.1613	0.7003	0.7003	0.4839	BRD-K53979406	ALX-5407
CTSL	A375	0.00375877	0.329068	0.0253909	0.0253909	0.39692	0.0424	0.60405	0.6043	0.7553	0.7553	0.6038	BRD-K42728290	NVP-BGJ398
CTSL	HCC515	0.0038136	0.0156238	0.00261753	0.00261753	0.00797852	-0.1524	-0.79925	-1.8115	-1.09365	-1.09365	-1.10805	BRD-A39996500	radicicol
CTSL	MCF7	0.003855	0.612794	0.592497	0.592497	0.0142436	-0.0333	0.57955	0.2153	0.2153	0.2153	2.0579	BRD-K19388745	colforsin-daproate
CTSL	PC3	0.00389513	0.0277431	0.0915817	0.0915817	0.0032977	-0.0109	-0.76015	-1.4521	-0.5007	-0.5007	-2.6108	BRD-K88573743	A-443654
CTSL	A375	0.00398577	0.183604	0.118106	0.118106	0.110427	0.0424	-0.6269	-0.9925	-0.45375	-0.45375	-0.9268	BRD-K26667523	TAK-733
CTSL	HA1E	0.00402897	0.00481148	0.000635098	0.000635098	0.332547	0.0294	0.7811	1.8923	1.5363	1.5363	0.6048	BRD-A19195498	trimipramine
CTSL	A375	0.00403508	0.447301	0.685025	0.685025	0.0667407	0.0424	-0.81875	-0.5485	-0.5277	-0.5277	-1.1712	BRD-K95142244	talazoparib
CTSL	HA1E	0.00405459	0.155957	0.0543029	0.0543029	0.166251	0.0294	0.5354	0.3666	0.3666	0.3666	0.543	BRD-K50387473	XMD-892
CTSL	PC3	0.00406397	0.656259	0.998435	0.998435	0.0547906	-0.0109	0.8479	0.2557	-0.1743	-0.1743	1.37685	BRD-K92571446	WZ-3105
CTSL	MCF7	0.0040648	0.165026	0.0188797	0.0188797	0.702091	-0.0333	-0.7845	-1.0692	-0.8601	-0.8601	0.5874	BRD-K19456237	piracetam
CTSL	HT29	0.00410566	0.194313	0.256593	0.256593	0.145932	-0.0918	0.7273	0.7986	0.7418	0.7418	0.2684	BRD-K09711437	varespladib
CTSL	PC3	0.00410594	0.511392	0.0425375	0.0425375	0.253068	-0.0109	-0.5345	-0.5345	-0.5345	-0.5345	-0.252	BRD-K75308783	SAR-245409
CTSL	A549	0.00414591	0.288977	0.485802	0.485802	0.0147494	0.02615	0.5	0.3315	-0.0283	-0.0283	1.1112	BRD-K17743125	belinostat
CTSL	PC3	0.00414625	0.043853	0.0254879	0.0254879	0.14852	-0.0109	0.6756	0.8564	0.7654	0.7654	0.3654	BRD-A19736161	ondansetron
CTSL	PC3	0.00415697	0.0750578	0.0212425	0.0212425	0.461346	-0.0109	-0.83545	-0.6877	-0.6877	-0.6877	-0.103	BRD-K99252563	QL-XII-47
CTSL	HA1E	0.00416383	0.157109	0.09703	0.09703	0.193702	0.0294	-0.74815	-0.4305	-0.4305	-0.4305	-0.4683	BRD-K47983010	BX-795
CTSL	HT29	0.00418727	0.334584	0.0664391	0.0664391	0.630005	-0.0918	0.56005	0.3805	0.3805	0.3805	0.2212	BRD-K06674495	nafamostat
CTSL	HT29	0.00420997	NA	NA	NA	NA	-0.0918	-0.192	NA	NA	NA	NA	BRD-K50691590	bortezomib
CTSL	HT29	0.00422194	0.514608	0.0134128	0.0134128	0.407355	-0.0918	0.57065	0.2219	0.6118	0.6118	-0.0358	BRD-K33141550	L-NAME
CTSL	HEPG2	0.00424748	0.308283	0.0332164	0.0332164	0.581577	-0.17825	0.46805	0.2198	0.4349	0.4349	0.1111	BRD-K86856088	UNC-0638
CTSL	HA1E	0.00428262	0.562764	0.0301064	0.0301064	0.740205	0.0294	-0.8887	-0.8887	-0.8887	-0.8887	-0.5246	BRD-A29734509	disopyramide
CTSL	MCF7	0.00429732	0.100432	0.0501931	0.0501931	0.017925	-0.0333	0.7728	0.7969	0.7969	0.7969	1.0919	BRD-K78692225	leflunomide
CTSL	A375	0.00430532	0.220986	0.0560596	0.0560596	0.12855	0.0424	0.63925	1.1714	1.1714	1.1714	0.6034	BRD-K56844688	epirubicin
CTSL	MCF7	0.00431473	0.0409333	0.194108	0.194108	0.238729	-0.0333	0.4502	1.3093	0.3027	0.3027	0.2762	BRD-A05821830	docetaxel
CTSL	A375	0.00434874	0.0583325	0.0014417	0.0014417	0.280203	0.0424	0.68515	0.68	1.4247	1.4247	0.4509	BRD-K26619122	thiocolchicoside
CTSL	PC3	0.00435038	0.116249	0.104003	0.104003	0.0490086	-0.0109	0.6681	1.0957	0.1904	0.1904	0.942	BRD-K32405725	etomoxir
CTSL	MCF7	0.00435479	0.0721173	0.12315	0.12315	0.695746	-0.0333	0.9549	1.0294	0.6877	0.6877	-0.0548	BRD-A36331462	oprozomib
CTSL	HT29	0.00443822	0.0570838	0.0134128	0.0134128	0.513333	-0.0918	0.7905	1.6395	0.7682	0.7682	0.902	BRD-K01436366	XMD-1150
CTSL	HT29	0.00444383	0.29971	0.51736	0.51736	0.64128	-0.0918	0.7585	1.0189	-0.0521	-0.0521	0.1016	BRD-K16485616	mocetinostat
CTSL	MCF7	0.0044714	0.673508	0.170205	0.170205	0.0168067	-0.0333	-0.2968	0.19595	-0.15765	-0.15765	-0.4662	BRD-A19500257	geldanamycin
CTSL	A375	0.00450336	0.514026	0.417065	0.417065	0.0284458	0.0424	0.6231	0.4058	0.3047	0.3047	0.957	BRD-K64890080	BI-2536
CTSL	A375	0.00452145	0.129044	0.003823	0.003823	0.479867	0.0424	-0.4068	-0.6393	-0.7919	-0.7919	-0.2383	BRD-K24496482	SB-590885
CTSL	HA1E	0.00453613	0.942329	0.0388032	0.0388032	0.00967854	0.0294	0.84975	-0.0315	1.0358	1.0358	1.3454	BRD-K15170068	swainsonine
CTSL	A375	0.00466979	0.449942	0.0661071	0.0661071	0.0446603	0.0424	-0.76845	-0.7444	-0.7925	-0.7925	-0.9444	BRD-K62200014	anagrelide
CTSL	MCF7	0.00467143	0.589253	0.0867475	0.0867475	0.445886	-0.0333	0.54575	-0.2454	0.352	0.352	0.4538	BRD-K92241597	tosedostat
CTSL	MCF7	0.00471447	0.629355	0.168091	0.168091	0.0250347	-0.0333	-0.69935	-0.2955	-0.3989	-0.3989	-1.1411	BRD-A72066420	mifobate
CTSL	PC3	0.00473224	0.455892	0.680774	0.680774	0.00499125	-0.0109	-0.6229	-0.5138	-0.1336	-0.1336	-1.9548	BRD-K09426783	TAS-103
CTSL	A375	0.00473417	0.0733128	0.00860964	0.010652	0.315225	0.0424	-0.57925	-0.6186	-0.602	-0.57925	-0.6225	BRD-K92758126	MD-920
CTSL	HA1E	0.00473666	0.117707	0.0375647	0.0375647	0.335008	0.0294	0.6031	0.6527	0.5564	0.5564	1.7636	BRD-K82846253	repaglinide
CTSL	HA1E	0.0047397	0.824737	0.294625	0.294625	0.204021	0.0294	-0.5373	0.2014	-0.4402	-0.4402	-0.5373	BRD-K67783091	haloperidol
CTSL	A549	0.00474295	0.282303	0.15209	0.15209	0.0915656	0.02615	0.6745	0.7894	0.60835	0.60835	0.843	BRD-K59317601	MLN-0128
CTSL	HT29	0.00475324	0.912765	0.17446	0.17446	0.506354	-0.0918	0.4526	-0.14355	0.19125	0.19125	0.5266	BRD-A05821830	docetaxel
CTSL	MCF7	0.00481812	0.207738	0.0109187	0.0109187	0.950007	-0.0333	-0.641	-0.5733	-0.7117	-0.7117	0.4059	BRD-K49468759	KIN001-266
CTSL	MCF7	0.00483192	0.0193252	0.00487014	0.00487014	0.585215	-0.0333	0.83	1.1189	0.9734	0.9734	0.8845	BRD-A93964801	clinafloxacin
CTSL	HA1E	0.00484694	0.034124	0.0275736	0.0275736	0.190182	0.0294	0.54815	0.9025	0.7498	0.7498	0.592	BRD-K55591206	epigallocatechin-gallate-(-)
CTSL	HA1E	0.0048651	0.489291	0.0539486	0.0539486	0.0482792	0.0294	0.82345	0.7712	0.8876	0.8876	0.8757	BRD-A07986123	galeterone
CTSL	HEPG2	0.00487735	0.552449	0.322491	0.322491	0.00548763	-0.17825	0.8896	0.0095	0.11695	0.11695	1.8891	BRD-U64521890	XMD-16144
CTSL	HT29	0.004883	0.06717	0.00435687	0.00435687	0.666233	-0.0918	-0.7626	-0.8348	-1.04535	-1.04535	0.5596	BRD-A58048407	nimodipine
CTSL	A375	0.00492298	0.274138	0.0404642	0.0404642	0.0527103	0.0424	0.5501	1.5199	0.6265	0.6265	1.2257	BRD-K25837718	josamycin
CTSL	PC3	0.00493068	0.0109363	0.00950911	0.00950911	0.158158	-0.0109	0.5564	1.3543	0.5706	0.5706	0.7435	BRD-A45498368	WYE-125132
CTSL	A375	0.00493519	0.088003	0.0723321	0.0723321	0.0418229	0.0424	-0.43495	-0.9129	-0.5922	-0.5922	-1.7208	BRD-K68232650	lacosamide
CTSL	MCF7	0.00494072	0.0305193	0.00349978	0.00349978	0.496093	-0.0333	0.6981	1.3139	1.0115	1.0115	0.7202	BRD-K31385749	ivabradine
CTSL	A375	0.0049505	0.39338	0.055987	0.055987	0.28947	0.0424	0.6761	0.6826	0.6826	0.6826	0.9833	BRD-K97884852	malotilate
CTSL	HT29	0.00498765	0.257877	0.00477946	0.00477946	0.311842	-0.0918	0.50875	0.391	0.5404	0.5404	-0.6886	BRD-A14966924	alaproclate
CTSL	HT29	0.00509234	0.470114	0.306074	0.306074	0.0404051	-0.0918	0.3889	0.0438	0.204	0.204	0.59835	BRD-K05804044	AZ-628
CTSL	HEPG2	0.00509345	0.0163694	0.00036456	0.00036456	0.370694	-0.17825	0.63785	1.4133	1.2131	1.2131	-0.8648	BRD-K09951645	dabrafenib
CTSL	A549	0.00515043	0.262638	0.424814	0.424814	0.00218413	0.02615	-0.4953	-0.306	-0.306	-0.306	-1.62585	BRD-A01645196	garcinol
CTSL	A375	0.00515979	0.34036	0.0350299	0.0350299	0.35342	0.0424	0.56095	1.1444	0.8734	0.8734	0.5404	BRD-K85679373	sulbactam
CTSL	A549	0.00517419	0.0913409	0.10408	0.10408	0.36898	0.02615	-0.54435	-0.65575	-0.4197	-0.4197	-0.5294	BRD-K97056771	GNF-2
CTSL	HT29	0.00525276	0.441559	0.514725	0.514725	0.0904936	-0.0918	0.38305	-0.47695	-0.31215	-0.31215	0.66625	BRD-K56343971	vemurafenib
CTSL	A375	0.00534411	0.396102	0.263092	0.263092	0.0726219	0.0424	0.5181	0.3566	0.3566	0.3566	0.8317	BRD-K33453211	levocabastine
CTSL	A375	0.00535069	0.442629	0.470833	0.470833	0.035219	0.0424	-0.5469	0.399	0.0248	0.0248	-1.5196	BRD-A70998768	pinaverium
CTSL	HEPG2	0.00540644	0.231597	0.0131192	0.0131192	0.728757	-0.17825	0.2741	0.4767	0.4767	0.4767	-0.1163	BRD-K42805893	osimertinib
CTSL	HEPG2	0.0054076	0.831819	0.0380768	0.0380768	0.0687713	-0.17825	-0.9666	-0.4236	-0.9402	-0.9402	-1.0613	BRD-K75308783	SAR-245409
CTSL	PC3	0.00544914	0.432683	0.169637	0.169637	0.144766	-0.0109	-0.6795	-0.1121	-0.5597	-0.5597	-1.1699	BRD-K59715032	pasireotide
CTSL	HA1E	0.00549647	0.240901	0.0391256	0.0391256	0.383451	0.0294	-0.5042	-0.9727	-0.4765	-0.4765	-0.6909	BRD-A87130939	masoprocol
CTSL	HCC515	0.00559851	0.00565462	0.207128	0.207128	0.0103348	-0.1524	0.43775	1.2463	0.1139	0.1139	1.0321	BRD-K43389698	BMS-387032
CTSL	HA1E	0.00561264	0.445879	0.0532456	0.0532456	0.27786	0.0294	0.70635	0.2904	0.7576	0.7576	0.5503	BRD-K37720887	SB-525334
CTSL	PC3	0.00564677	NA	0.00564677	0.00564677	NA	-0.0109	2.352	NA	2.352	2.352	NA	BRD-K86787118	bafilomycin a1
CTSL	HA1E	0.0056729	0.528424	0.0344222	0.0344222	0.481901	0.0294	-0.5507	-0.2535	-0.52085	-0.52085	-0.3194	BRD-A90451247	KU-60019
CTSL	PC3	0.00568553	0.99362	0.0402967	0.0402967	0.09568	-0.0109	-0.6321	0.2713	-0.7339	-0.7339	-0.7018	BRD-K49055432	A-66
CTSL	PC3	0.00569616	0.525635	0.687546	0.687546	0.0627342	-0.0109	0.5502	0.2644	0.1364	0.1364	1.012	BRD-K16485616	mocetinostat
CTSL	HT29	0.00571266	NA	NA	NA	NA	-0.0918	-0.1997	NA	NA	NA	NA	BRD-K60230970	MG-132
CTSL	MCF7	0.0057471	0.589253	0.820797	0.820797	0.0270291	-0.0333	0.6013	-0.7224	0.0746	0.0746	1.1392	BRD-K23363278	CYT-997
CTSL	PC3	0.00575826	0.740212	0.543754	0.543754	0.206813	-0.0109	0.53875	-0.0162	0.1384	0.1384	0.59225	BRD-K86797399	SB-939
CTSL	HT29	0.00577655	0.112187	0.0313382	0.0313382	0.103742	-0.0918	0.5115	0.363	0.5604	0.5604	1.1429	BRD-K72827473	CEP-37440
CTSL	HA1E	0.00581236	0.177047	0.00184384	0.00184384	0.513089	0.0294	-0.6159	-0.9905	-0.8952	-0.8952	0.2956	BRD-K32536677	AGK-2
CTSL	HEPG2	0.00583444	0.753126	0.0525586	0.0525586	0.13571	-0.17825	0.40295	0.1011	0.2897	0.2897	0.6597	BRD-U07805514	saracatinib
CTSL	MCF7	0.00585459	0.974812	0.292333	0.292333	0.739904	-0.0333	0.6445	-0.224	0.2095	0.2095	-0.3555	BRD-K56334280	amonafide
CTSL	HEPG2	0.0058923	0.62276	0.14144	0.14144	0.213263	-0.17825	0.5561	0.6126	0.4996	0.4996	1.0536	BRD-K54997624	alpelisib
CTSL	HA1E	0.00592004	0.147801	0.351341	0.351341	0.0253051	0.0294	-0.7472	-0.2466	-0.2466	-0.2466	-0.904	BRD-K99792991	hexachlorophene
CTSL	HEPG2	0.00593529	0.125275	0.00131728	0.00131728	0.784367	-0.17825	0.5595	0.93955	0.6658	0.6658	0.09075	BRD-K68065987	MK-2206
CTSL	HT29	0.0059536	0.399569	0.023226	0.023226	0.302945	-0.0918	0.7005	-0.1109	0.77575	0.77575	0.5184	BRD-K12932420	YM-976
CTSL	A375	0.00596223	0.0485453	0.0142491	0.0142491	0.700885	0.0424	-0.6095	-0.8702	-0.6722	-0.6722	0.1579	BRD-K50387473	XMD-892
CTSL	HA1E	0.0059888	0.427026	0.0142817	0.0142817	0.143982	0.0294	-0.4041	-0.2899	-0.42975	-0.42975	-0.6787	BRD-K57282030	JW-7-24-1
CTSL	A375	0.00601684	0.775526	0.0429576	0.0429576	0.412668	0.0424	-0.47335	0.1417	-0.604	-0.604	-0.2425	BRD-K54770957	etoricoxib
CTSL	A375	0.00602416	0.33542	0.0587266	0.0587266	0.670631	0.0424	-0.55155	-0.0087	-0.2446	-0.2446	-0.5595	BRD-K91601245	mercaptopurine
CTSL	A375	0.00615912	0.167523	0.530802	0.530802	0.0157567	0.0424	-0.6329	-0.7474	0.1575	0.1575	-1.2628	BRD-K03063480	PF-477736
CTSL	HA1E	0.00616702	0.298632	0.0316031	0.0316031	0.309046	0.0294	-0.40205	-0.475	-0.5589	-0.5589	-0.2218	BRD-K16732600	MK-0893
CTSL	HEPG2	0.0062097	0.072967	0.0273529	0.0273529	0.388184	-0.17825	0.51825	0.3605	0.5586	0.5586	-0.0196	BRD-K37720887	SB-525334
CTSL	A375	0.00623606	0.644764	0.291169	0.291169	0.0248956	0.0424	-0.3848	-0.0536	-0.0855	-0.0855	-1.1726	BRD-K38852836	ganetespib
CTSL	HA1E	0.0063227	0.83356	0.525649	0.525649	0.0413639	0.0294	-0.69565	-0.0605	-0.0847	-0.0847	-1.3338	BRD-K86882815	cabergoline
CTSL	HEPG2	0.00641581	0.122172	0.0560284	0.0560284	0.7328	-0.17825	0.41945	0.191	0.191	0.191	0.2294	BRD-K42918627	GSK-2126458
CTSL	MCF7	0.00641706	0.302793	0.0416369	0.0416369	0.573299	-0.0333	0.41435	0.5146	0.5146	0.5146	0.1766	BRD-A18328003	GDC-0980
CTSL	PC3	0.00642344	0.870583	0.129816	0.129816	0.200067	-0.0109	0.51505	-0.2477	0.4676	0.4676	1.7828	BRD-K41783120	STA-5326
CTSL	HA1E	0.00644274	0.480369	0.0467217	0.0467217	0.910271	0.0294	0.72685	0.1804	0.6044	0.6044	0.1986	BRD-A26690767	saquinavir
CTSL	MCF7	0.00646271	0.33441	0.164746	0.164746	0.0956703	-0.0333	0.67545	0.6257	0.6257	0.6257	0.8967	BRD-K55187425	rigosertib
CTSL	HA1E	0.00646502	0.850883	0.855449	0.855449	0.0241691	0.0294	0.6312	0.058	0.058	0.058	1.4184	BRD-K57041787	dabigatran-etexilate
CTSL	A375	0.0064937	0.850764	0.0523174	0.0523174	0.107399	0.0424	0.61005	0.3964	0.6596	0.6596	1.2415	BRD-K08206212	entecavir
CTSL	A375	0.00650924	0.265509	0.0725527	0.156074	0.940107	0.0424	0.5195	0.6252	0.50385	0.3825	0.1741	BRD-K08109215	I-BET-762
CTSL	HT29	0.00651609	0.113985	0.121746	0.121746	0.214566	-0.0918	0.4155	0.5979	0.1687	0.1687	0.7976	BRD-K91822704	torcitabine
CTSL	A375	0.00651724	0.449942	0.262129	0.262129	0.996873	0.0424	0.77795	0.6347	0.7336	0.7336	-0.2612	BRD-K95260951	asenapine
CTSL	HT29	0.0066325	0.738758	0.907177	0.907177	0.0221925	-0.0918	0.58355	0.06685	0.06685	0.06685	2.6067	BRD-K22848513	bardoxolone-methyl
CTSL	HA1E	0.00666079	0.010044	0.00454026	0.00454026	0.65037	0.0294	-0.82045	-1.5022	-0.8916	-0.8916	0.0297	BRD-K84748119	vicriviroc
CTSL	PC3	0.00675107	0.00770641	0.00405941	0.00405941	0.13226	-0.0109	-0.5883	-1.6824	-1.2417	-1.2417	-1.2162	BRD-K93645900	tadalafil
CTSL	HEPG2	0.00680237	0.0407831	0.0580371	0.0580371	0.262295	-0.17825	0.40975	0.4573	0.4573	0.4573	0.1866	BRD-K08109215	I-BET-762
CTSL	A375	0.00687131	0.14671	0.00123689	0.00123689	0.267741	0.0424	-0.57915	-0.7406	-0.8525	-0.8525	-0.3434	BRD-K61452026	emtricitabine
CTSL	HEPG2	0.00689107	0.132914	0.046494	0.046494	0.890953	-0.17825	0.2273	0.7738	0.3571	0.3571	-0.0851	BRD-K99545815	PF-562271
CTSL	HEPG2	0.0069134	0.0429472	0.0377917	0.0377917	0.403136	-0.17825	0.15835	1.3886	0.2199	0.2199	0.0615	BRD-K50387473	XMD-892
CTSL	HA1E	0.00691451	0.0775206	0.447387	0.447387	0.0403932	0.0294	-0.5493	-0.5003	-0.4332	-0.4332	-0.9342	BRD-K03063480	PF-477736
CTSL	HT29	0.00692559	0.28936	0.139389	0.139389	0.20098	-0.0918	0.48125	0.2503	0.41055	0.41055	0.4924	BRD-K12184916	NVP-BEZ235
CTSL	MCF7	0.00694248	0.4633	0.0223582	0.0223582	0.948212	-0.0333	-0.5276	-0.0945	-0.59415	-0.59415	-0.0279	BRD-K19741547	vernakalant
CTSL	HA1E	0.00702848	0.973093	0.361775	0.361775	0.186262	0.0294	0.5411	-0.01325	0.31385	0.31385	0.769	BRD-K85606544	neratinib
CTSL	A549	0.00703217	0.37675	0.138579	0.138579	0.00786583	0.02615	0.441	-1.0242	0.3995	0.3995	1.1829	BRD-K68407802	KIN001-055
CTSL	A375	0.00705054	0.180076	0.0319742	0.0319742	0.360324	0.0424	0.6461	0.8038	0.778	0.778	0.5871	BRD-K43887077	dopamine
CTSL	HT29	0.00709658	0.546335	0.369451	0.369451	0.620209	-0.0918	0.49525	0.1357	0.1357	0.1357	0.1781	BRD-K56614220	clofazimine
CTSL	HA1E	0.00710834	0.176732	0.0356017	0.0356017	0.50866	0.0294	-0.51995	-0.8877	-0.5678	-0.5678	-0.484	BRD-K65182930	NVP-AUY922
CTSL	HA1E	0.00716981	0.393194	0.504577	0.504577	0.0442917	0.0294	-0.4534	0.5335	-0.38325	-0.38325	-0.9968	BRD-A62071884	siguazodan
CTSL	HT29	0.00720443	0.00182183	0.0475377	0.0475377	0.0923703	-0.0918	0.30965	1.2184	0.31675	0.31675	0.70305	BRD-K51313569	palbociclib
CTSL	HCC515	0.00730288	0.321297	0.298945	0.298945	0.614179	-0.1524	0.21545	0.2218	-0.0767	-0.0767	0.0523	BRD-A45498368	WYE-125132
CTSL	HA1E	0.00730684	0.00384841	0.222444	0.222444	0.309764	0.0294	-0.4679	-0.9915	-0.41545	-0.41545	-0.3212	BRD-K08799216	pelitinib
CTSL	HT29	0.0073123	0.375688	0.439336	0.439336	0.152304	-0.0918	0.5991	-0.6301	-0.0316	-0.0316	0.7613	BRD-K69116396	sertindole
CTSL	HA1E	0.00732016	0.039915	0.0222293	0.0222293	0.246073	0.0294	0.47925	1.5653	0.4147	0.4147	0.7372	BRD-K43797669	genistein
CTSL	A375	0.00733816	0.437117	0.0422078	0.0422078	0.162602	0.0424	0.7337	0.935	0.935	0.935	0.6169	BRD-K88366685	trimetazidine
CTSL	HCC515	0.0073509	0.197854	0.0925685	0.0925685	0.443001	-0.1524	-0.6743	-0.6431	-0.6514	-0.6514	-0.5744	BRD-K14109347	LY-2603618
CTSL	A375	0.00743488	0.581832	0.0378591	0.0378591	0.0761225	0.0424	0.5652	0.5507	0.5797	0.5797	1.776	BRD-A03216249	mepivacaine
CTSL	HEPG2	0.00763887	0.753126	0.124755	0.124755	0.329153	-0.17825	0.4396	-0.2233	0.3098	0.3098	0.57	BRD-K73319509	PF-04217903
CTSL	PC3	0.00769009	0.255358	0.117728	0.117728	0.23232	-0.0109	-0.7866	-0.7186	-0.7186	-0.7186	1.1054	BRD-A24396574	celastrol
CTSL	PC3	0.0077087	0.461954	0.0596976	0.0596976	0.368892	-0.0109	0.61655	0.6204	0.734	0.734	0.5802	BRD-K16898998	bevirimat-dimeglumine
CTSL	HA1E	0.00775625	0.912612	0.662379	0.662379	0.0077926	0.0294	-0.7206	-0.0597	-0.0597	-0.0597	-1.4566	BRD-K94288301	letermovir
CTSL	HA1E	0.00782343	0.309984	0.00378831	0.00378831	0.0997304	0.0294	-0.5861	-0.4161	-0.6147	-0.6147	-1.3671	BRD-A67616246	levomequitazine
CTSL	HA1E	0.00784901	0.0189779	0.00253399	0.00253399	0.177047	0.0294	0.87985	1.2084	1.1053	1.1053	1.4021	BRD-K67844266	pevonedistat
CTSL	HCC515	0.00789808	0.557667	0.0145033	0.0145033	0.52502	-0.1524	0.45015	0.0764	0.5256	0.5256	0.4752	BRD-K70511574	HMN-214
CTSL	HA1E	0.00791025	0.433065	0.674771	0.674771	0.0259857	0.0294	-1.0316	-0.477	0.1856	0.1856	-1.94025	BRD-A66419424	ixazomib-citrate
CTSL	HA1E	0.00791652	0.543992	0.206484	0.206484	0.0406841	0.0294	0.43695	0.17365	0.3657	0.3657	0.7187	BRD-K92723993	imatinib
CTSL	HEPG2	0.00793754	0.329153	0.0997679	0.0997679	0.14886	-0.17825	0.36775	-0.0464	-0.0368	-0.0368	0.4112	BRD-A25736793	everolimus
CTSL	HT29	0.00798022	0.186617	0.129985	0.129985	0.123796	-0.0918	0.1883	0.1883	0.1107	0.1107	1.0384	BRD-A07395371	esmolol
CTSL	HT29	0.00799709	0.0383964	0.016995	0.016995	0.535797	-0.0918	0.5641	1.67825	0.77405	0.77405	0.5568	BRD-K35775715	liranaftate
CTSL	HA1E	0.00800061	0.180649	0.344344	0.344344	0.0427423	0.0294	0.5386	0.6067	0.48245	0.48245	1.3815	BRD-K77908580	entinostat
CTSL	PC3	0.00801367	0.0245203	0.482977	0.482977	0.036883	-0.0109	0.6742	1.3293	0.2063	0.2063	1.43615	BRD-K23363278	CYT-997
CTSL	MCF7	0.00807293	0.443199	0.963492	0.963492	0.417621	-0.0333	0.6205	0.3975	0.0009	0.0009	0.5139	BRD-K64925568	AMG-232
CTSL	HA1E	0.00809964	0.204723	0.197828	0.197828	0.528424	0.0294	-0.47175	-1.0861	-0.3144	-0.3144	0.0884	BRD-K21025364	NVP-TAE226
CTSL	HA1E	0.0081767	0.804491	0.438952	0.438952	0.83356	0.0294	-0.35825	0.209	-0.1147	-0.1147	0.0557	BRD-K95435023	PHA-665752
CTSL	MCF7	0.00818904	0.52928	0.159224	0.159224	0.104738	-0.0333	0.3136	-0.0325	0.1326	0.1326	0.6802	BRD-K42191735	buparlisib
CTSL	PC3	0.00819121	0.146425	0.044273	0.044273	0.641382	-0.0109	0.468	0.5792	0.5236	0.5236	0.3386	BRD-A44090213	indoprofen
CTSL	HT29	0.00822135	0.148969	0.0140233	0.0140233	0.706191	-0.0918	0.53015	0.3041	0.5575	0.5575	0.5511	BRD-A18043272	phensuximide
CTSL	A375	0.00824584	0.843857	0.752803	0.752803	0.0576842	0.0424	-0.6431	0.4283	-0.0731	-0.0731	-1.1494	BRD-A64485570	trifluridine
CTSL	HEPG2	0.00824662	0.831819	0.13732	0.13732	0.0317232	-0.17825	0.44925	-0.2297	0.2504	0.2504	0.6632	BRD-K77908580	entinostat
CTSL	MCF7	0.00827238	0.457818	0.51979	0.51979	0.0307628	-0.0333	0.45105	-0.0912	-0.0537	-0.0537	0.9908	BRD-K53665955	MK-5108
CTSL	A375	0.00828473	0.053797	0.0381997	0.0381997	0.909111	0.0424	-0.4759	-0.9483	-0.6836	-0.6836	-0.0359	BRD-A29623586	anisodamine
CTSL	HA1E	0.00838706	0.998429	0.602243	0.602243	0.0941854	0.0294	-0.6192	-0.1957	-0.1957	-0.1957	-1.0064	BRD-A55962179	omeprazole
CTSL	MCF7	0.00839524	0.557621	0.308228	0.308228	0.00427645	-0.0333	0.6497	0.2819	0.2819	0.2819	2.239	BRD-K75024268	lesinurad
CTSL	PC3	0.00841639	0.0288955	0.0550896	0.0550896	0.54538	-0.0109	0.53595	0.9274	0.5146	0.5146	0.3329	BRD-A97479839	piperidolate
CTSL	A375	0.0084618	0.101642	0.0256141	0.0256141	0.331502	0.0424	0.60505	0.6876	0.6876	0.6876	0.4355	BRD-K82603084	ethylenediaminetetraacetic-acid
CTSL	HA1E	0.00849154	0.553173	0.0559581	0.0559581	0.429033	0.0294	-0.5972	-0.2267	-0.9233	-0.9233	-0.3363	BRD-K51033547	tramadol
CTSL	HEPG2	0.00853936	0.15579	0.122875	0.122875	0.0475675	-0.17825	0.53855	0.9536	0.1524	0.1524	0.926	BRD-K83963101	MLN-8054
CTSL	HT29	0.00855921	0.206822	0.103807	0.103807	0.193635	-0.0918	0.5658	0.5819	0.2298	0.2298	1.0594	BRD-K87300616	ursodiol
CTSL	PC3	0.00856368	0.0233983	0.00300302	0.00300302	0.88319	-0.0109	0.39495	1.0848	0.9674	0.9674	0.0159	BRD-K84794093	dideoxyadenosine
CTSL	A375	0.00858172	0.0366921	0.118285	0.118285	0.0970188	0.0424	0.6465	1.2161	0.4794	0.4794	1.2116	BRD-K59433843	ICI-192605
CTSL	PC3	0.00858931	0.0188327	0.000791395	0.000791395	0.197274	-0.0109	-0.75195	-1.1861	-1.1861	-1.1861	0.4028	BRD-K32164935	tolazamide
CTSL	PC3	0.00863046	0.916417	0.018656	0.018656	0.876488	-0.0109	0.6598	0.1065	0.6652	0.6652	-0.4376	BRD-K97564742	mepyramine
CTSL	MCF7	0.00865099	0.107336	0.815652	0.815652	0.737181	-0.0333	1.3036	-0.8109	0.06815	0.06815	-0.1124	BRD-K13646352	midostaurin
CTSL	HEPG2	0.00873046	0.0971911	0.0810679	0.0810679	0.0519465	-0.17825	-1.03815	-1.024	-0.7991	-0.7991	-1.1438	BRD-K19477839	SGX523
CTSL	HA1E	0.00899976	0.0195614	0.0250043	0.0250043	0.186262	0.0294	-0.25555	-0.7446	-0.5777	-0.5777	-0.1835	BRD-K93123848	RAF-265
CTSL	HEPG2	0.00901008	0.676918	0.22678	0.22678	0.0929316	-0.17825	0.43505	0.1192	0.3831	0.3831	0.7963	BRD-K52911425	GDC-0941
CTSL	PC3	0.00908102	0.1721	0.201855	0.201855	0.177259	-0.0109	0.4674	1.1545	0.0737	0.0737	0.4674	BRD-K12184916	NVP-BEZ235
CTSL	MCF7	0.00913298	0.140707	0.0350615	0.0350615	0.366514	-0.0333	-0.4895	-0.7855	-0.6819	-0.6819	-0.3707	BRD-K01577834	adenosine
CTSL	HA1E	0.00914884	0.108127	0.00365959	0.00365959	0.458906	0.0294	0.6745	0.9715	0.9715	0.9715	0.4413	BRD-A10039652	tipranavir
CTSL	HT29	0.0092007	0.0318044	0.0116083	0.0116083	0.556901	-0.0918	0.4173	1.5259	0.7055	0.7055	0.3536	BRD-K70592483	phenylacetylglutamine
CTSL	HCC515	0.0092204	0.133254	0.626684	0.626684	0.151105	-0.1524	0.42325	0.5281	0.125	0.125	0.3184	BRD-K70401845	erlotinib
CTSL	HT29	0.00935174	0.184974	0.0355737	0.0355737	0.589865	-0.0918	0.7338	0.294	0.4	0.4	0.7338	BRD-A06916187	CPI-613
CTSL	MCF7	0.00937227	0.119563	0.052114	0.052114	0.124683	-0.0333	-0.64305	-0.9264	-0.5825	-0.5825	-1.2123	BRD-K51575138	TPCA-1
CTSL	MCF7	0.00941242	0.118815	0.912196	0.912196	0.0358758	-0.0333	1.1048	-0.6885	-0.312	-0.312	1.4297	BRD-K52233191	R-547
CTSL	PC3	0.00945204	0.0778804	0.025985	0.025985	0.390853	-0.0109	-0.563	-1.0504	-0.945	-0.945	-0.6353	BRD-K14704277	cinoxacin
CTSL	A375	0.00948654	0.60249	0.0249679	0.0249679	0.318022	0.0424	0.63945	-0.0397	0.7084	0.7084	0.5773	BRD-K63861289	molsidomine
CTSL	PC3	0.00949124	0.194854	0.0368365	0.0368365	0.653593	-0.0109	0.6336	0.2526	0.3819	0.3819	0.7989	BRD-K59273480	propentofylline
CTSL	A375	0.00951959	0.340856	0.0788846	0.0788846	0.774775	0.0424	-0.8133	-0.0429	-0.4476	-0.4476	0.5428	BRD-K37590257	GSK-256066
CTSL	A375	0.00960265	0.859992	0.121445	0.121445	0.178648	0.0424	0.82885	0.3854	0.8553	0.8553	0.5685	BRD-A52660433	tetrindole
CTSL	HT29	0.00960352	0.452957	0.19824	0.19824	0.0256989	-0.0918	0.51625	0.2723	0.2723	0.2723	1.4627	BRD-K50140147	NVP-TAE684
CTSL	A375	0.00964738	0.304445	0.685648	0.685648	0.0395138	0.0424	-0.231	0.4143	-0.0846	-0.0846	-1.7351	BRD-K22848513	bardoxolone-methyl
CTSL	MCF7	0.00968233	0.27344	0.890575	0.890575	0.0470814	-0.0333	0.7798	1.1679	-0.3924	-0.3924	1.5749	BRD-K16485616	mocetinostat
CTSL	PC3	0.00969171	0.999512	0.525134	0.525134	0.0262907	-0.0109	-0.4637	0.00575	-0.39345	-0.39345	-2.1565	BRD-K34022604	clofarabine
CTSL	HT29	0.0097049	0.105645	0.0113643	0.0113643	0.796861	-0.0918	0.5055	0.5066	0.7294	0.7294	-0.1251	BRD-K03601870	ixabepilone
CTSL	A549	0.00978678	0.155108	0.101231	0.101231	0.0889755	0.02615	-0.3826	-0.6256	-0.5227	-0.5227	-0.52815	BRD-K30632436	CTB
CTSL	MCF7	0.00984887	0.0274324	0.0108538	0.0104403	0.207688	-0.0333	0.6468	1.09805	1.0049	1.0203	0.9138	BRD-K54606188	JQ1-(+)
CTSL	HT29	0.00985876	0.778992	0.774465	0.774465	0.0460902	-0.0918	0.44915	-0.4429	0.3198	0.3198	1.2536	BRD-K42098891	protriptyline
CTSL	HCC515	0.00988996	0.0156716	0.00469285	0.00469285	0.430081	-0.1524	0.39975	1.3122	0.7235	0.7235	0.0005	BRD-K54256913	MK-1775
CTSL	A375	0.00991276	0.848845	0.0205019	0.0205019	0.346348	0.0424	0.67825	-0.2546	0.9922	0.9922	0.5473	BRD-K76197012	ulipristal
CTSL	PC3	0.0099303	0.0849733	0.0763316	0.0763316	0.543295	-0.0109	0.50195	0.9768	0.9768	0.9768	0.4524	BRD-K80700417	SGI-1776
CTSL	HT29	0.0100321	0.010929	0.00496515	0.00496515	0.297642	-0.0918	0.7122	1.8484	0.7483	0.7483	1.2572	BRD-K22024824	RG-4733
CTSL	HEPG2	0.010058	0.815082	0.557445	0.557445	0.0197703	-0.17825	0.4268	0.0634	0.0634	0.0634	0.8483	BRD-K44227013	ponatinib
CTSL	MCF7	0.0101917	0.403767	0.0571869	0.0571869	0.131236	-0.0333	0.3348	0.3014	0.3014	0.3014	0.8455	BRD-K92093830	doxorubicin
CTSL	MCF7	0.0102256	0.41581	0.234928	0.234928	0.0562767	-0.0333	-0.83325	-0.3479	-0.3479	-0.3479	-0.8157	BRD-K26011976	licochalcone-a
CTSL	PC3	0.0102281	0.0701261	0.00298618	0.00298618	0.703344	-0.0109	-0.5166	-1.0363	-1.0363	-1.0363	0.1445	BRD-K42728290	NVP-BGJ398
CTSL	A375	0.010283	0.010283	NA	0.010283	0.010283	0.0424	-1.0574	-1.0574	NA	-1.0574	-1.0574	BRD-K17953061	staurosporine
CTSL	A375	0.0102945	0.57829	0.0240348	0.0240348	0.795404	0.0424	0.4897	0.2381	0.5693	0.5693	0	BRD-K51313569	palbociclib
CTSL	HA1E	0.0103821	0.661749	0.0362581	0.0362581	0.0475025	0.0294	0.77625	0.1975	0.8163	0.8163	0.9756	BRD-K41434598	ORG-9768
CTSL	HCC515	0.0104038	0.00924716	0.322913	0.322913	0.368843	-0.1524	0.32145	1.2842	0.1489	0.1489	0.2523	BRD-K68174511	torin-2
CTSL	A375	0.0104216	0.932061	0.0280617	0.0280617	0.663504	0.0424	-0.51505	0.4133	-0.6732	-0.6732	-0.2698	BRD-K55966568	orantinib
CTSL	HT29	0.0104236	0.0132941	0.00517555	0.00517555	0.528087	-0.0918	0.49995	1.1162	1.0059	1.0059	0.1097	BRD-A31159102	fluoxetine
CTSL	PC3	0.010541	0.665898	0.132167	0.132167	0.490411	-0.0109	-0.6511	-0.6511	-0.6511	-0.6511	-0.3959	BRD-K88789588	letrozole
CTSL	HA1E	0.0105576	0.228119	0.113721	0.113721	0.0391601	0.0294	0.61635	0.6476	0.6476	0.6476	1.3267	BRD-K26701552	tegobuvir
CTSL	HT29	0.0105753	0.0260944	0.0203746	0.0203746	0.346093	-0.0918	0.41685	1.1901	0.6586	0.6586	-0.081	BRD-K84011460	nizofenone
CTSL	HA1E	0.0106308	0.314698	0.105356	0.105356	0.657472	0.0294	-0.47765	-0.9213	-0.3343	-0.3343	-0.0277	BRD-K76964878	EX-527
CTSL	A375	0.0106882	0.0938068	0.0923863	0.0923863	0.0493328	0.0424	0.5115	2.098	0.42205	0.42205	0.7453	BRD-K24859147	KIN001-242
CTSL	HA1E	0.0107028	0.798404	0.284931	0.284931	0.36676	0.0294	0.7679	0.4335	0.7497	0.7497	0.7679	BRD-K74371986	NSI-189
CTSL	HA1E	0.0107043	0.0499796	0.272965	0.272965	0.180546	0.0294	-0.6089	-0.8342	-0.4538	-0.4538	-0.6255	BRD-K29395450	PIK-93
CTSL	HT29	0.0107228	0.0889265	0.317291	0.317291	0.573607	-0.0918	0.5196	0.602	0.5577	0.5577	0.3424	BRD-K75295174	alisertib
CTSL	PC3	0.0107327	0.118001	0.553627	0.553627	0.52238	-0.0109	0.869	0.869	0.2558	0.2558	0.8014	BRD-K42918627	GSK-2126458
CTSL	HA1E	0.0107408	0.536827	0.0219653	0.0219653	0.935674	0.0294	0.6747	-0.5062	0.7483	0.7483	-0.0947	BRD-K31092604	donitriptan
CTSL	PC3	0.0107978	0.132424	0.373419	0.373419	0.0193894	-0.0109	-0.3031	-0.6366	-0.11255	-0.11255	-0.9066	BRD-K09132007	D-4476
CTSL	PC3	0.0109198	0.687832	0.0289772	0.0289772	0.226127	-0.0109	0.47905	0.2682	0.8081	0.8081	0.2282	BRD-K68392338	ZK-93426
CTSL	PC3	0.010958	0.903739	0.258021	0.258021	0.570907	-0.0109	0.69655	0.0802	0.3174	0.3174	0.6873	BRD-K73237276	tacalcitol
CTSL	HT29	0.0109601	0.295585	0.0902864	0.0902864	0.451768	-0.0918	0.33035	0.1983	0.1983	0.1983	-0.0572	BRD-K34008116	dolasetron
CTSL	A375	0.0110035	0.783796	0.267576	0.267576	0.0408473	0.0424	-0.72425	0.0592	0.0592	0.0592	-1.1482	BRD-K81332461	maxacalcitol
CTSL	MCF7	0.0110044	0.0319695	0.00390199	0.00390199	0.55218	-0.0333	0.603	1.1716	0.9654	0.9654	0.3346	BRD-A75479906	rimantadine
CTSL	HT29	0.011036	0.604607	0.0773563	0.0773563	0.343067	-0.0918	0.5159	-0.1415	0.6444	0.6444	0.274	BRD-K30685142	levothyroxine
CTSL	PC3	0.0110733	0.293041	0.12184	0.12184	0.267238	-0.0109	0.54965	0.7207	0.4718	0.4718	0.9012	BRD-A63236097	andrographolide
CTSL	A375	0.0110917	0.20814	0.00611455	0.00611455	0.0370463	0.0424	0.7164	0.7098	0.723	0.723	0.9883	BRD-K41996876	tyrphostin-1
CTSL	HA1E	0.0111344	0.796124	0.490459	0.490459	0.509923	0.0294	-0.5072	-0.1214	-0.173	-0.173	-0.6233	BRD-K68488863	ENMD-2076
CTSL	HEPG2	0.0112246	0.330776	0.36237	0.36237	0.101605	-0.17825	0.3232	0.45445	-0.0581	-0.0581	0.3232	BRD-K94012289	OSI-027
CTSL	A549	0.0112257	0.781117	0.0759151	0.0759151	0.304901	0.02615	-0.4566	0.0032	-0.26765	-0.26765	-0.4608	BRD-K37764012	PF-03758309
CTSL	MCF7	0.0112351	0.54521	0.299298	0.299298	0.00355908	-0.0333	0.52635	-0.32635	0.3207	0.3207	0.7997	BRD-A87137733	GSK-690693
CTSL	PC3	0.0112483	0.0388315	0.0158039	0.0158039	0.681223	-0.0109	0.58285	0.8515	0.6347	0.6347	0.5931	BRD-A29289453	PCA-4248
CTSL	PC3	0.0114516	0.0860774	0.710132	0.710132	0.485604	-0.0109	0.8663	2.8787	0.25205	0.25205	0.35505	BRD-A38076815	glafenine
CTSL	A375	0.0114572	0.314709	0.312455	0.312455	0.0283749	0.0424	0.77145	0.8609	0.4375	0.4375	1.1581	BRD-K38197229	bumetanide
CTSL	A375	0.0115685	0.068507	0.0195266	0.0195266	0.488436	0.0424	0.6889	0.8009	0.70295	0.70295	0.4892	BRD-K28731095	calcitriol
CTSL	HT29	0.0115871	0.249249	0.0578315	0.0578315	0.939743	-0.0918	0.53065	0.9307	0.4528	0.4528	-0.0299	BRD-K44844162	taselisib
CTSL	HEPG2	0.0116215	0.131532	0.0237051	0.0237051	0.308283	-0.17825	0.55235	1.7066	0.6831	0.6831	0.5824	BRD-K07859598	GW-5074
CTSL	HA1E	0.0116697	0.289799	0.0497785	0.0497785	0.168674	0.0294	0.5561	0.7018	0.6522	0.6522	0.6986	BRD-K36324071	NF-449
CTSL	HT29	0.0117002	0.136323	0.0973174	0.0973174	0.402339	-0.0918	0.51035	1.6449	0.4589	0.4589	0.9789	BRD-K31627533	rimexolone
CTSL	A375	0.01172	0.185224	0.266723	0.266723	0.0461923	0.0424	-1.0078	-1.479	0.0677	0.0677	-1.1333	BRD-A78341343	regadenoson
CTSL	HCC515	0.0117937	0.143458	0.379587	0.379587	0.0672254	-0.1524	0.321	0.3716	0.1063	0.1063	0.6023	BRD-U60236422	WH-4-025
CTSL	MCF7	0.0118063	0.728015	0.0708911	0.0708911	0.781125	-0.0333	0.6952	-0.472	0.6952	0.6952	0.0185	BRD-A17462676	bambuterol
CTSL	HT29	0.0118683	0.572934	0.810685	0.810685	0.0880948	-0.0918	0.65905	0.0273	-0.2609	-0.2609	0.8481	BRD-U60236422	WH-4-025
CTSL	MCF7	0.0118699	0.209041	0.0761121	0.0761121	0.00768606	-0.0333	0.2034	0.1935	0.1844	0.1844	1.05525	BRD-K42918627	GSK-2126458
CTSL	MCF7	0.0118713	0.0395289	0.142434	0.142434	0.367952	-0.0333	0.51715	1.4506	0.9949	0.9949	0.3508	BRD-K44309363	dexniguldipine
CTSL	HT29	0.0120249	0.135028	0.00948006	0.00948006	0.87866	-0.0918	-0.57835	-0.6446	-0.6446	-0.6446	-0.5914	BRD-K62363391	dapsone
CTSL	HEPG2	0.0120901	0.432703	0.8001	0.8001	0.296062	-0.17825	0.0691	0.0871	-0.1691	-0.1691	0.0691	BRD-K02708799	GSK-1059615
CTSL	A375	0.0121143	0.224309	0.550851	0.736088	4.83431e-05	0.0424	-0.509	-0.6758	0.35035	0.1791	-1.3019	BRD-K12184916	NVP-BEZ235
CTSL	HT29	0.0121211	0.0326095	0.00480072	0.00480072	0.399016	-0.0918	0.52445	0.97	0.5652	0.5652	0.8719	BRD-K56104152	oxiconazole
CTSL	PC3	0.0121258	0.313216	0.0308039	0.0308039	0.655758	-0.0109	-0.6539	-0.9762	-0.9762	-0.9762	0.1306	BRD-K85402309	dovitinib
CTSL	A375	0.0121411	0.0282337	0.103262	0.103262	0.410994	0.0424	-0.447	-1.3233	-0.3718	-0.3718	-0.5984	BRD-K70642949	GSK-2334470
CTSL	A375	0.0122479	0.35139	0.0153469	0.0153469	0.46238	0.0424	0.74075	0.6882	0.7555	0.7555	0.7689	BRD-K45117373	Y-26763
CTSL	MCF7	0.0122983	0.435725	0.627841	0.627841	0.0138556	-0.0333	0.81815	-0.4189	-0.4189	-0.4189	1.4275	BRD-K76694128	rebastinib
CTSL	A375	0.0124565	0.205146	0.368161	0.368161	0.0384004	0.0424	0.71855	-0.7376	0.5066	0.5066	1.0716	BRD-K02079473	oxatomide
CTSL	HT29	0.0124829	0.296498	0.12037	0.12037	0.0272439	-0.0918	0.7003	0.4508	0.57975	0.57975	1.4569	BRD-K00259736	colchicine
CTSL	HT29	0.0124844	0.0475105	0.0839759	0.0839759	0.019622	-0.0918	0.7802	0.8583	0.7595	0.7595	1.1437	BRD-K71106091	fludarabine-phosphate
CTSL	MCF7	0.0124974	0.0617215	0.15882	0.15882	0.0609712	-0.0333	0.60275	0.6126	0.5929	0.5929	0.7992	BRD-K66412701	pazufloxacin
CTSL	A375	0.0124981	0.124415	0.0417235	0.0417235	0.719198	0.0424	0.5452	1.3181	0.8468	0.8468	0.2176	BRD-A07986123	galeterone
CTSL	PC3	0.0125457	0.795864	0.347469	0.347469	0.330839	-0.0109	0.3873	0.3147	0.3333	0.3333	0.2436	BRD-K02708799	GSK-1059615
CTSL	HCC515	0.0125546	0.0609303	0.0250023	0.0250023	0.0510911	-0.1524	0.4774	0.6645	0.57535	0.57535	0.4969	BRD-K66989831	anacardic-acid
CTSL	HT29	0.0126073	0.7328	0.0172421	0.0172421	0.684287	-0.0918	0.6235	-0.222	1.05785	1.05785	-0.1149	BRD-K06878038	deferiprone
CTSL	MCF7	0.0126078	0.926685	0.239895	0.239895	0.0641478	-0.0333	0.4916	-0.6517	0.4674	0.4674	0.5662	BRD-A53566267	anecortave-acetate
CTSL	MCF7	0.012689	0.0122386	0.120206	0.120206	0.0555819	-0.0333	0.607	1.3819	0.2747	0.2747	0.9416	BRD-K64785675	TG-100115
CTSL	HA1E	0.012733	0.487129	0.11411	0.11411	0.435959	0.0294	-0.4468	-0.1894	-0.349	-0.349	-0.278	BRD-K59184148	SB-216763
CTSL	MCF7	0.0127454	0.139495	0.0170751	0.0170751	0.370839	-0.0333	-0.4927	-0.8092	-0.5135	-0.5135	-0.3346	BRD-A15297126	fluocinolone-acetonide
CTSL	HT29	0.0127487	0.239047	0.0869799	0.0869799	0.164583	-0.0918	0.3958	0.2623	0.434	0.434	0.7448	BRD-K90868879	canagliflozin
CTSL	MCF7	0.0127773	0.0973083	0.0695703	0.0695703	0.132146	-0.0333	0.31185	0.63945	0.2757	0.2757	0.65905	BRD-K20696416	NVP-AEW541
CTSL	A375	0.0128255	0.12855	0.0160532	0.0160532	0.227713	0.0424	0.72645	1.4456	0.8531	0.8531	1.2046	BRD-K59331299	voglibose
CTSL	HA1E	0.0128482	0.0298001	0.0173903	0.0173903	0.725674	0.0294	0.6399	1.1734	1.1734	1.1734	0.4168	BRD-A69275535	pinitol
CTSL	HA1E	0.0129109	0.120682	0.0856353	0.0856353	0.345126	0.0294	-0.37265	-0.44425	-0.37265	-0.37265	-0.2903	BRD-K28392481	AZD-4547
CTSL	MCF7	0.0129309	0.541375	0.791603	0.791603	0.333282	-0.0333	0.5537	-0.6569	0.0771	0.0771	0.3446	BRD-K50000283	PHA-767491
CTSL	HT29	0.0130326	0.375688	0.00665599	0.00665599	0.944461	-0.0918	0.497	0.7198	1.5442	1.5442	0.0909	BRD-K76953762	indoramin
CTSL	HT29	0.0130547	0.0714092	0.0211909	0.0211909	0.657277	-0.0918	0.3661	0.4713	0.4388	0.4388	-0.0571	BRD-K38287497	narlaprevir
CTSL	A375	0.013072	0.219879	0.857431	0.857431	0.931282	0.0424	-1.28065	0.8629	-0.0116	-0.0116	0.4656	BRD-K49350383	thioguanine
CTSL	A375	0.0131159	0.866926	0.226904	0.226904	0.0643028	0.0424	-0.32445	0.1135	-0.1301	-0.1301	-0.9552	BRD-K52172416	anastrozole
CTSL	HT29	0.0131804	0.755975	0.0261512	0.0261512	0.40345	-0.0918	0.67315	-0.3848	0.6745	0.6745	0.2811	BRD-K09078998	deforolimus
CTSL	HA1E	0.013244	0.0993258	0.358127	0.358127	0.0971243	0.0294	0.5761	0.7938	0.1102	0.1102	0.5365	BRD-K16478699	PLX-4720
CTSL	HA1E	0.0132514	0.0524442	0.180625	0.180625	0.50866	0.0294	-0.30485	-1.1187	-0.1503	-0.1503	-0.1711	BRD-K23228615	GDC-0980
CTSL	MCF7	0.0133845	0.856112	0.0342415	0.0342415	0.483899	-0.0333	0.8457	0.1152	0.9355	0.9355	0.1283	BRD-K22482860	dalfampridine
CTSL	PC3	0.0134101	0.0336752	0.0190497	0.0190497	0.686361	-0.0109	0.50335	1.4455	0.783	0.783	0.2332	BRD-A30815329	felodipine
CTSL	MCF7	0.0134534	0.436788	0.490709	0.490709	0.0223616	-0.0333	0.4985	0.1879	-0.0517	-0.0517	2.2293	BRD-K96123349	brequinar
CTSL	A375	0.01347	0.269862	0.327713	0.327713	0.109691	0.0424	-0.6914	-0.3255	-0.3255	-0.3255	-0.8548	BRD-K65781196	avanafil
CTSL	A375	0.0135398	0.0152552	0.0828621	0.0828621	0.145622	0.0424	-0.6891	-1.2463	-0.5886	-0.5886	-1.2751	BRD-K03390685	cobimetinib
CTSL	HEPG2	0.013607	0.749046	0.0826904	0.0826904	0.873981	-0.17825	-0.8706	-0.3056	-0.9339	-0.9339	-0.4018	BRD-K08799216	pelitinib
CTSL	HEPG2	0.013607	0.196001	0.245032	0.245032	0.469601	-0.17825	0.2323	0.2859	0.231	0.231	0.0525	BRD-K40738845	BMS-777607
CTSL	MCF7	0.0136594	0.686105	0.0200797	0.0200797	0.805864	-0.0333	0.3047	0.2406	0.3786	0.3786	-0.0092	BRD-K04887706	AKT-inhibitor-1-2
CTSL	MCF7	0.013662	0.184502	0.0443964	0.0443964	0.397447	-0.0333	-0.59505	-1.0898	-0.541	-0.541	0.1442	BRD-A94276798	talinolol
CTSL	PC3	0.0137182	0.0190869	0.0173265	0.0173265	0.298581	-0.0109	0.58815	1.4252	0.7018	0.7018	0.3146	BRD-K34008116	dolasetron
CTSL	A375	0.0137218	0.214051	0.0598187	0.0598187	0.500282	0.0424	-0.4593	-0.4095	-0.55735	-0.55735	-0.31185	BRD-K21718444	KW-2449
CTSL	MCF7	0.0137345	0.0996603	0.217032	0.217032	0.395454	-0.0333	0.34175	0.4039	0.3316	0.3316	-0.08265	BRD-K52911425	GDC-0941
CTSL	A375	0.0137557	0.0957482	0.0230535	0.0230535	NA	0.0424	0.8617	2.2113	0.9423	0.9423	NA	BRD-K15179879	carfilzomib
CTSL	A549	0.0137644	0.0586949	0.00154599	0.00154599	0.500852	0.02615	-0.86725	-1.181	-1.2889	-1.2889	0.2405	BRD-K04887706	AKT-inhibitor-1-2
CTSL	HT29	0.0137849	0.438223	0.24113	0.24113	0.0501136	-0.0918	0.4179	0.2868	0.24725	0.24725	0.8532	BRD-K62676709	guanethidine
CTSL	A375	0.013806	0.0329831	0.271127	0.271127	0.0402712	0.0424	-0.57085	-0.8227	-0.5921	-0.5921	-0.8872	BRD-K03194791	roflumilast
CTSL	HEPG2	0.0138543	0.203542	0.068063	0.068063	0.736851	-0.17825	0.46335	0.2001	0.5726	0.5726	0.1475	BRD-K13094524	PFI-1
CTSL	MCF7	0.0138556	NA	NA	NA	NA	-0.0333	-1.4574	NA	NA	NA	NA	BRD-K64634304	tretinoin
CTSL	MCF7	0.0139161	0.035087	0.320485	0.320485	0.112858	-0.0333	-0.4032	-1.2408	-0.2213	-0.2213	-0.4533	BRD-M89827113	levcromakalim
CTSL	HA1E	0.0139174	0.432199	0.884058	0.884058	0.0375056	0.0294	0.4991	0.5592	0.0129	0.0129	1.2189	BRD-A60245366	AS-601245
CTSL	HA1E	0.0139276	0.230024	0.11243	0.11243	0.12027	0.0294	0.62655	0.6399	0.6374	0.6374	0.6605	BRD-K95773607	darifenacin
CTSL	A375	0.0139458	0.715968	0.300608	0.300608	0.551074	0.0424	-0.41355	-0.22105	-0.0472	-0.0472	0.39465	BRD-K88378636	withaferin-a
CTSL	HEPG2	0.0140214	0.257745	0.0324603	0.0324603	0.260013	-0.17825	-0.64745	-0.6516	-0.8998	-0.8998	-0.6433	BRD-K99964838	bosutinib
CTSL	MCF7	0.0140303	0.360323	0.327631	0.327631	0.370839	-0.0333	0.55825	0.7438	0.2709	0.2709	0.043	BRD-K73999723	telmisartan
CTSL	HA1E	0.0141664	0.309128	0.0921689	0.0921689	0.685823	0.0294	0.4584	0.72195	0.45025	0.45025	0.2272	BRD-K26325692	API-001
CTSL	HT29	0.0142563	0.743237	0.455998	0.455998	0.29856	-0.0918	0.41495	-0.2079	-0.0365	-0.0365	0.4233	BRD-U22633929	XMD11-85H
CTSL	HA1E	0.014281	0.633454	0.051726	0.051726	0.399497	0.0294	0.52735	-0.3125	0.5601	0.5601	0.5871	BRD-K28912512	nicotinamide
CTSL	HA1E	0.0143025	0.233482	0.462138	0.462138	0.0512582	0.0294	0.7488	0.7488	0.26245	0.26245	0.8476	BRD-K23190681	AV-412
CTSL	PC3	0.0143678	0.547151	0.340458	0.340458	0.0504385	-0.0109	0.4083	-0.0282	0.2389	0.2389	-0.6583	BRD-K72414522	AZD-5438
CTSL	HT29	0.0143688	0.207534	0.4135	0.4135	0.120928	-0.0918	0.6536	0.4913	0.4913	0.4913	1.2807	BRD-K93869735	taltirelin
CTSL	HT29	0.0144572	0.20789	0.0846418	0.0846418	0.109752	-0.0918	-0.75875	-0.8918	-0.8918	-0.8918	-1.6379	BRD-A02710418	meptazinol
CTSL	PC3	0.0144997	0.92594	0.370412	0.370412	0.0611976	-0.0109	-0.46205	-0.09	-0.4419	-0.4419	-1.1574	BRD-K18194590	mephentermine
CTSL	HT29	0.0145137	0.0455535	0.578023	0.578023	0.634928	-0.0918	-0.49375	-1.2734	-0.4598	-0.4598	-0.1716	BRD-K78659596	ixazomib
CTSL	HA1E	0.0145613	0.10343	0.00812717	0.00812717	0.706928	0.0294	-0.5512	-0.5011	-0.6013	-0.6013	-0.293	BRD-K44771174	ibutamoren
CTSL	HA1E	0.0146215	0.747939	0.323956	0.323956	0.0488405	0.0294	0.3989	0.072	0.3193	0.3193	1.1909	BRD-K09991945	GSK-3-inhibitor-II
CTSL	A375	0.0146324	0.169492	0.0487864	0.0487864	0.194492	0.0424	-0.4873	-0.5695	-0.5695	-0.5695	-0.4873	BRD-K35169477	taranabant
CTSL	PC3	0.0146788	0.543231	0.0169658	0.0169658	0.8982	-0.0109	0.62975	0.35705	0.6723	0.6723	-0.0089	BRD-A45153512	bimatoprost
CTSL	HT29	0.0146836	0.512059	0.534375	0.534375	0.172805	-0.0918	0.38395	0.3008	0.0768	0.0768	0.39555	BRD-K03449891	foretinib
CTSL	A375	0.0146974	0.0407026	0.0138952	0.0138952	0.750871	0.0424	0.6231	1.0999	1.0999	1.0999	0.2102	BRD-K74717603	etravirine
CTSL	A375	0.0147859	0.935177	0.179146	0.179146	0.0325826	0.0424	-0.59335	0.3774	-0.3832	-0.3832	-0.8497	BRD-K59325863	delanzomib
CTSL	PC3	0.0147965	0.695572	0.00766766	0.00766766	0.276835	-0.0109	-0.64585	0.1818	-1.137	-1.137	-0.7208	BRD-K89561498	SN-38
CTSL	HT29	0.014865	0.877491	0.69385	0.69385	0.0410539	-0.0918	0.5893	-0.5099	-0.4828	-0.4828	0.87	BRD-K64857848	XMD-885
CTSL	MCF7	0.0148755	0.566868	0.0813374	0.32149	0.698577	-0.0333	0.3178	-0.1156	-0.6543	-0.1156	0.2128	BRD-K81418486	vorinostat
CTSL	MCF7	0.0149063	0.0162903	0.0261064	0.0261064	0.541673	-0.0333	0.4447	1.3666	0.9352	0.9352	0.3636	BRD-K69726595	mericitabine
CTSL	MCF7	0.0149518	0.979848	0.723959	0.723959	0.223276	-0.0333	0.7749	0.1092	-0.0957	-0.0957	1.051	BRD-K84163249	ercalcitriol
CTSL	A375	0.0151327	0.811789	0.102845	0.102845	0.343595	0.0424	-0.7376	-0.0377	-0.5586	-0.5586	-0.0899	BRD-A67479912	progesterone
CTSL	HT29	0.0151467	0.237866	0.0761225	0.0761225	0.0379458	-0.0918	-0.8629	-2.2748	-0.757	-0.757	-2.3757	BRD-K76674262	homoharringtonine
CTSL	HEPG2	0.0151516	0.785999	0.937409	0.937409	0.153453	-0.17825	0.589	-0.5834	-0.5834	-0.5834	0.7653	BRD-A13021932	BMS-509744
CTSL	HCC515	0.0151673	0.0187371	0.233079	0.233079	0.557667	-0.1524	0.6058	0.927	0.5771	0.5771	-0.0025	BRD-K77908580	entinostat
CTSL	PC3	0.0151912	NA	NA	NA	NA	-0.0109	1.58	NA	NA	NA	NA	BRD-K26863634	BIX-01338
CTSL	HA1E	0.015195	0.0241073	0.0385895	0.0385895	0.733441	0.0294	0.3482	1.5109	0.6206	0.6206	0.1387	BRD-K09471561	levofloxacin
CTSL	HT29	0.0152239	0.857665	0.614356	0.614356	0.274227	-0.0918	0.65755	-0.432	0.0301	0.0301	0.7534	BRD-K89162000	tandutinib
CTSL	HCC515	0.0152592	0.140483	0.553118	0.553118	0.960668	-0.1524	0.393	0.451	-0.1014	-0.1014	0.2062	BRD-K19220233	JNK-9L
CTSL	HA1E	0.0154229	0.0336687	0.12706	0.12706	0.0306251	0.0294	-0.6593	-1.0718	-0.6591	-0.6591	-0.9254	BRD-K36363294	I-BET-151
CTSL	PC3	0.0154235	0.150212	0.183182	0.183182	0.504985	-0.0109	0.49955	0.5553	0.1981	0.1981	1.1369	BRD-K64931368	aminocaproic-acid
CTSL	PC3	0.0154667	0.0876091	0.240277	0.240277	0.0779647	-0.0109	-0.63745	-0.6614	-0.4801	-0.4801	-0.9121	BRD-K28428262	brivanib
CTSL	MCF7	0.0154878	0.543728	0.0202844	0.0202844	0.186665	-0.0333	0.3554	0.3096	0.3903	0.3903	0.50045	BRD-K36740062	GSK-1070916
CTSL	A549	0.0155242	0.00304477	0.0191084	0.0191084	0.483406	0.02615	0.64255	1.2924	0.9647	0.9647	0.1646	BRD-K74065929	doramapimod
CTSL	HA1E	0.0156108	0.609817	0.530472	0.530472	0.170816	0.0294	-0.40065	0.1142	0.1142	0.1142	-0.3802	BRD-K31627533	rimexolone
CTSL	MCF7	0.0156399	0.525956	0.00515739	0.00515739	0.644163	-0.0333	-0.81185	-0.8544	-0.8544	-0.8544	-0.7115	BRD-K19761926	eplerenone
CTSL	HT29	0.015671	0.966502	0.0202515	0.0202515	0.661674	-0.0918	0.3356	-0.0361	0.717	0.717	0.2288	BRD-A38076815	glafenine
CTSL	A549	0.0156844	0.487659	0.966495	0.966495	0.505012	0.02615	0.5242	0.18925	-0.10525	-0.10525	0.0932	BRD-K86856088	UNC-0638
CTSL	PC3	0.0157105	0.440343	0.125565	0.125565	0.0659032	-0.0109	0.7452	0.7006	0.7898	0.7898	1.0876	BRD-K68174511	torin-2
CTSL	HA1E	0.0157488	0.028349	0.00911825	0.00911825	0.648953	0.0294	0.5767	1.2822	1.2822	1.2822	0.2285	BRD-K17555800	talmapimod
CTSL	HEPG2	0.0157927	0.0971911	0.072846	0.072846	0.600139	-0.17825	0.3702	0.7976	0.5269	0.5269	-0.5492	BRD-K94176593	TWS-119
CTSL	HCC515	0.015869	0.238757	0.0724085	0.0724085	0.0124661	-0.1524	0.455	0.2762	0.2762	0.2762	1.3237	BRD-K24050847	KIN001-270
CTSL	HCC515	0.0159167	0.119663	0.135249	0.135249	0.090422	-0.1524	0.3861	0.6002	0.0753	0.0753	0.3953	BRD-K12184916	NVP-BEZ235
CTSL	A375	0.0159762	0.0317163	0.0913044	0.0913044	0.108257	0.0424	-0.4433	-1.6086	-0.5555	-0.5555	-1.0316	BRD-K59013864	AM-24
CTSL	MCF7	0.0159903	0.0395289	0.0721592	0.0721592	0.841622	-0.0333	-0.5975	-1.9404	-0.4647	-0.4647	0.2521	BRD-K23499943	alvespimycin
CTSL	A375	0.0161164	0.0738793	0.859205	0.859205	0.0204769	0.0424	0.6085	0.6924	0.391	0.391	1.2822	BRD-K46654563	zofenopril-calcium
CTSL	A375	0.0161675	0.561382	0.27905	0.27905	0.62978	0.0424	0.37025	0.30225	0.2393	0.2393	0.0109	BRD-K79090631	CGP-60474
CTSL	HA1E	0.0162222	0.184096	0.131284	0.131284	0.828187	0.0294	-0.5383	-0.6777	-0.6777	-0.6777	-0.0532	BRD-K29322660	edoxaban
CTSL	HA1E	0.0162934	0.335008	0.0249322	0.0249322	0.1116	0.0294	0.6732	1.22	1.1567	1.1567	1.0252	BRD-K51677086	erythromycin-ethylsuccinate
CTSL	HCC515	0.0163036	0.0378252	0.0395355	0.0395355	0.00761832	-0.1524	0.4368	0.9664	0.8325	0.8325	1.3802	BRD-K09951645	dabrafenib
CTSL	A375	0.0163896	0.283269	0.0957777	0.0957777	0.571129	0.0424	0.769	1.1412	0.7977	0.7977	0.3584	BRD-A64553394	DPI-201106
CTSL	HT29	0.0164095	0.141064	0.420202	0.420202	0.0700997	-0.0918	-0.644	-0.4561	-0.4561	-0.4561	-0.7525	BRD-A33697453	fenticonazole
CTSL	PC3	0.016443	0.268596	0.41004	0.41004	0.136467	-0.0109	0.6297	0.6064	0.18555	0.18555	0.6297	BRD-K68065987	MK-2206
CTSL	MCF7	0.016472	0.613144	0.694778	0.694778	0.0659856	-0.0333	0.64075	-0.5202	0.5147	0.5147	0.6817	BRD-A33280134	etoposide
CTSL	A549	0.0164924	0.0561127	0.0408117	0.0408117	0.090626	0.02615	-0.51895	-0.6125	-0.6125	-0.6125	-1.068	BRD-U24835547	GSK-1059615
CTSL	MCF7	0.0165473	0.0572143	0.0140988	0.0140988	0.633847	-0.0333	0.403	1.5021	0.5907	0.5907	0.7263	BRD-K45071273	tetracaine
CTSL	MCF7	0.0165703	0.737181	0.301365	0.301365	0.15947	-0.0333	0.6178	-0.6507	0.6782	0.6782	0.5574	BRD-K78096648	oxiperomide
CTSL	A375	0.0165703	0.14481	0.821665	0.821665	0.163192	0.0424	-0.4553	-0.3877	0.0532	0.0532	-0.5229	BRD-K72636697	QL-X-138
CTSL	A549	0.0165879	0.995771	0.0739516	0.0739516	0.872268	0.02615	0.4775	-0.0637	0.2843	0.2843	-0.2922	BRD-K50140147	NVP-TAE684
CTSL	A375	0.0166335	0.0243945	0.0649495	0.0649495	0.520339	0.0424	0.481	1.3704	0.7452	0.7452	0.4816	BRD-K76812510	metamizole
CTSL	MCF7	0.0166701	0.820164	0.205509	0.205509	0.180653	-0.0333	0.5488	-0.6937	0.7124	0.7124	0.4824	BRD-K02404261	caffeine
CTSL	A375	0.0166787	0.022132	0.00017826	0.00017826	0.481086	0.0424	-0.51095	-1.7086	-1.3396	-1.3396	0.5806	BRD-K22662435	ganciclovir
CTSL	A375	0.016806	0.977329	0.040409	0.040409	0.121088	0.0424	0.8447	-0.0573	1.0105	1.0105	-0.6227	BRD-K76810206	nicergoline
CTSL	HA1E	0.0168454	0.163556	0.0197699	0.0197699	0.318503	0.0294	0.6133	0.6126	0.7342	0.7342	0.4388	BRD-K95260951	asenapine
CTSL	HEPG2	0.0168485	0.303205	0.17396	0.17396	0.1429	-0.17825	0.3878	0.2321	0.3904	0.3904	0.8561	BRD-K99616396	motesanib
CTSL	HA1E	0.0168822	0.41425	0.358424	0.358424	0.109729	0.0294	-0.671	-0.4303	-0.4303	-0.4303	-0.7272	BRD-A15297126	fluocinolone-acetonide
CTSL	PC3	0.0168968	0.0931206	0.00590371	0.00590371	0.907698	-0.0109	0.56	0.693	0.7427	0.7427	-0.084	BRD-K70924353	amtolmetin-guacil
CTSL	A375	0.0169342	0.020799	0.00896628	0.00896628	0.256896	0.0424	-0.7421	-1.1591	-0.9404	-0.9404	-1.9495	BRD-A29734509	disopyramide
CTSL	MCF7	0.0169438	0.227071	0.0419259	0.0419259	0.841974	-0.0333	0.1773	1.3791	0.8875	0.8875	0.0385	BRD-K99023089	AZD-5363
CTSL	MCF7	0.0169897	0.197353	0.0533536	0.0533536	0.178023	-0.0333	0.78125	0.7419	0.7964	0.7964	0.7868	BRD-K45924332	amrinone
CTSL	A549	0.017038	0.258905	0.0772922	0.0772922	0.101312	0.02615	-0.4332	-1.7748	-0.5137	-0.5137	-0.57005	BRD-K16189898	CHIR-99021
CTSL	A375	0.0171095	0.455249	0.219817	0.219817	0.722793	0.0424	-0.2505	-0.2433	-0.2423	-0.2423	0.1974	BRD-A61221616	medroxyprogesterone-acetate
CTSL	MCF7	0.01725	0.0118315	0.0495348	0.0495348	0.128022	-0.0333	0.2201	0.7914	0.3711	0.3711	0.59255	BRD-K06569345	HG-5-88-01
CTSL	HA1E	0.017263	0.202972	0.151527	0.151527	0.065904	0.0294	-0.49095	-0.6877	-0.466	-0.466	-0.8583	BRD-K55847762	lobenzarit
CTSL	MCF7	0.0172865	0.732111	0.147824	0.147824	0.030474	-0.0333	0.26675	0.0818	-0.1689	-0.1689	0.63635	BRD-K17743125	belinostat
CTSL	HA1E	0.0173382	0.0571623	0.0496465	0.0496465	0.90559	0.0294	-0.40925	-0.9624	-0.4828	-0.4828	-0.4624	BRD-K05977355	fluconazole
CTSL	PC3	0.0173891	0.0809625	0.372879	0.372879	0.0837847	-0.0109	0.8571	0.9503	0.328	0.328	1.6733	BRD-K46386702	ARRY-334543
CTSL	HT29	0.0174175	0.21658	0.108991	0.108991	0.92521	-0.0918	0.49115	0.2023	0.77	0.77	0.1482	BRD-K63750851	mycophenolic-acid
CTSL	HEPG2	0.0174501	0.895204	0.138136	0.138136	0.434056	-0.17825	0.3858	-0.3639	0.306	0.306	0.0535	BRD-K24496482	SB-590885
CTSL	HA1E	0.0176323	0.899355	0.0501764	0.0501764	0.540077	0.0294	0.471	-0.1686	0.5279	0.5279	0.2486	BRD-K74363950	aclidinium
CTSL	HT29	0.0176755	0.163834	0.0887275	0.0887275	0.182368	-0.0918	-0.4133	-0.4215	-0.4215	-0.4215	-0.3607	BRD-K25114078	aminoguanidine
CTSL	MCF7	0.0176802	0.624239	0.0196853	0.0196853	0.499239	-0.0333	0.51715	0.0616	1.3584	1.3584	0.4766	BRD-K72166146	dihydroergotamine
CTSL	HA1E	0.0178116	0.23189	0.101105	0.101105	0.118634	0.0294	0.381	0.72765	0.34625	0.34625	1.1873	BRD-A39390670	rabeprazole
CTSL	A375	0.0179132	0.0899355	0.0229769	0.0229769	0.293954	0.0424	-0.534	-0.9195	-0.4981	-0.4981	-0.5699	BRD-K35589454	danegaptide
CTSL	HEPG2	0.0179658	0.92077	0.316165	0.316165	0.0132922	-0.17825	-0.6709	0.025	-0.5136	-0.5136	-1.388	BRD-K17588104	JQ1-(-)
CTSL	A375	0.018039	0.604881	0.127821	0.127821	0.142662	0.0424	-0.4364	-0.3955	-0.3955	-0.3955	-0.6575	BRD-K55781385	BMS-927711
CTSL	A375	0.0180682	0.705976	0.378624	0.378624	0.482612	0.0424	-0.5359	0.1613	-0.0242	-0.0242	-0.2713	BRD-K11071038	ICI-162846
CTSL	HEPG2	0.0181275	0.26941	0.0314463	0.0314463	0.123476	-0.17825	0.3966	0.40295	0.5271	0.5271	0.2855	BRD-U70626184	BI-2536
CTSL	HA1E	0.0181317	0.568868	0.104661	0.104661	0.146291	0.0294	-0.5594	0.3253	-0.64815	-0.64815	-0.5594	BRD-K85402309	dovitinib
CTSL	HT29	0.018162	0.859993	0.238659	0.238659	0.290143	-0.0918	0.38625	-0.2984	0.227	0.227	0.5205	BRD-K02079473	oxatomide
CTSL	HCC515	0.0182019	0.23658	0.630024	0.630024	0.318631	-0.1524	0.67465	0.6748	-0.238	-0.238	0.6846	BRD-K36740062	GSK-1070916
CTSL	MCF7	0.0182321	0.827888	0.290312	0.290312	0.151724	-0.0333	-0.7285	0.5166	-0.376	-0.376	-0.7182	BRD-K47983010	BX-795
CTSL	PC3	0.0182909	0.80423	0.691366	0.691366	0.0553596	-0.0109	0.55665	0.5085	-0.0796	-0.0796	1.4606	BRD-K43578482	defactinib
CTSL	HA1E	0.0183421	0.881463	0.088228	0.088228	0.871377	0.0294	-0.66685	0.3982	-0.7458	-0.7458	-0.123	BRD-A02990301	lofexidine
CTSL	HCC515	0.0183449	0.446266	0.31017	0.31017	0.430081	-0.1524	0.4849	0.2987	0.2236	0.2236	0.0804	BRD-K12343256	trametinib
CTSL	MCF7	0.0183679	0.0500126	0.133393	0.133393	0.587698	-0.0333	0.51515	0.7496	0.3532	0.3532	-0.1038	BRD-K84996356	AZD-3514
CTSL	A375	0.0184013	0.24636	0.0748791	0.0748791	0.110755	0.0424	0.341	0.3669	0.3669	0.3669	0.733	BRD-K97101532	VX-661
CTSL	PC3	0.0184115	0.0710593	0.0340683	0.0340683	0.00535923	-0.0109	0.8191	0.7995	0.7995	0.7995	2.3549	BRD-K74190368	resorcinol
CTSL	HA1E	0.018467	0.953692	0.608185	0.608185	0.0727665	0.0294	-0.3606	0.2343	0.1096	0.1096	-1.3403	BRD-K20526256	HG-14-10-04
CTSL	HT29	0.0184695	0.455042	0.251965	0.251965	0.326238	-0.0918	0.44745	0.5493	0.2152	0.2152	0.6533	BRD-K97729603	pimecrolimus
CTSL	A549	0.0185298	0.670005	0.170751	0.170751	0.654083	0.02615	0.368	0.1209	0.33485	0.33485	0.2524	BRD-K68191783	ALW-II-38-3
CTSL	HT29	0.0185495	0.889972	0.0384916	0.0384916	0.0644845	-0.0918	0.39805	0.153	0.4086	0.4086	0.6745	BRD-K98004573	rupatadine
CTSL	PC3	0.0186344	0.547374	0.0531468	0.0531468	0.0102076	-0.0109	0.4498	-0.0176	0.7987	0.7987	1.3155	BRD-K73196317	urapidil
CTSL	MCF7	0.0187249	0.821918	0.09043	0.09043	0.280616	-0.0333	0.64775	-0.3173	0.7278	0.7278	0.5922	BRD-K63343048	orlistat
CTSL	PC3	0.018757	0.0424597	0.00715163	0.00715163	0.181277	-0.0109	0.6407	0.9176	0.7749	0.7749	0.7975	BRD-K15976406	telbivudine
CTSL	HEPG2	0.018873	0.823441	0.0894453	0.0894453	0.169542	-0.17825	-0.6901	-0.6559	-0.7243	-0.7243	-0.5753	BRD-K41895714	AS-605240
CTSL	A375	0.0189046	0.0661604	0.00332626	0.00332626	0.817113	0.0424	0.6141	1.2512	1.0616	1.0616	0.4213	BRD-K28115081	apafant
CTSL	HT29	0.0189239	0.449988	0.0865605	0.0865605	0.58646	-0.0918	0.37765	0.0528	0.2474	0.2474	0.2986	BRD-K15933101	ropinirole
CTSL	HA1E	0.0190155	0.677522	0.171828	0.171828	0.418766	0.0294	0.51735	0.7543	0.5579	0.5579	0.4768	BRD-A75479906	rimantadine
CTSL	A375	0.0190328	0.162307	0.0592572	0.0592572	0.261863	0.0424	0.8161	1.3955	0.9259	0.9259	1.7876	BRD-K01577834	adenosine
CTSL	HEPG2	0.0190372	0.0704252	0.101042	0.101042	0.362135	-0.17825	-0.6722	-1.5238	-0.6992	-0.6992	-0.4226	BRD-K05104363	PD-184352
CTSL	A375	0.0191704	0.167674	0.0705566	0.0705566	0.660661	0.0424	0.66225	0.4732	0.4732	0.4732	-0.1994	BRD-K13646352	midostaurin
CTSL	PC3	0.0192754	0.668079	0.0488683	0.0488683	0.996411	-0.0109	0.50565	-0.4551	0.6058	0.6058	-0.4285	BRD-K65928735	AZD-1480
CTSL	PC3	0.0192859	0.240229	0.619209	0.619209	0.707056	-0.0109	0.51385	0.621	0.1025	0.1025	0.2122	BRD-K19220233	JNK-9L
CTSL	A375	0.0193146	0.415697	0.0104946	0.0104946	0.397107	0.0424	-0.3046	-0.2868	-0.4658	-0.4658	-0.37555	BRD-K64800655	PHA-793887
CTSL	PC3	0.0193279	0.104656	0.921283	0.921283	0.0426637	-0.0109	-0.22025	-1.4167	0.2688	0.2688	-1.4981	BRD-K08547377	irinotecan
CTSL	HCC515	0.0193633	0.392658	0.129599	0.129599	0.598864	-0.1524	0.1621	0.2815	0.0662	0.0662	0.1651	BRD-K25340465	OSI-930
CTSL	HEPG2	0.0193694	0.298183	0.143115	0.143115	0.0782759	-0.17825	0.19625	0.1716	0.0304	0.0304	0.6152	BRD-A68739437	NPK76-II-72-1
CTSL	A375	0.0193712	0.442338	0.559892	0.559892	0.433081	0.0424	-0.294	-0.2974	-0.2281	-0.2281	0.0678	BRD-K03406345	azacitidine
CTSL	HA1E	0.0194278	0.139974	0.52177	0.52177	0.329121	0.0294	0.93395	1.1102	-0.1917	-0.1917	0.8635	BRD-K52172416	anastrozole
CTSL	HA1E	0.0194698	0.261367	0.220252	0.220252	0.41463	0.0294	-0.387	-0.3257	-0.115	-0.115	-0.3292	BRD-K74514084	pazopanib
CTSL	MCF7	0.0195742	0.239629	0.540061	0.540061	0.102509	-0.0333	-0.51575	0.3764	-0.097	-0.097	-1.08555	BRD-K51967704	BIIB-021
CTSL	HT29	0.0195978	0.357335	0.218175	0.218175	0.206467	-0.0918	0.5443	0.2932	0.2056	0.2056	0.5341	BRD-K47780086	penciclovir
CTSL	A375	0.0196672	0.00943744	0.486438	0.486438	0.0150912	0.0424	-0.713	-1.6433	-0.0097	-0.0097	-1.1939	BRD-K92093830	doxorubicin
CTSL	HA1E	0.0196891	0.323542	0.212721	0.212721	0.111378	0.0294	0.7191	0.7996	0.46695	0.46695	0.7191	BRD-K44353683	nateglinide
CTSL	PC3	0.019699	0.335287	0.334477	0.334477	0.0180389	-0.0109	-0.4643	-0.4342	-0.265	-0.265	-1.2173	BRD-K53328210	JW55
CTSL	HA1E	0.0197104	0.575788	0.346669	0.346669	0.480063	0.0294	0.60035	-0.5221	0.2974	0.2974	-0.8748	BRD-A63236097	andrographolide
CTSL	MCF7	0.0197171	0.182127	0.0456771	0.0456771	0.0599827	-0.0333	-0.5537	-1.0294	-0.7071	-0.7071	-1.3605	BRD-K56800335	guanaben-acetate
CTSL	MCF7	0.0197813	0.266391	0.551819	0.551819	0.203697	-0.0333	0.6805	0.2915	0.2915	0.2915	1.4053	BRD-K35960502	niclosamide
CTSL	PC3	0.0198148	NA	NA	NA	NA	-0.0109	1.2639	NA	NA	NA	NA	BRD-K61688984	RGFP-966
CTSL	A375	0.0198199	0.0522333	0.0103417	0.0103417	0.994527	0.0424	0.47	0.9383	0.6626	0.6626	0.0036	BRD-K76205745	losartan
CTSL	HA1E	0.0198478	0.448526	0.0347886	0.0347886	0.632053	0.0294	-0.2878	-0.3302	-0.6555	-0.6555	-0.0434	BRD-K93208532	apremilast
CTSL	HA1E	0.0198584	0.577804	0.0666676	0.0666676	0.146018	0.0294	-0.69885	0.3988	-0.7117	-0.7117	-1.2903	BRD-K03384561	roquinimex
CTSL	PC3	0.0199788	0.0250338	0.0730438	0.0730438	0.95616	-0.0109	-0.74975	-0.8445	-0.8445	-0.8445	0.1157	BRD-K38868394	MK-0773
CTSL	A375	0.0200104	0.072155	0.160032	0.160032	0.805715	0.0424	-0.44225	-0.8052	-0.5447	-0.5447	-0.0706	BRD-K41160163	fenobam
CTSL	MCF7	0.0200382	0.336447	0.239479	0.239479	0.0697219	-0.0333	0.583	-0.4364	0.7673	0.7673	0.8688	BRD-K33251802	miglustat
CTSL	A375	0.0200849	0.392295	0.102191	0.102191	0.216581	0.0424	0.68595	-0.3942	0.6893	0.6893	0.702	BRD-K17513304	firategrast
CTSL	HA1E	0.0201251	0.570428	0.724987	0.724987	0.153674	0.0294	-0.44565	-0.129	-0.129	-0.129	-0.4043	BRD-K15409150	penfluridol
CTSL	A375	0.0201434	0.0759056	0.249192	0.249192	0.0317566	0.0424	-0.39075	-0.57185	-0.3621	-0.3621	-1.0241	BRD-K99749624	linifanib
CTSL	HEPG2	0.0201642	0.450017	0.112406	0.112406	0.00993755	-0.17825	-0.78335	-0.86	-0.7703	-0.7703	-1.6192	BRD-K68336408	tyrphostin-AG-1478
CTSL	HCC515	0.0201731	0.0688801	0.306304	0.306304	0.0935938	-0.1524	0.3261	0.675	0.1763	0.1763	0.7558	BRD-K12502280	TG-101348
CTSL	HEPG2	0.02028	0.00797173	0.121018	0.121018	0.394124	-0.17825	-1.06235	-1.76	-0.7889	-0.7889	-1.2664	BRD-K91900765	VX-745
CTSL	HT29	0.0203689	0.1173	0.0970303	0.0970303	0.31883	-0.0918	0.3968	0.3968	0.287	0.287	0.71405	BRD-K92049597	triamterene
CTSL	MCF7	0.0205534	0.0362759	0.0366493	0.0366493	0.254922	-0.0333	0.627	1.4483	0.306	0.306	-0.9257	BRD-K34341643	glasdegib
CTSL	PC3	0.0205624	0.709659	0.495103	0.495103	0.145317	-0.0109	-0.4822	-0.3504	-0.2778	-0.2778	-0.4674	BRD-K64755930	etazolate
CTSL	MCF7	0.0205835	0.1401	0.0751336	0.0751336	0.537202	-0.0333	0.46715	0.8881	0.4716	0.4716	-0.0967	BRD-K78513633	lonidamine
CTSL	A375	0.0205906	0.302603	0.0973072	0.0973072	0.113473	0.0424	-0.3619	-0.6316	-0.2805	-0.2805	-1.11615	BRD-A63675168	brivudine
CTSL	HT29	0.0207191	0.119748	0.0537819	0.0537819	0.983838	-0.0918	-0.6303	-0.6393	-0.6393	-0.6393	-0.3322	BRD-A00546892	biperiden
CTSL	HA1E	0.0208109	0.337977	0.200409	0.200409	0.472143	0.0294	-0.5195	-0.2727	-0.2727	-0.2727	-0.5371	BRD-K59875992	FPL-62064
CTSL	MCF7	0.0208302	0.572566	0.257037	0.257037	0.633847	-0.0333	-0.8188	0.1188	-0.519	-0.519	-0.8095	BRD-K85140930	aphidicolin
CTSL	HCC515	0.0209094	0.503812	0.532026	0.532026	0.0233252	-0.1524	0.43655	-0.247	-0.469	-0.469	1.6681	BRD-K16485616	mocetinostat
CTSL	HA1E	0.0210217	0.241296	0.0549457	0.0549457	0.835097	0.0294	0.81355	0.7136	0.9135	0.9135	-0.453	BRD-K34154330	tracazolate
CTSL	HT29	0.0211539	0.632113	0.475536	0.475536	0.276401	-0.0918	0.4241	0.0372	0.0372	0.0372	0.3384	BRD-K67789209	adatanserin
CTSL	A549	0.0211603	0.631426	0.347698	0.347698	0.131314	0.02615	0.43055	0.05655	0.24485	0.24485	0.82745	BRD-K82484347	GSK-J2
CTSL	MCF7	0.0211828	0.631279	0.0919919	0.0919919	0.501533	-0.0333	0.5717	-0.0249	0.6803	0.6803	0.0552	BRD-K33141550	L-NAME
CTSL	MCF7	0.0212034	0.273045	0.229753	0.229753	0.0469312	-0.0333	-0.75945	-0.7381	-0.7381	-0.7381	-0.7895	BRD-K98251413	IOX2
CTSL	PC3	0.0212814	0.162623	0.018308	0.018308	0.507543	-0.0109	-0.6504	-0.8558	-0.69825	-0.69825	-1.0742	BRD-K30550578	PF-04620110
CTSL	MCF7	0.0212937	0.975755	0.174111	0.174111	0.178897	-0.0333	0.4297	-0.0454	0.3228	0.3228	0.4297	BRD-K06240250	rilpivirine
CTSL	HA1E	0.0213132	0.936848	0.145234	0.145234	0.491148	0.0294	-0.4587	0.3311	-0.6558	-0.6558	-0.1342	BRD-K24050847	KIN001-270
CTSL	HCC515	0.0213192	0.995628	0.993741	0.993741	0.103648	-0.1524	0.1419	-0.2038	-0.3625	-0.3625	0.5275	BRD-K13094524	PFI-1
CTSL	HA1E	0.0214133	0.116902	0.173838	0.173838	0.998613	0.0294	0.64295	1.3086	0.7519	0.7519	0.35635	BRD-K08109215	I-BET-762
CTSL	HT29	0.0214577	0.786962	0.276124	0.276124	0.337314	-0.0918	0.506	0.0545	0.24405	0.24405	0.5789	BRD-K71480163	GDC-0068
CTSL	A375	0.0214908	0.044869	0.314353	0.314353	0.0072965	0.0424	0.91985	-0.9669	-0.6424	-0.6424	1.6693	BRD-K14529030	meisoindigo
CTSL	HEPG2	0.0215929	0.0387121	0.072846	0.072846	0.70466	-0.17825	0.47245	0.5259	0.5018	0.5018	0.4431	BRD-K07691486	roscovitine
CTSL	MCF7	0.0216605	0.171999	0.00271697	0.00271697	0.960068	-0.0333	-0.64185	-1.0415	-1.0415	-1.0415	0	BRD-A26503646	formestane
CTSL	HA1E	0.0216654	0.135666	0.0307152	0.0307152	0.601569	0.0294	-0.3763	-0.5718	-0.5718	-0.5718	-0.3244	BRD-A12237696	L-citrulline
CTSL	PC3	0.0217659	0.100346	0.0529345	0.0529345	0.084143	-0.0109	0.43945	0.8411	0.4761	0.4761	0.973	BRD-K66847579	WZ-7043
CTSL	A375	0.0218095	0.0528301	0.00468386	0.00468386	0.447594	0.0424	0.488	1.3274	0.9011	0.9011	0.4586	BRD-A96060515	ipratropium
CTSL	HT29	0.0218152	0.134255	0.0490145	0.0490145	0.880219	-0.0918	0.5426	0.7852	0.6537	0.6537	-0.229	BRD-K68488863	ENMD-2076
CTSL	A375	0.021821	0.0314062	0.0640923	0.0640923	0.641603	0.0424	-0.42105	-0.8795	-0.6039	-0.6039	-0.1912	BRD-A02710418	meptazinol
CTSL	PC3	0.021836	0.708915	0.0217164	0.0217164	0.150922	-0.0109	-0.6343	-0.0397	-0.6753	-0.6753	-1.5274	BRD-A01645196	garcinol
CTSL	A375	0.0219014	0.0331444	0.0138625	0.0138625	0.978892	0.0424	0.6613	0.9283	0.7567	0.7567	-0.1334	BRD-K59436580	tedizolid
CTSL	A375	0.0220513	0.0640913	0.0196856	0.0196856	0.24318	0.0424	-0.5953	-0.747	-0.5944	-0.5944	1.0364	BRD-K15010214	emedastine
CTSL	A375	0.0222254	0.382608	0.0457633	0.0457633	0.553284	0.0424	0.52915	0.302	0.4641	0.4641	0.2548	BRD-A91877226	capecitabine
CTSL	MCF7	0.0223547	0.134634	0.031741	0.031741	0.103856	-0.0333	-0.4017	-0.7441	-0.5082	-0.5082	-0.3971	BRD-A39996500	radicicol
CTSL	HCC515	0.0223924	0.456141	0.626684	0.626684	0.36593	-0.1524	0.4812	0.4945	-0.1177	-0.1177	0.9921	BRD-K08109215	I-BET-762
CTSL	A375	0.0224426	0.724997	0.389926	0.389926	0.0849454	0.0424	-0.4955	0.445	-0.2386	-0.2386	-1.5104	BRD-A29731977	17-hydroxyprogesterone-caproate
CTSL	HCC515	0.022527	NA	NA	NA	NA	-0.1524	-1.2787	NA	NA	NA	NA	BRD-A61304759	tanespimycin
CTSL	HT29	0.0225538	0.926291	0.128834	0.0658711	0.292856	-0.0918	0.97545	-0.0343	0.9108	0.97545	2.3333	BRD-K68552125	phorbol-myristate-acetate
CTSL	MCF7	0.0226007	0.64481	0.10193	0.10193	0.0301057	-0.0333	-0.64395	-0.7017	-0.7075	-0.7075	-1.4093	BRD-K13154216	everolimus
CTSL	A375	0.0226126	0.895531	0.0489808	0.0489808	0.756825	0.0424	0.75785	-0.0281	0.8791	0.8791	-0.0187	BRD-K80343549	TAK-285
CTSL	A375	0.0226439	0.397193	0.391919	0.391919	0.223958	0.0424	-0.4814	-0.3918	-0.3644	-0.3644	-0.4895	BRD-K78659596	ixazomib
CTSL	A375	0.0226559	0.895062	0.0177978	0.0177978	0.400979	0.0424	-0.4149	-0.24565	-0.47295	-0.47295	-0.5067	BRD-K41895714	AS-605240
CTSL	HEPG2	0.0226576	0.326496	0.0291237	0.0291237	0.350918	-0.17825	0.374	0.7198	0.6774	0.6774	0.3512	BRD-K80738081	resveratrol
CTSL	A375	0.0227192	0.905617	0.096852	0.096852	0.108257	0.0424	0.57335	-0.0082	0.7779	0.7779	0.8131	BRD-K30685142	levothyroxine
CTSL	A375	0.0227192	0.454066	0.00404883	0.00404883	0.153934	0.0424	-0.3878	-0.3359	-0.8412	-0.8412	-0.4397	BRD-K61567297	resatorvid
CTSL	HT29	0.0228047	0.602884	0.0217726	0.0217726	0.544365	-0.0918	-0.6201	-0.4053	-0.8349	-0.8349	-0.0923	BRD-K44100512	KIN001-043
CTSL	A375	0.0228143	0.795869	0.0638086	0.0638086	0.526079	0.0424	-0.6998	0.3353	-0.8654	-0.8654	-0.1416	BRD-K73524797	ST-1859
CTSL	HA1E	0.0228241	0.9091	0.603232	0.603232	0.0770259	0.0294	0.50395	0.0041	0.0041	0.0041	0.5916	BRD-K53665955	MK-5108
CTSL	HA1E	0.022836	0.173444	0.0607473	0.0607473	0.838172	0.0294	-0.40545	-0.329	-0.329	-0.329	-0.4312	BRD-K11071038	ICI-162846
CTSL	PC3	0.0228867	0.702603	0.24539	0.24539	0.160826	-0.0109	-0.5833	0.3577	-0.3765	-0.3765	-1.0124	BRD-U24835547	GSK-1059615
CTSL	A375	0.0229457	0.329554	0.0333783	0.0333783	0.599081	0.0424	0.6443	0.7816	0.7816	0.7816	0.1661	BRD-A56371469	AGI-5198
CTSL	PC3	0.0229477	0.127075	0.680563	0.680563	0.386179	-0.0109	0.4398	0.4227	0.3139	0.3139	0.8888	BRD-A82396632	miconazole
CTSL	PC3	0.0229477	0.0999331	0.503884	0.503884	0.194167	-0.0109	-0.5196	-0.5242	-0.515	-0.515	-0.4511	BRD-K02900412	clofoctol
CTSL	HT29	0.0230703	0.543054	0.102124	0.102124	0.186288	-0.0918	0.3558	0.4797	0.4797	0.4797	0.3447	BRD-K73107279	levamisole
CTSL	A375	0.023104	0.347789	0.0896244	0.0896244	0.516709	0.0424	-0.2116	-0.12205	-0.1478	-0.1478	-0.43395	BRD-K56343971	vemurafenib
CTSL	PC3	0.0231315	0.192797	0.0695195	0.0695195	0.719729	-0.0109	0.6737	1.3899	0.6735	0.6735	-0.264	BRD-A12237696	L-citrulline
CTSL	PC3	0.0232054	0.552042	0.956117	0.956117	0.0267674	-0.0109	0.55395	0.0476	0.0476	0.0476	2.1536	BRD-K09078998	deforolimus
CTSL	HEPG2	0.0232395	0.57057	0.0339876	0.0339876	0.563287	-0.17825	0.4838	0.5848	0.5848	0.5848	0.0221	BRD-K93123848	RAF-265
CTSL	HA1E	0.0232951	0.0224319	0.0175246	0.0175246	0.858219	0.0294	0.6113	1.4109	0.8002	0.8002	0.0909	BRD-A32172948	methiopril
CTSL	HT29	0.0233262	0.110854	0.096287	0.096287	0.981474	-0.0918	0.4101	0.5701	0.4785	0.4785	0.0088	BRD-A82522119	tibolone
CTSL	A375	0.0233803	0.27285	0.0765078	0.0765078	0.0838869	0.0424	0.5629	0.5386	0.5579	0.5579	0.8554	BRD-K68191783	ALW-II-38-3
CTSL	HA1E	0.0233805	0.166251	0.0969729	0.0969729	0.220241	0.0294	0.55455	0.5454	0.5454	0.5454	-0.3529	BRD-K69116396	sertindole
CTSL	HA1E	0.0234587	0.468814	0.290744	0.290744	0.00842981	0.0294	0.5605	0.278	0.2738	0.2738	1.6268	BRD-K21295289	senicapoc
CTSL	HT29	0.0237957	0.00923413	0.0292715	0.0292715	0.79915	-0.0918	0.2159	1.3944	1.0234	1.0234	-0.198	BRD-K63150726	JTE-907
CTSL	HEPG2	0.0238486	0.852847	0.314558	0.314558	0.0387121	-0.17825	-0.9947	-0.5646	-0.66475	-0.66475	-1.3294	BRD-K06569345	HG-5-88-01
CTSL	PC3	0.0239129	0.147018	0.0227146	0.0227146	0.43226	-0.0109	-0.403	-0.6021	-0.6021	-0.6021	-0.3599	BRD-K76908866	CP-724714
CTSL	MCF7	0.0241129	0.328125	0.0670723	0.0670723	0.750829	-0.0333	0.1862	0.1862	0.171	0.171	-0.2196	BRD-K28115081	apafant
CTSL	A375	0.0241455	0.142129	0.0505927	0.0505927	0.181033	0.0424	-0.3864	-0.543	-0.543	-0.543	-0.8195	BRD-A55913614	primaquine
CTSL	PC3	0.0241847	0.218553	0.0350287	0.0350287	0.747953	-0.0109	0.3667	0.5708	0.5708	0.5708	-0.0069	BRD-K70463136	BAY-87-2243
CTSL	A375	0.0242332	0.072466	0.00926714	0.00926714	0.58116	0.0424	-0.65445	-0.8653	-0.8572	-0.8572	-0.6139	BRD-K23204545	busulfan
CTSL	MCF7	0.024285	0.168068	0.274593	0.274593	0.27344	-0.0333	-0.6254	-0.686	-0.3507	-0.3507	-0.7027	BRD-K09078998	deforolimus
CTSL	MCF7	0.0243031	0.289765	0.0582837	0.0582837	0.0943308	-0.0333	-0.5482	-0.2936	-0.5135	-0.5135	-0.7795	BRD-A22081593	sulmazole
CTSL	HA1E	0.0243131	0.484973	0.0802284	0.0802284	0.340464	0.0294	0.67175	0.8371	0.8371	0.8371	0.9691	BRD-A38350138	ketoconazole
CTSL	HT29	0.0243368	0.123555	0.0666079	0.0666079	0.227236	-0.0918	-0.6485	-1.3631	-0.7996	-0.7996	-1.1892	BRD-K90382497	GW-843682X
CTSL	MCF7	0.0243895	0.281019	0.0352014	0.0352014	0.766621	-0.0333	0.5842	0.1128	0.8263	0.8263	-0.1515	BRD-K70592483	phenylacetylglutamine
CTSL	A375	0.0243969	0.0333065	0.0119114	0.0119114	0.60762	0.0424	0.5944	1.6719	0.9347	0.9347	0.0826	BRD-K06557128	voriconazole
CTSL	HT29	0.0244131	0.410157	0.180203	0.180203	0.224019	-0.0918	-0.6754	-0.6628	-0.6628	-0.6628	-0.8274	BRD-K52183142	pregnenolone
CTSL	MCF7	0.0244477	0.17285	0.0478904	0.0478904	0.392934	-0.0333	-0.4028	-0.4093	-0.4093	-0.4093	-0.2904	BRD-K86856088	UNC-0638
CTSL	MCF7	0.0244593	0.347213	0.426445	0.426445	0.11461	-0.0333	0.3247	0.3139	0.229	0.229	0.7995	BRD-K23728141	tafamidis-meglumine
CTSL	A375	0.0244601	0.0774291	0.134822	0.134822	0.10195	0.0424	0.477	1.3693	0.4395	0.4395	0.5479	BRD-K16508793	diazepam
CTSL	PC3	0.0245708	0.544716	0.0588438	0.0588438	0.285761	-0.0109	0.71915	0.7119	0.7609	0.7609	0.7264	BRD-K96936751	bretazenil
CTSL	A375	0.0245814	0.0245814	NA	0.0245814	0.0245814	0.0424	-0.8275	-0.8275	NA	-0.8275	-0.8275	BRD-A11170096	pravastatin
CTSL	PC3	0.0246072	0.105115	0.177682	0.177682	0.0628755	-0.0109	-0.6736	-0.95095	-0.78625	-0.78625	-0.7625	BRD-K29656036	MK-8245
CTSL	PC3	0.0246097	0.650712	0.165644	0.165644	0.130345	-0.0109	-0.6291	0.0889	-0.7163	-0.7163	-0.5419	BRD-K15318383	ammonium-glycyrrhizinate
CTSL	A375	0.0246888	0.0930411	0.23482	0.23482	0.296214	0.0424	0.53225	0.7253	0.6793	0.6793	0.4765	BRD-K66876909	linezolid
CTSL	MCF7	0.0247843	0.129859	0.0587343	0.0587343	0.0371878	-0.0333	-0.7423	-0.7423	-0.7423	-0.7423	-1.63125	BRD-K18157228	fdcyd
CTSL	PC3	0.0248181	0.437683	0.458349	0.458349	0.502434	-0.0109	0.77475	0.2023	0.2023	0.2023	-0.1503	BRD-A96292436	eflornithine
CTSL	HA1E	0.0248235	0.248082	0.0372765	0.0372765	0.0485592	0.0294	-0.3073	-0.303	-0.5799	-0.5799	-1.1143	BRD-K26760349	HG-9-91-01
CTSL	HT29	0.0248466	0.0750532	0.0220948	0.0220948	0.834454	-0.0918	0.5152	0.5587	0.72605	0.72605	0.5152	BRD-A14886633	norgestrel
CTSL	A375	0.0248552	0.0613932	0.0451234	0.0451234	0.304445	0.0424	-0.51235	-0.6462	-0.3785	-0.3785	-0.6703	BRD-K63430059	methoxsalen
CTSL	HT29	0.0249793	0.160716	0.0484605	0.0484605	0.0732919	-0.0918	0.3578	1.7791	1.3285	1.3285	1.0369	BRD-K08252256	diclofenac
CTSL	A375	0.0250189	0.25078	0.197344	0.197344	0.638799	0.0424	-0.33595	-0.3407	-0.3407	-0.3407	-0.2384	BRD-K50000283	PHA-767491
CTSL	MCF7	0.0250611	0.0872661	0.0551314	0.0551314	0.073198	-0.0333	0.34945	0.8886	0.34945	0.34945	-0.6146	BRD-K93747373	HG-5-113-01
CTSL	HA1E	0.0250821	0.556471	0.686418	0.686418	0.107024	0.0294	0.57785	0.6197	0.3423	0.3423	0.8844	BRD-K02389548	RG-2833
CTSL	A375	0.0252168	0.530886	0.733155	0.733155	0.874641	0.0424	-0.50935	-0.3028	-0.0702	-0.0702	0.2444	BRD-K86525559	AZD-7762
CTSL	MCF7	0.0252208	0.0104176	0.0754351	0.0754351	0.832141	-0.0333	-0.471	-0.83695	-0.4405	-0.4405	0.03245	BRD-K94176593	TWS-119
CTSL	HA1E	0.0252254	0.473357	0.0423613	0.0423613	0.678963	0.0294	-0.5268	-0.5839	-0.5839	-0.5839	0.0436	BRD-K29656036	MK-8245
CTSL	PC3	0.0255327	0.416164	0.165468	0.165468	0.186388	-0.0109	-0.70335	-0.5154	-0.5154	-0.5154	-1.7	BRD-K23248433	camicinal
CTSL	HEPG2	0.0255564	0.215247	0.132498	0.132498	0.0939822	-0.17825	0.277	0.1675	0.1675	0.1675	-1.4596	BRD-K72414522	AZD-5438
CTSL	HEPG2	0.0255564	0.0764724	0.00964511	0.00964511	0.162961	-0.17825	-0.5244	-1.1332	-1.1332	-1.1332	-1.0456	BRD-K79018442	KIN001-260
CTSL	HA1E	0.02558	0.866729	0.0577299	0.0577299	0.33353	0.0294	-0.51105	0.0953	-0.6317	-0.6317	0.5803	BRD-K34313798	LY-215490
CTSL	HEPG2	0.0256987	0.443593	0.108286	0.108286	0.430904	-0.17825	0.1629	0.6873	0.6873	0.6873	0.1229	BRD-K51544265	cabozantinib
CTSL	HEPG2	0.0256987	0.255491	0.0499857	0.0499857	0.27391	-0.17825	0.40145	0.6548	0.5017	0.5017	0.3807	BRD-K80700417	SGI-1776
CTSL	HA1E	0.0257125	0.0152379	0.00663096	0.00663096	0.0219722	0.0294	-0.5844	-1.2944	-0.7973	-0.7973	-1.5051	BRD-K54640016	WAY-362450
CTSL	MCF7	0.0257342	0.627435	0.129206	0.129206	0.23999	-0.0333	-0.4538	-0.3673	-0.4197	-0.4197	-0.8207	BRD-K29653726	topiramate
CTSL	HT29	0.0258597	0.44703	0.165386	0.165386	0.444672	-0.0918	-0.8301	-0.3847	-0.6802	-0.6802	-1.094	BRD-K12994359	valdecoxib
CTSL	HA1E	0.0258855	0.875642	0.366649	0.366649	0.153958	0.0294	-0.5865	0.143	-0.2066	-0.2066	-0.6885	BRD-A75172220	hydrocortisone
CTSL	PC3	0.0259102	0.56481	0.619005	0.619005	0.23428	-0.0109	0.78245	0.4475	0.2711	0.2711	0.9888	BRD-K20745393	olprinone
CTSL	A549	0.0259294	0.135832	0.0255231	0.0255231	0.582664	0.02615	-0.26	-0.36425	-0.38795	-0.38795	-0.14115	BRD-K55591206	epigallocatechin-gallate-(-)
CTSL	HT29	0.0259975	0.82444	0.39299	0.39299	0.264799	-0.0918	-0.6558	-0.0018	-0.2641	-0.2641	-1.0886	BRD-K34313798	LY-215490
CTSL	HA1E	0.0260059	0.169589	0.531216	0.531216	0.292949	0.0294	0.533	0.7011	0.42	0.42	0.5089	BRD-A58955223	sulforaphane
CTSL	MCF7	0.0260156	0.0352436	0.103079	0.103079	0.0427482	-0.0333	0.50985	1.2038	0.444	0.444	0.8694	BRD-K06878038	deferiprone
CTSL	MCF7	0.0260207	0.916529	0.0844173	0.0844173	0.408817	-0.0333	-0.45165	0.006	-0.3967	-0.3967	-0.6146	BRD-K41895714	AS-605240
CTSL	HA1E	0.0261169	0.322819	0.0284035	0.0284035	0.111378	0.0294	-0.5913	-0.2988	-0.5913	-0.5913	-0.7566	BRD-A11319535	beclomethasone-dipropionate
CTSL	A375	0.0261674	0.414067	0.30694	0.30694	0.0514071	0.0424	0.5213	0.617	0.4988	0.4988	0.8698	BRD-A07395371	esmolol
CTSL	MCF7	0.026213	0.557621	0.910546	0.910546	0.908787	-0.0333	1.0122	-0.1802	-0.2218	-0.2218	-0.0472	BRD-K74305673	IKK-2-inhibitor-V
CTSL	PC3	0.0263613	0.0264262	0.0120855	0.0120855	0.720477	-0.0109	-0.39405	-1.1426	-0.6068	-0.6068	-0.2458	BRD-K14870255	R-428
CTSL	HA1E	0.02637	0.679684	0.108754	0.108754	0.772298	0.0294	-0.4476	-0.3908	-0.5032	-0.5032	0.2398	BRD-K92428153	mycophenolate-mofetil
CTSL	PC3	0.0263812	0.0767393	0.123063	0.123063	0.0242998	-0.0109	0.69595	1.17545	0.69595	0.69595	1.67885	BRD-K88544581	CI-976
CTSL	A375	0.026417	0.138357	0.477756	0.477756	0.859222	0.0424	0.3414	1.50765	0.1309	0.1309	0.0965	BRD-A63236097	andrographolide
CTSL	HT29	0.0264333	0.0677626	0.0669467	0.0669467	0.242614	-0.0918	0.4571	0.7372	0.4571	0.4571	0.3911	BRD-K92213669	lomitapide
CTSL	HT29	0.0264858	0.15149	0.153908	0.153908	0.559558	-0.0918	0.3569	0.3655	0.2789	0.2789	-0.5749	BRD-K84996356	AZD-3514
CTSL	PC3	0.0264929	0.0491761	0.0508118	0.0508118	0.320402	-0.0109	0.7644	1.3344	1.0917	1.0917	0.6134	BRD-A72309220	metergoline
CTSL	A375	0.0266135	0.890882	0.046753	0.046753	0.234584	0.0424	-0.4834	0.2371	-0.5619	-0.5619	0.8679	BRD-A93424738	dexamethasone-acetate
CTSL	HT29	0.0266736	0.271931	0.124847	0.124847	0.801271	-0.0918	-0.55215	-0.538	-0.55645	-0.55645	-0.04455	BRD-K08799216	pelitinib
CTSL	HT29	0.0266778	0.359922	0.029019	0.029019	0.661211	-0.0918	0.6485	1.1217	0.6513	0.6513	-0.4853	BRD-K25412176	GSK-2110183
CTSL	A375	0.0267248	0.0188811	0.0158116	0.0158116	0.946093	0.0424	0.5576	1.4732	0.83395	0.83395	-0.1195	BRD-A78723049	cefotetan
CTSL	HT29	0.0267742	0.606332	0.275692	0.275692	0.0887411	-0.0918	0.39925	0.1349	0.3552	0.3552	0.8175	BRD-K92731339	perindopril
CTSL	HEPG2	0.0268121	0.890953	0.463275	0.463275	0.412271	-0.17825	-0.6503	-0.2807	-0.3189	-0.3189	-0.7409	BRD-K12343256	trametinib
CTSL	PC3	0.0268332	0.0569038	0.0378896	0.0378896	0.891875	-0.0109	0.6269	0.8296	0.7178	0.7178	-0.0664	BRD-K04704168	clemizole
CTSL	PC3	0.0268332	0.0935107	0.0483094	0.0483094	0.314657	-0.0109	0.5428	0.7243	0.6211	0.6211	0.4733	BRD-K32501161	vanoxerine
CTSL	PC3	0.0269124	0.481781	0.224379	0.224379	0.16023	-0.0109	0.5537	0.36875	0.368	0.368	0.9847	BRD-K60341624	GSK-1292263
CTSL	HA1E	0.027181	0.599173	0.166376	0.166376	0.170509	0.0294	-0.33685	-0.2317	-0.2969	-0.2969	-0.6126	BRD-A67373739	AICA-ribonucleotide
CTSL	HA1E	0.027189	0.183447	0.0193399	0.0193399	0.277643	0.0294	0.5707	0.8712	0.8712	0.8712	0.2167	BRD-K81418486	vorinostat
CTSL	A375	0.0272879	0.174413	0.081667	0.081667	0.6259	0.0424	0.45195	0.6983	0.6904	0.6904	0.0739	BRD-K94176593	TWS-119
CTSL	HT29	0.0273022	0.150085	0.0996389	0.0996389	0.225907	-0.0918	-0.7091	-0.6865	-0.6865	-0.6865	-1.2463	BRD-K55187425	rigosertib
CTSL	MCF7	0.0273822	0.277811	0.0202167	0.0202167	0.600187	-0.0333	0.5856	0.7599	0.6846	0.6846	-0.0228	BRD-K88807631	elacridar
CTSL	MCF7	0.0274351	0.910689	0.181119	0.181119	0.412458	-0.0333	0.4235	-0.1294	0.4785	0.4785	0.4235	BRD-K63675182	triflupromazine
CTSL	A375	0.0274833	0.931282	0.0551217	0.0551217	0.0313676	0.0424	0.70645	0.3136	0.9546	0.9546	0.9229	BRD-K82236179	dicoumarol
CTSL	MCF7	0.0275275	0.122484	0.070284	0.070284	0.672885	-0.0333	0.478	1.7665	1.093	1.093	-0.1179	BRD-K93754473	tamoxifen
CTSL	PC3	0.0275303	0.406581	0.464289	0.464289	0.910048	-0.0109	-0.3061	-0.1462	-0.17115	-0.17115	0.0384	BRD-K79254416	decitabine
CTSL	MCF7	0.0276222	0.146136	0.0190518	0.0190518	0.554293	-0.0333	-0.55765	-1.1001	-0.6921	-0.6921	0.1296	BRD-K17500877	bropirimine
CTSL	HCC515	0.0277758	0.103648	0.0265523	0.0265523	0.721713	-0.1524	-0.0313	0.6722	0.89585	0.89585	-0.1991	BRD-K21906513	UNC-669
CTSL	HA1E	0.0278281	0.246875	0.392336	0.392336	0.742724	0.0294	0.5151	1.2328	0.565	0.565	0.3813	BRD-K00259736	colchicine
CTSL	PC3	0.0279288	0.0336752	0.0796364	0.0796364	0.448678	-0.0109	0.59515	1.2254	1.2254	1.2254	-0.0773	BRD-K24219278	amineptine
CTSL	A375	0.0279344	0.933619	0.68731	0.68731	0.0634601	0.0424	0.6718	0.0117	0.0117	0.0117	1.0104	BRD-K08252256	diclofenac
CTSL	A375	0.027977	0.483529	0.432642	0.432642	0.0210435	0.0424	-0.5919	-0.7107	-0.7107	-0.7107	-1.1379	BRD-K04112579	nepafenac
CTSL	HA1E	0.0279991	0.282022	0.102759	0.102759	0.611887	0.0294	-0.33185	-0.3526	-0.3526	-0.3526	-0.2482	BRD-A10903566	imiloxan
CTSL	HT29	0.028027	0.68211	0.781672	0.781672	0.0363152	-0.0918	0.48905	-0.4456	-0.4302	-0.4302	0.8203	BRD-K46692793	umeclidinium
CTSL	HA1E	0.0281854	0.388845	0.504588	0.504588	0.0822641	0.0294	-0.506	0.3075	0.0532	0.0532	-0.8466	BRD-K30466858	ellagic-acid
CTSL	HT29	0.0281957	0.0708085	0.157298	0.157298	0.0126815	-0.0918	0.5969	1.28135	0.52105	0.52105	1.413	BRD-K86930074	cediranib
CTSL	A375	0.0282077	0.0272301	0.0012015	0.0012015	0.789826	0.0424	0.4098	1.79545	1.594	1.594	0.0699	BRD-K71075609	dorzolamide
CTSL	HT29	0.028243	0.817524	0.513681	0.513681	0.957052	-0.0918	0.5718	0.0313	0.0313	0.0313	-0.3777	BRD-K66175015	afatinib
CTSL	HA1E	0.0283112	0.145609	0.223882	0.223882	0.29749	0.0294	0.328	0.772	0.328	0.328	0.3257	BRD-K02950022	BMS-299897
CTSL	HT29	0.0283734	0.615337	0.122848	0.122848	0.00307657	-0.0918	0.3384	0.2447	0.4321	0.4321	3.1515	BRD-A67097164	ifosfamide
CTSL	PC3	0.0284801	0.0996243	0.0629439	0.0629439	1	-0.0109	0.5653	0.6985	0.6319	0.6319	0.0147	BRD-K71106091	fludarabine-phosphate
CTSL	HA1E	0.0285321	0.919641	0.891678	0.891678	0.161189	0.0294	-0.243	0.1959	0.1959	0.1959	-0.6345	BRD-K09602097	forskolin
CTSL	A375	0.0285505	0.433657	0.100659	0.100659	0.114419	0.0424	0.4923	0.3414	0.4507	0.4507	0.5339	BRD-K31385749	ivabradine
CTSL	PC3	0.0285793	0.0857054	0.0855588	0.0855588	0.27989	-0.0109	0.7341	1.02485	0.75715	0.75715	0.60975	BRD-K88429204	pyrimethamine
CTSL	HT29	0.0286309	0.732523	0.0869728	0.0869728	0.0969176	-0.0918	0.3326	0.10815	0.4192	0.4192	0.36165	BRD-K12787259	CX-5461
CTSL	HA1E	0.0286845	0.59449	0.622204	0.622204	0.0670704	0.0294	-0.3448	0.6127	-0.0994	-0.0994	-0.5782	BRD-K45117373	Y-26763
CTSL	A375	0.0289141	0.464172	0.0304906	0.0304906	0.0871851	0.0424	0.573	0.5815	0.5815	0.5815	0.7071	BRD-A64977602	mirtazapine
CTSL	PC3	0.0290778	0.43005	0.108683	0.108683	0.751364	-0.0109	-0.5532	-0.0209	-0.4754	-0.4754	-0.2159	BRD-A29009894	AZD-1480
CTSL	A375	0.0291441	0.141481	0.0342349	0.0342349	0.554084	0.0424	-0.283	-0.39875	-0.3162	-0.3162	-0.258	BRD-K76908866	CP-724714
CTSL	HT29	0.0291959	0.956264	0.130854	0.130854	0.0370262	-0.0918	-0.6918	0.2603	-0.8071	-0.8071	-1.3591	BRD-K17930269	retapamulin
CTSL	PC3	0.0292193	0.106845	0.165811	0.165811	0.0851314	-0.0109	-1.37135	-1.7522	-1.7039	-1.7039	-2.8149	BRD-K76674262	homoharringtonine
CTSL	HA1E	0.0292216	0.111821	0.273586	0.081686	0.030631	0.0294	-0.40675	-0.6324	-0.4283	-0.53035	-0.51975	BRD-K64874225	NSC-4644
CTSL	A375	0.0292817	0.273279	0.104343	0.104343	0.81407	0.0424	0.89815	-0.3593	0.8048	0.8048	-0.1982	BRD-K22749967	ABT-239
CTSL	MCF7	0.0293183	0.197667	0.135423	0.135423	0.357488	-0.0333	-0.5227	-0.4452	-0.4452	-0.4452	-0.0877	BRD-K17953908	LY-2886721
CTSL	HA1E	0.0293702	0.866729	0.0858202	0.0858202	0.8167	0.0294	-0.5969	0.6871	-0.5694	-0.5694	-0.0206	BRD-K92441787	bexarotene
CTSL	A549	0.0295115	0.160238	0.0123837	0.0123837	0.480002	0.02615	-0.5017	-0.64385	-0.7752	-0.7752	0.3872	BRD-K17588104	JQ1-(-)
CTSL	PC3	0.0296217	0.990829	0.0137793	0.0137793	0.359907	-0.0109	0.8204	-0.0933	0.891	0.891	0.8325	BRD-K26325692	API-001
CTSL	HT29	0.0296657	0.0163601	0.0352678	0.0352678	0.615661	-0.0918	0.25505	0.96045	0.31145	0.31145	0.1223	BRD-K64800655	PHA-793887
CTSL	MCF7	0.0296883	0.660421	0.424029	0.424029	0.717539	-0.0333	0.40275	0.2955	0.2955	0.2955	-0.0446	BRD-U70626184	BI-2536
CTSL	PC3	0.0298355	0.348999	0.841076	0.841076	0.324866	-0.0109	-0.41595	-0.1903	-0.1203	-0.1203	-0.6915	BRD-K32847255	GSK-J1
CTSL	PC3	0.0299276	0.71674	0.954969	0.954969	0.0799243	-0.0109	0.60165	0.0179	0.1005	0.1005	1.0022	BRD-K17075857	chloroxine
CTSL	MCF7	0.029951	0.225513	0.0442042	0.0442042	0.367472	-0.0333	-0.41215	-0.7232	-0.6644	-0.6644	-0.3091	BRD-A88138582	halcinonide
CTSL	A375	0.030029	0.263952	0.0735057	0.0735057	0.324235	0.0424	-0.2795	-0.3467	-0.3352	-0.3352	-0.0232	BRD-K20079257	rufinamide
CTSL	PC3	0.030097	0.143667	0.585299	0.585299	0.424522	-0.0109	0.4294	0.9807	0.1385	0.1385	0.2972	BRD-K43457670	acetazolamide
CTSL	PC3	0.0301124	0.846252	0.330167	0.330167	0.03418	-0.0109	0.3894	-0.3084	0.2713	0.2713	0.9665	BRD-K85307935	novobiocin
CTSL	A375	0.0301349	0.196013	0.00252471	0.00252471	0.481086	0.0424	0.36535	1.4013	1.4013	1.4013	0.0933	BRD-K95237249	probenecid
CTSL	A549	0.0301695	0.0301695	NA	0.0301695	0.0301695	0.02615	-1.3951	-1.3951	NA	-1.3951	-1.3951	BRD-A13254067	okadaic acid
CTSL	HA1E	0.0301836	0.693438	0.289428	0.289428	0.880687	0.0294	-0.4524	-0.4721	-0.2276	-0.2276	-0.347	BRD-M80207679	nemonapride
CTSL	MCF7	0.0302402	0.593303	0.270388	0.270388	0.227765	-0.0333	0.20735	0.0702	0.1117	0.1117	0.686	BRD-K60997853	PHA-848125
CTSL	HT29	0.0303296	0.869317	0.549173	0.549173	0.424914	-0.0918	0.506	0.1608	0.1608	0.1608	0.6494	BRD-K23190681	AV-412
CTSL	MCF7	0.0304023	NA	NA	NA	NA	-0.0333	-0.9443	NA	NA	NA	NA	BRD-A61304759	tanespimycin
CTSL	HT29	0.0304527	0.462532	0.190603	0.190603	0.124764	-0.0918	0.58195	-0.6025	0.4937	0.4937	0.6702	BRD-K03390685	cobimetinib
CTSL	PC3	0.0304851	0.442715	0.183182	0.183182	0.0600998	-0.0109	-0.62945	-0.5872	-0.6717	-0.6717	-1.292	BRD-K06900071	tebipenem
CTSL	HEPG2	0.0305456	0.806745	0.033858	0.033858	0.753126	-0.17825	0.13155	-0.2793	0.7596	0.7596	-0.3473	BRD-K86797399	SB-939
CTSL	A375	0.0305771	0.529281	0.0661071	0.0661071	0.354437	0.0424	0.74415	0.4826	1.1397	1.1397	0.4218	BRD-K47780086	penciclovir
CTSL	MCF7	0.0306662	0.708122	0.204765	0.204765	0.104222	-0.0333	0.594	0.542	0.542	0.542	0.6688	BRD-K97101532	VX-661
CTSL	HT29	0.0306692	0.325751	0.575106	0.575106	0.49817	-0.0918	0.26985	0.534	-0.1048	-0.1048	0.0057	BRD-K95412502	istaroxime
CTSL	HEPG2	0.0307116	0.376469	0.482604	0.482604	0.271559	-0.17825	0.1776	0.0162	0.0139	0.0139	0.2633	BRD-K29395450	PIK-93
CTSL	MCF7	0.0307629	0.688094	0.370982	0.370982	0.119671	-0.0333	-0.4898	0.1292	0.1135	0.1135	-0.555	BRD-A97701745	pindolol
CTSL	A549	0.0308094	0.504975	0.473845	0.473845	0.711213	0.02615	0.2199	-0.2468	-0.1982	-0.1982	0.0036	BRD-A25736793	everolimus
CTSL	HT29	0.0308871	0.449395	0.0114384	0.0114384	0.680661	-0.0918	0.4424	1.0766	1.2593	1.2593	0.1538	BRD-K72222507	quinapril
CTSL	A375	0.0309116	0.388341	0.818532	0.818532	0.0446603	0.0424	0.5688	0.6745	0.268	0.268	1.1268	BRD-K63675182	triflupromazine
CTSL	PC3	0.0309248	0.298581	0.314949	0.314949	0.295341	-0.0109	0.402	0.5083	0.3315	0.3315	0.2737	BRD-K82484347	GSK-J2
CTSL	A375	0.0309472	0.155924	0.185818	0.185818	0.0233587	0.0424	-0.4989	-0.3926	-0.3926	-0.3926	-0.9698	BRD-A69951442	dexamethasone
CTSL	A375	0.0309774	0.162454	0.213639	0.213639	0.00400202	0.0424	-0.75705	-1.6873	-0.8355	-0.8355	-2.3219	BRD-K37890730	camptothecin
CTSL	HT29	0.0310322	0.471496	0.187168	0.187168	0.297413	-0.0918	-0.57055	-0.6174	-0.6174	-0.6174	-0.5237	BRD-K58736316	cianidanol
CTSL	A375	0.0311493	0.137918	0.667058	0.667058	0.959361	0.0424	-0.6076	-0.4494	-0.2391	-0.2391	-0.2419	BRD-K17203476	LY-2874455
CTSL	MCF7	0.0311511	0.435725	0.105856	0.105856	0.430432	-0.0333	-0.70345	-0.9136	-0.6608	-0.6608	-0.2477	BRD-K58435339	AT-13387
CTSL	HT29	0.0311807	0.121124	0.0859359	0.0859359	0.568162	-0.0918	0.6846	0.8124	0.6842	0.6842	0.9139	BRD-K32821942	azathioprine
CTSL	HA1E	0.0312668	0.715361	0.153152	0.153152	0.335502	0.0294	-0.48615	0.3839	-0.3352	-0.3352	-1.4491	BRD-K10845183	tiludronate
CTSL	PC3	0.0312901	0.373705	0.0757581	0.0757581	0.728721	-0.0109	-0.51745	-1.3055	-1.0832	-1.0832	0.3382	BRD-K07667918	linsitinib
CTSL	A375	0.0313056	0.0249588	0.00954559	0.00954559	0.121324	0.0424	-0.6097	-0.9518	-0.9518	-0.9518	-1.1248	BRD-K53814070	ripasudil
CTSL	PC3	0.031338	0.0637286	0.270344	0.270344	0.554718	-0.0109	0.55925	0.7274	0.5279	0.5279	-0.1109	BRD-K13646352	midostaurin
CTSL	MCF7	0.0313815	0.0713351	0.0566786	0.0566786	0.629355	-0.0333	-0.5109	-1.0218	-0.5832	-0.5832	0.3317	BRD-K11196887	norfloxacin
CTSL	A549	0.0314007	NA	NA	NA	NA	0.02615	1.1923	NA	NA	NA	NA	BRD-K65592642	semagacestat
CTSL	HA1E	0.0314084	0.412564	0.033398	0.033398	0.979191	0.0294	0.57095	0.5246	0.6173	0.6173	-0.0773	BRD-K66989831	anacardic-acid
CTSL	A549	0.0314251	0.846409	0.155301	0.336746	0.825874	0.02615	0.28995	-0.15955	-0.505	-0.4128	-0.15955	BRD-K81418486	vorinostat
CTSL	A375	0.0314625	0.120619	0.0941009	0.0941009	0.419409	0.0424	0.32705	0.8941	0.2989	0.2989	-0.5222	BRD-K31928526	barasertib
CTSL	PC3	0.0315303	0.263165	0.0872894	0.0872894	0.186222	-0.0109	-0.4705	-0.4703	-0.4703	-0.4703	-1.3697	BRD-K07859598	GW-5074
CTSL	HA1E	0.0315665	0.662462	0.326977	0.326977	0.0618152	0.0294	-0.363	-0.266	-0.266	-0.266	-1.0506	BRD-K59506194	targinine
CTSL	A375	0.0315814	0.823971	0.65172	0.65172	0.187276	0.0424	0.539	-0.1819	-0.0559	-0.0559	0.81535	BRD-K96194081	cepharanthine
CTSL	HA1E	0.0316022	0.2285	0.678507	0.678507	0.0123333	0.0294	-0.5063	0.2294	0.1241	0.1241	-1.2962	BRD-A24396574	celastrol
CTSL	HA1E	0.0316299	0.0961367	0.410321	0.410321	0.0464111	0.0294	-0.61745	-1.5177	-0.0563	-0.0563	-1.6776	BRD-K60219430	serdemetan
CTSL	MCF7	0.0317308	0.319231	0.255257	0.255257	0.910417	-0.0333	0.25335	0.28495	0.1846	0.1846	-0.0145	BRD-K54256913	MK-1775
CTSL	HA1E	0.0317503	0.542608	0.751343	0.751343	0.238338	0.0294	-0.5308	0.58005	0.3199	0.3199	-0.6392	BRD-K99964838	bosutinib
CTSL	PC3	0.0318524	0.183079	0.0111437	0.0111437	0.718982	-0.0109	-0.6342	-0.6299	-0.6442	-0.6442	-0.7389	BRD-K89704198	vincamine
CTSL	A375	0.0319054	0.0250858	0.00513196	0.00513196	0.864228	0.0424	-0.4483	-1.2762	-1.2762	-1.2762	0.0362	BRD-K60997853	PHA-848125
CTSL	A375	0.0319213	0.0436288	0.0763202	0.0763202	0.301455	0.0424	-0.38255	-0.8987	-0.5193	-0.5193	-0.2458	BRD-A26503646	formestane
CTSL	MCF7	0.0319787	0.654875	0.0753041	0.0753041	0.614695	-0.0333	-0.57225	-0.5431	-0.8779	-0.8779	-0.6014	BRD-K04111260	raclopride
CTSL	MCF7	0.0319934	0.376654	0.0588039	0.0588039	0.991363	-0.0333	0.392	0.0918	0.4583	0.4583	0.3096	BRD-A18043272	phensuximide
CTSL	A375	0.0320059	0.401074	0.170192	0.170192	0.121795	0.0424	-0.4941	-0.3988	-0.2772	-0.2772	-0.7805	BRD-K68174511	torin-2
CTSL	A375	0.0320489	0.0756372	0.165304	0.165304	0.708161	0.0424	-0.7654	-0.9216	-0.8735	-0.8735	-0.1649	BRD-K72922393	linsidomine
CTSL	HT29	0.0321424	0.609039	0.355919	0.355919	0.266922	-0.0918	0.3933	0.64495	0.15005	0.15005	1.5061	BRD-K42495768	tasisulam
CTSL	HEPG2	0.0321536	0.0671495	0.0743333	0.0743333	0.819259	-0.17825	0.24865	0.6745	0.2661	0.2661	-0.8964	BRD-K50000283	PHA-767491
CTSL	HT29	0.0321736	0.907176	0.391571	0.391571	0.935027	-0.0918	0.32115	-0.1608	0.2546	0.2546	-0.1604	BRD-K70914287	BIBX-1382
CTSL	A375	0.0322251	0.788695	0.207953	0.207953	0.416873	0.0424	-0.2829	0.1893	-0.2884	-0.2884	-0.0033	BRD-A61676498	climbazole
CTSL	MCF7	0.0322883	0.629676	0.727276	0.727276	0.542271	-0.0333	0.3531	-0.1269	0.1287	0.1287	0.1682	BRD-K21283037	riluzole
CTSL	HA1E	0.0323224	0.187742	0.0206775	0.0206775	0.371286	0.0294	-0.4533	-0.86005	-0.476	-0.476	-0.45905	BRD-K73196317	urapidil
CTSL	A549	0.0323329	0.210882	0.126021	0.0955869	0.156914	0.02615	-0.3948	-0.3456	-0.4542	-0.4113	-0.3948	BRD-K83189926	UNC-1215
CTSL	MCF7	0.0323921	0.643517	0.255204	0.255204	0.213823	-0.0333	-0.52735	-0.1166	-0.3362	-0.3362	-0.533	BRD-K05673000	dicloxacillin
CTSL	A375	0.032402	0.111304	0.566376	0.566376	0.168733	0.0424	-0.5282	1.517	-0.0932	-0.0932	-1.3284	BRD-K93747373	HG-5-113-01
CTSL	MCF7	0.0324664	0.728354	0.271293	0.271293	0.863907	-0.0333	-0.60725	0.0578	-0.5041	-0.5041	0.0787	BRD-K97181089	amiloride
CTSL	HA1E	0.0324884	0.565757	0.206051	0.206051	0.0559116	0.0294	0.5869	0.3244	0.3244	0.3244	1.22755	BRD-A97674275	ranolazine
CTSL	HA1E	0.0325129	0.180066	0.041024	0.041024	0.594052	0.0294	0.55275	0.7522	0.7522	0.7522	0.2584	BRD-K95763993	trapidil
CTSL	MCF7	0.0325707	0.117224	0.238235	0.238235	0.609947	-0.0333	-0.62525	-1.3278	-0.3469	-0.3469	-0.4701	BRD-K74190368	resorcinol
CTSL	A375	0.0326285	0.225642	0.466845	0.466845	0.618628	0.0424	0.3917	0.5592	0.2203	0.2203	0.495	BRD-K50564936	E-2012
CTSL	A375	0.0326353	0.103395	0.227984	0.227984	0.0451836	0.0424	-0.5533	-0.5533	-0.3483	-0.3483	-0.9662	BRD-K31135544	IB-MECA
CTSL	HCC515	0.0327086	0.618035	0.613399	0.613399	0.510831	-0.1524	0.40175	-0.3399	-0.0932	-0.0932	-0.0917	BRD-A13021932	BMS-509744
CTSL	PC3	0.0328051	0.0666415	0.0544717	0.0544717	0.581822	-0.0109	-0.4156	-0.8148	-0.4257	-0.4257	-0.09	BRD-K19456237	piracetam
CTSL	A375	0.0328073	0.109338	0.447361	0.447361	0.488744	0.0424	0.41225	-0.7709	0.2844	0.2844	0.2572	BRD-K69236721	lumacaftor
CTSL	PC3	0.0329333	0.155684	0.0174301	0.0174301	0.578701	-0.0109	-0.59425	-1.0255	-0.7631	-0.7631	0.4562	BRD-K87156652	carbimazole
CTSL	PC3	0.0329884	0.139338	0.113265	0.113265	0.0498766	-0.0109	0.51845	0.706	0.6249	0.6249	1.1453	BRD-K32285926	AMG-208
CTSL	A375	0.0330034	0.384212	0.197246	0.197246	0.279331	0.0424	0.50535	0.7027	0.4025	0.4025	0.4662	BRD-A44090213	indoprofen
CTSL	HEPG2	0.0330286	0.592682	0.326685	0.326685	0.0655593	-0.17825	0.23595	-0.8651	-0.1035	-0.1035	0.9802	BRD-K64890080	BI-2536
CTSL	HA1E	0.0330363	0.780071	0.0415568	0.0330363	0.502996	0.0294	0.3932	0.25665	0.6922	0.3932	0.2692	BRD-K92301463	16,16-dimethylprostaglandin-e2
CTSL	MCF7	0.0330964	0.253794	0.0417689	0.0417689	0.209533	-0.0333	-0.53745	-0.5364	-0.5673	-0.5673	-0.4676	BRD-K84011460	nizofenone
CTSL	A375	0.0331347	0.364455	0.0124565	0.0124565	0.577473	0.0424	0.5426	0.5412	0.629	0.629	-0.59	BRD-K07881437	danusertib
CTSL	HT29	0.0332058	0.972411	0.238205	0.238205	0.00997824	-0.0918	0.2994	0.2332	0.2332	0.2332	1.4679	BRD-A41451487	PK-11195
CTSL	MCF7	0.0332264	0.502682	0.0509995	0.0509995	0.205791	-0.0333	-0.3665	-0.289	-0.5815	-0.5815	-0.3665	BRD-K46604138	dapagliflozin
CTSL	HT29	0.033239	0.212565	0.0610618	0.0610618	0.227807	-0.0918	-0.55945	-1.2601	-1.1725	-1.1725	-0.332	BRD-K34888156	theobromine
CTSL	PC3	0.0332902	0.469288	0.311906	0.311906	0.103274	-0.0109	0.3358	0.0971	0.1831	0.1831	1.2924	BRD-K17498618	atracurium
CTSL	A375	0.0333655	0.204097	0.0774514	0.0774514	0.153651	0.0424	-0.5482	-0.7929	-0.7929	-0.7929	-0.4008	BRD-K02992638	lamivudine
CTSL	HA1E	0.0335169	0.875642	0.143674	0.143674	0.344468	0.0294	0.5358	-0.2938	0.5905	0.5905	0.677	BRD-K54472332	elvitegravir
CTSL	HEPG2	0.0335634	0.244426	0.105606	0.105606	0.337211	-0.17825	0.2946	0.4446	0.219	0.219	0.7498	BRD-K83452553	daminozide
CTSL	HT29	0.0335896	0.630356	0.216821	0.216821	0.156051	-0.0918	0.37565	-0.4925	0.1519	0.1519	0.6274	BRD-K61036791	rucinol
CTSL	HA1E	0.0336839	0.490528	0.190328	0.190328	0.333038	0.0294	0.4801	0.4998	0.2887	0.2887	0.5023	BRD-K49111258	prazosin
CTSL	A375	0.0337644	0.461187	0.603055	0.603055	0.0110564	0.0424	0.41555	-0.2987	-0.1643	-0.1643	2.3358	BRD-A24560335	efatutazone
CTSL	PC3	0.0338155	0.0939022	0.165996	0.165996	0.131236	-0.0109	-0.41415	-0.6535	-0.2905	-0.2905	-0.7409	BRD-K78692225	leflunomide
CTSL	HA1E	0.0338349	0.979191	0.339162	0.339162	0.251321	0.0294	-0.4171	0.2265	-0.3179	-0.3179	-0.4428	BRD-A62025033	temsirolimus
CTSL	PC3	0.0338497	0.0252287	0.153011	0.153011	0.107137	-0.0109	-0.67195	-1.2369	-0.5705	-0.5705	-0.7734	BRD-K21025364	NVP-TAE226
CTSL	HT29	0.0339095	0.280124	0.0970303	0.0970303	0.0859075	-0.0918	0.4251	0.6416	0.6416	0.6416	0.996	BRD-A37704979	SB-203580
CTSL	PC3	0.0339694	0.563459	0.496923	0.496923	0.0288223	-0.0109	-0.5391	-0.2665	-0.3033	-0.3033	-0.9447	BRD-K25114078	aminoguanidine
CTSL	HA1E	0.0339696	0.0912238	0.148395	0.148395	0.312335	0.0294	-0.688	-1.433	-0.6666	-0.6666	-1.0045	BRD-K94293891	suvorexant
CTSL	A375	0.0339759	0.224176	0.213723	0.213723	0.294029	0.0424	0.317	-0.17235	0.29635	0.29635	0.3036	BRD-K19540840	saracatinib
CTSL	MCF7	0.0340144	0.23981	0.484187	0.484187	0.0153126	-0.0333	0.3784	0.6429	-0.1146	-0.1146	1.1427	BRD-K12867552	PCI-24781
CTSL	MCF7	0.0340454	0.254546	0.0590829	0.0590829	0.419437	-0.0333	-0.27715	-0.7592	-0.7278	-0.7278	-0.1211	BRD-K33106058	cytarabine
CTSL	A549	0.0340755	0.108246	0.19044	0.19044	0.756363	0.02615	0.17435	0.63725	0.12305	0.12305	-0.00625	BRD-K67578145	GDC-0879
CTSL	A375	0.0342098	NA	0.0342098	0.0342098	NA	0.0424	1.0458	NA	1.0458	1.0458	NA	BRD-A55453956	compound e
CTSL	PC3	0.0342616	0.0830718	0.196213	0.196213	0.68049	-0.0109	0.6544	0.9705	0.2789	0.2789	0.5079	BRD-K86930074	cediranib
CTSL	HA1E	0.0342914	0.18902	0.0111644	0.0111644	0.402533	0.0294	0.5969	0.8182	0.8006	0.8006	0.6248	BRD-K27938825	ASA-404
CTSL	PC3	0.0342961	0.0845025	0.0270443	0.0270443	0.0531089	-0.0109	0.4273	0.8608	0.8608	0.8608	1.0802	BRD-K25140590	CX-516
CTSL	A375	0.0344121	0.0452889	0.0111604	0.0111604	0.921161	0.0424	-0.5433	-0.6495	-0.6495	-0.6495	0.0372	BRD-K85751432	refametinib
CTSL	HT29	0.0344714	0.294673	0.0722908	0.0722908	0.621605	-0.0918	0.34735	1.3444	0.913	0.913	-0.1742	BRD-A10012892	argatroban
CTSL	HT29	0.0345228	0.800296	0.184688	0.184688	0.275095	-0.0918	0.42645	-0.5169	0.5808	0.5808	0.2721	BRD-A96292436	eflornithine
CTSL	HA1E	0.0345608	0.737204	0.032367	0.032367	0.0830808	0.0294	-0.36045	-0.1705	-0.4653	-0.4653	-0.54065	BRD-K56301217	ABT-737
CTSL	A549	0.0346119	0.0559731	0.0145273	0.0145273	0.448323	0.02615	-0.21135	-0.5774	-0.41375	-0.41375	-0.637	BRD-K26838195	AST-1306
CTSL	A375	0.0348787	0.0343644	0.356748	0.356748	0.330551	0.0424	-0.6172	-1.4277	-0.2596	-0.2596	-0.6785	BRD-K88510285	bortezomib
CTSL	PC3	0.0350333	0.194854	0.24539	0.24539	0.457101	-0.0109	0.3964	0.3964	0.3515	0.3515	0.3991	BRD-K42495768	tasisulam
CTSL	HA1E	0.0351332	0.442363	0.112687	0.112687	0.447643	0.0294	-0.3147	-0.4802	-0.6141	-0.6141	0.0024	BRD-K72827473	CEP-37440
CTSL	PC3	0.0351511	0.967312	0.507014	0.507014	0.207176	-0.0109	0.44755	-0.2322	0.4373	0.4373	1.2841	BRD-K97799481	theophylline
CTSL	HT29	0.0353553	0.665514	0.0511479	0.0511479	0.845269	-0.0918	0.40005	0.3713	0.5407	0.5407	0.0341	BRD-A78341343	regadenoson
CTSL	HEPG2	0.0353997	0.0231144	0.111711	0.111711	0.661257	-0.17825	0.4091	0.798	0.2014	0.2014	0.1948	BRD-K43002773	GDC-0068
CTSL	PC3	0.0354165	0.926735	0.235694	0.235694	0.0465903	-0.0109	-0.55615	0.413	-0.4368	-0.4368	-1.5741	BRD-K97729603	pimecrolimus
CTSL	HA1E	0.0354293	0.4199	0.687879	0.687879	0.0076346	0.0294	-0.4503	-0.303	-0.303	-0.303	-1.9199	BRD-K68164687	epothilone-b
CTSL	PC3	0.0354875	0.155232	0.056343	0.056343	0.52303	-0.0109	0.58	0.6631	0.6083	0.6083	0.8782	BRD-K00603606	ticlopidine
CTSL	HA1E	0.0355214	0.0357955	0.0336505	0.0336505	0.0928452	0.0294	-0.259	-0.94795	-0.5388	-0.5388	-0.48045	BRD-K99749624	linifanib
CTSL	HT29	0.035563	0.0346731	0.000994839	0.000994839	0.178191	-0.0918	-0.8265	-1.1066	-1.4325	-1.4325	1.038	BRD-K52020312	metronidazole
CTSL	MCF7	0.0356075	0.374224	0.00523261	0.00523261	0.0748002	-0.0333	0.7103	0.7989	0.7989	0.7989	0.7103	BRD-K88510285	bortezomib
CTSL	PC3	0.0356108	0.770398	0.230262	0.230262	0.0254033	-0.0109	0.5928	0.4328	0.5928	0.5928	1.78565	BRD-A86248581	tetrahydrouridine
CTSL	MCF7	0.0356734	0.241256	0.194734	0.194734	0.20146	-0.0333	-0.3844	-0.2955	-0.3124	-0.3124	-0.3884	BRD-K12609457	exalamide
CTSL	MCF7	0.035683	0.274628	0.561421	0.561421	0.286976	-0.0333	-0.42635	0.5516	-0.244	-0.244	-0.753	BRD-K04993719	LY-2334737
CTSL	HCC515	0.0357761	0.784103	0.117374	0.117374	0.392658	-0.1524	0.84275	0.008	0.8386	0.8386	0.926	BRD-K50168500	canertinib
CTSL	HCC515	0.0357761	0.982513	0.845737	0.845737	0.240948	-0.1524	0.40965	0.0513	-0.3289	-0.3289	0.4704	BRD-K68407802	KIN001-055
CTSL	A375	0.036138	0.423938	0.0463178	0.0463178	0.491825	0.0424	-0.48705	-0.5077	-0.5077	-0.5077	-0.966	BRD-K69932463	AZD-8055
CTSL	HT29	0.0361691	0.114892	0.103204	0.103204	0.860769	-0.0918	0.4218	0.4277	0.4159	0.4159	0.0282	BRD-A52922642	gallopamil
CTSL	A375	0.0361734	0.438274	0.69293	0.69293	0.313531	0.0424	0.5806	0.5655	0.3186	0.3186	0.8043	BRD-K34415467	trimethobenzamide
CTSL	HT29	0.036287	0.598073	0.456201	0.456201	0.77029	-0.0918	0.561	0.6401	-0.9284	-0.9284	-0.5783	BRD-K81418486	vorinostat
CTSL	MCF7	0.0364053	0.762492	0.0824337	0.0824337	0.946057	-0.0333	0.6199	-0.1295	0.6695	0.6695	0.2052	BRD-K86930074	cediranib
CTSL	HEPG2	0.0365421	0.15191	0.206185	0.206185	0.11334	-0.17825	-0.6536	-0.7859	-0.6388	-0.6388	-0.9552	BRD-K79404599	enzastaurin
CTSL	MCF7	0.0366191	0.372529	0.298817	0.298817	0.110321	-0.0333	0.51735	0.3292	0.3292	0.3292	0.6106	BRD-K80535353	enoxolone
CTSL	HT29	0.0366361	0.798387	0.765537	0.765537	0.0449165	-0.0918	-0.59435	-0.0629	-0.0629	-0.0629	-1.2099	BRD-A68739437	NPK76-II-72-1
CTSL	PC3	0.0367083	0.0304469	0.0493742	0.0493742	0.666359	-0.0109	-0.39695	-0.93745	-0.43905	-0.43905	-0.3733	BRD-K93918653	quizartinib
CTSL	MCF7	0.0367409	0.123803	0.333104	0.333104	0.516254	-0.0333	-0.29305	-0.50195	-0.3658	-0.3658	-0.3	BRD-K19687926	lapatinib
CTSL	HA1E	0.0367794	0.148768	0.87779	0.87779	0.0870584	0.0294	-0.3882	0.6488	0.1302	0.1302	-0.4616	BRD-K31342827	bisindolylmaleimide
CTSL	HT29	0.0368897	0.525183	0.194492	0.194492	0.0966006	-0.0918	0.5626	-0.1268	0.4516	0.4516	0.6736	BRD-K70642949	GSK-2334470
CTSL	MCF7	0.0369168	0.27344	0.0907939	0.0907939	0.101369	-0.0333	0.5775	1.3781	1.1243	1.1243	0.8858	BRD-K51040301	cobicistat
CTSL	HEPG2	0.0369298	0.128803	0.126274	0.126274	0.127455	-0.17825	-0.58375	-1.114	-0.569	-0.569	-1.0294	BRD-A29009894	AZD-1480
CTSL	MCF7	0.0369334	0.95935	0.636353	0.636353	0.296182	-0.0333	0.54755	-0.3485	-0.2327	-0.2327	0.1613	BRD-A23067620	itraconazole
CTSL	MCF7	0.0370166	0.501533	0.149868	0.149868	0.125906	-0.0333	0.4334	0.9432	0.5761	0.5761	0.7803	BRD-K69001009	golvatinib
CTSL	HA1E	0.0370873	0.244872	0.00177416	0.00177416	0.978406	0.0294	-0.58575	-0.7145	-0.758	-0.758	0.5775	BRD-A24514565	warfarin
CTSL	HT29	0.0371996	0.991328	0.1318	0.1318	0.381036	-0.0918	0.5013	-0.2562	1.0769	1.0769	0.2993	BRD-A96754982	tacrolimus
CTSL	MCF7	0.0372334	0.18036	0.0320743	0.0320743	0.801977	-0.0333	-0.445	-0.445	-0.445	-0.445	-0.0373	BRD-A37780065	triamcinolone
CTSL	A375	0.0372695	0.207256	0.242158	0.242158	0.807232	0.0424	-0.4919	-0.4973	-0.36935	-0.36935	0.2808	BRD-A33692381	zidovudine
CTSL	A375	0.0373589	0.455841	0.0359939	0.0359939	0.0575553	0.0424	-0.4924	-0.0457	-0.8082	-0.8082	-0.6674	BRD-K47869605	podophyllotoxin
CTSL	A549	0.0373684	0.629568	0.758279	0.758279	0.229588	0.02615	-0.5574	-0.6811	-0.4732	-0.4732	-0.6416	BRD-U22633929	XMD11-85H
CTSL	MCF7	0.0373837	0.899497	0.917148	0.917148	0.168068	-0.0333	0.4908	-0.1268	0.0473	0.0473	0.7441	BRD-K15502390	nevirapine
CTSL	MCF7	0.0374009	0.960428	0.170026	0.170026	0.533637	-0.0333	0.21425	-0.1868	0.3724	0.3724	-0.0884	BRD-K12539416	sulbutiamine
CTSL	HA1E	0.0374935	0.0495732	0.00718981	0.00718981	0.102117	0.0294	0.4734	0.99075	0.7448	0.7448	0.73825	BRD-K09132007	D-4476
CTSL	A549	0.0375328	0.213112	0.00710484	0.02979	0.292681	0.02615	-0.4173	-0.4772	-0.67905	-0.4772	0.2749	BRD-K08109215	I-BET-762
CTSL	A375	0.0376146	0.156497	0.0128287	0.0128287	0.827024	0.0424	-0.4462	-0.7738	-0.6862	-0.6862	0.0711	BRD-K58010567	vilazodone
CTSL	PC3	0.0376201	0.0737588	0.0312306	0.0312306	0.837262	-0.0109	0.4257	0.9056	0.8263	0.8263	0.0796	BRD-A87983072	benzotript
CTSL	HT29	0.037641	0.0694904	0.247978	0.247978	0.449395	-0.0918	0.4999	0.6702	0.2971	0.2971	-0.6792	BRD-K02389548	RG-2833
CTSL	HCC515	0.0376685	0.486491	0.624461	0.624461	0.0612656	-0.1524	0.5473	0.3074	0.2898	0.2898	1.0332	BRD-K83972459	JWE-035
CTSL	A375	0.037743	0.0723104	0.00935914	0.00935914	0.350378	0.0424	-0.3149	-1.152	-0.8134	-0.8134	-0.6291	BRD-K97746869	chlorpropamide
CTSL	PC3	0.0377886	0.101384	0.074719	0.074719	0.370492	-0.0109	0.43195	0.8236	0.3901	0.3901	1.0548	BRD-A78877355	nefopam
CTSL	A375	0.0377982	0.52512	0.0802416	0.0802416	0.265631	0.0424	-0.39335	0.1651	-0.7172	-0.7172	-1.2315	BRD-K17953908	LY-2886721
CTSL	PC3	0.0379013	0.410742	0.110859	0.110859	0.591453	-0.0109	-0.44245	-0.128	-0.6691	-0.6691	-0.2158	BRD-K19416115	sitagliptin
CTSL	A375	0.0379101	0.430212	0.149047	0.149047	0.114644	0.0424	0.7836	1.101	0.8793	0.8793	1.3404	BRD-K30020243	aliskiren
CTSL	A549	0.0380211	0.494133	0.176828	0.176828	0.763906	0.02615	0.34425	0.1705	0.3266	0.3266	0.0031	BRD-K81528515	nilotinib
CTSL	HT29	0.0380308	0.0553011	0.033198	0.033198	0.752221	-0.0918	0.6007	0.8297	0.794	0.794	-0.3379	BRD-A22769835	homochlorcyclizine
CTSL	MCF7	0.0380605	0.241618	0.177847	0.177847	0.382034	-0.0333	-0.31455	-0.8264	-0.2701	-0.2701	-0.6767	BRD-K67102207	phenylbutyrate
CTSL	A375	0.0380621	0.792168	0.457192	0.457192	0.300768	0.0424	-0.3118	0.1798	0.1798	0.1798	-0.4051	BRD-K62391742	venetoclax
CTSL	HEPG2	0.038114	0.7328	0.663021	0.663021	0.313416	-0.17825	0.3172	-0.2159	-0.2159	-0.2159	0.3978	BRD-K55591206	epigallocatechin-gallate-(-)
CTSL	MCF7	0.0382312	0.253044	0.0105266	0.0105266	0.451287	-0.0333	0.34555	0.8414	0.8414	0.8414	0.1419	BRD-K50163129	acrivastine
CTSL	MCF7	0.0382654	0.834925	0.192506	0.192506	0.0850428	-0.0333	0.30705	-0.049	0.2092	0.2092	1.4819	BRD-K35189033	levonorgestrel
CTSL	HA1E	0.0383598	0.0946702	0.825305	0.825305	0.648953	0.0294	0.6281	-1.4303	0.1836	0.1836	-0.0365	BRD-K05870596	XMD-1499
CTSL	MCF7	0.0383792	0.220885	0.0935071	0.0935071	0.395724	-0.0333	0.4627	0.4686	0.4686	0.4686	0.4074	BRD-K46424862	hymecromone
CTSL	HA1E	0.0384347	0.159139	0.0553777	0.0553777	0.29476	0.0294	0.65985	1.0211	0.6754	0.6754	-0.4792	BRD-K64838454	dipraglurant
CTSL	HT29	0.0384616	0.12586	0.318256	0.318256	0.141867	-0.0918	0.59005	-0.6258	0.6233	0.6233	0.5859	BRD-K77685957	dequalinium
CTSL	A375	0.0384839	0.795113	0.0904409	0.0904409	0.971859	0.0424	0.5896	0.2035	0.4692	0.4692	-0.129	BRD-K06294530	UK-383367
CTSL	PC3	0.0385095	0.875417	0.0632813	0.0632813	0.430198	-0.0109	0.3976	0.03575	0.3976	0.3976	0.3363	BRD-K11267252	alectinib
CTSL	PC3	0.0385628	0.749288	0.252003	0.252003	0.892374	-0.0109	-0.678	-0.2315	-0.9169	-0.9169	-0.07165	BRD-A84045418	calpeptin
CTSL	MCF7	0.0385745	0.847623	0.77502	0.77502	0.148149	-0.0333	0.5425	-0.2151	-0.2151	-0.2151	0.7088	BRD-K14619660	altrenogest
CTSL	HT29	0.0386042	0.757102	0.240766	0.240766	0.418633	-0.0918	0.2402	0.0647	0.19515	0.19515	1.3907	BRD-K76841105	tazarotene
CTSL	HEPG2	0.0386615	0.57057	0.372924	0.372924	0.912238	-0.17825	0.4891	0.5575	0.5575	0.5575	0.2946	BRD-K78431006	crizotinib
CTSL	HA1E	0.0387087	0.164003	0.0447526	0.0447526	0.317548	0.0294	0.602	0.602	0.602	0.602	0.8548	BRD-K80396088	gliquidone
CTSL	HA1E	0.038751	0.367236	0.142739	0.142739	0.374673	0.0294	-0.33425	-0.1274	-0.27675	-0.27675	-0.1895	BRD-K76908866	CP-724714
CTSL	A375	0.0387723	0.294631	0.0537718	0.0537718	0.217677	0.0424	0.4904	1.315	1.21775	1.21775	0.7648	BRD-K51575138	TPCA-1
CTSL	MCF7	0.0388942	0.386471	0.542127	0.542127	0.196973	-0.0333	-0.5612	0.1329	-0.1177	-0.1177	-0.73445	BRD-K55781385	BMS-927711
CTSL	HA1E	0.0389624	0.967418	0.0281787	0.0281787	0.195055	0.0294	0.9793	-0.1992	0.9228	0.9228	1.4328	BRD-K34328244	MF-101
CTSL	HEPG2	0.0391254	0.281046	0.669738	0.669738	0.972122	-0.17825	0.3127	0.253	0.1658	0.1658	-0.2755	BRD-K15592317	CP-466722
CTSL	PC3	0.0393146	0.891875	0.443299	0.443299	0.431805	-0.0109	-0.42795	0.3662	0.2004	0.2004	-0.1966	BRD-A75305484	anidulafungin
CTSL	HT29	0.0393358	0.388602	0.686294	0.686294	0.269485	-0.0918	0.3369	0.2888	0.1612	0.1612	2.5832	BRD-K14529030	meisoindigo
CTSL	HA1E	0.0394005	0.921204	0.578354	0.578354	0.206839	0.0294	-0.446	0.6978	-0.1845	-0.1845	-1.0517	BRD-A45540146	KI-20227
CTSL	PC3	0.0394311	0.639952	0.083161	0.083161	0.25038	-0.0109	0.66475	-0.2626	1.2336	1.2336	0.8487	BRD-K27955832	lomeguatrib
CTSL	HA1E	0.0395538	0.0709791	0.0708577	0.0708577	0.552515	0.0294	0.713	0.9195	0.8561	0.8561	0.5699	BRD-K97399794	quercetin
CTSL	HT29	0.0396631	0.38265	0.639394	0.639394	0.0244175	-0.0918	-0.54185	-0.6335	-0.1184	-0.1184	-0.9958	BRD-A27732521	tolperisone
CTSL	HCC515	0.0397968	0.873743	0.486022	0.486022	0.496845	-0.1524	0.3478	-0.0463	-0.0463	-0.0463	0.0721	BRD-K25311561	KU-55933
CTSL	HA1E	0.0398234	0.594734	0.00165479	0.00165479	0.474572	0.0294	-0.6964	0.1005	-1.2372	-1.2372	-0.6528	BRD-K93255255	indoximod
CTSL	PC3	0.0399198	0.0713726	0.00552055	0.00552055	0.529882	-0.0109	0.5847	0.9001	0.9001	0.9001	-0.2599	BRD-K64785675	TG-100115
CTSL	MCF7	0.0399633	NA	NA	NA	NA	-0.0333	2.1272	NA	NA	NA	NA	BRD-K65592642	semagacestat
CTSL	HA1E	0.0399781	0.425023	0.278464	0.278464	0.823205	0.0294	0.60195	0.3344	0.5603	0.5603	-0.5352	BRD-K43002771	SR-33805
CTSL	HA1E	0.0401918	0.180226	0.893248	0.893248	0.446173	0.0294	-0.46475	0.6449	0.188	0.188	-0.3624	BRD-K94830329	ataluren
CTSL	HEPG2	0.0403691	0.178047	0.314681	0.314681	0.486274	-0.17825	0.2248	0.3664	0.2429	0.2429	0.2067	BRD-K70511574	HMN-214
CTSL	A375	0.0404683	0.149734	0.158859	0.158859	1	0.0424	0.5382	1.0343	0.3362	0.3362	-0.1945	BRD-K75958547	pitavastatin
CTSL	A375	0.0406441	0.0357331	0.00665543	0.00665543	0.774775	0.0424	0.67875	1.1091	1.1091	1.1091	0.1047	BRD-K18678457	ZD-7288
CTSL	HA1E	0.0406705	0.0367009	9.22107e-05	9.22107e-05	0.78551	0.0294	0.8976	1.5635	1.7139	1.7139	-0.0327	BRD-K27204852	balicatib
CTSL	A375	0.0408008	0.601466	0.27695	0.27695	0.595341	0.0424	0.37635	0.0035	0.0035	0.0035	-0.0284	BRD-K83972459	JWE-035
CTSL	HA1E	0.0408594	0.406973	0.23465	0.23465	0.72346	0.0294	-0.4124	-0.5567	-0.4124	-0.4124	0.0276	BRD-K61397605	romidepsin
CTSL	PC3	0.0408925	0.198318	0.185851	0.185851	0.447183	-0.0109	0.2511	0.9785	0.0643	0.0643	0.2992	BRD-K05977355	fluconazole
CTSL	PC3	0.040978	0.676465	0.329907	0.329907	0.0962786	-0.0109	0.64945	0.1577	0.7845	0.7845	1.2279	BRD-A29854054	lorglumide
CTSL	HT29	0.041032	0.316485	0.495986	0.495986	0.206644	-0.0918	-0.5409	-0.608	-0.4723	-0.4723	-1.0208	BRD-K60240222	carglumic-acid
CTSL	HT29	0.0413746	0.103114	0.0843852	0.0843852	0.383998	-0.0918	0.46295	0.6816	0.4943	0.4943	0.1329	BRD-K29950728	clomifene
CTSL	A375	0.0414391	0.78201	0.181378	0.181378	0.0688051	0.0424	0.6745	0.34755	0.628	0.628	1.245	BRD-K69122748	diacerein
CTSL	HT29	0.0414547	0.254772	0.183935	0.183935	0.213655	-0.0918	-0.65715	0.4889	-0.2207	-0.2207	-1.4461	BRD-K02965346	SU-11274
CTSL	PC3	0.0414573	0.0225567	0.0185263	0.0185263	0.864291	-0.0109	0.4297	1.1136	0.7398	0.7398	0.1855	BRD-K54006094	formoterol
CTSL	A375	0.041491	0.73281	0.422609	0.422609	0.204121	0.0424	-0.2361	0.01065	-0.08635	-0.08635	-0.3277	BRD-K49865102	PD-0325901
CTSL	HCC515	0.0415431	0.0174013	0.0101677	0.0101677	0.969403	-0.1524	0.4114	1.149	0.6845	0.6845	-0.4314	BRD-K98143437	SB-239063
CTSL	MCF7	0.0416553	0.84833	0.39163	0.39163	0.19861	-0.0333	-0.4328	-0.4387	-0.4387	-0.4387	-0.4269	BRD-K31111078	dimethyl-fumarate
CTSL	HA1E	0.0416741	0.332547	0.00684999	0.00684999	0.843559	0.0294	-0.2843	-0.3307	-0.6421	-0.6421	0.5445	BRD-A35869383	ibrutinib
CTSL	A375	0.0417471	0.117717	0.0991451	0.0991451	0.291706	0.0424	0.6325	0.8883	0.8883	0.8883	0.493	BRD-K42918627	GSK-2126458
CTSL	PC3	0.0417708	0.034011	0.0700524	0.0700524	0.684157	-0.0109	0.6009	1.2709	0.6089	0.6089	0.129	BRD-A53576514	orphenadrine
CTSL	A375	0.0418122	0.132035	0.0123182	0.0123182	0.756453	0.0424	0.6279	0.9445	0.9445	0.9445	-0.1957	BRD-K31812033	levobunolol
CTSL	HT29	0.0418373	0.156339	0.222924	0.222924	0.167301	-0.0918	0.5325	0.9097	0.3301	0.3301	0.449	BRD-A75479906	rimantadine
CTSL	HA1E	0.0420974	0.282242	0.0367876	0.0367876	0.633454	0.0294	-0.31205	-0.4337	-0.5895	-0.5895	-0.1754	BRD-K46937689	phenazone
CTSL	A375	0.0422146	0.245164	0.0702934	0.0702934	0.209026	0.0424	0.58685	0.9317	0.7025	0.7025	0.4812	BRD-K29133151	ICI-185,282
CTSL	HT29	0.0422229	0.659064	0.0430867	0.0430867	0.382381	-0.0918	0.65775	0.5832	0.7323	0.7323	1.1291	BRD-K51033547	tramadol
CTSL	A375	0.0425715	0.589867	0.299122	0.299122	0.247701	0.0424	-0.268	-0.04045	-0.1432	-0.1432	-0.2676	BRD-K57080016	selumetinib
CTSL	A375	0.0426202	0.182637	0.0726015	0.0726015	0.764289	0.0424	0.45575	0.9999	0.4678	0.4678	-0.0767	BRD-A37780065	triamcinolone
CTSL	MCF7	0.0426774	0.80896	0.146729	0.146729	0.0834216	-0.0333	0.4824	0.4397	0.5243	0.5243	1.1552	BRD-K17075857	chloroxine
CTSL	A375	0.0427018	0.965609	0.98783	0.98783	0.204796	0.0424	-0.33335	0.0335	-0.0414	-0.0414	-0.1688	BRD-K76969307	CG-930
CTSL	HT29	0.0427143	0.456833	0.555077	0.555077	0.846043	-0.0918	0.1378	0.1059	0.1059	0.1059	-0.0335	BRD-U70626184	BI-2536
CTSL	HT29	0.0427348	0.170668	0.0624512	0.0624512	0.356304	-0.0918	-0.40395	-1.0536	-0.4066	-0.4066	-1.1485	BRD-K36627727	tamibarotene
CTSL	MCF7	0.0427698	0.0329544	0.00541657	0.00541657	0.0663256	-0.0333	0.19655	0.7026	0.87035	0.87035	0.94355	BRD-K68174511	torin-2
CTSL	HA1E	0.0427792	0.172049	0.451216	0.451216	0.0567774	0.0294	-0.5512	-0.8277	-0.20785	-0.20785	-1.1729	BRD-K19284129	salvinorin-a
CTSL	HEPG2	0.0428037	0.215247	0.0954079	0.0954079	0.094629	-0.17825	0.2801	0.3397	0.2801	0.2801	0.70785	BRD-K49075727	nintedanib
CTSL	HT29	0.0428998	0.121402	0.504543	0.504543	0.0167209	-0.0918	0.67025	1.6231	0.1905	0.1905	1.1739	BRD-K56032964	AP-26113
CTSL	PC3	0.0430029	0.149929	0.0216505	0.0216505	0.788802	-0.0109	0.4246	0.5504	0.9668	0.9668	-0.0559	BRD-K31495718	AZD-7687
CTSL	PC3	0.0430111	0.555942	0.132099	0.132099	0.3225	-0.0109	-0.4816	-0.2944	-0.6003	-0.6003	-0.5415	BRD-K42805893	osimertinib
CTSL	HA1E	0.0430166	0.0187287	0.0145185	0.0145185	0.931369	0.0294	-0.2389	-1.3203	-0.6604	-0.6604	-0.0643	BRD-K55781385	BMS-927711
CTSL	HT29	0.0430652	0.476797	0.0133382	0.0133382	0.29971	-0.0918	0.6212	0.8451	0.9692	0.9692	-0.4966	BRD-K95921201	reserpine
CTSL	MCF7	0.0430732	0.0923061	0.170512	0.170512	0.108125	-0.0333	0.49445	0.87	0.7046	0.7046	0.7224	BRD-K54472332	elvitegravir
CTSL	A375	0.0431039	0.0215388	0.0845482	0.0845482	0.115531	0.0424	-0.34395	-0.65295	-0.34395	-0.34395	-0.61995	BRD-A58280226	Y-27632
CTSL	HA1E	0.0431405	0.83971	0.118328	0.118328	0.798404	0.0294	-0.3781	-0.3753	-0.4904	-0.4904	-0.1369	BRD-K56277358	MGCD-265
CTSL	MCF7	0.043149	0.435725	0.465224	0.465224	0.361271	-0.0333	-0.5874	-0.602	-0.0731	-0.0731	-0.5574	BRD-K70778732	trazodone
CTSL	A375	0.043201	0.285032	0.545308	0.545308	0.108905	0.0424	0.4097	-0.2431	-0.00745	-0.00745	0.4793	BRD-K41170226	deoxycholic-acid
CTSL	A375	0.0432349	0.135721	0.635722	0.635722	0.115095	0.0424	0.6628	0.6721	0.6535	0.6535	1.0781	BRD-K09078998	deforolimus
CTSL	PC3	0.0432546	0.300443	0.128797	0.128797	0.797278	-0.0109	-0.5884	-0.7669	-0.5957	-0.5957	-0.2574	BRD-K37355418	efaproxiral
CTSL	PC3	0.043381	0.460131	0.0528286	0.0528286	0.497353	-0.0109	-0.4225	-0.1881	-0.6357	-0.6357	-0.4854	BRD-K12735121	TG-100801
CTSL	HT29	0.0433978	0.223267	0.304239	0.304239	0.278587	-0.0918	0.34355	-0.3847	0.3791	0.3791	2.1795	BRD-K88429204	pyrimethamine
CTSL	A375	0.0436073	0.0277443	0.0779267	0.0779267	0.0303413	0.0424	-0.4882	-1.2343	-0.526	-0.526	-1.0184	BRD-K77695569	tiabendazole
CTSL	PC3	0.0436346	0.343116	0.727173	0.727173	0.0647359	-0.0109	-0.5627	0.2325	0.2325	0.2325	-0.7057	BRD-K75649340	tioguanine
CTSL	HA1E	0.0436437	0.781405	0.830871	0.830871	0.686167	0.0294	-0.49765	-0.2541	0.07575	0.07575	-0.0624	BRD-K56343971	vemurafenib
CTSL	A375	0.043732	0.6395	0.175337	0.175337	0.577807	0.0424	0.4583	-0.3987	0.681	0.681	0.2005	BRD-K28912512	nicotinamide
CTSL	PC3	0.0437406	0.851734	0.948086	0.948086	0.130726	-0.0109	-0.41695	0.5881	0.1397	0.1397	-0.6645	BRD-K24616672	procaine
CTSL	HT29	0.0437519	0.813709	0.241053	0.241053	0.0960081	-0.0918	-0.4227	-0.4139	-0.5	-0.5	-0.52045	BRD-A58280226	Y-27632
CTSL	HT29	0.0437534	0.166089	0.634514	0.634514	0.621256	-0.0918	-0.5931	-0.7201	-0.3772	-0.3772	-0.1511	BRD-K43966364	penicillin-v-potassium
CTSL	PC3	0.0439107	0.414162	0.0573929	0.0573929	0.369958	-0.0109	0.4536	0.8134	0.8134	0.8134	-0.4095	BRD-K72827473	CEP-37440
CTSL	PC3	0.0440192	0.106971	0.20338	0.20338	0.410448	-0.0109	-0.3357	-0.55485	-0.3357	-0.3357	-0.0699	BRD-A39996500	radicicol
CTSL	A375	0.0442129	0.399657	0.567332	0.567332	0.455841	0.0424	-0.34815	-0.3463	-0.2871	-0.2871	-0.3458	BRD-K28965160	BVD-523
CTSL	HT29	0.0443234	0.373561	0.0246745	0.0246745	0.990539	-0.0918	0.5029	1.3627	1.0987	1.0987	0.2936	BRD-K76617868	fasudil
CTSL	HT29	0.0444258	NA	NA	NA	NA	-0.0918	0.4192	NA	NA	NA	NA	BRD-A61304759	tanespimycin
CTSL	A549	0.0445534	NA	NA	NA	NA	0.02615	1.5171	NA	NA	NA	NA	BRD-K97118047	4,5,6,7-tetrabromobenzotriazole
CTSL	HA1E	0.0446077	0.00389775	0.00366684	0.00366684	0.499238	0.0294	-0.4926	-2.0138	-1.5298	-1.5298	0.7535	BRD-A25736793	everolimus
CTSL	MCF7	0.0448368	0.503545	0.194335	0.194335	0.137334	-0.0333	0.2928	0.245	0.25905	0.25905	0.7427	BRD-K97799481	theophylline
CTSL	A375	0.0448681	0.167825	0.328132	0.328132	0.428495	0.0424	-0.51385	-0.8472	0.1517	0.1517	-0.6857	BRD-K18157228	fdcyd
CTSL	MCF7	0.0449616	0.527724	0.399295	0.399295	0.146512	-0.0333	-0.39695	-0.3302	-0.3712	-0.3712	-0.843	BRD-K55013654	lorcaserin
CTSL	HT29	0.0449641	0.461329	0.316877	0.316877	0.0535039	-0.0918	-0.565	-0.836	-0.4971	-0.4971	-1.1014	BRD-K89704198	vincamine
CTSL	A375	0.0449746	0.520339	0.698358	0.698358	0.00681939	0.0424	-0.54415	0.5755	0.5755	0.5755	-1.8811	BRD-K55748775	SCH-28080
CTSL	HA1E	0.0449917	0.719038	0.133473	0.133473	0.318025	0.0294	-0.33275	0.3668	-0.2887	-0.2887	-0.3768	BRD-K49685476	TTNPB
CTSL	MCF7	0.0450991	0.325898	0.0745816	0.0745816	0.156811	-0.0333	-0.42205	-0.4982	-0.4982	-0.4982	0.5381	BRD-A97479839	piperidolate
CTSL	HCC515	0.0451788	0.633562	0.0360621	0.0360621	0.472869	-0.1524	0.23455	-0.0127	0.24	0.24	0.2291	BRD-K09991945	GSK-3-inhibitor-II
CTSL	A375	0.0451881	0.318497	0.500161	0.500161	0.111525	0.0424	-0.31245	-0.1437	-0.1437	-0.1437	-0.9224	BRD-K86301799	dipyridamole
CTSL	HT29	0.0452657	0.685739	0.0265952	0.0265952	0.464943	-0.0918	0.24695	0.1621	0.3351	0.3351	-0.2702	BRD-K17944737	artesunate
CTSL	MCF7	0.0452764	0.23837	0.0269928	0.0269928	0.605845	-0.0333	-0.6572	-0.7126	-0.9152	-0.9152	0.0386	BRD-K76775527	nimesulide
CTSL	MCF7	0.0452961	0.316656	0.0503152	0.0503152	0.582737	-0.0333	0.70825	-0.506	0.7445	0.7445	-0.1309	BRD-A42699921	teriflunomide
CTSL	A375	0.0454239	0.412668	0.136898	0.136898	0.323274	0.0424	-0.4475	-0.0154	-0.0154	-0.0154	0.7684	BRD-A82156122	saxagliptin
CTSL	HA1E	0.0454432	0.0618152	0.291889	0.291889	0.0971243	0.0294	0.58255	0.9934	0.535	0.535	0.9828	BRD-K59273480	propentofylline
CTSL	A375	0.0454669	0.0413327	0.139299	0.139299	0.321358	0.0424	0.63215	1.2345	0.6375	0.6375	0.5586	BRD-K84798689	sodium-tanshinone-ii-a-sulfonate
CTSL	A375	0.0455315	0.17056	0.143348	0.143348	0.138179	0.0424	-0.22265	-0.2212	-0.2212	-0.2212	-1.0617	BRD-K59197931	naproxen
CTSL	MCF7	0.0455732	0.168485	0.174192	0.174192	0.349067	-0.0333	-0.683	-0.9734	-0.7468	-0.7468	-0.6629	BRD-K29950728	clomifene
CTSL	HT29	0.0457214	0.516842	0.12361	0.12361	0.163087	-0.0918	0.37825	-0.0351	0.3144	0.3144	0.46	BRD-K82522873	N6022
CTSL	HA1E	0.045941	0.501703	0.0822634	0.0822634	0.584394	0.0294	-0.018	-0.0129	-0.018	-0.018	-0.20155	BRD-K57080016	selumetinib
CTSL	PC3	0.0459516	0.0349492	0.52673	0.52673	0.0250986	-0.0109	0.3048	1.1894	0.1651	0.1651	2.0523	BRD-K83837640	JNJ-26481585
CTSL	HT29	0.0460054	0.534568	0.087401	0.087401	0.656205	-0.0918	0.821	0.831	0.9794	0.9794	0.4164	BRD-K23228615	GDC-0980
CTSL	HA1E	0.0460076	0.385064	0.712893	0.712893	0.145882	0.0294	-0.4415	-0.6998	0.2223	0.2223	-1.143	BRD-K63712959	temoporfin
CTSL	PC3	0.0460626	0.10823	0.250461	0.250461	0.0473664	-0.0109	0.5854	0.8433	0.7364	0.7364	1.294	BRD-K22482860	dalfampridine
CTSL	MCF7	0.0461117	0.914867	0.199795	0.199795	0.437321	-0.0333	0.3367	0.1695	0.2847	0.2847	0.1285	BRD-K62685538	triptorelin
CTSL	HA1E	0.0461386	0.327173	0.218421	0.218421	0.255823	0.0294	-0.2101	0.028	0.028	0.028	-0.237	BRD-A29731977	17-hydroxyprogesterone-caproate
CTSL	A375	0.0461814	0.454657	0.219605	0.219605	0.848845	0.0424	-0.34995	-0.4112	-0.2887	-0.2887	-0.2066	BRD-A25619068	fadrozole
CTSL	A375	0.0462468	0.577138	0.166859	0.166859	0.181353	0.0424	0.5284	0.3937	0.434	0.434	0.7062	BRD-K84892605	IOWH-032
CTSL	MCF7	0.0463729	0.140951	0.146729	0.146729	0.0502239	-0.0333	0.45655	0.3693	0.3693	0.3693	1.3401	BRD-K03390685	cobimetinib
CTSL	PC3	0.0465593	0.302264	0.0577918	0.0577918	0.461426	-0.0109	0.54265	0.79615	0.69575	0.69575	-0.422	BRD-K38852836	ganetespib
CTSL	A549	0.0468372	0.158047	0.631256	0.631256	0.0217293	0.02615	0.43275	0.3442	0.3239	0.3239	1.7556	BRD-K58772419	AZD-6482
CTSL	A375	0.0468863	0.693857	0.694167	0.694167	0.189985	0.0424	0.34615	0.21605	-0.03665	-0.03665	0.3311	BRD-K77908580	entinostat
CTSL	HA1E	0.0470204	0.454738	0.0546592	0.0546592	0.240704	0.0294	0.5777	0.3197	0.514	0.514	1.1235	BRD-K83452553	daminozide
CTSL	A375	0.04706	0.956238	0.394581	0.394581	0.919994	0.0424	-0.61025	0.0094	-0.5439	-0.5439	0.0875	BRD-K29968218	KX2-391
CTSL	HCC515	0.047095	0.969403	0.649095	0.649095	0.15906	-0.1524	0.2591	-0.675	0.2261	0.2261	0.3035	BRD-U64521890	XMD-16144
CTSL	HEPG2	0.0471014	0.676918	0.0102659	0.0102659	0.728757	-0.17825	-0.56155	-0.5205	-0.6507	-0.6507	-0.6026	BRD-K90382497	GW-843682X
CTSL	HA1E	0.0472208	0.100952	0.173885	0.173885	0.00882905	0.0294	0.66075	1.3399	0.3259	0.3259	1.7018	BRD-K35960502	niclosamide
CTSL	A375	0.0472596	0.013872	0.0268332	0.0268332	0.295761	0.0424	0.5213	1.3907	0.7624	0.7624	0.4571	BRD-K08832567	naringenin
CTSL	HCC515	0.0473393	0.618035	0.55522	0.55522	0.796763	-0.1524	0.2607	-0.6973	-0.0371	-0.0371	0.0327	BRD-A35869383	ibrutinib
CTSL	A375	0.0473524	0.44195	0.0598728	0.0598728	0.032988	0.0424	0.53475	0.32355	0.59975	0.59975	0.9924	BRD-K54256913	MK-1775
CTSL	PC3	0.0473868	0.107573	0.146175	0.146175	0.93309	-0.0109	0.64655	0.7801	0.7189	0.7189	-0.5229	BRD-K24968862	SB-683698
CTSL	MCF7	0.0474095	0.212496	0.14357	0.14357	0.338947	-0.0333	0.2871	0.332	0.0777	0.0777	0.3462	BRD-K78567475	dolastatin-10
CTSL	HEPG2	0.047582	0.0152052	0.0014594	0.0014594	0.630382	-0.17825	-0.89315	-2.1145	-1.0935	-1.0935	-1.0868	BRD-K93918653	quizartinib
CTSL	HT29	0.0477859	0.164283	0.597644	0.597644	0.0275206	-0.0918	0.43375	0.3976	0.1396	0.1396	1.1673	BRD-K95763993	trapidil
CTSL	PC3	0.0478692	0.509048	0.0522885	0.0522885	0.651789	-0.0109	0.26	0.16995	0.391	0.391	0.06595	BRD-K37764012	PF-03758309
CTSL	HT29	0.0479218	0.525828	0.573942	0.573942	0.144839	-0.0918	0.3736	-0.0944	-0.0944	-0.0944	1.1653	BRD-M98279124	cevimeline
CTSL	MCF7	0.0479868	0.0182553	0.00112455	0.00112455	0.197667	-0.0333	-0.558	-1.0738	-1.0304	-1.0304	1.1463	BRD-K26341917	L-ergothioneine
CTSL	A549	0.0480314	0.440061	0.0637558	0.0637558	0.814221	0.02615	0.4482	0.8282	0.6377	0.6377	-0.1426	BRD-K76908866	CP-724714
CTSL	HT29	0.0480579	0.695207	0.345351	0.345351	0.882558	-0.0918	0.4391	0.6007	0.44	0.44	-0.1203	BRD-A29731977	17-hydroxyprogesterone-caproate
CTSL	A375	0.0480651	0.609677	0.103861	0.103861	0.446423	0.0424	0.39775	-0.1508	0.4135	0.4135	0.382	BRD-K72222507	quinapril
CTSL	HT29	0.0482628	0.971623	0.699748	0.699748	0.02787	-0.0918	0.38815	0.3979	-0.088	-0.088	0.8657	BRD-K14870255	R-428
CTSL	HT29	0.0482628	0.0889265	0.0608655	0.0608655	0.454148	-0.0918	0.39325	0.4677	0.4677	0.4677	0.3533	BRD-K73440166	cinaciguat
CTSL	PC3	0.0483592	0.0481533	0.0180015	0.0180015	0.371735	-0.0109	-0.17885	-1.3516	-1.1597	-1.1597	-0.49595	BRD-K26818574	BIX-01294
CTSL	HA1E	0.0483925	0.890013	0.302139	0.302139	0.620197	0.0294	0.4065	0.3063	0.3063	0.3063	0.2254	BRD-K19061412	mubritinib
CTSL	HT29	0.0483998	0.281667	0.329572	0.329572	0.0147186	-0.0918	0.46755	0.7312	0.3043	0.3043	1.3628	BRD-K01621533	acarbose
CTSL	HT29	0.0484455	0.0966006	0.337977	0.337977	0.512697	-0.0918	0.51375	0.5676	0.4599	0.4599	0.3197	BRD-K23248433	camicinal
CTSL	HA1E	0.0484836	0.718302	0.873094	0.873094	0.0393477	0.0294	-0.4762	-0.1451	0.0086	0.0086	-1.0466	BRD-A41451487	PK-11195
CTSL	PC3	0.0485995	0.243195	0.405091	0.405091	0.132605	-0.0109	0.3378	0.46245	0.174	0.174	0.7312	BRD-K36740062	GSK-1070916
CTSL	A375	0.0486572	NA	NA	NA	NA	0.0424	-0.8744	NA	NA	NA	NA	BRD-K64634304	tretinoin
CTSL	PC3	0.0487196	0.159636	0.0533598	0.0533598	0.975282	-0.0109	0.40295	0.7798	0.7316	0.7316	-0.0631	BRD-K97010173	deferasirox
CTSL	MCF7	0.0489562	0.16761	0.225504	0.225504	0.980189	-0.0333	0.1303	0.358	0.1303	0.1303	-0.08645	BRD-K78431006	crizotinib
CTSL	A375	0.0490883	0.00551828	0.00133306	0.00133306	0.969515	0.0424	-0.4585	-1.6464	-0.9593	-0.9593	0.175	BRD-K62762455	RU-58841
CTSL	A375	0.0491342	0.674922	0.140969	0.140969	0.200628	0.0424	-0.40785	-0.1027	-0.2143	-0.2143	-0.7633	BRD-K19438463	CNQX
CTSL	A375	0.0491801	0.0197939	0.265024	0.265024	0.475613	0.0424	-0.4654	-1.4675	-0.5905	-0.5905	-0.3719	BRD-K50133271	tolfenamic-acid
CTSL	PC3	0.0492594	0.101176	0.03398	0.03398	0.23963	-0.0109	0.6455	0.5901	0.6178	0.6178	1.0505	BRD-K53097745	pterostilbene
CTSL	A375	0.0492721	0.441756	0.392701	0.392701	0.0213457	0.0424	-0.27565	-0.1855	-0.1203	-0.1203	-1.2668	BRD-K25630527	LY-2784544
CTSL	MCF7	0.0493482	0.275024	0.172467	0.172467	0.184801	-0.0333	0.359	0.164	0.1931	0.1931	0.359	BRD-K72703948	ZM-447439
CTSL	MCF7	0.0493499	0.80407	0.128748	0.128748	0.813857	-0.0333	0.3564	-0.1422	0.4685	0.4685	0.2443	BRD-K22096725	ALW-II-49-7
CTSL	HT29	0.0493947	0.125738	0.0352118	0.0352118	0.735777	-0.0918	-0.6874	-0.6667	-0.91115	-0.91115	-0.0574	BRD-K39252998	atipamezole
CTSL	A549	0.0494157	0.0476386	0.059521	0.059521	0.354549	0.02615	-0.51585	-0.9704	-0.7942	-0.7942	-0.3225	BRD-K57282030	JW-7-24-1
CTSL	A375	0.0494796	0.404887	0.16965	0.16965	0.999218	0.0424	-0.4281	0.1175	-0.215	-0.215	0.2611	BRD-K17849083	tranilast
CTSL	MCF7	0.0495199	0.347676	0.566164	0.566164	0.0362759	-0.0333	0.65025	1.4	0.7689	0.7689	1.378	BRD-K47554101	eperezolid
CTSL	MCF7	0.0495412	0.192999	0.17877	0.17877	0.142172	-0.0333	0.48735	0.7064	0.5984	0.5984	1.4898	BRD-K70924353	amtolmetin-guacil
CTSL	A375	0.0496207	0.0239938	0.0569755	0.0569755	0.155782	0.0424	-0.6397	-1.0706	-0.6397	-0.6397	-0.8048	BRD-K23082237	butaclamol
CTSL	A375	0.0496414	0.82626	0.210514	0.210514	0.0767735	0.0424	-0.15055	-0.0818	-0.0818	-0.0818	0.7065	BRD-K56032964	AP-26113
CTSL	HT29	0.0496708	0.0438714	0.402847	0.402847	0.0701762	-0.0918	0.4166	1.1422	0.3024	0.3024	1.3966	BRD-A03506276	XL-888
CTSL	HA1E	0.0496795	0.501033	0.767129	0.767129	0.289127	0.0294	0.5342	0.5342	-0.1185	-0.1185	0.8945	BRD-K81258678	triptolide
CTSL	HA1E	0.0496916	0.176102	0.0550175	0.0550175	0.673565	0.0294	-0.3207	-1.2553	-0.439	-0.439	0.4023	BRD-K59325863	delanzomib
CTSL	MCF7	0.0497331	0.965101	0.0381234	0.0381234	0.267557	-0.0333	-0.3658	-0.324	-0.8215	-0.8215	-0.3456	BRD-K06762493	isbufylline
CTSL	HA1E	0.049798	0.110937	0.304939	0.304939	0.413687	0.0294	0.32885	0.9127	0.2896	0.2896	0.3681	BRD-A38592941	timonacic
CTSL	PC3	0.0498766	NA	0.0498766	0.0498766	NA	-0.0109	0.9424	NA	0.9424	0.9424	NA	BRD-A55453956	compound e
CTSL	A375	0.0498839	0.0500294	0.0037831	0.0037831	0.107827	0.0424	-0.8437	-1.21705	-0.89455	-0.89455	0.9388	BRD-K88789588	letrozole
CTSL	HT29	0.0499048	0.79915	0.0324754	0.0324754	0.422052	-0.0918	0.4011	-0.0342	0.4113	0.4113	-1.0003	BRD-K64838454	dipraglurant
CTSL	HEPG2	0.0499214	0.728757	0.0730921	0.0730921	0.229507	-0.17825	-0.7117	-0.0222	-0.7601	-0.7601	-0.8316	BRD-K53328210	JW55
CTSL	MCF7	0.0499899	0.22916	0.0714206	0.0714206	0.530972	-0.0333	-0.34345	-0.3853	-0.3821	-0.3821	-0.267	BRD-K25433859	maprotiline
CTSL	HCC515	0.0500972	0.0204579	0.1394	0.1394	0.873743	-0.1524	0.374	0.9799	0.7654	0.7654	0.0833	BRD-A68739437	NPK76-II-72-1
CTSL	HT29	0.0502813	0.107575	0.0397913	0.0397913	0.43096	-0.0918	-0.5249	-0.6571	-0.5927	-0.5927	-1.0381	BRD-K99475619	genz-644282
CTSL	A375	0.0503402	0.01563	0.0443119	0.0443119	0.149181	0.0424	0.6689	1.9529	0.6734	0.6734	-0.4305	BRD-A22769835	homochlorcyclizine
CTSL	HEPG2	0.0503616	0.469601	0.0181033	0.0181033	0.676918	-0.17825	-0.5896	-0.542	-0.8515	-0.8515	0.1606	BRD-K49055432	A-66
CTSL	HA1E	0.0504074	0.865955	0.738862	0.738862	0.614997	0.0294	-0.5154	-0.4131	-0.2703	-0.2703	-0.5583	BRD-A33084557	tioconazole
CTSL	HA1E	0.0505253	0.739378	0.208196	0.208196	0.474572	0.0294	0.5615	0.5147	0.6083	0.6083	0.653	BRD-K01674964	histamine
CTSL	MCF7	0.0505719	0.373739	0.437109	0.437109	0.279011	-0.0333	0.36635	0.0714	0.2025	0.2025	0.365	BRD-A30984645	GDC-0834
CTSL	A375	0.0505819	0.54479	0.108443	0.108443	0.0371095	0.0424	-0.2892	-0.1661	-0.3934	-0.3934	-1.30815	BRD-K09397065	SR-57227A
CTSL	HCC515	0.0506128	0.0108348	0.105396	0.105396	0.234416	-0.1524	0.27455	1.2377	0.6943	0.6943	0.33	BRD-K52751261	TAK-715
CTSL	A375	0.0508342	0.0515245	0.189699	0.189699	0.926999	0.0424	0.53435	0.6884	0.6549	0.6549	0.1398	BRD-A02367930	ethinyl-estradiol
CTSL	HA1E	0.0508804	0.0233164	0.00125126	0.00125126	0.357171	0.0294	0.42155	1.9678	0.9489	0.9489	0.1796	BRD-K17203476	LY-2874455
CTSL	A375	0.0509761	0.0759605	0.0943787	0.0943787	0.0809459	0.0424	-0.3737	-0.569	-0.3815	-0.3815	-1.0443	BRD-K74190368	resorcinol
CTSL	HT29	0.0510174	0.0574719	0.48439	0.48439	0.378356	-0.0918	-0.5308	-1.1736	-0.3455	-0.3455	-0.7613	BRD-K16077845	fentiazac
CTSL	A375	0.0513085	0.162602	0.0960594	0.0960594	0.50082	0.0424	0.46075	0.4756	0.4756	0.4756	0.4459	BRD-K22861715	chrysin
CTSL	A375	0.0513371	0.08975	0.731056	0.731056	0.114869	0.0424	-0.5178	-0.4884	-0.3593	-0.3593	-0.5669	BRD-K37561857	zardaverine
CTSL	HA1E	0.0513571	0.278296	0.128409	0.128409	0.96075	0.0294	-0.36385	-0.249	-0.3385	-0.3385	0.0454	BRD-K68548958	BRD-K68548958
CTSL	HA1E	0.051405	0.047945	0.0287331	0.0287331	0.96075	0.0294	0.7286	1.0694	0.8635	0.8635	-0.1652	BRD-K25943794	blonanserin
CTSL	MCF7	0.0514144	0.753226	0.907454	0.907454	0.119839	-0.0333	0.5011	0.3233	0.3078	0.3078	0.83225	BRD-K37590257	GSK-256066
CTSL	HT29	0.0516628	0.29833	0.841741	0.841741	0.197958	-0.0918	0.4265	-0.5831	0.1977	0.1977	0.6752	BRD-A61767428	ursolic-acid
CTSL	MCF7	0.0517086	0.378117	0.829505	0.829505	0.198295	-0.0333	0.50705	-0.4186	0.0067	0.0067	0.9401	BRD-K03601870	ixabepilone
CTSL	MCF7	0.0519415	NA	NA	NA	NA	-0.0333	1.3206	NA	NA	NA	NA	BRD-K69608737	tacrolimus
CTSL	PC3	0.0519932	0.637809	0.0644542	0.0644542	0.496087	-0.0109	0.7674	-0.3437	0.9805	0.9805	0.7214	BRD-K91301684	noscapine
CTSL	HA1E	0.0520056	0.246605	0.094634	0.094634	0.0971123	0.0294	-0.16315	-0.1082	-0.22585	-0.22585	-0.3216	BRD-K86797399	SB-939
CTSL	PC3	0.0520915	0.17357	0.444328	0.444328	0.116017	-0.0109	-0.35875	-0.5697	-0.3321	-0.3321	-1.262	BRD-K01824921	DPCPX
CTSL	PC3	0.052118	0.799594	0.34023	0.34023	0.183408	-0.0109	-0.38715	0.0273	-0.5772	-0.5772	-0.7816	BRD-A14886633	norgestrel
CTSL	A375	0.0522011	0.453814	0.0220519	0.0220519	0.287689	0.0424	0.6511	0.4552	1.00875	1.00875	-0.2683	BRD-K88052444	urea
CTSL	A375	0.0522439	0.137399	0.290911	0.290911	0.618628	0.0424	-0.65485	-0.7794	-0.7169	-0.7169	-0.5928	BRD-A88138582	halcinonide
CTSL	HA1E	0.0522975	0.958789	0.820448	0.820448	0.501115	0.0294	0.6068	0.6066	0.4442	0.4442	0.2406	BRD-K54770957	etoricoxib
CTSL	PC3	0.0523625	0.83219	0.572686	0.572686	0.0488365	-0.0109	0.36595	-0.434	0.1689	0.1689	1.1299	BRD-K61195623	combretastatin-A-4
CTSL	HA1E	0.0524026	0.218763	0.668977	0.668977	0.0442398	0.0294	-0.2615	-0.315	0	0	-1.2665	BRD-K72922393	linsidomine
CTSL	HCC515	0.0524527	0.637469	0.466595	0.466595	0.426886	-0.1524	0.0965	0.0987	0.0987	0.0987	0.0765	BRD-K99545815	PF-562271
CTSL	HA1E	0.0524678	0.0590533	0.0184197	0.0184197	0.249698	0.0294	0.45715	1.6587	0.7567	0.7567	0.1687	BRD-K66937583	lodoxamide
CTSL	PC3	0.0525852	0.330795	0.0743908	0.0743908	0.188731	-0.0109	0.18765	0.8031	0.7677	0.7677	0.5441	BRD-K47554101	eperezolid
CTSL	HA1E	0.0526141	0.248889	0.522508	0.522508	0.21076	0.0294	-0.34945	-0.5873	-0.2743	-0.2743	-0.4028	BRD-A41692738	TGX-221
CTSL	PC3	0.0526596	0.41131	0.763585	0.763585	0.674639	-0.0109	0.3921	-0.4074	0.1572	0.1572	-0.006	BRD-K50387473	XMD-892
CTSL	MCF7	0.0527768	0.308015	0.50207	0.50207	0.191768	-0.0333	-0.66025	-0.6425	-0.4091	-0.4091	-0.679	BRD-K67578145	GDC-0879
CTSL	HA1E	0.0528588	0.798404	0.585552	0.585552	0.331566	0.0294	-0.2665	0.2576	0.227	0.227	-0.045	BRD-K95412502	istaroxime
CTSL	MCF7	0.0528667	0.403006	0.621582	0.621582	0.708457	-0.0333	0.5752	0.7505	0.0929	0.0929	0.2374	BRD-K95921201	reserpine
CTSL	HA1E	0.0528833	0.339468	0.108379	0.108379	0.870602	0.0294	-0.47085	-0.3854	-0.6391	-0.6391	0.12	BRD-A47598013	citalopram
CTSL	A375	0.0529548	0.640981	0.672222	0.672222	0.0869068	0.0424	0.5148	-0.219	0.1066	0.1066	0.989	BRD-K19687926	lapatinib
CTSL	HT29	0.0529571	0.245511	0.00167056	0.00167056	0.332665	-0.0918	-0.3546	-0.2901	-1.001	-1.001	-0.3047	BRD-A39996500	radicicol
CTSL	A375	0.0529765	0.780034	0.621687	0.621687	0.380205	0.0424	-0.492	-0.2325	-0.2939	-0.2939	-1.11105	BRD-A10967948	granisetron
CTSL	MCF7	0.0530693	0.129859	0.0488363	0.0488363	0.620095	-0.0333	0.3915	0.6816	0.4842	0.4842	0.4361	BRD-K73794685	azithromycin
CTSL	A375	0.053071	0.379146	0.51154	0.51154	0.352404	0.0424	-0.0556	0.3559	0.0568	0.0568	-0.1195	BRD-K48168960	propylthiouracil
CTSL	HA1E	0.0531167	0.134765	0.320577	0.320577	0.452904	0.0294	-0.426	1.7652	-0.4564	-0.4564	-0.32305	BRD-A40639672	ketorolac
CTSL	A375	0.05312	0.356989	0.1861	0.1861	0.40048	0.0424	-0.3436	-0.3942	-0.3934	-0.3934	0.0796	BRD-A21584801	brivanib
CTSL	PC3	0.0531514	0.492472	0.0353053	0.0353053	0.0334	-0.0109	-0.2402	0.002	-0.2402	-0.2402	-0.7253	BRD-K71035033	masitinib
CTSL	A549	0.0532066	0.891966	0.433123	0.433123	0.2169	0.02615	-0.32965	-0.22305	-0.2034	-0.2034	-0.37075	BRD-U86686840	AZD-7762
CTSL	A549	0.0532425	0.32333	0.371341	0.371341	0.654876	0.02615	-0.2976	-0.0035	-0.283	-0.283	-0.08	BRD-K20285085	fostamatinib
CTSL	PC3	0.053283	0.0400266	0.469423	0.469423	0.0660503	-0.0109	0.57595	-1.3422	0.263	0.263	0.7447	BRD-A29844814	ABT-202
CTSL	PC3	0.0534084	0.577035	0.219383	0.219383	0.304427	-0.0109	0.29015	0.2518	0.3031	0.3031	0.4386	BRD-K77947974	fluspirilene
CTSL	MCF7	0.0535446	0.805117	0.930781	0.930781	0.837743	-0.0333	0.4229	0.2981	0.1581	0.1581	-0.1215	BRD-K56614220	clofazimine
CTSL	MCF7	0.0537038	0.104415	0.130789	0.130789	0.529494	-0.0333	0.41535	1.3342	0.3022	0.3022	0.1769	BRD-A22642447	licarbazepine
CTSL	PC3	0.0537608	0.811973	0.214769	0.214769	0.641382	-0.0109	0.466	0.514	0.514	0.514	0.2512	BRD-K28542495	benzydamine
CTSL	HA1E	0.0537723	0.796884	0.456085	0.456085	0.121567	0.0294	-0.2012	0.0449	0.0449	0.0449	-0.8408	BRD-A68942014	amitifadine
CTSL	HA1E	0.053822	0.167611	0.105478	0.105478	0.499863	0.0294	0.71215	0.8238	0.7771	0.7771	0.6472	BRD-A67479912	progesterone
CTSL	HT29	0.0538274	0.959807	0.791312	0.791312	0.0829719	-0.0918	0.33655	0.2576	0.2139	0.2139	0.8562	BRD-K73691377	alprostadil
CTSL	A375	0.0538843	0.21296	0.222804	0.222804	0.386357	0.0424	-0.52605	-0.2296	-0.2296	-0.2296	-1.0937	BRD-K15567136	papaverine
CTSL	MCF7	0.0539984	0.949333	0.189729	0.189729	0.545264	-0.0333	0.7394	0.32915	0.7991	0.7991	-0.4447	BRD-K00152668	adarotene
CTSL	HA1E	0.0540464	0.155384	0.215989	0.215989	0.546605	0.0294	-0.2216	-0.593	-0.1265	-0.1265	-0.1822	BRD-K96342952	tobramycin
CTSL	HA1E	0.0542214	0.0953523	0.0506438	0.0506438	0.483128	0.0294	-0.4015	-0.4871	-0.4871	-0.4871	0.0103	BRD-K12219985	glipizide
CTSL	A375	0.0542473	0.159964	0.413674	0.413674	0.044039	0.0424	-0.41	-0.41	-0.4051	-0.4051	-0.9892	BRD-K62387885	basimglurant
CTSL	HT29	0.0542787	0.0917446	0.398536	0.398536	0.431249	-0.0918	0.21385	0.7222	0.0515	0.0515	0.983	BRD-K96342952	tobramycin
CTSL	MCF7	0.0543217	0.749461	0.163799	0.163799	0.939596	-0.0333	-0.5473	0.1366	-0.587	-0.587	-0.3279	BRD-A29844814	ABT-202
CTSL	MCF7	0.0544	0.356075	0.633136	0.633136	0.0297308	-0.0333	0.3746	0.3746	0.0712	0.0712	1.5757	BRD-K03384561	roquinimex
CTSL	PC3	0.0544206	0.302782	0.0886298	0.0886298	0.118944	-0.0109	0.2278	0.3348	0.3348	0.3348	1.186	BRD-K37694030	doxepin
CTSL	HT29	0.0546825	0.157062	0.126201	0.126201	0.83137	-0.0918	-0.39955	-0.8361	-0.4322	-0.4322	-0.1224	BRD-A33084557	tioconazole
CTSL	A375	0.0546828	0.910276	0.689598	0.689598	0.240814	0.0424	-0.4763	0.2107	-0.1157	-0.1157	-0.5013	BRD-K44771174	ibutamoren
CTSL	HA1E	0.0547068	0.34497	0.137914	0.137914	0.0468451	0.0294	-0.4969	-0.2592	-0.37805	-0.37805	-0.6373	BRD-K25433859	maprotiline
CTSL	HA1E	0.0547747	0.0795255	0.0364817	0.0364817	0.605343	0.0294	0.39735	0.7897	0.7849	0.7849	0.0167	BRD-K56558538	ambroxol
CTSL	MCF7	0.0548756	0.235508	0.0273545	0.0273545	0.607737	-0.0333	-0.5789	-0.6809	-0.6678	-0.6678	-0.0651	BRD-K30466858	ellagic-acid
CTSL	HA1E	0.0548888	0.00913947	0.11077	0.11077	0.373872	0.0294	-0.4444	-1.4323	-0.8042	-0.8042	-0.5884	BRD-K51143828	lurasidone
CTSL	PC3	0.0549327	0.440343	0.197112	0.197112	0.818569	-0.0109	-0.6972	0.1265	-0.5437	-0.5437	0.6374	BRD-A50764878	MDL-73005EF
CTSL	PC3	0.0550356	0.219302	0.0696524	0.0696524	0.659372	-0.0109	-0.29805	-0.5239	-0.3553	-0.3553	-0.9422	BRD-K49468759	KIN001-266
CTSL	PC3	0.0551675	0.859081	0.235821	0.235821	0.190352	-0.0109	-0.5145	-0.0987	-0.3217	-0.3217	-0.69595	BRD-A82156122	saxagliptin
CTSL	A375	0.0552651	0.121464	0.0387686	0.0387686	0.915393	0.0424	-0.9537	-1.4799	-1.4799	-1.4799	-0.03725	BRD-K43586850	lacidipine
CTSL	MCF7	0.0552945	0.457545	0.302095	0.302095	0.122048	-0.0333	-0.42835	-0.2281	-0.3362	-0.3362	-1.0575	BRD-K96550715	linagliptin
CTSL	A549	0.0553579	0.198981	0.034372	0.034372	0.652326	0.02615	-0.42185	-0.5243	-1.083	-1.083	-0.0027	BRD-K13390322	AT-7519
CTSL	HT29	0.0553787	0.747912	0.474959	0.474959	0.454148	-0.0918	0.40255	0.10325	0.5295	0.5295	0.1846	BRD-A65013509	oxybutynin
CTSL	MCF7	0.0554508	0.0951327	0.0117589	0.0117589	0.0919575	-0.0333	0.4972	0.7476	0.6224	0.6224	-0.8662	BRD-K06294530	UK-383367
CTSL	PC3	0.0557083	0.121568	0.35447	0.35447	0.0416518	-0.0109	-0.5863	-0.5886	-0.584	-0.584	-1.3517	BRD-K34157611	cimetidine
CTSL	A375	0.0557336	0.17674	0.526597	0.526597	0.0832692	0.0424	-0.392	-0.60385	-0.0025	-0.0025	-1.3065	BRD-K99964838	bosutinib
CTSL	MCF7	0.0558003	0.892314	0.0198631	0.0198631	0.561872	-0.0333	-0.66235	-0.102	-0.7358	-0.7358	0.6059	BRD-K48367671	febuxostat
CTSL	PC3	0.055812	0.377002	0.313389	0.313389	0.0494591	-0.0109	0.43075	0.7494	0.2945	0.2945	1.24815	BRD-K99023089	AZD-5363
CTSL	HA1E	0.0558182	0.93998	0.379743	0.379743	0.0791885	0.0294	0.34645	0.374	0.3504	0.3504	1.4604	BRD-K05446112	ledipasvir
CTSL	MCF7	0.055889	0.0483196	0.0453554	0.0453554	0.602278	-0.0333	-0.39375	-0.66115	-0.41655	-0.41655	-0.28855	BRD-U60236422	WH-4-025
CTSL	HA1E	0.0559723	0.151135	0.115678	0.115678	0.495495	0.0294	-0.1893	-1.0887	-0.2975	-0.2975	-0.0811	BRD-K96936751	bretazenil
CTSL	PC3	0.055987	0.852374	0.564085	0.564085	0.489318	-0.0109	0.401	0.2157	0.1694	0.1694	0.23895	BRD-K56343971	vemurafenib
CTSL	A375	0.05599	0.24656	0.080437	0.080437	0.117372	0.0424	0.6922	0.9774	0.709	0.709	-0.5744	BRD-A65248799	EMD-53998
CTSL	MCF7	0.0560219	0.796402	0.0456489	0.0456489	0.840563	-0.0333	-0.62635	-0.6305	-0.7325	-0.7325	-0.1537	BRD-K32101625	LX-1031
CTSL	PC3	0.0560734	0.417598	0.329166	0.329166	0.0306243	-0.0109	0.5217	-1.2324	0.3617	0.3617	1.574	BRD-K74763371	bosentan
CTSL	PC3	0.0562286	0.402646	0.443105	0.443105	0.481019	-0.0109	0.36165	0.49945	0.1645	0.1645	0.36165	BRD-K91825936	ZK-811752
CTSL	PC3	0.0562305	0.756679	0.115446	0.115446	0.948996	-0.0109	0.3866	0.3908	0.4435	0.4435	-0.2195	BRD-A75726477	clenbuterol
CTSL	PC3	0.0562567	0.339819	0.00962123	0.00962123	0.790341	-0.0109	0.3191	0.6972	0.7101	0.7101	0.1306	BRD-K73815512	HC-030031
CTSL	MCF7	0.0562819	0.051023	0.0159502	0.0159502	0.916657	-0.0333	-0.61985	-0.8793	-0.7256	-0.7256	-0.564	BRD-A65248799	EMD-53998
CTSL	HT29	0.0564268	0.245815	0.449514	0.449514	0.292856	-0.0918	-0.4466	-0.3751	-0.3751	-0.3751	-0.6697	BRD-A46179541	doxapram
CTSL	HT29	0.0564527	0.517481	0.270829	0.270829	0.279026	-0.0918	0.4885	0.4665	0.509	0.509	1.1843	BRD-K16762525	clarithromycin
CTSL	A375	0.0565155	0.328583	0.834431	0.834431	0.0476583	0.0424	0.7399	-0.3273	-0.2309	-0.2309	0.8797	BRD-A26711594	nicardipine
CTSL	PC3	0.0567039	0.897409	0.954051	0.954051	0.172153	-0.0109	0.59275	0.196	0.196	0.196	0.6693	BRD-K15507868	tesaglitazar
CTSL	HT29	0.0568438	0.704723	0.0458307	0.0458307	0.881778	-0.0918	-0.51755	-0.0373	-0.587	-0.587	-0.3365	BRD-K90195324	bazedoxifene
CTSL	HT29	0.05687	0.866596	0.840182	0.840182	0.0518748	-0.0918	0.40975	0.2528	-0.237	-0.237	0.8415	BRD-K18673820	folic-acid
CTSL	PC3	0.0569418	0.458918	0.227934	0.227934	0.2471	-0.0109	0.4597	0.0975	0.3636	0.3636	0.7697	BRD-K97158071	droperidol
CTSL	HT29	0.0569747	0.899741	0.317291	0.317291	0.12721	-0.0918	-0.38525	-0.1872	-0.2363	-0.2363	-0.7161	BRD-K60219430	serdemetan
CTSL	HT29	0.0572109	0.112858	0.67003	0.67003	0.138415	-0.0918	0.2972	0.4962	0.2824	0.2824	1.1444	BRD-K41410256	balsalazide
CTSL	MCF7	0.0572358	0.565528	0.0569492	0.0569492	0.0338556	-0.0333	-0.7976	-0.7858	-0.9291	-0.9291	-1.2756	BRD-K12040459	AT7867
CTSL	HA1E	0.057244	0.567757	0.0697139	0.0697139	0.109839	0.0294	0.6949	-0.1007	0.7054	0.7054	0.6844	BRD-A61793559	metolazone
CTSL	MCF7	0.0573319	0.187504	0.22935	0.22935	0.331258	-0.0333	0.45775	0.3521	0.3521	0.3521	-0.7594	BRD-K08703257	3-amino-benzamide
CTSL	A549	0.0573481	0.512158	0.0810589	0.0810589	0.00483179	0.02615	-1.0378	-0.5568	-1.0378	-1.0378	-2.3102	BRD-K78431006	crizotinib
CTSL	HT29	0.0575535	0.101248	0.0629739	0.0629739	0.777856	-0.0918	-0.6144	-1.0878	-0.6557	-0.6557	0.3868	BRD-K53972329	ruxolitinib
CTSL	MCF7	0.0575729	0.855404	0.748662	0.748662	0.939596	-0.0333	-0.3132	0.2466	0.2466	0.2466	-0.126	BRD-K32405725	etomoxir
CTSL	PC3	0.0576071	0.907698	0.156519	0.156519	0.293041	-0.0109	0.6662	0.1342	0.4906	0.4906	0.8708	BRD-A34006693	suprofen
CTSL	PC3	0.0576339	0.429758	0.0108178	0.0108178	0.28441	-0.0109	0.33415	-0.0783	0.4396	0.4396	-0.2273	BRD-A08187463	racecadotril
CTSL	HCC515	0.0577305	0.0373221	0.01174	0.01174	0.029602	-0.1524	0.16755	1.0225	0.8278	0.8278	1.2361	BRD-K76969307	CG-930
CTSL	PC3	0.0577948	0.650009	0.345091	0.345091	0.569448	-0.0109	0.3638	0.46035	0.3638	0.3638	0.28585	BRD-K64800655	PHA-793887
CTSL	A375	0.0578444	0.164081	0.409812	0.409812	0.0544088	0.0424	0.66435	-0.5046	0.4	0.4	0.8504	BRD-K05446112	ledipasvir
CTSL	A375	0.057897	0.354947	0.0226561	0.0226561	0.921161	0.0424	0.4327	0.9569	0.7333	0.7333	-0.0885	BRD-K37355418	efaproxiral
CTSL	PC3	0.057953	0.057953	NA	0.057953	0.057953	-0.0109	1.0529	1.0529	NA	1.0529	1.0529	BRD-K74148702	curcumin
CTSL	MCF7	0.0579601	0.303754	0.84576	0.84576	0.115441	-0.0333	0.4015	0.8754	0.2206	0.2206	0.5286	BRD-K99604664	tanaproget
CTSL	HA1E	0.0579811	0.733812	0.849464	0.849464	0.117477	0.0294	0.382	-0.5318	0.1732	0.1732	0.7726	BRD-K48812570	macitentan
CTSL	A375	0.0580816	0.942193	0.269041	0.269041	0.173792	0.0424	-0.30375	-0.3427	-0.3427	-0.3427	-0.3578	BRD-K23248433	camicinal
CTSL	PC3	0.0581542	0.852374	0.185618	0.185618	0.606419	-0.0109	0.4201	0.1302	0.459	0.459	0.11315	BRD-K67868012	PI-103
CTSL	HT29	0.0581904	0.29879	0.211567	0.211567	0.458329	-0.0918	-0.8132	-0.4506	-0.4506	-0.4506	-1.0163	BRD-K58486055	reparixin
CTSL	HT29	0.0585647	0.0559324	0.0981829	0.0981829	0.126963	-0.0918	0.30655	1.0901	0.3502	0.3502	0.3683	BRD-K10670311	sulfasalazine
CTSL	PC3	0.0585652	0.0132201	0.155272	0.0585652	0.150071	-0.0109	-0.4302	-1.4648	-0.4076	-0.4302	-0.5749	BRD-K92301463	16,16-dimethylprostaglandin-e2
CTSL	A375	0.0585954	0.0981088	0.116075	0.116075	0.229417	0.0424	-0.3176	-0.8917	-0.3146	-0.3146	0.5607	BRD-K98453471	salirasib
CTSL	MCF7	0.0586429	0.130775	0.146007	0.146007	0.0587657	-0.0333	-0.67955	-0.7483	-0.681	-0.681	-0.8795	BRD-A17411484	carprofen
CTSL	A375	0.0588555	NA	0.0588555	0.0588555	NA	0.0424	0.7435	NA	0.7435	0.7435	NA	BRD-K04701033	VE-822
CTSL	HA1E	0.0588875	0.067808	0.126003	0.126003	0.668184	0.0294	-0.6545	-1.4806	-0.1962	-0.1962	0.6244	BRD-A31521121	methocarbamol
CTSL	PC3	0.0589658	0.658287	0.391282	0.391282	0.0428172	-0.0109	0.5353	0	0	0	0.9916	BRD-A67097164	ifosfamide
CTSL	HT29	0.0590218	0.0432543	0.0066904	0.0066904	0.0820986	-0.0918	0.4628	0.7763	0.7763	0.7763	-1.0243	BRD-K38868394	MK-0773
CTSL	MCF7	0.0590854	0.821567	0.34995	0.34995	0.59956	-0.0333	0.15705	-0.0872	0.1083	0.1083	-0.3493	BRD-K83972459	JWE-035
CTSL	HA1E	0.0592101	0.373328	0.115022	0.115022	0.909491	0.0294	0.45595	0.4395	0.4724	0.4724	0.3047	BRD-A38076815	glafenine
CTSL	A549	0.0593434	0.248063	0.18144	0.18144	0.163226	0.02615	0.31355	0.91615	0.4439	0.4439	0.56475	BRD-K76969307	CG-930
CTSL	HT29	0.0593575	0.312989	0.525502	0.525502	0.422624	-0.0918	-0.4586	-0.73885	-0.2679	-0.2679	-0.4677	BRD-A93353767	isoconazole
CTSL	HEPG2	0.0595333	0.486274	0.474005	0.474005	0.534615	-0.17825	0.26715	-0.2363	0.148	0.148	-0.3559	BRD-A29901043	KIN001-127
CTSL	HEPG2	0.0597279	0.466056	0.563358	0.563358	0.320238	-0.17825	0.2755	0.1177	0.11325	0.11325	0.0831	BRD-K02113016	olaparib
CTSL	HA1E	0.059751	0.460698	0.370729	0.370729	0.311393	0.0294	-0.675	-0.4584	-0.4584	-0.4584	0.4048	BRD-K14109347	LY-2603618
CTSL	PC3	0.0598625	0.679025	0.566429	0.566429	0.312737	-0.0109	0.4383	0.1761	0.3681	0.3681	0.4983	BRD-K16077845	fentiazac
CTSL	MCF7	0.0599038	0.500959	0.044424	0.044424	0.518332	-0.0333	-0.3451	-0.1122	-0.4465	-0.4465	0.1245	BRD-K38744518	betulinic-acid
CTSL	HA1E	0.0600502	0.246073	0.0309793	0.0309793	0.309046	0.0294	-0.30785	-0.447	-0.447	-0.447	-0.5015	BRD-A93353767	isoconazole
CTSL	HA1E	0.0601048	0.87603	0.397696	0.397696	0.248485	0.0294	0.42495	-0.3529	0.3299	0.3299	0.4175	BRD-K30550578	PF-04620110
CTSL	HT29	0.0601091	0.608405	0.271449	0.271449	0.41523	-0.0918	0.3555	-0.2849	0.281	0.281	0.8573	BRD-K54006094	formoterol
CTSL	HT29	0.0601091	0.0127878	0.0172437	0.0172437	0.548967	-0.0918	-0.52125	-1.3779	-0.6136	-0.6136	-0.0558	BRD-K72005722	VT-464
CTSL	PC3	0.0603738	0.64174	0.026526	0.026526	0.916417	-0.0109	0.4136	0.1222	0.70625	0.70625	0.0486	BRD-K59524082	maribavir
CTSL	PC3	0.0604168	0.0825403	0.152515	0.152515	0.892665	-0.0109	-0.5407	-0.7931	-0.5467	-0.5467	0.0959	BRD-K36680103	omecamtiv-mecarbil
CTSL	HT29	0.0604385	0.18432	0.125919	0.125919	0.0874522	-0.0918	0.36825	1.2436	0.5444	0.5444	0.8769	BRD-K09471561	levofloxacin
CTSL	PC3	0.060517	0.460131	0.140271	0.140271	0.0609216	-0.0109	0.3412	0.9401	0.3412	0.3412	1.3015	BRD-K56851771	enzalutamide
CTSL	HA1E	0.0607257	0.607534	0.348224	0.348224	0.682336	0.0294	-0.213	0.07995	-0.213	-0.213	-0.02275	BRD-K41895714	AS-605240
CTSL	A375	0.0608266	0.322795	0.00960847	0.00960847	0.577807	0.0424	0.39135	1.2462	1.2462	1.2462	0.0217	BRD-A05457250	BAY-K8644
CTSL	PC3	0.0608353	0.87767	0.680141	0.680141	0.229984	-0.0109	-0.54895	-0.2175	0.0208	0.0208	-0.9066	BRD-A37704979	SB-203580
CTSL	HT29	0.0610186	0.603573	0.727579	0.727579	0.949574	-0.0918	-0.61195	-0.6822	-0.1823	-0.1823	0.0152	BRD-K93747373	HG-5-113-01
CTSL	HT29	0.061051	0.918527	0.460556	0.460556	0.46918	-0.0918	-0.6711	-0.1485	-0.3513	-0.3513	-0.4681	BRD-K73088654	floxuridine
CTSL	MCF7	0.0612378	0.990643	0.568983	0.568983	0.122266	-0.0333	0.41395	-0.0526	-0.0526	-0.0526	0.4061	BRD-K43723251	chenodiol
CTSL	MCF7	0.0612378	0.417362	0.166174	0.166174	0.189323	-0.0333	-0.53505	-0.6686	-0.664	-0.664	-0.5245	BRD-K15426076	iguratimod
CTSL	MCF7	0.0612378	0.0631168	0.0741593	0.0741593	0.624878	-0.0333	0.27965	1.0249	0.3331	0.3331	0.4315	BRD-K86892782	edoxudine
CTSL	MCF7	0.0614668	0.608684	0.530302	0.530302	0.257188	-0.0333	0.5628	0.3247	0.3247	0.3247	0.706	BRD-K88506063	KD-025
CTSL	PC3	0.0615099	0.72722	0.36566	0.36566	0.321439	-0.0109	-0.4107	-0.1477	-0.1974	-0.1974	-0.2753	BRD-A62525898	prednisone
CTSL	PC3	0.0616229	0.161423	0.0202905	0.0202905	0.513322	-0.0109	0.51775	0.483	0.653	0.653	1.0495	BRD-K07954936	2-iminobiotin
CTSL	HA1E	0.0618718	0.361816	0.722435	0.722435	0.345473	0.0294	0.51245	-0.2823	0.1732	0.1732	1.0017	BRD-K53061490	ozagrel
CTSL	PC3	0.0619487	0.0968801	0.0445645	0.0445645	0.684157	-0.0109	-0.44075	-0.573	-0.573	-0.573	-0.3297	BRD-K01039503	sofalcone
CTSL	A549	0.0619876	0.435348	0.542449	0.542449	0.422593	0.02615	-0.35845	0.0018	-0.0762	-0.0762	-0.308	BRD-K49055432	A-66
CTSL	PC3	0.0620233	0.586284	0.0319375	0.0319375	0.400583	-0.0109	-0.7088	-0.7088	-0.8362	-0.8362	0.5501	BRD-K11433652	aspirin
CTSL	PC3	0.0621052	0.0248402	0.0262951	0.0262951	0.146148	-0.0109	-0.5486	-1.1574	-0.9317	-0.9317	0.673	BRD-K15409150	penfluridol
CTSL	HCC515	0.0622026	0.243154	0.0113279	0.0113279	0.368843	-0.1524	0.2226	0.1525	0.8373	0.8373	0.2927	BRD-K81528515	nilotinib
CTSL	HT29	0.0622529	0.15775	0.174239	0.174239	0.413179	-0.0918	0.3323	0.8091	0.46	0.46	0.4394	BRD-K23499943	alvespimycin
CTSL	PC3	0.0623047	0.392787	0.0318915	0.0318915	0.91959	-0.0109	0.40715	0.3281	0.476	0.476	-0.161	BRD-K59331299	voglibose
CTSL	HA1E	0.0624775	0.100747	0.63342	0.63342	0.063245	0.0294	0.6395	0.7205	0.0229	0.0229	1.32015	BRD-K23363278	CYT-997
CTSL	MCF7	0.062493	0.616599	0.474332	0.474332	0.113783	-0.0333	-0.6443	-0.6544	-0.4656	-0.4656	-0.7502	BRD-K56810756	fomepizole
CTSL	HT29	0.0625022	0.129781	0.0632292	0.0632292	0.291439	-0.0918	-0.53125	-1.9177	-0.5651	-0.5651	0.7179	BRD-K22134346	simvastatin
CTSL	HEPG2	0.0625027	0.903715	0.118818	0.118818	0.97641	-0.17825	0.16425	-0.1105	0.0761	0.0761	-0.4109	BRD-K52751261	TAK-715
CTSL	HEPG2	0.0625027	0.221278	0.272277	0.272277	0.109713	-0.17825	0.23575	0.295	0.1765	0.1765	0.6745	BRD-K00337317	NU-7441
CTSL	A375	0.062519	0.963266	0.219711	0.219711	0.00749121	0.0424	-0.4642	-0.5139	-0.5139	-0.5139	-1.5406	BRD-K35189033	levonorgestrel
CTSL	PC3	0.0626479	0.916417	0.34881	0.34881	0.067837	-0.0109	0.26175	0.1208	0.1318	0.1318	1.2409	BRD-K17068645	bendamustine
CTSL	HT29	0.0628149	0.829059	0.113791	0.113791	0.893487	-0.0918	-0.4279	-0.3726	-0.4832	-0.4832	0.4117	BRD-K99252563	QL-XII-47
CTSL	MCF7	0.0628295	0.227071	0.512898	0.512898	0.686766	-0.0333	-0.7291	-1.3308	-0.5333	-0.5333	-0.7745	BRD-K32847255	GSK-J1
CTSL	MCF7	0.062995	0.667954	0.563351	0.563351	0.018591	-0.0333	-0.8792	0.4634	0.132	0.132	-1.1814	BRD-K94436377	diosmin
CTSL	HT29	0.0631566	0.0623033	0.176711	0.176711	0.795717	-0.0918	-0.3334	-1.0392	-0.3942	-0.3942	-0.2111	BRD-K30632436	CTB
CTSL	HT29	0.0631851	0.29925	0.18868	0.18868	0.369331	-0.0918	0.3188	0.3941	0.3941	0.3941	0.2435	BRD-K56558538	ambroxol
CTSL	HT29	0.0632422	0.0625812	0.415945	0.415945	0.0731334	-0.0918	0.33585	0.5448	0.2887	0.2887	1.1896	BRD-K96671969	PA-824
CTSL	HEPG2	0.0632639	0.667113	0.977889	0.977889	0.262295	-0.17825	0.39365	-0.2251	-0.2251	-0.2251	0.2909	BRD-K64857848	XMD-885
CTSL	A375	0.0633166	0.493989	0.707159	0.707159	0.120767	0.0424	-0.4566	0.7243	0.0705	0.0705	-1.065	BRD-K08547377	irinotecan
CTSL	HT29	0.0633852	0.30667	0.202344	0.202344	0.905219	-0.0918	-0.5268	-0.4685	-0.4685	-0.4685	-0.2273	BRD-K98530306	clonidine
CTSL	HT29	0.0635858	0.354247	0.594484	0.594484	0.969653	-0.0918	0.6857	1.2154	0.4646	0.4646	-0.5645	BRD-K77947974	fluspirilene
CTSL	PC3	0.0635999	0.268966	0.0839841	0.0839841	0.806551	-0.0109	0.40695	0.9516	0.4809	0.4809	-0.4442	BRD-K32218650	MBX-2982
CTSL	A549	0.0636106	0.771568	0.0780557	0.0780557	0.444978	0.02615	0.2141	-0.1274	0.39015	0.39015	-0.12475	BRD-A29901043	KIN001-127
CTSL	A375	0.0636783	0.216399	0.130242	0.130242	0.68066	0.0424	0.8164	0.9149	0.8544	0.8544	0.1852	BRD-K59573506	cyproterone-acetate
CTSL	HCC515	0.0637555	0.13611	0.0701931	0.0701931	0.978143	-0.1524	0.1992	0.275	0.275	0.275	-0.5764	BRD-A87137733	GSK-690693
CTSL	A375	0.0638731	0.0556497	0.0021744	0.0021744	0.846926	0.0424	0.5382	0.9689	0.8349	0.8349	0.4623	BRD-K70507123	doxofylline
CTSL	HT29	0.063902	0.749223	0.0133063	0.0133063	0.348374	-0.0918	-0.75065	-0.3817	-1.0457	-1.0457	0.562	BRD-K00603606	ticlopidine
CTSL	A375	0.0639065	0.194829	0.317352	0.317352	0.432506	0.0424	0.68055	-0.3798	0.7314	0.7314	1.3595	BRD-K32285926	AMG-208
CTSL	HA1E	0.0639109	0.10343	0.00983757	0.00983757	0.832792	0.0294	0.69685	0.6801	1.1186	1.1186	-0.6551	BRD-A17655518	ibuprofen
CTSL	HA1E	0.0639971	0.913393	0.58224	0.58224	0.521366	0.0294	-0.52795	-0.0069	-0.0069	-0.0069	-0.6036	BRD-K30480208	torasemide
CTSL	HA1E	0.0640833	0.121923	0.143441	0.143441	0.694165	0.0294	-0.2266	-1.1102	-0.4145	-0.4145	-0.1256	BRD-K91900765	VX-745
CTSL	PC3	0.064095	0.299046	0.156519	0.156519	0.448977	-0.0109	-0.3241	-0.2674	-0.2679	-0.2679	0.1777	BRD-K31313613	BS-181
CTSL	PC3	0.0644463	0.512357	0.369335	0.369335	0.781886	-0.0109	-0.623	0.6745	-0.6004	-0.6004	0.0748	BRD-K80343549	TAK-285
CTSL	A375	0.0644801	0.90484	0.381538	0.381538	0.0767735	0.0424	0.65715	0.2091	0.467	0.467	0.8243	BRD-K34154330	tracazolate
CTSL	MCF7	0.0645348	0.720912	0.153581	0.153581	0.507293	-0.0333	0.35355	0.2152	0.4919	0.4919	-0.1881	BRD-K46937689	phenazone
CTSL	HA1E	0.0647187	0.388033	0.357385	0.357385	0.121212	0.0294	0.4033	0.8672	0.2435	0.2435	0.4558	BRD-U64521890	XMD-16144
CTSL	HA1E	0.0648058	0.987043	0.0768095	0.0768095	0.422172	0.0294	-0.3616	0.248	-0.3693	-0.3693	-0.3539	BRD-K24844714	fluorouracil
CTSL	MCF7	0.064809	0.994269	0.0584691	0.0584691	0.621369	-0.0333	0.3693	-0.0459	0.3693	0.3693	-0.4209	BRD-K07106112	BMS-599626
CTSL	A375	0.064942	0.41603	0.0929961	0.0929961	0.330771	0.0424	-0.5329	-0.6308	-0.6308	-0.6308	0.9522	BRD-K34469523	levalbuterol
CTSL	A375	0.065058	0.352404	0.726149	0.726149	0.0163599	0.0424	-0.3798	-0.5178	-0.0627	-0.0627	-2.0364	BRD-A24396574	celastrol
CTSL	MCF7	0.0651016	0.234365	0.0372668	0.0372668	0.0199958	-0.0333	-0.4927	-0.72235	-0.54785	-0.54785	-1.52275	BRD-K80700417	SGI-1776
CTSL	HT29	0.0652681	0.997241	0.396153	0.396153	0.903653	-0.0918	0.6719	-0.0944	0.7839	0.7839	0.228	BRD-K16732600	MK-0893
CTSL	PC3	0.0653317	0.925146	0.981152	0.981152	0.0852254	-0.0109	0.4403	-0.2649	0.117	0.117	1.902	BRD-K62734952	arglabin
CTSL	PC3	0.0658636	0.787264	0.0597666	0.0597666	0.443904	-0.0109	0.4663	-0.0284	0.8432	0.8432	0.5707	BRD-K37714784	ABT-724
CTSL	PC3	0.0658677	0.302314	0.119633	0.119633	0.750605	-0.0109	-0.60935	-0.8025	-0.8025	-0.8025	0.0914	BRD-K47029922	tranylcypromine
CTSL	HA1E	0.0660052	0.560442	0.343625	0.343625	0.0771905	0.0294	-0.39	0.0015	-0.2583	-0.2583	-1.1194	BRD-K56104152	oxiconazole
CTSL	A375	0.0660794	0.394467	0.0339689	0.0339689	0.459996	0.0424	0.42695	0.3528	0.5171	0.5171	0.4734	BRD-K36732695	setiptiline
CTSL	A375	0.0660794	0.928945	0.138696	0.138696	0.167372	0.0424	-0.51255	0.2803	-0.4154	-0.4154	-1.4425	BRD-A38218502	metenkephalin
CTSL	HT29	0.0661229	0.924032	0.0515565	0.0515565	0.944461	-0.0918	0.2595	-0.1881	0.4222	0.4222	-0.181	BRD-K30126819	dimesna
CTSL	HEPG2	0.0662267	0.634207	0.30587	0.30587	0.278653	-0.17825	-0.6439	-0.5956	-0.5956	-0.5956	-0.7813	BRD-K53972329	ruxolitinib
CTSL	HA1E	0.0663005	0.134765	0.0442116	0.0442116	0.939197	0.0294	-0.3259	-0.8284	-0.8284	-0.8284	-0.172	BRD-A70858459	estramustine
CTSL	A375	0.0664032	0.929724	0.758601	0.758601	0.0587899	0.0424	-0.6363	0.1681	0.1681	0.1681	-0.8761	BRD-K21025364	NVP-TAE226
CTSL	PC3	0.0664073	0.378556	0.995403	0.995403	0.701121	-0.0109	0.5603	0.4054	0.2615	0.2615	0.6702	BRD-A58955223	sulforaphane
CTSL	A375	0.0665439	0.652791	0.685291	0.685291	0.391703	0.0424	0.8325	0.7767	-0.2346	-0.2346	1.2301	BRD-K53417444	OTS-167
CTSL	HEPG2	0.0665451	0.0296479	0.292964	0.292964	0.290755	-0.17825	0.35035	1.4842	0.1855	0.1855	1.0994	BRD-K01436366	XMD-1150
CTSL	HA1E	0.0666284	0.465886	0.720261	0.720261	0.414645	0.0294	-0.3916	-0.46255	-0.34905	-0.34905	-0.8519	BRD-A19500257	geldanamycin
CTSL	MCF7	0.0666488	0.626468	0.764548	0.764548	0.159745	-0.0333	0.4022	-0.19655	-0.2603	-0.2603	0.7746	BRD-K12502280	TG-101348
CTSL	HA1E	0.0666563	0.501741	0.0504096	0.0504096	0.611196	0.0294	0.4209	0.4546	0.4546	0.4546	-0.2561	BRD-A12077521	cefepime
CTSL	MCF7	0.0667132	0.189932	0.075475	0.075475	0.305453	-0.0333	-0.45185	-1.5176	-0.4956	-0.4956	-0.6866	BRD-K97729603	pimecrolimus
CTSL	A375	0.0669061	0.158223	0.0238402	0.0238402	0.074754	0.0424	-0.4627	-0.4632	-0.6454	-0.6454	-0.5772	BRD-K10852020	tolcapone
CTSL	A375	0.0670546	0.349873	0.847684	0.847684	0.433657	0.0424	0.5278	0.8933	-0.043	-0.043	0.3984	BRD-K92657060	zaleplon
CTSL	A375	0.0671439	0.323755	0.0782131	0.0782131	0.63251	0.0424	-0.36265	-0.6389	-0.3711	-0.3711	-0.3085	BRD-K56558538	ambroxol
CTSL	HA1E	0.0673135	0.0410375	0.75807	0.75807	0.198465	0.0294	-0.6015	1.49155	-0.03	-0.03	-1.00605	BRD-A69815203	cyclosporin-a
CTSL	MCF7	0.0673702	0.177443	0.659535	0.659535	0.379583	-0.0333	-0.3343	-0.8091	-0.0355	-0.0355	-0.2529	BRD-K19061412	mubritinib
CTSL	A375	0.067442	0.195336	0.0200146	0.0200146	0.569798	0.0424	0.5251	0.6804	0.6845	0.6845	0.4805	BRD-K56291712	voxtalisib
CTSL	MCF7	0.0674673	0.0948648	0.0267599	0.0267599	0.193307	-0.0333	0.2622	1.0346	0.3415	0.3415	-0.6392	BRD-K26818574	BIX-01294
CTSL	HA1E	0.0677933	0.282683	0.49056	0.49056	0.116786	0.0294	0.624	0.6297	0.6297	0.6297	0.9764	BRD-K04704168	clemizole
CTSL	A549	0.0678267	0.759867	0.142577	0.142577	0.113814	0.02615	0.26815	0.233	0.2796	0.2796	0.9007	BRD-K19687926	lapatinib
CTSL	HA1E	0.0679441	0.532294	0.534571	0.534571	0.481901	0.0294	0.6365	0.5468	0.5468	0.5468	0.189	BRD-K66175015	afatinib
CTSL	MCF7	0.0680549	0.782511	0.206441	0.206441	0.499812	-0.0333	-0.4092	-0.1185	-0.4241	-0.4241	-0.6769	BRD-K25311561	KU-55933
CTSL	HA1E	0.0680952	0.0589212	0.0472884	0.0472884	0.869052	0.0294	-0.43965	-0.8141	-0.6675	-0.6675	0.1772	BRD-K13154216	everolimus
CTSL	HA1E	0.0681087	0.622202	0.615925	0.615925	0.0407866	0.0294	0.5637	-0.449	-0.1727	-0.1727	0.85105	BRD-K71035033	masitinib
CTSL	HCC515	0.068109	0.0162712	0.581819	0.581819	0.0232971	-0.1524	0.54065	-1.6672	0.3137	0.3137	0.7748	BRD-K26838195	AST-1306
CTSL	HT29	0.0681395	0.0977634	0.715902	0.715902	0.196468	-0.0918	0.44275	-0.65885	-0.2523	-0.2523	0.5723	BRD-K78431006	crizotinib
CTSL	HT29	0.0681939	0.662644	0.512396	0.512396	0.841403	-0.0918	-0.2925	0.1713	-0.172	-0.172	-0.2579	BRD-K36386086	dolutegravir
CTSL	MCF7	0.0683377	0.298692	0.0318248	0.0318248	0.102883	-0.0333	0.4579	0.377	0.5388	0.5388	0.6929	BRD-A48237631	mitomycin-c
CTSL	PC3	0.0683556	0.480407	0.663331	0.663331	0.54372	-0.0109	0.39885	-0.5639	0.38	0.38	0.3147	BRD-A06916187	CPI-613
CTSL	HT29	0.0683867	0.31731	0.151699	0.151699	0.769534	-0.0918	-0.4107	-0.9734	-0.91595	-0.91595	-0.1687	BRD-K74763371	bosentan
CTSL	HT29	0.068529	0.133742	0.244844	0.244844	0.709131	-0.0918	-0.4489	0.4305	-0.6946	-0.6946	-0.2022	BRD-K04801023	SAR-245408
CTSL	PC3	0.0685406	0.253899	0.0630935	0.0630935	0.270049	-0.0109	0.3218	1.026	0.4968	0.4968	0.3892	BRD-K11973162	tipiracil
CTSL	HT29	0.068575	0.41693	0.109243	0.109243	0.0928918	-0.0918	0.3482	-0.0283	0.3482	0.3482	-0.7969	BRD-K88573743	A-443654
CTSL	MCF7	0.0685884	0.971934	0.286767	0.286767	0.139979	-0.0333	0.3638	-0.1725	0.2624	0.2624	0.562	BRD-K53328210	JW55
CTSL	HA1E	0.0685964	0.69926	0.456295	0.456295	0.328633	0.0294	0.4921	-0.0976	0.0407	0.0407	0.4921	BRD-K38287497	narlaprevir
CTSL	PC3	0.0686024	0.465002	0.0682889	0.0682889	0.627848	-0.0109	0.49735	0.5481	0.6779	0.6779	0.3801	BRD-A64406146	timofibrate
CTSL	A375	0.068656	0.068656	NA	0.068656	0.068656	0.0424	-0.8328	-0.8328	NA	-0.8328	-0.8328	BRD-A13254067	okadaic acid
CTSL	PC3	0.0686951	0.633176	0.0661785	0.0661785	0.0765415	-0.0109	-0.46795	0.0674	-0.6196	-0.6196	-1.2357	BRD-K56844688	epirubicin
CTSL	HA1E	0.0687071	0.3841	0.528731	0.528731	0.869356	0.0294	0.53215	-0.377	0.3282	0.3282	0.27865	BRD-K83963101	MLN-8054
CTSL	PC3	0.068757	0.0720026	0.0111071	0.0111071	0.196581	-0.0109	0.4358	0.8219	0.7085	0.7085	0.4248	BRD-A16296925	indobufen
CTSL	HT29	0.0688041	0.322841	0.0918125	0.0918125	0.799914	-0.0918	0.3494	0.3926	0.4227	0.4227	0.0109	BRD-K17894950	indirubin
CTSL	PC3	0.068974	0.371026	0.130694	0.130694	0.779585	-0.0109	0.2511	1.1577	0.5677	0.5677	0.1753	BRD-K71822263	D-serine
CTSL	HT29	0.0690494	0.0510466	0.0300189	0.0300189	0.291046	-0.0918	-0.6119	-0.835	-0.835	-0.835	-0.5791	BRD-K76810206	nicergoline
CTSL	A375	0.06916	0.917272	0.570973	0.570973	0.229227	0.0424	0.6037	0.0058	0.0058	0.0058	0.7244	BRD-K31731454	pemirolast
CTSL	HT29	0.0691607	0.772557	0.406379	0.406379	0.243968	-0.0918	0.37525	-0.0822	-0.0822	-0.0822	0.59555	BRD-A63675168	brivudine
CTSL	A375	0.0691624	0.215127	0.0483353	0.0483353	0.285916	0.0424	0.51545	1.0706	1.0675	1.0675	-0.4069	BRD-K25340465	OSI-930
CTSL	HA1E	0.0691911	0.82512	0.650895	0.650895	0.346229	0.0294	0.64435	0.3285	0.3285	0.3285	0.6142	BRD-A98845662	desvenlafaxine
CTSL	PC3	0.0692224	0.241432	0.0584114	0.0584114	0.14149	-0.0109	0.4839	0.5837	0.5338	0.5338	0.8333	BRD-A20131130	2',5'-dideoxyadenosine
CTSL	HCC515	0.0692767	0.277945	0.626684	0.626684	0.625778	-0.1524	0.39425	-0.8854	0.0512	0.0512	0.102	BRD-K78790801	KIN001-269
CTSL	A375	0.0693485	0.0256639	0.0853974	0.0853974	0.580489	0.0424	-0.6042	-1.1113	-0.6644	-0.6644	-0.1713	BRD-K43806473	camostat-mesilate
CTSL	HEPG2	0.0695893	0.421527	0.818542	0.818542	0.415343	-0.17825	0.4315	0.6588	-0.5036	-0.5036	-1.1137	BRD-K81418486	vorinostat
CTSL	HA1E	0.069652	0.0342908	0.283401	0.283401	0.236976	0.0294	-0.6547	-1.0436	-0.3575	-0.3575	-0.808	BRD-K49555808	BMS-707035
CTSL	A375	0.0696825	0.114082	0.927306	0.927306	0.181994	0.0424	-0.64065	1.0101	0.0114	0.0114	-0.8513	BRD-K84698278	agomelatine
CTSL	A375	0.0697132	0.323034	0.547787	0.547787	0.296667	0.0424	0.6389	0.7865	0.2411	0.2411	0.7095	BRD-K87782578	AVL-292
CTSL	A375	0.0697439	0.538948	0.303343	0.303343	0.00656229	0.0424	0.24395	0.2723	0.2723	0.2723	1.8788	BRD-K07572174	curcumin
CTSL	HA1E	0.0697444	0.0237394	0.0273744	0.0273744	0.496118	0.0294	0.29565	1.0429	0.8348	0.8348	0.214	BRD-K58010567	vilazodone
CTSL	HT29	0.0698827	0.822517	0.543679	0.543679	0.168214	-0.0918	0.20775	0.1915	0.1915	0.1915	0.5852	BRD-A22642447	licarbazepine
CTSL	HA1E	0.0698988	0.893125	0.573128	0.573128	0.238737	0.0294	0.5743	0.5762	0.5724	0.5724	0.5569	BRD-K61195623	combretastatin-A-4
CTSL	HT29	0.0699146	0.112858	0.0840314	0.0840314	0.461329	-0.0918	0.33505	4.2296	0.798	0.798	-0.5357	BRD-K60160658	tiagabine
CTSL	HA1E	0.0699915	0.0330563	0.24051	0.24051	0.870602	0.0294	0.4779	1.036	0.4705	0.4705	0.313	BRD-K24515980	QL-XI-92
CTSL	MCF7	0.0700514	0.988484	0.725519	0.725519	0.060599	-0.0333	-0.52925	-0.3928	-0.3928	-0.3928	-0.8698	BRD-K82234479	tramiprosate
CTSL	A375	0.0700515	0.0236291	0.0361693	0.0361693	0.206199	0.0424	0.47205	1.3246	0.7154	0.7154	0.5479	BRD-K83837640	JNJ-26481585
CTSL	HA1E	0.0701773	0.597805	0.61037	0.61037	0.0382334	0.0294	0.3165	0.3186	0.2625	0.2625	0.9679	BRD-K96029467	alagebrium
CTSL	PC3	0.0702035	NA	NA	NA	NA	-0.0109	-0.6745	NA	NA	NA	NA	BRD-K27305650	LY-294002
CTSL	A375	0.0702057	0.0634601	0.720645	0.720645	0.0124968	0.0424	-0.3437	-0.6523	-0.1205	-0.1205	-1.305	BRD-K67578145	GDC-0879
CTSL	A549	0.0702203	0.145926	0.512796	0.512796	0.092914	0.02615	-0.54405	-0.9074	-0.4077	-0.4077	-0.6656	BRD-K88573743	A-443654
CTSL	MCF7	0.0702787	0.185999	0.00484654	0.00484654	0.497522	-0.0333	0.2427	0.278	0.9284	0.9284	0.2074	BRD-K91456750	sacubitril
CTSL	HCC515	0.0702907	0.0216802	0.563667	0.563667	0.947573	-0.1524	0.39545	1.1565	0.2745	0.2745	-0.2128	BRD-K76694128	rebastinib
CTSL	A375	0.0702984	0.00650422	0.0371085	0.0371085	0.15621	0.0424	-0.4471	-1.4061	-0.5258	-0.5258	-0.3819	BRD-K31313613	BS-181
CTSL	HA1E	0.0703014	0.26289	0.430443	0.430443	0.330831	0.0294	-0.3159	0.1551	0.1017	0.1017	-0.354	BRD-K23728141	tafamidis-meglumine
CTSL	A375	0.0703611	0.807232	0.131955	0.131955	0.915717	0.0424	-0.4202	-0.4432	-0.46515	-0.46515	-0.0769	BRD-K92984783	melperone
CTSL	MCF7	0.0703641	0.432016	0.584431	0.584431	0.143155	-0.0333	0.48395	-0.3659	0.4679	0.4679	0.633	BRD-K60585088	paricalcitol
CTSL	A375	0.0703911	0.283269	0.14987	0.14987	0.265631	0.0424	-0.29975	-0.2488	-0.2488	-0.2488	-0.499	BRD-K89208535	indacaterol
CTSL	MCF7	0.0705923	0.143279	0.0555074	0.0555074	0.614061	-0.0333	0.4818	0.7224	0.6298	0.6298	-0.3002	BRD-K67080878	milrinone
CTSL	HA1E	0.0707531	0.188027	0.107757	0.107757	0.624889	0.0294	0.4807	0.4807	0.5677	0.5677	0.72995	BRD-K55127134	fluphenazine
CTSL	PC3	0.0707933	0.0277431	0.21605	0.21605	0.308445	-0.0109	0.53005	1.4793	0.5034	0.5034	0.5567	BRD-K02404261	caffeine
CTSL	PC3	0.0707933	0.336793	0.332749	0.332749	0.0584837	-0.0109	0.49375	-0.2211	-0.0719	-0.0719	0.9168	BRD-K69726342	atorvastatin
CTSL	HT29	0.0708495	0.0911753	0.361754	0.361754	0.232411	-0.0918	-0.44115	-0.6299	-0.4192	-0.4192	-1.3478	BRD-K63712959	temoporfin
CTSL	HT29	0.0708495	0.927957	0.401247	0.401247	0.61256	-0.0918	0.36765	-0.3474	0.1224	0.1224	0.1002	BRD-K51333959	siramesine
CTSL	HT29	0.0709437	0.832912	0.116286	0.116286	0.568235	-0.0918	-0.5716	0.0019	-0.655	-0.655	0.1734	BRD-K15426076	iguratimod
CTSL	HEPG2	0.0709684	0.181536	0.25582	0.25582	0.290755	-0.17825	0.0404	0.7045	-0.0832	-0.0832	0.4539	BRD-K48488978	YM-201636
CTSL	MCF7	0.0709931	0.0115094	0.374749	0.374749	0.576563	-0.0333	0.6003	1.1951	0.8817	0.8817	0.0736	BRD-A85439007	idoxuridin
CTSL	A375	0.0711057	0.105066	0.0278603	0.0278603	0.796625	0.0424	-0.08515	-1.2569	-0.5879	-0.5879	0.2236	BRD-K73395020	ARP-101
CTSL	A375	0.0715122	0.317073	0.945053	0.945053	0.24756	0.0424	-0.28055	0.4443	0.2066	0.2066	-0.3219	BRD-K07859598	GW-5074
CTSL	HT29	0.0715821	0.417497	0.656594	0.656594	0.255185	-0.0918	0.2468	0.3327	0.0399	0.0399	0.0768	BRD-A17411484	carprofen
CTSL	HA1E	0.0715837	0.551199	0.765999	0.765999	0.796884	0.0294	0.2305	0.1828	0.0876	0.0876	0.2782	BRD-A26032986	zaldaride
CTSL	HT29	0.0715841	0.927955	0.65434	0.65434	0.834905	-0.0918	0.3088	-0.0426	-0.0538	-0.0538	0.1274	BRD-K42805893	osimertinib
CTSL	PC3	0.0716216	0.521731	0.408651	0.408651	0.534146	-0.0109	-0.64385	0.8951	-0.8272	-0.8272	0.094	BRD-K93747373	HG-5-113-01
CTSL	HA1E	0.0716783	0.502996	0.441473	0.441473	0.125525	0.0294	-0.47955	-0.5808	-0.4907	-0.4907	-0.4684	BRD-A34255068	rolipram
CTSL	A375	0.0717733	0.255664	0.101954	0.101954	0.200628	0.0424	-0.3176	-0.9997	-0.9799	-0.9799	-0.2041	BRD-K76694128	rebastinib
CTSL	HT29	0.0718591	0.849913	0.0828587	0.0828587	0.316116	-0.0918	0.3767	-0.1308	0.6941	0.6941	-0.0032	BRD-K81795818	exherin
CTSL	HT29	0.0719543	0.63352	0.0229778	0.0229778	0.843722	-0.0918	0.4463	0.0218	0.4195	0.4195	0.4731	BRD-K45252063	clofibrate
CTSL	HT29	0.0719861	0.696668	0.181503	0.181503	0.284326	-0.0918	0.1373	0.1688	0.1688	0.1688	0.5719	BRD-K44442813	pidotimod
CTSL	MCF7	0.0721193	0.928836	0.257493	0.257493	0.700754	-0.0333	-0.24305	-0.251	-0.251	-0.251	0.0619	BRD-K40870905	CT-7758
CTSL	A375	0.07226	0.916494	0.0862219	0.0862219	0.767655	0.0424	-0.2809	-0.0505	-0.5872	-0.5872	-0.2809	BRD-K59875992	FPL-62064
CTSL	HT29	0.0724288	0.439573	0.463248	0.463248	0.554271	-0.0918	0.1491	0.21105	0.1052	0.1052	0.0347	BRD-K99545815	PF-562271
CTSL	HA1E	0.0724396	0.392104	0.811415	0.811415	0.0576354	0.0294	0.4621	0.6557	0.244	0.244	1.36225	BRD-K79131256	albendazole
CTSL	A375	0.0724576	0.81407	0.434134	0.434134	0.017349	0.0424	-0.38875	0.2756	0	0	-1.4296	BRD-K46056750	AZD-7762
CTSL	HA1E	0.0725978	0.280923	0.183226	0.183226	0.167157	0.0294	0.3755	0.1543	0.1543	0.1543	0.6722	BRD-K32107296	temozolomide
CTSL	HT29	0.07272	0.343822	0.0266536	0.0266536	0.0356159	-0.0918	-0.5269	-0.4691	-0.5847	-0.5847	-1.0158	BRD-A28545468	selegiline
CTSL	HA1E	0.0728212	0.524568	0.189274	0.189274	0.160308	0.0294	0.5357	0.2174	0.5581	0.5581	0.4768	BRD-K57764956	cariprazine
CTSL	HT29	0.0728483	0.648725	0.895307	0.895307	0.0203056	-0.0918	0.46025	-0.0092	-0.3959	-0.3959	1.7784	BRD-A06935312	fusidic-acid
CTSL	HT29	0.0729446	0.924032	0.891478	0.891478	0.621605	-0.0918	0.3662	0.0202	-0.0185	-0.0185	0.5924	BRD-A29520968	acifran
CTSL	HA1E	0.0730451	0.559779	0.640711	0.640711	0.653917	0.0294	0.4646	-0.0502	0.0879	0.0879	0.4581	BRD-K97643133	amiprilose
CTSL	HA1E	0.0731733	0.855901	0.0731005	0.0731005	0.244075	0.0294	-0.4658	0.3907	-0.573	-0.573	-1.0219	BRD-A84575140	pimobendan
CTSL	A375	0.0731757	0.453814	0.0293618	0.0293618	0.923496	0.0424	0.3053	0.4241	0.6582	0.6582	0.3053	BRD-A28545468	selegiline
CTSL	A375	0.0732086	0.346348	0.355374	0.355374	0.613801	0.0424	0.6112	0.6448	0.2242	0.2242	0.5997	BRD-K19939891	TIC10
CTSL	PC3	0.0732367	0.975282	0.24774	0.24774	0.532176	-0.0109	0.5418	0.0719	0.3461	0.3461	-0.6006	BRD-A33697453	fenticonazole
CTSL	HT29	0.0733579	0.682835	0.220125	0.220125	0.961776	-0.0918	0.4658	-0.1897	0.2925	0.2925	-0.1808	BRD-K76210423	resiquimod
CTSL	HEPG2	0.0735281	0.364974	0.0518124	0.0518124	0.382299	-0.17825	0.03875	0.2534	0.3625	0.3625	0.2002	BRD-K82484347	GSK-J2
CTSL	MCF7	0.0735845	0.427799	0.658029	0.658029	0.390441	-0.0333	-0.4994	0.412	-0.3623	-0.3623	-0.1638	BRD-K14175878	MK-0812
CTSL	HA1E	0.0735864	0.044247	0.233638	0.233638	0.300927	0.0294	0.2997	0.9255	0.7485	0.7485	0.1794	BRD-K87909389	alvocidib
CTSL	HT29	0.0737837	0.44703	0.266515	0.266515	0.155475	-0.0918	0.29035	0.2865	0.2865	0.2865	0.6307	BRD-K56810756	fomepizole
CTSL	PC3	0.073891	0.899782	0.323378	0.323378	0.179813	-0.0109	0.22295	0.2783	0.22295	0.22295	0.9061	BRD-K47000838	cytochalasin-b
CTSL	PC3	0.073891	0.490411	0.0426552	0.0426552	0.690777	-0.0109	0.5682	0.3498	0.572	0.572	0.5644	BRD-A76747559	rutin
CTSL	HT29	0.0739913	0.769534	0.287529	0.287529	0.0352706	-0.0918	0.5282	0.2463	0.257	0.257	0.9705	BRD-A78195072	imexon
CTSL	PC3	0.0741104	NA	NA	NA	NA	-0.0109	0.2538	NA	NA	NA	NA	BRD-A61304759	tanespimycin
CTSL	HA1E	0.0741128	0.10919	0.147147	0.147147	0.321328	0.0294	-0.10395	-1.12045	-0.20885	-0.20885	-0.5826	BRD-K68747584	PF-03814735
CTSL	MCF7	0.0741179	0.37108	0.487279	0.487279	0.415293	-0.0333	-0.49775	-0.7255	0.1644	0.1644	-0.6543	BRD-K84748119	vicriviroc
CTSL	MCF7	0.0742071	0.639641	0.0260541	0.0260541	0.726322	-0.0333	0.67745	0.0321	0.6928	0.6928	-0.0451	BRD-K75295174	alisertib
CTSL	A375	0.0742174	0.949994	0.534512	0.534512	0.147257	0.0424	-0.32755	-0.1589	-0.1589	-0.1589	-0.9692	BRD-A11319535	beclomethasone-dipropionate
CTSL	HEPG2	0.0742234	0.761305	0.279059	0.279059	0.409212	-0.17825	0.154	-0.0181	0.0828	0.0828	-0.6863	BRD-A90451247	KU-60019
CTSL	MCF7	0.0742317	0.218175	0.164746	0.164746	0.48955	-0.0333	0.2472	0.7992	0.2472	0.2472	0.0854	BRD-K63178091	telotristat
CTSL	A375	0.0743467	0.452296	0.275331	0.275331	0.960923	0.0424	0.222	-0.1466	0.1654	0.1654	-0.1864	BRD-A33711280	metixene
CTSL	HA1E	0.0743682	0.744213	0.237455	0.237455	0.214371	0.0294	0.54685	0.6458	0.6458	0.6458	0.6328	BRD-K53857191	risperidone
CTSL	HCC515	0.074469	0.245373	0.155159	0.155159	0.754787	-0.1524	0.3882	0.2862	0.4628	0.4628	-0.2196	BRD-U51024685	HG-6-64-01
CTSL	HEPG2	0.074573	0.109713	0.169136	0.169136	0.373574	-0.17825	0.1068	0.7025	0.0403	0.0403	-0.2384	BRD-K24515980	QL-XI-92
CTSL	MCF7	0.0747846	0.190848	0.0278496	0.0278496	0.866166	-0.0333	0.3457	1.1353	0.6281	0.6281	-0.19395	BRD-K01292756	pimozide
CTSL	PC3	0.0749478	0.432097	0.0242992	0.0242992	0.140411	-0.0109	0.2873	0.0962	0.8104	0.8104	-1.1852	BRD-K65678996	nefiracetam
CTSL	HT29	0.075123	0.0572776	0.406058	0.406058	0.0585836	-0.0918	0.4361	1.0815	-0.1701	-0.1701	0.7139	BRD-K71221037	birinapant
CTSL	MCF7	0.0753146	0.0191856	0.0878539	0.0878539	0.838448	-0.0333	0.2892	1.1812	0.2583	0.2583	0	BRD-A09349126	norethindrone
CTSL	PC3	0.0754809	0.134328	0.0833662	0.0833662	0.855654	-0.0109	-0.3948	-0.5257	-0.4114	-0.4114	-0.1816	BRD-K57631554	5-aminolevulinic-acid
CTSL	PC3	0.0755477	0.398905	0.316338	0.316338	0.429174	-0.0109	-0.38155	0.6449	-0.5506	-0.5506	-0.9141	BRD-K67578145	GDC-0879
CTSL	PC3	0.0756302	0.530965	0.0781833	0.127513	0.999512	-0.0109	0.4638	0.47275	0.428	0.428	0.01265	BRD-K68552125	phorbol-myristate-acetate
CTSL	HT29	0.0756841	0.101867	0.110319	0.110319	0.161011	-0.0918	0.3544	0.9927	0.9085	0.9085	0.1829	BRD-K01577834	adenosine
CTSL	HA1E	0.075718	0.328854	0.362408	0.362408	0.105068	0.0294	0.3252	0.7997	0.24135	0.24135	0.69165	BRD-K11267252	alectinib
CTSL	A375	0.0761671	0.555476	0.234367	0.234367	0.0538586	0.0424	0.30605	-0.1408	0.25185	0.25185	1.27105	BRD-K72414522	AZD-5438
CTSL	HA1E	0.0763064	0.64048	0.841468	0.841468	0.150576	0.0294	0.4456	-0.5947	0.1555	0.1555	1.095	BRD-A05334458	lisofylline
CTSL	HA1E	0.0763064	0.806014	0.110897	0.110897	0.790054	0.0294	0.39945	-0.3332	0.8823	0.8823	0.1151	BRD-A97437073	rosiglitazone
CTSL	HA1E	0.0763728	0.549228	0.314397	0.314397	0.304852	0.0294	0.34595	-0.2981	0.2875	0.2875	0.7487	BRD-K86118762	linsitinib
CTSL	A375	0.0765737	0.124656	0.515728	0.515728	0.312826	0.0424	-0.4126	-1.2919	-0.3074	-0.3074	-0.3449	BRD-K12737986	veliparib
CTSL	PC3	0.0765901	0.188059	0.269344	0.269344	0.76658	-0.0109	-0.2911	-0.6439	-0.2815	-0.2815	0.1508	BRD-A14966924	alaproclate
CTSL	HA1E	0.0766389	0.335008	0.0330929	0.0330929	0.838941	0.0294	0.50325	0.4792	1.0777	1.0777	0.3359	BRD-K99504665	goserelin-acetate
CTSL	A375	0.0766732	0.726467	0.350689	0.350689	0.749384	0.0424	-0.24975	-0.4991	-0.3658	-0.3658	0.8454	BRD-K88429204	pyrimethamine
CTSL	MCF7	0.0767714	0.502107	0.298455	0.298455	0.0826205	-0.0333	0.4568	0.4162	0.4162	0.4162	-1.5216	BRD-K24576554	AT-9283
CTSL	HT29	0.0768165	0.81292	0.328443	0.328443	0.881778	-0.0918	-0.5077	-0.0563	-0.4407	-0.4407	-0.3523	BRD-K70792160	10-DEBC
CTSL	PC3	0.076827	0.180138	0.150542	0.150542	0.53612	-0.0109	-0.38345	-0.4309	-0.4309	-0.4309	-0.106	BRD-K97884852	malotilate
CTSL	HT29	0.07685	0.717237	0.0491456	0.0491456	0.711338	-0.0918	-0.45055	0.0844	-0.5639	-0.5639	-0.0459	BRD-K15592317	CP-466722
CTSL	A375	0.0771286	0.195167	0.45568	0.45568	0.722059	0.0424	-0.2342	-0.7584	0.1061	0.1061	0.0509	BRD-K21908111	AZD-1208
CTSL	PC3	0.0771666	0.0571646	0.00509593	0.00509593	0.794964	-0.0109	-0.33935	-0.9918	-0.7659	-0.7659	0.5327	BRD-K78790801	KIN001-269
CTSL	HCC515	0.077182	0.115172	0.094718	0.094718	0.0264723	-0.1524	-0.5425	-1.2593	-0.6447	-0.6447	-1.5463	BRD-K88573743	A-443654
CTSL	HA1E	0.0773747	0.154812	0.0717927	0.0717927	0.381841	0.0294	0.5465	0.9547	0.6455	0.6455	0.6239	BRD-K78010432	furosemide
CTSL	HA1E	0.0775091	0.513089	0.449255	0.449255	0.0149917	0.0294	0.59695	-0.2522	0.4191	0.4191	1.4943	BRD-K57432881	tiapride
CTSL	A375	0.0775398	0.050131	0.0597152	0.0597152	0.815591	0.0424	0.41775	0.9261	0.9261	0.9261	-0.0164	BRD-K32821942	azathioprine
CTSL	PC3	0.0775969	0.973688	0.870106	0.870106	0.0757143	-0.0109	-0.3931	-0.0337	0.0074	0.0074	-0.8874	BRD-K90789829	nefazodone
CTSL	MCF7	0.0776661	0.128606	0.147938	0.147938	0.714107	-0.0333	0.4108	0.7388	0.51365	0.51365	0.1803	BRD-K66937583	lodoxamide
CTSL	MCF7	0.0776935	0.0724752	0.650333	0.650333	0.157473	-0.0333	0.58255	0.6394	0.4376	0.4376	1.0201	BRD-K04264130	favipiravir
CTSL	HCC515	0.0777341	0.921431	0.219829	0.219829	0.629665	-0.1524	0.26175	-0.6081	0.2662	0.2662	-0.2941	BRD-K86856088	UNC-0638
CTSL	HA1E	0.0778122	0.339966	0.794519	0.794519	0.745702	0.0294	-0.31045	0.2202	0.0878	0.0878	-0.0392	BRD-K23677682	voreloxin
CTSL	HA1E	0.0778459	0.81288	0.0515897	0.0515897	0.717567	0.0294	0.4287	0.1345	0.6294	0.6294	-0.3837	BRD-K18678457	ZD-7288
CTSL	HT29	0.0779206	0.961776	0.16741	0.16741	0.0768489	-0.0918	-0.5289	0.3005	-0.5845	-0.5845	-1.0276	BRD-K75958547	pitavastatin
CTSL	MCF7	0.0779409	0.800582	0.95686	0.95686	0.411686	-0.0333	0.4708	-0.5029	-0.2846	-0.2846	0.4087	BRD-K98004573	rupatadine
CTSL	HA1E	0.077981	0.184096	0.952943	0.952943	0.117823	0.0294	-0.31395	0.4665	0.335	0.335	-0.6613	BRD-K82767007	dazoxiben
CTSL	HT29	0.0779967	0.891143	0.997046	0.997046	0.316593	-0.0918	0.24195	-0.0283	-0.1531	-0.1531	0.0304	BRD-K48068743	teneligliptin
CTSL	A375	0.0780435	0.858838	0.22647	0.22647	0.668846	0.0424	0.4082	0	0.45	0.45	-0.2098	BRD-A35869383	ibrutinib
CTSL	MCF7	0.0780959	0.749461	0.93595	0.93595	0.0450153	-0.0333	0.0269	-0.2049	-0.104	-0.104	1.9074	BRD-K55127134	fluphenazine
CTSL	PC3	0.0781849	0.684815	0.66316	0.66316	0.0529862	-0.0109	-0.4291	-0.21475	-0.1713	-0.1713	-0.8554	BRD-K60240222	carglumic-acid
CTSL	A375	0.0782791	0.479258	0.497296	0.497296	0.765037	0.0424	-0.5002	-0.2569	-0.3017	-0.3017	-0.5647	BRD-K42948882	AMD-11070
CTSL	A375	0.0783138	0.161132	0.0472545	0.0472545	0.873623	0.0424	-0.4977	-1.0188	-0.6456	-0.6456	0.1657	BRD-K09372874	merimepodib
CTSL	HT29	0.0783706	0.015713	0.140328	0.140328	0.541089	-0.0918	0.53755	1.4749	0.7183	0.7183	0.3479	BRD-K38744518	betulinic-acid
CTSL	MCF7	0.0784065	0.725645	0.548175	0.548175	0.0290261	-0.0333	0.36495	0.049	0.2717	0.2717	1.0068	BRD-A75305484	anidulafungin
CTSL	A375	0.0784145	0.262279	0.720434	0.720434	0.0615293	0.0424	-0.5521	0.6225	-0.1362	-0.1362	-0.5601	BRD-K43410529	MLN-2480
CTSL	HCC515	0.0784249	0.553991	0.115185	0.115185	0.100205	-0.1524	0.2413	0.2358	0.2358	0.2358	0.4699	BRD-K01567962	pyrazolanthrone
CTSL	HEPG2	0.0785083	0.415343	0.426006	0.426006	0.895204	-0.17825	-0.83055	-0.7505	-0.7505	-0.7505	-0.0446	BRD-K26818574	BIX-01294
CTSL	HA1E	0.0787433	0.963495	0.625361	0.625361	0.25831	0.0294	0.3197	-0.4445	-0.2935	-0.2935	-0.55275	BRD-K92241597	tosedostat
CTSL	HT29	0.0787802	0.705457	0.469566	0.469566	0.0715645	-0.0918	0.3274	-0.3083	0.0255	0.0255	0.6402	BRD-A92800748	tie2-kinase-inhibitor
CTSL	HT29	0.0788144	0.863099	0.129985	0.129985	0.0489675	-0.0918	0.35515	0.3007	0.4096	0.4096	0.7643	BRD-K60038276	irbesartan
CTSL	HT29	0.0788486	0.0962047	0.845754	0.845754	0.050695	-0.0918	-0.7885	-0.9923	-0.139	-0.139	-1.0565	BRD-K93255255	indoximod
CTSL	PC3	0.0788829	0.0238292	0.109447	0.109447	0.198318	-0.0109	-0.46915	-1.3672	-0.682	-0.682	-0.6672	BRD-K49840922	etofylline-clofibrate
CTSL	HA1E	0.0789318	0.947813	0.285187	0.285187	0.138134	0.0294	-0.4469	-0.0689	-0.1768	-0.1768	-1.7965	BRD-K03194791	roflumilast
CTSL	HT29	0.0790199	0.412407	0.258989	0.258989	0.173305	-0.0918	-0.65295	-0.7608	-0.7608	-0.7608	-0.6589	BRD-K52818472	ivacaftor
CTSL	MCF7	0.0791249	0.821567	0.322008	0.322008	0.198925	-0.0333	0.4157	-0.2902	0.3759	0.3759	0.1705	BRD-K69688083	mestinon
CTSL	MCF7	0.0791369	0.0653244	0.0274092	0.0274092	0.472703	-0.0333	0.5517	0.9951	0.9414	0.9414	0.5517	BRD-K78010432	furosemide
CTSL	HCC515	0.0792223	0.489929	0.0284976	0.0284976	0.426886	-0.1524	-1.0104	-1.1865	-1.111	-1.111	-0.9307	BRD-K56751279	Y-39983
CTSL	A375	0.0793312	0.156353	0.722126	0.722126	0.00633275	0.0424	0.3537	-0.7588	-0.0239	-0.0239	1.7683	BRD-A37288617	amfepramone
CTSL	PC3	0.0793342	0.670263	0.722204	0.722204	0.275513	-0.0109	0.51525	-0.1964	-0.1534	-0.1534	0.5573	BRD-K91336023	mesulergine
CTSL	PC3	0.0793627	0.130726	0.224994	0.224994	0.422206	-0.0109	0.0554	0.9216	0.7682	0.7682	0.0174	BRD-K39252998	atipamezole
CTSL	A375	0.0794273	0.116173	0.121808	0.121808	0.465099	0.0424	-0.3665	-0.55655	-0.4276	-0.4276	-0.3865	BRD-K78431006	crizotinib
CTSL	HT29	0.0794323	0.666951	0.370363	0.370363	0.288345	-0.0918	0.34055	0.5679	0.2451	0.2451	0.576	BRD-A20239487	atenolol-(+/-)
CTSL	A375	0.0794336	0.279331	0.575589	0.575589	0.132035	0.0424	0.26895	0.6561	0.2371	0.2371	2.3695	BRD-K07609981	dexloxiglumide
CTSL	A549	0.0794734	0.652843	0.364769	0.364769	0.273404	0.02615	-0.33495	0.07735	-0.31005	-0.31005	-0.36875	BRD-K94335714	MC1568
CTSL	A375	0.0795264	0.384682	0.157572	0.157572	0.477888	0.0424	0.3711	-0.23905	0.2613	0.2613	0.4514	BRD-K50168500	canertinib
CTSL	HA1E	0.0796167	0.783619	0.322794	0.322794	0.207904	0.0294	-0.46325	-0.027	-0.3949	-0.3949	-0.5898	BRD-A88138582	halcinonide
CTSL	HA1E	0.0797542	0.154242	0.0358763	0.0358763	0.239129	0.0294	0.4246	0.5423	0.5423	0.5423	-0.82	BRD-K96042922	etanidazole
CTSL	MCF7	0.079817	0.416844	0.197795	0.197795	0.692748	-0.0333	0.40025	0.5981	0.5352	0.5352	-0.1753	BRD-K11973162	tipiracil
CTSL	MCF7	0.0798486	0.165714	0.065847	0.065847	0.14156	-0.0333	-0.41045	-0.4961	-0.4566	-0.4566	-0.9565	BRD-K67277431	picotamide
CTSL	HEPG2	0.0800046	0.415343	0.0476655	0.0476655	0.596405	-0.17825	0.1603	0.0033	0.62585	0.62585	0.1603	BRD-A10523515	GSK-429286A
CTSL	MCF7	0.0800066	0.649348	0.338016	0.338016	0.184801	-0.0333	-0.4615	0.1691	-0.5451	-0.5451	-1.4845	BRD-K32744045	disulfiram
CTSL	HT29	0.0801943	0.119222	0.864842	0.864842	0.986074	-0.0918	0.0994	0.3116	-0.1987	-0.1987	-0.1607	BRD-K87909389	alvocidib
CTSL	PC3	0.0802079	0.75896	0.723931	0.723931	0.474212	-0.0109	0.52915	0.0772	0.0772	0.0772	0.5487	BRD-K29968218	KX2-391
CTSL	PC3	0.0802079	0.314657	0.0332495	0.0332495	0.187055	-0.0109	-0.1891	-0.378	-0.378	-0.378	-1.704	BRD-K94335714	MC1568
CTSL	HT29	0.0802969	0.719453	0.228157	0.228157	0.490679	-0.0918	0.45805	-0.1295	0.4823	0.4823	0.654	BRD-K98769987	flumazenil
CTSL	PC3	0.0805129	0.249492	0.848979	0.848979	0.281721	-0.0109	0.3333	0.6591	0.3298	0.3298	0.1767	BRD-A39390670	rabeprazole
CTSL	PC3	0.0805244	0.52238	0.0132997	0.0132997	0.891875	-0.0109	0.109	-0.0204	1.1098	1.1098	0.2384	BRD-K16444452	ibudilast
CTSL	HT29	0.0805501	0.385848	0.400898	0.400898	0.0092817	-0.0918	0.3295	0.33555	0.31685	0.31685	0.8793	BRD-K52751261	TAK-715
CTSL	MCF7	0.0806731	0.364125	0.232692	0.232692	0.256053	-0.0333	0.2915	0.3731	0.3731	0.3731	0.4885	BRD-K62965247	tipifarnib-P2
CTSL	MCF7	0.0807886	0.200647	0.336399	0.336399	0.716816	-0.0333	0.3735	-0.53825	0.22785	0.22785	0.28205	BRD-K85402309	dovitinib
CTSL	PC3	0.0808419	0.327822	0.179793	0.179793	0.157863	-0.0109	0.4191	0.4511	0.3871	0.3871	-0.8965	BRD-K12502280	TG-101348
CTSL	A549	0.0809859	0.683178	0.438796	0.438796	0.102943	0.02615	0.3829	-0.4964	0.2995	0.2995	0.7442	BRD-K20696416	NVP-AEW541
CTSL	MCF7	0.0809936	0.700139	0.349196	0.349196	0.243254	-0.0333	0.3862	0.2261	0.4567	0.4567	0.3862	BRD-K59632282	quinidine
CTSL	A375	0.0810069	0.826539	0.747862	0.747862	0.548302	0.0424	0.4848	0.00255	0.00255	0.00255	0.1729	BRD-K42805893	osimertinib
CTSL	A375	0.0810623	0.505194	0.857652	0.857652	0.810728	0.0424	-0.5232	-0.5232	0.4857	0.4857	0.1769	BRD-K31342827	bisindolylmaleimide
CTSL	MCF7	0.081088	0.994962	0.240416	0.240416	0.982007	-0.0333	0.42395	0.2423	0.436	0.436	0.1093	BRD-A31811760	miltefosine
CTSL	HT29	0.0812394	0.0798627	0.0726985	0.0726985	0.943675	-0.0918	0.3274	0.8815	0.8078	0.8078	0.0592	BRD-K87156652	carbimazole
CTSL	A375	0.0812769	0.707433	0.0380227	0.0380227	0.707433	0.0424	0.6694	-0.1054	0.92005	0.92005	-0.4933	BRD-K07237224	moclobemide
CTSL	MCF7	0.08128	0.794314	0.453546	0.453546	0.165576	-0.0333	0.23635	-0.2853	0.0098	0.0098	0.557	BRD-K97158071	droperidol
CTSL	A375	0.0813844	0.630677	0.805196	0.805196	0.540243	0.0424	0.372	-0.31805	-0.048	-0.048	0.2839	BRD-A23067620	itraconazole
CTSL	HT29	0.0815203	0.952329	0.385304	0.385304	0.104373	-0.0918	0.238	0.1087	0.1366	0.1366	0.8316	BRD-K48812570	macitentan
CTSL	MCF7	0.0816331	0.770067	0.830722	0.830722	0.0312903	-0.0333	0.6598	-0.3046	-0.3046	-0.3046	1.2413	BRD-K81144366	moxisylyte
CTSL	PC3	0.0816934	0.215204	0.474214	0.474214	0.10076	-0.0109	0.58415	0.8766	0.0541	0.0541	0.7081	BRD-K13296708	rimonabant
CTSL	MCF7	0.0816974	0.0861926	0.100899	0.100899	0.0916968	-0.0333	0.3823	2.3387	0.2572	0.2572	0.9919	BRD-K70505054	ranitidine
CTSL	A375	0.0817136	0.413228	0.0144177	0.0144177	0.150845	0.0424	0.4279	0.407	0.4953	0.4953	2.036	BRD-K66404838	nalbuphine
CTSL	PC3	0.0817291	0.117298	0.295386	0.295386	0.449276	-0.0109	0.7432	2.1258	0.4664	0.4664	1.1315	BRD-K51662849	ilomastat
CTSL	MCF7	0.0817296	0.510766	0.133259	0.133259	0.0809584	-0.0333	0.37495	0.4531	0.466	0.466	0.7044	BRD-K31092604	donitriptan
CTSL	HA1E	0.0821022	0.684017	0.36576	0.36576	0.0928385	0.0294	0.8753	-0.3358	-0.5977	-0.5977	0.8567	BRD-K52618540	inositol
CTSL	MCF7	0.0822135	0.0600441	0.347676	0.347676	0.359849	-0.0333	-0.6045	-0.6745	-0.6115	-0.6115	-0.8232	BRD-K11071038	ICI-162846
CTSL	HA1E	0.0822282	0.511821	0.621548	0.621548	0.306712	0.0294	-0.5122	-0.363	-0.363	-0.363	-0.6454	BRD-K28761891	ramelteon
CTSL	A375	0.0822743	0.733096	0.729119	0.729119	0.392837	0.0424	-0.37275	0.2154	-0.0133	-0.0133	-0.2872	BRD-K15976406	telbivudine
CTSL	MCF7	0.0822782	0.817359	0.762104	0.762104	0.0567439	-0.0333	-0.523	-0.546	-0.5	-0.5	-0.9496	BRD-K71281111	SNX-2112
CTSL	A375	0.0823094	0.488129	0.555527	0.555527	0.0609866	0.0424	-0.4901	0.6477	0.1203	0.1203	-1.2723	BRD-A45153512	bimatoprost
CTSL	MCF7	0.0823509	0.113166	0.647544	0.647544	0.792575	-0.0333	0.0055	0.6965	-0.0747	-0.0747	-0.1694	BRD-K10843433	phenylbutazone
CTSL	HA1E	0.0823582	0.530035	0.117012	0.117012	0.913393	0.0294	0.49395	0.4	0.547	0.547	0.1545	BRD-K47539947	tetradecylthioacetic-acid
CTSL	A375	0.0823798	0.0983081	0.405015	0.405015	0.0114019	0.0424	-0.3523	-0.7291	-0.3341	-0.3341	-1.4829	BRD-K34008116	dolasetron
CTSL	HT29	0.0826165	0.116263	0.0416105	0.0416105	0.687192	-0.0918	0.20755	0.4961	0.4961	0.4961	-0.007	BRD-K48300629	zonisamide
CTSL	HCC515	0.0826553	0.689152	0.669542	0.669542	0.238757	-0.1524	-0.62965	0.3943	-0.2285	-0.2285	-1.0682	BRD-K42436189	AZ-20
CTSL	PC3	0.0826601	0.230761	0.0109797	0.0109797	0.776519	-0.0109	-0.5703	-0.5659	-0.9591	-0.9591	0.3529	BRD-K68336408	tyrphostin-AG-1478
CTSL	A375	0.0829014	0.664215	0.460299	0.460299	0.283709	0.0424	-0.2053	-0.0481	-0.0481	-0.0481	-0.0607	BRD-K82677201	almitrine
CTSL	PC3	0.0829463	0.539407	0.395188	0.395188	0.380991	-0.0109	0.39375	0.4096	0.37745	0.37745	-0.2222	BRD-K64890080	BI-2536
CTSL	HA1E	0.0829717	0.148768	0.0432928	0.0432928	0.0234969	0.0294	0.33515	0.7623	0.6235	0.6235	1.178	BRD-K79501723	cyclizine
CTSL	MCF7	0.0829862	0.640563	0.307324	0.307324	0.78355	-0.0333	-0.3927	-0.42385	-0.2184	-0.2184	0.3069	BRD-K97056771	GNF-2
CTSL	HEPG2	0.0829923	0.186864	0.687779	0.687779	0.79428	-0.17825	0.7493	-1.267	0.0817	0.0817	-0.3029	BRD-K50168500	canertinib
CTSL	HT29	0.0831869	0.7328	0.987047	0.987047	0.035099	-0.0918	0.38815	0.2489	0.2489	0.2489	0.932	BRD-A03216249	mepivacaine
CTSL	HT29	0.0832625	0.315163	0.0892089	0.0892089	0.578327	-0.0918	-0.4752	-0.3222	-0.6129	-0.6129	-0.026	BRD-K91111634	rotigotine
CTSL	HT29	0.0832998	0.785443	0.669831	0.669831	0.268629	-0.0918	0.45875	-0.3955	-0.14745	-0.14745	0.1661	BRD-K74305673	IKK-2-inhibitor-V
CTSL	HA1E	0.0833069	0.635787	0.0840351	0.0840351	0.805264	0.0294	-0.1947	0.061	-0.2921	-0.2921	0.12015	BRD-K20285085	fostamatinib
CTSL	HT29	0.0833075	0.124057	0.0530665	0.0530665	0.429516	-0.0918	-0.6108	-0.93885	-0.91525	-0.91525	-0.6108	BRD-K20920669	cromoglicic-acid
CTSL	A375	0.0836184	0.672775	0.564465	0.564465	0.60625	0.0424	-0.14645	-0.0521	-0.0651	-0.0651	0.1478	BRD-A39935389	teroxirone
CTSL	PC3	0.083636	0.891085	0.796301	0.796301	0.16383	-0.0109	0.45175	0.0714	0.1474	0.1474	0.7189	BRD-A85439007	idoxuridin
CTSL	PC3	0.083636	0.172782	0.0504418	0.0504418	0.959346	-0.0109	0.38575	1.059	0.9237	0.9237	-0.0685	BRD-K68756823	FR-180204
CTSL	HA1E	0.0836849	0.84934	0.648037	0.648037	0.9345	0.0294	0.51215	-0.1781	0.1013	0.1013	-0.0935	BRD-K09078998	deforolimus
CTSL	PC3	0.0838135	0.82423	0.391582	0.391582	0.802858	-0.0109	-0.3703	-0.1001	-0.2477	-0.2477	-0.12735	BRD-K74065929	doramapimod
CTSL	HT29	0.0839044	0.664438	0.551074	0.551074	0.153188	-0.0918	0.3084	0.2747	-0.0985	-0.0985	0.3421	BRD-K29656036	MK-8245
CTSL	HA1E	0.0839715	0.77833	0.522139	0.522139	0.400875	0.0294	0.4799	-0.0699	0.3102	0.3102	0.5924	BRD-A95696066	nisoxetine
CTSL	A375	0.0840107	0.0849454	0.410133	0.410133	0.880049	0.0424	0.41565	1.0643	0.4057	0.4057	0.2564	BRD-U41416256	THZ-2-98-01
CTSL	PC3	0.0840728	0.689304	0.0824462	0.0824462	0.597682	-0.0109	-0.563	-0.4858	-0.6402	-0.6402	-0.6805	BRD-K24771047	ampalex
CTSL	PC3	0.0840728	0.378556	0.265368	0.265368	0.597682	-0.0109	0.33195	0.5292	0.1021	0.1021	0.3435	BRD-A52660433	tetrindole
CTSL	A549	0.0841347	0.809987	0.902915	0.902915	0.879469	0.02615	0.2873	-0.3092	-0.3092	-0.3092	-0.2431	BRD-K93918653	quizartinib
CTSL	HT29	0.0842615	0.107036	0.114219	0.114219	0.795336	-0.0918	0.2203	0.9959	0.10025	0.10025	0.2203	BRD-K40758068	efavirenz
CTSL	PC3	0.0843284	0.363854	0.504068	0.504068	0.321927	-0.0109	-0.39105	-0.1882	-0.1882	-0.1882	-0.6757	BRD-K02950022	BMS-299897
CTSL	A375	0.0843976	0.159988	0.00877734	0.00877734	0.689662	0.0424	0.5054	0.9451	1.24425	1.24425	0.2047	BRD-K96042922	etanidazole
CTSL	HT29	0.0845182	0.975957	0.461729	0.461729	0.0387624	-0.0918	0.33825	-0.1535	-0.1449	-0.1449	1.1824	BRD-K32405725	etomoxir
CTSL	A375	0.0845841	0.199939	0.0252062	0.0252062	0.182476	0.0424	0.44405	0.6658	0.6658	0.6658	-0.5902	BRD-K45245728	ursodeoxycholyltaurine
CTSL	HT29	0.0850264	0.87866	0.353123	0.353123	0.381574	-0.0918	0.20485	-0.1318	0.1541	0.1541	0.4614	BRD-K12609457	exalamide
CTSL	HA1E	0.0850536	0.737521	0.646406	0.646406	0.276121	0.0294	-0.3597	0.374	0.1669	0.1669	-0.811	BRD-A87137733	GSK-690693
CTSL	MCF7	0.0850663	0.458911	0.0255868	0.0255868	0.424129	-0.0333	0.74895	0.6284	0.9228	0.9228	0.8695	BRD-K43457670	acetazolamide
CTSL	A375	0.0851607	0.120034	0.156285	0.156285	0.719859	0.0424	0.5075	0.7076	0.5704	0.5704	0.0523	BRD-U22633929	XMD11-85H
CTSL	MCF7	0.0851993	0.519502	0.578371	0.578371	0.0233609	-0.0333	-0.5688	-1.2642	-0.2417	-0.2417	-1.2561	BRD-K15976406	telbivudine
CTSL	HT29	0.0852085	0.0646989	0.12368	0.12368	0.21658	-0.0918	0.3252	0.7752	0.7752	0.7752	0.2791	BRD-A70083328	secnidazole
CTSL	MCF7	0.0852922	0.150346	0.00978575	0.00978575	0.503833	-0.0333	0.4961	0.7503	0.80105	0.80105	-0.0284	BRD-K57569181	pentoxifylline
CTSL	HEPG2	0.085311	0.538158	0.48935	0.48935	0.0367311	-0.17825	0.2684	0.5783	0.1954	0.1954	0.4937	BRD-K32847255	GSK-J1
CTSL	A549	0.0855482	0.309673	0.278941	0.278941	0.575429	0.02615	0.42165	0.5089	0.5075	0.5075	0.3358	BRD-A87137733	GSK-690693
CTSL	A375	0.0855952	0.0357331	0.0146452	0.0146452	0.28947	0.0424	-0.37945	-0.9672	-0.9672	-0.9672	0.6074	BRD-A74914197	pralatrexate
CTSL	MCF7	0.0856998	0.464401	0.611149	0.611149	0.626795	-0.0333	0.21815	0.2276	0.2087	0.2087	0.1662	BRD-A82396632	miconazole
CTSL	MCF7	0.0857252	0.972794	0.70953	0.70953	0.00637138	-0.0333	-0.41	-0.16445	0.0896	0.0896	-0.8797	BRD-K56301217	ABT-737
CTSL	PC3	0.0858382	0.549372	0.40247	0.40247	0.174045	-0.0109	-0.23945	-0.046	-0.1438	-0.1438	-1.2113	BRD-A24228527	ofloxacin
CTSL	PC3	0.0858813	0.270198	0.861244	0.861244	0.208352	-0.0109	0.4968	0.6979	-0.04405	-0.04405	0.74515	BRD-A69275535	pinitol
CTSL	A375	0.0859222	0.218226	0.3322	0.3322	0.444962	0.0424	-0.29955	-0.2766	-0.2766	-0.2766	-0.3225	BRD-K51143828	lurasidone
CTSL	PC3	0.0860657	0.0381608	0.144225	0.144225	0.79631	-0.0109	-0.2744	-0.83285	-0.39245	-0.39245	0.02655	BRD-K20285085	fostamatinib
CTSL	HT29	0.086087	0.921678	0.153661	0.153661	0.0374765	-0.0918	0.35635	0.0968	0.3688	0.3688	1.3615	BRD-K74717603	etravirine
CTSL	MCF7	0.0861926	0.0861926	NA	0.0861926	0.0861926	-0.0333	-0.8116	-0.8116	NA	-0.8116	-0.8116	BRD-K74148702	curcumin
CTSL	MCF7	0.0864785	0.0659495	0.0108265	0.0108265	0.439566	-0.0333	-0.3067	-1.06895	-0.5924	-0.5924	-0.37275	BRD-K49669041	BX-912
CTSL	PC3	0.0864838	0.0214566	0.339805	0.339805	0.350029	-0.0109	-0.3639	-1.6383	-0.3841	-0.3841	-0.0735	BRD-K58010567	vilazodone
CTSL	HCC515	0.0866103	0.479654	0.0185952	0.0185952	0.758955	-0.1524	0.35555	0.7618	0.5806	0.5806	-0.1816	BRD-K50000283	PHA-767491
CTSL	MCF7	0.0867422	0.233025	0.0525562	0.0525562	0.288981	-0.0333	-0.4125	-0.672	-0.672	-0.672	-0.7821	BRD-K08037784	arbutin
CTSL	MCF7	0.0869107	0.0919575	0.103299	0.103299	0.895928	-0.0333	-0.1883	-1.0521	-0.3241	-0.3241	-0.0131	BRD-K16037980	Z160
CTSL	PC3	0.0869193	0.66372	0.544981	0.544981	0.229209	-0.0109	0.3125	-0.0976	0.0449	0.0449	0.2888	BRD-K61443650	thiomersal
CTSL	A375	0.0869832	0.224705	0.40725	0.40725	0.856145	0.0424	-0.4459	-1.1193	-0.4459	-0.4459	-0.0495	BRD-K34888156	theobromine
CTSL	PC3	0.0870543	NA	NA	NA	NA	-0.0109	-0.8341	NA	NA	NA	NA	BRD-K69608737	tacrolimus
CTSL	A375	0.0870564	0.954286	0.375269	0.375269	0.437117	0.0424	0.3501	0.2086	0.2086	0.2086	-0.6718	BRD-A26690767	saquinavir
CTSL	HEPG2	0.0870841	0.97641	0.976661	0.976661	0.0999316	-0.17825	0.23835	-0.2778	-0.0268	-0.0268	0.391	BRD-K22096725	ALW-II-49-7
CTSL	A549	0.0871143	0.185726	0.189511	0.189511	0.63208	0.02615	-0.5555	1.2809	-0.5559	-0.5559	0.2898	BRD-K72636697	QL-X-138
CTSL	HT29	0.0871212	0.191274	0.155145	0.155145	0.736522	-0.0918	0.2273	0.8174	0.2298	0.2298	0.1187	BRD-K76703230	YM-155
CTSL	A375	0.08713	0.0963302	0.0100673	0.0100673	0.261446	0.0424	0.58445	0.6398	0.8625	0.8625	1.1095	BRD-A96456596	FPL-55712
CTSL	HT29	0.0873441	0.508569	0.534458	0.534458	0.0381148	-0.0918	0.4391	-0.2394	-0.2328	-0.2328	1.3646	BRD-K50133271	tolfenamic-acid
CTSL	A375	0.0874618	0.789826	0.0506928	0.0506928	0.461187	0.0424	-0.2405	0.1726	-0.8719	-0.8719	-0.6323	BRD-K33610132	rociletinib
CTSL	A549	0.087622	0.0299452	0.507789	0.507789	0.0235918	0.02615	-0.6226	0.8746	0.1558	0.1558	-0.9508	BRD-K50000283	PHA-767491
CTSL	MCF7	0.0876498	0.0505955	0.103409	0.103409	0.618586	-0.0333	-0.2007	-1.3698	-0.2007	-0.2007	0.264	BRD-K86816506	PF-04457845
CTSL	HT29	0.0878925	0.265157	0.263147	0.263147	0.108441	-0.0918	-0.4025	-0.8556	-0.29045	-0.29045	-1.6462	BRD-K50422030	clomethiazole
CTSL	PC3	0.0879356	0.260404	0.0314344	0.0314344	0.792652	-0.0109	0.5817	0.3869	0.8567	0.8567	-0.4852	BRD-K62310379	fluticasone-propionate
CTSL	HCC515	0.08803	0.308111	0.128019	0.128019	0.242049	-0.1524	0.22395	0.1656	0.1763	0.1763	0.5331	BRD-K08799216	pelitinib
CTSL	HA1E	0.0880316	0.0521456	0.0728283	0.0728283	0.34497	0.0294	-0.35025	-1.2706	-0.3393	-0.3393	-0.3612	BRD-K67966701	lisinopril
CTSL	HT29	0.0880529	0.419771	0.19371	0.19371	0.738013	-0.0918	0.15535	1.0269	0.5688	0.5688	-0.121	BRD-K37385792	conivaptan
CTSL	HCC515	0.0880679	1	0.656363	0.656363	0.677085	-0.1524	0.3034	-0.40315	-0.08515	-0.08515	-0.056	BRD-K53417444	OTS-167
CTSL	A375	0.0880912	0.411551	0.30414	0.30414	0.577807	0.0424	-0.4754	-1.0785	-0.481	-0.481	-0.54	BRD-K91825936	ZK-811752
CTSL	HT29	0.0881113	0.211128	0.139805	0.139805	0.736895	-0.0918	0.37385	0.68385	0.5453	0.5453	-0.0864	BRD-A29854054	lorglumide
CTSL	A375	0.0881241	0.937515	0.810696	0.810696	0.387745	0.0424	0.5852	-0.2063	0.2134	0.2134	0.52355	BRD-K64925568	AMG-232
CTSL	A375	0.0883887	0.59602	0.453974	0.453974	0.654283	0.0424	-0.23565	-0.4085	-0.175	-0.175	0.3183	BRD-K93880783	stavudine
CTSL	A375	0.0884632	0.784549	0.532841	0.532841	0.0329027	0.0424	0.4001	0.1737	0.1737	0.1737	1.1445	BRD-K70301876	escitalopram
CTSL	HA1E	0.0885922	0.94703	0.241649	0.241649	0.0852571	0.0294	-0.2326	-0.0529	0.5833	0.5833	-0.7131	BRD-A95939040	sertaconazole
CTSL	PC3	0.0886946	0.114059	0.0245734	0.0245734	0.230178	-0.0109	-0.40735	-0.8831	-0.5031	-0.5031	-0.4294	BRD-K44100512	KIN001-043
CTSL	PC3	0.0887273	0.0887273	0.0887273	0.0887273	0.0887273	-0.0109	1.5415	1.5415	1.5415	1.5415	1.5415	BRD-K87465484	unc-0646
CTSL	A375	0.0888738	0.221912	0.117886	0.117886	0.955457	0.0424	0.4229	0.3749	0.4709	0.4709	-0.2526	BRD-A09472452	flecainide
CTSL	HT29	0.088917	0.294957	0.0526147	0.0526147	0.25934	-0.0918	0.0814	0.3665	0.6725	0.6725	0.1216	BRD-K40738845	BMS-777607
CTSL	A375	0.0890455	0.579148	0.748946	0.748946	0.104207	0.0424	-0.2641	-0.053	-0.053	-0.053	-0.93955	BRD-K55250441	sulfadoxine
CTSL	PC3	0.0891526	0.556729	0.0546528	0.0546528	0.524983	-0.0109	-0.39085	0.162	-0.7279	-0.7279	-0.4345	BRD-K51967704	BIIB-021
CTSL	PC3	0.0892291	0.695942	0.0237231	0.0237231	0.639237	-0.0109	0.5165	0.0499	0.577	0.577	0.5948	BRD-K73109821	diazoxide
CTSL	PC3	0.0892291	0.104336	0.269844	0.269844	0.0368017	-0.0109	0.47715	1.0247	0.4088	0.4088	1.0694	BRD-K94397152	ribavirin
CTSL	HA1E	0.0892654	0.814428	0.0242499	0.0242499	0.53297	0.0294	-0.28125	0.0929	-0.4201	-0.4201	-0.3001	BRD-K64800655	PHA-793887
CTSL	HA1E	0.0893818	0.781351	0.454543	0.454543	0.330586	0.0294	0.6348	0.6072	0.6072	0.6072	0.1554	BRD-K77947974	fluspirilene
CTSL	A375	0.0895091	0.220986	0.155956	0.155956	0.635651	0.0424	-0.5172	-0.663	-0.6247	-0.6247	0.0969	BRD-K29458283	chlorambucil
CTSL	MCF7	0.0896163	0.322798	0.0194405	0.0194405	0.122048	-0.0333	0.4872	0.5686	1.0318	1.0318	0.9818	BRD-K11129031	gemfibrozil
CTSL	MCF7	0.0896305	0.247469	0.0521246	0.0521246	0.696747	-0.0333	-0.3423	-0.8101	-0.6954	-0.6954	-0.3423	BRD-K15170068	swainsonine
CTSL	MCF7	0.0896856	0.20019	0.0894613	0.0894613	0.960428	-0.0333	0.16875	0.4588	0.185	0.185	0.0728	BRD-K62562723	SR-2640
CTSL	HT29	0.0897156	0.152304	0.627459	0.627459	0.314687	-0.0918	0.304	1.81985	-0.01905	-0.01905	0.1074	BRD-K45275534	betrixaban
CTSL	HA1E	0.0898356	0.41425	0.000567256	0.000567256	0.533587	0.0294	-0.84655	-0.2935	-0.9829	-0.9829	-0.8349	BRD-K70464547	sertraline
CTSL	A375	0.0899638	0.674922	0.111904	0.111904	0.661371	0.0424	0.29125	-0.2776	0.3467	0.3467	0.0654	BRD-A38592941	timonacic
CTSL	A375	0.0901528	0.874641	0.909147	0.909147	0.230368	0.0424	-0.3388	-0.3333	-0.307	-0.307	-1.2091	BRD-K64931368	aminocaproic-acid
CTSL	HT29	0.0901693	0.410719	0.259109	0.259109	0.401784	-0.0918	0.3292	0.2052	0.2052	0.2052	0.4532	BRD-K13756951	bitopertin
CTSL	MCF7	0.0902072	0.180653	0.492675	0.492675	0.626795	-0.0333	0.3317	1.0377	0.17	0.17	0.0008	BRD-K59524082	maribavir
CTSL	PC3	0.0902361	0.0902361	NA	0.0902361	0.0902361	-0.0109	-0.8521	-0.8521	NA	-0.8521	-0.8521	BRD-A13254067	okadaic acid
CTSL	A549	0.090316	0.521297	0.248611	0.248611	0.792356	0.02615	0.45135	0.435	0.435	0.435	0.2957	BRD-K00337317	NU-7441
CTSL	HA1E	0.0904054	0.160308	0.418922	0.418922	0.206839	0.0294	0.3542	1.0249	0.0119	0.0119	0.2988	BRD-A68493689	simeprevir
CTSL	PC3	0.0904991	0.269615	0.571511	0.571511	0.519136	-0.0109	0.3907	0.3935	0.3436	0.3436	0.3773	BRD-K31519811	PF-02545920
CTSL	A549	0.0908587	0.792356	0.512796	0.512796	0.425553	0.02615	0.57285	-0.2144	-0.0517	-0.0517	0.8696	BRD-K51313569	palbociclib
CTSL	HA1E	0.0908636	0.0362164	0.032444	0.032444	0.959573	0.0294	-0.4852	-1.126	-0.7912	-0.7912	-0.4218	BRD-K97428065	netupitant
CTSL	HT29	0.0909359	0.325751	0.361604	0.361604	0.264638	-0.0918	0.34125	0.4559	0.4559	0.4559	0.52655	BRD-K43002771	SR-33805
CTSL	A375	0.0910644	0.659242	0.119353	0.119353	0.392837	0.0424	-0.4528	-0.4155	-0.4777	-0.4777	-0.3435	BRD-K85833139	dehydroepiandrosterone
CTSL	A375	0.0911789	0.977329	0.447868	0.447868	0.793602	0.0424	-0.2677	0.4207	-0.1041	-0.1041	0.0805	BRD-A05523972	telmesteine
CTSL	HA1E	0.0912464	0.0289943	0.0951031	0.0951031	0.202797	0.0294	-0.34735	-1.1869	-0.6379	-0.6379	-0.3372	BRD-A26384407	chlorthalidone
CTSL	HT29	0.0913584	0.323809	0.260434	0.260434	0.729084	-0.0918	0.49825	0.5164	0.6052	0.6052	0	BRD-K28307902	flutamide
CTSL	HA1E	0.0914769	0.72346	0.126285	0.126285	0.416222	0.0294	-0.23295	-0.39	-0.41	-0.41	-0.0759	BRD-K26712974	VX-765
CTSL	HA1E	0.0915923	0.282683	0.353251	0.353251	0.359231	0.0294	-0.362	-0.7945	-0.5393	-0.5393	-0.1847	BRD-K32744045	disulfiram
CTSL	A375	0.0915996	0.40048	0.69043	0.69043	0.578477	0.0424	-0.37135	0.9884	0.0549	0.0549	-0.2977	BRD-K15426076	iguratimod
CTSL	A375	0.091638	0.765037	0.354493	0.354493	0.0892875	0.0424	0.47595	0.4746	0.4746	0.4746	0.6919	BRD-K68488863	ENMD-2076
CTSL	A375	0.091638	0.0860146	0.00804782	0.00804782	0.772525	0.0424	-0.346	-0.7062	-0.7062	-0.7062	-0.0031	BRD-K71281111	SNX-2112
CTSL	HA1E	0.0919321	0.486226	0.27139	0.27139	0.656761	0.0294	0.4634	0.403	0.35695	0.35695	0.8598	BRD-K05395900	nicotine
CTSL	MCF7	0.0919516	0.840605	0.359873	0.359873	0.0653421	-0.0333	-0.33195	0.12025	-0.34145	-0.34145	-0.7659	BRD-K16730910	regorafenib
CTSL	HA1E	0.092055	0.678243	0.0948223	0.0948223	0.641889	0.0294	0.6553	-0.0971	0.6716	0.6716	0.6619	BRD-A38218502	metenkephalin
CTSL	A549	0.0920879	0.00937777	0.410276	0.410276	0.846854	0.02615	0.2689	0.7562	0.2689	0.2689	0.04875	BRD-K53561341	aurora-a-inhibitor-i
CTSL	PC3	0.0921453	0.0945267	0.0114722	0.0114722	0.279595	-0.0109	-0.3156	-0.8914	-0.63805	-0.63805	0.46135	BRD-K87142802	veliparib
CTSL	A375	0.0923686	0.391211	0.732517	0.732517	0.365233	0.0424	-0.47575	0.4355	0.0057	0.0057	-0.8959	BRD-K15592317	CP-466722
CTSL	MCF7	0.0923892	0.035087	0.198702	0.198702	0.773863	-0.0333	-0.5797	-1.3857	-0.8719	-0.8719	-0.1174	BRD-K73395020	ARP-101
CTSL	A375	0.0924844	0.579148	0.107885	0.107885	0.811409	0.0424	-0.2189	-0.0418	-0.1557	-0.1557	-0.2242	BRD-A62025033	temsirolimus
CTSL	MCF7	0.0925765	0.0822025	0.205463	0.205463	0.346921	-0.0333	-0.2813	-0.6636	-0.4293	-0.4293	-0.21325	BRD-K40738845	BMS-777607
CTSL	HT29	0.092599	0.266072	0.0509785	0.0509785	0.471002	-0.0918	0.4753	0.9422	0.9422	0.9422	0.4041	BRD-K75911534	SU-014813
CTSL	HT29	0.0926769	0.886459	0.426304	0.426304	0.340558	-0.0918	-0.30295	-0.2842	-0.2842	-0.2842	-0.2652	BRD-K23672206	BCI-540
CTSL	HT29	0.092716	0.997241	0.784955	0.784955	0.034504	-0.0918	-0.67085	0.4134	-0.0974	-0.0974	-1.0342	BRD-K92968657	tirapazamine
CTSL	PC3	0.0927665	0.156983	0.0799337	0.0799337	0.449276	-0.0109	-0.4313	-1.1412	-0.5448	-0.5448	-0.3288	BRD-K22096725	ALW-II-49-7
CTSL	HCC515	0.093041	0.0268472	0.287418	0.287418	0.332108	-0.1524	0.09105	0.8978	-0.0754	-0.0754	0.0556	BRD-K17588104	JQ1-(-)
CTSL	HA1E	0.0931812	0.589971	0.224965	0.224965	0.915735	0.0294	-0.3163	-0.1388	-0.1388	-0.1388	0.1637	BRD-K58211978	roxithromycin
CTSL	A375	0.0932083	0.0702356	0.106134	0.106134	0.0444523	0.0424	-0.4211	-0.7349	-0.39945	-0.39945	-0.8991	BRD-K02404261	caffeine
CTSL	HEPG2	0.0934203	0.124792	0.910506	0.910506	0.878218	-0.17825	0.25225	0.8313	-0.3151	-0.3151	-0.2646	BRD-A18328003	GDC-0980
CTSL	HT29	0.0934204	0.689375	0.116484	0.116484	0.870873	-0.0918	0.33145	0.3074	0.3865	0.3865	0.1166	BRD-K22097830	OCO-1112
CTSL	PC3	0.0934397	0.678294	0.624297	0.624297	0.152349	-0.0109	0.2418	-0.7906	-0.0711	-0.0711	1.4836	BRD-K68407802	KIN001-055
CTSL	HT29	0.093534	0.0622339	0.0710344	0.0710344	0.533269	-0.0918	0.1219	0.5563	0.5179	0.5179	-0.4887	BRD-A24514565	warfarin
CTSL	PC3	0.0936384	0.335789	0.0793401	0.0793401	0.0185814	-0.0109	-0.6115	-0.9182	-0.7456	-0.7456	1.2362	BRD-K49807096	benazepril
CTSL	MCF7	0.0936755	0.468265	0.991077	0.991077	0.0892072	-0.0333	-0.5804	0.5395	0.1686	0.1686	-0.5723	BRD-K22024824	RG-4733
CTSL	MCF7	0.0937371	0.579029	0.628395	0.628395	0.351393	-0.0333	0.3631	-0.3319	0.3431	0.3431	0.705	BRD-K43578482	defactinib
CTSL	HT29	0.0937743	0.67632	0.267988	0.267988	0.617423	-0.0918	0.4872	0.4785	0.4634	0.4634	0.7438	BRD-K14619660	altrenogest
CTSL	A375	0.093883	0.157646	0.306272	0.306272	0.105066	0.0424	0.38765	1.4048	0.1301	0.1301	0.5432	BRD-K26341917	L-ergothioneine
CTSL	PC3	0.0938838	0.63442	0.0770241	0.0770241	0.741813	-0.0109	0.1528	-0.5475	0.51	0.51	0.06795	BRD-K53414658	tivozanib
CTSL	HT29	0.0939319	0.201715	0.144122	0.144122	0.154328	-0.0918	-0.3381	-0.4847	-0.4847	-0.4847	-0.8925	BRD-A07704283	isofloxythepin
CTSL	HT29	0.0940502	0.535869	0.0416105	0.0416105	0.494417	-0.0918	0.5211	0.697	0.697	0.697	0.9977	BRD-K11071038	ICI-162846
CTSL	A375	0.0943922	0.893206	0.202498	0.202498	0.893594	0.0424	0.6388	-0.3621	0.6724	0.6724	-0.1478	BRD-K08248804	LCL-161
CTSL	A375	0.0944315	0.453476	0.762258	0.762258	0.140275	0.0424	0.3589	0.0987	0.1815	0.1815	0.9381	BRD-K66175015	afatinib
CTSL	A375	0.0944315	0.992963	0.203801	0.203801	0.772525	0.0424	0.4478	0.0143	0.7361	0.7361	0.1469	BRD-K71103788	duloxetine
CTSL	HA1E	0.094555	0.112488	0.0390987	0.0390987	0.524568	0.0294	0.3924	0.6918	0.6918	0.6918	0.28	BRD-K46018455	bezafibrate
CTSL	HA1E	0.0945758	0.558124	0.393121	0.393121	0.307644	0.0294	-0.2784	0.437	-0.2195	-0.2195	-0.3187	BRD-K92093830	doxorubicin
CTSL	PC3	0.0946895	0.551383	0.631564	0.631564	0.103159	-0.0109	0.56485	0.31975	0.1723	0.1723	0.9695	BRD-A69636825	diltiazem
CTSL	HT29	0.0947231	0.386431	0.614756	0.614756	0.110412	-0.0918	0.32005	0.443	0.1522	0.1522	0.3402	BRD-K28470988	L-690330
CTSL	HT29	0.0947628	0.0623033	0.00790625	0.00790625	0.323083	-0.0918	-0.5626	-0.9551	-0.7861	-0.7861	-0.7327	BRD-K02292852	cefoperazone
CTSL	HA1E	0.0948317	0.656049	0.0330929	0.0330929	0.467909	0.0294	0.46385	0.1672	0.7142	0.7142	-0.3698	BRD-K04691817	AGI-6780
CTSL	MCF7	0.0949035	0.0281091	0.0531293	0.0531293	0.959709	-0.0333	0.3959	1.0006	0.8537	0.8537	0.3038	BRD-K87782578	AVL-292
CTSL	MCF7	0.0949271	0.96386	0.0148857	0.0148857	0.038757	-0.0333	-0.543	-0.05825	-0.6536	-0.6536	-0.9487	BRD-K68346641	amsacrine
CTSL	HT29	0.0950013	0.411281	0.813115	0.813115	0.117648	-0.0918	0.40305	0.5034	-0.4813	-0.4813	0.6547	BRD-K36862742	hydroflumethiazide
CTSL	MCF7	0.0950488	0.0228971	0.0464146	0.0464146	0.139254	-0.0333	0.3681	1.312	0.7543	0.7543	0.6822	BRD-K52020312	metronidazole
CTSL	HT29	0.0951606	0.419202	0.0566019	0.0566019	0.780129	-0.0918	0.3067	0.8997	0.5733	0.5733	0.2325	BRD-K83405785	pimavanserin
CTSL	HEPG2	0.0951938	0.688756	0.759294	0.759294	0.716673	-0.17825	0.0356	0.2205	-0.0073	-0.0073	-0.2717	BRD-K19540840	saracatinib
CTSL	PC3	0.0952308	0.097216	0.13613	0.13613	0.664446	-0.0109	-0.5022	-1.1654	-0.90405	-0.90405	0.5234	BRD-A07395371	esmolol
CTSL	PC3	0.0952322	0.339856	0.872356	0.872356	0.41375	-0.0109	0.6065	-0.85325	0.2878	0.2878	0.54585	BRD-A87435144	AZD-7545
CTSL	A375	0.0953381	0.37835	0.59071	0.59071	0.929724	0.0424	-0.211	-0.6694	0.0563	0.0563	-0.1222	BRD-K94288301	letermovir
CTSL	A375	0.0953533	0.0953533	0.0953533	0.0953533	0.0953533	0.0424	0.8619	0.8619	0.8619	0.8619	0.8619	BRD-K29343434	bms-906024
CTSL	MCF7	0.0953764	0.0602286	0.0985439	0.0985439	0.731066	-0.0333	0.4154	1.0153	0.458	0.458	-0.2855	BRD-K77641333	naphazoline
CTSL	HT29	0.0955197	0.210758	0.189832	0.189832	0.890362	-0.0918	0.30675	0.5536	0.4552	0.4552	-0.355	BRD-A90451247	KU-60019
CTSL	HA1E	0.095586	0.379702	0.393751	0.393751	0.130958	0.0294	-0.3	-0.3027	-0.3027	-0.3027	-0.9877	BRD-K22024824	RG-4733
CTSL	MCF7	0.0956318	0.0560443	0.0895594	0.0895594	0.803372	-0.0333	0.5978	1.2048	0.637	0.637	-0.1314	BRD-K79759585	sildenafil
CTSL	HT29	0.0957196	0.543054	0.302099	0.302099	0.924817	-0.0918	-0.57235	-1.1224	-0.3696	-0.3696	-0.6885	BRD-K09602097	forskolin
CTSL	PC3	0.0957659	0.177875	0.0323078	0.0323078	0.532176	-0.0109	0.4049	0.4905	0.6356	0.6356	-0.4626	BRD-K12932420	YM-976
CTSL	HA1E	0.0957853	0.247881	0.199811	0.199811	0.318025	0.0294	-0.40735	-0.6951	-0.4762	-0.4762	-0.3385	BRD-K15108141	gemcitabine
CTSL	HT29	0.0957997	0.809377	0.094983	0.176773	0.850688	-0.0918	0.27515	-0.1909	0.4249	0.1987	-0.1764	BRD-K40227168	vinburnine
[truncated: 7,725 more rows]
