# Supplementary material for: Transcriptional Inhibition of Host Viral Entry Proteins as a Therapeutic Strategy for SARS-CoV-2
Source: Preprints.org preprint supplement (doi:10.20944/preprints202003.0360.v1), 2020-03-24
Supplement: Supplementary file 8 [file Supplementary_Table_7_ConnectivityMap_PPI_interactingProteins.xlsx]

## Sheet: Description
Query label	Description of CMAP query
All genes	Top 150 genes from SARS-CoV-2 map (ranked by log fold change)
L1000 & imputed	Genes from SARS-CoV-2 map included in L1000 landmark genes + well-imputed genes
L1000 only	Genes from SARS-CoV-2 map included in L1000 landmark genes
Intersection	Compounds returned from all three queries with Connectivity Score < -90

## Sheet: All genes
Rank	Score	Type	ID	Name	Description
8553	-99.93	cp	BRD-K08554278	bisbenzimide	DNA binding agent
8541	-99.66	cp	BRD-A02481876	importazole	Importin-beta transport receptor inhibitor
8536	-99.51	cp	BRD-K30677119	PP-30	RAF inhibitor
8527	-99.4	cp	BRD-K54330070	SB-202190	p38 MAPK inhibitor
8523	-99.33	cp	BRD-A36630025	SN-38	Topoisomerase inhibitor
8521	-99.3	cp	BRD-A30437061	camptothecin	Topoisomerase inhibitor
8513	-99.12	cp	BRD-K51018020	VAMA-37	DNA dependent protein kinase inhibitor
8514	-99.12	cp	BRD-K78373679	RO-3306	CDK inhibitor
8512	-99.08	cp	BRD-K59456551	methotrexate	Dihydrofolate reductase inhibitor
8505	-98.98	cp	BRD-K77908580	entinostat	HDAC inhibitor
8503	-98.91	cp	BRD-K60219430	serdemetan	MDM inhibitor
8499	-98.87	cp	BRD-K11663430	pyroxamide	HDAC inhibitor
8491	-98.77	cp	BRD-K58299615	RO-90-7501	Beta amyloid inhibitor
8492	-98.77	cp	BRD-K29313308	HDAC3-selective	HDAC inhibitor
8493	-98.77	cp	BRD-K52522949	NCH-51	HDAC inhibitor
8488	-98.73	cp	BRD-K67439147	SIB-1893	Glutamate receptor antagonist
8487	-98.7	cp	BRD-K27710560	splitomycin	SIRT inhibitor
8484	-98.66	cp	BRD-K13646352	midostaurin	FLT3 inhibitor
8478	-98.52	cp	BRD-K04466929	Merck60	HDAC inhibitor
8476	-98.48	cp	BRD-A59985574	topotecan	Topoisomerase inhibitor
8474	-98.45	cp	BRD-K31542390	mycophenolic-acid	Dehydrogenase inhibitor
8472	-98.41	cp	BRD-K16485616	mocetinostat	HDAC inhibitor
8457	-98.24	cp	BRD-K27305650	LY-294002	MTOR inhibitor
8459	-98.24	cp	BRD-K87909389	alvocidib	CDK inhibitor
8455	-98.17	cp	BRD-K04548931	pidorubicine	Topoisomerase inhibitor
8451	-98.13	cp	BRD-K64341947	CFM-1571	Guanylate cyclase activator
8449	-98.1	cp	BRD-K06543683	bisindolylmaleimide-ix	CDK inhibitor
8447	-98.06	cp	BRD-K43389675	daunorubicin	RNA synthesis inhibitor
8442	-97.96	cp	BRD-A11702965	chromomycin-a3	DNA binding agent
8443	-97.96	cp	BRD-K08547377	irinotecan	Topoisomerase inhibitor
8438	-97.89	cp	BRD-K68065987	MK-2206	AKT inhibitor
8432	-97.82	cp	BRD-A80960055	celastrol	Anti-inflammatory
8433	-97.82	cp	BRD-A62025033	temsirolimus	MTOR inhibitor
8424	-97.71	cp	BRD-A73909368	dactinomycin	RNA polymerase inhibitor
8422	-97.68	cp	BRD-K02526760	QS-11	ARFGAP inhibitor
8421	-97.67	cp	BRD-K11927976	ER-27319	Mediator release inhibitor
8420	-97.64	cp	BRD-K57080016	selumetinib	MEK inhibitor
8418	-97.6	cp	BRD-K95785537	PP-2	SRC inhibitor
8414	-97.53	cp	BRD-K83794624	pirarubicin	Topoisomerase inhibitor
8413	-97.52	cp	BRD-K67868012	PI-103	MTOR inhibitor
8408	-97.43	cp	BRD-A13122391	triptolide	RNA polymerase inhibitor
8405	-97.36	cp	BRD-K17743125	belinostat	HDAC inhibitor
8403	-97.35	cp	BRD-A48237631	mitomycin-c	DNA alkylating agent
8395	-97.22	cp	BRD-K22947005	dexbrompheniramine	Histamine receptor antagonist
8396	-97.22	cp	BRD-K99818283	PIK-90	PI3K inhibitor
8394	-97.19	cp	BRD-A82096673	KU-C103428N	CDC inhibitor
8389	-97.08	cp	BRD-K92093830	doxorubicin	Topoisomerase inhibitor
8384	-97	cp	BRD-K97365803	PI-828	PI3K inhibitor
8379	-96.9	cp	BRD-M16762496	PIK-75	DNA protein kinase inhibitor
8380	-96.9	cp	BRD-K94832621	Y-134	Estrogen receptor antagonist
8374	-96.86	cp	BRD-K37798499	etoposide	Topoisomerase inhibitor
8373	-96.84	cp	BRD-K56957086	dacinostat	HDAC inhibitor
8370	-96.83	cp	BRD-K99545815	PF-562271	Focal adhesion kinase inhibitor
8365	-96.76	cp	BRD-K19220233	JNK-9L	JNK inhibitor
8366	-96.76	cp	BRD-K92428153	mycophenolate-mofetil	Dehydrogenase inhibitor
8361	-96.72	cp	BRD-K13566078	BMS-345541	IKK inhibitor
8358	-96.56	cp	BRD-A35588707	teniposide	Topoisomerase inhibitor
8354	-96.53	cp	BRD-K79090631	CGP-60474	CDK inhibitor
8353	-96.49	cp	BRD-A69512159	carbidopa	Aromatic L-amino acid decarboxylase inhibitor
8351	-96.48	cp	BRD-K12906962	dichlorobenzamil	Sodium/calcium exchange inhibitor
8349	-96.45	cp	BRD-U51951544	ZG-10	JNK inhibitor
8348	-96.44	cp	BRD-K30097969	pitavastatin	HMGCR inhibitor
8342	-96.34	cp	BRD-K74761218	WT-171	HDAC inhibitor
8343	-96.34	cp	BRD-K49294207	BIBU-1361	EGFR inhibitor
8341	-96.32	cp	BRD-K69840642	ISOX	HDAC inhibitor
8334	-96.2	cp	BRD-A07824748	flavanone	11-beta-HSD1 inhibitor
8333	-96.19	cp	BRD-K63068307	ZSTK-474	PI3K inhibitor
8328	-96.15	cp	BRD-K68873215	phosphodiesterase-V-inhibitor-II	Phosphodiesterase inhibitor
8327	-96.14	cp	BRD-K11636097	JNJ-7706621	CDK inhibitor
8325	-96.12	cp	BRD-K19894101	MST-312	Telomerase inhibitor
8322	-96.09	cp	BRD-K04887706	AKT-inhibitor-1-2	AKT inhibitor
8323	-96.09	cp	BRD-K69932463	AZD-8055	MTOR inhibitor
8318	-96.02	cp	BRD-K98490050	amsacrine	Topoisomerase inhibitor
8316	-95.98	cp	BRD-A61856038	tremulacin	Lipoxygenase inhibitor
8317	-95.98	cp	BRD-K34581968	BMS-536924	IGF-1 inhibitor
8313	-95.95	cp	BRD-K64800655	PHA-793887	CDK inhibitor
8305	-95.81	cp	BRD-K69650333	idarubicin	Topoisomerase inhibitor
8303	-95.71	cp	BRD-A72988804	tiaprofenic-acid	Cyclooxygenase inhibitor
8297	-95.63	cp	BRD-K99749624	linifanib	PDGFR receptor inhibitor
8292	-95.56	cp	BRD-K92870997	pterostilbene	Cyclooxygenase inhibitor
8290	-95.5	cp	BRD-K41337261	ZM-306416	ABL inhibitor
8288	-95.46	cp	BRD-K38615104	A-443644	AKT inhibitor
8285	-95.42	cp	BRD-U25771771	WZ-4-145	EGFR inhibitor
8281	-95.37	cp	BRD-K74733595	APHA-compound-8	HDAC inhibitor
8280	-95.34	cp	BRD-K00627859	tubastatin-a	HDAC inhibitor
8279	-95.3	cp	BRD-K10042277	desmethylclozapine	Acetylcholine receptor agonist
8278	-95.28	cp	BRD-K94294671	OSI-027	MTOR inhibitor
8276	-95.27	cp	BRD-K22503835	scriptaid	HDAC inhibitor
8277	-95.27	cp	BRD-K15592317	CP466722	ATM kinase inhibitor
8272	-95.21	cp	BRD-K50836978	purvalanol-a	CDK inhibitor
8267	-95.12	cp	BRD-A11678676	wortmannin	PI3K inhibitor
8260	-95.03	cp	BRD-A35989968	megestrol	Progesterone receptor agonist
8255	-94.86	cp	BRD-K85606544	neratinib	EGFR inhibitor
8243	-94.71	cp	BRD-K68202742	trichostatin-a	HDAC inhibitor
8244	-94.71	cp	BRD-A15079084	phorbol-12-myristate-13-acetate	PKC activator
8242	-94.7	cp	BRD-A23072235	pheniramine	Histamine receptor antagonist
8238	-94.59	cp	BRD-K05434375	HA-1004	Calcium channel blocker
8237	-94.57	cp	BRD-K13390322	AT-7519	CDK inhibitor
8236	-94.56	cp	BRD-K70914287	BIBX-1382	EGFR inhibitor
8234	-94.51	cp	BRD-K37206356	rhamnetin	HDAC inhibitor
8233	-94.5	cp	BRD-K81418486	vorinostat	HDAC inhibitor
8230	-94.47	cp	BRD-K52911425	GDC-0941	PI3K inhibitor
8227	-94.44	cp	BRD-K15108141	gemcitabine	Ribonucleotide reductase inhibitor
8224	-94.43	cp	BRD-K13810148	givinostat	HDAC inhibitor
8226	-94.43	cp	BRD-K12184916	dactolisib	MTOR inhibitor
8223	-94.39	cp	BRD-A09539288	homatropine	Acetylcholine receptor antagonist
8220	-94.32	cp	BRD-K47598052	PP-1	SRC inhibitor
8216	-94.25	cp	BRD-K92991072	PAC-1	Caspase activator
8211	-94.19	cp	BRD-K59058766	chlorprothixene	Dopamine receptor antagonist
8210	-94.16	cp	BRD-A89337244	PD-102807	Acetylcholine receptor antagonist
8206	-94.08	cp	BRD-K52313696	tacedinaline	HDAC inhibitor
8201	-94.03	cp	BRD-K32330832	VER-155008	HSP inhibitor
8199	-94	cp	BRD-K35531059	molsidomine	Guanylyl cyclase activator
8198	-93.92	cp	BRD-K06980535	promazine	Dopamine receptor antagonist
8197	-93.8	cp	BRD-K12867552	THM-I-94	HDAC inhibitor
8191	-93.67	cp	BRD-A45889380	mepacrine	Cytokine production inhibitor
8184	-93.42	cp	BRD-A18497530	5-iodotubercidin	Adenosine kinase inhibitor
8181	-93.33	cp	BRD-K49049886	CGS-15943	Adenosine receptor antagonist
8182	-93.33	cp	BRD-K53414658	tivozanib	VEGFR inhibitor
8179	-93.28	cp	BRD-K07762753	aminopurvalanol-a	Tyrosine kinase inhibitor
8180	-93.28	cp	BRD-A02333338	cyclopamine	Smoothened receptor antagonist
8178	-93.27	cp	BRD-K19540840	saracatinib	SRC inhibitor
8174	-93.24	cp	BRD-K14920963	erythrosine	Coloring agent
8176	-93.24	cp	BRD-K11558771	droxinostat	HDAC inhibitor
8172	-93.22	cp	BRD-A19248578	latrunculin-b	Actin polymerization inhibitor
8168	-93.16	cp	BRD-A88254928	salbutamol	Adrenergic receptor agonist
8166	-93.11	cp	BRD-K78431006	crizotinib	ALK inhibitor
8157	-92.85	cp	BRD-K58772419	AZD-6482	PI3K inhibitor
8159	-92.85	cp	BRD-K67566344	KU-0063794	MTOR inhibitor
8156	-92.82	cp	BRD-K04210847	tamoxifen	Estrogen receptor antagonist
8155	-92.79	cp	BRD-K42748308	XE-991	Potassium channel blocker
8154	-92.77	cp	BRD-K20285085	fostamatinib	SYK inhibitor
8152	-92.75	cp	BRD-K63784565	BRD-K63784565	Topoisomerase inhibitor
8144	-92.64	cp	BRD-K36198571	WAY-170523	Metalloproteinase inhibitor
8145	-92.64	cp	BRD-M64432851	sunitinib	FLT3 inhibitor
8138	-92.53	cp	BRD-K09132007	D-4476	TGF beta receptor inhibitor
8137	-92.52	cp	BRD-K78278890	NM-PP1	Mutant kinase inhibitor
8133	-92.48	cp	BRD-K02123250	JNJ-38877605	Tyrosine kinase inhibitor
8131	-92.46	cp	BRD-K09499853	KU-0060648	DNA dependent protein kinase inhibitor
8127	-92.38	cp	BRD-K85015012	NNC-05-2090	GAT inhibitor
8122	-92.27	cp	BRD-K81847782	scandenin	Plant compound with antimicrobial activity
8120	-92.23	cp	BRD-K91263825	nortriptyline	Tricyclic antidepressant
8117	-92.1	cp	BRD-K03642198	AY-9944	Hedgehog pathway modulator
8111	-92.03	cp	BRD-K48300629	zonisamide	Sodium channel blocker
8100	-91.81	cp	BRD-K49669041	BX-912	Pyruvate dehydrogenase kinase inhibitor
8097	-91.7	cp	BRD-A84481105	thioridazine	Dopamine receptor antagonist
8094	-91.68	cp	BRD-K09537769	NU-7026	DNA dependent protein kinase inhibitor
8091	-91.61	cp	BRD-K82036761	sertraline	Serotonin receptor antagonist
8090	-91.6	cp	BRD-K12219985	glipizide	Sulfonylurea
8086	-91.46	cp	BRD-K08890269	CO-102862	Sodium channel blocker
8084	-91.43	cp	BRD-K70490179	rimcazole	Sigma receptor antagonist
8081	-91.39	cp	BRD-K17953061	staurosporine	PKC inhibitor
8076	-91.15	cp	BRD-K50168500	canertinib	EGFR inhibitor
8067	-90.96	cp	BRD-K65503129	HSP90-inhibitor	HSP inhibitor
8065	-90.91	cp	BRD-K00603606	ticlopidine	Purinergic receptor antagonist
8059	-90.76	cp	BRD-K77286328	reversine	Aurora kinase inhibitor
8057	-90.7	cp	BRD-K07403598	CAY-10470	NFkB pathway inhibitor
8055	-90.67	cp	BRD-K06234293	LY-364947	TGF beta receptor inhibitor
8054	-90.65	cp	BRD-K25504083	cytochalasin-d	Actin polymerization inhibitor
8051	-90.6	cp	BRD-K96809896	SKF-86002	p38 MAPK inhibitor
8049	-90.57	cp	BRD-K77947974	fluspirilene	Dopamine receptor antagonist
8046	-90.51	cp	BRD-M86331534	pyrvinium-pamoate	AKT inhibitor
8047	-90.51	cp	BRD-A49225603	alimemazine	Histamine receptor agonist
8043	-90.45	cp	BRD-K04546108	JAK3-inhibitor-VI	JAK inhibitor
8041	-90.42	cp	BRD-K70487031	flupentixol	Dopamine receptor antagonist
8038	-90.36	cp	BRD-K07691486	roscovitine	CDK inhibitor
8034	-90.3	cp	BRD-A45498368	WYE-125132	MTOR inhibitor
8027	-90.23	cp	BRD-K03600606	catechin	Beta secretase inhibitor
8025	-90.17	cp	BRD-K64890080	BI-2536	PLK inhibitor
8016	-89.98	cp	BRD-K83972459	JWE-035	Aurora kinase inhibitor
8015	-89.94	cp	BRD-K42573370	avrainvillamide-analog-2	nucleophosmin inhibitor
8012	-89.92	cp	BRD-K13514097	everolimus	MTOR inhibitor
8010	-89.91	cp	BRD-K06750613	GSK-1059615	PI3K inhibitor
8011	-89.91	cp	BRD-K91904471	SD-169	p38 MAPK inhibitor
8006	-89.82	cp	BRD-K15519488	CS-110266	Dopamine receptor agonist
8004	-89.8	cp	BRD-K75295174	alisertib	Aurora kinase inhibitor
8003	-89.78	cp	BRD-K27721098	clopidogrel	Purinergic receptor antagonist
7999	-89.77	cp	BRD-A39646320	HC-toxin	HDAC inhibitor
7995	-89.74	cp	BRD-K56429665	calcipotriol	Vitamin D receptor agonist
7988	-89.64	cp	BRD-K06426971	ryuvidine	Histone lysine methyltransferase inhibitor
7986	-89.59	cp	BRD-K01649396	indatraline	Norepinephrine transporter inhibitor
7985	-89.58	cp	BRD-K02227374	milnacipran	Serotonin reuptake inhibitor
7974	-89.2	cp	BRD-K68756823	FR-180204	-666
7965	-88.96	cp	BRD-A82371568	clofarabine	Ribonucleoside reductase inhibitor
7964	-88.94	cp	BRD-A11813248	AM-92016	Potassium channel blocker
7962	-88.92	cp	BRD-A16311756	profenamine	Butyrylcholinesterase inhibitor
7957	-88.73	cp	BRD-K83837640	JNJ-26854165	HDAC inhibitor
7954	-88.71	cp	BRD-K28907958	CD-437	Retinoid receptor agonist
7946	-88.65	cp	BRD-K77987382	mebendazole	Tubulin inhibitor
7944	-88.6	cp	BRD-K15916496	clotrimazole	Cytochrome P450 inhibitor
7941	-88.5	cp	BRD-K93201660	ML-7	Myosin light chain kinase inhibitor
7940	-88.47	cp	BRD-K64052750	gefitinib	EGFR inhibitor
7937	-88.39	cp	BRD-K93331255	lypressin	Vasopressin receptor agonist
7934	-88.32	cp	BRD-A69960130	bromocriptine	Dopamine receptor agonist
7933	-88.29	cp	BRD-K17743697	KB-R7943	Sodium/calcium exchange inhibitor
7930	-88.14	cp	BRD-K47983010	BX-795	IKK inhibitor
7928	-88.08	cp	BRD-A65076780	dihydroergocristine	Adrenergic receptor antagonist
7921	-88	cp	BRD-K17140735	SCH-79797	Proteasome inhibitor
7914	-87.84	cp	BRD-A19633847	perhexiline	Carnitine palmitoyltransferase inhibitor
7907	-87.72	cp	BRD-K48115423	2-(4-methoxybenzylthio)-6-methylpyrimidin-4-ol	Matrix metalloprotease inhibitor
7905	-87.68	cp	BRD-K68488863	ENMD-2076	FLT3 inhibitor
7897	-87.46	cp	BRD-K37447567	hydrocotarnine	Opioid receptor antagonist
7896	-87.44	cp	BRD-K22878149	SB-205607	Delta 1 opioid receptor agonist
7888	-87.24	cp	BRD-K28296557	AKT-inhibitor-IV	AKT inhibitor
7889	-87.24	cp	BRD-K10705233	GW-405833	Cannabinoid receptor agonist
7886	-87.22	cp	BRD-M41783010	acamprosate	Glutamate receptor antagonist
7884	-87.2	cp	BRD-K76872913	benzanthrone	Aromatic hydrocarbon derivative
7881	-87.17	cp	BRD-U44700465	HG-5-88-01	Protein kinase inhibitor
7883	-87.17	cp	BRD-A29901043	KIN001-127	ITK inhibitor
7873	-86.95	cp	BRD-K49810818	sorafenib	FLT3 inhibitor
7871	-86.85	cp	BRD-K11911061	GR-127935	Serotonin receptor antagonist
7860	-86.43	cp	BRD-K95435023	PHA-665752	c-Met inhibitor
7857	-86.38	cp	BRD-K21565985	xylazine	Adrenergic receptor agonist
7853	-86.3	cp	BRD-A68888262	azelastine	Histamine receptor antagonist
7851	-86.26	cp	BRD-K09485525	GANT-61	GLI antagonist
7848	-86.18	cp	BRD-K73196317	urapidil	Adrenergic receptor antagonist
7846	-86.17	cp	BRD-K62221994	T-98475	Gonadotropin releasing factor hormone receptor antagonist
7842	-86.13	cp	BRD-K88429204	pyrimethamine	Dihydrofolate reductase inhibitor
7836	-86.02	cp	BRD-K78692225	leflunomide	Dihydroorotate dehydrogenase inhibitor
7832	-85.94	cp	BRD-K36740062	GSK-1070916	Aurora kinase inhibitor
7827	-85.83	cp	BRD-K82795137	loratadine	Histamine receptor antagonist
7821	-85.74	cp	BRD-K18787491	U-0126	MEK inhibitor
7819	-85.66	cp	BRD-K72676686	fluvoxamine	Selective serotonin reuptake inhibitor (SSRI)
7814	-85.57	cp	BRD-U82589721	HG-5-113-01	Protein kinase inhibitor
7811	-85.47	cp	BRD-K06593056	LE-135	Retinoid receptor agonist
7807	-85.35	cp	BRD-K05181463	L-741626	Dopamine receptor antagonist
7806	-85.31	cp	BRD-A81772229	simvastatin	HMGCR inhibitor
7804	-85.28	cp	BRD-K67352070	TC-2559	Acetylcholine receptor agonist
7801	-85.26	cp	BRD-A70731303	avrainvillamide-analog-5	nucleophosmin inhibitor
7803	-85.26	cp	BRD-K08219523	5-nonyloxytryptamine	Serotonin receptor agonist
7799	-85.24	cp	BRD-A06352418	terfenadine	Histamine receptor antagonist
7798	-85.19	cp	BRD-K92428232	GSK-461364	PLK inhibitor
7792	-85.11	cp	BRD-K12102668	nialamide	Monoamine oxidase inhibitor
7790	-85.09	cp	BRD-K56334280	amonafide	Topoisomerase inhibitor
7785	-85.03	cp	BRD-K93034159	cladribine	Adenosine deaminase inhibitor
7784	-85.01	cp	BRD-K10995081	perphenazine	Dopamine receptor antagonist
7781	-84.94	cp	BRD-K21680192	mitoxantrone	Topoisomerase inhibitor
7777	-84.89	cp	BRD-K82823804	SA-792987	PKC inhibitor
7769	-84.67	cp	BRD-A76279427	myriocin	Serine palmitoyltransferase inhibitor
7767	-84.65	cp	BRD-A48570745	ivermectin	GABA receptor agonist
7760	-84.46	cp	BRD-K22828899	TUL-XXI039	Serine/threonine kinase inhibitor
7759	-84.43	cp	BRD-A31159102	fluoxetine	Selective serotonin reuptake inhibitor (SSRI)
7748	-84.3	cp	BRD-K94144010	cotinine	Nicotine metabolite
7746	-84.25	cp	BRD-A10977446	carvedilol	Adrenergic receptor antagonist
7742	-84.16	cp	BRD-K54316499	tolterodine	Acetylcholine receptor antagonist
7738	-84.03	cp	BRD-U37049823	HG-6-64-01	RAF inhibitor
7731	-83.95	cp	BRD-A94413429	NTNCB	Neuropeptide receptor antagonist
7730	-83.91	cp	BRD-K10176267	L-701252	Glutamate receptor antagonist
7707	-83.44	cp	BRD-K12502280	TG-101348	FLT3 inhibitor
7703	-83.4	cp	BRD-K89997465	chlorpromazine	Dopamine receptor antagonist
7699	-83.31	cp	BRD-K48735772	PD-158780	EGFR inhibitor
7686	-82.83	cp	BRD-K85985071	ellipticine	Topoisomerase inhibitor
7684	-82.82	cp	BRD-K03440695	boldine	Acetylcholine receptor antagonist
7675	-82.45	cp	BRD-K37991163	paroxetine	Selective serotonin reuptake inhibitor (SSRI)
7669	-82.23	cp	BRD-K44432556	VU-0418946-1	HIF modulator
7668	-82.21	cp	BRD-A60245366	AS-601245	JNK inhibitor
7664	-82.14	cp	BRD-K29950728	clomifene	Estrogen receptor antagonist
7658	-82.04	cp	BRD-K63675182	triflupromazine	Dopamine receptor antagonist
7657	-81.94	cp	BRD-K89839824	raltitrexed	Thymidylate synthase inhibitor
7649	-81.86	cp	BRD-K49945136	GR-113808	Serotonin receptor antagonist
7645	-81.79	cp	BRD-K18059238	gamma-linolenic-acid	Cyclooxygenase inhibitor
7638	-81.68	cp	BRD-K76907295	VU-0418947-2	HIF modulator
7635	-81.61	cp	BRD-K51967704	BIIB021	HSP inhibitor
7636	-81.61	cp	BRD-K11373525	ZD-7155	Angiotensin receptor antagonist
7631	-81.5	cp	BRD-K62792802	LY-83583	Guanylyl cyclase inhibitor
7625	-81.3	cp	BRD-A82656074	naltrindole	Opioid receptor antagonist
7624	-81.28	cp	BRD-K32318651	acyclovir	DNA polymerase inhibitor
7622	-81.27	cp	BRD-K59962020	CHEMBL-374350	NFkB pathway inhibitor
7610	-81.01	cp	BRD-A39415247	norethisterone	Progesterone receptor agonist
7608	-80.96	cp	BRD-K86887724	dofetilide	Potassium channel blocker
7604	-80.95	cp	BRD-K76698671	HNHA	HDAC inhibitor
7598	-80.88	cp	BRD-K84663978	trequinsin	Phosphodiesterase inhibitor
7597	-80.86	cp	BRD-K71103788	duloxetine	Serotonin reuptake inhibitor
7593	-80.79	cp	BRD-A18579359	wiskostatin	Neural Wiskott-Aldrich syndrome protein inhibitor
7592	-80.78	cp	BRD-A87848830	bimatoprost	Prostanoid receptor agonist
7591	-80.74	cp	BRD-K68336408	tyrphostin-AG-1478	EGFR inhibitor
7589	-80.7	cp	BRD-K97309399	thiothixene	Dopamine receptor antagonist
7588	-80.69	cp	BRD-K59369769	tozasertib	Aurora kinase inhibitor
7576	-80.46	cp	BRD-K05804044	AZ-628	RAF inhibitor
7574	-80.39	cp	BRD-K64517075	heliomycin	ATP synthase inhibitor
7570	-80.27	cp	BRD-K72541103	JAK3-inhibitor-I	JAK inhibitor
7566	-80.14	cp	BRD-K56115039	BU-226	Imidazoline receptor ligand
7565	-80.11	cp	BRD-K77008974	WYE-354	MTOR inhibitor
7552	-79.77	cp	BRD-K53737926	amitriptyline	Norepinephrine inhibitor
7549	-79.65	cp	BRD-A99571536	dubinidine	Anti-epileptic
7545	-79.47	cp	BRD-K65814004	diphenyleneiodonium	Nitric oxide synthase inhibitor
7543	-79.42	cp	BRD-A43331270	niguldipine	Calcium channel blocker
7542	-79.39	cp	BRD-K06753942	nobiletin	MEK inhibitor
7540	-79.35	cp	BRD-A77050075	heraclenol	Vitamin K antagonist
7541	-79.35	cp	BRD-A30435184	metergoline	Dopamine receptor agonist
7537	-79.28	cp	BRD-K74514084	pazopanib	KIT inhibitor
7536	-79.27	cp	BRD-A52660433	tetrindole	Monoamine oxidase inhibitor
7530	-79.09	cp	BRD-A80638690	floxuridine	DNA synthesis inhibitor
7524	-79	cp	BRD-K78122587	NNC-55-0396	T-type calcium channel blocker
7522	-78.97	cp	BRD-K68392338	ZK-93426	Benzodiazepine receptor antagonist
7520	-78.91	cp	BRD-K79366068	PSB-069	NTPDase inhibitor
7518	-78.9	cp	BRD-K51918615	iodophenpropit	Histamine receptor antagonist
7513	-78.82	cp	BRD-K54233340	dorsomorphin	AMPK inhibitor
7508	-78.73	cp	BRD-K67637637	olopatadine	Histamine receptor antagonist
7504	-78.69	cp	BRD-K12994359	valdecoxib	Cyclooxygenase inhibitor
7502	-78.68	cp	BRD-A79465854	auranofin	NFkB pathway inhibitor
7503	-78.68	cp	BRD-K86191271	cytosporone-b	NUR77 receptor agonist
7500	-78.66	cp	BRD-K33864865	LY-225910	CCK receptor antagonist
7498	-78.6	cp	BRD-A75769826	SDM25N	Opioid receptor antagonist
7496	-78.51	cp	BRD-K01292756	pimozide	Dopamine receptor antagonist
7494	-78.49	cp	BRD-A95696820	acadesine	AMPK activator
7495	-78.49	cp	BRD-A63043573	cabergoline	Dopamine receptor agonist
7493	-78.43	cp	BRD-K09778810	FGIN-1-27	Inositol monophosphatase inhibitor
7489	-78.39	cp	BRD-A43849199	karakoline	Phytotoxin
7487	-78.34	cp	BRD-K64835161	BRD-K64835161	-666
7485	-78.25	cp	BRD-K42500029	CGP-57380	MAP kinase inhibitor
7481	-78.14	cp	BRD-K72703948	ZM-447439	Aurora kinase inhibitor
7473	-78.01	cp	BRD-K93441486	diphemanil	Acetylcholine receptor antagonist
7470	-77.97	cp	BRD-A37052580	physostigmine	Acetylcholinesterase inhibitor
7469	-77.92	cp	BRD-K37289225	clozapine	Dopamine receptor antagonist
7467	-77.9	cp	BRD-K44353683	nateglinide	Insulin secretagogue
7464	-77.86	cp	BRD-K05653692	DL-PDMP	Glucosyltransferase inhibitor
7461	-77.85	cp	BRD-K90524085	MY-5445	Phosphodiesterase inhibitor
7459	-77.84	cp	BRD-A19661776	mianserin	Serotonin receptor antagonist
7458	-77.82	cp	BRD-K67298865	SB-431542	TGF beta receptor inhibitor
7456	-77.8	cp	BRD-A51714012	venlafaxine	Adrenergic inhibitor
7450	-77.75	cp	BRD-K77133231	PD-169316	p38 MAPK inhibitor
7451	-77.75	cp	BRD-K29178788	dictamnine	Furoquinoline alkaloid
7445	-77.66	cp	BRD-A29082194	gitoxigenin	ATPase inhibitor
7441	-77.56	cp	BRD-K41170226	deoxycholic-acid	G protein-coupled receptor agonist
7439	-77.48	cp	BRD-K28360340	TW-37	BCL inhibitor
7433	-77.35	cp	BRD-A21858158	praziquantel	Anthelmintic
7434	-77.35	cp	BRD-A47598013	citalopram	Serotonin reuptake inhibitor
7432	-77.34	cp	BRD-K37814297	acepromazine	Dopamine receptor antagonist
7430	-77.29	cp	BRD-K23192422	lestaurtinib	FLT3 inhibitor
7426	-77.24	cp	BRD-K53790871	triamcinolone	Glucocorticoid receptor agonist
7425	-77.22	cp	BRD-K06388322	pramipexole	Dopamine receptor agonist
7424	-77.21	cp	BRD-K61250553	loperamide	Opioid receptor agonist
7419	-77.13	cp	BRD-A22256192	terazosin	Adrenergic receptor antagonist
7418	-77.1	cp	BRD-K71035033	masitinib	KIT inhibitor
7404	-76.76	cp	BRD-K02992638	lamivudine	Nucleoside reverse transcriptase inhibitor
7402	-76.75	cp	BRD-K15791587	L-733060	Tachykinin antagonist
7398	-76.66	cp	BRD-K66412701	pazufloxacin	Topoisomerase inhibitor
7393	-76.56	cp	BRD-K89375097	pirenzepine	Acetylcholine receptor antagonist
7390	-76.54	cp	BRD-A49160188	donepezil	Acetylcholinesterase inhibitor
7388	-76.53	cp	BRD-A18917088	estradiol	Contraceptive agent
7381	-76.4	cp	BRD-A19736161	ondansetron	Serotonin receptor antagonist
7379	-76.39	cp	BRD-K99964838	bosutinib	ABL inhibitor
7377	-76.37	cp	BRD-K94512704	spiramide	Dopamine receptor antagonist
7370	-76.24	cp	BRD-A44551378	LFM-A12	EGFR inhibitor
7371	-76.24	cp	BRD-K59522102	piperine	Monoamine oxidase inhibitor
7368	-76.18	cp	BRD-K26664453	cytochalasin-b	Microtubule inhibitor
7363	-76.04	cp	BRD-K15588452	R-96544	Serotonin receptor antagonist
7360	-76.01	cp	BRD-A01320529	salmeterol	Adrenergic receptor agonist
7358	-75.99	cp	BRD-K61691971	avrainvillamide-analog-1	nucleophosmin inhibitor
7353	-75.86	cp	BRD-K04710043	hexamethylenebisacetamide	AKT inhibitor
7351	-75.84	cp	BRD-K96471533	nitazoxanide	Pyruvate ferredoxin oxidoreductase inhibitor
7350	-75.8	cp	BRD-K43068349	AMG-9810	TRPV antagonist
7349	-75.78	cp	BRD-K89732114	trifluoperazine	Dopamine receptor antagonist
7348	-75.77	cp	BRD-K88679075	methandriol	Androgenic steroid
7345	-75.71	cp	BRD-A32349859	methyl-angolensate	Apoptosis inhibitor
7336	-75.46	cp	BRD-K10860596	granisetron	Serotonin receptor antagonist
7335	-75.45	cp	BRD-K14618467	IKK-16	IKK inhibitor
7334	-75.44	cp	BRD-K97399794	quercetin	Polar auxin transport inhibitor
7330	-75.38	cp	BRD-K93480852	KN-93	Calcium-calmodulin dependent protein kinase inhibitor
7329	-75.36	cp	BRD-K81272440	dantrolene	Calcium channel blocker
7323	-75.24	cp	BRD-K54411430	robustic-acid	cAMP inhibitor
7319	-75.19	cp	BRD-K27141178	SB-203186	Serotonin receptor antagonist
7313	-75.12	cp	BRD-K55430733	WAY-629	Serotonin receptor agonist
7312	-75.09	cp	BRD-K76840893	RS-17053	Adrenergic receptor antagonist
7310	-75.08	cp	BRD-K52397688	amperozide	Dopamine receptor antagonist
7301	-74.9	cp	BRD-K01555864	dibenzoylmethane	Antineoplastic
7300	-74.86	cp	BRD-A04308630	genipin	Choleretic agent
7298	-74.8	cp	BRD-K96778649	tyrphostin-47	EGFR inhibitor
7296	-74.78	cp	BRD-K71266197	PSB-06126	NTPDase inhibitor
7291	-74.67	cp	BRD-K88568253	iproniazid	Monoamine oxidase inhibitor
7288	-74.65	cp	BRD-A41519720	ezetimibe	Niemann-Pick C1-like 1 protein antagonist
7279	-74.49	cp	BRD-K61401890	deguelin	NADH-ubiquinone oxidoreductase (Complex I) inhibitor
7273	-74.3	cp	BRD-A10420615	cyclopiazonic-acid	ATPase inhibitor
7268	-74.2	cp	BRD-K50417881	eticlopride	Dopamine receptor antagonist
7265	-74.15	cp	BRD-K35240538	methylprednisolone	Glucocorticoid receptor agonist
7266	-74.15	cp	BRD-A61392169	eliprodil	Glutamate receptor antagonist
7261	-74.01	cp	BRD-K43796186	benzyl-quinazolin-4-yl-amine	EGFR inhibitor
7257	-73.96	cp	BRD-K92758126	gibberellic-acid	NFkB pathway inhibitor
7249	-73.83	cp	BRD-A70649075	sulconazole	Sterol demethylase inhibitor
7247	-73.7	cp	BRD-K63516691	T-0156	Phosphodiesterase inhibitor
7243	-73.62	cp	BRD-K27450477	EHNA	Adenosine deaminase inhibitor
7227	-73.28	cp	BRD-A82238138	budesonide	Glucocorticoid receptor agonist
7224	-73.14	cp	BRD-K07237224	moclobemide	Monoamine oxidase inhibitor
7223	-73.1	cp	BRD-K86930074	cediranib	KIT inhibitor
7218	-73.01	cp	BRD-A99411506	esculin	Antioxidant
7216	-72.97	cp	BRD-K56001384	antimycin-a	ATP synthase inhibitor
7215	-72.96	cp	BRD-K39520573	GW-5074	Leucine rich repeat kinase inhibitor
7211	-72.87	cp	BRD-K09549677	mibefradil	T-type calcium channel blocker
7209	-72.85	cp	BRD-K51485625	ritonavir	HIV protease inhibitor
7204	-72.71	cp	BRD-A64297288	amlodipine	Calcium channel blocker
7205	-72.71	cp	BRD-A63998256	helveticoside	ATPase inhibitor
7201	-72.67	cp	BRD-K33106058	cytarabine	Ribonucleotide reductase inhibitor
7198	-72.59	cp	BRD-K15616905	CCCP	Mitochondrial oxidative phosphorylation uncoupler
7194	-72.52	cp	BRD-K69328504	L-690488	Inositol monophosphatase inhibitor
7192	-72.47	cp	BRD-K27737647	H-89	PKA inhibitor
7190	-72.38	cp	BRD-K59469039	AG-879	Angiogenesis inhibitor
7164	-71.85	cp	BRD-K13049116	BMS-754807	IGF-1 inhibitor
7165	-71.85	cp	BRD-K87696786	LY-456236	Glutamate receptor antagonist
7158	-71.73	cp	BRD-K17896185	FIT	Opioid receptor agonist
7157	-71.72	cp	BRD-K35960502	niclosamide	DNA replication inhibitor
7155	-71.7	cp	BRD-K49111258	prazosin	Adrenergic receptor antagonist
7151	-71.47	cp	BRD-K79877282	PF-543	Sphingosine kinase inhibitor
7150	-71.46	cp	BRD-K02130563	panobinostat	HDAC inhibitor
7147	-71.42	cp	BRD-A08003242	rhodomyrtoxin-b	sodium fluorescein uptake inhibitor
7143	-71.28	cp	BRD-K69195780	NAN-190	Serotonin receptor agonist
7139	-71.25	cp	BRD-K43468059	byssochlamic-acid	Mycotoxin
7137	-71.23	cp	BRD-K05151076	ZK-164015	Estrogen receptor antagonist
7136	-71.21	cp	BRD-A35912562	pregnenolone	Glutamate receptor modulator
7133	-71.12	cp	BRD-K39983086	loteprednol	Glucocorticoid receptor agonist
7129	-71.05	cp	BRD-K83289131	CAY-10618	NAMPT inhibitor
7128	-70.98	cp	BRD-K82143716	flucytosine	Antifungal
7121	-70.78	cp	BRD-A02713983	dihydrodeoxygedunin	Growth factor receptor activator
7112	-70.64	cp	BRD-K05528470	L-745870	Dopamine receptor antagonist
7111	-70.61	cp	BRD-A09722536	cyclophosphamide	DNA alkylating agent
7110	-70.6	cp	BRD-K74236984	UNC-0321	Histone lysine methyltransferase inhibitor
7105	-70.51	cp	BRD-K46056750	AZD-7762	CHK inhibitor
7096	-70.24	cp	BRD-K79930101	GW-583340	EGFR inhibitor
7095	-70.2	cp	BRD-K52219182	BRD-K52219182	Phosphodiesterase inhibitor
7091	-70.14	cp	BRD-K36864847	BD-1047	Adrenergic receptor antagonist
7086	-70.08	cp	BRD-A43940795	tetrahydropalmatine	Serotonin release inhibitor
7087	-70.08	cp	BRD-K10098805	rhapontin	Apoptosis stimulant
7080	-69.94	cp	BRD-K62965247	tipifarnib-P2	farnesyltransferase inhibitor
7078	-69.93	cp	BRD-K19796430	erismodegib	Smoothened receptor antagonist
7076	-69.91	cp	BRD-A39290993	cyproterone	Androgen receptor antagonist
7072	-69.79	cp	BRD-A81177136	KN-62	Calcium-calmodulin dependent protein kinase inhibitor
7070	-69.77	cp	BRD-A55594068	vinblastine	Microtubule inhibitor
7068	-69.73	cp	BRD-K55344148	BU-224	Imidazoline receptor ligand
7055	-69.41	cp	BRD-K95901403	XL-147	PI3K inhibitor
7053	-69.37	cp	BRD-K62289640	lylamine	Cannabinoid receptor agonist
7049	-69.24	cp	BRD-A00758722	noretynodrel	Progestogen hormone
7048	-69.22	cp	BRD-K19554809	MK-212	Serotonin receptor agonist
7043	-69.1	cp	BRD-A79237180	ascorbic-acid	Antioxidant
7041	-69.09	cp	BRD-K11634954	GBR-13069	Dopamine uptake inhibitor
7040	-69.05	cp	BRD-A87719232	naproxen	Cyclooxygenase inhibitor
7037	-68.99	cp	BRD-K46678324	RHO-kinase-inhibitor-II	Rho associated kinase inhibitor
7029	-68.72	cp	BRD-K68191783	ALW-II-38-3	Ephrin inhibitor
7027	-68.67	cp	BRD-K08589866	linsitinib	IGF-1 inhibitor
7019	-68.58	cp	BRD-K41895714	AS-605240	PI3K inhibitor
7007	-68.38	cp	BRD-K75958195	pizotifen	Serotonin receptor antagonist
7003	-68.24	cp	BRD-K50660797	epicatechin	Bacterial DNA gyrase inhibitor
7002	-68.23	cp	BRD-K40901640	cinanserin	Serotonin receptor antagonist
6990	-68.07	cp	BRD-K02965346	SU-11274	Hepatocyte growth factor receptor inhibitor
6988	-68.05	cp	BRD-A03216249	mepivacaine	Potassium channel blocker
6974	-67.86	cp	BRD-A07875874	cilnidipine	Calcium channel blocker
6971	-67.79	cp	BRD-A43082555	loxoprofen	Cyclooxygenase inhibitor
6969	-67.76	cp	BRD-K82091397	SB-239063	p38 MAPK inhibitor
6965	-67.69	cp	BRD-K66874953	pifithrin-alpha	TP53 inhibitor
6961	-67.6	cp	BRD-A49370193	RO-60-0175	Serotonin receptor agonist
6948	-67.27	cp	BRD-A68723818	brompheniramine	Histamine receptor antagonist
6943	-67.23	cp	BRD-K26134695	calpeptin	Calpain inhibitor
6930	-66.93	cp	BRD-K50464341	berbamine	Calmodulin antagonist
6924	-66.74	cp	BRD-K24681473	YM-155	Survivin inhibitor
6921	-66.66	cp	BRD-K32398298	alprazolam	Benzodiazepine receptor agonist
6915	-66.53	cp	BRD-A71765365	mepireserpate	Catecholamine depleting sympatholytic
6911	-66.46	cp	BRD-K07265709	razoxane	Chelating agent
6910	-66.45	cp	BRD-K26863634	BIX-01338	Histone lysine methyltransferase inhibitor
6904	-66.34	cp	BRD-K66896231	BRD-K66896231	Acetylcholinesterase inhibitor
6902	-66.31	cp	BRD-A41112154	oleanolic-acid	G protein-coupled receptor agonist
6901	-66.29	cp	BRD-K59637651	NSC-119889	Protein synthesis inhibitor
6897	-66.08	cp	BRD-A91452556	estradiol-cypionate	Estrogen receptor agonist
6894	-66	cp	BRD-K19295594	gossypol	BCL inhibitor
6892	-65.96	cp	BRD-K73395020	SA-1478088	-666
6885	-65.74	cp	BRD-K14200658	syrosingopine	Vesicular monoamine transporter inhibitor
6884	-65.71	cp	BRD-K21667562	AM-404	Cyclooxygenase inhibitor
6880	-65.56	cp	BRD-U68942961	JW-7-24-1	LCK Inhibitor
6873	-65.47	cp	BRD-K49372556	mofezolac	Cyclooxygenase inhibitor
6871	-65.42	cp	BRD-K59331372	SB-366791	TRPV antagonist
6870	-65.41	cp	BRD-K97799481	theophylline	Adenosine receptor antagonist
6868	-65.38	cp	BRD-K81169441	cerivastatin	HMGCR inhibitor
6864	-65.34	cp	BRD-A13650332	flucloxacillin	Bacterial cell wall synthesis inhibitor
6854	-65.18	cp	BRD-K97752965	nicorandil	Nitric oxide donor
6855	-65.18	cp	BRD-K74501079	azithromycin	Bacterial 50S ribosomal subunit inhibitor
6852	-65.07	cp	BRD-K19352500	prochlorperazine	Dopamine receptor antagonist
6851	-65.06	cp	BRD-K26241953	piceatannol	SYK inhibitor
6849	-64.95	cp	BRD-A12560204	nitrendipine	Calcium channel blocker
6848	-64.92	cp	BRD-K03384561	roquinimex	Angiogenesis inhibitor
6846	-64.87	cp	BRD-K87573634	propylpyrazole	Estrogen receptor agonist
6845	-64.85	cp	BRD-K08996725	zolantidine	Histamine receptor antagonist
6840	-64.78	cp	BRD-A74907996	equol	Estrogen receptor agonist
6837	-64.73	cp	BRD-K51677086	erythromycin	NFkB pathway inhibitor
6830	-64.61	cp	BRD-K67277431	picotamide	Thromboxane receptor antagonist
6828	-64.54	cp	BRD-K24859147	KIN001-242	Protein kinase inhibitor
6829	-64.54	cp	BRD-K17075857	chloroxine	Opioid receptor antagonist
6825	-64.51	cp	BRD-U73238814	QL-XI-92	DDR1 inhibitor
6823	-64.49	cp	BRD-K71430621	clobenpropit	Histamine receptor antagonist
6813	-64.22	cp	BRD-K05977823	tenovins	SIRT inhibitor
6803	-64.1	cp	BRD-K52850071	JAK3-Inhibitor-II	JAK inhibitor
6798	-64.03	cp	BRD-K46556543	canrenoic-acid	Mineralocorticoid receptor antagonist
6793	-63.96	cp	BRD-K21520694	sulfacetamide	PABA antagonist
6792	-63.9	cp	BRD-K50140147	NVP-TAE684	ALK inhibitor
6790	-63.85	cp	BRD-A52650764	ingenol	PKC activator
6789	-63.83	cp	BRD-K55677650	CO-101244	Ionotropic glutamate receptor antagonist
6788	-63.79	cp	BRD-K49668410	clarithromycin	Bacterial 50S ribosomal subunit inhibitor
6787	-63.78	cp	BRD-A53952395	prilocaine	Local anesthetic
6784	-63.77	cp	BRD-A27489425	rolitetracycline	Bacterial 30S ribosomal subunit inhibitor
6785	-63.77	cp	BRD-K60623809	SU-11652	Tyrosine kinase inhibitor
6778	-63.61	cp	BRD-K57631554	aminolevulinic-acid	Oxidizing agent
6772	-63.48	cp	BRD-K10466330	AVA	Nucleophosmin inhibitor
6765	-63.37	cp	BRD-K67578145	GDC-0879	RAF inhibitor
6759	-63.16	cp	BRD-K47278471	diphenhydramine	Histamine receptor antagonist
6752	-63.08	cp	BRD-A81233518	glycopyrrolate	Acetylcholine receptor antagonist
6751	-63.06	cp	BRD-K81209159	herniarin	Acetylcholinesterase inhibitor
6750	-63.02	cp	BRD-K81473089	tacrine	Acetylcholinesterase inhibitor
6746	-62.97	cp	BRD-K20338176	cefaclor	Bacterial cell wall synthesis inhibitor
6739	-62.9	cp	BRD-K72420232	WZ-4002	EGFR inhibitor
6736	-62.85	cp	BRD-K19227686	phenolphthalein	Indicator dye
6735	-62.84	cp	BRD-K15567136	papaverine	Phosphodiesterase inhibitor
6734	-62.83	cp	BRD-A04553218	chlorphenamine	Histamine receptor antagonist
6733	-62.81	cp	BRD-K91601245	mercaptopurine	Immunosuppressant
6731	-62.79	cp	BRD-K66296774	fluvastatin	HMGCR inhibitor
6730	-62.77	cp	BRD-K55127134	fluphenazine	Dopamine receptor antagonist
6724	-62.74	cp	BRD-K10467831	tibolone	Androgen receptor agonist
6721	-62.7	cp	BRD-K19284129	salvinorin-a	Opioid receptor agonist
6718	-62.59	cp	BRD-A74980173	gatifloxacin	Bacterial DNA gyrase inhibitor
6717	-62.58	cp	BRD-K11630072	carmofur	Thymidylate synthase inhibitor
6708	-62.41	cp	BRD-K89162000	tandutinib	FLT3 inhibitor
6697	-62.25	cp	BRD-K40742111	baeomycesic-acid	Lipoxygenase inhibitor
6698	-62.25	cp	BRD-K87991767	umbelliferone	Cyclooxygenase inhibitor
6695	-62.19	cp	BRD-K42452249	EO-1428	p38 MAPK inhibitor
6694	-62.18	cp	BRD-A28970875	puromycin	Protein synthesis inhibitor
6688	-62.07	cp	BRD-K07881437	danusertib	Aurora kinase inhibitor
6684	-61.91	cp	BRD-K63165456	norcyclobenzaprine	Adrenergic receptor agonist
6685	-61.91	cp	BRD-A72758037	asiatic-acid	Apoptosis stimulant
6683	-61.86	cp	BRD-K99291625	SB-203580	p38 MAPK inhibitor
6677	-61.69	cp	BRD-K63343048	orlistat	Lipase inhibitor
6675	-61.63	cp	BRD-K76064317	tyrphostin-AG-1296	FLT3 inhibitor
6669	-61.6	cp	BRD-K41051431	mecillinam	Bacterial cell wall synthesis inhibitor
6667	-61.59	cp	BRD-K76617868	fasudil	Rho associated kinase inhibitor
6662	-61.43	cp	BRD-A58564983	selamectin	Nematocide
6659	-61.42	cp	BRD-A81795050	U-18666A	Oxidosqualene cyclase inhibitor
6660	-61.42	cp	BRD-K99946902	hexylresorcinol	Local anesthetic
6647	-61.07	cp	BRD-A37492983	iocetamic-acid	Radiopaque medium
6645	-61.04	cp	BRD-K29458283	chlorambucil	DNA inhibitor
6643	-61	cp	BRD-A10070317	propranolol	Adrenergic receptor antagonist
6639	-60.95	cp	BRD-K28578425	cilostamide	Phosphodiesterase inhibitor
6633	-60.8	cp	BRD-K15715913	fluperlapine	Serotonin receptor antagonist
6631	-60.73	cp	BRD-A95096829	PNU-96415E	Dopamine receptor antagonist
6630	-60.72	cp	BRD-K46441700	GR-55562	Serotonin receptor antagonist
6629	-60.71	cp	BRD-K63915849	AS-604850	PI3K inhibitor
6621	-60.51	cp	BRD-K30990140	FR-122047	Cyclooxygenase inhibitor
6616	-60.47	cp	BRD-A78877355	nefopam	Cyclooxygenase inhibitor
6612	-60.39	cp	BRD-K20742498	RS-39604	Serotonin receptor antagonist
6608	-60.29	cp	BRD-K09963420	saquinavir	HIV protease inhibitor
6607	-60.25	cp	BRD-K56558538	ambroxol	Sodium channel blocker
6585	-59.88	cp	BRD-K12244279	MEK1-2-inhibitor	MEK inhibitor
6572	-59.64	cp	BRD-A31521121	methocarbamol	Muscle relaxant
6563	-59.48	cp	BRD-K15834839	lobendazole	Anthelmintic
6553	-59.35	cp	BRD-K52020312	metronidazole	DNA inhibitor
6552	-59.34	cp	BRD-A98283014	calmidazolium	Calcium channel blocker
6549	-59.32	cp	BRD-A35108200	dexamethasone	Glucocorticoid receptor agonist
6545	-59.18	cp	BRD-K84955386	hyperoside	Glucosidase inhibitor
6536	-58.98	cp	BRD-U66370498	androstanol	CAR antagonist
6538	-58.98	cp	BRD-K55044200	amoxicillin	Penicillin binding protein inhibitor
6535	-58.94	cp	BRD-A39052811	mosapride	Serotonin receptor agonist
6532	-58.89	cp	BRD-K81916719	triclabendazole	Microtubule inhibitor
6533	-58.89	cp	BRD-K04414442	SB-222200	Tachykinin antagonist
6529	-58.83	cp	BRD-A36471396	biperiden	Acetylcholine receptor antagonist
6515	-58.55	cp	BRD-K20287671	SU-4312	PDGFR receptor inhibitor
6508	-58.45	cp	BRD-A20589515	dihydroxyphenylglycine	Glutamate receptor agonist
6509	-58.45	cp	BRD-K78126613	menadione	Mitochondrial DNA polymerase inhibitor
6507	-58.41	cp	BRD-K30649484	mafenide	Carbonic anhydrase inhibitor
6499	-58.23	cp	BRD-K22031190	diflunisal	Prostanoid receptor antagonist
6493	-58.16	cp	BRD-K73290745	ICI-199441	Opioid receptor agonist
6491	-58.14	cp	BRD-A15530910	carpindolol	Adrenergic receptor antagonist
6492	-58.14	cp	BRD-K52989797	clomipramine	Serotonin transporter inhibitor (SERT)
6489	-58.12	cp	BRD-A22707317	SB-205384	GABA receptor modulator
6485	-58.08	cp	BRD-A62890442	3-methyl-GABA	GABA aminotransferase activator
6480	-58.04	cp	BRD-A09925278	etilefrine	Adrenergic receptor agonist
6477	-58.03	cp	BRD-K08998509	fananserin	Dopamine receptor antagonist
6473	-58.01	cp	BRD-K79353516	indolophenanthridine	CALY activator
6472	-57.99	cp	BRD-A45499626	UBP-302	Glutamate receptor antagonist
6468	-57.92	cp	BRD-A34817987	itraconazole	Cytochrome P450 inhibitor
6467	-57.87	cp	BRD-A39969961	eplerenone	Cytochrome P450 inhibitor
6465	-57.84	cp	BRD-K01436366	XMD-1150	Leucine rich repeat kinase inhibitor
6463	-57.81	cp	BRD-K45479396	BP-554	Serotonin receptor agonist
6464	-57.81	cp	BRD-K38197229	bumetanide	Solute carrier family member inhibitor
6461	-57.77	cp	BRD-K49027941	PSB-1115	Adenosine receptor antagonist
6453	-57.68	cp	BRD-A16478930	amcinonide	Glucocorticoid receptor agonist
6452	-57.66	cp	BRD-A96255180	ribavirin	Antiviral
6451	-57.64	cp	BRD-K33818169	GW-3965	LXR agonist
6448	-57.5	cp	BRD-K61829047	7b-cis	Exportin antagonist
6442	-57.44	cp	BRD-K31611373	fluprostenol	Prostanoid receptor agonist
6441	-57.42	cp	BRD-K37691127	hinokitiol	Tyrosinase inhibitor
6433	-57.27	cp	BRD-K93618743	ipriflavone	Bone resorption inhibitor
6430	-57.2	cp	BRD-K15842202	eudesmic-acid	-666
6419	-56.94	cp	BRD-K24201553	SB-269970	Serotonin receptor antagonist
6417	-56.82	cp	BRD-K06895174	cisapride	Serotonin receptor agonist
6416	-56.79	cp	BRD-K52080565	rilmenidine	Imidazoline receptor agonist
6415	-56.77	cp	BRD-K54094468	remoxipride	Dopamine receptor antagonist
6409	-56.67	cp	BRD-K51805276	temefos	Cholinesterase inhibitor
6408	-56.66	cp	BRD-K20141153	atomoxetine	Norepinephrine transporter inhibitor
6404	-56.5	cp	BRD-K96119599	leucodin	Melanin inhibitor
6400	-56.46	cp	BRD-K82577285	dipropyl-dopamine	Dopamine receptor agonist
6397	-56.45	cp	BRD-K50495309	SRC-kinase-inhibitor-I	SRC inhibitor
6398	-56.45	cp	BRD-K64746805	MBCQ	Phosphodiesterase inhibitor
6395	-56.43	cp	BRD-K44779798	miglitol	Glucosidase inhibitor
6390	-56.25	cp	BRD-K93645900	tadalafil	Phosphodiesterase inhibitor
6385	-56.2	cp	BRD-K84566043	fenpiverinium	Acetylcholine receptor antagonist
6386	-56.2	cp	BRD-K93325701	damnacanthal	SRC inhibitor
6387	-56.2	cp	BRD-A69917777	aminopentamide	Acetylcholine receptor antagonist
6381	-56.12	cp	BRD-K94887716	TFMPP	Serotonin receptor agonist
6379	-56.09	cp	BRD-K90259198	W-7	Calmodulin antagonist
6364	-55.83	cp	BRD-A17428743	BW-723C86	Serotonin receptor agonist
6361	-55.79	cp	BRD-K67102207	phenylbutyrate	HDAC inhibitor
6359	-55.78	cp	BRD-K41564320	purvalanol-b	Tyrosine kinase inhibitor
6358	-55.75	cp	BRD-K88625236	nonoxynol-9	Membrane integrity inhibitor
6357	-55.72	cp	BRD-K16508793	diazepam	Benzodiazepine receptor agonist
6348	-55.56	cp	BRD-K03319035	maprotiline	Norepinephrine reuptake inhibitor
6346	-55.52	cp	BRD-K14821540	FCCP	Mitochondrial oxidative phosphorylation uncoupler
6345	-55.47	cp	BRD-K47192521	icosapent	Platelet aggregation inhibitor
6341	-55.35	cp	BRD-K40965114	cyanopindolol	Adrenergic receptor antagonist
6334	-55.1	cp	BRD-K22227508	targinine	Nitric oxide synthase inhibitor
6332	-55.05	cp	BRD-K32906660	bis-tyrphostin	EGFR inhibitor
6329	-54.95	cp	BRD-K04976539	aminogenistein	SRC inhibitor
6327	-54.92	cp	BRD-K73991644	isoquercetin	Aldose reductase inhibitor
6322	-54.83	cp	BRD-K08619838	tremorine	Acetylcholine receptor agonist
6315	-54.68	cp	BRD-K10573841	tunicamycin	GLCNAC phosphotransferase inhibitor
6313	-54.67	cp	BRD-K21806131	tegaserod	Serotonin receptor partial agonist
6309	-54.51	cp	BRD-K03981224	ethisterone	Progestogen hormone
6304	-54.48	cp	BRD-K17561142	amiodarone	Potassium channel blocker
6303	-54.46	cp	BRD-K70281171	U-99194	Dopamine receptor antagonist
6299	-54.42	cp	BRD-A17453586	MDL-72832	Serotonin receptor agonist
6296	-54.36	cp	BRD-K94441233	mevastatin	HMGCR inhibitor
6295	-54.35	cp	BRD-K43736954	cortisone	Glucocorticoid receptor agonist
6294	-54.34	cp	BRD-K65910366	KUC103904N	-666
6291	-54.3	cp	BRD-K00673382	famotidine	Histamine receptor antagonist
6285	-54.21	cp	BRD-K59570838	homoveratrylamine	Dopamine analog
6277	-54.05	cp	BRD-A48261811	argatroban	Thrombin inhibitor
6273	-53.95	cp	BRD-K46469693	SCH-442416	Adenosine receptor antagonist
6268	-53.88	cp	BRD-A31007383	SDZ-WAG-994	Adenosine receptor agonist
6263	-53.86	cp	BRD-K40992116	parachlorophenol	Anti-infective
6261	-53.67	cp	BRD-K11801786	trimidox	Ribonucleotide reductase inhibitor
6258	-53.55	cp	BRD-K63923597	barasertib	Aurora kinase inhibitor
6252	-53.39	cp	BRD-A09467419	mebeverine	Acetylcholine receptor antagonist
6240	-53.24	cp	BRD-A42571354	cetirizine	Histamine receptor antagonist
6235	-53.18	cp	BRD-K50891186	GR-103691	Dopamine receptor antagonist
6231	-53.14	cp	BRD-K29555132	arachidonamide	Cannabinoid receptor agonist
6232	-53.14	cp	BRD-A61470182	n-formylmethionylalanine	macrophage activator
6230	-53.13	cp	BRD-K82216340	medroxyprogesterone	progesterone receptor agonist
6224	-53.06	cp	BRD-A25234499	aminoglutethimide	Glucocorticoid receptor antagonist
6217	-52.8	cp	BRD-A70407468	PSB-36	Adenosine receptor antagonist
6213	-52.74	cp	BRD-A19195498	trimipramine	Norepinephrine reuptake inhibitor
6202	-52.47	cp	BRD-A71262238	nafadotride	Dopamine receptor antagonist
6201	-52.42	cp	BRD-A66435872	HTMT	Histamine receptor agonist
6200	-52.4	cp	BRD-A04706586	bucladesine	Adenosine receptor agonist
6198	-52.38	cp	BRD-K41868777	W-5	Calmodulin antagonist
6189	-52.19	cp	BRD-K86301799	dipyridamole	Phosphodiesterase inhibitor
6187	-52.15	cp	BRD-K20197062	SA-94315	Caspase inhibitor
6178	-51.95	cp	BRD-K59419204	AM-281	Cannabinoid receptor antagonist
6174	-51.78	cp	BRD-K26117720	gingerol	Nitric oxide synthase inhibitor
6167	-51.72	cp	BRD-K35128472	2-aminopurine	Serine/threonine kinase inhibitor
6160	-51.6	cp	BRD-K42098891	protriptyline	Tricyclic antidepressant
6157	-51.55	cp	BRD-U44618005	WH-4023	SRC inhibitor
6154	-51.52	cp	BRD-K16233984	eriochrome-black-t	Azo dye
6151	-51.5	cp	BRD-K18678457	ZD-7288	HCN channel blocker
6150	-51.49	cp	BRD-K05737787	isoeugenol	Nitric oxide production inhibitor
6149	-51.47	cp	BRD-K93332168	isocarboxazid	Monoamine oxidase inhibitor
6138	-51.29	cp	BRD-K72093121	vidarabine	Antiviral
6127	-51	cp	BRD-K15891719	tenofovir	Reverse transcriptase inhibitor
6128	-51	cp	BRD-A39230911	chlorphensin	Muscle relaxant
6126	-50.97	cp	BRD-K78084463	W-12	Calmodulin antagonist
6123	-50.95	cp	BRD-K21283037	riluzole	Glutamate inhibitor
6121	-50.91	cp	BRD-K49328571	dasatinib	BCR-ABL kinase inhibitor
6117	-50.86	cp	BRD-A78377521	monastrol	Kinesin-like spindle protein inhibitor
6113	-50.76	cp	BRD-K72903603	zidovudine	Reverse transcriptase inhibitor
6105	-50.59	cp	BRD-K11853856	PJ-34	PARP inhibitor
6104	-50.58	cp	BRD-K30240666	clemastine	Histamine receptor antagonist
6102	-50.55	cp	BRD-K51066026	aminoindazole	Ionophore
6101	-50.53	cp	BRD-K74133369	oligomycin-a	ATP synthase inhibitor
6090	-50.32	cp	BRD-A72596465	GW-6471	PPAR receptor antagonist
6089	-50.31	cp	BRD-K91733562	secoisolariciresinol	Antioxidant
6087	-50.27	cp	BRD-A60294240	tribenoside	Anti-inflammatory
6085	-50.25	cp	BRD-K30697463	desoximetasone	Glucocorticoid receptor agonist
6082	-50.22	cp	BRD-K54472332	elvitegravir	HIV integrase inhibitor
6083	-50.22	cp	BRD-K05181084	NGB-2904	Dopamine receptor antagonist
6080	-50.19	cp	BRD-A65767837	hydrocortisone	Glucocorticoid receptor agonist
6078	-50.18	cp	BRD-A34205397	suloctidil	Adrenergic receptor antagonist
6079	-50.18	cp	BRD-A08709697	heliotrine	Pyrrolizidine alkaloid
6077	-50.15	cp	BRD-K80639402	SB-258585	Serotonin receptor antagonist
6074	-50.11	cp	BRD-A38749782	fludrocortisone	Glucocorticoid receptor agonist
6068	-49.9	cp	BRD-A34208323	VU-0404997-2	Glutamate receptor modulator
6065	-49.83	cp	BRD-A44448661	pentobarbital	Barbiturate antiepileptic
6062	-49.71	cp	BRD-K21548250	moracizine	Sodium channel blocker
6059	-49.69	cp	BRD-K88304388	dextrorphan	Glutamate receptor antagonist
6057	-49.61	cp	BRD-K81062487	taurocholic-acid	Bile acid
6049	-49.47	cp	BRD-K42221274	NNC-711	GAT inhibitor
6045	-49.42	cp	BRD-A92161634	scopoline	Acetylcholine receptor antagonist
6046	-49.42	cp	BRD-K02404261	caffeine	Adenosine receptor antagonist
6041	-49.36	cp	BRD-K32744045	disulfiram	Aldehyde dehydrogenase inhibitor
6039	-49.32	cp	BRD-K82562631	tolmetin	Cyclooxygenase inhibitor
6036	-49.25	cp	BRD-A77299732	salubrinal	Eukaryotic translation initiation factor inhibitor
6031	-49.15	cp	BRD-A66927094	nemonapride	Dopamine receptor antagonist
6029	-49.08	cp	BRD-K10177585	PSB-11	Adenosine receptor antagonist
6028	-49.06	cp	BRD-K62736196	guanabenz	-666
6027	-49.05	cp	BRD-K10065684	dantron	Laxative
6025	-49.02	cp	BRD-K83508485	FK-888	Tachykinin antagonist
6014	-48.82	cp	BRD-K33226500	indinavir	HIV protease inhibitor
6013	-48.81	cp	BRD-K70401845	erlotinib	EGFR inhibitor
6006	-48.58	cp	BRD-K29113274	ketoconazole	Sterol demethylase inhibitor
6005	-48.57	cp	BRD-K62858456	lomerizine	Calcium channel blocker
6001	-48.5	cp	BRD-K15196155	IBC-293	Hydroxycarboxylic acid receptor agonist
5997	-48.46	cp	BRD-K09186807	KIN001-244	Phosphoinositide dependent kinase inhibitor
5991	-48.34	cp	BRD-K89708791	rifaximin	RNA synthesis inhibitor
5988	-48.31	cp	BRD-K21350491	phenamil	TRPV antagonist
5983	-48.14	cp	BRD-K94920105	DR-2313	PARP inhibitor
5981	-48.07	cp	BRD-K43290182	Ro-04-6790	Serotonin receptor antagonist
5977	-48.02	cp	BRD-A68039575	liquiritigenin	Aromatase inhibitor
5972	-47.89	cp	BRD-A94709349	metaxalone	Muscle relaxant
5964	-47.75	cp	BRD-K20714604	RS-56812	Serotonin receptor partial agonist
5959	-47.71	cp	BRD-K78485176	olmesartan	Angiotensin receptor antagonist
5958	-47.68	cp	BRD-K91290917	amodiaquine	Histamine receptor agonist
5951	-47.5	cp	BRD-A82590476	SDZ-NKT-343	Tachykinin antagonist
5947	-47.45	cp	BRD-K25311561	KU-55933	ATM kinase inhibitor
5942	-47.4	cp	BRD-K77175907	calcifediol	Vitamin D receptor agonist
5937	-47.37	cp	BRD-K87919739	tyrphostin-AG-825	Receptor tyrosine protein kinase inhibitor
5938	-47.37	cp	BRD-A10903566	imiloxan	Adrenergic receptor antagonist
5934	-47.36	cp	BRD-K13087974	4,5-dianilinophthalimide	EGFR inhibitor
5931	-47.3	cp	BRD-A47829399	artesunate	DNA synthesis inhibitor
5928	-47.27	cp	BRD-K49481516	galantamine	Acetylcholinesterase inhibitor
5919	-47.09	cp	BRD-K00610438	altanserin	Serotonin receptor antagonist
5915	-47.04	cp	BRD-K18909381	CGS-12066B	Serotonin receptor agonist
5912	-46.98	cp	BRD-K89055274	alverine	Muscle relaxant
5905	-46.86	cp	BRD-K66788707	fludarabine	DNA synthesis inhibitor
5902	-46.84	cp	BRD-K87158025	benzamil	Sodium channel blocker
5899	-46.76	cp	BRD-K50422030	clomethiazole	GABA receptor antagonist
5892	-46.68	cp	BRD-K43860855	iobenguane	Antineoplastic
5890	-46.66	cp	BRD-K76587808	fraxetin	Antioxidant
5884	-46.54	cp	BRD-K72726508	arcyriaflavin-a	CDK inhibitor
5882	-46.51	cp	BRD-K30189597	SYK-inhibitor	SYK inhibitor
5872	-46.36	cp	BRD-A73368467	fexofenadine	Histamine receptor antagonist
5867	-46.31	cp	BRD-A30205217	ethotoin	Hydantoin antiepileptic
5863	-46.25	cp	BRD-K25079130	avrainvillamide-analog-4	nucleophosmin inhibitor
5856	-46.16	cp	BRD-K20482099	rutin	Antioxidant
5853	-46.11	cp	BRD-K00206590	P-1075	ATP channel activator
5852	-46.08	cp	BRD-A83937277	mephenytoin	Hydantoin antiepileptic
5848	-46.04	cp	BRD-A93477898	PETCM	Caspase activator
5845	-45.98	cp	BRD-A41301928	bongkrek-acid	Mitochondrial ADP, ATP translocase inhibitor
5828	-45.69	cp	BRD-K39987650	bisacodyl	Laxative
5826	-45.68	cp	BRD-A85587465	bemesetron	Serotonin receptor antagonist
5806	-45.26	cp	BRD-A55946879	BW-B70C	Lipoxygenase inhibitor
5803	-45.14	cp	BRD-K71512533	SNS-314	Aurora kinase inhibitor
5802	-45.03	cp	BRD-K31843556	T-0070907	PPAR receptor antagonist
5796	-44.94	cp	BRD-K86434416	selegiline	Monoamine oxidase inhibitor
5794	-44.87	cp	BRD-K44497846	enalapril	ACE inhibitor
5790	-44.8	cp	BRD-K63641886	cefuroxime	Bacterial cell wall synthesis inhibitor
5786	-44.73	cp	BRD-K82561139	ricinine	Casein kinase inhibitor
5780	-44.68	cp	BRD-A84702196	penicillin	Bacterial cell wall synthesis inhibitor
5779	-44.6	cp	BRD-K25310650	ormetoprim	Bacterial antifolate
5775	-44.49	cp	BRD-K64044582	linoleamide	ACAT inhibitor
5773	-44.44	cp	BRD-A59174698	ritodrine	Adrenergic receptor agonist
5771	-44.43	cp	BRD-K90789829	nefazodone	Adrenergic inhibitor
5762	-44.28	cp	BRD-K18779551	bifemelane	Acetylcholine release stimulant
5761	-44.24	cp	BRD-K31054881	BMY-7378	Adrenergic receptor antagonist
5760	-44.22	cp	BRD-K40990712	hexamethyleneamiloride	Sodium/hydrogen antiport inhibitor
5759	-44.21	cp	BRD-A05186015	bupropion	Dopamine uptake inhibitor
5755	-44.18	cp	BRD-A68929948	DAPT-GSI-IX	Gamma secretase inhibitor
5753	-44.07	cp	BRD-K92413528	thiazolidinecarboxylic-acid	Reducing agent
5752	-44.04	cp	BRD-K66353228	zoxazolamine	Myorelaxant
5751	-44.03	cp	BRD-K13571841	pepstatin	Aspartic protease inhibitor
5744	-43.91	cp	BRD-K55191674	benzylpenicillin	Penicillin binding protein inhibitor
5740	-43.85	cp	BRD-A75478957	PD-166793	Metalloproteinase inhibitor
5739	-43.83	cp	BRD-K44442813	pidotimod	Interferon receptor agonist
5737	-43.8	cp	BRD-A26032986	zaldaride	Calmodulin antagonist
5731	-43.67	cp	BRD-A30655177	LFM-A13	BTK inhibitor
5727	-43.59	cp	BRD-K50135270	GBR-12935	Dopamine uptake inhibitor
5722	-43.54	cp	BRD-A71657825	2-(biphenyl-4-ylsulfonamido)pentanedioic-acid	Matrix metalloprotease inhibitor
5719	-43.51	cp	BRD-A57382968	piroxicam	Cyclooxygenase inhibitor
5709	-43.34	cp	BRD-K30563334	rifabutin	Protein synthesis inhibitor
5704	-43.19	cp	BRD-K23383398	T-0901317	LXR agonist
5700	-43.16	cp	BRD-K09764130	mead-ethanolamide	Cannabinoid receptor agonist
5701	-43.16	cp	BRD-K13261168	LY-16350	Dopamine receptor agonist
5697	-43.13	cp	BRD-K06014311	DH-97	Melatonin receptor antagonist
5693	-43.11	cp	BRD-K56047318	RHC-80267	Triacylglycerol lipase inhibitor
5690	-43.09	cp	BRD-K40578143	GR-79236	Adenosine receptor agonist
5685	-42.92	cp	BRD-K60762818	desipramine	Tricyclic antidepressant
5682	-42.81	cp	BRD-K45330754	diethylstilbestrol	Estrogen receptor agonist
5681	-42.78	cp	BRD-K40175214	torin-1	MTOR inhibitor
5677	-42.73	cp	BRD-K54095730	CMPD-1	p38 MAPK inhibitor
5674	-42.65	cp	BRD-A55913614	primaquine	Antimalarial
5673	-42.64	cp	BRD-K82941592	rosuvastatin	HMGCR inhibitor
5666	-42.56	cp	BRD-A42423104	benproperine	Antitussive
5667	-42.56	cp	BRD-K17705806	JTC-801	Opioid receptor antagonist
5668	-42.56	cp	BRD-A37837077	cyclazosin	Adrenergic receptor antagonist
5665	-42.55	cp	BRD-K05901394	terguride	Dopamine receptor agonist
5664	-42.54	cp	BRD-K39621635	artemether	Antimalarial
5663	-42.5	cp	BRD-K89210380	biotin	Vitamin B
5654	-42.34	cp	BRD-K68997413	PF-3845	FAAH inhibitor
5652	-42.33	cp	BRD-A74500471	ethambutol	Bacterial cell wall synthesis inhibitor
5647	-42.19	cp	BRD-K51313569	palbociclib	CDK inhibitor
5644	-42.17	cp	BRD-K35430135	SR-59230A	Adrenergic receptor antagonist
5642	-42.14	cp	BRD-K97863768	prothionamide	Mycobacterium tuberculosis enoyl-[acyl-carrier-protein] reductase [NADH] (inhA) inhibitor
5643	-42.14	cp	BRD-A75455249	kavain	Calcium channel modulator
5640	-42.12	cp	BRD-K79124250	ioxaglic-acid	Radiopaque medium
5634	-42.03	cp	BRD-A22713669	BVT-948	Tyrosine phosphatase inhibitor
5636	-42.03	cp	BRD-K07888107	depudecin	HDAC inhibitor
5631	-42.02	cp	BRD-K34437622	BRD-K34437622	Thymidylate synthase inhibitor
5632	-42.02	cp	BRD-K81225797	SCH-58261	Adenosine receptor antagonist
5630	-41.89	cp	BRD-K48722258	dilazep	Adenosine reuptake inhibitor
5616	-41.72	cp	BRD-K07736136	VX-702	p38 MAPK inhibitor
5611	-41.51	cp	BRD-K14221570	benzopurpurin-4b	HIV entry inhibitor
5606	-41.42	cp	BRD-K15409150	penfluridol	T-type calcium channel blocker
5601	-41.34	cp	BRD-K16621777	enobosarm	Androgen receptor modulator
5594	-41.26	cp	BRD-K89626439	sirolimus	MTOR inhibitor
5586	-41.18	cp	BRD-K56745457	azauridine	Antiviral
5579	-41.07	cp	BRD-K62310379	fluticasone	Glucocorticoid receptor agonist
5580	-41.07	cp	BRD-A15131297	benazepril	ACE inhibitor
5577	-41.04	cp	BRD-K70883034	nimetazepam	GABA receptor agonist
5574	-40.97	cp	BRD-A59215453	lobelanidine	Acetylcholine receptor antagonist
5575	-40.97	cp	BRD-K96402602	farnesylthiotriazole	PPMTase inhibitor
5569	-40.91	cp	BRD-K50388907	fenofibrate	PPAR receptor agonist
5566	-40.89	cp	BRD-K99447003	enalaprilat	ACE inhibitor
5559	-40.74	cp	BRD-K81128206	edrophonium	Acetylcholinesterase inhibitor
5552	-40.55	cp	BRD-A41722204	sulmazole	Adenosine receptor antagonist
5547	-40.5	cp	BRD-A50675702	fipronil	GABA gated chloride channel blocker
5539	-40.4	cp	BRD-K05464208	JX-401	p38 MAPK inhibitor
5538	-40.37	cp	BRD-K89014967	AS-703026	MEK inhibitor
5537	-40.35	cp	BRD-A83892713	rifampicin	RNA polymerase inhibitor
5534	-40.33	cp	BRD-K00337317	NU-7441	DNA dependent protein kinase inhibitor
5531	-40.31	cp	BRD-A00267231	hemado	Adenosine receptor agonist
5532	-40.31	cp	BRD-K83963101	MLN-8054	Aurora kinase inhibitor
5524	-40.21	cp	BRD-K39462424	dexchlorpheniramine	Histamine receptor antagonist
5522	-40.19	cp	BRD-A49734948	foliosidine	Plant alkaloid
5515	-39.99	cp	BRD-A70449690	forskolin	Adenylyl cyclase activator
5512	-39.97	cp	BRD-K12260308	xanthoxyline	Antifungal
5510	-39.94	cp	BRD-A17535965	gelsemine	Acetylcholine receptor antagonist
5507	-39.92	cp	BRD-K90864987	cobalt(II)-chloride	HSP inducer
5503	-39.84	cp	BRD-K04853698	LDN-193189	Serine/threonine kinase inhibitor
5499	-39.73	cp	BRD-K84709232	caffeic-acid	Lipoxygenase inhibitor
5495	-39.63	cp	BRD-K06854232	AM-580	Retinoid receptor agonist
5494	-39.62	cp	BRD-A20131130	2',5'-dideoxyadenosine	Adenylyl cyclase inhibitor
5485	-39.46	cp	BRD-K79145749	dibenzepin	Norepinephrine reuptake inhibitor
5483	-39.45	cp	BRD-K66019333	oxantel	Anthelmintic
5480	-39.4	cp	BRD-K87510569	RS-504393	CC chemokine receptor antagonist
5478	-39.39	cp	BRD-K14681867	somatostatin	Somatostatin receptor agonist
5477	-39.38	cp	BRD-K80451230	zamifenacin	Acetylcholine receptor antagonist
5466	-39.21	cp	BRD-K09416995	lovastatin	HMGCR inhibitor
5465	-39.2	cp	BRD-K93433262	alfacalcidol	Vitamin D receptor agonist
5464	-39.19	cp	BRD-K15025317	BAY-11-7821	NFkB pathway inhibitor
5459	-39.06	cp	BRD-K96037667	norethindrone	Progesterone receptor agonist
5455	-39.04	cp	BRD-K25224017	pirenperone	Serotonin receptor antagonist
5447	-38.95	cp	BRD-K28912512	nicotinamide	Protein synthesis stimulant
5442	-38.88	cp	BRD-A54596827	solifenacin	Acetylcholine receptor antagonist
5443	-38.88	cp	BRD-A22769835	homochlorcyclizine	Antihistamine
5440	-38.85	cp	BRD-K68341547	W-9	Calmodulin antagonist
5438	-38.83	cp	BRD-A53576514	orphenadrine	Acetylcholine receptor antagonist
5434	-38.76	cp	BRD-K74305673	IKK-2-inhibitor-V	IKK inhibitor
5433	-38.75	cp	BRD-K33882852	ZK-93423	Benzodiazepine receptor agonist
5425	-38.64	cp	BRD-K04412738	tramadol	Norepinephrine reuptake inhibitor
5417	-38.57	cp	BRD-K30743633	TCPOBOP	CAR agonist
5415	-38.52	cp	BRD-K32830106	guanfacine	Adrenergic receptor agonist
5413	-38.51	cp	BRD-K25905511	buddleoflavonoloside	Acetylcholinesterase inhibitor
5407	-38.41	cp	BRD-A77349281	RK-682	Tyrosine phosphatase inhibitor
5403	-38.35	cp	BRD-K61993165	niacin	NAD precursor with lipid lowering effects
5393	-38.15	cp	BRD-A67981824	cefotaxime	Bacterial cell wall synthesis inhibitor
5392	-38.12	cp	BRD-K96740444	itopride	Dopamine receptor antagonist
5391	-38.1	cp	BRD-K74212935	ergocryptine	Dopamine agonist
5382	-37.94	cp	BRD-K15601958	SEW-2871	Lysophospholipid receptor agonist
5379	-37.92	cp	BRD-K70358946	aripiprazole	Serotonin receptor agonist
5376	-37.89	cp	BRD-K25741894	skimmianine	Acetylcholinesterase inhibitor
5377	-37.89	cp	BRD-A03623303	metoprolol	Adrenergic receptor antagonist
5374	-37.75	cp	BRD-A13188892	doxazosin	Adrenergic receptor antagonist
5365	-37.58	cp	BRD-K51816706	oxindole-I	VEGFR inhibitor
5362	-37.49	cp	BRD-K66175015	afatinib	EGFR inhibitor
5361	-37.48	cp	BRD-A80641450	FR-139317	Endothelin receptor antagonist
5341	-37.12	cp	BRD-U33728988	QL-X-138	MTOR inhibitor
5338	-37.09	cp	BRD-K88551539	CAY-10585	HIF modulator
5335	-37.03	cp	BRD-A87606379	nadolol	Adrenergic receptor antagonist
5328	-36.94	cp	BRD-K17796732	JWH-015	Cannabinoid receptor agonist
5326	-36.87	cp	BRD-K01815685	indole	aryl hydrocarbon receptor agonist
5323	-36.85	cp	BRD-A50928468	norgestrel	Progesterone receptor agonist
5319	-36.79	cp	BRD-K87024524	phenelzine	Monoamine oxidase inhibitor
5320	-36.79	cp	BRD-K73391359	quinisocaine	Local anesthetic
5305	-36.61	cp	BRD-K53220666	trimetozine	Sedative
5297	-36.46	cp	BRD-K87990216	piretanide	Glucocorticoid receptor agonist
5296	-36.44	cp	BRD-A36074203	remacemide	Glutamate receptor antagonist
5287	-36.14	cp	BRD-A39255369	DCPIB	Chloride channel blocker
5283	-36.06	cp	BRD-K51575138	TPCA-1	IKK inhibitor
5274	-35.95	cp	BRD-K46137903	prednicarbate	Phospholipase activator
5275	-35.95	cp	BRD-A47513740	calyculin	Protein phosphatase inhibitor
5272	-35.93	cp	BRD-K45435259	SCH-23390	Dopamine receptor antagonist
5271	-35.92	cp	BRD-K47869605	podophyllotoxin	Microtubule inhibitor
5263	-35.73	cp	BRD-K52751261	TAK-715	p38 MAPK inhibitor
5261	-35.7	cp	BRD-A70083328	secnidazole	Acetylcholinesterase inhibitor
5259	-35.68	cp	BRD-K00184207	GR-206	Aryl hydrocarbon receptor ligand
5258	-35.66	cp	BRD-K32292990	CGP-53353	EGFR inhibitor
5255	-35.58	cp	BRD-K32821942	azathioprine	Dehydrogenase inhibitor
5249	-35.39	cp	BRD-K73293050	WZ-3146	EGFR inhibitor
5245	-35.31	cp	BRD-A95696066	nisoxetine	Norepinephrine reuptake inhibitor
5242	-35.27	cp	BRD-A50764878	MDL-73005EF	Serotonin receptor antagonist
5230	-35.12	cp	BRD-K85402309	dovitinib	EGFR inhibitor
5223	-35.04	cp	BRD-K41903098	diphenoxylate	Opioid receptor agonist
5221	-34.97	cp	BRD-K86727142	embelin	HCV inhibitor
5222	-34.97	cp	BRD-A15415227	GW-1929	PPAR receptor agonist
5218	-34.93	cp	BRD-A84174393	meloxicam	Cyclooxygenase inhibitor
5213	-34.88	cp	BRD-A63667919	methylergometrine	Dopamine receptor antagonist
5207	-34.82	cp	BRD-K31987754	oleylethanolamide	Cannabinoid receptor agonist
5199	-34.67	cp	BRD-K31912990	CGP-71683	Neuropeptide receptor antagonist
5196	-34.62	cp	BRD-K52930707	rescinnamine	ACE inhibitor
5194	-34.59	cp	BRD-K61177364	NBI-27914	CRF receptor antagonist
5191	-34.49	cp	BRD-U97083655	teicoplanin	Bacterial cell wall synthesis inhibitor
5189	-34.45	cp	BRD-K30020243	aliskiren	Antihypertensive
5183	-34.37	cp	BRD-K33312228	halometasone	Glucocorticoid receptor agonist
5180	-34.32	cp	BRD-K06335600	tizanidine	Adrenergic receptor agonist
5179	-34.28	cp	BRD-K83988098	alvespimycin	HSP inhibitor
5178	-34.26	cp	BRD-K06147391	telenzepine	Acetylcholine receptor antagonist
5177	-34.24	cp	BRD-A25569250	KI-16425	Lysophosphatidic acid receptor antagonist
5172	-34.15	cp	BRD-K99616396	motesanib	KIT inhibitor
5165	-34.07	cp	BRD-K59753853	MDL-29951	Glutamate receptor antagonist
5163	-34.04	cp	BRD-K98684188	GSK-0660	PPAR receptor antagonist
5159	-33.97	cp	BRD-K46742498	alosetron	Serotonin receptor antagonist
5153	-33.88	cp	BRD-A68589262	troxipide	Glucosamine synthetase stimulant
5145	-33.81	cp	BRD-K09397065	SR-57227A	Serotonin receptor agonist
5144	-33.8	cp	BRD-K57718010	pentylenetetrazol	GABA receptor antagonist
5132	-33.5	cp	BRD-A29289453	PCA-4248	Platelet activating factor receptor antagonist
5131	-33.48	cp	BRD-K47780086	penciclovir	DNA directed DNA polymerase inhibitor
5121	-33.34	cp	BRD-K28761384	zuclopenthixol	Dopamine receptor antagonist
5118	-33.29	cp	BRD-K62056274	quipazine	Serotonin receptor agonist
5112	-33.21	cp	BRD-A64227845	SKF-77434	Dopamine receptor agonist
5110	-33.2	cp	BRD-K39391626	ethylestrenol	Progesterone receptor agonist
5101	-32.98	cp	BRD-K90733503	cefalexin	Bacterial cell wall synthesis inhibitor
5096	-32.91	cp	BRD-K35483542	alitretinoin	Retinoid receptor agonist
5097	-32.91	cp	BRD-A72711497	lasalocid	Bacterial permeability inducer
5094	-32.89	cp	BRD-K38251852	paxilline	Potassium channel blocker
5092	-32.86	cp	BRD-A24817035	laudanosine	Central nervous system agent
5088	-32.78	cp	BRD-K53318339	vinpocetine	Phosphodiesterase inhibitor
5083	-32.65	cp	BRD-K62929068	6-benzylaminopurine	Purinergic receptor activator
5082	-32.62	cp	BRD-K10961822	latanoprost	Prostanoid receptor agonist
5080	-32.6	cp	BRD-K07212038	selinidin	Mast cell stabilizer
5072	-32.54	cp	BRD-A16332958	modafinil	Adrenergic receptor agonist
5066	-32.47	cp	BRD-K71499074	diclofenamide	Carbonic anhydrase inhibitor
5056	-32.39	cp	BRD-K63150726	JTE-907	Cannabinoid receptor inverse agonist
5047	-32.22	cp	BRD-A65597028	RX-821002	Adrenergic receptor antagonist
5046	-32.2	cp	BRD-K61269089	daphnetin	Protein kinase inhibitor
5045	-32.16	cp	BRD-K92723993	imatinib	BCR-ABL kinase inhibitor
5040	-32.11	cp	BRD-A48257147	PHCCC	Glutamate receptor agonist
5041	-32.11	cp	BRD-K63979671	etifenin	Compound used in hepatobiliary scans of the liver
5042	-32.11	cp	BRD-A86044036	flurbiprofen	Cyclooxygenase inhibitor
5038	-32.09	cp	BRD-A17448384	beclometasone	Glucocorticoid receptor agonist
5037	-32.06	cp	BRD-K49890030	gavestinel	Glutamate receptor antagonist
5033	-31.97	cp	BRD-K54665485	R-59022	Diacylglycerol kinase inhibitor
5029	-31.92	cp	BRD-A44780397	mifepristone	Glucocorticoid receptor antagonist
5030	-31.92	cp	BRD-A66563878	medetomidine	Adrenergic receptor agonist
5025	-31.88	cp	BRD-K36009368	NNC-63-0532	Opioid receptor agonist
5014	-31.73	cp	BRD-K67680372	CI-966	GAT inhibitor
5006	-31.67	cp	BRD-K95676198	JAK3-inhibitor-V	JAK inhibitor
5001	-31.53	cp	BRD-K11717138	benzbromarone	Chloride channel blocker
4995	-31.49	cp	BRD-K95763993	trapidil	PDGFR receptor inhibitor
4994	-31.48	cp	BRD-K79602928	metformin	Insulin sensitizer
4990	-31.45	cp	BRD-K73978287	hydrocortisone	Glucocorticoid receptor agonist
4984	-31.32	cp	BRD-K22193694	dioxybenzone	Topical sunscreen agent
4982	-31.3	cp	BRD-K29673530	hypericin	Tyrosine kinase inhibitor
4978	-31.21	cp	BRD-K94689771	pinocembrin	CYP1B1 inhibitor
4977	-31.19	cp	BRD-A88282067	delcorine	Antiarrhythmic
4963	-30.99	cp	BRD-A38747044	KU-14R	Imidazoline receptor ligand
4964	-30.99	cp	BRD-K33453211	levocabastine	Histamine receptor antagonist
4962	-30.98	cp	BRD-K95739795	tetrabenazine	Vesicular monoamine transporter inhibitor
4955	-30.89	cp	BRD-A81866333	CGS-21680	Adenosine receptor agonist
4953	-30.87	cp	BRD-A26097136	bulleyaconitine-a	Non-opiod analgesic
4945	-30.75	cp	BRD-A65615053	zacopride	Serotonin receptor antagonist
4941	-30.68	cp	BRD-K68103045	CGS-20625	Benzodiazepine receptor agonist
4940	-30.67	cp	BRD-K17674993	diflorasone	Corticosteroid agonist
4934	-30.56	cp	BRD-K23204545	busulfan	DNA inhibitor
4932	-30.53	cp	BRD-K44899736	RO-16-6941	Monoamine oxidase inhibitor
4919	-30.36	cp	BRD-K83023055	GR-135531	Melatonin receptor agonist
4916	-30.34	cp	BRD-K52735702	cefdinir	Bacterial cell wall synthesis inhibitor
4910	-30.21	cp	BRD-K41160163	fenobam	Glutamate receptor antagonist
4907	-30.11	cp	BRD-K82164249	andarine	Androgen receptor modulator
4903	-30.08	cp	BRD-K14282469	LY-165163	Serotonin receptor antagonist
4905	-30.08	cp	BRD-K05673000	dicloxacillin	Bacterial cell wall synthesis inhibitor
4901	-30.07	cp	BRD-A62525898	prednisone	Glucocorticoid receptor agonist
4900	-30.05	cp	BRD-K10670311	sulfasalazine	Antirheumatic
4894	-29.99	cp	BRD-K28075147	biochanin-a	Estrogen receptor agonist
4892	-29.98	cp	BRD-K29733039	deforolimus	MTOR inhibitor
4890	-29.96	cp	BRD-K34820100	tebuthiuron	Photosynthesis inhibitor
4886	-29.92	cp	BRD-K36616567	doxepin	Histamine receptor antagonist
4883	-29.85	cp	BRD-U88459701	atorvastatin	HMGCR inhibitor
4875	-29.75	cp	BRD-K69600043	thiethylperazine	Dopamine receptor antagonist
4870	-29.67	cp	BRD-K16195444	oxymetazoline	Adrenergic receptor agonist
4869	-29.65	cp	BRD-K56403959	ZK-756326	CC chemokine receptor ligand
4868	-29.63	cp	BRD-A53131506	epitestosterone	Inactive testosterone analog
4865	-29.55	cp	BRD-K41567364	SB-334867	Orexin receptor antagonist
4858	-29.39	cp	BRD-K33572481	taurodeoxycholic-acid	Bile acid
4859	-29.39	cp	BRD-K36377456	marmesin	Angiogenesis inhibitor
4855	-29.35	cp	BRD-K13642330	cosmosiin	Cytochrome P450 inhibitor
4854	-29.34	cp	BRD-A75368507	demeclocycline	Bacterial 30S ribosomal subunit inhibitor
4850	-29.3	cp	BRD-K60690191	MPEP	Glutamate receptor antagonist
4851	-29.3	cp	BRD-K10843433	phenylbutazone	Cyclooxygenase inhibitor
4849	-29.19	cp	BRD-A29734509	disopyramide	Sodium channel blocker
4833	-28.88	cp	BRD-K25186396	tangeritin	Cell cycle inhibitor
4832	-28.86	cp	BRD-K93880783	stavudine	DNA directed DNA polymerase inhibitor
4826	-28.81	cp	BRD-K12120659	GR-144053	Integrin antagonist
4825	-28.8	cp	BRD-K11540476	EMF-BCA1-64	Caspase inhibitor
4824	-28.79	cp	BRD-A87387433	cefpodoxime	Bacterial cell wall synthesis inhibitor
4823	-28.74	cp	BRD-K31633810	DAU-5884	Acetylcholine receptor antagonist
4820	-28.64	cp	BRD-K18619710	digoxigenin	Steroid
4818	-28.59	cp	BRD-K14765469	vesamicol	Acetylcholinesterase inhibitor
4817	-28.57	cp	BRD-K78633253	EXO-1	ARF inhibitor
4809	-28.42	cp	BRD-A22844106	tenoxicam	Cyclooxygenase inhibitor
4810	-28.42	cp	BRD-K96084870	DMBI	PDGFR receptor inhibitor
4800	-28.33	cp	BRD-K94919853	10H-phenothiazin-10-yl)(p-tolyl)methanone	Butyrylcholinesterase inhibitor
4795	-28.23	cp	BRD-K02283807	GR-32191	Thromboxane receptor antagonist
4793	-28.19	cp	BRD-K98530306	clonidine	Adrenergic receptor agonist
4790	-28.13	cp	BRD-K14888893	minoxidil	KATP activator
4785	-28.09	cp	BRD-A22684332	procaterol	Adrenergic receptor agonist
4783	-28.08	cp	BRD-K67537649	PQ-401	IGF-1 inhibitor
4782	-28.07	cp	BRD-K51671335	sulpiride	Dopamine receptor antagonist
4780	-28.04	cp	BRD-K11163873	phenanthridone	PARP inhibitor
4775	-27.99	cp	BRD-A31575449	CGP-20712	Adrenergic receptor antagonist
4768	-27.82	cp	BRD-K92000912	AM-251	Cannabinoid receptor antagonist
4763	-27.77	cp	BRD-A20126139	medrysone	Glucocorticoid receptor agonist
4764	-27.77	cp	BRD-K62200014	anagrelide	Phosphodiesterase inhibitor
4754	-27.65	cp	BRD-K11696279	BU-239	Imidazoline receptor agonist
4751	-27.61	cp	BRD-K41410256	balsalazide	Cyclooxygenase inhibitor
4750	-27.6	cp	BRD-K29173907	isoflupredone	Glucocorticoid receptor agonist
4749	-27.59	cp	BRD-K57222227	indometacin	Cyclooxygenase inhibitor
4747	-27.5	cp	BRD-K69837166	trap-101	Nociceptin/orphanin FQ (NOP) receptor antagonist
4743	-27.46	cp	BRD-K33193182	methylnorlichexanthone	Aurora kinase inhibitor
4735	-27.3	cp	BRD-A16934955	nalbuphine	Opioid receptor agonist
4733	-27.25	cp	BRD-A53077924	tianeptine	Selective serotonin reuptake enhancer (SSRE)
4726	-27.19	cp	BRD-K25875056	SC-9	Protein tyrosine kinase activator
4724	-27.12	cp	BRD-A39172021	ampiroxicam	Cyclooxygenase inhibitor
4721	-27.01	cp	BRD-K68407802	KIN001-055	EGFR inhibitor
4717	-26.96	cp	BRD-K13800121	parecoxib	Cyclooxygenase inhibitor
4711	-26.82	cp	BRD-K63504947	semaxanib	VEGFR inhibitor
4712	-26.82	cp	BRD-K32645441	dipropyl-5ct	Serotonin receptor agonist
4709	-26.81	cp	BRD-A33168282	sotalol	Adrenergic receptor antagonist
4710	-26.81	cp	BRD-K13544237	r(-)-propylnorapomorphine	Dopamine receptor agonist
4708	-26.8	cp	BRD-K77695569	tiabendazole	Angiogenesis inhibitor
4707	-26.75	cp	BRD-K52172416	anastrozole	Aromatase inhibitor
4706	-26.72	cp	BRD-K59597909	phenothiazine	Dopamine receptor antagonist
4702	-26.65	cp	BRD-K90976994	dehydrocholic-acid	Bile acid
4701	-26.64	cp	BRD-K26429091	J-104129	Acetylcholine receptor antagonist
4699	-26.6	cp	BRD-K85242180	beta-CCP	Indoleamine 2,3-dioxygenase inhibitor
4696	-26.57	cp	BRD-K39670393	amthamine	Histamine receptor agonist
4697	-26.57	cp	BRD-A70514680	articaine	Local anesthetic
4694	-26.54	cp	BRD-K21733600	rofecoxib	Cyclooxygenase inhibitor
4692	-26.48	cp	BRD-K05350981	oligomycin-c	ATPase inhibitor
4687	-26.42	cp	BRD-K83322645	L-693403	Sigma receptor agonist
4688	-26.42	cp	BRD-K78294846	osthol	Calcium channel blocker
4676	-26.26	cp	BRD-K41707108	ceramide	Phosphoenolpyruvate carboxylase activator
4673	-26.24	cp	BRD-A14208071	oxyphenonium	Cholinergic receptor antagonist
4672	-26.21	cp	BRD-A65013509	oxybutynin	Acetylcholine receptor antagonist
4667	-26.15	cp	BRD-K81855038	roxatidine	Histamine receptor antagonist
4659	-26.06	cp	BRD-K08502430	angiogenesis-inhibitor	Angiogenesis inhibitor
4652	-25.97	cp	BRD-K85871428	SC-68376	p38 MAPK inhibitor
4651	-25.96	cp	BRD-K13169950	NSC-3852	HDAC inhibitor
4649	-25.95	cp	BRD-K94270326	ecopipam	Dopamine receptor antagonist
4647	-25.91	cp	BRD-K71860425	CDK2-5-inhibitor	CDK inhibitor
4644	-25.86	cp	BRD-K96319534	phentermine	Dopamine uptake inhibitor
4642	-25.85	cp	BRD-K93460210	lamotrigine	Serotonin receptor antagonist
4640	-25.82	cp	BRD-K47717570	NBQX	Glutamate receptor antagonist
4637	-25.79	cp	BRD-A49906757	scopolamine	Acetylcholine receptor antagonist
4631	-25.67	cp	BRD-A41833852	naloxone	Opioid receptor antagonist
4629	-25.65	cp	BRD-A62021152	WAY-161503	Serotonin receptor agonist
4627	-25.64	cp	BRD-K65285700	BRD-K65285700	Cannabinoid receptor agonist
4621	-25.51	cp	BRD-A96882008	L-732138	Tachykinin antagonist
4620	-25.5	cp	BRD-K91442916	CAM-9-026	Membrane metalloendopeptidase inhibitor
4612	-25.36	cp	BRD-A54490543	pirlindole	Monoamine oxidase inhibitor
4608	-25.28	cp	BRD-A15034104	bergenin	Interleukin inhibitor
4607	-25.27	cp	BRD-K70505054	ranitidine	Histamine receptor antagonist
4605	-25.23	cp	BRD-K82731415	olomoucine	CDK inhibitor
4603	-25.22	cp	BRD-K30480208	torasemide	Electrolyte reabsorption inhibitor
4602	-25.2	cp	BRD-K35458079	edaravone	Nootropic agent
4595	-24.98	cp	BRD-K28806945	L-750667	Dopamine receptor antagonist
4591	-24.95	cp	BRD-A01643550	prednisolone	Glucocorticoid receptor agonist
4580	-24.86	cp	BRD-K70330367	amantadine	Glutamate receptor antagonist
4575	-24.82	cp	BRD-A20968261	WAY-213613	Glutamate inhibitor
4573	-24.78	cp	BRD-K37194137	III606050	Cytochrome P450 inhibitor
4571	-24.66	cp	BRD-A81402010	KU-C103443N	CDC inhibitor
4569	-24.63	cp	BRD-K52394958	GR-159897	Tachykinin antagonist
4565	-24.6	cp	BRD-K08619574	thioproperazine	Dopamine receptor antagonist
4561	-24.56	cp	BRD-K70778732	trazodone	Adrenergic receptor antagonist
4559	-24.51	cp	BRD-K54314721	zolmitriptan	Serotonin receptor agonist
4557	-24.49	cp	BRD-K78280988	anandamide	Cannabinoid receptor agonist
4556	-24.47	cp	BRD-K86600316	RS-79948	Adrenergic receptor antagonist
4554	-24.42	cp	BRD-K76810206	nicergoline	Adrenergic receptor antagonist
4551	-24.37	cp	BRD-K22385716	LY-303511	Casein kinase inhibitor
4549	-24.27	cp	BRD-K94841585	emodic-acid	Laxative
4548	-24.26	cp	BRD-K73397362	purmorphamine	Smoothened receptor agonist
4547	-24.25	cp	BRD-K01095011	finasteride	5-alpha reductase inhibitor
4543	-24.16	cp	BRD-A25143711	hydrocortisone	Glucocorticoid receptor agonist
4541	-24.15	cp	BRD-K18757346	U-46619	Thromboxane receptor agonist
4535	-24.09	cp	BRD-K30867024	SB-216641	Serotonin receptor antagonist
4536	-24.09	cp	BRD-A26095496	clobetasol	Glucocorticoid receptor agonist
4529	-24.05	cp	BRD-A25067867	benzatropine	Acetylcholine receptor antagonist
4515	-23.87	cp	BRD-K59332007	linopirdine	Potassium channel blocker
4511	-23.8	cp	BRD-K60460488	nelfinavir	HIV protease inhibitor
4512	-23.8	cp	BRD-K45068323	W-13	Calmodulin antagonist
4486	-23.35	cp	BRD-K40213712	SAL-1	Adenosine receptor antagonist
4487	-23.35	cp	BRD-K23913458	coumarin	Vitamin K antagonist
4482	-23.28	cp	BRD-K82381502	acetylcholine	Acetylcholine receptor agonist
4480	-23.26	cp	BRD-K76534306	enrofloxacin	Bacterial DNA gyrase inhibitor
4475	-23.1	cp	BRD-K66707493	lawsone	Coloring agent
4470	-23.03	cp	BRD-K89274813	DMP-543	Acetylcholine release stimulant
4464	-22.91	cp	BRD-K71534238	GW-9508	Free fatty acid receptor agonist
4460	-22.81	cp	BRD-K95921201	reserpine	Vesicular monoamine transporter inhibitor
4456	-22.72	cp	BRD-K32501161	vanoxerine	Dopamine uptake inhibitor
4454	-22.71	cp	BRD-A51182606	chloramphenicol	Protein synthesis inhibitor
4452	-22.69	cp	BRD-K70301876	escitalopram	Selective serotonin reuptake inhibitor (SSRI)
4451	-22.67	cp	BRD-K83010055	VU-0415374-1	Glutamate receptor modulator
4450	-22.62	cp	BRD-K20655524	mefexamide	Psychoactive drug
4449	-22.61	cp	BRD-A64977602	mirtazapine	Adrenergic receptor antagonist
4447	-22.56	cp	BRD-K90027355	spironolactone	Mineralocorticoid receptor antagonist
4442	-22.43	cp	BRD-K80725632	lavendustin-c	EGFR inhibitor
4441	-22.38	cp	BRD-A18763547	BAX-channel-blocker	Cytochrome C release inhibitor
4437	-22.3	cp	BRD-K31553034	zibotentan	Endothelin receptor antagonist
4433	-22.25	cp	BRD-K45158365	valsartan	Angiotensin receptor antagonist
4424	-22.13	cp	BRD-K66782112	BRD-K66782112	Histamine receptor antagonist
4415	-21.97	cp	BRD-K05906022	limonin	HIV protease inhibitor
4414	-21.93	cp	BRD-K48722833	iloperidone	Dopamine receptor antagonist
4402	-21.78	cp	BRD-K62996583	lidoflazine	Calcium channel blocker
4397	-21.73	cp	BRD-K64610608	EMF-bca1-57	caspase inhibitor
4394	-21.7	cp	BRD-A90311807	cilastatin	Dehydropeptidase inhibitor
4387	-21.58	cp	BRD-A41941932	vitexin	Antioxidant
4384	-21.53	cp	BRD-K20995441	U-54494A	Opioid receptor agonist
4381	-21.52	cp	BRD-K81876028	CP-93129	Serotonin receptor agonist
4383	-21.52	cp	BRD-K86509404	iso-olomoucine	CDK inhibitor
4380	-21.46	cp	BRD-K34776109	glimepiride	Insulin secretagogue
4374	-21.27	cp	BRD-K36862742	hydroflumethiazide	Sodium/potassium/chloride transporter inhibitor
4373	-21.26	cp	BRD-K56064827	EI-273	PKC inhibitor
4369	-21.21	cp	BRD-K69556541	ryanodine	Calcium channel blocker
4368	-21.16	cp	BRD-A09828896	SKF-81297	Dopamine receptor agonist
4365	-21.06	cp	BRD-K05104363	PD-184352	MEK inhibitor
4351	-20.78	cp	BRD-A97730597	hexylcaine	Sodium channel blocker
4349	-20.75	cp	BRD-K76133116	benzydamine	Membrane integrity inhibitor
4342	-20.59	cp	BRD-K48029790	OBAA	Phospholipase inhibitor
4327	-20.32	cp	BRD-A31195449	TCB2	Serotonin receptor agonist
4328	-20.32	cp	BRD-K54142781	cirazoline	Adrenergic receptor agonist
4324	-20.29	cp	BRD-K51541829	RO-25-6981	Ionotropic glutamate receptor antagonist
4322	-20.25	cp	BRD-K60160658	tiagabine	GABA uptake inhibitor
4321	-20.24	cp	BRD-A27887842	prednisolone	Glucocorticoid receptor agonist
4316	-20.11	cp	BRD-A78942461	ICI-118551	Adrenergic receptor antagonist
4301	-19.87	cp	BRD-A95869247	indapamide	Thiazide diuretic
4300	-19.84	cp	BRD-K60184833	tyrphostin-46	Tyrosine kinase inhibitor
4299	-19.77	cp	BRD-A49046702	SKF-89976A	GABA uptake inhibitor
4297	-19.76	cp	BRD-K43880410	pregnenolone	glutamate receptor modulator
4293	-19.71	cp	BRD-A70268693	PG-9	Acetylcholine receptor agonist
4294	-19.71	cp	BRD-K95885906	quercetagetin	PIM inhibitor
4292	-19.69	cp	BRD-A93424738	dexamethasone	Glucocorticoid receptor agonist
4291	-19.67	cp	BRD-K32696739	noreleagnine	Monoamine oxidase inhibitor
4290	-19.61	cp	BRD-A02759312	betaxolol	Adrenergic receptor antagonist
4288	-19.59	cp	BRD-K94379058	BML-190	Cannabinoid receptor inverse agonist
4284	-19.46	cp	BRD-K99107520	felbamate	Glutamate receptor antagonist
4281	-19.41	cp	BRD-K36627727	tamibarotene	Retinoid receptor agonist
4280	-19.38	cp	BRD-A09056319	alfuzosin	Adrenergic receptor antagonist
4272	-19.2	cp	BRD-K27184429	levocetirizine	Histamine receptor antagonist
4269	-19.17	cp	BRD-K17008822	BD-1008	Sigma receptor antagonist
4265	-19.15	cp	BRD-K66956375	oleoylethanolamide	Cannabinoid receptor agonist
4266	-19.15	cp	BRD-K56509348	BMS-182874	Endothelin receptor antagonist
4262	-19.1	cp	BRD-A61793559	metolazone	Carbonic anhydrase inhibitor
4258	-19.03	cp	BRD-K14536225	piceid	Glucosidase inhibitor
4253	-18.94	cp	BRD-K60060639	methyllidocaine	antiarrhythmic medication
4248	-18.79	cp	BRD-A41450521	tosufloxacin	Bacterial DNA gyrase inhibitor
4244	-18.68	cp	BRD-K12513978	fenbufen	Cyclooxygenase inhibitor
4245	-18.68	cp	BRD-K00234327	RU-24969	Serotonin receptor agonist
4243	-18.67	cp	BRD-K29905972	axitinib	PDGFR receptor inhibitor
4240	-18.61	cp	BRD-K44094599	tacrolimus	Calcineurin inhibitor
4237	-18.57	cp	BRD-K39339537	epirizole	Cyclooxygenase inhibitor
4231	-18.49	cp	BRD-K16277217	piperacetazine	Dopamine receptor antagonist
4226	-18.41	cp	BRD-A25004090	erastin	Ion channel antagonist
4218	-18.26	cp	BRD-K76304753	phenazopyridine	Local anesthetic
4210	-18.19	cp	BRD-K82357231	desloratadine	Histamine receptor antagonist
4211	-18.19	cp	BRD-A42831637	tetrahydrocannabinol-7-oic-acid	Anti-inflammatory
4207	-18.16	cp	BRD-K78838262	austricine	Hypolipidemic
4197	-17.91	cp	BRD-A16754160	ampicillin	Bacterial cell wall synthesis inhibitor
4194	-17.88	cp	BRD-A87479750	tenidap	Cyclooxygenase inhibitor
4191	-17.85	cp	BRD-A45140972	meclocycline	Bacterial 30S ribosomal subunit inhibitor
4189	-17.69	cp	BRD-K08640512	RS-100329	Adrenergic receptor antagonist
4187	-17.62	cp	BRD-K01648091	LE-300	Dopamine receptor antagonist
4184	-17.53	cp	BRD-K69688083	mestinon	Cholinesterase inhibitor
4183	-17.51	cp	BRD-K75641298	metoclopramide	Dopamine receptor antagonist
4182	-17.5	cp	BRD-K36153907	KU-C103885	Cystic fibrosis transmembrane conductance regulator inhibitor
4181	-17.47	cp	BRD-A48720949	testosterone	androgen receptor agonist
4176	-17.39	cp	BRD-A58157837	butabindide	Tripeptidyl peptidase inhibitor
4175	-17.33	cp	BRD-A14395271	mesoridazine	Dopamine receptor antagonist
4167	-17.02	cp	BRD-K98493452	honokiol	AKT inhibitor
4160	-16.98	cp	BRD-A66199457	asiaticoside	Antineoplastic
4162	-16.98	cp	BRD-A58048407	nimodipine	Calcium channel blocker
4159	-16.95	cp	BRD-A71203467	l-stepholidine	Dopamine receptor antagonist
4156	-16.83	cp	BRD-K33308633	INCA-6	Calcineurin inhibitor
4152	-16.74	cp	BRD-K96144918	mead-acid	KPL-1 tumor suppressor
4146	-16.68	cp	BRD-K39944607	ochratoxin-a	Phenylalanyl tRNA synthetase inhibitor
4142	-16.59	cp	BRD-K98157055	SIB-1757	Glutamate receptor antagonist
4137	-16.5	cp	BRD-K10870738	CDC	Lipoxygenase inhibitor
4135	-16.49	cp	BRD-K23369905	oxiconazole	Bacterial cell wall synthesis inhibitor
4133	-16.44	cp	BRD-A85280935	quinpirole	Dopamine receptor agonist
4130	-16.42	cp	BRD-K54987996	CAY-10578	Casein kinase inhibitor
4126	-16.37	cp	BRD-K68437527	EMF-bca1-60	caspase inhibitor
4121	-16.21	cp	BRD-K75478907	GS-39783	GABA receptor modulator
4120	-16.15	cp	BRD-K59256312	gabexate	Serine protease inhibitor
4111	-16.08	cp	BRD-K88677950	PD-198306	MAP kinase inhibitor
4110	-16.07	cp	BRD-A02189320	met-leu-phe	-666
4103	-15.99	cp	BRD-K28849549	mesalazine	Cyclooxygenase inhibitor
4099	-15.9	cp	BRD-A98702003	carbenoxolone	11-beta-HSD1 inhibitor
4098	-15.89	cp	BRD-A51382177	fosinopril	ACE inhibitor
4097	-15.87	cp	BRD-K80672993	M2-PK-activator	-666
4096	-15.86	cp	BRD-K72034655	peucedanin	Apoptosis stimulant
4092	-15.78	cp	BRD-K31471398	dihydrexidine	Dopamine receptor agonist
4091	-15.75	cp	BRD-K09635314	M-3M3FBS	phospholipase activator
4089	-15.72	cp	BRD-A37817666	picrotoxin	GABA receptor antagonist
4083	-15.5	cp	BRD-K77677632	SB-200646	Serotonin receptor antagonist
4084	-15.5	cp	BRD-A10969569	ambelline	Plant alkaloid
4082	-15.47	cp	BRD-K38477985	malonoben	Protein tyrosine kinase inhibitor
4081	-15.45	cp	BRD-A02176148	tubaic-acid	Mitochondrial complex I inhibitor
4080	-15.42	cp	BRD-A13084692	troglitazone	Insulin sensitizer
4078	-15.4	cp	BRD-K17110974	aristolochic-acid	Phospholipase inhibitor
4077	-15.38	cp	BRD-K30197592	5-methoxytryptamine	Serotonin receptor agonist
4076	-15.37	cp	BRD-A94669766	naringenin	Aromatase inhibitor
4069	-15.29	cp	BRD-K47323024	methapyrilene	Histamine receptor antagonist
4066	-15.27	cp	BRD-K91699951	benzonatate	Local anesthetic
4063	-15.22	cp	BRD-K38449220	seneciphylline	Cytochrome P450 inhibitor
4062	-15.16	cp	BRD-A68281735	REV-5901	Leukotriene receptor antagonist
4061	-15.14	cp	BRD-K83144676	olmesartan	Angiotensin antagonist
4056	-15.01	cp	BRD-K65417056	meprylcaine	Local anesthetic
4050	-14.93	cp	BRD-K51223576	AG-99	Tyrosine kinase inhibitor
4048	-14.86	cp	BRD-A07765530	epinephrine	carbonic anhydrase activator
4045	-14.76	cp	BRD-K26801045	pipamperone	Dopamine receptor antagonist
4040	-14.63	cp	BRD-A08877921	cephalotaxine	Protein synthesis inhibitor
4035	-14.58	cp	BRD-K00312224	PPT	Estrogen receptor agonist
4033	-14.45	cp	BRD-K99029477	prometon	Photosynthesis inhibitor
4031	-14.43	cp	BRD-A64125466	dehydrocholic-acid	choleretic agent
4028	-14.39	cp	BRD-A26845397	isamoltan	Adrenergic receptor antagonist
4026	-14.32	cp	BRD-A05352148	ipratropium	Acetylcholine receptor antagonist
4023	-14.26	cp	BRD-K40902647	vincamine	Adrenergic receptor antagonist
4020	-14.21	cp	BRD-A84389091	L-655708	GABA receptor inverse agonist
4019	-14.19	cp	BRD-K53857191	risperidone	Dopamine receptor antagonist
4016	-14.14	cp	BRD-K00532621	midazolam	Benzodiazepine receptor agonist
4015	-14.13	cp	BRD-A56012032	thiorphan	Membrane metalloendopeptidase inhibitor
4014	-14.05	cp	BRD-A67799922	phenoxybenzamine	Adrenergic receptor antagonist
4011	-14.02	cp	BRD-K63550407	erythromycin	NFkB pathway inhibitor
4000	-13.88	cp	BRD-K40919711	BAPTA-AM	Potassium channel blocker
3993	-13.79	cp	BRD-K02265150	amoxapine	Norepinephrine reuptake inhibitor
3985	-13.64	cp	BRD-K52721684	PCO-400	Potassium channel activator
3984	-13.62	cp	BRD-K63913457	eicosatrienoic-acid	Vasodilator
3981	-13.55	cp	BRD-A76093993	cromakalim	Potassium channel activator
3979	-13.52	cp	BRD-K28346421	rifapentine	RNA polymerase inhibitor
3977	-13.49	cp	BRD-K06221026	DUP-697	Cyclooxygenase inhibitor
3974	-13.4	cp	BRD-A91008255	bepridil	Calcium channel blocker
3971	-13.38	cp	BRD-K06712146	YM-90709	IL5 inhibitor
3970	-13.35	cp	BRD-A63546914	RO-04-5595	Glutamate receptor antagonist
3969	-13.32	cp	BRD-A98299281	velnacrine	cholinesterase inhibitor
3960	-13.05	cp	BRD-K12932420	YM-976	Phosphodiesterase inhibitor
3959	-13.03	cp	BRD-K47631482	bromhexine	Mucolytic agent
3953	-12.93	cp	BRD-K76568384	PHTPP	Estrogen receptor antagonist
3952	-12.9	cp	BRD-K67783091	haloperidol	Dopamine receptor antagonist
3936	-12.59	cp	BRD-K95202259	ML-3163	p38 MAPK inhibitor
3932	-12.56	cp	BRD-K28307902	flutamide	Androgen receptor antagonist
3931	-12.55	cp	BRD-K64245000	GW-4064	FXR agonist
3928	-12.47	cp	BRD-K80325895	eicosadienoic-acid	-666
3920	-12.21	cp	BRD-K26160755	RS-45041-190	Imidazoline receptor agonist
3919	-12.19	cp	BRD-K89125793	tinidazole	Antiprotozoal
3918	-12.11	cp	BRD-K11399644	phenformin	AMPK activator
3916	-12.04	cp	BRD-A72066420	mifobate	PPAR receptor antagonist
3914	-11.97	cp	BRD-A29485665	bicalutamide	Androgen receptor antagonist
3909	-11.87	cp	BRD-K16406336	methylene-blue	Guanylyl cyclase inhibitor
3910	-11.87	cp	BRD-K92760278	riboflavin	Vitamin B
3907	-11.8	cp	BRD-K88871508	lisuride	Dopamine receptor agonist
3903	-11.66	cp	BRD-A46179541	doxapram	Potassium channel blocker
3902	-11.65	cp	BRD-A41692738	TGX-221	PI3K inhibitor
3901	-11.63	cp	BRD-A30590053	MR-16728	Acetylcholine release enhancer
3898	-11.56	cp	BRD-A75517195	thiazolopyrimidine	CDC inhibitor
3897	-11.47	cp	BRD-K89402695	L-655240	Thromboxane receptor antagonist
3896	-11.45	cp	BRD-A99833829	bethanechol	Acetylcholine receptor agonist
3892	-11.37	cp	BRD-K06467078	corynanthine	Adrenergic receptor antagonist
3891	-11.27	cp	BRD-A11135865	nor-binaltorphimine	Opioid receptor antagonist
3890	-11.26	cp	BRD-K76274772	MAPP-D-erythro	Ceramidase inhibitor
3882	-11.09	cp	BRD-K71003802	hippeastrine	Plant alkaloid
3880	-10.94	cp	BRD-K02950022	BMS-299897	Gamma secretase inhibitor
3877	-10.81	cp	BRD-K45117373	Y-26763	Potassium channel activator
3876	-10.79	cp	BRD-A92177080	betamethasone	Glucocorticoid receptor agonist
3874	-10.78	cp	BRD-K17378184	prestwick-559	Dopamine receptor agonist
3869	-10.61	cp	BRD-K95851186	CGP-13501	GABA receptor modulator
3868	-10.57	cp	BRD-K18036262	L-168049	Glucagon receptor antagonist
3863	-10.45	cp	BRD-A00520476	otenzepad	Acetylcholine receptor antagonist
3864	-10.45	cp	BRD-K43405658	tyrphostin-AG-527	Protein tyrosine kinase inhibitor
3858	-10.07	cp	BRD-A65550283	ginsenoside	Steroid hormone receptor agonist
3855	-10.01	cp	BRD-K75615183	talipexole	Adrenergic receptor agonist
3840	-9.4	cp	BRD-K54759182	dosulepin	Norepinephrine reuptake inhibitor
3839	-9.39	cp	BRD-K22662435	ganciclovir	DNA polymerase inhibitor
3838	-9.26	cp	BRD-K82983861	GW-0742	PPAR receptor agonist
3834	-9.12	cp	BRD-K45401373	betulinic-acid	Apoptosis stimulant
3833	-9.11	cp	BRD-A35033682	eriodictyol	Cytochrome P450 inhibitor
3831	-9.08	cp	BRD-K55034111	pefloxacin	Bacterial DNA gyrase inhibitor
3824	-8.81	cp	BRD-K51662849	ilomastat	Matrix metalloprotease inhibitor
3820	-8.63	cp	BRD-K48869804	icilin	TRPV agonist
3815	-8.57	cp	BRD-A77291778	cyclopentolate	Acetylcholine receptor antagonist
3811	-8.46	cp	BRD-A36066264	estradiol-benzoate	Estrogen receptor agonist
3810	-8.38	cp	BRD-K02113016	olaparib	PARP inhibitor
3806	-8.31	cp	BRD-K69690935	curcumin	Cyclooxygenase inhibitor
3805	-8.23	cp	BRD-K49448285	bisindolylmaleimide	CDK inhibitor
3804	-8.2	cp	BRD-A51410489	yohimbine	Adrenergic receptor antagonist
3800	-7.99	cp	BRD-K34608650	BRD-K34608650	Cannabinoid receptor agonist
3786	-7.23	cp	BRD-K42095107	daidzein	Estrogen receptor agonist
3784	-7.15	cp	BRD-K79254416	decitabine	DNA methyltransferase inhibitor
3782	-7.04	cp	BRD-K21936341	oxotremorine	Acetylcholine receptor agonist
3781	-6.87	cp	BRD-K34533029	tyrphostin-AG-494	EGFR inhibitor
3778	-6.67	cp	BRD-A14966924	alaproclate	Serotonin receptor antagonist
3777	-6.66	cp	BRD-A92585442	RU-28318	Cytochrome P450 inhibitor
3776	-6.56	cp	BRD-K64451768	GANT-58	GLI antagonist
3775	-6.47	cp	BRD-K47659338	EMD-386088	Serotonin receptor agonist
3769	-6.2	cp	BRD-K06159959	CCMQ	Inhibitor of the binding of homoquinolinic acid to non-NMDA sensitive sites
3768	-5.97	cp	BRD-K54771420	glycocholic-acid	Cholesterol inhibitor
3767	-5.88	cp	BRD-A92630576	trimebutine	Opioid receptor agonist
3764	-5.82	cp	BRD-A84134924	pancuronium	Acetylcholine receptor antagonist
3758	-5.36	cp	BRD-K96720755	relcovaptan	Vasopressin receptor antagonist
3755	-4.47	cp	BRD-A94543220	bifonazole	Sterol demethylase inhibitor
3754	-4.46	cp	BRD-K67831364	ZM-323881	VEGFR inhibitor
3748	-4.18	cp	BRD-K26657438	imiquimod	TLR agonist
3747	-4.16	cp	BRD-K64755930	etazolate	Phosphodiesterase inhibitor
3746	-4.02	cp	BRD-K35941380	methysergide	Serotonin receptor antagonist
3745	-3.66	cp	BRD-A46393198	tetramisole	Immunostimulant
3744	-3.31	cp	BRD-K33459542	ditolylguanidine	Sigma receptor agonist
3742	-2.55	cp	BRD-M72442222	vicriviroc	CC chemokine receptor antagonist
3740	-2.43	cp	BRD-K92015269	GBR-12783	Dopamine uptake inhibitor
3739	-2.36	cp	BRD-K50214219	CS-1657	PARP inhibitor
3738	-2.15	cp	BRD-K40624912	ZM-39923	JAK inhibitor
3737	-1.41	cp	BRD-A16694057	bisphenol-a	PPAR receptor antagonist
3734	1.2	cp	BRD-K70327191	benzoxiquine	Anti-infective
3733	1.67	cp	BRD-K19136521	indirubin	CDK inhibitor
3731	1.89	cp	BRD-A91866971	SQ-29548	Thromboxane receptor antagonist
3730	2.11	cp	BRD-A54845972	dihydroergotamine	Serotonin receptor agonist
3727	3.28	cp	BRD-K09497549	kawain	Calcium channel modulator
3726	3.31	cp	BRD-K03842655	penitrem-a	Potassium channel blocker
3724	3.81	cp	BRD-A24122750	saclofen	GABA receptor antagonist
3722	4.48	cp	BRD-A31801025	formestane	Aromatase inhibitor
3721	4.53	cp	BRD-K39746403	erythromycin	NFkB pathway inhibitor
3720	4.55	cp	BRD-K62959606	sphingosine	Ceramidase inhibitor
3717	4.69	cp	BRD-K49456190	prima-1-met	thioredoxin inhibitor
3711	5.78	cp	BRD-K75532464	FTI-276	Farnesyltransferase inhibitor
3708	6.39	cp	BRD-A59303141	quinethazone	Thiazide diuretic
3706	6.43	cp	BRD-K16444452	ibudilast	Leukotriene receptor antagonist
3702	6.58	cp	BRD-K51476772	ST-638	Tyrosine kinase inhibitor
3700	6.72	cp	BRD-K53263234	CITCO	CAR agonist
3699	6.74	cp	BRD-K83302049	protopine	Histamine receptor antagonist
3695	7.06	cp	BRD-K68190965	GR-46611	Serotonin receptor agonist
3694	7.08	cp	BRD-K35723520	darinaparsin	Apoptosis stimulant
3693	7.15	cp	BRD-K02590140	O-2050	Cannabinoid receptor antagonist
3690	7.56	cp	BRD-K97354755	SU-6656	SRC inhibitor
3687	7.91	cp	BRD-K15868788	SDZ-205-557	Serotonin receptor antagonist
3684	8.25	cp	BRD-K04877770	FTase-inhibitor-B581	Farnesyltransferase inhibitor
3683	8.26	cp	BRD-A37347161	BRL-52537	Opioid receptor agonist
3680	8.33	cp	BRD-K99922388	DPO-1	Potassium channel blocker
3677	8.91	cp	BRD-K95899059	LY-344864	Serotonin receptor agonist
3670	9.17	cp	BRD-K11742128	triprolidine	Histamine receptor antagonist
3667	9.38	cp	BRD-K86958018	olvanil	TRPV agonist
3666	9.42	cp	BRD-K14696368	9-methyl-5H-6-thia-4,5-diaza-chrysene-6,6-dioxide	NFkB pathway inhibitor
3664	9.48	cp	BRD-K16664969	GTP-14564	FLT3 inhibitor
3665	9.48	cp	BRD-K80315159	DPPE	Histamine receptor antagonist
3662	9.55	cp	BRD-A96107863	nisoldipine	Calcium channel blocker
3660	9.58	cp	BRD-K32247306	primidone	GABA receptor antagonist
3659	9.61	cp	BRD-K77771411	moxonidine	Imidazoline receptor agonist
3654	9.99	cp	BRD-K55468218	spiperone	Dopamine receptor antagonist
3651	10.16	cp	BRD-K68620903	dydrogesterone	Progesterone receptor agonist
3644	10.54	cp	BRD-A33447119	oxfendazole	Anthelmintic
3635	10.75	cp	BRD-K50018155	RS-67506	Serotonin receptor partial agonist
3634	10.76	cp	BRD-A31204924	mitotane	Antineoplastic
3631	10.98	cp	BRD-A64933752	CV-1808	Adenosine receptor agonist
3626	11.23	cp	BRD-K48932581	cetraxate	Mucus protecting agent
3625	11.26	cp	BRD-K02953697	naringin	Cytochrome P450 inhibitor
3624	11.28	cp	BRD-A23683907	NAS-181	Serotonin receptor antagonist
3623	11.34	cp	BRD-K91336023	mesulergine	Dopamine receptor agonist
3616	11.66	cp	BRD-A67748489	K3644	Kinesin-like spindle protein inhibitor
3614	11.97	cp	BRD-K46317332	proadifen	Nitric oxide synthase inhibitor
3611	12.09	cp	BRD-K36965586	m-chlorophenylbiguanide	Serotonin receptor agonist
3609	12.27	cp	BRD-K08417745	SID-26681509	Cathepsin inhibitor
3600	12.54	cp	BRD-K92678294	irilin-a	Isoflavone
3599	12.59	cp	BRD-A37776212	ICI-204448	Opioid receptor agonist
3598	12.73	cp	BRD-A98431941	ephedrine	Adrenergic receptor agonist
3596	12.93	cp	BRD-A83695761	chromanol	Potassium channel blocker
3587	13.17	cp	BRD-K73999723	telmisartan	Angiotensin receptor antagonist
3581	13.48	cp	BRD-K91900765	VX-745	p38 MAPK inhibitor
3579	13.5	cp	BRD-K79116891	proxymetacaine	Sodium channel blocker
3580	13.5	cp	BRD-K88789588	letrozole	Aromatase inhibitor
3576	13.51	cp	BRD-K26674531	GR-235	Estrogen receptor agonist
3577	13.51	cp	BRD-K92138166	mammea-a	other antibiotic
3578	13.51	cp	BRD-K97764662	PD-173074	FGFR inhibitor
3573	13.57	cp	BRD-K82823076	RO-15-4513	GABA benzodiazepine site receptor inverse agonist
3572	13.58	cp	BRD-K87142802	veliparib	PARP inhibitor
3571	13.6	cp	BRD-K55454768	TAS-301	Calcium-calmodulin dependent protein kinase inhibitor
3569	13.64	cp	BRD-K47936004	piribedil	Dopamine receptor agonist
3564	13.89	cp	BRD-K16977723	PP-3	EGFR inhibitor
3562	13.92	cp	BRD-K50866992	tropisetron	Serotonin receptor antagonist
3563	13.92	cp	BRD-A55369275	CGP-54626	GABA receptor antagonist
3560	14.14	cp	BRD-K45296539	ZD-7114	Adrenergic receptor agonist
3553	14.31	cp	BRD-K34415467	trimethobenzamide	Histamine receptor antagonist
3551	14.38	cp	BRD-K68132782	terbinafine	Fungal squalene epoxidase inhibitor
3548	14.4	cp	BRD-K79092138	nitrofural	Bacterial DNA inhibitor
3547	14.52	cp	BRD-K59273480	propentofylline	Adenosine reuptake inhibitor
3545	14.63	cp	BRD-K42142750	retrorsine	Antimitotic
3541	14.79	cp	BRD-K16551401	PNU-22394	Serotonin receptor agonist
3540	14.83	cp	BRD-A79903587	tegafur	Thymidylate synthase inhibitor
3536	14.94	cp	BRD-K88759641	EMD-66684	Angiotensin receptor antagonist
3533	14.96	cp	BRD-K18316707	O-1918	Cannabinoid receptor antagonist
3531	15.02	cp	BRD-K88849294	lobaric-acid	Tyrosine phosphatase inhibitor
3528	15.05	cp	BRD-A51829654	BRL-15572	Serotonin receptor antagonist
3526	15.07	cp	BRD-K08132273	tyrphostin	EGFR inhibitor
3524	15.19	cp	BRD-K21853356	RG-14620	EGFR inhibitor
3520	15.26	cp	BRD-A45543382	metrizamide	Radiopaque medium
3518	15.36	cp	BRD-A78295502	hydroquinine	Antiarrhythmic
3516	15.48	cp	BRD-K99595596	salsolinol	Monoamine oxidase inhibitor
3514	15.5	cp	BRD-K06208435	YS-035	Calcium channel blocker
3510	15.67	cp	BRD-K45033733	famciclovir	DNA polymerase inhibitor
3504	15.94	cp	BRD-A90131694	alclometasone	Glucocorticoid receptor agonist
3499	16.1	cp	BRD-A34706053	CGP-12177	Adrenergic receptor agonist
3496	16.13	cp	BRD-K40782193	QX-222	Sodium channel blocker
3492	16.29	cp	BRD-K07220430	cinnarizine	Calcium channel blocker
3487	16.4	cp	BRD-K82688027	RG-13022	PDGFR receptor inhibitor
3486	16.42	cp	BRD-K64994968	progesterone	Progesterone receptor agonist
3485	16.48	cp	BRD-K41445866	alfaxalone	Chloride channel agonist
3483	16.61	cp	BRD-K62206109	VUF-5681	Histamine receptor antagonist
3482	16.65	cp	BRD-A24381660	zeranol	Estrogen receptor agonist
3480	16.71	cp	BRD-K06926592	tretinoin	Retinoid receptor agonist
3474	16.86	cp	BRD-K28453807	nitrocaramiphen	Cholinergic receptor antagonist
3471	16.94	cp	BRD-K76908866	CP-724714	EGFR inhibitor
3472	16.94	cp	BRD-K85603128	resorcinol	Phosphodiesterase inhibitor
3470	16.95	cp	BRD-A02990301	lofexidine	Adrenergic receptor agonist
3466	17.06	cp	BRD-K64670467	JNJ-16259685	Glutamate receptor antagonist
3467	17.06	cp	BRD-K93258693	GW-9662	PPAR receptor antagonist
3463	17.19	cp	BRD-A83431637	resmethrin	Cytochrome P450 inhibitor
3461	17.26	cp	BRD-K53878242	MMPX	Phosphodiesterase inhibitor
3456	17.34	cp	BRD-K75699339	rizatriptan	Serotonin receptor agonist
3447	17.56	cp	BRD-K40758068	efavirenz	HIV protease inhibitor
3444	17.6	cp	BRD-A14798026	mestranol	Estrogen receptor agonist
3438	17.75	cp	BRD-K57179821	crotamiton	Antipruritic
3434	17.77	cp	BRD-K92446736	zatebradine	HCN channel blocker
3435	17.77	cp	BRD-K09631521	thiotepa	Cytochrome P450 inhibitor
3431	17.9	cp	BRD-A10303790	talampicillin	Bacterial cell wall synthesis inhibitor
3430	17.91	cp	BRD-A78391468	prednisolone	Glucocorticoid receptor agonist
3425	18	cp	BRD-K73109821	diazoxide	Potassium channel activator
3421	18.12	cp	BRD-A01593789	chlormadinone	5-alpha reductase inhibitor
3419	18.16	cp	BRD-K01663662	diphenidol	Acetylcholine receptor agonist
3417	18.26	cp	BRD-K81521265	dicyclohexylurea	Epoxide hydolase inhibitor
3415	18.36	cp	BRD-A04756508	norgestimate	Progesterone receptor agonist
3413	18.45	cp	BRD-A26384407	chlortalidone	Carbonic anhydrase inhibitor
3412	18.48	cp	BRD-A93255169	thalidomide	TNF production inhibitor
3410	18.5	cp	BRD-K53570330	carbofuran	Cholinesterase inhibitor
3409	18.59	cp	BRD-K53979406	ALX-5407	Glycine transporter inhibitor
3406	18.66	cp	BRD-K24240364	GYKI-52466	Glutamate receptor antagonist
3405	18.68	cp	BRD-K31792052	pifithrin	Interleukin receptor antagonist
3404	18.7	cp	BRD-K28183345	proguanil	Dihydrofolate reductase inhibitor
3402	18.77	cp	BRD-K11129031	gemfibrozil	Lipoprotein lipase activator
3401	18.81	cp	BRD-K97118047	4,5,6,7-tetrabromobenzotriazole	Casein kinase inhibitor
3397	18.86	cp	BRD-K63945320	dihydrosamidin	Phospholipase inhibitor
3389	19.08	cp	BRD-K85030058	benactyzine	Acetylcholine receptor antagonist
3390	19.08	cp	BRD-K30296925	flavokavain-b	Antineoplastic
3379	19.42	cp	BRD-A06726973	dibutyrylcyclic-gmp	cGMP analog
3377	19.56	cp	BRD-K86204871	terconazole	Sterol demethylase inhibitor
3372	19.83	cp	BRD-K32526544	DCEBIO	Potassium channel activator
3371	19.85	cp	BRD-A24191444	ifenprodil	Adrenergic receptor antagonist
3368	19.9	cp	BRD-K28863208	PNU-282987	Cholinergic receptor agonist
3351	20.4	cp	BRD-A40639672	ketorolac	Cyclooxygenase inhibitor
3334	20.74	cp	BRD-K94649603	taxifolin	Opioid receptor antagonist
3329	20.82	cp	BRD-K71799949	carbamazepine	Carboxamide antiepileptic
3319	21	cp	BRD-A39522003	OMDM-2	FAAH inhibitor
3312	21.16	cp	BRD-A22380646	pantoprazole	ATPase inhibitor
3307	21.29	cp	BRD-A04327189	synephrine	Adrenergic receptor agonist
3305	21.35	cp	BRD-K87049188	fusaric-acid	Dopamine beta hydroxylase inhibitor
3300	21.52	cp	BRD-K13664374	dichloroacetic-acid	Pyruvate dehydrogenase kinase inhibitor
3295	21.67	cp	BRD-A04352665	maraviroc	CC chemokine receptor antagonist
3289	21.87	cp	BRD-K45988865	tetramethylsilane	Internal standard for NMR spectroscopy
3282	22.07	cp	BRD-A01295252	trans-7-hydroxy-pipat	Dopamine receptor ligand
3278	22.12	cp	BRD-K54708045	nTZDpa	PPAR receptor agonist
3279	22.12	cp	BRD-K97509413	coumestrol	Estrogen receptor agonist
3275	22.22	cp	BRD-K99174507	cardiogenol-c	Cardiomyogenesis inducer
3270	22.37	cp	BRD-K85503079	perospirone	Dopamine receptor antagonist
3267	22.39	cp	BRD-K66206289	lobeline	Acetylcholine receptor antagonist
3268	22.39	cp	BRD-K04111260	raclopride	Dopamine receptor antagonist
3266	22.4	cp	BRD-A11605036	thiocolchicoside	GABA receptor antagonist
3263	22.47	cp	BRD-A28422058	L-689560	Glutamate receptor antagonist
3261	22.5	cp	BRD-K68264559	brimonidine	Adrenergic receptor agonist
3259	22.56	cp	BRD-A56359832	zileuton	Leukotriene inhibitor
3257	22.65	cp	BRD-K02581333	protein-tyrosine-phosphatase-inhibitor-IV	Tyrosine phosphatase inhibitor
3256	22.66	cp	BRD-A06352508	SB-218078	CHK inhibitor
3254	22.74	cp	BRD-K51302260	KU-C103871	GSP agonist
3252	22.75	cp	BRD-A73581086	ergometrine	Adrenergic receptor agonist
3250	22.76	cp	BRD-K01493881	apigenin	Casein kinase inhibitor
3251	22.76	cp	BRD-K10016611	pyridine-2-aldoxime	Acetylcholinesterase inhibitor
3245	22.84	cp	BRD-K09471561	levofloxacin	Bacterial DNA gyrase inhibitor
3244	22.9	cp	BRD-K67847053	guanabenz	Adrenergic receptor agonist
3240	22.94	cp	BRD-K18742343	H-8	PKA inhibitor
3238	23.02	cp	BRD-A79314293	cephalosporanic-acid	Bacterial cell wall synthesis inhibitor
3237	23.04	cp	BRD-K32311154	nifekalant	Potassium channel blocker
3235	23.08	cp	BRD-K04430056	7-nitroindazole	nitric oxide synthase inhibitor
3233	23.14	cp	BRD-A09533288	verapamil	Calcium channel blocker
3232	23.15	cp	BRD-K88611939	aniracetam	Glutamate receptor agonist
3231	23.17	cp	BRD-A47494775	dipivefrine	Adrenergic receptor agonist
3228	23.2	cp	BRD-K92817986	BJM-CSC-19	MEK inhibitor
3213	23.66	cp	BRD-K80738081	resveratrol	Cytochrome P450 inhibitor
3209	23.73	cp	BRD-K95609758	BMS-191011	Potassium channel activator
3207	23.78	cp	BRD-A78322124	dobutamine	Adrenergic receptor agonist
3201	23.89	cp	BRD-K71731651	PNU-120596	Acetylcholine receptor agonist
3202	23.89	cp	BRD-K06198550	isorotenone	Mitochondrial complex I inhibitor
3196	24.01	cp	BRD-K97158071	droperidol	Dopamine receptor antagonist
3195	24.02	cp	BRD-A72441487	stiripentol	GABA uptake inhibitor
3192	24.04	cp	BRD-K18855837	varenicline	Acetylcholine receptor agonist
3193	24.04	cp	BRD-K25394294	oxaprozin	Cyclooxygenase inhibitor
3189	24.18	cp	BRD-K81209512	AG-494	EGFR inhibitor
3186	24.21	cp	BRD-K39823328	VU-0366037-2	Glutamate receptor modulator
3185	24.23	cp	BRD-K93918653	quizartinib	FLT3 inhibitor
3182	24.41	cp	BRD-K13211965	L-741742	Dopamine receptor antagonist
3180	24.44	cp	BRD-K33211335	dextromethorphan	Glutamate receptor antagonist
3174	24.58	cp	BRD-A35519318	benidipine	Calcium channel blocker
3170	24.64	cp	BRD-A44133049	azasetron	Serotonin receptor antagonist
3169	24.71	cp	BRD-K36395411	SB-206553	Serotonin receptor antagonist
3167	24.75	cp	BRD-A56892734	esomeprazole	ATPase inhibitor
3166	24.76	cp	BRD-K61192372	capecitabine	DNA synthesis inhibitor
3159	24.99	cp	BRD-K64157027	ZD-2079	Adrenergic receptor agonist
3160	24.99	cp	BRD-A31227688	kynuramine	Aryl hydrocarbon receptor activator
3158	25.09	cp	BRD-K67445247	flurofamide	Urease inhibitor
3150	25.22	cp	BRD-K37080523	isoreserpine	Vesicular monoamine transporter inhibitor
3140	25.44	cp	BRD-K34441861	moexipril	ACE inhibitor
3137	25.56	cp	BRD-A62071884	siguazodan	Phosphodiesterase inhibitor
3132	25.65	cp	BRD-K32610195	androstenedione	Cytochrome P450 inhibitor
3131	25.66	cp	BRD-A95939040	sertaconazole	Sterol demethylase inhibitor
3126	25.74	cp	BRD-A20697603	thiostrepton	FOXM1 inhibitor
3125	25.75	cp	BRD-K72222507	quinapril	ACE inhibitor
3123	25.78	cp	BRD-K16554956	PTB1	AMPK activator
3121	25.8	cp	BRD-K08252256	diclofenac	Cyclooxygenase inhibitor
3117	25.92	cp	BRD-K77171813	proxyfan	Histamine receptor modulator
3118	25.92	cp	BRD-K47679368	bromfenac	Cyclooxygenase inhibitor
3115	25.96	cp	BRD-A49172652	lansoprazole	ATPase inhibitor
3111	26.13	cp	BRD-A41995253	brucine	Glycine receptor antagonist
3109	26.14	cp	BRD-A16444946	acarbose	Glucosidase inhibitor
3110	26.14	cp	BRD-K49671696	ketanserin	Serotonin receptor antagonist
3107	26.18	cp	BRD-K63430059	methoxsalen	DNA synthesis inhibitor
3102	26.23	cp	BRD-K32795028	1-benzylimidazole	Thromboxane synthase inhibitor
3100	26.24	cp	BRD-K18618618	cimetidine	Histamine receptor antagonist
3099	26.27	cp	BRD-K17306061	aprepitant	Tachykinin antagonist
3098	26.28	cp	BRD-K89348303	ramipril	ACE inhibitor
3089	26.42	cp	BRD-K14767410	SC-560	Cyclooxygenase inhibitor
3087	26.52	cp	BRD-K01624546	docosatrienoic-acid	LTB4 inhibitor
3082	26.59	cp	BRD-K92726801	hydrastinine	Haemostatic agent
3081	26.6	cp	BRD-K20986251	lithocholic-acid	FXR antagonist
3074	26.76	cp	BRD-K66615216	moxifloxacin	Bacterial DNA gyrase inhibitor
3071	26.79	cp	BRD-K82147103	lofepramine	Norepinephrine reuptake inhibitor
3067	26.85	cp	BRD-K40530731	hyoscyamine	Acetylcholine receptor antagonist
3063	26.91	cp	BRD-K68402494	ML-9	Myosin light chain kinase inhibitor
3062	26.95	cp	BRD-K50128260	sildenafil	Phosphodiesterase inhibitor
3056	27.11	cp	BRD-K23566484	nilutamide	Androgen receptor antagonist
3048	27.27	cp	BRD-K67017579	cilostazol	Phosphodiesterase inhibitor
3045	27.39	cp	BRD-A32164164	methyllycaconitine	Acetylcholine receptor antagonist
3043	27.41	cp	BRD-K47943470	tyrphostin-51	EGFR inhibitor
3040	27.51	cp	BRD-K61480498	epoxycholesterol	LXR agonist
3038	27.52	cp	BRD-A39390670	rabeprazole	ATPase inhibitor
3036	27.56	cp	BRD-A26711594	nicardipine	Calcium channel blocker
3037	27.56	cp	BRD-K55301415	abiraterone	17,20 lyase inhibitor
3027	27.85	cp	BRD-A80213327	NSC-23766	Ras GTPase inhibitor
3026	27.88	cp	BRD-K18523449	mestanolone	Androgenic steroid
3024	27.94	cp	BRD-K14993104	bemegride	Chemoreceptor agonist
3021	28	cp	BRD-A65280694	molindone	Dopamine receptor antagonist
3015	28.16	cp	BRD-K38305202	domperidone	Dopamine receptor antagonist
3012	28.24	cp	BRD-A01145011	zebularine	DNA methyltransferase inhibitor
3010	28.25	cp	BRD-A78360835	cercosporin	Photoactivated toxin
3004	28.39	cp	BRD-A02710418	meptazinol	Opioid receptor agonist
3002	28.42	cp	BRD-A07780951	orciprenaline	Adrenergic receptor agonist
2993	28.63	cp	BRD-K04170657	psoromic-acid	Ras GTPase inhibitor
2994	28.63	cp	BRD-K57569181	pentoxifylline	Phosphodiesterase inhibitor
2978	28.98	cp	BRD-K64402243	ivachtin	Caspase inhibitor
2977	29.01	cp	BRD-A71009679	KUC103420N	-666
2976	29.02	cp	BRD-K97181089	amiloride	Sodium channel blocker
2969	29.21	cp	BRD-K13926615	vardenafil	Phosphodiesterase inhibitor
2965	29.24	cp	BRD-K35377380	I-OMe-AG-538	IGF-1 inhibitor
2957	29.39	cp	BRD-K47539947	tetradecylthioacetic-acid	Lipid peroxidase inhibitor
2953	29.48	cp	BRD-K64614248	salicin	Anti-inflammatory
2951	29.52	cp	BRD-A64228451	terreic-acid	BTK inhibitor
2950	29.55	cp	BRD-K95992530	Cyclo-[Arg-Gly-Asp-D-Phe-Val]	integrin antagonist
2948	29.61	cp	BRD-K46018455	bezafibrate	PPAR receptor agonist
2947	29.64	cp	BRD-K64514229	toltrazuril	Antiprotozoal
2946	29.66	cp	BRD-K32710582	EI-247	IGF-1 inhibitor
2940	29.85	cp	BRD-K47761761	PD-168077	Dopamine receptor agonist
2939	29.88	cp	BRD-A09161221	nomilin	HSP inhibitor
2935	29.93	cp	BRD-A83855350	naltrexone	Opioid receptor antagonist
2933	29.94	cp	BRD-K30570479	VU-0400195-3	Glutamate receptor modulator
2926	29.98	cp	BRD-A84327315	calcitriol	Vitamin D receptor agonist
2927	29.98	cp	BRD-K49865102	PD-0325901	MEK inhibitor
2925	30.06	cp	BRD-A73605923	mocimycin	Protein synthesis inhibitor
2924	30.1	cp	BRD-K01638814	rilmenidine	Adrenergic receptor agonist
2920	30.14	cp	BRD-K55748775	SCH-28080	ATPase inhibitor
2917	30.18	cp	BRD-A43882281	pinacidil	ATP channel activator
2914	30.3	cp	BRD-A34751532	homosalate	HSP inducer
2912	30.33	cp	BRD-K82135108	elesclomol	Oxidative stress inducer
2909	30.37	cp	BRD-K62353524	DY-131	Estrogen receptor agonist
2905	30.46	cp	BRD-K60038276	irbesartan	Angiotensin receptor antagonist
2902	30.62	cp	BRD-A42167015	carteolol	Adrenergic receptor antagonist
2901	30.63	cp	BRD-A23359898	sibutramine	Serotonin reuptake inhibitor
2900	30.64	cp	BRD-K08556791	ethoprop	Acetylcholinesterase inhibitor
2895	30.7	cp	BRD-A17411484	carprofen	Cyclooxygenase inhibitor
2891	30.76	cp	BRD-K72783841	tyrphostin-AG-555	EGFR inhibitor
2878	30.98	cp	BRD-K24675965	LY-288513	CCK receptor antagonist
2877	31	cp	BRD-A84389633	tropanyl-3,5-dimethylbenzoate	Serotonin receptor antagonist
2874	31.07	cp	BRD-K85383046	IAA-94	Chloride channel blocker
2873	31.08	cp	BRD-A17655518	ibuprofen	Cyclooxygenase inhibitor
2868	31.24	cp	BRD-K93280214	gabazine	GABA receptor antagonist
2866	31.25	cp	BRD-A41250306	cyclopenthiazide	Thiazide diuretic
2864	31.27	cp	BRD-K04993501	cefixime	Bacterial cell wall synthesis inhibitor
2860	31.36	cp	BRD-K71289571	zafirlukast	Leukotriene receptor antagonist
2856	31.51	cp	BRD-K43330982	JTE-013	Lysophospholipid receptor antagonist
2850	31.71	cp	BRD-K34995470	SU-1498	VEGFR inhibitor
2846	31.81	cp	BRD-A44008656	doxylamine	Histamine receptor antagonist
2841	31.91	cp	BRD-K21971034	OM-137	Aurora kinase inhibitor
2829	32.13	cp	BRD-A63836183	PD-123319	Angiotensin receptor antagonist
2824	32.22	cp	BRD-K96134740	kitasamycin	Protein synthesis inhibitor
2816	32.38	cp	BRD-A20239487	atenolol	Adrenergic receptor antagonist
2806	32.69	cp	BRD-A14574269	UB-165	Acetylcholine receptor agonist
2805	32.71	cp	BRD-K13725475	rhodomyrtoxin	Cytotoxic agent
2797	32.83	cp	BRD-K60274257	dephostatin	Tyrosine phosphatase inhibitor
2796	32.86	cp	BRD-K11158509	tyrphostin-B44	EGFR inhibitor
2791	32.98	cp	BRD-K31627533	rimexolone	Glucocorticoid receptor agonist
2788	33.01	cp	BRD-K18574842	nafcillin	Bacterial cell wall synthesis inhibitor
2785	33.06	cp	BRD-K64857848	XMD-885	Leucine rich repeat kinase inhibitor
2773	33.49	cp	BRD-K82484965	carmoxirole	Dopamine receptor agonist
2767	33.67	cp	BRD-A07440155	labetalol	Adrenergic receptor antagonist
2761	33.81	cp	BRD-A61858259	CAY-10415	Insulin sensitizer
2758	33.93	cp	BRD-K18816859	L-694247	Serotonin receptor agonist
2755	33.98	cp	BRD-K15086322	JNJ-10191584	Histamine receptor antagonist
2754	34.03	cp	BRD-K82846253	repaglinide	Insulin secretagogue
2751	34.16	cp	BRD-K83063356	RS-102895	CCR antagonist
2744	34.31	cp	BRD-K28029915	dolasetron	Serotonin receptor antagonist
2741	34.42	cp	BRD-A65671304	candesartan	Angiotensin receptor antagonist
2733	34.53	cp	BRD-K29359156	ebselen	H+/K+-ATPase inhibitor
2732	34.56	cp	BRD-K54704028	BAY-36-7620	Glutamate receptor antagonist
2725	34.68	cp	BRD-K53913732	SB-408124	Orexin receptor antagonist
2720	34.8	cp	BRD-K34154330	tracazolate	GABA receptor modulator
2718	34.82	cp	BRD-K29582115	ziprasidone	Dopamine receptor antagonist
2714	34.86	cp	BRD-K84639753	safinamide	Dopamine uptake inhibitor
2713	34.87	cp	BRD-K39965020	doconexent	PPAR receptor agonist
2708	34.97	cp	BRD-A49765801	fludroxycortide	Glucocorticoid receptor agonist
2702	35.16	cp	BRD-A43974499	reboxetine	Adrenergic receptor antagonist
2697	35.3	cp	BRD-A41555725	chlortetracycline	Protein synthesis inhibitor
2696	35.42	cp	BRD-K61097567	SB-218795	Tachykinin antagonist
2694	35.43	cp	BRD-A79981887	midodrine	Adrenergic receptor agonist
2691	35.45	cp	BRD-K37130656	rivaroxaban	Coagulation inhibitor
2687	35.54	cp	BRD-K47150025	KI-8751	VEGFR inhibitor
2683	35.63	cp	BRD-K84996949	sinensetin	Cyclooxygenase inhibitor
2677	35.83	cp	BRD-K82865713	prostaglandin-b2	cAMP inhibitor
2674	35.91	cp	BRD-A77722753	hydralazine	Vasodilator
2672	35.99	cp	BRD-A13946108	sulindac	Cyclooxygenase inhibitor
2666	36.06	cp	BRD-A87125127	3-matida	Glutamate receptor antagonist
2667	36.06	cp	BRD-A52172093	VU-0413807-2	Calcium channel blocker
2663	36.11	cp	BRD-A96897502	U-74389F	Lipid peroxidase inhibitor
2661	36.12	cp	BRD-K68867920	quetiapine	Dopamine receptor antagonist
2656	36.23	cp	BRD-K50938786	ropivacaine	Sodium channel blocker
2651	36.35	cp	BRD-A72483914	spiroxatrine	Serotonin receptor antagonist
2646	36.43	cp	BRD-K81839095	estrone	Estrogen receptor agonist
2644	36.53	cp	BRD-K77925998	quipazine	Serotonin receptor agonist
2640	36.57	cp	BRD-K43149758	myricetin	Androgen receptor agonist
2641	36.57	cp	BRD-K66876909	linezolid	Bacterial 50S ribosomal subunit inhibitor
2638	36.58	cp	BRD-K36529613	PU-H71	HSP inhibitor
2637	36.62	cp	BRD-A00993607	alprenolol	Adrenergic receptor antagonist
2634	36.68	cp	BRD-K92049597	triamterene	Sodium channel blocker
2631	36.75	cp	BRD-K32164935	tolazamide	ATP channel blocker
2629	36.79	cp	BRD-K53561341	KIN001-220	Aurora kinase inhibitor
2626	36.84	cp	BRD-K23623876	decafluorobutane	Contrast agent
2621	36.9	cp	BRD-K28470988	L-690330	Inositol monophosphatase inhibitor
2611	37.09	cp	BRD-K40645748	mefloquine	Adenosine receptor antagonist
2608	37.14	cp	BRD-K82255054	propofol	GABA receptor agonist
2605	37.22	cp	BRD-K90333595	phentolamine	Adrenergic receptor antagonist
2604	37.25	cp	BRD-K35629949	SR-27897	CCK receptor antagonist
2598	37.33	cp	BRD-K97330509	SRC-kinase-inhibitor-II	SRC inhibitor
2596	37.37	cp	BRD-A67373739	AICA-ribonucleotide	AMPK activator
2592	37.39	cp	BRD-K89930444	AG-592	Tyrosine kinase inhibitor
2593	37.39	cp	BRD-K39733634	L-161982	Prostanoid receptor antagonist
2586	37.54	cp	BRD-K08287586	butylparaben	DNA synthesis inhibitor
2581	37.6	cp	BRD-K10974103	diloxanide	Protein synthesis inhibitor
2580	37.62	cp	BRD-A43930669	L-368899	Oxytocin receptor antagonist
2578	37.64	cp	BRD-K39915878	loxapine	Dopamine receptor antagonist
2577	37.69	cp	BRD-K08973992	linoleic-acid	Oxidative stress inducer
2565	38.01	cp	BRD-K32536677	AGK-2	SIRT inhibitor
2561	38.06	cp	BRD-A89672324	CGP-55845	GABA receptor antagonist
2558	38.16	cp	BRD-K20313525	rosmarinic-acid	GABA transaminase inhibitor
2556	38.19	cp	BRD-A95445494	maackiain	Sodium/glucose cotransporter inhibitor
2550	38.31	cp	BRD-A85472596	L-670596	Prostanoid receptor antagonist
2543	38.4	cp	BRD-K50398167	meclofenamic-acid	Cyclooxygenase inhibitor
2536	38.52	cp	BRD-K12516989	zaprinast	Phosphodiesterase inhibitor
2533	38.53	cp	BRD-K67100011	pivmecillinam	Bacterial cell wall synthesis inhibitor
2530	38.55	cp	BRD-A83326220	brazilin	Nitric oxide production inhibitor
2527	38.59	cp	BRD-A49358627	ciprofibrate	PPAR receptor agonist
2528	38.59	cp	BRD-A65440446	cimaterol	Adrenergic receptor agonist
2521	38.75	cp	BRD-A56675431	altizide	Thiazide diuretic
2520	38.78	cp	BRD-A67862938	naftidrofuryl	Adrenergic receptor antagonist
2519	38.79	cp	BRD-K40619305	larixinic-acid	Compound that interacts with metal centers
2518	38.82	cp	BRD-K88560311	rucaparib	PARP inhibitor
2515	38.87	cp	BRD-K15164005	apoptosis-activator-II	Carboxylesterase inhibitor
2516	38.87	cp	BRD-K93188295	ARC-239	Adrenergic receptor antagonist
2510	38.94	cp	BRD-K97061094	azacyclonol	Histamine receptor antagonist
2505	39	cp	BRD-A10715913	sulpiride	Dopamine receptor antagonist
2497	39.2	cp	BRD-K26373640	IKK-2-inhibitor	IKK inhibitor
2496	39.21	cp	BRD-A79672927	tropicamide	Acetylcholine receptor antagonist
2489	39.28	cp	BRD-A74904029	EI-231	Casein kinase inhibitor
2485	39.37	cp	BRD-K95402279	geranylgeraniol	Farnesyltransferase inhibitor
2473	39.55	cp	BRD-K41996876	tyrphostin-1	EGFR inhibitor
2472	39.57	cp	BRD-K55703048	latrepirdine	Glutamate receptor antagonist
2463	39.78	cp	BRD-K62982419	cilomilast	Phosphodiesterase inhibitor
2461	39.89	cp	BRD-K12357156	AG-490	EGFR inhibitor
2453	40.23	cp	BRD-K21450440	benzthiazide	Carbonic anhydrase inhibitor
2452	40.24	cp	BRD-A19053259	pseudopelletierine	Anthelmintic
2450	40.28	cp	BRD-A01826957	xanthinol	Vasodilator
2446	40.38	cp	BRD-K34098590	tienilic-acid	Sodium/potassium/chloride transporter inhibitor
2445	40.39	cp	BRD-K59037100	oxybenzone	Lipase inhibitor
2442	40.45	cp	BRD-K45446451	JZL-184	Monoacylglucerol lipase inhibitor
2436	40.55	cp	BRD-K29582677	flunarizine	Calcium channel blocker
2420	41.07	cp	BRD-K60476892	YC-1	Guanylyl cyclase activator
2417	41.11	cp	BRD-K64881305	ispinesib	Kinesin-like spindle protein inhibitor
2416	41.12	cp	BRD-K18799075	BAY-59-3074	Cannabinoid receptor partial agonist
2414	41.15	cp	BRD-K73982490	BI-78D3	JNK inhibitor
2412	41.17	cp	BRD-K02607075	tubocurarine	Acetylcholine receptor antagonist
2408	41.3	cp	BRD-K60174629	z-prolyl-prolinal	Prolyl endopeptidase inhibitor
2409	41.3	cp	BRD-K32828673	chelidonine	Tubulin inhibitor
2405	41.36	cp	BRD-A56987319	SQ-22536	Adenylyl cyclase inhibitor
2401	41.56	cp	BRD-K09635134	l-erythro-MAPP	negative control for D-erythro-MAPP
2398	41.57	cp	BRD-K04146668	GW-441756	Growth factor receptor inhibitor
2397	41.6	cp	BRD-A07395371	esmolol	Adrenergic receptor antagonist
2396	41.64	cp	BRD-A06784547	MRS-1334	Adenosine receptor antagonist
2390	41.76	cp	BRD-K28936863	ketotifen	Histamine receptor agonist
2389	41.79	cp	BRD-K46435977	valaciclovir	DNA polymerase inhibitor
2388	41.8	cp	BRD-A41145729	methoprene-acid	Retinoid receptor agonist
2382	41.91	cp	BRD-K46211610	tolazoline	Adrenergic receptor antagonist
2378	42.02	cp	BRD-K74195153	irsogladine	Phosphodiesterase inhibitor
2379	42.02	cp	BRD-K79425933	benperidol	Dopamine receptor antagonist
2372	42.1	cp	BRD-K46212057	voriconazole	Cytochrome P450 inhibitor
2368	42.16	cp	BRD-K00317371	RITA	MDM inhibitor
2367	42.19	cp	BRD-K38436528	imipramine	Norepinephrine reuptake inhibitor
2365	42.21	cp	BRD-K37561857	zardaverine	Phosphodiesterase inhibitor
2358	42.44	cp	BRD-A92826379	lupanine	Sodium channel blocker
2355	42.52	cp	BRD-A02367930	ethinyl-estradiol	DNA directed DNA polymerase stimulant
2349	42.65	cp	BRD-K85925969	zalcitabine	Nucleoside reverse transcriptase inhibitor
2347	42.66	cp	BRD-K84141129	VU-0400193-3	Glutamate receptor modulator
2345	42.69	cp	BRD-K48367671	febuxostat	Xanthine oxidase inhibitor
2343	42.7	cp	BRD-K74913225	brinzolamide	Carbonic anhydrase inhibitor
2339	42.79	cp	BRD-A32949107	MRS-1845	Calcium channel blocker
2326	43.05	cp	BRD-A11990600	lorazepam	Benzodiazepine receptor agonist
2327	43.05	cp	BRD-A93000692	ciglitazone	PPAR receptor agonist
2324	43.09	cp	BRD-K22096725	ALW-II-49-7	Ephrin inhibitor
2323	43.11	cp	BRD-A88774919	doxycycline	Bacterial 30S ribosomal subunit inhibitor
2320	43.13	cp	BRD-A13133631	fluorometholone	Glucocorticoid receptor agonist
2318	43.22	cp	BRD-A56245458	reichstein	Androgen receptor antagonist
2313	43.33	cp	BRD-K68246049	TTNPB	Retinoid receptor agonist
2312	43.34	cp	BRD-A34806832	proscillaridin	ATPase inhibitor
2310	43.37	cp	BRD-A84189516	baccatin-III	Paclitaxel precursor
2303	43.49	cp	BRD-K57546357	prunetin	Breast cancer resistance protein inhibitor
2295	43.68	cp	BRD-K59773493	benzohydroxamic-acid	Antifungal
2287	43.85	cp	BRD-K51751936	alfadolone	GABA receptor agonist
2284	43.87	cp	BRD-A75479906	rimantadine	Antiviral
2281	43.91	cp	BRD-A57457122	VU-0400071-3	Glutamate receptor modulator
2279	43.96	cp	BRD-K38903228	hesperidin	Flavanone glycoside
2274	44.11	cp	BRD-K32412559	morphothebaine	Adrenergic receptor antagonist
2273	44.12	cp	BRD-K50325075	UCL-2077	Slow after hyperpolarization channel blocker
2271	44.15	cp	BRD-K85266041	DNQX	Glutamate receptor antagonist
2269	44.16	cp	BRD-K40887525	ritanserin	Serotonin receptor antagonist
2270	44.16	cp	BRD-A55393291	testosterone	Androgen receptor agonist
2267	44.18	cp	BRD-K19462402	buflomedil	Adrenergic receptor antagonist
2265	44.23	cp	BRD-K56614220	clofazimine	GK0582 inhibitor
2257	44.39	cp	BRD-A09094913	strychnine	Acetylcholine receptor antagonist
2256	44.4	cp	BRD-K70557564	zosuquidar	P-glycoprotein inhibitor
2253	44.42	cp	BRD-A93659613	GR-89696	Opioid receptor agonist
2250	44.52	cp	BRD-K98769987	flumazenil	Benzodiazepine receptor antagonist
2246	44.61	cp	BRD-A16700644	isoxsuprine	Adrenergic receptor agonist
2234	44.79	cp	BRD-A75935363	atracurium	Acetylcholine receptor antagonist
2230	44.89	cp	BRD-A33084410	5'-guanidinonaltrindole	Opioid receptor antagonist
2225	45.03	cp	BRD-K07117950	imperatorin	CDK inhibitor
2222	45.09	cp	BRD-K43764301	dexketoprofen	Cyclooxygenase inhibitor
2221	45.1	cp	BRD-A51820102	econazole	Bacterial cell wall synthesis inhibitor
2217	45.14	cp	BRD-A85234536	N6-cyclopentyladenosine	Adenosine receptor agonist
2216	45.16	cp	BRD-K96271548	coumaric-acid	Antioxidant
2211	45.32	cp	BRD-K28667793	pyrazinamide	Fatty acid synthase inhibitor
2209	45.36	cp	BRD-K68507560	dicycloverine	Acetylcholine receptor antagonist
2203	45.54	cp	BRD-A31312900	montelukast	Leukotriene receptor antagonist
2198	45.6	cp	BRD-K85090592	pilocarpine	Acetylcholine receptor agonist
2197	45.63	cp	BRD-K67043667	altretamine	DNA synthesis inhibitor
2196	45.68	cp	BRD-K18905250	ST-91	Adrenergic receptor agonist
2194	45.78	cp	BRD-K38003476	clocortolone	Glucocorticoid receptor agonist
2188	45.91	cp	BRD-K93658967	aloisine	CDK inhibitor
2182	46.17	cp	BRD-K77625572	etomoxir	Carnitine palmitoyltransferase inhibitor
2179	46.23	cp	BRD-K00959089	thenoyltrifluoroacetone	Chelating agent
2181	46.23	cp	BRD-A10523515	GSK-429286A	Rho associated kinase inhibitor
2175	46.32	cp	BRD-A43974575	tranylcypromine	Monoamine oxidase inhibitor
2172	46.43	cp	BRD-K46937689	phenazone	Cyclooxygenase inhibitor
2169	46.57	cp	BRD-K49404994	levetiracetam	Calcium channel blocker
2167	46.61	cp	BRD-K19533706	tranilast	Angiogenesis inhibitor
2160	46.72	cp	BRD-A96456596	FPL-55712	Leukotriene receptor antagonist
2150	46.97	cp	BRD-K00656370	6-aminochrysene	Transferase inhibitor
2149	47	cp	BRD-K09991945	GSK-3-inhibitor-II	PKC inhibitor
2148	47.02	cp	BRD-K48935217	epothilone	Microtubule inhibitor
2147	47.09	cp	BRD-K08806317	timolol	Adrenergic receptor antagonist
2137	47.35	cp	BRD-K04185004	oxybuprocaine	Local anesthetic
2136	47.36	cp	BRD-K09668667	benzo(a)pyrene	Carcinogen
2134	47.38	cp	BRD-K19605405	ZM-241385	Adenosine receptor antagonist
2133	47.4	cp	BRD-A85025557	NCS-382	GABA receptor antagonist
2130	47.55	cp	BRD-K26669427	WR-216174	PFMRK inhibitor
2122	47.68	cp	BRD-K26573499	DMAB-anabaseine	Adrenergic receptor agonist
2118	47.74	cp	BRD-A52193669	withaferin-a	IKK inhibitor
2108	47.98	cp	BRD-A08187463	racecadotril	Enkephalinase inhibitor
2109	47.98	cp	BRD-K94830329	ataluren	CFTR channel agonist
2106	48	cp	BRD-K57886322	fluocinonide	Glucocorticoid receptor agonist
2096	48.12	cp	BRD-K34092021	arvanil	TRPV agonist
2090	48.25	cp	BRD-A52282606	lacidipine	Calcium channel blocker
2091	48.25	cp	BRD-K15402119	huperzine-a	Acetylcholinesterase inhibitor
2083	48.42	cp	BRD-K19111024	clofibric-acid	PPAR receptor agonist
2076	48.54	cp	BRD-A47706533	L-BSO	Glutathione transferase inhibitor
2068	48.71	cp	BRD-A27554692	altrenogest	Progestogen hormone
2065	48.74	cp	BRD-K32584078	BML-257	AKT inhibitor
2066	48.74	cp	BRD-K63533170	AM-630	Cannabinoid receptor antagonist
2061	48.89	cp	BRD-K62810658	PD-98059	MEK inhibitor
2058	48.92	cp	BRD-K43978949	PIT	Purinergic receptor antagonist
2053	49.09	cp	BRD-K81376179	TCS-359	FLT3 inhibitor
2051	49.12	cp	BRD-A93206962	L-755507	Adrenergic receptor agonist
2049	49.18	cp	BRD-K22631935	neurodazine	Neurogenesis of non-pluripotent C2C12 myoblast inducer
2046	49.2	cp	BRD-K24526313	levcromakalim	Potassium channel activator
2047	49.2	cp	BRD-K18194590	mephentermine	Adrenergic receptor agonist
2040	49.27	cp	BRD-A28105619	cucurbitacin-i	JAK inhibitor
2037	49.37	cp	BRD-K72024482	MRS-1754	Adenosine receptor antagonist
2035	49.38	cp	BRD-K07303502	arachidonyl-trifluoro-methane	Cytosolic phospholipase inhibitor
2036	49.38	cp	BRD-K12762134	XAV-939	Tankyrase inhibitor
2031	49.46	cp	BRD-K27871032	lysergol	Ergoline alkaloid
2030	49.5	cp	BRD-K33860217	CP-94253	Serotonin receptor agonist
2022	49.63	cp	BRD-K13032584	procarbazine	Monoamine oxidase inhibitor
2018	49.68	cp	BRD-K80778372	RO-19-4605	GABA benzodiazepine site receptor inverse agonist
2013	49.76	cp	BRD-M07438658	lapatinib	EGFR inhibitor
2012	49.8	cp	BRD-K28137194	loreclezole	GABA receptor agonist
2011	49.86	cp	BRD-K15502390	nevirapine	Reverse transcriptase inhibitor
2010	49.89	cp	BRD-K52620403	STO-609	Calmodulin antagonist
2004	50.04	cp	BRD-K82746043	navitoclax	BCL inhibitor
2003	50.05	cp	BRD-K81729199	AQ-RA741	Acetylcholine receptor antagonist
2002	50.06	cp	BRD-K14807180	SB-221284	Serotonin receptor antagonist
1998	50.12	cp	BRD-K88868628	iodoacetic-acid	Cysteine peptidase inhibitor
1997	50.14	cp	BRD-K56596464	QX-314	Sodium channel blocker
1992	50.22	cp	BRD-K04196797	oxcarbazepine	Sodium channel blocker
1991	50.23	cp	BRD-A38913120	BH3I-1	BCL inhibitor
1988	50.28	cp	BRD-K66766661	17-beta-estradiol	Estrogen receptor agonist
1987	50.29	cp	BRD-A47633927	NPC-15199	ICAM1 antagonist
1982	50.43	cp	BRD-A55756846	H-7	PKA inhibitor
1957	50.91	cp	BRD-K60770992	pergolide	Dopamine receptor agonist
1951	51.13	cp	BRD-A35338386	NECA	Adenosine receptor agonist
1952	51.13	cp	BRD-A42346008	metanephrine	Epinephrine metabolite
1950	51.2	cp	BRD-K26015241	ODQ	Guanylyl cyclase inhibitor
1942	51.49	cp	BRD-K99063460	didanosine	Nucleoside reverse transcriptase inhibitor
1937	51.62	cp	BRD-K61217870	n-(3-acetamidophenyl)-3-chlorobenzamide	Glutamate receptor antagonist
1935	51.64	cp	BRD-K51941867	LM-1685	Cyclooxygenase inhibitor
1934	51.69	cp	BRD-K01612348	meropenem	Bacterial cell wall synthesis inhibitor
1926	51.78	cp	BRD-K92778217	mefenamic-acid	Cyclooxygenase inhibitor
1921	51.93	cp	BRD-K37792168	denbufylline	Phosphodiesterase inhibitor
1915	52	cp	BRD-A12016240	LY-278584	Serotonin receptor antagonist
1911	52.09	cp	BRD-K32977963	eugenol	Androgen receptor antagonist
1907	52.13	cp	BRD-K40255344	tyrphostin-A9	Protein tyrosine kinase inhibitor
1906	52.14	cp	BRD-A73859745	glycodeoxycholic-acid	Apoptosis stimulant
1904	52.16	cp	BRD-K75181824	acetyl-geranygeranyl-cysteine	Inhibitor of methyl esterification of geranylgeranylated proteins
1897	52.38	cp	BRD-A43671941	oxprenolol	Adrenergic receptor antagonist
1894	52.44	cp	BRD-K50384076	7,4'-dihydroxyflavone	Opioid receptor antagonist
1892	52.5	cp	BRD-K88701661	dimercaptosuccinic-acid	Chelating agent
1889	52.54	cp	BRD-K57304726	PRE-084	Sigma receptor agonist
1880	52.74	cp	BRD-K54790157	trioxsalen	DNA synthesis inhibitor
1873	52.82	cp	BRD-K10136726	tosyllysyl-chloromethyl-ketone	Chymotrypsin inhibitor
1861	53.09	cp	BRD-A71459254	cymarin	ATPase inhibitor
1857	53.17	cp	BRD-K90543092	levonorgestrel	Estrogen receptor agonist
1856	53.24	cp	BRD-K87226815	cycloserine	Bacterial cell wall synthesis inhibitor
1853	53.3	cp	BRD-A80017228	bendroflumethiazide	Sodium/potassium/chloride transporter inhibitor
1844	53.39	cp	BRD-K17415526	tyrphostin-AG-835	Protein tyrosine kinase inhibitor
1839	53.5	cp	BRD-A36318220	necrostatin-1	RIPK inhibitor
1837	53.61	cp	BRD-K28428262	brivanib	FGFR inhibitor
1835	53.66	cp	BRD-K47207162	zimelidine	Serotonin reuptake inhibitor
1833	53.72	cp	BRD-K34170797	fexaramine	FXR agonist
1830	53.8	cp	BRD-K06080977	eicosatetraynoic-acid	Cyclooxygenase inhibitor
1829	53.82	cp	BRD-A75402480	desoxycorticosterone	Mineralocorticoid receptor agonist
1826	53.9	cp	BRD-A13807286	HA-14-1	BCL inhibitor
1825	53.94	cp	BRD-K96862998	pirfenidone	TGF beta receptor inhibitor
1824	53.96	cp	BRD-K52459643	prostaglandin-e1	Prostanoid receptor agonist
1821	54.02	cp	BRD-K86873305	piperacillin	Bacterial cell wall synthesis inhibitor
1822	54.02	cp	BRD-K16336526	capsaicin	TRPV agonist
1819	54.09	cp	BRD-K02867583	minaprine	Serotonin reuptake inhibitor
1818	54.1	cp	BRD-K15600710	obatoclax	BCL inhibitor
1812	54.36	cp	BRD-K96670504	lonidamine	Glucokinase inhibitor
1813	54.36	cp	BRD-K50859149	sulfafurazole	Bacterial antifolate
1809	54.4	cp	BRD-K64785675	TG100-115	-666
1803	54.56	cp	BRD-K66093087	FGIN-1-43	Benzodiazepine receptor agonist
1800	54.6	cp	BRD-K99411983	lumicolchicine	Colchicine isomer, non-binder of microtubules
1801	54.6	cp	BRD-K31283835	tofacitinib	JAK inhibitor
1799	54.61	cp	BRD-K44876623	zolpidem	Benzodiazepine receptor agonist
1797	54.62	cp	BRD-K74141488	naftifine	Fungal squalene epoxidase inhibitor
1777	55.04	cp	BRD-A54927599	KF-38789	P-selectin inhibitor
1774	55.07	cp	BRD-K14965640	ibuprofen	Cyclooxygenase inhibitor
1771	55.17	cp	BRD-A97739905	ketoprofen	Cyclooxygenase inhibitor
1768	55.21	cp	BRD-A15435692	BMY-14802	Sigma receptor antagonist
1767	55.23	cp	BRD-K44849676	capsazepine	TRPV agonist
1765	55.26	cp	BRD-A62434282	goserelin	Gonadotropin releasing factor hormone receptor agonist
1754	55.57	cp	BRD-K84085265	CG-930	JNK inhibitor
1755	55.57	cp	BRD-K45861246	azaperone	Dopamine receptor antagonist
1752	55.65	cp	BRD-K72816382	cinalukast	Leukotriene receptor antagonist
1735	56.18	cp	BRD-A46186775	hydrocortisone	Glucocorticoid receptor agonist
1732	56.24	cp	BRD-K48427617	U-0124	MEK inhibitor
1731	56.25	cp	BRD-K29668683	BD-1063	Sigma receptor antagonist
1723	56.42	cp	BRD-K96354014	nifedipine	Calcium channel blocker
1721	56.43	cp	BRD-K87048468	RS-102221	Serotonin receptor antagonist
1717	56.58	cp	BRD-K60511616	pravastatin	HMGCR inhibitor
1714	56.7	cp	BRD-K49519092	immethridine	Histamine receptor agonist
1712	56.81	cp	BRD-K81709173	halcinonide	Glucocorticoid receptor agonist
1709	56.89	cp	BRD-K31491153	1-phenylbiguanide	Serotonin receptor agonist
1707	57.02	cp	BRD-K36258877	AZ-10417808	Caspase inhibitor
1706	57.07	cp	BRD-A95513702	androsta-1,4-dien-3,17-dione	Aromatase inhibitor
1700	57.35	cp	BRD-K14880289	GW-501516	PPAR receptor agonist
1699	57.37	cp	BRD-K44067360	flufenamic-acid	Chloride channel blocker
1695	57.44	cp	BRD-K35559145	levomepromazine	Dopamine receptor antagonist
1692	57.49	cp	BRD-A16665823	butoconazole	Bacterial cell wall synthesis inhibitor
1690	57.51	cp	BRD-K36638830	anabasine	Acetylcholine receptor agonist
1688	57.53	cp	BRD-K04010869	prostaglandin-a1	HSP inducer
1687	57.54	cp	BRD-A29644307	nomifensine	Dopamine uptake inhibitor
1686	57.55	cp	BRD-K97564742	mepyramine	Histamine receptor antagonist
1685	57.67	cp	BRD-A15914070	4-hydroxy-2-nonenal	Cytotoxic lipid peroxidation product
1675	58.02	cp	BRD-A97479839	piperidolate	Acetylcholine receptor antagonist
1671	58.27	cp	BRD-K76205745	losartan	Angiotensin receptor antagonist
1667	58.31	cp	BRD-A96799240	4-hydroxyretinoic-acid	Retinoid receptor binder
1666	58.37	cp	BRD-K46862739	metyrapone	Cytochrome P450 inhibitor
1662	58.45	cp	BRD-K00675675	CL-82198	Metalloproteinase inhibitor
1658	58.52	cp	BRD-K41731458	triclosan	Enoyl-[acyl-carrier-protein] reductase [NADH] inhibitor
1654	58.63	cp	BRD-K61314889	IWR-1-ENDO	PARP inhibitor
1646	58.84	cp	BRD-K37846922	3,3'-diindolylmethane	CHK inhibitor
1645	58.87	cp	BRD-A89175223	bisoprolol	Adrenergic receptor antagonist
1643	58.88	cp	BRD-K23335153	AMN-082	Glutamate receptor modulator
1642	58.9	cp	BRD-K84175871	pseudoephedrine	Adrenergic receptor agonist
1638	58.92	cp	BRD-A22143024	estropipate	Estrogen receptor agonist
1635	59.01	cp	BRD-A91699651	chloroquine	Antimalarial
1625	59.27	cp	BRD-K08115555	tyrphostin-AG-1288	TNF production inhibitor
1624	59.3	cp	BRD-A71157293	fursultiamine	Vitamin B
1621	59.32	cp	BRD-K42679050	Y-27152	Potassium channel activator
1620	59.33	cp	BRD-K94353609	fluocinolone	Glucocorticoid receptor agonist
1617	59.47	cp	BRD-A36217750	sulfinpyrazone	Uricosuric blocker
1611	59.59	cp	BRD-K24994810	androstenol	GABA receptor modulator
1607	59.7	cp	BRD-M45964048	verteporfin	Photosensitizing agent
1605	59.72	cp	BRD-K74430258	1,2-dichlorobenzene	Hepatotoxicant
1599	59.81	cp	BRD-K18895904	olanzapine	Dopamine receptor antagonist
1594	59.98	cp	BRD-K86595100	chlordiazepoxide	Benzodiazepine receptor agonist
1593	60.03	cp	BRD-K37865504	LY-2183240	FAAH inhibitor
1587	60.17	cp	BRD-K79684402	RO-10-5824	Dopamine receptor agonist
1579	60.27	cp	BRD-K67860401	AR-A014418	Glycogen synthase kinase inhibitor
1576	60.28	cp	BRD-K46384212	o-3M3FBS	phospholipase activator
1577	60.28	cp	BRD-K48168960	propylthiouracil	Thyroid peroxidase inhibitor
1567	60.48	cp	BRD-A64092382	mexiletine	Sodium channel blocker
1565	60.53	cp	BRD-K38323065	phenacetin	Cyclooxygenase inhibitor
1564	60.55	cp	BRD-K15933101	ropinirole	Dopamine receptor agonist
1561	60.56	cp	BRD-K70241288	L-692585	Growth hormone releasing peptide ligand agonist
1559	60.6	cp	BRD-K32755366	reserpic-acid	Norepinephrine transporter inhibitor
1558	60.62	cp	BRD-A84493640	atovaquone	Mitochondrial electron transport inhibitor
1555	60.66	cp	BRD-K01253243	SB-590885	RAF inhibitor
1546	60.8	cp	BRD-A09495397	bicuculline	GABA receptor antagonist
1545	60.84	cp	BRD-K64606589	apicidin	HDAC inhibitor
1541	61.04	cp	BRD-A52588987	SKF-83566	Dopamine receptor antagonist
1540	61.07	cp	BRD-K39120595	bithionol	Autotaxin inhibitor
1527	61.26	cp	BRD-A54880345	etomidate	GABA receptor modulator
1525	61.32	cp	BRD-K83637872	SANT-1	Smoothened receptor antagonist
1524	61.36	cp	BRD-A42759514	ornidazole	Antiprotozoal
1515	61.53	cp	BRD-K88358234	xaliproden	Serotonin receptor agonist
1510	61.69	cp	BRD-K26997899	SA-792574	Microtubule inhibitor
1508	61.76	cp	BRD-K05977355	fluconazole	Sterol demethylase inhibitor
1506	61.82	cp	BRD-A55416093	colforsin	Adenylyl cyclase activator
1505	61.84	cp	BRD-K99696746	fatostatin	SREBP inhibitor
1503	61.87	cp	BRD-K91145395	prostratin	PKC activator
1502	61.91	cp	BRD-K61341215	vecuronium	Acetylcholine receptor antagonist
1501	61.93	cp	BRD-A29437505	RWJ-21757	TLR agonist
1500	61.94	cp	BRD-U94846492	quinine	Hemozoin biocrystallization inhibitor
1498	62.09	cp	BRD-K63874012	thioperamide	Histamine receptor antagonist
1484	62.44	cp	BRD-K47328134	lysylphenylalanyl-tyrosine	Heparin activation inhibitor
1482	62.46	cp	BRD-A98378129	talniflumate	Cyclooxygenase inhibitor
1481	62.47	cp	BRD-K38055836	etamivan	Respiratory stimulant
1480	62.49	cp	BRD-K84595254	strophanthidin	ATPase inhibitor
1470	62.67	cp	BRD-A47144777	dihydro-7-desacetyldeoxygedunin	HSP inhibitor
1468	62.69	cp	BRD-K03816923	rottlerin	MAP kinase inhibitor
1467	62.77	cp	BRD-K70881766	solanine	Acetylcholinesterase inhibitor
1461	62.9	cp	BRD-K02275692	cefotiam	Bacterial cell wall synthesis inhibitor
1458	62.97	cp	BRD-K19525698	ozagrel	Thromboxane synthase inhibitor
1457	62.99	cp	BRD-K18135438	chenodeoxycholic-acid	11-beta-HSD1 inhibitor
1455	63.06	cp	BRD-A24429032	HEAT	Adrenergic receptor antagonist
1453	63.07	cp	BRD-K43236057	piceid	ICAM1 inhibitor
1454	63.07	cp	BRD-K87932577	CDK1-5-inhibitor	CDK inhibitor
1452	63.08	cp	BRD-K41713976	E-4031	Potassium channel blocker
1450	63.13	cp	BRD-A42628519	iopanoic-acid	Radiopaque medium
1442	63.35	cp	BRD-K17868609	BRL-54443	Serotonin receptor agonist
1441	63.36	cp	BRD-K98763141	niflumic-acid	Cyclooxygenase inhibitor
1423	63.74	cp	BRD-K05395900	nicotine	Acetylcholine receptor agonist
1418	63.92	cp	BRD-K93080877	Ala-Ala-Phe-CMK	Tripeptidyl peptidase inhibitor
1416	63.94	cp	BRD-A99177642	deltaline	Acetylcholine receptor antagonist
1414	63.98	cp	BRD-A54487287	cortisone	Glucocorticoid receptor agonist
1406	64.12	cp	BRD-K93461745	buspirone	Serotonin receptor agonist
1405	64.19	cp	BRD-K67174588	toremifene	Estrogen receptor antagonist
1399	64.46	cp	BRD-A04668240	CGP-52432	GABA receptor antagonist
1391	64.69	cp	BRD-K36324071	NF-449	Purinergic receptor antagonist
1392	64.69	cp	BRD-K07325606	hispidin	PKC inhibitor
1388	64.74	cp	BRD-K92984783	melperone	Serotonin receptor antagonist
1385	64.78	cp	BRD-K73319509	PF-04217903	c-Met inhibitor
1384	64.8	cp	BRD-A75552914	isoxicam	Cyclooxygenase inhibitor
1381	64.84	cp	BRD-K84895041	BMY-45778	IP1 prostacyclin receptor agonist
1380	64.86	cp	BRD-K15563106	phloretin	Sodium/glucose cotransporter inhibitor
1375	65.05	cp	BRD-A30815329	felodipine	Calcium channel blocker
1372	65.13	cp	BRD-A45664787	iloprost	Platelet aggregation inhibitor
1370	65.15	cp	BRD-U01690642	acetyl-geranyl-cysteine	Isoprenylated protein methylation inhibitor
1367	65.19	cp	BRD-K32836707	CAY-10577	Casein kinase inhibitor
1364	65.28	cp	BRD-K27665173	D-64406	PDGFR receptor inhibitor
1358	65.43	cp	BRD-K67844266	MLN-4924	Nedd activating enzyme inhibitor
1351	65.54	cp	BRD-M40783228	mesna	Antioxidant
1345	65.62	cp	BRD-A36267905	buphenine	Adrenergic receptor agonist
[truncated: 430 more rows]

## Sheet: L1000 & imputed
Rank	Score	Type	ID	Name	Description
8550	-99.93	cp	BRD-A23072235	pheniramine	Histamine receptor antagonist
8534	-99.82	cp	BRD-A47513740	calyculin	Protein phosphatase inhibitor
8530	-99.72	cp	BRD-K70577657	H-9	PKA inhibitor
8519	-99.54	cp	BRD-K30990140	FR-122047	Cyclooxygenase inhibitor
8516	-99.47	cp	BRD-A85860691	chaetocin	Histone lysine methyltransferase inhibitor
8508	-99.43	cp	BRD-A95696820	acadesine	AMPK activator
8502	-99.4	cp	BRD-K79366068	PSB-069	NTPDase inhibitor
8487	-99.33	cp	BRD-K91733562	secoisolariciresinol	Antioxidant
8480	-99.26	cp	BRD-U68942961	JW-7-24-1	LCK Inhibitor
8473	-99.19	cp	BRD-K74212935	ergocryptine	Dopamine agonist
8467	-99.12	cp	BRD-K32318651	acyclovir	DNA polymerase inhibitor
8457	-98.96	cp	BRD-K29178788	dictamnine	Furoquinoline alkaloid
8455	-98.95	cp	BRD-K18059238	gamma-linolenic-acid	Cyclooxygenase inhibitor
8440	-98.72	cp	BRD-A76279427	myriocin	Serine palmitoyltransferase inhibitor
8435	-98.67	cp	BRD-K63265447	docetaxel	Tubulin inhibitor
8429	-98.59	cp	BRD-K76617868	fasudil	Rho associated kinase inhibitor
8428	-98.58	cp	BRD-K60623809	SU-11652	Tyrosine kinase inhibitor
8416	-98.38	cp	BRD-K93331255	lypressin	Vasopressin receptor agonist
8417	-98.38	cp	BRD-K04853698	LDN-193189	Serine/threonine kinase inhibitor
8418	-98.38	cp	BRD-K82577285	dipropyl-dopamine	Dopamine receptor agonist
8407	-98.26	cp	BRD-K22947005	dexbrompheniramine	Histamine receptor antagonist
8406	-98.23	cp	BRD-K58299615	RO-90-7501	Beta amyloid inhibitor
8405	-98.21	cp	BRD-K12219985	glipizide	Sulfonylurea
8403	-98.14	cp	BRD-K63430059	methoxsalen	DNA synthesis inhibitor
8399	-98.11	cp	BRD-K81209159	herniarin	Acetylcholinesterase inhibitor
8396	-98.06	cp	BRD-K55301415	abiraterone	17,20 lyase inhibitor
8395	-98.03	cp	BRD-K49669041	BX-912	Pyruvate dehydrogenase kinase inhibitor
8393	-97.98	cp	BRD-K33226500	indinavir	HIV protease inhibitor
8392	-97.97	cp	BRD-K30097969	pitavastatin	HMGCR inhibitor
8388	-97.94	cp	BRD-K46556543	canrenoic-acid	Mineralocorticoid receptor antagonist
8387	-97.92	cp	BRD-A09539288	homatropine	Acetylcholine receptor antagonist
8383	-97.89	cp	BRD-M41783010	acamprosate	Glutamate receptor antagonist
8380	-97.8	cp	BRD-K68143200	SA-792541	CDC inhibitor
8377	-97.75	cp	BRD-A87848830	bimatoprost	Prostanoid receptor agonist
8375	-97.71	cp	BRD-A80960055	celastrol	Anti-inflammatory
8373	-97.68	cp	BRD-K11373525	ZD-7155	Angiotensin receptor antagonist
8372	-97.67	cp	BRD-K92492521	LY-255283	Leukotriene receptor antagonist
8370	-97.65	cp	BRD-K25079130	avrainvillamide-analog-4	nucleophosmin inhibitor
8369	-97.64	cp	BRD-A69512159	carbidopa	Aromatic L-amino acid decarboxylase inhibitor
8366	-97.62	cp	BRD-K02227374	milnacipran	Serotonin reuptake inhibitor
8367	-97.62	cp	BRD-K78126613	menadione	Mitochondrial DNA polymerase inhibitor
8361	-97.57	cp	BRD-K55044200	amoxicillin	Penicillin binding protein inhibitor
8359	-97.53	cp	BRD-K02407574	parbendazole	Tubulin inhibitor
8357	-97.5	cp	BRD-K00603606	ticlopidine	Purinergic receptor antagonist
8355	-97.43	cp	BRD-K67977190	eprosartan	Angiotensin receptor antagonist
8353	-97.39	cp	BRD-A79465854	auranofin	NFkB pathway inhibitor
8349	-97.36	cp	BRD-K42452249	EO-1428	p38 MAPK inhibitor
8350	-97.36	cp	BRD-K14920963	erythrosine	Coloring agent
8348	-97.35	cp	BRD-K50140147	NVP-TAE684	ALK inhibitor
8344	-97.29	cp	BRD-A70731303	avrainvillamide-analog-5	nucleophosmin inhibitor
8331	-97.16	cp	BRD-K32398298	alprazolam	Benzodiazepine receptor agonist
8327	-97.15	cp	BRD-U33728988	QL-X-138	MTOR inhibitor
8328	-97.15	cp	BRD-K19462402	buflomedil	Adrenergic receptor antagonist
8329	-97.15	cp	BRD-A21858158	praziquantel	Anthelmintic
8326	-97.14	cp	BRD-K67578145	GDC-0879	RAF inhibitor
8323	-97.11	cp	BRD-K15891719	tenofovir	Reverse transcriptase inhibitor
8321	-97.04	cp	BRD-K19540840	saracatinib	SRC inhibitor
8314	-96.95	cp	BRD-K80348542	cephaeline	Protein synthesis inhibitor
8302	-96.79	cp	BRD-A13650332	flucloxacillin	Bacterial cell wall synthesis inhibitor
8296	-96.69	cp	BRD-A27489425	rolitetracycline	Bacterial 30S ribosomal subunit inhibitor
8295	-96.68	cp	BRD-K07237224	moclobemide	Monoamine oxidase inhibitor
8293	-96.67	cp	BRD-K68756823	FR-180204	-666
8290	-96.65	cp	BRD-K07303502	arachidonyl-trifluoro-methane	Cytosolic phospholipase inhibitor
8288	-96.63	cp	BRD-K15592317	CP466722	ATM kinase inhibitor
8284	-96.55	cp	BRD-K94379058	BML-190	Cannabinoid receptor inverse agonist
8278	-96.48	cp	BRD-K40992116	parachlorophenol	Anti-infective
8279	-96.48	cp	BRD-A25687296	emetine	Protein synthesis inhibitor
8277	-96.47	cp	BRD-A61856038	tremulacin	Lipoxygenase inhibitor
8274	-96.44	cp	BRD-K54256913	MK-1775	WEE1 kinase inhibitor
8264	-96.33	cp	BRD-K76534306	enrofloxacin	Bacterial DNA gyrase inhibitor
8263	-96.31	cp	BRD-A04706586	bucladesine	Adenosine receptor agonist
8254	-96.12	cp	BRD-K73982490	BI-78D3	JNK inhibitor
8255	-96.12	cp	BRD-A50928468	norgestrel	Progesterone receptor agonist
8246	-96.02	cp	BRD-K48932581	cetraxate	Mucus protecting agent
8243	-95.99	cp	BRD-K61341215	vecuronium	Acetylcholine receptor antagonist
8242	-95.95	cp	BRD-A00267231	hemado	Adenosine receptor agonist
8239	-95.91	cp	BRD-U37049823	HG-6-64-01	RAF inhibitor
8227	-95.71	cp	BRD-K63641886	cefuroxime	Bacterial cell wall synthesis inhibitor
8228	-95.71	cp	BRD-K07881437	danusertib	Aurora kinase inhibitor
8224	-95.7	cp	BRD-A98283014	calmidazolium	Calcium channel blocker
8217	-95.56	cp	BRD-K27721098	clopidogrel	Purinergic receptor antagonist
8208	-95.49	cp	BRD-A60294240	tribenoside	Anti-inflammatory
8200	-95.38	cp	BRD-K17705806	JTC-801	Opioid receptor antagonist
8197	-95.36	cp	BRD-A06352418	terfenadine	Histamine receptor antagonist
8196	-95.35	cp	BRD-A80793822	pemoline	Dopamine receptor agonist
8194	-95.3	cp	BRD-K13514097	everolimus	MTOR inhibitor
8192	-95.29	cp	BRD-A36630025	SN-38	Topoisomerase inhibitor
8191	-95.28	cp	BRD-A07824748	flavanone	11-beta-HSD1 inhibitor
8187	-95.18	cp	BRD-K50495309	SRC-kinase-inhibitor-I	SRC inhibitor
8181	-95.02	cp	BRD-K68558722	deracoxib	Cyclooxygenase inhibitor
8178	-94.98	cp	BRD-K76674262	homoharringtonine	Protein synthesis inhibitor
8177	-94.96	cp	BRD-K11158509	tyrphostin-B44	EGFR inhibitor
8170	-94.87	cp	BRD-K92428232	GSK-461364	PLK inhibitor
8169	-94.82	cp	BRD-A26002865	verrucarin-a	Protein synthesis inhibitor
8161	-94.68	cp	BRD-K06792661	narciclasine	Coflilin signaling pathway activator
8156	-94.61	cp	BRD-A52193669	withaferin-a	IKK inhibitor
8154	-94.6	cp	BRD-A04308630	genipin	Choleretic agent
8145	-94.4	cp	BRD-K77947974	fluspirilene	Dopamine receptor antagonist
8143	-94.39	cp	BRD-K00312224	PPT	Estrogen receptor agonist
8140	-94.38	cp	BRD-K98490050	amsacrine	Topoisomerase inhibitor
8138	-94.36	cp	BRD-K28296557	AKT-inhibitor-IV	AKT inhibitor
8128	-94.21	cp	BRD-K36258877	AZ-10417808	Caspase inhibitor
8119	-94.09	cp	BRD-K02283807	GR-32191	Thromboxane receptor antagonist
8118	-94.08	cp	BRD-K59369769	tozasertib	Aurora kinase inhibitor
8111	-93.97	cp	BRD-K84663978	trequinsin	Phosphodiesterase inhibitor
8108	-93.94	cp	BRD-K24132293	piperlongumine	Glutathione transferase inhibitor
8105	-93.93	cp	BRD-K15409150	penfluridol	T-type calcium channel blocker
8103	-93.88	cp	BRD-K14965640	ibuprofen	Cyclooxygenase inhibitor
8101	-93.87	cp	BRD-K89274813	DMP-543	Acetylcholine release stimulant
8100	-93.84	cp	BRD-K02590140	O-2050	Cannabinoid receptor antagonist
8098	-93.8	cp	BRD-K39621635	artemether	Antimalarial
8095	-93.72	cp	BRD-A36074203	remacemide	Glutamate receptor antagonist
8089	-93.64	cp	BRD-A19736161	ondansetron	Serotonin receptor antagonist
8087	-93.62	cp	BRD-K49945136	GR-113808	Serotonin receptor antagonist
8086	-93.6	cp	BRD-K33308633	INCA-6	Calcineurin inhibitor
8084	-93.53	cp	BRD-K83963101	MLN-8054	Aurora kinase inhibitor
8081	-93.44	cp	BRD-A00758722	noretynodrel	Progestogen hormone
8082	-93.44	cp	BRD-K92723993	imatinib	BCR-ABL kinase inhibitor
8080	-93.37	cp	BRD-A79314293	cephalosporanic-acid	Bacterial cell wall synthesis inhibitor
8074	-93.3	cp	BRD-K93080877	Ala-Ala-Phe-CMK	Tripeptidyl peptidase inhibitor
8071	-93.23	cp	BRD-K15519488	CS-110266	Dopamine receptor agonist
8069	-93.16	cp	BRD-A20131130	2',5'-dideoxyadenosine	Adenylyl cyclase inhibitor
8065	-93.02	cp	BRD-K24681473	YM-155	Survivin inhibitor
8061	-93	cp	BRD-K17140735	SCH-79797	Proteasome inhibitor
8059	-92.99	cp	BRD-K79877282	PF-543	Sphingosine kinase inhibitor
8057	-92.97	cp	BRD-K41567364	SB-334867	Orexin receptor antagonist
8050	-92.75	cp	BRD-K17953061	staurosporine	PKC inhibitor
8049	-92.74	cp	BRD-K94441233	mevastatin	HMGCR inhibitor
8045	-92.7	cp	BRD-K46056750	AZD-7762	CHK inhibitor
8043	-92.68	cp	BRD-K06221026	DUP-697	Cyclooxygenase inhibitor
8041	-92.66	cp	BRD-K74402642	NSC-632839	Ubiquitin specific protease inhibitor
8040	-92.65	cp	BRD-A02481876	importazole	Importin-beta transport receptor inhibitor
8038	-92.62	cp	BRD-K45401373	betulinic-acid	Apoptosis stimulant
8037	-92.59	cp	BRD-K13169950	NSC-3852	HDAC inhibitor
8033	-92.53	cp	BRD-K68174511	torin-2	MTOR inhibitor
8029	-92.43	cp	BRD-K12102668	nialamide	Monoamine oxidase inhibitor
8024	-92.38	cp	BRD-K99291625	SB-203580	p38 MAPK inhibitor
8021	-92.33	cp	BRD-A75517195	thiazolopyrimidine	CDC inhibitor
8019	-92.32	cp	BRD-K82216340	medroxyprogesterone	progesterone receptor agonist
8020	-92.32	cp	BRD-K81225797	SCH-58261	Adenosine receptor antagonist
8017	-92.3	cp	BRD-A43849199	karakoline	Phytotoxin
8010	-92.22	cp	BRD-K41996876	tyrphostin-1	EGFR inhibitor
8008	-92.19	cp	BRD-K67637637	olopatadine	Histamine receptor antagonist
8004	-92.18	cp	BRD-A19633847	perhexiline	Carnitine palmitoyltransferase inhibitor
8005	-92.18	cp	BRD-K64341947	CFM-1571	Guanylate cyclase activator
7997	-92.1	cp	BRD-A78295502	hydroquinine	Antiarrhythmic
7998	-92.1	cp	BRD-K73196317	urapidil	Adrenergic receptor antagonist
7995	-92.08	cp	BRD-K67506692	tyrphostin-AG-126	ERK1 and ERK2 phosphorylation inhibitor
7996	-92.08	cp	BRD-A91452556	estradiol-cypionate	Estrogen receptor agonist
7990	-92.05	cp	BRD-A16934955	nalbuphine	Opioid receptor agonist
7984	-91.97	cp	BRD-A45498368	WYE-125132	MTOR inhibitor
7981	-91.95	cp	BRD-K72676686	fluvoxamine	Selective serotonin reuptake inhibitor (SSRI)
7978	-91.89	cp	BRD-K97752965	nicorandil	Nitric oxide donor
7973	-91.83	cp	BRD-A01787639	naftopidil	Adrenergic receptor antagonist
7972	-91.82	cp	BRD-K81128206	edrophonium	Acetylcholinesterase inhibitor
7970	-91.79	cp	BRD-K94325918	kinetin-riboside	Apoptosis stimulant
7966	-91.73	cp	BRD-K61691971	avrainvillamide-analog-1	nucleophosmin inhibitor
7967	-91.73	cp	BRD-K68065987	MK-2206	AKT inhibitor
7964	-91.68	cp	BRD-A99571536	dubinidine	Anti-epileptic
7962	-91.63	cp	BRD-A02713983	dihydrodeoxygedunin	Growth factor receptor activator
7959	-91.55	cp	BRD-K81528515	nilotinib	ABL inhibitor
7958	-91.54	cp	BRD-K61250553	loperamide	Opioid receptor agonist
7956	-91.48	cp	BRD-K28912512	nicotinamide	Protein synthesis stimulant
7953	-91.41	cp	BRD-A19248578	latrunculin-b	Actin polymerization inhibitor
7952	-91.29	cp	BRD-K07212038	selinidin	Mast cell stabilizer
7946	-91.21	cp	BRD-K50891186	GR-103691	Dopamine receptor antagonist
7941	-91.14	cp	BRD-K60274257	dephostatin	Tyrosine phosphatase inhibitor
7939	-91.11	cp	BRD-A96882008	L-732138	Tachykinin antagonist
7938	-91.1	cp	BRD-K81839095	estrone	Estrogen receptor agonist
7928	-90.96	cp	BRD-K78084463	W-12	Calmodulin antagonist
7926	-90.9	cp	BRD-K85606544	neratinib	EGFR inhibitor
7923	-90.84	cp	BRD-K79602928	metformin	Insulin sensitizer
7922	-90.72	cp	BRD-K88868628	iodoacetic-acid	Cysteine peptidase inhibitor
7910	-90.57	cp	BRD-K11663430	pyroxamide	HDAC inhibitor
7909	-90.55	cp	BRD-K04466929	Merck60	HDAC inhibitor
7907	-90.51	cp	BRD-K19295594	gossypol	BCL inhibitor
7906	-90.5	cp	BRD-A66435872	HTMT	Histamine receptor agonist
7905	-90.49	cp	BRD-K15935639	z-leu3-VS	Proteasome inhibitor
7903	-90.47	cp	BRD-A14798026	mestranol	Estrogen receptor agonist
7893	-90.26	cp	BRD-K20197062	SA-94315	Caspase inhibitor
7888	-90.17	cp	BRD-K99964838	bosutinib	ABL inhibitor
7875	-89.97	cp	BRD-K40645748	mefloquine	Adenosine receptor antagonist
7871	-89.93	cp	BRD-A11990600	lorazepam	Benzodiazepine receptor agonist
7872	-89.93	cp	BRD-K09485525	GANT-61	GLI antagonist
7866	-89.86	cp	BRD-A81177136	KN-62	Calcium-calmodulin dependent protein kinase inhibitor
7864	-89.85	cp	BRD-K88304388	dextrorphan	Glutamate receptor antagonist
7865	-89.85	cp	BRD-K35573744	erbstatin-analog	EGFR inhibitor
7863	-89.83	cp	BRD-K12906962	dichlorobenzamil	Sodium/calcium exchange inhibitor
7861	-89.82	cp	BRD-K06895174	cisapride	Serotonin receptor agonist
7862	-89.82	cp	BRD-A55484088	BNTX	Opioid receptor antagonist
7850	-89.64	cp	BRD-K71266197	PSB-06126	NTPDase inhibitor
7847	-89.61	cp	BRD-A97730597	hexylcaine	Sodium channel blocker
7846	-89.59	cp	BRD-K87226815	cycloserine	Bacterial cell wall synthesis inhibitor
7844	-89.47	cp	BRD-K59332007	linopirdine	Potassium channel blocker
7842	-89.45	cp	BRD-K97061094	azacyclonol	Histamine receptor antagonist
7840	-89.4	cp	BRD-K28578425	cilostamide	Phosphodiesterase inhibitor
7839	-89.38	cp	BRD-K86204871	terconazole	Sterol demethylase inhibitor
7837	-89.35	cp	BRD-K51677086	erythromycin	NFkB pathway inhibitor
7828	-89.18	cp	BRD-K56047318	RHC-80267	Triacylglycerol lipase inhibitor
7826	-89.13	cp	BRD-K22828899	TUL-XXI039	Serine/threonine kinase inhibitor
7821	-89.09	cp	BRD-K42748308	XE-991	Potassium channel blocker
7822	-89.09	cp	BRD-K82561139	ricinine	Casein kinase inhibitor
7817	-89.03	cp	BRD-K06426971	ryuvidine	Histone lysine methyltransferase inhibitor
7816	-89.02	cp	BRD-K63516691	T-0156	Phosphodiesterase inhibitor
7811	-88.94	cp	BRD-A13807286	HA-14-1	BCL inhibitor
7805	-88.85	cp	BRD-A28970875	puromycin	Protein synthesis inhibitor
7804	-88.83	cp	BRD-K36737713	AG-957	Protein tyrosine kinase inhibitor
7798	-88.72	cp	BRD-A67981824	cefotaxime	Bacterial cell wall synthesis inhibitor
7797	-88.69	cp	BRD-K14765469	vesamicol	Acetylcholinesterase inhibitor
7795	-88.67	cp	BRD-K34820100	tebuthiuron	Photosynthesis inhibitor
7794	-88.66	cp	BRD-A81866333	CGS-21680	Adenosine receptor agonist
7793	-88.65	cp	BRD-K18194590	mephentermine	Adrenergic receptor agonist
7791	-88.59	cp	BRD-K70883034	nimetazepam	GABA receptor agonist
7788	-88.54	cp	BRD-A28105619	cucurbitacin-i	JAK inhibitor
7787	-88.53	cp	BRD-A98431941	ephedrine	Adrenergic receptor agonist
7785	-88.51	cp	BRD-K67868012	PI-103	MTOR inhibitor
7784	-88.49	cp	BRD-K06388322	pramipexole	Dopamine receptor agonist
7781	-88.41	cp	BRD-K94832621	Y-134	Estrogen receptor antagonist
7772	-88.13	cp	BRD-K76587808	fraxetin	Antioxidant
7766	-88.04	cp	BRD-K30296925	flavokavain-b	Antineoplastic
7765	-88.03	cp	BRD-A72066420	mifobate	PPAR receptor antagonist
7763	-88.02	cp	BRD-K73293050	WZ-3146	EGFR inhibitor
7764	-88.02	cp	BRD-K18518344	digitoxigenin	ATPase inhibitor
7761	-87.96	cp	BRD-A35912562	pregnenolone	Glutamate receptor modulator
7757	-87.9	cp	BRD-A17535965	gelsemine	Acetylcholine receptor antagonist
7756	-87.89	cp	BRD-M00539986	formoterol	Adrenergic receptor agonist
7749	-87.8	cp	BRD-U86922168	QL-XII-47	BTK inhibitor
7746	-87.79	cp	BRD-K78659596	MLN-2238	Proteasome inhibitor
7741	-87.75	cp	BRD-K40990712	hexamethyleneamiloride	Sodium/hydrogen antiport inhibitor
7740	-87.74	cp	BRD-K59331372	SB-366791	TRPV antagonist
7735	-87.6	cp	BRD-K10467831	tibolone	Androgen receptor agonist
7732	-87.55	cp	BRD-A96799240	4-hydroxyretinoic-acid	Retinoid receptor binder
7730	-87.48	cp	BRD-K96720755	relcovaptan	Vasopressin receptor antagonist
7726	-87.42	cp	BRD-K91370081	anisomycin	DNA synthesis inhibitor
7727	-87.42	cp	BRD-K59058766	chlorprothixene	Dopamine receptor antagonist
7723	-87.36	cp	BRD-A84189516	baccatin-III	Paclitaxel precursor
7721	-87.34	cp	BRD-K69837166	trap-101	Nociceptin/orphanin FQ (NOP) receptor antagonist
7719	-87.3	cp	BRD-K45330754	diethylstilbestrol	Estrogen receptor agonist
7712	-87.14	cp	BRD-K34437622	BRD-K34437622	Thymidylate synthase inhibitor
7710	-87.07	cp	BRD-K41410256	balsalazide	Cyclooxygenase inhibitor
7706	-86.99	cp	BRD-K45117373	Y-26763	Potassium channel activator
7702	-86.96	cp	BRD-K90259198	W-7	Calmodulin antagonist
7700	-86.91	cp	BRD-K90543092	levonorgestrel	Estrogen receptor agonist
7698	-86.9	cp	BRD-K03406345	azacitidine	DNA methyltransferase inhibitor
7692	-86.83	cp	BRD-K41170226	deoxycholic-acid	G protein-coupled receptor agonist
7681	-86.66	cp	BRD-K50324045	avrainvillamide-analog-6	nucleophosmin inhibitor
7679	-86.65	cp	BRD-A83892713	rifampicin	RNA polymerase inhibitor
7671	-86.43	cp	BRD-K22010301	JLK-6	Gamma secretase inhibitor
7669	-86.36	cp	BRD-K04887706	AKT-inhibitor-1-2	AKT inhibitor
7668	-86.35	cp	BRD-K49049886	CGS-15943	Adenosine receptor antagonist
7667	-86.33	cp	BRD-K33551950	radicicol	HSP inhibitor
7661	-86.18	cp	BRD-A17453586	MDL-72832	Serotonin receptor agonist
7654	-86.14	cp	BRD-A69960130	bromocriptine	Dopamine receptor agonist
7651	-86.1	cp	BRD-A45889380	mepacrine	Cytokine production inhibitor
7650	-86.05	cp	BRD-K04546108	JAK3-inhibitor-VI	JAK inhibitor
7645	-85.93	cp	BRD-A47598013	citalopram	Serotonin reuptake inhibitor
7642	-85.87	cp	BRD-K26674531	GR-235	Estrogen receptor agonist
7643	-85.87	cp	BRD-K86887724	dofetilide	Potassium channel blocker
7640	-85.82	cp	BRD-K64881305	ispinesib	Kinesin-like spindle protein inhibitor
7639	-85.76	cp	BRD-K95676198	JAK3-inhibitor-V	JAK inhibitor
7636	-85.69	cp	BRD-K51290057	SA-792709	Retinoid receptor agonist
7635	-85.68	cp	BRD-K43468059	byssochlamic-acid	Mycotoxin
7629	-85.59	cp	BRD-K92726801	hydrastinine	Haemostatic agent
7630	-85.59	cp	BRD-K82562631	tolmetin	Cyclooxygenase inhibitor
7626	-85.53	cp	BRD-U25771771	WZ-4-145	EGFR inhibitor
7625	-85.51	cp	BRD-A10715913	sulpiride	Dopamine receptor antagonist
7623	-85.49	cp	BRD-K92758126	gibberellic-acid	NFkB pathway inhibitor
7621	-85.46	cp	BRD-K78599730	manumycin-a	Farnesyltransferase inhibitor
7622	-85.46	cp	BRD-K37289225	clozapine	Dopamine receptor antagonist
7618	-85.42	cp	BRD-K52313696	tacedinaline	HDAC inhibitor
7619	-85.42	cp	BRD-K74501079	azithromycin	Bacterial 50S ribosomal subunit inhibitor
7616	-85.39	cp	BRD-K53665955	MK-5108	Aurora kinase inhibitor
7611	-85.29	cp	BRD-K47323024	methapyrilene	Histamine receptor antagonist
7610	-85.25	cp	BRD-K72783841	tyrphostin-AG-555	EGFR inhibitor
7595	-85.05	cp	BRD-A32164164	methyllycaconitine	Acetylcholine receptor antagonist
7594	-84.89	cp	BRD-A80502530	cinobufagin	ATPase inhibitor
7589	-84.82	cp	BRD-A34205397	suloctidil	Adrenergic receptor antagonist
7587	-84.76	cp	BRD-K71926323	marbofloxacin	Bacterial DNA gyrase inhibitor
7584	-84.69	cp	BRD-K13646352	midostaurin	FLT3 inhibitor
7583	-84.68	cp	BRD-K20287671	SU-4312	PDGFR receptor inhibitor
7582	-84.66	cp	BRD-K83972459	JWE-035	Aurora kinase inhibitor
7579	-84.63	cp	BRD-A41301928	bongkrek-acid	Mitochondrial ADP, ATP translocase inhibitor
7577	-84.59	cp	BRD-K20742498	RS-39604	Serotonin receptor antagonist
7571	-84.47	cp	BRD-A22713669	BVT-948	Tyrosine phosphatase inhibitor
7567	-84.39	cp	BRD-K19227686	phenolphthalein	Indicator dye
7565	-84.25	cp	BRD-K41337261	ZM-306416	ABL inhibitor
7556	-84.01	cp	BRD-K21806131	tegaserod	Serotonin receptor partial agonist
7554	-83.96	cp	BRD-A18763547	BAX-channel-blocker	Cytochrome C release inhibitor
7552	-83.94	cp	BRD-K22031190	diflunisal	Prostanoid receptor antagonist
7548	-83.89	cp	BRD-K67352070	TC-2559	Acetylcholine receptor agonist
7546	-83.87	cp	BRD-A13188892	doxazosin	Adrenergic receptor antagonist
7543	-83.83	cp	BRD-K73319509	PF-04217903	c-Met inhibitor
7537	-83.73	cp	BRD-K46469693	SCH-442416	Adenosine receptor antagonist
7536	-83.63	cp	BRD-K77908580	entinostat	HDAC inhibitor
7535	-83.62	cp	BRD-K17110974	aristolochic-acid	Phospholipase inhibitor
7532	-83.56	cp	BRD-K06750613	GSK-1059615	PI3K inhibitor
7533	-83.56	cp	BRD-K91290917	amodiaquine	Histamine receptor agonist
7529	-83.55	cp	BRD-K23383398	T-0901317	LXR agonist
7530	-83.55	cp	BRD-K29555132	arachidonamide	Cannabinoid receptor agonist
7522	-83.32	cp	BRD-A74980173	gatifloxacin	Bacterial DNA gyrase inhibitor
7521	-83.27	cp	BRD-K35458079	edaravone	Nootropic agent
7519	-83.24	cp	BRD-K16406336	methylene-blue	Guanylyl cyclase inhibitor
7518	-83.23	cp	BRD-K35960502	niclosamide	DNA replication inhibitor
7517	-83.21	cp	BRD-A89434049	sarmentogenin	ATPase inhibitor
7516	-83.12	cp	BRD-K09471561	levofloxacin	Bacterial DNA gyrase inhibitor
7514	-83.11	cp	BRD-K61829047	7b-cis	Exportin antagonist
7512	-83.03	cp	BRD-K32828673	chelidonine	Tubulin inhibitor
7507	-82.99	cp	BRD-K11911061	GR-127935	Serotonin receptor antagonist
7506	-82.98	cp	BRD-K66296774	fluvastatin	HMGCR inhibitor
7504	-82.96	cp	BRD-K69600043	thiethylperazine	Dopamine receptor antagonist
7501	-82.91	cp	BRD-K39462424	dexchlorpheniramine	Histamine receptor antagonist
7495	-82.72	cp	BRD-K81847782	scandenin	Plant compound with antimicrobial activity
7494	-82.7	cp	BRD-K14696368	9-methyl-5H-6-thia-4,5-diaza-chrysene-6,6-dioxide	NFkB pathway inhibitor
7490	-82.67	cp	BRD-A18917088	estradiol	Contraceptive agent
7489	-82.64	cp	BRD-K36740062	GSK-1070916	Aurora kinase inhibitor
7487	-82.62	cp	BRD-K02130563	panobinostat	HDAC inhibitor
7477	-82.37	cp	BRD-A50311610	meclozine	CAR agonist
7471	-82.3	cp	BRD-K77175907	calcifediol	Vitamin D receptor agonist
7467	-82.23	cp	BRD-K70281171	U-99194	Dopamine receptor antagonist
7463	-82.21	cp	BRD-A63667919	methylergometrine	Dopamine receptor antagonist
7462	-82.18	cp	BRD-A55946879	BW-B70C	Lipoxygenase inhibitor
7457	-82	cp	BRD-K90976994	dehydrocholic-acid	Bile acid
7454	-81.92	cp	BRD-K49372556	mofezolac	Cyclooxygenase inhibitor
7451	-81.88	cp	BRD-A30437061	camptothecin	Topoisomerase inhibitor
7446	-81.79	cp	BRD-K13664374	dichloroacetic-acid	Pyruvate dehydrogenase kinase inhibitor
7441	-81.64	cp	BRD-K11801786	trimidox	Ribonucleotide reductase inhibitor
7440	-81.58	cp	BRD-K15025317	BAY-11-7821	NFkB pathway inhibitor
7437	-81.49	cp	BRD-K96778649	tyrphostin-47	EGFR inhibitor
7431	-81.4	cp	BRD-K03642198	AY-9944	Hedgehog pathway modulator
7416	-81.24	cp	BRD-A37817666	picrotoxin	GABA receptor antagonist
7415	-81.18	cp	BRD-K98684188	GSK-0660	PPAR receptor antagonist
7412	-81.13	cp	BRD-A78360835	cercosporin	Photoactivated toxin
7410	-81.11	cp	BRD-K56064827	EI-273	PKC inhibitor
7408	-80.99	cp	BRD-K34098590	tienilic-acid	Sodium/potassium/chloride transporter inhibitor
7405	-80.96	cp	BRD-K60690191	MPEP	Glutamate receptor antagonist
7406	-80.96	cp	BRD-K15715913	fluperlapine	Serotonin receptor antagonist
7398	-80.85	cp	BRD-K86958018	olvanil	TRPV agonist
7396	-80.84	cp	BRD-A68888262	azelastine	Histamine receptor antagonist
7395	-80.82	cp	BRD-K98157055	SIB-1757	Glutamate receptor antagonist
7382	-80.55	cp	BRD-K57546357	prunetin	Breast cancer resistance protein inhibitor
7381	-80.46	cp	BRD-A13946108	sulindac	Cyclooxygenase inhibitor
7378	-80.45	cp	BRD-K70505054	ranitidine	Histamine receptor antagonist
7373	-80.29	cp	BRD-A92161634	scopoline	Acetylcholine receptor antagonist
7371	-80.25	cp	BRD-K43068349	AMG-9810	TRPV antagonist
7366	-80.15	cp	BRD-K46742498	alosetron	Serotonin receptor antagonist
7362	-80.06	cp	BRD-K64517075	heliomycin	ATP synthase inhibitor
7356	-79.98	cp	BRD-A44448661	pentobarbital	Barbiturate antiepileptic
7349	-79.72	cp	BRD-K06147391	telenzepine	Acetylcholine receptor antagonist
7339	-79.62	cp	BRD-K72034655	peucedanin	Apoptosis stimulant
7338	-79.6	cp	BRD-K54330070	SB-202190	p38 MAPK inhibitor
7337	-79.59	cp	BRD-A74907996	equol	Estrogen receptor agonist
7330	-79.48	cp	BRD-K13049116	BMS-754807	IGF-1 inhibitor
7327	-79.39	cp	BRD-K57718010	pentylenetetrazol	GABA receptor antagonist
7323	-79.28	cp	BRD-K10176267	L-701252	Glutamate receptor antagonist
7322	-79.25	cp	BRD-K21672174	RO-28-1675	Glucokinase activator
7311	-79.01	cp	BRD-A15914070	4-hydroxy-2-nonenal	Cytotoxic lipid peroxidation product
7310	-78.99	cp	BRD-K23204545	busulfan	DNA inhibitor
7304	-78.94	cp	BRD-A36471396	biperiden	Acetylcholine receptor antagonist
7291	-78.63	cp	BRD-K78692225	leflunomide	Dihydroorotate dehydrogenase inhibitor
7289	-78.61	cp	BRD-K63675182	triflupromazine	Dopamine receptor antagonist
7285	-78.55	cp	BRD-K96263742	GW-7647	PPAR receptor agonist
7282	-78.52	cp	BRD-K50836978	purvalanol-a	CDK inhibitor
7278	-78.47	cp	BRD-K47936004	piribedil	Dopamine receptor agonist
7273	-78.43	cp	BRD-A11813248	AM-92016	Potassium channel blocker
7270	-78.37	cp	BRD-A63043573	cabergoline	Dopamine receptor agonist
7271	-78.37	cp	BRD-K15834839	lobendazole	Anthelmintic
7269	-78.36	cp	BRD-K87990216	piretanide	Glucocorticoid receptor agonist
7268	-78.35	cp	BRD-K42573370	avrainvillamide-analog-2	nucleophosmin inhibitor
7267	-78.31	cp	BRD-K05181463	L-741626	Dopamine receptor antagonist
7265	-78.29	cp	BRD-K50660797	epicatechin	Bacterial DNA gyrase inhibitor
7263	-78.24	cp	BRD-K32536677	AGK-2	SIRT inhibitor
7258	-78.18	cp	BRD-K10177585	PSB-11	Adenosine receptor antagonist
7256	-78.15	cp	BRD-K44353683	nateglinide	Insulin secretagogue
7251	-78.04	cp	BRD-K60174629	z-prolyl-prolinal	Prolyl endopeptidase inhibitor
7250	-78.02	cp	BRD-K31633810	DAU-5884	Acetylcholine receptor antagonist
7243	-77.88	cp	BRD-A69917777	aminopentamide	Acetylcholine receptor antagonist
7241	-77.85	cp	BRD-K70490179	rimcazole	Sigma receptor antagonist
7240	-77.82	cp	BRD-K42500029	CGP-57380	MAP kinase inhibitor
7239	-77.81	cp	BRD-A20697603	thiostrepton	FOXM1 inhibitor
7238	-77.8	cp	BRD-A26097136	bulleyaconitine-a	Non-opiod analgesic
7231	-77.68	cp	BRD-K62289640	lylamine	Cannabinoid receptor agonist
7230	-77.64	cp	BRD-K86930074	cediranib	KIT inhibitor
7224	-77.55	cp	BRD-K19284129	salvinorin-a	Opioid receptor agonist
7223	-77.51	cp	BRD-K05737787	isoeugenol	Nitric oxide production inhibitor
7214	-77.36	cp	BRD-K90733503	cefalexin	Bacterial cell wall synthesis inhibitor
7211	-77.31	cp	BRD-K06854232	AM-580	Retinoid receptor agonist
7205	-77.24	cp	BRD-A75935363	atracurium	Acetylcholine receptor antagonist
7206	-77.24	cp	BRD-K08219523	5-nonyloxytryptamine	Serotonin receptor agonist
7203	-77.22	cp	BRD-A43082555	loxoprofen	Cyclooxygenase inhibitor
7193	-77.16	cp	BRD-K48935217	epothilone	Microtubule inhibitor
7194	-77.16	cp	BRD-K54233340	dorsomorphin	AMPK inhibitor
7190	-77.1	cp	BRD-K50388907	fenofibrate	PPAR receptor agonist
7189	-77.09	cp	BRD-K18909381	CGS-12066B	Serotonin receptor agonist
7188	-77.08	cp	BRD-A94413429	NTNCB	Neuropeptide receptor antagonist
7183	-76.98	cp	BRD-K06080977	eicosatetraynoic-acid	Cyclooxygenase inhibitor
7179	-76.94	cp	BRD-K97309399	thiothixene	Dopamine receptor antagonist
7178	-76.92	cp	BRD-K15196155	IBC-293	Hydroxycarboxylic acid receptor agonist
7176	-76.83	cp	BRD-K63068307	ZSTK-474	PI3K inhibitor
7165	-76.58	cp	BRD-A16754160	ampicillin	Bacterial cell wall synthesis inhibitor
7158	-76.43	cp	BRD-K52394958	GR-159897	Tachykinin antagonist
7147	-76.13	cp	BRD-K78431006	crizotinib	ALK inhibitor
7140	-76	cp	BRD-K30020243	aliskiren	Antihypertensive
7137	-75.96	cp	BRD-K56403959	ZK-756326	CC chemokine receptor ligand
7134	-75.9	cp	BRD-K70487031	flupentixol	Dopamine receptor antagonist
7133	-75.89	cp	BRD-K43290182	Ro-04-6790	Serotonin receptor antagonist
7132	-75.87	cp	BRD-K87919739	tyrphostin-AG-825	Receptor tyrosine protein kinase inhibitor
7131	-75.85	cp	BRD-K55344148	BU-224	Imidazoline receptor ligand
7128	-75.74	cp	BRD-K15842202	eudesmic-acid	-666
7125	-75.66	cp	BRD-A58564983	selamectin	Nematocide
7119	-75.58	cp	BRD-A31521121	methocarbamol	Muscle relaxant
7118	-75.57	cp	BRD-K78294846	osthol	Calcium channel blocker
7114	-75.5	cp	BRD-A25569250	KI-16425	Lysophosphatidic acid receptor antagonist
7111	-75.43	cp	BRD-K63606607	bufalin	ATPase inhibitor
7110	-75.39	cp	BRD-A71657825	2-(biphenyl-4-ylsulfonamido)pentanedioic-acid	Matrix metalloprotease inhibitor
7103	-75.24	cp	BRD-K08115555	tyrphostin-AG-1288	TNF production inhibitor
7102	-75.21	cp	BRD-K29313308	HDAC3-selective	HDAC inhibitor
7100	-75.16	cp	BRD-K95435023	PHA-665752	c-Met inhibitor
7094	-75.07	cp	BRD-K15601958	SEW-2871	Lysophospholipid receptor agonist
7084	-74.94	cp	BRD-K03600606	catechin	Beta secretase inhibitor
7076	-74.79	cp	BRD-A05186015	bupropion	Dopamine uptake inhibitor
7077	-74.79	cp	BRD-A25234499	aminoglutethimide	Glucocorticoid receptor antagonist
7075	-74.75	cp	BRD-A65076780	dihydroergocristine	Adrenergic receptor antagonist
7069	-74.54	cp	BRD-A20126139	medrysone	Glucocorticoid receptor agonist
7068	-74.48	cp	BRD-K59773493	benzohydroxamic-acid	Antifungal
7065	-74.4	cp	BRD-A97739905	ketoprofen	Cyclooxygenase inhibitor
7064	-74.39	cp	BRD-K34581968	BMS-536924	IGF-1 inhibitor
7044	-74.01	cp	BRD-K32164935	tolazamide	ATP channel blocker
7041	-73.94	cp	BRD-K52522949	NCH-51	HDAC inhibitor
7040	-73.9	cp	BRD-A09925278	etilefrine	Adrenergic receptor agonist
7036	-73.78	cp	BRD-K33572481	taurodeoxycholic-acid	Bile acid
7029	-73.69	cp	BRD-A10070317	propranolol	Adrenergic receptor antagonist
7030	-73.69	cp	BRD-A39747742	estradiol-valerate	Estrogen receptor agonist
7028	-73.68	cp	BRD-A45140972	meclocycline	Bacterial 30S ribosomal subunit inhibitor
7027	-73.67	cp	BRD-K84595254	strophanthidin	ATPase inhibitor
7022	-73.58	cp	BRD-K45988865	tetramethylsilane	Internal standard for NMR spectroscopy
7020	-73.56	cp	BRD-K36009368	NNC-63-0532	Opioid receptor agonist
7016	-73.5	cp	BRD-K68437527	EMF-bca1-60	caspase inhibitor
7012	-73.46	cp	BRD-K08996725	zolantidine	Histamine receptor antagonist
7007	-73.27	cp	BRD-K94176593	TWS-119	Glycogen synthase kinase inhibitor
6999	-73.17	cp	BRD-K66175015	afatinib	EGFR inhibitor
6997	-73.12	cp	BRD-K63504947	semaxanib	VEGFR inhibitor
6996	-73.08	cp	BRD-K28143534	cyproheptadine	Histamine receptor antagonist
6993	-73.04	cp	BRD-K96037667	norethindrone	Progesterone receptor agonist
6992	-73.02	cp	BRD-A52660433	tetrindole	Monoamine oxidase inhibitor
6989	-72.9	cp	BRD-K72895815	SSR-69071	Leukocyte elastase inhibitor
6987	-72.73	cp	BRD-K13927029	retinol	Retinoid receptor ligand
6985	-72.7	cp	BRD-K22878149	SB-205607	Delta 1 opioid receptor agonist
6981	-72.64	cp	BRD-K39391626	ethylestrenol	Progesterone receptor agonist
6979	-72.6	cp	BRD-K09549677	mibefradil	T-type calcium channel blocker
6977	-72.55	cp	BRD-K78122587	NNC-55-0396	T-type calcium channel blocker
6972	-72.49	cp	BRD-K74305673	IKK-2-inhibitor-V	IKK inhibitor
6969	-72.41	cp	BRD-A24191444	ifenprodil	Adrenergic receptor antagonist
6964	-72.24	cp	BRD-K18855837	varenicline	Acetylcholine receptor agonist
6963	-72.2	cp	BRD-K50398167	meclofenamic-acid	Cyclooxygenase inhibitor
6959	-72.15	cp	BRD-K03109492	NSC-663284	CDC inhibitor
6957	-72.09	cp	BRD-K36198571	WAY-170523	Metalloproteinase inhibitor
6955	-72.07	cp	BRD-K78373679	RO-3306	CDK inhibitor
6951	-72	cp	BRD-K19796430	erismodegib	Smoothened receptor antagonist
6950	-71.98	cp	BRD-A64933752	CV-1808	Adenosine receptor agonist
6949	-71.97	cp	BRD-K50422030	clomethiazole	GABA receptor antagonist
6947	-71.85	cp	BRD-K53737926	amitriptyline	Norepinephrine inhibitor
6939	-71.65	cp	BRD-A44551378	LFM-A12	EGFR inhibitor
6937	-71.56	cp	BRD-K49111258	prazosin	Adrenergic receptor antagonist
6934	-71.52	cp	BRD-A47706533	L-BSO	Glutathione transferase inhibitor
6931	-71.36	cp	BRD-K67844266	MLN-4924	Nedd activating enzyme inhibitor
6925	-71.31	cp	BRD-K42221274	NNC-711	GAT inhibitor
6924	-71.29	cp	BRD-K96799727	pifithrin-mu	HSP inhibitor
6922	-71.24	cp	BRD-K17497770	butein	EGFR inhibitor
6920	-71.22	cp	BRD-K83988098	alvespimycin	HSP inhibitor
6916	-71.12	cp	BRD-K66874953	pifithrin-alpha	TP53 inhibitor
6911	-71.05	cp	BRD-K67847053	guanabenz	Adrenergic receptor agonist
6903	-70.95	cp	BRD-K78485176	olmesartan	Angiotensin receptor antagonist
6901	-70.89	cp	BRD-K08554278	bisbenzimide	DNA binding agent
6894	-70.77	cp	BRD-K80451230	zamifenacin	Acetylcholine receptor antagonist
6893	-70.76	cp	BRD-K13261168	LY-16350	Dopamine receptor agonist
6884	-70.53	cp	BRD-A29082194	gitoxigenin	ATPase inhibitor
6883	-70.52	cp	BRD-K28907958	CD-437	Retinoid receptor agonist
6882	-70.49	cp	BRD-K77987382	mebendazole	Tubulin inhibitor
6870	-70.26	cp	BRD-K59753853	MDL-29951	Glutamate receptor antagonist
6867	-70.24	cp	BRD-K87049188	fusaric-acid	Dopamine beta hydroxylase inhibitor
6866	-70.23	cp	BRD-K94887716	TFMPP	Serotonin receptor agonist
6854	-69.89	cp	BRD-K09132007	D-4476	TGF beta receptor inhibitor
6851	-69.84	cp	BRD-A49160188	donepezil	Acetylcholinesterase inhibitor
6840	-69.64	cp	BRD-K54316499	tolterodine	Acetylcholine receptor antagonist
6835	-69.59	cp	BRD-K69195780	NAN-190	Serotonin receptor agonist
6833	-69.54	cp	BRD-K32645441	dipropyl-5ct	Serotonin receptor agonist
6824	-69.41	cp	BRD-K88625236	nonoxynol-9	Membrane integrity inhibitor
6825	-69.41	cp	BRD-K01292756	pimozide	Dopamine receptor antagonist
6823	-69.4	cp	BRD-K72541103	JAK3-inhibitor-I	JAK inhibitor
6819	-69.34	cp	BRD-K97365803	PI-828	PI3K inhibitor
6816	-69.3	cp	BRD-K32744045	disulfiram	Aldehyde dehydrogenase inhibitor
6812	-69.21	cp	BRD-A75478957	PD-166793	Metalloproteinase inhibitor
6809	-69.06	cp	BRD-A68281735	REV-5901	Leukotriene receptor antagonist
6807	-69.04	cp	BRD-K36153907	KU-C103885	Cystic fibrosis transmembrane conductance regulator inhibitor
6808	-69.04	cp	BRD-K80970344	pyrrolidine-dithiocarbamate	NFkB pathway inhibitor
6805	-68.98	cp	BRD-K33459542	ditolylguanidine	Sigma receptor agonist
6802	-68.91	cp	BRD-A11007541	BCI-hydrochloride	Protein phosphatase inhibitor
6798	-68.84	cp	BRD-A84327315	calcitriol	Vitamin D receptor agonist
6792	-68.69	cp	BRD-K46441700	GR-55562	Serotonin receptor antagonist
6789	-68.64	cp	BRD-K88679075	methandriol	Androgenic steroid
6787	-68.62	cp	BRD-K08640512	RS-100329	Adrenergic receptor antagonist
6788	-68.62	cp	BRD-A85025557	NCS-382	GABA receptor antagonist
6781	-68.52	cp	BRD-K64890080	BI-2536	PLK inhibitor
6777	-68.46	cp	BRD-K18779551	bifemelane	Acetylcholine release stimulant
6776	-68.44	cp	BRD-K78838262	austricine	Hypolipidemic
6774	-68.4	cp	BRD-K14536225	piceid	Glucosidase inhibitor
6773	-68.38	cp	BRD-K06593056	LE-135	Retinoid receptor agonist
6766	-68.21	cp	BRD-A20968261	WAY-213613	Glutamate inhibitor
6759	-68.11	cp	BRD-A64297288	amlodipine	Calcium channel blocker
6760	-68.11	cp	BRD-K95992530	Cyclo-[Arg-Gly-Asp-D-Phe-Val]	integrin antagonist
6756	-68.07	cp	BRD-K14618467	IKK-16	IKK inhibitor
6757	-68.07	cp	BRD-A93206962	L-755507	Adrenergic receptor agonist
6758	-68.07	cp	BRD-K94294671	OSI-027	MTOR inhibitor
6755	-68.04	cp	BRD-K30743633	TCPOBOP	CAR agonist
6752	-68.03	cp	BRD-K99946902	hexylresorcinol	Local anesthetic
6750	-68.01	cp	BRD-K91904471	SD-169	p38 MAPK inhibitor
6747	-67.98	cp	BRD-A41450521	tosufloxacin	Bacterial DNA gyrase inhibitor
6740	-67.88	cp	BRD-K29950728	clomifene	Estrogen receptor antagonist
6734	-67.7	cp	BRD-A75455249	kavain	Calcium channel modulator
6733	-67.69	cp	BRD-K96402602	farnesylthiotriazole	PPMTase inhibitor
6731	-67.65	cp	BRD-K64157027	ZD-2079	Adrenergic receptor agonist
6728	-67.59	cp	BRD-A88254928	salbutamol	Adrenergic receptor agonist
6725	-67.56	cp	BRD-K62736196	guanabenz	-666
6720	-67.51	cp	BRD-K25186396	tangeritin	Cell cycle inhibitor
6715	-67.44	cp	BRD-K06014311	DH-97	Melatonin receptor antagonist
6714	-67.36	cp	BRD-K44497846	enalapril	ACE inhibitor
6712	-67.34	cp	BRD-K71512533	SNS-314	Aurora kinase inhibitor
6708	-67.28	cp	BRD-K49294207	BIBU-1361	EGFR inhibitor
6709	-67.28	cp	BRD-A31159102	fluoxetine	Selective serotonin reuptake inhibitor (SSRI)
6706	-67.21	cp	BRD-K30649484	mafenide	Carbonic anhydrase inhibitor
6703	-67.11	cp	BRD-K07736136	VX-702	p38 MAPK inhibitor
6699	-67.02	cp	BRD-A26334849	propafenone	Antiarrhythmic
6694	-66.82	cp	BRD-K08417745	SID-26681509	Cathepsin inhibitor
6685	-66.64	cp	BRD-K11853856	PJ-34	PARP inhibitor
6675	-66.44	cp	BRD-K13571841	pepstatin	Aspartic protease inhibitor
6676	-66.44	cp	BRD-K56001384	antimycin-a	ATP synthase inhibitor
6674	-66.39	cp	BRD-A24543851	nornicotine	Acetylcholine receptor agonist
6673	-66.37	cp	BRD-K96809896	SKF-86002	p38 MAPK inhibitor
6672	-66.34	cp	BRD-A86044036	flurbiprofen	Cyclooxygenase inhibitor
6670	-66.27	cp	BRD-K63913457	eicosatrienoic-acid	Vasodilator
6669	-66.24	cp	BRD-K68488863	ENMD-2076	FLT3 inhibitor
6667	-66.19	cp	BRD-K16336526	capsaicin	TRPV agonist
6668	-66.19	cp	BRD-K97863768	prothionamide	Mycobacterium tuberculosis enoyl-[acyl-carrier-protein] reductase [NADH] (inhA) inhibitor
6666	-66.17	cp	BRD-K47539947	tetradecylthioacetic-acid	Lipid peroxidase inhibitor
6665	-66.16	cp	BRD-K87158025	benzamil	Sodium channel blocker
6663	-66.11	cp	BRD-K52397688	amperozide	Dopamine receptor antagonist
6659	-66.03	cp	BRD-A94709349	metaxalone	Muscle relaxant
6658	-66.01	cp	BRD-K46424862	hymecromone	Monoamine oxidase inhibitor
6649	-65.96	cp	BRD-K37814297	acepromazine	Dopamine receptor antagonist
6646	-65.9	cp	BRD-M72442222	vicriviroc	CC chemokine receptor antagonist
6647	-65.9	cp	BRD-K26669427	WR-216174	PFMRK inhibitor
6648	-65.9	cp	BRD-K76872913	benzanthrone	Aromatic hydrocarbon derivative
6645	-65.81	cp	BRD-K51541829	RO-25-6981	Ionotropic glutamate receptor antagonist
6638	-65.75	cp	BRD-K38197229	bumetanide	Solute carrier family member inhibitor
6636	-65.74	cp	BRD-A51182606	chloramphenicol	Protein synthesis inhibitor
6635	-65.72	cp	BRD-K94689771	pinocembrin	CYP1B1 inhibitor
6633	-65.64	cp	BRD-A16478930	amcinonide	Glucocorticoid receptor agonist
6624	-65.46	cp	BRD-K37194137	III606050	Cytochrome P450 inhibitor
6620	-65.41	cp	BRD-K26134695	calpeptin	Calpain inhibitor
6617	-65.4	cp	BRD-A22256192	terazosin	Adrenergic receptor antagonist
6614	-65.36	cp	BRD-K20655524	mefexamide	Psychoactive drug
6613	-65.34	cp	BRD-K05181084	NGB-2904	Dopamine receptor antagonist
6611	-65.3	cp	BRD-K01436366	XMD-1150	Leucine rich repeat kinase inhibitor
6608	-65.26	cp	BRD-K13642330	cosmosiin	Cytochrome P450 inhibitor
6605	-65.24	cp	BRD-K70401845	erlotinib	EGFR inhibitor
6604	-65.22	cp	BRD-K21283037	riluzole	Glutamate inhibitor
6603	-65.19	cp	BRD-K20285085	fostamatinib	SYK inhibitor
6598	-65.12	cp	BRD-K21853356	RG-14620	EGFR inhibitor
6597	-65.09	cp	BRD-K63915849	AS-604850	PI3K inhibitor
6592	-64.85	cp	BRD-A49046702	SKF-89976A	GABA uptake inhibitor
6591	-64.84	cp	BRD-K75699339	rizatriptan	Serotonin receptor agonist
6589	-64.81	cp	BRD-K63165456	norcyclobenzaprine	Adrenergic receptor agonist
6584	-64.67	cp	BRD-U66370498	androstanol	CAR antagonist
6576	-64.54	cp	BRD-K51671335	sulpiride	Dopamine receptor antagonist
6573	-64.45	cp	BRD-A93236127	digitoxin	ATPase inhibitor
6568	-64.34	cp	BRD-K37206356	rhamnetin	HDAC inhibitor
6565	-64.22	cp	BRD-A15010982	HU-211	Glutamate receptor antagonist
6563	-64.2	cp	BRD-A19661776	mianserin	Serotonin receptor antagonist
6561	-64.16	cp	BRD-K67439147	SIB-1893	Glutamate receptor antagonist
6562	-64.16	cp	BRD-K82036761	sertraline	Serotonin receptor antagonist
6550	-64	cp	BRD-K49671696	ketanserin	Serotonin receptor antagonist
6549	-63.98	cp	BRD-A82656074	naltrindole	Opioid receptor antagonist
6548	-63.95	cp	BRD-A14966924	alaproclate	Serotonin receptor antagonist
6546	-63.91	cp	BRD-K59256312	gabexate	Serine protease inhibitor
6543	-63.84	cp	BRD-K37561857	zardaverine	Phosphodiesterase inhibitor
6542	-63.81	cp	BRD-K55191674	benzylpenicillin	Penicillin binding protein inhibitor
6541	-63.8	cp	BRD-K16195444	oxymetazoline	Adrenergic receptor agonist
6538	-63.72	cp	BRD-U08759356	EI-346-erlotinib-analog	EGFR inhibitor
6528	-63.56	cp	BRD-A89337244	PD-102807	Acetylcholine receptor antagonist
6525	-63.5	cp	BRD-K25224017	pirenperone	Serotonin receptor antagonist
6518	-63.3	cp	BRD-K69688083	mestinon	Cholinesterase inhibitor
6519	-63.3	cp	BRD-A06726973	dibutyrylcyclic-gmp	cGMP analog
6517	-63.29	cp	BRD-K27450477	EHNA	Adenosine deaminase inhibitor
6516	-63.22	cp	BRD-A81772229	simvastatin	HMGCR inhibitor
6511	-63.16	cp	BRD-K40175214	torin-1	MTOR inhibitor
6508	-63.13	cp	BRD-K20995441	U-54494A	Opioid receptor agonist
6506	-63.07	cp	BRD-K92413528	thiazolidinecarboxylic-acid	Reducing agent
6505	-63.06	cp	BRD-K51967704	BIIB021	HSP inhibitor
6504	-63.05	cp	BRD-A27554692	altrenogest	Progestogen hormone
6501	-63.03	cp	BRD-A62035778	scopolamine	Acetylcholine receptor antagonist
6498	-62.89	cp	BRD-K96119599	leucodin	Melanin inhibitor
6494	-62.79	cp	BRD-A85234536	N6-cyclopentyladenosine	Adenosine receptor agonist
6490	-62.68	cp	BRD-K81272440	dantrolene	Calcium channel blocker
6481	-62.51	cp	BRD-K69556541	ryanodine	Calcium channel blocker
6472	-62.36	cp	BRD-K60038276	irbesartan	Angiotensin receptor antagonist
6470	-62.34	cp	BRD-A55913614	primaquine	Antimalarial
6466	-62.25	cp	BRD-K80639402	SB-258585	Serotonin receptor antagonist
6452	-62.04	cp	BRD-K12260308	xanthoxyline	Antifungal
6448	-61.88	cp	BRD-K15086322	JNJ-10191584	Histamine receptor antagonist
6447	-61.86	cp	BRD-K70914287	BIBX-1382	EGFR inhibitor
6445	-61.84	cp	BRD-A80213327	NSC-23766	Ras GTPase inhibitor
6443	-61.78	cp	BRD-A95445494	maackiain	Sodium/glucose cotransporter inhibitor
6438	-61.71	cp	BRD-K41868777	W-5	Calmodulin antagonist
6432	-61.41	cp	BRD-K18619710	digoxigenin	Steroid
6429	-61.27	cp	BRD-K76810206	nicergoline	Adrenergic receptor antagonist
6428	-61.24	cp	BRD-A10977446	carvedilol	Adrenergic receptor antagonist
6424	-61.18	cp	BRD-K86595100	chlordiazepoxide	Benzodiazepine receptor agonist
6423	-61.14	cp	BRD-A09495397	bicuculline	GABA receptor antagonist
6418	-60.95	cp	BRD-K70881766	solanine	Acetylcholinesterase inhibitor
6417	-60.94	cp	BRD-K56115039	BU-226	Imidazoline receptor ligand
6414	-60.88	cp	BRD-K52911425	GDC-0941	PI3K inhibitor
6411	-60.79	cp	BRD-A95096829	PNU-96415E	Dopamine receptor antagonist
6403	-60.62	cp	BRD-A55369275	CGP-54626	GABA receptor antagonist
6399	-60.58	cp	BRD-K52219182	BRD-K52219182	Phosphodiesterase inhibitor
6396	-60.53	cp	BRD-K48722258	dilazep	Adenosine reuptake inhibitor
6395	-60.47	cp	BRD-A29734509	disopyramide	Sodium channel blocker
6390	-60.39	cp	BRD-K48115423	2-(4-methoxybenzylthio)-6-methylpyrimidin-4-ol	Matrix metalloprotease inhibitor
6388	-60.37	cp	BRD-K13810148	givinostat	HDAC inhibitor
6389	-60.37	cp	BRD-K94144010	cotinine	Nicotine metabolite
6385	-60.35	cp	BRD-K02950022	BMS-299897	Gamma secretase inhibitor
6384	-60.34	cp	BRD-K82823804	SA-792987	PKC inhibitor
6383	-60.3	cp	BRD-K10705233	GW-405833	Cannabinoid receptor agonist
6382	-60.26	cp	BRD-K67860401	AR-A014418	Glycogen synthase kinase inhibitor
6381	-60.22	cp	BRD-K97158071	droperidol	Dopamine receptor antagonist
6378	-60.14	cp	BRD-K24201553	SB-269970	Serotonin receptor antagonist
6376	-60	cp	BRD-A64227845	SKF-77434	Dopamine receptor agonist
6375	-59.98	cp	BRD-A80574334	oxalomalic-acid	Isocitrate dehydrogenase inhibitor
6373	-59.95	cp	BRD-K20141153	atomoxetine	Norepinephrine transporter inhibitor
6369	-59.9	cp	BRD-K41707108	ceramide	Phosphoenolpyruvate carboxylase activator
6371	-59.9	cp	BRD-K62810658	PD-98059	MEK inhibitor
6367	-59.87	cp	BRD-K05528470	L-745870	Dopamine receptor antagonist
6362	-59.77	cp	BRD-K44442813	pidotimod	Interferon receptor agonist
6359	-59.7	cp	BRD-A97674275	ranolazine	Sodium channel blocker
6356	-59.68	cp	BRD-K95763993	trapidil	PDGFR receptor inhibitor
6357	-59.68	cp	BRD-K02581333	protein-tyrosine-phosphatase-inhibitor-IV	Tyrosine phosphatase inhibitor
6354	-59.63	cp	BRD-K51816706	oxindole-I	VEGFR inhibitor
6353	-59.6	cp	BRD-A39230911	chlorphensin	Muscle relaxant
6346	-59.49	cp	BRD-K08619574	thioproperazine	Dopamine receptor antagonist
6330	-59.14	cp	BRD-A72988804	tiaprofenic-acid	Cyclooxygenase inhibitor
6328	-59.11	cp	BRD-A72758037	asiatic-acid	Apoptosis stimulant
6325	-58.98	cp	BRD-A43940795	tetrahydropalmatine	Serotonin release inhibitor
6324	-58.96	cp	BRD-K94919853	10H-phenothiazin-10-yl)(p-tolyl)methanone	Butyrylcholinesterase inhibitor
6318	-58.74	cp	BRD-K09499853	KU-0060648	DNA dependent protein kinase inhibitor
6314	-58.61	cp	BRD-A32161980	carbetocin	Oxytocin receptor agonist
6313	-58.59	cp	BRD-K31283835	tofacitinib	JAK inhibitor
6308	-58.49	cp	BRD-A43882281	pinacidil	ATP channel activator
6305	-58.44	cp	BRD-K25504083	cytochalasin-d	Actin polymerization inhibitor
6304	-58.41	cp	BRD-K28806945	L-750667	Dopamine receptor antagonist
6297	-58.29	cp	BRD-A09722536	cyclophosphamide	DNA alkylating agent
6296	-58.28	cp	BRD-K48029790	OBAA	Phospholipase inhibitor
6295	-58.25	cp	BRD-K51662849	ilomastat	Matrix metalloprotease inhibitor
6293	-58.2	cp	BRD-K92870997	pterostilbene	Cyclooxygenase inhibitor
6291	-58.16	cp	BRD-A11678676	wortmannin	PI3K inhibitor
6287	-58.08	cp	BRD-M86331534	pyrvinium-pamoate	AKT inhibitor
6288	-58.08	cp	BRD-A93477898	PETCM	Caspase activator
6284	-58.05	cp	BRD-K59574735	ubenimex	Leukotriene inhibitor
6283	-58.04	cp	BRD-A85587465	bemesetron	Serotonin receptor antagonist
6281	-58	cp	BRD-A02367930	ethinyl-estradiol	DNA directed DNA polymerase stimulant
6276	-57.97	cp	BRD-K01095011	finasteride	5-alpha reductase inhibitor
6274	-57.96	cp	BRD-K70330367	amantadine	Glutamate receptor antagonist
6271	-57.94	cp	BRD-K44432556	VU-0418946-1	HIF modulator
6272	-57.94	cp	BRD-K14888893	minoxidil	KATP activator
6269	-57.9	cp	BRD-K97564742	mepyramine	Histamine receptor antagonist
6266	-57.84	cp	BRD-K49668410	clarithromycin	Bacterial 50S ribosomal subunit inhibitor
6254	-57.59	cp	BRD-K47631482	bromhexine	Mucolytic agent
6245	-57.44	cp	BRD-A84702196	penicillin	Bacterial cell wall synthesis inhibitor
6246	-57.44	cp	BRD-A48570745	ivermectin	GABA receptor agonist
6243	-57.38	cp	BRD-K97764662	PD-173074	FGFR inhibitor
6241	-57.32	cp	BRD-K44899736	RO-16-6941	Monoamine oxidase inhibitor
6238	-57.3	cp	BRD-A71459254	cymarin	ATPase inhibitor
6237	-57.29	cp	BRD-K82135108	elesclomol	Oxidative stress inducer
6234	-57.22	cp	BRD-A64092382	mexiletine	Sodium channel blocker
6231	-57.04	cp	BRD-A79237180	ascorbic-acid	Antioxidant
6230	-57	cp	BRD-K05906022	limonin	HIV protease inhibitor
6229	-56.99	cp	BRD-A53952395	prilocaine	Local anesthetic
6223	-56.79	cp	BRD-K90382497	GW-843682X	PLK inhibitor
6218	-56.69	cp	BRD-K76840893	RS-17053	Adrenergic receptor antagonist
6212	-56.63	cp	BRD-K54472332	elvitegravir	HIV integrase inhibitor
6213	-56.63	cp	BRD-K60770992	pergolide	Dopamine receptor agonist
6210	-56.55	cp	BRD-A87125127	3-matida	Glutamate receptor antagonist
6205	-56.5	cp	BRD-K35483542	alitretinoin	Retinoid receptor agonist
6207	-56.5	cp	BRD-A01320529	salmeterol	Adrenergic receptor agonist
6199	-56.29	cp	BRD-K87696786	LY-456236	Glutamate receptor antagonist
6187	-56.08	cp	BRD-K15108141	gemcitabine	Ribonucleotide reductase inhibitor
6179	-55.89	cp	BRD-A07765530	epinephrine	carbonic anhydrase activator
6177	-55.85	cp	BRD-K49810818	sorafenib	FLT3 inhibitor
6170	-55.65	cp	BRD-K55127134	fluphenazine	Dopamine receptor antagonist
6169	-55.58	cp	BRD-K33818169	GW-3965	LXR agonist
6168	-55.54	cp	BRD-K29905972	axitinib	PDGFR receptor inhibitor
6167	-55.52	cp	BRD-K65285700	BRD-K65285700	Cannabinoid receptor agonist
6164	-55.49	cp	BRD-K66782112	BRD-K66782112	Histamine receptor antagonist
6161	-55.46	cp	BRD-A48257147	PHCCC	Glutamate receptor agonist
6158	-55.39	cp	BRD-K31471398	dihydrexidine	Dopamine receptor agonist
6151	-55.21	cp	BRD-K54094468	remoxipride	Dopamine receptor antagonist
6149	-55.17	cp	BRD-A50675702	fipronil	GABA gated chloride channel blocker
6137	-55.01	cp	BRD-K09416995	lovastatin	HMGCR inhibitor
6134	-54.97	cp	BRD-A46393198	tetramisole	Immunostimulant
6128	-54.81	cp	BRD-K31611373	fluprostenol	Prostanoid receptor agonist
6121	-54.65	cp	BRD-A67748489	K3644	Kinesin-like spindle protein inhibitor
6120	-54.63	cp	BRD-K54987996	CAY-10578	Casein kinase inhibitor
6116	-54.49	cp	BRD-K40624912	ZM-39923	JAK inhibitor
6110	-54.36	cp	BRD-A07395371	esmolol	Adrenergic receptor antagonist
6109	-54.34	cp	BRD-K76133116	benzydamine	Membrane integrity inhibitor
6103	-54.28	cp	BRD-A15415227	GW-1929	PPAR receptor agonist
6100	-54.23	cp	BRD-A05352148	ipratropium	Acetylcholine receptor antagonist
6092	-54.08	cp	BRD-K89402695	L-655240	Thromboxane receptor antagonist
6086	-54.03	cp	BRD-K87142802	veliparib	PARP inhibitor
6083	-54.01	cp	BRD-K82164249	andarine	Androgen receptor modulator
6084	-54.01	cp	BRD-A61470182	n-formylmethionylalanine	macrophage activator
6085	-54.01	cp	BRD-A42571354	cetirizine	Histamine receptor antagonist
6082	-53.97	cp	BRD-K39987650	bisacodyl	Laxative
6077	-53.87	cp	BRD-K47869605	podophyllotoxin	Microtubule inhibitor
6075	-53.8	cp	BRD-A37492983	iocetamic-acid	Radiopaque medium
6072	-53.77	cp	BRD-A36217750	sulfinpyrazone	Uricosuric blocker
6069	-53.75	cp	BRD-K52080565	rilmenidine	Imidazoline receptor agonist
6061	-53.64	cp	BRD-K19894101	MST-312	Telomerase inhibitor
6062	-53.64	cp	BRD-A59215453	lobelanidine	Acetylcholine receptor antagonist
6060	-53.63	cp	BRD-A29901043	KIN001-127	ITK inhibitor
6059	-53.62	cp	BRD-K29530284	amlexanox	Histamine receptor modulator
6056	-53.57	cp	BRD-A65767837	hydrocortisone	Glucocorticoid receptor agonist
6051	-53.46	cp	BRD-K40901640	cinanserin	Serotonin receptor antagonist
6048	-53.31	cp	BRD-K36616567	doxepin	Histamine receptor antagonist
6043	-53.17	cp	BRD-A65550283	ginsenoside	Steroid hormone receptor agonist
6038	-53.11	cp	BRD-K09397065	SR-57227A	Serotonin receptor agonist
6026	-52.68	cp	BRD-K46137903	prednicarbate	Phospholipase activator
6025	-52.64	cp	BRD-A41250306	cyclopenthiazide	Thiazide diuretic
6013	-52.43	cp	BRD-A65449987	flunisolide	Cytochrome P450 inhibitor
6007	-52.29	cp	BRD-K85090592	pilocarpine	Acetylcholine receptor agonist
6002	-52.22	cp	BRD-K33453211	levocabastine	Histamine receptor antagonist
5999	-52.12	cp	BRD-A78322124	dobutamine	Adrenergic receptor agonist
5997	-52.01	cp	BRD-A68930007	ouabain	ATPase inhibitor
5995	-51.98	cp	BRD-K06234293	LY-364947	TGF beta receptor inhibitor
5990	-51.89	cp	BRD-A12560204	nitrendipine	Calcium channel blocker
5986	-51.78	cp	BRD-K66792149	quinoclamine	Algicide
5982	-51.74	cp	BRD-K81473089	tacrine	Acetylcholinesterase inhibitor
5980	-51.69	cp	BRD-K82688027	RG-13022	PDGFR receptor inhibitor
5977	-51.65	cp	BRD-A39415247	norethisterone	Progesterone receptor agonist
5973	-51.6	cp	BRD-A58048407	nimodipine	Calcium channel blocker
5971	-51.57	cp	BRD-A64479082	quinidine	Sodium channel blocker
5967	-51.53	cp	BRD-A50737080	CGK-733	ATR kinase inhibitor
5964	-51.47	cp	BRD-A95696066	nisoxetine	Norepinephrine reuptake inhibitor
5962	-51.43	cp	BRD-K75295174	alisertib	Aurora kinase inhibitor
5955	-51.31	cp	BRD-K99749624	linifanib	PDGFR receptor inhibitor
5954	-51.28	cp	BRD-K50168500	canertinib	EGFR inhibitor
5949	-51.22	cp	BRD-K62996583	lidoflazine	Calcium channel blocker
5947	-51.18	cp	BRD-K76274772	MAPP-D-erythro	Ceramidase inhibitor
5943	-51.13	cp	BRD-K90027355	spironolactone	Mineralocorticoid receptor antagonist
5942	-51.12	cp	BRD-K37691127	hinokitiol	Tyrosinase inhibitor
5940	-50.87	cp	BRD-K47150025	KI-8751	VEGFR inhibitor
5939	-50.86	cp	BRD-K81876028	CP-93129	Serotonin receptor agonist
5937	-50.81	cp	BRD-K93332168	isocarboxazid	Monoamine oxidase inhibitor
5931	-50.7	cp	BRD-A85280935	quinpirole	Dopamine receptor agonist
5930	-50.69	cp	BRD-A09467419	mebeverine	Acetylcholine receptor antagonist
5929	-50.66	cp	BRD-K25905511	buddleoflavonoloside	Acetylcholinesterase inhibitor
5928	-50.58	cp	BRD-K63343048	orlistat	Lipase inhibitor
5925	-50.5	cp	BRD-K46678324	RHO-kinase-inhibitor-II	Rho associated kinase inhibitor
5921	-50.42	cp	BRD-K02404261	caffeine	Adenosine receptor antagonist
5920	-50.4	cp	BRD-K13800121	parecoxib	Cyclooxygenase inhibitor
5915	-50.29	cp	BRD-K66788707	fludarabine	DNA synthesis inhibitor
5912	-50.18	cp	BRD-K65814004	diphenyleneiodonium	Nitric oxide synthase inhibitor
5910	-50.14	cp	BRD-K08502430	angiogenesis-inhibitor	Angiogenesis inhibitor
5907	-50.13	cp	BRD-K62959606	sphingosine	Ceramidase inhibitor
5906	-50.07	cp	BRD-K08547377	irinotecan	Topoisomerase inhibitor
5905	-50.02	cp	BRD-A66563878	medetomidine	Adrenergic receptor agonist
5902	-49.97	cp	BRD-K91442916	CAM-9-026	Membrane metalloendopeptidase inhibitor
5890	-49.76	cp	BRD-K93645900	tadalafil	Phosphodiesterase inhibitor
5889	-49.74	cp	BRD-K01555864	dibenzoylmethane	Antineoplastic
5883	-49.6	cp	BRD-K39111395	BCL2-inhibitor	BCL inhibitor
5880	-49.55	cp	BRD-K25310650	ormetoprim	Bacterial antifolate
5874	-49.49	cp	BRD-A29485665	bicalutamide	Androgen receptor antagonist
5872	-49.41	cp	BRD-K93034159	cladribine	Adenosine deaminase inhibitor
5868	-49.32	cp	BRD-K38449220	seneciphylline	Cytochrome P450 inhibitor
5869	-49.32	cp	BRD-K25875056	SC-9	Protein tyrosine kinase activator
5867	-49.29	cp	BRD-K81169441	cerivastatin	HMGCR inhibitor
5863	-49.21	cp	BRD-K79124250	ioxaglic-acid	Radiopaque medium
5859	-49.12	cp	BRD-A42423104	benproperine	Antitussive
5856	-49.06	cp	BRD-K65503129	HSP90-inhibitor	HSP inhibitor
5855	-49.03	cp	BRD-K45479396	BP-554	Serotonin receptor agonist
5853	-48.98	cp	BRD-K08998509	fananserin	Dopamine receptor antagonist
5852	-48.95	cp	BRD-K38903228	hesperidin	Flavanone glycoside
5849	-48.79	cp	BRD-K51066026	aminoindazole	Ionophore
5844	-48.76	cp	BRD-K00532621	midazolam	Benzodiazepine receptor agonist
5840	-48.74	cp	BRD-M45964048	verteporfin	Photosensitizing agent
5839	-48.72	cp	BRD-K97354755	SU-6656	SRC inhibitor
5835	-48.56	cp	BRD-A73368467	fexofenadine	Histamine receptor antagonist
5834	-48.55	cp	BRD-K19605405	ZM-241385	Adenosine receptor antagonist
5833	-48.52	cp	BRD-K60230970	MG-132	Proteasome inhibitor
5830	-48.47	cp	BRD-A68589262	troxipide	Glucosamine synthetase stimulant
5829	-48.44	cp	BRD-K39965020	doconexent	PPAR receptor agonist
5825	-48.4	cp	BRD-K88611939	aniracetam	Glutamate receptor agonist
5819	-48.3	cp	BRD-K83302049	protopine	Histamine receptor antagonist
5818	-48.29	cp	BRD-K25741894	skimmianine	Acetylcholinesterase inhibitor
5810	-48.07	cp	BRD-U44618005	WH-4023	SRC inhibitor
5801	-47.9	cp	BRD-K68873215	phosphodiesterase-V-inhibitor-II	Phosphodiesterase inhibitor
5792	-47.55	cp	BRD-K97509413	coumestrol	Estrogen receptor agonist
5787	-47.37	cp	BRD-A61392169	eliprodil	Glutamate receptor antagonist
5785	-47.35	cp	BRD-K45861246	azaperone	Dopamine receptor antagonist
5780	-47.11	cp	BRD-K68202742	trichostatin-a	HDAC inhibitor
5777	-47.03	cp	BRD-A87719232	naproxen	Cyclooxygenase inhibitor
5773	-46.96	cp	BRD-K21667562	AM-404	Cyclooxygenase inhibitor
5766	-46.86	cp	BRD-A84174393	meloxicam	Cyclooxygenase inhibitor
5758	-46.79	cp	BRD-A82371568	clofarabine	Ribonucleoside reductase inhibitor
5754	-46.59	cp	BRD-K50128260	sildenafil	Phosphodiesterase inhibitor
5748	-46.54	cp	BRD-A31195449	TCB2	Serotonin receptor agonist
5743	-46.5	cp	BRD-U44700465	HG-5-88-01	Protein kinase inhibitor
5744	-46.5	cp	BRD-K93460210	lamotrigine	Serotonin receptor antagonist
5741	-46.44	cp	BRD-K15791587	L-733060	Tachykinin antagonist
5735	-46.29	cp	BRD-A87387433	cefpodoxime	Bacterial cell wall synthesis inhibitor
5731	-46.25	cp	BRD-K85030058	benactyzine	Acetylcholine receptor antagonist
5730	-46.24	cp	BRD-K63550407	erythromycin	NFkB pathway inhibitor
5727	-46.21	cp	BRD-A79672927	tropicamide	Acetylcholine receptor antagonist
5719	-46.06	cp	BRD-K33882852	ZK-93423	Benzodiazepine receptor agonist
5720	-46.06	cp	BRD-K18316707	O-1918	Cannabinoid receptor antagonist
5718	-46.05	cp	BRD-A70268693	PG-9	Acetylcholine receptor agonist
5711	-45.92	cp	BRD-K47780086	penciclovir	DNA directed DNA polymerase inhibitor
5710	-45.91	cp	BRD-K62792802	LY-83583	Guanylyl cyclase inhibitor
5707	-45.88	cp	BRD-K48869804	icilin	TRPV agonist
5704	-45.83	cp	BRD-A23359898	sibutramine	Serotonin reuptake inhibitor
5701	-45.78	cp	BRD-K05434375	HA-1004	Calcium channel blocker
5691	-45.59	cp	BRD-K61401890	deguelin	NADH-ubiquinone oxidoreductase (Complex I) inhibitor
5692	-45.59	cp	BRD-A34806832	proscillaridin	ATPase inhibitor
5689	-45.5	cp	BRD-K14993104	bemegride	Chemoreceptor agonist
5687	-45.49	cp	BRD-K51223576	AG-99	Tyrosine kinase inhibitor
5686	-45.45	cp	BRD-K37846922	3,3'-diindolylmethane	CHK inhibitor
5682	-45.37	cp	BRD-K51313569	palbociclib	CDK inhibitor
5677	-45.32	cp	BRD-A60197193	amisulpride	Dopamine receptor antagonist
5667	-45.01	cp	BRD-A15079084	phorbol-12-myristate-13-acetate	PKC activator
5664	-44.98	cp	BRD-K10016611	pyridine-2-aldoxime	Acetylcholinesterase inhibitor
5662	-44.96	cp	BRD-K59637651	NSC-119889	Protein synthesis inhibitor
5650	-44.7	cp	BRD-K56429665	calcipotriol	Vitamin D receptor agonist
5644	-44.59	cp	BRD-A27887842	prednisolone	Glucocorticoid receptor agonist
5641	-44.56	cp	BRD-K62221994	T-98475	Gonadotropin releasing factor hormone receptor antagonist
5626	-44.22	cp	BRD-K64245000	GW-4064	FXR agonist
5622	-44.14	cp	BRD-A45499626	UBP-302	Glutamate receptor antagonist
5620	-44.12	cp	BRD-K93480852	KN-93	Calcium-calmodulin dependent protein kinase inhibitor
5617	-44.08	cp	BRD-A54927599	KF-38789	P-selectin inhibitor
5618	-44.08	cp	BRD-A37837077	cyclazosin	Adrenergic receptor antagonist
5613	-43.88	cp	BRD-A62071884	siguazodan	Phosphodiesterase inhibitor
5612	-43.84	cp	BRD-A64125466	dehydrocholic-acid	choleretic agent
5608	-43.81	cp	BRD-K53857191	risperidone	Dopamine receptor antagonist
5598	-43.67	cp	BRD-K26863634	BIX-01338	Histone lysine methyltransferase inhibitor
5599	-43.67	cp	BRD-K02992638	lamivudine	Nucleoside reverse transcriptase inhibitor
5596	-43.6	cp	BRD-K82941592	rosuvastatin	HMGCR inhibitor
5593	-43.53	cp	BRD-A31575449	CGP-20712	Adrenergic receptor antagonist
5591	-43.5	cp	BRD-K94512704	spiramide	Dopamine receptor antagonist
5590	-43.49	cp	BRD-K45296539	ZD-7114	Adrenergic receptor agonist
5581	-43.23	cp	BRD-K10843433	phenylbutazone	Cyclooxygenase inhibitor
5577	-43.17	cp	BRD-K14221570	benzopurpurin-4b	HIV entry inhibitor
5578	-43.17	cp	BRD-K20482099	rutin	Antioxidant
5576	-43.16	cp	BRD-K96527333	dehydroisoandosterone	GABA receptor modulator
5572	-43.08	cp	BRD-K54665485	R-59022	Diacylglycerol kinase inhibitor
5571	-43.05	cp	BRD-A70514680	articaine	Local anesthetic
5566	-42.97	cp	BRD-K87573634	propylpyrazole	Estrogen receptor agonist
5563	-42.94	cp	BRD-A98299281	velnacrine	cholinesterase inhibitor
5561	-42.84	cp	BRD-K32526544	DCEBIO	Potassium channel activator
5557	-42.79	cp	BRD-K00673382	famotidine	Histamine receptor antagonist
5558	-42.79	cp	BRD-K14807180	SB-221284	Serotonin receptor antagonist
5548	-42.65	cp	BRD-K31491153	1-phenylbiguanide	Serotonin receptor agonist
5539	-42.48	cp	BRD-K96271548	coumaric-acid	Antioxidant
5535	-42.33	cp	BRD-K99595596	salsolinol	Monoamine oxidase inhibitor
5532	-42.26	cp	BRD-K41564320	purvalanol-b	Tyrosine kinase inhibitor
5531	-42.25	cp	BRD-K04046242	equilin	Estrogen receptor agonist
5529	-42.21	cp	BRD-K09638361	SA-63133	-666
5527	-42.19	cp	BRD-K25311561	KU-55933	ATM kinase inhibitor
5517	-42	cp	BRD-A16700644	isoxsuprine	Adrenergic receptor agonist
5502	-41.6	cp	BRD-A04553218	chlorphenamine	Histamine receptor antagonist
5505	-41.6	cp	BRD-K91263825	nortriptyline	Tricyclic antidepressant
5499	-41.55	cp	BRD-K85871428	SC-68376	p38 MAPK inhibitor
5497	-41.51	cp	BRD-K88358234	xaliproden	Serotonin receptor agonist
5496	-41.5	cp	BRD-K39733634	L-161982	Prostanoid receptor antagonist
5488	-41.3	cp	BRD-K40887525	ritanserin	Serotonin receptor antagonist
5487	-41.26	cp	BRD-A78877355	nefopam	Cyclooxygenase inhibitor
5486	-41.22	cp	BRD-K16485616	mocetinostat	HDAC inhibitor
5485	-41.21	cp	BRD-A09094913	strychnine	Acetylcholine receptor antagonist
5481	-41.1	cp	BRD-K04976539	aminogenistein	SRC inhibitor
5479	-41.05	cp	BRD-A32349859	methyl-angolensate	Apoptosis inhibitor
5473	-40.94	cp	BRD-K17743125	belinostat	HDAC inhibitor
5471	-40.9	cp	BRD-A59985574	topotecan	Topoisomerase inhibitor
5470	-40.86	cp	BRD-A35989968	megestrol	Progesterone receptor agonist
5464	-40.76	cp	BRD-K10860596	granisetron	Serotonin receptor antagonist
5460	-40.73	cp	BRD-A09062839	amylocaine	Local anesthetic
5456	-40.67	cp	BRD-K81916719	triclabendazole	Microtubule inhibitor
5455	-40.65	cp	BRD-K71430621	clobenpropit	Histamine receptor antagonist
5451	-40.58	cp	BRD-K52735702	cefdinir	Bacterial cell wall synthesis inhibitor
5444	-40.38	cp	BRD-K82381502	acetylcholine	Acetylcholine receptor agonist
5442	-40.37	cp	BRD-K93441486	diphemanil	Acetylcholine receptor antagonist
5440	-40.34	cp	BRD-K01493881	apigenin	Casein kinase inhibitor
5435	-40.29	cp	BRD-K71103788	duloxetine	Serotonin reuptake inhibitor
5433	-40.25	cp	BRD-K81418486	vorinostat	HDAC inhibitor
5432	-40.24	cp	BRD-K47717570	NBQX	Glutamate receptor antagonist
5423	-40.07	cp	BRD-K14681867	somatostatin	Somatostatin receptor agonist
5418	-40.04	cp	BRD-K95921201	reserpine	Vesicular monoamine transporter inhibitor
5411	-39.86	cp	BRD-K07691486	roscovitine	CDK inhibitor
5407	-39.82	cp	BRD-K04430056	7-nitroindazole	nitric oxide synthase inhibitor
5406	-39.8	cp	BRD-K89375097	pirenzepine	Acetylcholine receptor antagonist
5399	-39.62	cp	BRD-K03440695	boldine	Acetylcholine receptor antagonist
5397	-39.55	cp	BRD-K62374253	rufloxacin	Bacterial DNA gyrase inhibitor
5392	-39.33	cp	BRD-A39290993	cyproterone	Androgen receptor antagonist
5390	-39.27	cp	BRD-K89162000	tandutinib	FLT3 inhibitor
5389	-39.23	cp	BRD-K02275692	cefotiam	Bacterial cell wall synthesis inhibitor
5388	-39.2	cp	BRD-K91243525	SR-142948	Neurotensin receptor antagonist
5382	-39.1	cp	BRD-K07403598	CAY-10470	NFkB pathway inhibitor
5380	-39.04	cp	BRD-K84639753	safinamide	Dopamine uptake inhibitor
5379	-39.02	cp	BRD-K67100011	pivmecillinam	Bacterial cell wall synthesis inhibitor
5378	-39.01	cp	BRD-A39969961	eplerenone	Cytochrome P450 inhibitor
5375	-38.97	cp	BRD-K15916496	clotrimazole	Cytochrome P450 inhibitor
5374	-38.95	cp	BRD-K76908866	CP-724714	EGFR inhibitor
5372	-38.88	cp	BRD-K61323504	SB-225002	CC chemokine receptor antagonist
5368	-38.78	cp	BRD-A02990301	lofexidine	Adrenergic receptor agonist
5360	-38.69	cp	BRD-K32330832	VER-155008	HSP inhibitor
5357	-38.66	cp	BRD-K64044582	linoleamide	ACAT inhibitor
5356	-38.64	cp	BRD-K02953697	naringin	Cytochrome P450 inhibitor
5348	-38.49	cp	BRD-K79116891	proxymetacaine	Sodium channel blocker
5346	-38.46	cp	BRD-K31912990	CGP-71683	Neuropeptide receptor antagonist
5343	-38.41	cp	BRD-A55756846	H-7	PKA inhibitor
5342	-38.39	cp	BRD-A71765365	mepireserpate	Catecholamine depleting sympatholytic
5339	-38.37	cp	BRD-K08556791	ethoprop	Acetylcholinesterase inhibitor
5332	-38.28	cp	BRD-K12932420	YM-976	Phosphodiesterase inhibitor
5323	-38.07	cp	BRD-A92630576	trimebutine	Opioid receptor agonist
5319	-38.01	cp	BRD-K06753942	nobiletin	MEK inhibitor
5315	-37.86	cp	BRD-K95851186	CGP-13501	GABA receptor modulator
5316	-37.86	cp	BRD-K98530306	clonidine	Adrenergic receptor agonist
5307	-37.76	cp	BRD-K50417881	eticlopride	Dopamine receptor antagonist
5305	-37.75	cp	BRD-K19352500	prochlorperazine	Dopamine receptor antagonist
5300	-37.68	cp	BRD-A41833852	naloxone	Opioid receptor antagonist
5297	-37.58	cp	BRD-K83508485	FK-888	Tachykinin antagonist
5291	-37.53	cp	BRD-K00662280	CL-218872	GABA receptor agonist
5292	-37.53	cp	BRD-K92760278	riboflavin	Vitamin B
5293	-37.53	cp	BRD-K43736954	cortisone	Glucocorticoid receptor agonist
5287	-37.46	cp	BRD-K60923938	veratridine	Sodium channel activator
5271	-37.17	cp	BRD-K17075857	chloroxine	Opioid receptor antagonist
5269	-37.13	cp	BRD-K71499074	diclofenamide	Carbonic anhydrase inhibitor
5263	-37.02	cp	BRD-A94669766	naringenin	Aromatase inhibitor
5261	-37.01	cp	BRD-A96255180	ribavirin	Antiviral
5256	-36.92	cp	BRD-K86465814	HO-013	PPAR receptor agonist
5250	-36.81	cp	BRD-K04412738	tramadol	Norepinephrine reuptake inhibitor
5251	-36.81	cp	BRD-A49358627	ciprofibrate	PPAR receptor agonist
5249	-36.79	cp	BRD-K14282469	LY-165163	Serotonin receptor antagonist
5246	-36.7	cp	BRD-A54596827	solifenacin	Acetylcholine receptor antagonist
5242	-36.59	cp	BRD-K01649396	indatraline	Norepinephrine transporter inhibitor
5241	-36.53	cp	BRD-K97118047	4,5,6,7-tetrabromobenzotriazole	Casein kinase inhibitor
5238	-36.5	cp	BRD-K35559145	levomepromazine	Dopamine receptor antagonist
5236	-36.41	cp	BRD-K12120659	GR-144053	Integrin antagonist
5234	-36.35	cp	BRD-A70449690	forskolin	Adenylyl cyclase activator
5231	-36.33	cp	BRD-K29359156	ebselen	H+/K+-ATPase inhibitor
5232	-36.33	cp	BRD-K72029282	probucol	Atherogenesis inhibitor
5224	-36.22	cp	BRD-K14821540	FCCP	Mitochondrial oxidative phosphorylation uncoupler
5223	-36.2	cp	BRD-K67783091	haloperidol	Dopamine receptor antagonist
5221	-36.1	cp	BRD-A91866971	SQ-29548	Thromboxane receptor antagonist
5220	-36.09	cp	BRD-K66412701	pazufloxacin	Topoisomerase inhibitor
5219	-36.07	cp	BRD-A99833829	bethanechol	Acetylcholine receptor agonist
5217	-36.04	cp	BRD-A02189320	met-leu-phe	-666
5211	-35.8	cp	BRD-K36862742	hydroflumethiazide	Sodium/potassium/chloride transporter inhibitor
5207	-35.73	cp	BRD-K49404994	levetiracetam	Calcium channel blocker
5205	-35.72	cp	BRD-A62184259	cycloheximide	Protein synthesis inhibitor
5201	-35.65	cp	BRD-K76698671	HNHA	HDAC inhibitor
5200	-35.64	cp	BRD-K00610438	altanserin	Serotonin receptor antagonist
5199	-35.62	cp	BRD-K26429091	J-104129	Acetylcholine receptor antagonist
5195	-35.53	cp	BRD-A68039575	liquiritigenin	Aromatase inhibitor
5193	-35.51	cp	BRD-K51730347	diphencyprone	Immunostimulant
5192	-35.5	cp	BRD-K22193694	dioxybenzone	Topical sunscreen agent
5179	-35.29	cp	BRD-A43671941	oxprenolol	Adrenergic receptor antagonist
5176	-35.24	cp	BRD-K29668683	BD-1063	Sigma receptor antagonist
5172	-35.15	cp	BRD-K50135270	GBR-12935	Dopamine uptake inhibitor
5168	-34.97	cp	BRD-K81855038	roxatidine	Histamine receptor antagonist
5169	-34.97	cp	BRD-A03623303	metoprolol	Adrenergic receptor antagonist
5165	-34.91	cp	BRD-K49328571	dasatinib	BCR-ABL kinase inhibitor
5161	-34.8	cp	BRD-K05396879	15-delta-prostaglandin-j2	PPAR receptor agonist
5158	-34.73	cp	BRD-K93201660	ML-7	Myosin light chain kinase inhibitor
5155	-34.68	cp	BRD-K17743697	KB-R7943	Sodium/calcium exchange inhibitor
5151	-34.58	cp	BRD-K28936863	ketotifen	Histamine receptor agonist
5147	-34.49	cp	BRD-K03557653	sappanone-a	Tyrosinase inhibitor
5145	-34.45	cp	BRD-K40902647	vincamine	Adrenergic receptor antagonist
5146	-34.45	cp	BRD-A06352508	SB-218078	CHK inhibitor
5138	-34.26	cp	BRD-K78633253	EXO-1	ARF inhibitor
5134	-34.19	cp	BRD-K09537769	NU-7026	DNA dependent protein kinase inhibitor
5132	-34.16	cp	BRD-K54411430	robustic-acid	cAMP inhibitor
5128	-34.14	cp	BRD-K27499107	carbacyclin	IP receptor activator
5129	-34.14	cp	BRD-K50464341	berbamine	Calmodulin antagonist
5124	-34.04	cp	BRD-A41519720	ezetimibe	Niemann-Pick C1-like 1 protein antagonist
5118	-34	cp	BRD-K45435259	SCH-23390	Dopamine receptor antagonist
5119	-34	cp	BRD-K90524085	MY-5445	Phosphodiesterase inhibitor
5115	-33.96	cp	BRD-K37991163	paroxetine	Selective serotonin reuptake inhibitor (SSRI)
5114	-33.95	cp	BRD-A56020723	CA-074-Me	Cathepsin inhibitor
5109	-33.83	cp	BRD-A52588987	SKF-83566	Dopamine receptor antagonist
5105	-33.8	cp	BRD-K32710582	EI-247	IGF-1 inhibitor
5093	-33.59	cp	BRD-M64432851	sunitinib	FLT3 inhibitor
5091	-33.55	cp	BRD-A02759312	betaxolol	Adrenergic receptor antagonist
5087	-33.5	cp	BRD-K31843556	T-0070907	PPAR receptor antagonist
5083	-33.41	cp	BRD-K13087974	4,5-dianilinophthalimide	EGFR inhibitor
5084	-33.41	cp	BRD-K11630072	carmofur	Thymidylate synthase inhibitor
5073	-33.14	cp	BRD-K76568384	PHTPP	Estrogen receptor antagonist
5072	-33.12	cp	BRD-K35629949	SR-27897	CCK receptor antagonist
5063	-33.01	cp	BRD-A71203467	l-stepholidine	Dopamine receptor antagonist
5059	-32.9	cp	BRD-A39172021	ampiroxicam	Cyclooxygenase inhibitor
5056	-32.87	cp	BRD-K80431395	triciribine	AKT inhibitor
5054	-32.84	cp	BRD-K33204703	AG-370	PDGFR receptor inhibitor
5051	-32.77	cp	BRD-K28029915	dolasetron	Serotonin receptor antagonist
5045	-32.69	cp	BRD-A24817035	laudanosine	Central nervous system agent
5042	-32.59	cp	BRD-K09668667	benzo(a)pyrene	Carcinogen
5039	-32.55	cp	BRD-K38251852	paxilline	Potassium channel blocker
5036	-32.53	cp	BRD-K24859147	KIN001-242	Protein kinase inhibitor
5030	-32.42	cp	BRD-A48720949	testosterone	androgen receptor agonist
5027	-32.36	cp	BRD-K42679050	Y-27152	Potassium channel activator
5026	-32.34	cp	BRD-A25067867	benzatropine	Acetylcholine receptor antagonist
5025	-32.29	cp	BRD-K00675675	CL-82198	Metalloproteinase inhibitor
5023	-32.25	cp	BRD-K28849549	mesalazine	Cyclooxygenase inhibitor
5019	-32.2	cp	BRD-K26521938	dinoprostone	Prostanoid receptor agonist
5018	-32.19	cp	BRD-A16332958	modafinil	Adrenergic receptor agonist
5012	-32.09	cp	BRD-K53972329	ruxolitinib	JAK inhibitor
5010	-32.08	cp	BRD-A83431637	resmethrin	Cytochrome P450 inhibitor
5006	-31.97	cp	BRD-A65597028	RX-821002	Adrenergic receptor antagonist
5004	-31.95	cp	BRD-A83326220	brazilin	Nitric oxide production inhibitor
4994	-31.67	cp	BRD-K66707493	lawsone	Coloring agent
4995	-31.67	cp	BRD-A65145453	ATPA	Glutamate receptor agonist
4988	-31.6	cp	BRD-A10420615	cyclopiazonic-acid	ATPase inhibitor
4982	-31.49	cp	BRD-A41112154	oleanolic-acid	G protein-coupled receptor agonist
4977	-31.42	cp	BRD-K82255054	propofol	GABA receptor agonist
4974	-31.36	cp	BRD-K96144918	mead-acid	KPL-1 tumor suppressor
4973	-31.31	cp	BRD-K04210847	tamoxifen	Estrogen receptor antagonist
4969	-31.25	cp	BRD-K60160658	tiagabine	GABA uptake inhibitor
4963	-31.12	cp	BRD-U82589721	HG-5-113-01	Protein kinase inhibitor
4961	-30.96	cp	BRD-A51410489	yohimbine	Adrenergic receptor antagonist
4962	-30.96	cp	BRD-K35531059	molsidomine	Guanylyl cyclase activator
4960	-30.95	cp	BRD-K15588452	R-96544	Serotonin receptor antagonist
4950	-30.81	cp	BRD-K04877770	FTase-inhibitor-B581	Farnesyltransferase inhibitor
4949	-30.75	cp	BRD-K54095730	CMPD-1	p38 MAPK inhibitor
4944	-30.65	cp	BRD-A22684332	procaterol	Adrenergic receptor agonist
4934	-30.4	cp	BRD-K08252256	diclofenac	Cyclooxygenase inhibitor
4933	-30.34	cp	BRD-A28746609	paclitaxel	Tubulin inhibitor
4932	-30.33	cp	BRD-A19195498	trimipramine	Norepinephrine reuptake inhibitor
4928	-30.31	cp	BRD-K54759182	dosulepin	Norepinephrine reuptake inhibitor
4927	-30.3	cp	BRD-K98548675	parthenolide	NFkB pathway inhibitor
4925	-30.23	cp	BRD-K99107520	felbamate	Glutamate receptor antagonist
4922	-30.2	cp	BRD-K73397362	purmorphamine	Smoothened receptor agonist
4921	-30.19	cp	BRD-A73859745	glycodeoxycholic-acid	Apoptosis stimulant
4919	-30.17	cp	BRD-K30240666	clemastine	Histamine receptor antagonist
4917	-30.15	cp	BRD-K08619838	tremorine	Acetylcholine receptor agonist
4911	-30.05	cp	BRD-K17896185	FIT	Opioid receptor agonist
4910	-30.03	cp	BRD-K92000912	AM-251	Cannabinoid receptor antagonist
4909	-29.99	cp	BRD-K77695569	tiabendazole	Angiogenesis inhibitor
4900	-29.79	cp	BRD-K06467078	corynanthine	Adrenergic receptor antagonist
4896	-29.75	cp	BRD-K00206590	P-1075	ATP channel activator
4894	-29.74	cp	BRD-K51805276	temefos	Cholinesterase inhibitor
4893	-29.73	cp	BRD-K60060639	methyllidocaine	antiarrhythmic medication
4881	-29.45	cp	BRD-K07762753	aminopurvalanol-a	Tyrosine kinase inhibitor
4880	-29.44	cp	BRD-A39255369	DCPIB	Chloride channel blocker
4877	-29.41	cp	BRD-K95739795	tetrabenazine	Vesicular monoamine transporter inhibitor
4873	-29.37	cp	BRD-K95899059	LY-344864	Serotonin receptor agonist
4862	-29.08	cp	BRD-K74733595	APHA-compound-8	HDAC inhibitor
4861	-29.07	cp	BRD-A42167015	carteolol	Adrenergic receptor antagonist
4857	-28.99	cp	BRD-K27737647	H-89	PKA inhibitor
4858	-28.99	cp	BRD-K53414658	tivozanib	VEGFR inhibitor
4854	-28.93	cp	BRD-K56509348	BMS-182874	Endothelin receptor antagonist
4851	-28.84	cp	BRD-A56012032	thiorphan	Membrane metalloendopeptidase inhibitor
4849	-28.81	cp	BRD-K15567136	papaverine	Phosphodiesterase inhibitor
4842	-28.69	cp	BRD-K27871032	lysergol	Ergoline alkaloid
4837	-28.65	cp	BRD-A37347161	BRL-52537	Opioid receptor agonist
4836	-28.64	cp	BRD-K36395411	SB-206553	Serotonin receptor antagonist
4832	-28.58	cp	BRD-K75532464	FTI-276	Farnesyltransferase inhibitor
4824	-28.46	cp	BRD-K79353516	indolophenanthridine	CALY activator
4823	-28.42	cp	BRD-K36927236	glibenclamide	Sulfonylurea
4820	-28.39	cp	BRD-K66019333	oxantel	Anthelmintic
4814	-28.23	cp	BRD-K64606589	apicidin	HDAC inhibitor
4811	-28.2	cp	BRD-K10098805	rhapontin	Apoptosis stimulant
4809	-28.18	cp	BRD-A82590476	SDZ-NKT-343	Tachykinin antagonist
4807	-28.14	cp	BRD-K38305202	domperidone	Dopamine receptor antagonist
4798	-27.99	cp	BRD-A14208071	oxyphenonium	Cholinergic receptor antagonist
4796	-27.97	cp	BRD-A52172093	VU-0413807-2	Calcium channel blocker
4795	-27.9	cp	BRD-K18787491	U-0126	MEK inhibitor
4789	-27.77	cp	BRD-A77722753	hydralazine	Vasodilator
4784	-27.61	cp	BRD-K71534238	GW-9508	Free fatty acid receptor agonist
4783	-27.6	cp	BRD-A08003242	rhodomyrtoxin-b	sodium fluorescein uptake inhibitor
4778	-27.53	cp	BRD-K46018455	bezafibrate	PPAR receptor agonist
4771	-27.45	cp	BRD-A60245366	AS-601245	JNK inhibitor
4772	-27.45	cp	BRD-A83937277	mephenytoin	Hydantoin antiepileptic
4770	-27.43	cp	BRD-K14693417	cinchonine	P-glycoprotein inhibitor
4769	-27.41	cp	BRD-K07220430	cinnarizine	Calcium channel blocker
4767	-27.4	cp	BRD-A64228451	terreic-acid	BTK inhibitor
4757	-27.18	cp	BRD-A71262238	nafadotride	Dopamine receptor antagonist
4756	-27.16	cp	BRD-K50384076	7,4'-dihydroxyflavone	Opioid receptor antagonist
4755	-27.13	cp	BRD-A01643550	prednisolone	Glucocorticoid receptor agonist
4751	-27.09	cp	BRD-K15164005	apoptosis-activator-II	Carboxylesterase inhibitor
4743	-26.91	cp	BRD-K09635314	M-3M3FBS	phospholipase activator
4740	-26.85	cp	BRD-A74500471	ethambutol	Bacterial cell wall synthesis inhibitor
4738	-26.81	cp	BRD-K74133369	oligomycin-a	ATP synthase inhibitor
4736	-26.79	cp	BRD-K40965114	cyanopindolol	Adrenergic receptor antagonist
4735	-26.78	cp	BRD-K98763141	niflumic-acid	Cyclooxygenase inhibitor
4734	-26.77	cp	BRD-A53077924	tianeptine	Selective serotonin reuptake enhancer (SSRE)
4732	-26.74	cp	BRD-A42553870	L-152804	Neuropeptide receptor antagonist
4727	-26.6	cp	BRD-K46384212	o-3M3FBS	phospholipase activator
4724	-26.58	cp	BRD-K74761218	WT-171	HDAC inhibitor
4723	-26.57	cp	BRD-K52721684	PCO-400	Potassium channel activator
4722	-26.56	cp	BRD-K10961822	latanoprost	Prostanoid receptor agonist
4717	-26.43	cp	BRD-A65013509	oxybutynin	Acetylcholine receptor antagonist
4716	-26.39	cp	BRD-K65910366	KUC103904N	-666
4715	-26.38	cp	BRD-A28422058	L-689560	Glutamate receptor antagonist
4713	-26.34	cp	BRD-K07507905	BRL-37344	Adrenergic receptor agonist
4710	-26.24	cp	BRD-A85472596	L-670596	Prostanoid receptor antagonist
4706	-26.18	cp	BRD-K54142781	cirazoline	Adrenergic receptor agonist
4698	-26.08	cp	BRD-A77050075	heraclenol	Vitamin K antagonist
4690	-25.98	cp	BRD-K29582115	ziprasidone	Dopamine receptor antagonist
4684	-25.74	cp	BRD-K93880783	stavudine	DNA directed DNA polymerase inhibitor
4679	-25.57	cp	BRD-K60460488	nelfinavir	HIV protease inhibitor
4675	-25.51	cp	BRD-K36965586	m-chlorophenylbiguanide	Serotonin receptor agonist
4673	-25.46	cp	BRD-K62858456	lomerizine	Calcium channel blocker
4666	-25.36	cp	BRD-K68392338	ZK-93426	Benzodiazepine receptor antagonist
4667	-25.36	cp	BRD-K96670504	lonidamine	Glucokinase inhibitor
4668	-25.36	cp	BRD-K06335600	tizanidine	Adrenergic receptor agonist
4664	-25.34	cp	BRD-K40758068	efavirenz	HIV protease inhibitor
4661	-25.28	cp	BRD-K04710043	hexamethylenebisacetamide	AKT inhibitor
4657	-25.09	cp	BRD-K33312228	halometasone	Glucocorticoid receptor agonist
4648	-24.93	cp	BRD-K54771420	glycocholic-acid	Cholesterol inhibitor
4646	-24.91	cp	BRD-K94649603	taxifolin	Opioid receptor antagonist
4642	-24.83	cp	BRD-K85266041	DNQX	Glutamate receptor antagonist
4640	-24.78	cp	BRD-K70327191	benzoxiquine	Anti-infective
4639	-24.77	cp	BRD-K16277217	piperacetazine	Dopamine receptor antagonist
4638	-24.74	cp	BRD-K09186807	KIN001-244	Phosphoinositide dependent kinase inhibitor
4635	-24.73	cp	BRD-K56957086	dacinostat	HDAC inhibitor
4631	-24.71	cp	BRD-A54487287	cortisone	Glucocorticoid receptor agonist
4629	-24.7	cp	BRD-K76907295	VU-0418947-2	HIF modulator
4623	-24.59	cp	BRD-K30563334	rifabutin	Protein synthesis inhibitor
4624	-24.59	cp	BRD-K87024524	phenelzine	Monoamine oxidase inhibitor
4622	-24.55	cp	BRD-K67261995	adipiodone	Contrast agent
4607	-24.25	cp	BRD-K79092138	nitrofural	Bacterial DNA inhibitor
4599	-24.19	cp	BRD-K71823332	epothilone-a	Microtubule stabilizing agent
4595	-24.14	cp	BRD-K71003802	hippeastrine	Plant alkaloid
4596	-24.14	cp	BRD-A62057054	MDL-11939	Serotonin receptor antagonist
4592	-23.92	cp	BRD-A84481105	thioridazine	Dopamine receptor antagonist
4590	-23.88	cp	BRD-K43978949	PIT	Purinergic receptor antagonist
4589	-23.82	cp	BRD-A11135865	nor-binaltorphimine	Opioid receptor antagonist
4587	-23.78	cp	BRD-A10903566	imiloxan	Adrenergic receptor antagonist
4586	-23.75	cp	BRD-K72903603	zidovudine	Reverse transcriptase inhibitor
4583	-23.68	cp	BRD-A65671304	candesartan	Angiotensin receptor antagonist
4582	-23.67	cp	BRD-K22503835	scriptaid	HDAC inhibitor
4581	-23.59	cp	BRD-A75402480	desoxycorticosterone	Mineralocorticoid receptor agonist
4580	-23.57	cp	BRD-A29437505	RWJ-21757	TLR agonist
4572	-23.38	cp	BRD-A00520476	otenzepad	Acetylcholine receptor antagonist
4570	-23.34	cp	BRD-A73741725	exemestane	Aromatase inhibitor
4564	-23.23	cp	BRD-K49481516	galantamine	Acetylcholinesterase inhibitor
4561	-23.2	cp	BRD-A04352665	maraviroc	CC chemokine receptor antagonist
4562	-23.2	cp	BRD-K50018155	RS-67506	Serotonin receptor partial agonist
4560	-23.19	cp	BRD-K27184429	levocetirizine	Histamine receptor antagonist
4548	-23	cp	BRD-K85015012	NNC-05-2090	GAT inhibitor
4545	-22.95	cp	BRD-K08973992	linoleic-acid	Oxidative stress inducer
4543	-22.9	cp	BRD-K09963420	saquinavir	HIV protease inhibitor
4539	-22.83	cp	BRD-K03981224	ethisterone	Progestogen hormone
4536	-22.77	cp	BRD-A54880345	etomidate	GABA receptor modulator
4535	-22.74	cp	BRD-K76723084	isotretinoin	Retinoid receptor agonist
4531	-22.72	cp	BRD-K84566043	fenpiverinium	Acetylcholine receptor antagonist
4532	-22.72	cp	BRD-K90789829	nefazodone	Adrenergic inhibitor
4525	-22.55	cp	BRD-K81729199	AQ-RA741	Acetylcholine receptor antagonist
4522	-22.5	cp	BRD-K28667793	pyrazinamide	Fatty acid synthase inhibitor
4520	-22.46	cp	BRD-K20152659	gamma-homolinolenic-acid	Cholesterol inhibitor
4513	-22.37	cp	BRD-K16508793	diazepam	Benzodiazepine receptor agonist
4511	-22.28	cp	BRD-A26032986	zaldaride	Calmodulin antagonist
4510	-22.27	cp	BRD-K55430733	WAY-629	Serotonin receptor agonist
4509	-22.26	cp	BRD-K39670393	amthamine	Histamine receptor agonist
4508	-22.25	cp	BRD-K29173907	isoflupredone	Glucocorticoid receptor agonist
4502	-22.16	cp	BRD-K52020312	metronidazole	DNA inhibitor
4495	-21.98	cp	BRD-K94920105	DR-2313	PARP inhibitor
4490	-21.89	cp	BRD-K35430135	SR-59230A	Adrenergic receptor antagonist
4489	-21.86	cp	BRD-K65417056	meprylcaine	Local anesthetic
4484	-21.77	cp	BRD-K96319534	phentermine	Dopamine uptake inhibitor
4473	-21.55	cp	BRD-A20239487	atenolol	Adrenergic receptor antagonist
4469	-21.48	cp	BRD-K31553034	zibotentan	Endothelin receptor antagonist
4465	-21.41	cp	BRD-A70649075	sulconazole	Sterol demethylase inhibitor
4460	-21.21	cp	BRD-K34608650	BRD-K34608650	Cannabinoid receptor agonist
4458	-21.19	cp	BRD-K72420232	WZ-4002	EGFR inhibitor
4457	-21.15	cp	BRD-K24994810	androstenol	GABA receptor modulator
4452	-21.08	cp	BRD-K09497549	kawain	Calcium channel modulator
4451	-21.07	cp	BRD-K04010869	prostaglandin-a1	HSP inducer
4449	-21.03	cp	BRD-U97083655	teicoplanin	Bacterial cell wall synthesis inhibitor
4448	-21.02	cp	BRD-K93918653	quizartinib	FLT3 inhibitor
4447	-20.98	cp	BRD-K43405658	tyrphostin-AG-527	Protein tyrosine kinase inhibitor
4430	-20.62	cp	BRD-K12357156	AG-490	EGFR inhibitor
4423	-20.47	cp	BRD-A44780397	mifepristone	Glucocorticoid receptor antagonist
4419	-20.3	cp	BRD-K82147103	lofepramine	Norepinephrine reuptake inhibitor
4418	-20.28	cp	BRD-K64052750	gefitinib	EGFR inhibitor
4415	-20.18	cp	BRD-K65331431	retinyl	vitamin analog
4413	-20.17	cp	BRD-K32836707	CAY-10577	Casein kinase inhibitor
4400	-19.92	cp	BRD-K62353524	DY-131	Estrogen receptor agonist
4390	-19.58	cp	BRD-A94756469	digoxin	ATPase inhibitor
4387	-19.44	cp	BRD-K66896231	BRD-K66896231	Acetylcholinesterase inhibitor
4385	-19.42	cp	BRD-A13084692	troglitazone	Insulin sensitizer
4383	-19.4	cp	BRD-A67799922	phenoxybenzamine	Adrenergic receptor antagonist
4377	-19.29	cp	BRD-A63546914	RO-04-5595	Glutamate receptor antagonist
4366	-19.09	cp	BRD-K87991767	umbelliferone	Cyclooxygenase inhibitor
4360	-19.04	cp	BRD-K12244279	MEK1-2-inhibitor	MEK inhibitor
4359	-19.03	cp	BRD-A33447119	oxfendazole	Anthelmintic
4355	-18.97	cp	BRD-K10870738	CDC	Lipoxygenase inhibitor
4353	-18.96	cp	BRD-K05977355	fluconazole	Sterol demethylase inhibitor
4351	-18.93	cp	BRD-A39390670	rabeprazole	ATPase inhibitor
4345	-18.83	cp	BRD-A75368507	demeclocycline	Bacterial 30S ribosomal subunit inhibitor
4343	-18.81	cp	BRD-K17796732	JWH-015	Cannabinoid receptor agonist
4324	-18.35	cp	BRD-A99411506	esculin	Antioxidant
4320	-18.25	cp	BRD-K67277431	picotamide	Thromboxane receptor antagonist
4317	-18.21	cp	BRD-A75769826	SDM25N	Opioid receptor antagonist
4315	-18.17	cp	BRD-K51302260	KU-C103871	GSP agonist
4311	-18.14	cp	BRD-A39052811	mosapride	Serotonin receptor agonist
4309	-18.08	cp	BRD-A58157837	butabindide	Tripeptidyl peptidase inhibitor
4307	-18.06	cp	BRD-A62021152	WAY-161503	Serotonin receptor agonist
4293	-17.76	cp	BRD-K48300629	zonisamide	Sodium channel blocker
4285	-17.56	cp	BRD-A47494775	dipivefrine	Adrenergic receptor agonist
4282	-17.5	cp	BRD-K11634954	GBR-13069	Dopamine uptake inhibitor
4281	-17.47	cp	BRD-A66927094	nemonapride	Dopamine receptor antagonist
4274	-17.3	cp	BRD-K35377380	I-OMe-AG-538	IGF-1 inhibitor
4270	-17.18	cp	BRD-K72703948	ZM-447439	Aurora kinase inhibitor
4268	-17.17	cp	BRD-K59570838	homoveratrylamine	Dopamine analog
4264	-17.13	cp	BRD-A40639672	ketorolac	Cyclooxygenase inhibitor
4256	-16.76	cp	BRD-A91008255	bepridil	Calcium channel blocker
4255	-16.72	cp	BRD-K80315159	DPPE	Histamine receptor antagonist
4254	-16.71	cp	BRD-A16444946	acarbose	Glucosidase inhibitor
4250	-16.56	cp	BRD-A95869247	indapamide	Thiazide diuretic
4248	-16.53	cp	BRD-K77171813	proxyfan	Histamine receptor modulator
4247	-16.52	cp	BRD-K95609758	BMS-191011	Potassium channel activator
4245	-16.48	cp	BRD-A22844106	tenoxicam	Cyclooxygenase inhibitor
4241	-16.42	cp	BRD-K37618799	MRS-1220	Adenosine receptor antagonist
4239	-16.39	cp	BRD-K78280988	anandamide	Cannabinoid receptor agonist
4235	-16.31	cp	BRD-K62012036	acitretin	Retinoid receptor agonist
4234	-16.28	cp	BRD-A18497530	5-iodotubercidin	Adenosine kinase inhibitor
4230	-16.2	cp	BRD-K83637872	SANT-1	Smoothened receptor antagonist
4229	-16.19	cp	BRD-A78377521	monastrol	Kinesin-like spindle protein inhibitor
4221	-16.03	cp	BRD-K49890030	gavestinel	Glutamate receptor antagonist
4219	-16.02	cp	BRD-A42831637	tetrahydrocannabinol-7-oic-acid	Anti-inflammatory
4218	-16.01	cp	BRD-A14395271	mesoridazine	Dopamine receptor antagonist
4217	-15.99	cp	BRD-A46186775	hydrocortisone	Glucocorticoid receptor agonist
4215	-15.91	cp	BRD-K36864847	BD-1047	Adrenergic receptor antagonist
4210	-15.77	cp	BRD-K55034111	pefloxacin	Bacterial DNA gyrase inhibitor
4205	-15.64	cp	BRD-K67537649	PQ-401	IGF-1 inhibitor
4196	-15.52	cp	BRD-K95202259	ML-3163	p38 MAPK inhibitor
4193	-15.5	cp	BRD-A35588707	teniposide	Topoisomerase inhibitor
4192	-15.49	cp	BRD-K40578143	GR-79236	Adenosine receptor agonist
4190	-15.48	cp	BRD-K45068323	W-13	Calmodulin antagonist
4191	-15.48	cp	BRD-K30480208	torasemide	Electrolyte reabsorption inhibitor
4184	-15.31	cp	BRD-K91699951	benzonatate	Local anesthetic
4176	-15.08	cp	BRD-K29458283	chlorambucil	DNA inhibitor
4173	-15.03	cp	BRD-K15868788	SDZ-205-557	Serotonin receptor antagonist
4172	-15	cp	BRD-K34508425	KUC103898N	-666
4171	-14.99	cp	BRD-K92015269	GBR-12783	Dopamine uptake inhibitor
4170	-14.97	cp	BRD-K17674993	diflorasone	Corticosteroid agonist
4162	-14.73	cp	BRD-K37865504	LY-2183240	FAAH inhibitor
4157	-14.67	cp	BRD-K31054881	BMY-7378	Adrenergic receptor antagonist
4155	-14.62	cp	BRD-K88568253	iproniazid	Monoamine oxidase inhibitor
4137	-14.27	cp	BRD-K59273480	propentofylline	Adenosine reuptake inhibitor
4136	-14.24	cp	BRD-A47633927	NPC-15199	ICAM1 antagonist
4128	-14.15	cp	BRD-K86600316	RS-79948	Adrenergic receptor antagonist
4127	-14.13	cp	BRD-A48237631	mitomycin-c	DNA alkylating agent
4126	-14.12	cp	BRD-A64977602	mirtazapine	Adrenergic receptor antagonist
4124	-14.09	cp	BRD-K63874012	thioperamide	Histamine receptor antagonist
4121	-14.05	cp	BRD-K32247306	primidone	GABA receptor antagonist
4117	-14.01	cp	BRD-K32292990	CGP-53353	EGFR inhibitor
4119	-14.01	cp	BRD-A25004090	erastin	Ion channel antagonist
4107	-13.77	cp	BRD-K60184833	tyrphostin-46	Tyrosine kinase inhibitor
4105	-13.75	cp	BRD-K72726508	arcyriaflavin-a	CDK inhibitor
4102	-13.74	cp	BRD-A49734948	foliosidine	Plant alkaloid
4095	-13.62	cp	BRD-A74904029	EI-231	Casein kinase inhibitor
4096	-13.62	cp	BRD-A30205217	ethotoin	Hydantoin antiepileptic
4090	-13.56	cp	BRD-A23683907	NAS-181	Serotonin receptor antagonist
4088	-13.53	cp	BRD-A34706053	CGP-12177	Adrenergic receptor agonist
4085	-13.47	cp	BRD-K51018020	VAMA-37	DNA dependent protein kinase inhibitor
4069	-13.14	cp	BRD-K82983861	GW-0742	PPAR receptor agonist
4068	-13.07	cp	BRD-A62525898	prednisone	Glucocorticoid receptor agonist
4065	-13.01	cp	BRD-K52850071	JAK3-Inhibitor-II	JAK inhibitor
4061	-12.91	cp	BRD-K77286328	reversine	Aurora kinase inhibitor
4060	-12.85	cp	BRD-K19136521	indirubin	CDK inhibitor
4056	-12.73	cp	BRD-K96084870	DMBI	PDGFR receptor inhibitor
4044	-12.34	cp	BRD-K15616905	CCCP	Mitochondrial oxidative phosphorylation uncoupler
4042	-12.3	cp	BRD-A31007383	SDZ-WAG-994	Adenosine receptor agonist
4037	-12.21	cp	BRD-K43880410	pregnenolone	glutamate receptor modulator
4030	-12.12	cp	BRD-K86509404	iso-olomoucine	CDK inhibitor
4029	-12.11	cp	BRD-K81209512	AG-494	EGFR inhibitor
4026	-12.08	cp	BRD-K89930444	AG-592	Tyrosine kinase inhibitor
4024	-12.04	cp	BRD-A82096673	KU-C103428N	CDC inhibitor
4023	-11.98	cp	BRD-K06712146	YM-90709	IL5 inhibitor
4020	-11.91	cp	BRD-A41722204	sulmazole	Adenosine receptor antagonist
4018	-11.85	cp	BRD-A54490543	pirlindole	Monoamine oxidase inhibitor
4011	-11.7	cp	BRD-K79145749	dibenzepin	Norepinephrine reuptake inhibitor
4010	-11.69	cp	BRD-K42098891	protriptyline	Tricyclic antidepressant
4009	-11.66	cp	BRD-A16694057	bisphenol-a	PPAR receptor antagonist
4008	-11.63	cp	BRD-A01826957	xanthinol	Vasodilator
4007	-11.6	cp	BRD-K57304726	PRE-084	Sigma receptor agonist
4001	-11.47	cp	BRD-K28346421	rifapentine	RNA polymerase inhibitor
4000	-11.44	cp	BRD-K37447567	hydrocotarnine	Opioid receptor antagonist
3999	-11.42	cp	BRD-K11540476	EMF-BCA1-64	Caspase inhibitor
3995	-11.37	cp	BRD-K33583600	isoliquiritigenin	Guanylate cyclase activator
3991	-11.31	cp	BRD-K34092021	arvanil	TRPV agonist
3989	-11.26	cp	BRD-K40255344	tyrphostin-A9	Protein tyrosine kinase inhibitor
3986	-11.1	cp	BRD-A81233518	glycopyrrolate	Acetylcholine receptor antagonist
3984	-11.09	cp	BRD-K46937689	phenazone	Cyclooxygenase inhibitor
3980	-11	cp	BRD-K59522102	piperine	Monoamine oxidase inhibitor
3976	-10.9	cp	BRD-K18036262	L-168049	Glucagon receptor antagonist
3975	-10.89	cp	BRD-K51476772	ST-638	Tyrosine kinase inhibitor
3964	-10.59	cp	BRD-K45033733	famciclovir	DNA polymerase inhibitor
3956	-10.37	cp	BRD-A70407468	PSB-36	Adenosine receptor antagonist
3947	-10.15	cp	BRD-K08890269	CO-102862	Sodium channel blocker
3943	-10.07	cp	BRD-A33168282	sotalol	Adrenergic receptor antagonist
3942	-10.05	cp	BRD-K50214219	CS-1657	PARP inhibitor
3940	-10.04	cp	BRD-K82823076	RO-15-4513	GABA benzodiazepine site receptor inverse agonist
3939	-10.01	cp	BRD-K61951118	FG-7142	GABA benzodiazepine site receptor inverse agonist
3938	-9.95	cp	BRD-A65282128	cefazolin	Bacterial cell wall synthesis inhibitor
3935	-9.84	cp	BRD-A99177642	deltaline	Acetylcholine receptor antagonist
3930	-9.71	cp	BRD-K57631554	aminolevulinic-acid	Oxidizing agent
3927	-9.62	cp	BRD-K26160755	RS-45041-190	Imidazoline receptor agonist
3917	-9.36	cp	BRD-K40782193	QX-222	Sodium channel blocker
3915	-9.25	cp	BRD-K10974103	diloxanide	Protein synthesis inhibitor
3909	-8.94	cp	BRD-K52930707	rescinnamine	ACE inhibitor
3906	-8.89	cp	BRD-K85242180	beta-CCP	Indoleamine 2,3-dioxygenase inhibitor
3904	-8.77	cp	BRD-K47679368	bromfenac	Cyclooxygenase inhibitor
3900	-8.74	cp	BRD-K52172416	anastrozole	Aromatase inhibitor
3892	-8.66	cp	BRD-A31801025	formestane	Aromatase inhibitor
3885	-8.54	cp	BRD-K99498722	NPI-2358	Tubulin inhibitor
3884	-8.52	cp	BRD-K83144676	olmesartan	Angiotensin antagonist
3883	-8.48	cp	BRD-K18742343	H-8	PKA inhibitor
3880	-8.45	cp	BRD-K88759641	EMD-66684	Angiotensin receptor antagonist
3875	-8.37	cp	BRD-K34533029	tyrphostin-AG-494	EGFR inhibitor
3846	-7.32	cp	BRD-A96897502	U-74389F	Lipid peroxidase inhibitor
3844	-7.23	cp	BRD-K32821942	azathioprine	Dehydrogenase inhibitor
3839	-7.13	cp	BRD-A54845972	dihydroergotamine	Serotonin receptor agonist
3835	-7.03	cp	BRD-K54314721	zolmitriptan	Serotonin receptor agonist
3825	-6.77	cp	BRD-K49456190	prima-1-met	thioredoxin inhibitor
3823	-6.69	cp	BRD-A30435184	metergoline	Dopamine receptor agonist
3820	-6.59	cp	BRD-K47192521	icosapent	Platelet aggregation inhibitor
3816	-6.45	cp	BRD-A10969569	ambelline	Plant alkaloid
3812	-6.28	cp	BRD-K44779798	miglitol	Glucosidase inhibitor
3804	-5.64	cp	BRD-K99696746	fatostatin	SREBP inhibitor
3798	-5.24	cp	BRD-K13544237	r(-)-propylnorapomorphine	Dopamine receptor agonist
3797	-5.23	cp	BRD-A15034104	bergenin	Interleukin inhibitor
3790	-4.81	cp	BRD-A96485169	EBPC	Aldose reductase inhibitor
3771	-3.88	cp	BRD-K10136726	tosyllysyl-chloromethyl-ketone	Chymotrypsin inhibitor
3769	-3.56	cp	BRD-K16664969	GTP-14564	FLT3 inhibitor
3767	-3.49	cp	BRD-K84955386	hyperoside	Glucosidase inhibitor
3766	-3.25	cp	BRD-A78942461	ICI-118551	Adrenergic receptor antagonist
3764	-3.07	cp	BRD-K42142750	retrorsine	Antimitotic
3759	-1.48	cp	BRD-A92585442	RU-28318	Cytochrome P450 inhibitor
3751	3.14	cp	BRD-K93658967	aloisine	CDK inhibitor
3749	3.28	cp	BRD-A47829399	artesunate	DNA synthesis inhibitor
3743	4.11	cp	BRD-K08287586	butylparaben	DNA synthesis inhibitor
3725	5.78	cp	BRD-A45333398	periplocymarin	Apoptosis stimulant
3724	5.94	cp	BRD-K50325075	UCL-2077	Slow after hyperpolarization channel blocker
3715	6.73	cp	BRD-K53979406	ALX-5407	Glycine transporter inhibitor
3705	7.14	cp	BRD-K91601245	mercaptopurine	Immunosuppressant
3697	7.46	cp	BRD-K62965247	tipifarnib-P2	farnesyltransferase inhibitor
3695	7.51	cp	BRD-A38747044	KU-14R	Imidazoline receptor ligand
3690	7.66	cp	BRD-K50938786	ropivacaine	Sodium channel blocker
3685	7.97	cp	BRD-A63998256	helveticoside	ATPase inhibitor
3682	8.09	cp	BRD-K71860425	CDK2-5-inhibitor	CDK inhibitor
3679	8.19	cp	BRD-K21936341	oxotremorine	Acetylcholine receptor agonist
3678	8.2	cp	BRD-K27665173	D-64406	PDGFR receptor inhibitor
3674	8.39	cp	BRD-A37776212	ICI-204448	Opioid receptor agonist
3671	8.65	cp	BRD-K76304753	phenazopyridine	Local anesthetic
3666	8.75	cp	BRD-K99922388	DPO-1	Potassium channel blocker
3665	8.78	cp	BRD-K53878242	MMPX	Phosphodiesterase inhibitor
3663	8.81	cp	BRD-K18523449	mestanolone	Androgenic steroid
3661	8.83	cp	BRD-K03384561	roquinimex	Angiogenesis inhibitor
3649	9.2	cp	BRD-K58772419	AZD-6482	PI3K inhibitor
3648	9.22	cp	BRD-A42346008	metanephrine	Epinephrine metabolite
3646	9.28	cp	BRD-K88551539	CAY-10585	HIF modulator
3643	9.4	cp	BRD-K26657438	imiquimod	TLR agonist
3641	9.42	cp	BRD-K40213712	SAL-1	Adenosine receptor antagonist
3636	9.55	cp	BRD-A04756508	norgestimate	Progesterone receptor agonist
3634	9.58	cp	BRD-U94846492	quinine	Hemozoin biocrystallization inhibitor
3631	9.7	cp	BRD-A56675431	altizide	Thiazide diuretic
3622	9.89	cp	BRD-K92301463	16,16-dimethylprostaglandin-e2	Prostanoid receptor agonist
3611	10.31	cp	BRD-K85402309	dovitinib	EGFR inhibitor
3607	10.45	cp	BRD-K63784565	BRD-K63784565	Topoisomerase inhibitor
3605	10.56	cp	BRD-A81795050	U-18666A	Oxidosqualene cyclase inhibitor
3603	10.59	cp	BRD-A41692738	TGX-221	PI3K inhibitor
3601	10.62	cp	BRD-K40919711	BAPTA-AM	Potassium channel blocker
3597	10.67	cp	BRD-A90799790	isradipine	Calcium channel blocker
3588	10.99	cp	BRD-K17008822	BD-1008	Sigma receptor antagonist
3586	11.07	cp	BRD-K83837640	JNJ-26854165	HDAC inhibitor
3584	11.16	cp	BRD-K62206109	VUF-5681	Histamine receptor antagonist
3581	11.25	cp	BRD-A75479906	rimantadine	Antiviral
3579	11.32	cp	BRD-A34817987	itraconazole	Cytochrome P450 inhibitor
3576	11.37	cp	BRD-K67298865	SB-431542	TGF beta receptor inhibitor
3575	11.47	cp	BRD-K51918615	iodophenpropit	Histamine receptor antagonist
3574	11.49	cp	BRD-A72703248	SKF-96365	Calcium channel blocker
3572	11.5	cp	BRD-K53220666	trimetozine	Sedative
3570	11.56	cp	BRD-A84389091	L-655708	GABA receptor inverse agonist
3569	11.59	cp	BRD-A90311807	cilastatin	Dehydropeptidase inhibitor
3567	11.68	cp	BRD-K26573499	DMAB-anabaseine	Adrenergic receptor agonist
3566	11.69	cp	BRD-K11399644	phenformin	AMPK activator
3563	11.79	cp	BRD-K06980535	promazine	Dopamine receptor antagonist
3558	12.02	cp	BRD-K68407802	KIN001-055	EGFR inhibitor
3551	12.32	cp	BRD-K93433262	alfacalcidol	Vitamin D receptor agonist
3550	12.33	cp	BRD-K04993501	cefixime	Bacterial cell wall synthesis inhibitor
3545	12.51	cp	BRD-K36377456	marmesin	Angiogenesis inhibitor
3543	12.56	cp	BRD-K97799481	theophylline	Adenosine receptor antagonist
3537	12.76	cp	BRD-A10355991	norketamine	Glutamate receptor antagonist
3535	12.79	cp	BRD-K66615216	moxifloxacin	Bacterial DNA gyrase inhibitor
3533	12.85	cp	BRD-K12994359	valdecoxib	Cyclooxygenase inhibitor
3531	12.93	cp	BRD-A72441487	stiripentol	GABA uptake inhibitor
3529	12.95	cp	BRD-A62809825	thapsigargin	ATPase inhibitor
3526	13.18	cp	BRD-A96107863	nisoldipine	Calcium channel blocker
3518	13.42	cp	BRD-A47144777	dihydro-7-desacetyldeoxygedunin	HSP inhibitor
3517	13.57	cp	BRD-K60762818	desipramine	Tricyclic antidepressant
3516	13.61	cp	BRD-K95901403	XL-147	PI3K inhibitor
3513	13.67	cp	BRD-K06208435	YS-035	Calcium channel blocker
3509	13.73	cp	BRD-K48722833	iloperidone	Dopamine receptor antagonist
3510	13.73	cp	BRD-K00656370	6-aminochrysene	Transferase inhibitor
3500	14.02	cp	BRD-A00100033	nifurtimox	DNA inhibitor
3499	14.1	cp	BRD-K21548250	moracizine	Sodium channel blocker
3497	14.17	cp	BRD-K99029477	prometon	Photosynthesis inhibitor
3493	14.31	cp	BRD-K05151076	ZK-164015	Estrogen receptor antagonist
3490	14.34	cp	BRD-K48735772	PD-158780	EGFR inhibitor
3488	14.39	cp	BRD-A24429032	HEAT	Adrenergic receptor antagonist
3484	14.6	cp	BRD-K67831364	ZM-323881	VEGFR inhibitor
3482	14.7	cp	BRD-A19053259	pseudopelletierine	Anthelmintic
3471	15.06	cp	BRD-K71035033	masitinib	KIT inhibitor
3458	15.5	cp	BRD-K79425933	benperidol	Dopamine receptor antagonist
3456	15.57	cp	BRD-K05977823	tenovins	SIRT inhibitor
3453	15.68	cp	BRD-K45158365	valsartan	Angiotensin receptor antagonist
3449	15.79	cp	BRD-A01145011	zebularine	DNA methyltransferase inhibitor
3448	15.85	cp	BRD-K32755366	reserpic-acid	Norepinephrine transporter inhibitor
3447	15.89	cp	BRD-A21723284	naltriben	Opioid receptor antagonist
3442	16.07	cp	BRD-K17378184	prestwick-559	Dopamine receptor agonist
3441	16.09	cp	BRD-K22227508	targinine	Nitric oxide synthase inhibitor
3439	16.17	cp	BRD-K41445866	alfaxalone	Chloride channel agonist
3435	16.39	cp	BRD-K47207162	zimelidine	Serotonin reuptake inhibitor
3433	16.4	cp	BRD-K00337317	NU-7441	DNA dependent protein kinase inhibitor
3428	16.53	cp	BRD-K30677119	PP-30	RAF inhibitor
3427	16.59	cp	BRD-K11129031	gemfibrozil	Lipoprotein lipase activator
3424	16.69	cp	BRD-K02607075	tubocurarine	Acetylcholine receptor antagonist
3422	16.73	cp	BRD-K80325895	eicosadienoic-acid	-666
3421	16.76	cp	BRD-K11636097	JNJ-7706621	CDK inhibitor
3420	16.8	cp	BRD-K64835161	BRD-K64835161	-666
3418	16.86	cp	BRD-K53913732	SB-408124	Orexin receptor antagonist
3413	17.08	cp	BRD-K73109821	diazoxide	Potassium channel activator
3412	17.1	cp	BRD-K30189597	SYK-inhibitor	SYK inhibitor
3411	17.12	cp	BRD-K26818574	BIX-01294	Histone lysine methyltransferase inhibitor
3410	17.13	cp	BRD-K40619305	larixinic-acid	Compound that interacts with metal centers
3406	17.15	cp	BRD-K37798499	etoposide	Topoisomerase inhibitor
3407	17.15	cp	BRD-K57222227	indometacin	Cyclooxygenase inhibitor
3405	17.27	cp	BRD-K47278471	diphenhydramine	Histamine receptor antagonist
3394	17.55	cp	BRD-K82865713	prostaglandin-b2	cAMP inhibitor
3395	17.55	cp	BRD-K30867024	SB-216641	Serotonin receptor antagonist
3391	17.68	cp	BRD-K11163873	phenanthridone	PARP inhibitor
3387	17.83	cp	BRD-A35033682	eriodictyol	Cytochrome P450 inhibitor
3386	17.85	cp	BRD-K02123250	JNJ-38877605	Tyrosine kinase inhibitor
3385	17.89	cp	BRD-K55677650	CO-101244	Ionotropic glutamate receptor antagonist
3377	18.14	cp	BRD-K73991644	isoquercetin	Aldose reductase inhibitor
3376	18.28	cp	BRD-K97181089	amiloride	Sodium channel blocker
3375	18.29	cp	BRD-K38436528	imipramine	Norepinephrine reuptake inhibitor
3373	18.3	cp	BRD-K66353228	zoxazolamine	Myorelaxant
3372	18.32	cp	BRD-K64994968	progesterone	Progesterone receptor agonist
3369	18.39	cp	BRD-K88789588	letrozole	Aromatase inhibitor
3366	18.45	cp	BRD-K73824630	skatole	Thrombin inhibitor
3367	18.45	cp	BRD-A97437073	rosiglitazone	Insulin sensitizer
3364	18.54	cp	BRD-K30697463	desoximetasone	Glucocorticoid receptor agonist
3363	18.56	cp	BRD-K63945320	dihydrosamidin	Phospholipase inhibitor
3362	18.57	cp	BRD-K74195153	irsogladine	Phosphodiesterase inhibitor
3354	18.86	cp	BRD-K92446736	zatebradine	HCN channel blocker
3352	18.9	cp	BRD-A15131297	benazepril	ACE inhibitor
3350	18.96	cp	BRD-A08709697	heliotrine	Pyrrolizidine alkaloid
3349	18.98	cp	BRD-A62182663	YK-4279	Apoptosis stimulant
3341	19.2	cp	BRD-K89125793	tinidazole	Antiprotozoal
3340	19.29	cp	BRD-A77291778	cyclopentolate	Acetylcholine receptor antagonist
3331	19.54	cp	BRD-K77677632	SB-200646	Serotonin receptor antagonist
3332	19.54	cp	BRD-K18574842	nafcillin	Bacterial cell wall synthesis inhibitor
3330	19.61	cp	BRD-K11558771	droxinostat	HDAC inhibitor
3326	19.69	cp	BRD-K17561142	amiodarone	Potassium channel blocker
3325	19.74	cp	BRD-K64755930	etazolate	Phosphodiesterase inhibitor
3322	19.86	cp	BRD-A77349281	RK-682	Tyrosine phosphatase inhibitor
3321	19.87	cp	BRD-K46211610	tolazoline	Adrenergic receptor antagonist
3320	19.91	cp	BRD-A00993607	alprenolol	Adrenergic receptor antagonist
3319	19.95	cp	BRD-K73391359	quinisocaine	Local anesthetic
3315	20.06	cp	BRD-K10042277	desmethylclozapine	Acetylcholine receptor agonist
3314	20.08	cp	BRD-K34441861	moexipril	ACE inhibitor
3309	20.2	cp	BRD-K76805682	SB-415286	Glycogen synthase kinase inhibitor
3302	20.34	cp	BRD-A84134924	pancuronium	Acetylcholine receptor antagonist
3303	20.34	cp	BRD-A18579359	wiskostatin	Neural Wiskott-Aldrich syndrome protein inhibitor
3297	20.54	cp	BRD-A15530910	carpindolol	Adrenergic receptor antagonist
3296	20.61	cp	BRD-K12867552	THM-I-94	HDAC inhibitor
3287	20.87	cp	BRD-K24526313	levcromakalim	Potassium channel activator
3286	20.92	cp	BRD-A38749782	fludrocortisone	Glucocorticoid receptor agonist
3285	20.93	cp	BRD-K49448285	bisindolylmaleimide	CDK inhibitor
3283	20.96	cp	BRD-K13926615	vardenafil	Phosphodiesterase inhibitor
3276	21.09	cp	BRD-K89055274	alverine	Muscle relaxant
3272	21.17	cp	BRD-K51575138	TPCA-1	IKK inhibitor
3270	21.25	cp	BRD-A30655177	LFM-A13	BTK inhibitor
3266	21.38	cp	BRD-K83010055	VU-0415374-1	Glutamate receptor modulator
3257	21.61	cp	BRD-K00234327	RU-24969	Serotonin receptor agonist
3243	22.23	cp	BRD-K01902415	pirinixic-acid	PPAR receptor agonist
3237	22.41	cp	BRD-A35511923	L-803087	Somatostatin receptor agonist
3232	22.6	cp	BRD-K84709232	caffeic-acid	Lipoxygenase inhibitor
3229	22.74	cp	BRD-K26117720	gingerol	Nitric oxide synthase inhibitor
3227	22.76	cp	BRD-K44876623	zolpidem	Benzodiazepine receptor agonist
3228	22.76	cp	BRD-K61192372	capecitabine	DNA synthesis inhibitor
3224	22.81	cp	BRD-K27141178	SB-203186	Serotonin receptor antagonist
3222	22.85	cp	BRD-K28470988	L-690330	Inositol monophosphatase inhibitor
3216	22.95	cp	BRD-K62056274	quipazine	Serotonin receptor agonist
3211	23.07	cp	BRD-K73978287	hydrocortisone	Glucocorticoid receptor agonist
3207	23.15	cp	BRD-K85985071	ellipticine	Topoisomerase inhibitor
3206	23.16	cp	BRD-K69650333	idarubicin	Topoisomerase inhibitor
3205	23.17	cp	BRD-K79930101	GW-583340	EGFR inhibitor
3204	23.22	cp	BRD-A45664787	iloprost	Platelet aggregation inhibitor
3202	23.28	cp	BRD-K82484965	carmoxirole	Dopamine receptor agonist
3201	23.33	cp	BRD-A29644307	nomifensine	Dopamine uptake inhibitor
3199	23.34	cp	BRD-K54708045	nTZDpa	PPAR receptor agonist
3198	23.36	cp	BRD-K30197592	5-methoxytryptamine	Serotonin receptor agonist
3197	23.41	cp	BRD-K47598052	PP-1	SRC inhibitor
3195	23.5	cp	BRD-K02265150	amoxapine	Norepinephrine reuptake inhibitor
3192	23.56	cp	BRD-K75641298	metoclopramide	Dopamine receptor antagonist
3186	23.69	cp	BRD-A92177080	betamethasone	Glucocorticoid receptor agonist
3184	23.71	cp	BRD-A66199457	asiaticoside	Antineoplastic
3178	23.87	cp	BRD-K27305650	LY-294002	MTOR inhibitor
3176	23.97	cp	BRD-K05464208	JX-401	p38 MAPK inhibitor
3173	24.1	cp	BRD-K46317332	proadifen	Nitric oxide synthase inhibitor
3171	24.13	cp	BRD-A73909368	dactinomycin	RNA polymerase inhibitor
3169	24.16	cp	BRD-K35723520	darinaparsin	Apoptosis stimulant
3167	24.17	cp	BRD-A59303141	quinethazone	Thiazide diuretic
3165	24.23	cp	BRD-K41713976	E-4031	Potassium channel blocker
3160	24.39	cp	BRD-A09056319	alfuzosin	Adrenergic receptor antagonist
3159	24.41	cp	BRD-K94270326	ecopipam	Dopamine receptor antagonist
3151	24.55	cp	BRD-K28120222	parthenolide	NFkB pathway inhibitor
3146	24.59	cp	BRD-K68264559	brimonidine	Adrenergic receptor agonist
3135	24.86	cp	BRD-A07000685	hydrocortisone	Glucocorticoid receptor agonist
3131	24.95	cp	BRD-K53263234	CITCO	CAR agonist
3128	25.12	cp	BRD-K68997413	PF-3845	FAAH inhibitor
3126	25.18	cp	BRD-K75615183	talipexole	Adrenergic receptor agonist
3122	25.28	cp	BRD-K60476892	YC-1	Guanylyl cyclase activator
3118	25.32	cp	BRD-K13211965	L-741742	Dopamine receptor antagonist
3117	25.33	cp	BRD-A97479839	piperidolate	Acetylcholine receptor antagonist
3116	25.34	cp	BRD-K06159959	CCMQ	Inhibitor of the binding of homoquinolinic acid to non-NMDA sensitive sites
3114	25.35	cp	BRD-K38615104	A-443644	AKT inhibitor
3111	25.41	cp	BRD-K16621777	enobosarm	Androgen receptor modulator
3107	25.58	cp	BRD-A95513702	androsta-1,4-dien-3,17-dione	Aromatase inhibitor
3100	25.77	cp	BRD-K31987754	oleylethanolamide	Cannabinoid receptor agonist
3091	25.98	cp	BRD-K47639036	flavoxate	Acetylcholine receptor antagonist
3089	26.05	cp	BRD-K04414442	SB-222200	Tachykinin antagonist
3088	26.06	cp	BRD-A55594068	vinblastine	Microtubule inhibitor
3085	26.13	cp	BRD-K07888107	depudecin	HDAC inhibitor
3077	26.25	cp	BRD-K53561341	KIN001-220	Aurora kinase inhibitor
3076	26.29	cp	BRD-K64451768	GANT-58	GLI antagonist
3075	26.32	cp	BRD-K69840642	ISOX	HDAC inhibitor
3073	26.36	cp	BRD-K00184207	GR-206	Aryl hydrocarbon receptor ligand
3071	26.46	cp	BRD-K68341547	W-9	Calmodulin antagonist
3070	26.47	cp	BRD-A41941932	vitexin	Antioxidant
3066	26.58	cp	BRD-K33211335	dextromethorphan	Glutamate receptor antagonist
3061	26.64	cp	BRD-K95785537	PP-2	SRC inhibitor
3056	26.74	cp	BRD-K69690935	curcumin	Cyclooxygenase inhibitor
3052	26.82	cp	BRD-K07325606	hispidin	PKC inhibitor
3053	26.82	cp	BRD-K68103045	CGS-20625	Benzodiazepine receptor agonist
3049	26.86	cp	BRD-K14200658	syrosingopine	Vesicular monoamine transporter inhibitor
3048	26.9	cp	BRD-A76093993	cromakalim	Potassium channel activator
3045	26.98	cp	BRD-A49225603	alimemazine	Histamine receptor agonist
3038	27.16	cp	BRD-K70358946	aripiprazole	Serotonin receptor agonist
3034	27.27	cp	BRD-K64670467	JNJ-16259685	Glutamate receptor antagonist
3031	27.29	cp	BRD-K64857848	XMD-885	Leucine rich repeat kinase inhibitor
3026	27.41	cp	BRD-K88701661	dimercaptosuccinic-acid	Chelating agent
3024	27.42	cp	BRD-K18618618	cimetidine	Histamine receptor antagonist
3021	27.48	cp	BRD-K85503079	perospirone	Dopamine receptor antagonist
3017	27.55	cp	BRD-A87479750	tenidap	Cyclooxygenase inhibitor
3011	27.62	cp	BRD-A39522003	OMDM-2	FAAH inhibitor
3010	27.64	cp	BRD-K79254416	decitabine	DNA methyltransferase inhibitor
3009	27.68	cp	BRD-K77390737	xanthohumol	ATPase inhibitor
3002	27.8	cp	BRD-K64614248	salicin	Anti-inflammatory
2999	27.88	cp	BRD-A68929948	DAPT-GSI-IX	Gamma secretase inhibitor
2998	27.91	cp	BRD-K67102207	phenylbutyrate	HDAC inhibitor
2996	27.93	cp	BRD-K74112339	acetohydroxamic-acid	Urease inhibitor
2993	27.97	cp	BRD-A20589515	dihydroxyphenylglycine	Glutamate receptor agonist
2992	27.98	cp	BRD-K77008974	WYE-354	MTOR inhibitor
2988	28.21	cp	BRD-K81521265	dicyclohexylurea	Epoxide hydolase inhibitor
2986	28.29	cp	BRD-K33106058	cytarabine	Ribonucleotide reductase inhibitor
2978	28.52	cp	BRD-K73999723	telmisartan	Angiotensin receptor antagonist
2977	28.56	cp	BRD-K55424922	anpirtoline	Serotonin receptor agonist
2974	28.61	cp	BRD-A01593789	chlormadinone	5-alpha reductase inhibitor
2973	28.64	cp	BRD-K55420858	mirin	MRE11A exonuclease inhibitor
2972	28.67	cp	BRD-K28453807	nitrocaramiphen	Cholinergic receptor antagonist
2971	28.7	cp	BRD-K96740444	itopride	Dopamine receptor antagonist
2969	28.76	cp	BRD-A30590053	MR-16728	Acetylcholine release enhancer
2963	28.96	cp	BRD-K48367671	febuxostat	Xanthine oxidase inhibitor
2952	29.27	cp	BRD-K10670311	sulfasalazine	Antirheumatic
2951	29.31	cp	BRD-K96862998	pirfenidone	TGF beta receptor inhibitor
2943	29.46	cp	BRD-K83794624	pirarubicin	Topoisomerase inhibitor
2941	29.47	cp	BRD-K84895041	BMY-45778	IP1 prostacyclin receptor agonist
2936	29.53	cp	BRD-K16977723	PP-3	EGFR inhibitor
2923	29.89	cp	BRD-A39646320	HC-toxin	HDAC inhibitor
2922	29.93	cp	BRD-A31227688	kynuramine	Aryl hydrocarbon receptor activator
2920	30	cp	BRD-K32584078	BML-257	AKT inhibitor
2919	30.04	cp	BRD-A80638690	floxuridine	DNA synthesis inhibitor
2913	30.13	cp	BRD-A24122750	saclofen	GABA receptor antagonist
2912	30.15	cp	BRD-K17306061	aprepitant	Tachykinin antagonist
2910	30.16	cp	BRD-K36627727	tamibarotene	Retinoid receptor agonist
2904	30.28	cp	BRD-K98493452	honokiol	AKT inhibitor
2901	30.4	cp	BRD-K38323065	phenacetin	Cyclooxygenase inhibitor
2900	30.41	cp	BRD-K16551401	PNU-22394	Serotonin receptor agonist
2898	30.45	cp	BRD-K05350981	oligomycin-c	ATPase inhibitor
2887	30.82	cp	BRD-K22662435	ganciclovir	DNA polymerase inhibitor
2885	30.91	cp	BRD-A49172652	lansoprazole	ATPase inhibitor
2881	31.05	cp	BRD-K14767410	SC-560	Cyclooxygenase inhibitor
2876	31.14	cp	BRD-K32501161	vanoxerine	Dopamine uptake inhibitor
2874	31.15	cp	BRD-K74913225	brinzolamide	Carbonic anhydrase inhibitor
2870	31.22	cp	BRD-K35941380	methysergide	Serotonin receptor antagonist
2869	31.24	cp	BRD-K15933101	ropinirole	Dopamine receptor agonist
2866	31.26	cp	BRD-K26801045	pipamperone	Dopamine receptor antagonist
2867	31.26	cp	BRD-K54210043	NS-1619	Calcium channel activator
2863	31.32	cp	BRD-K77771411	moxonidine	Imidazoline receptor agonist
2862	31.33	cp	BRD-K28115081	apafant	Platelet activating factor receptor antagonist
2855	31.45	cp	BRD-A07440155	labetalol	Adrenergic receptor antagonist
2850	31.55	cp	BRD-K92678294	irilin-a	Isoflavone
2848	31.57	cp	BRD-K20338176	cefaclor	Bacterial cell wall synthesis inhibitor
2849	31.57	cp	BRD-K47693913	evoxine	Furoquinoline alkaloid
2842	31.7	cp	BRD-A14574269	UB-165	Acetylcholine receptor agonist
2841	31.74	cp	BRD-K05104363	PD-184352	MEK inhibitor
2839	31.76	cp	BRD-A59174698	ritodrine	Adrenergic receptor agonist
2837	31.82	cp	BRD-A51382177	fosinopril	ACE inhibitor
2833	31.87	cp	BRD-A51714012	venlafaxine	Adrenergic inhibitor
2830	31.96	cp	BRD-K64402243	ivachtin	Caspase inhibitor
2826	32.04	cp	BRD-K56558538	ambroxol	Sodium channel blocker
2818	32.28	cp	BRD-K73589491	nizatidine	Histamine receptor antagonist
2816	32.34	cp	BRD-A06390036	hydroquinidine	Antiarrhythmic
2812	32.53	cp	BRD-K11927976	ER-27319	Mediator release inhibitor
2813	32.53	cp	BRD-K68620903	dydrogesterone	Progesterone receptor agonist
2807	32.6	cp	BRD-A93255169	thalidomide	TNF production inhibitor
2803	32.67	cp	BRD-K53570330	carbofuran	Cholinesterase inhibitor
2799	32.86	cp	BRD-A89175223	bisoprolol	Adrenergic receptor antagonist
2798	32.88	cp	BRD-A36066264	estradiol-benzoate	Estrogen receptor agonist
2795	33.02	cp	BRD-K99818283	PIK-90	PI3K inhibitor
2789	33.12	cp	BRD-K19554809	MK-212	Serotonin receptor agonist
2788	33.13	cp	BRD-K10466330	AVA	Nucleophosmin inhibitor
2780	33.39	cp	BRD-K42095107	daidzein	Estrogen receptor agonist
2779	33.4	cp	BRD-K22385716	LY-303511	Casein kinase inhibitor
2777	33.44	cp	BRD-A02710418	meptazinol	Opioid receptor agonist
2774	33.5	cp	BRD-K28307902	flutamide	Androgen receptor antagonist
2772	33.51	cp	BRD-K03842655	penitrem-a	Potassium channel blocker
2773	33.51	cp	BRD-K77925998	quipazine	Serotonin receptor agonist
2769	33.54	cp	BRD-A50764878	MDL-73005EF	Serotonin receptor antagonist
2768	33.56	cp	BRD-K91623615	ABT-751	Tubulin inhibitor
2767	33.6	cp	BRD-K34776109	glimepiride	Insulin secretagogue
2761	33.72	cp	BRD-K02715688	hydrastine	Tyrosine hydroxylase inhibitor
2759	33.82	cp	BRD-K85013741	auraptene	Nitric oxide production inhibitor
2753	34.04	cp	BRD-K57179821	crotamiton	Antipruritic
2752	34.07	cp	BRD-K86301799	dipyridamole	Phosphodiesterase inhibitor
2747	34.25	cp	BRD-A95939040	sertaconazole	Sterol demethylase inhibitor
2745	34.28	cp	BRD-A48261811	argatroban	Thrombin inhibitor
2742	34.32	cp	BRD-K05901394	terguride	Dopamine receptor agonist
2741	34.33	cp	BRD-K76775527	nimesulide	Cyclooxygenase inhibitor
2739	34.39	cp	BRD-K32610195	androstenedione	Cytochrome P450 inhibitor
2737	34.46	cp	BRD-K99447003	enalaprilat	ACE inhibitor
2733	34.63	cp	BRD-K07996107	harpagoside	Acetylcholinesterase inhibitor
2728	34.77	cp	BRD-A10523515	GSK-429286A	Rho associated kinase inhibitor
2727	34.82	cp	BRD-A46179541	doxapram	Potassium channel blocker
2723	35.03	cp	BRD-A41145729	methoprene-acid	Retinoid receptor agonist
2717	35.21	cp	BRD-A57382968	piroxicam	Cyclooxygenase inhibitor
2716	35.32	cp	BRD-K61269089	daphnetin	Protein kinase inhibitor
2711	35.56	cp	BRD-K28863208	PNU-282987	Cholinergic receptor agonist
2712	35.56	cp	BRD-K13032584	procarbazine	Monoamine oxidase inhibitor
2695	36.09	cp	BRD-K28183345	proguanil	Dihydrofolate reductase inhibitor
2693	36.1	cp	BRD-K36638830	anabasine	Acetylcholine receptor agonist
2691	36.16	cp	BRD-K56700933	phenethyl-isothiocyanate	Antineoplastic
2692	36.16	cp	BRD-K94841585	emodic-acid	Laxative
2686	36.37	cp	BRD-K67017579	cilostazol	Phosphodiesterase inhibitor
2684	36.4	cp	BRD-K46435977	valaciclovir	DNA polymerase inhibitor
2685	36.4	cp	BRD-K46068882	eugenitol	Bacterial quorum sensing inhibitor
2683	36.43	cp	BRD-K49865102	PD-0325901	MEK inhibitor
2682	36.45	cp	BRD-K40656405	L-165041	PPAR receptor agonist
2681	36.47	cp	BRD-K64935403	ebelactone-b	Lipase inhibitor
2680	36.48	cp	BRD-A36267905	buphenine	Adrenergic receptor agonist
2677	36.55	cp	BRD-K66956375	oleoylethanolamide	Cannabinoid receptor agonist
2666	36.8	cp	BRD-K75958195	pizotifen	Serotonin receptor antagonist
2664	36.93	cp	BRD-K93280214	gabazine	GABA receptor antagonist
2660	37.11	cp	BRD-K89997465	chlorpromazine	Dopamine receptor antagonist
2659	37.12	cp	BRD-A10303790	talampicillin	Bacterial cell wall synthesis inhibitor
2656	37.21	cp	BRD-K38477985	malonoben	Protein tyrosine kinase inhibitor
2654	37.25	cp	BRD-K01612348	meropenem	Bacterial cell wall synthesis inhibitor
2650	37.33	cp	BRD-K35240538	methylprednisolone	Glucocorticoid receptor agonist
2648	37.35	cp	BRD-A03216249	mepivacaine	Potassium channel blocker
2647	37.39	cp	BRD-K74236984	UNC-0321	Histone lysine methyltransferase inhibitor
2644	37.47	cp	BRD-K97056771	HY-11007	BCR-ABL kinase inhibitor
2642	37.49	cp	BRD-K43330982	JTE-013	Lysophospholipid receptor antagonist
2630	37.73	cp	BRD-K43245338	MDL-28170	Calpain inhibitor
2625	37.97	cp	BRD-K97399794	quercetin	Polar auxin transport inhibitor
2623	38	cp	BRD-K89210380	biotin	Vitamin B
2622	38.04	cp	BRD-K23369905	oxiconazole	Bacterial cell wall synthesis inhibitor
2619	38.11	cp	BRD-K61737877	VEGF-receptor-2-kinase-inhibitor-IV	VEGFR inhibitor
2620	38.11	cp	BRD-A65280694	molindone	Dopamine receptor antagonist
2614	38.3	cp	BRD-A60070924	alpha-estradiol	Estrogen receptor agonist
2613	38.32	cp	BRD-K41731458	triclosan	Enoyl-[acyl-carrier-protein] reductase [NADH] inhibitor
2611	38.37	cp	BRD-K32311154	nifekalant	Potassium channel blocker
2610	38.41	cp	BRD-A43331270	niguldipine	Calcium channel blocker
2606	38.5	cp	BRD-A44133049	azasetron	Serotonin receptor antagonist
2604	38.53	cp	BRD-A34751532	homosalate	HSP inducer
2603	38.54	cp	BRD-K07888196	tyrphostin-AG-538	IGF-1 inhibitor
2599	38.72	cp	BRD-K63533170	AM-630	Cannabinoid receptor antagonist
2592	38.93	cp	BRD-K61177364	NBI-27914	CRF receptor antagonist
2590	39.01	cp	BRD-K33864865	LY-225910	CCK receptor antagonist
2587	39.16	cp	BRD-K89014967	AS-703026	MEK inhibitor
2584	39.27	cp	BRD-K23583188	lavendustin-a	EGFR inhibitor
2578	39.48	cp	BRD-K70301876	escitalopram	Selective serotonin reuptake inhibitor (SSRI)
2576	39.6	cp	BRD-K79131256	albendazole	Anthelmintic
2573	39.67	cp	BRD-K68867920	quetiapine	Dopamine receptor antagonist
2558	40.07	cp	BRD-K83023055	GR-135531	Melatonin receptor agonist
2557	40.08	cp	BRD-A25143711	hydrocortisone	Glucocorticoid receptor agonist
2555	40.1	cp	BRD-K01192156	tyrphostin-AG-112	Protein tyrosine kinase inhibitor
2554	40.11	cp	BRD-K71731651	PNU-120596	Acetylcholine receptor agonist
2547	40.18	cp	BRD-A51829654	BRL-15572	Serotonin receptor antagonist
2538	40.51	cp	BRD-K85925969	zalcitabine	Nucleoside reverse transcriptase inhibitor
2526	40.86	cp	BRD-A73581086	ergometrine	Adrenergic receptor agonist
2525	40.94	cp	BRD-A26711594	nicardipine	Calcium channel blocker
2522	40.95	cp	BRD-A82238138	budesonide	Glucocorticoid receptor agonist
2518	41.07	cp	BRD-K26997899	SA-792574	Microtubule inhibitor
2516	41.32	cp	BRD-A71009679	KUC103420N	-666
2511	41.42	cp	BRD-K56745457	azauridine	Antiviral
2512	41.42	cp	BRD-K09631521	thiotepa	Cytochrome P450 inhibitor
2507	41.61	cp	BRD-A83695761	chromanol	Potassium channel blocker
2506	41.62	cp	BRD-K70557564	zosuquidar	P-glycoprotein inhibitor
2504	41.72	cp	BRD-K11905747	spectinomycin	Bacterial 30S ribosomal subunit inhibitor
2501	41.79	cp	BRD-A11605036	thiocolchicoside	GABA receptor antagonist
2498	41.92	cp	BRD-K02965346	SU-11274	Hepatocyte growth factor receptor inhibitor
2494	42.01	cp	BRD-K99174507	cardiogenol-c	Cardiomyogenesis inducer
2491	42.13	cp	BRD-K52620403	STO-609	Calmodulin antagonist
2490	42.14	cp	BRD-K92778217	mefenamic-acid	Cyclooxygenase inhibitor
2480	42.45	cp	BRD-K84266862	BRL-50481	Phosphodiesterase inhibitor
2479	42.46	cp	BRD-K01567962	pyrazolanthrone	JNK inhibitor
2474	42.57	cp	BRD-K88741031	methyl-2,5-dihydroxycinnamate	EGFR inhibitor
2471	42.62	cp	BRD-K88677950	PD-198306	MAP kinase inhibitor
2472	42.62	cp	BRD-A50684349	fenoldopam	Dopamine receptor agonist
2461	42.79	cp	BRD-K75181824	acetyl-geranygeranyl-cysteine	Inhibitor of methyl esterification of geranylgeranylated proteins
2462	42.79	cp	BRD-K21971034	OM-137	Aurora kinase inhibitor
2459	42.87	cp	BRD-K62310379	fluticasone	Glucocorticoid receptor agonist
2458	42.88	cp	BRD-A71157293	fursultiamine	Vitamin B
2456	42.93	cp	BRD-K08589866	linsitinib	IGF-1 inhibitor
2454	42.96	cp	BRD-A68723818	brompheniramine	Histamine receptor antagonist
2452	42.97	cp	BRD-A49906757	scopolamine	Acetylcholine receptor antagonist
2451	42.98	cp	BRD-A17428743	BW-723C86	Serotonin receptor agonist
2444	43.11	cp	BRD-K26015241	ODQ	Guanylyl cyclase inhibitor
2443	43.12	cp	BRD-A53576514	orphenadrine	Acetylcholine receptor antagonist
2440	43.14	cp	BRD-K93325701	damnacanthal	SRC inhibitor
2439	43.18	cp	BRD-K49027941	PSB-1115	Adenosine receptor antagonist
2436	43.28	cp	BRD-K01815685	indole	aryl hydrocarbon receptor agonist
2435	43.29	cp	BRD-K91336023	mesulergine	Dopamine receptor agonist
2432	43.32	cp	BRD-K93461745	buspirone	Serotonin receptor agonist
2429	43.43	cp	BRD-A80017228	bendroflumethiazide	Sodium/potassium/chloride transporter inhibitor
2430	43.43	cp	BRD-K12762134	XAV-939	Tankyrase inhibitor
2428	43.44	cp	BRD-A02176148	tubaic-acid	Mitochondrial complex I inhibitor
2426	43.51	cp	BRD-K16233984	eriochrome-black-t	Azo dye
2421	43.69	cp	BRD-K32906660	bis-tyrphostin	EGFR inhibitor
2411	43.88	cp	BRD-K10995081	perphenazine	Dopamine receptor antagonist
2408	43.9	cp	BRD-A84389633	tropanyl-3,5-dimethylbenzoate	Serotonin receptor antagonist
2407	43.91	cp	BRD-A61793559	metolazone	Carbonic anhydrase inhibitor
2404	44	cp	BRD-K06926592	tretinoin	Retinoid receptor agonist
2390	44.63	cp	BRD-K16554956	PTB1	AMPK activator
2389	44.64	cp	BRD-K80725632	lavendustin-c	EGFR inhibitor
2380	44.87	cp	BRD-K57080016	selumetinib	MEK inhibitor
2378	44.88	cp	BRD-A56245458	reichstein	Androgen receptor antagonist
2376	44.89	cp	BRD-K67445247	flurofamide	Urease inhibitor
2373	44.93	cp	BRD-K53318339	vinpocetine	Phosphodiesterase inhibitor
2367	45.22	cp	BRD-A98702003	carbenoxolone	11-beta-HSD1 inhibitor
2365	45.27	cp	BRD-K55454768	TAS-301	Calcium-calmodulin dependent protein kinase inhibitor
2364	45.29	cp	BRD-A90515964	guaifenesin	Expectorant
2355	45.56	cp	BRD-K73589401	corticosterone	mineralocorticoid receptor agonist
2349	45.84	cp	BRD-A34208323	VU-0404997-2	Glutamate receptor modulator
2347	45.93	cp	BRD-K26664453	cytochalasin-b	Microtubule inhibitor
2345	45.95	cp	BRD-K62929068	6-benzylaminopurine	Purinergic receptor activator
2344	45.99	cp	BRD-K20714604	RS-56812	Serotonin receptor partial agonist
2343	46	cp	BRD-A92670106	tocainide	Sodium channel blocker
2323	46.64	cp	BRD-K21520694	sulfacetamide	PABA antagonist
2321	46.67	cp	BRD-K05673000	dicloxacillin	Bacterial cell wall synthesis inhibitor
2319	46.7	cp	BRD-K55748775	SCH-28080	ATPase inhibitor
2318	46.71	cp	BRD-K59456551	methotrexate	Dihydrofolate reductase inhibitor
2314	46.81	cp	BRD-K08132273	tyrphostin	EGFR inhibitor
2315	46.81	cp	BRD-K82846253	repaglinide	Insulin secretagogue
2316	46.81	cp	BRD-A26384407	chlortalidone	Carbonic anhydrase inhibitor
2311	46.93	cp	BRD-K64746805	MBCQ	Phosphodiesterase inhibitor
2307	47.09	cp	BRD-K04548931	pidorubicine	Topoisomerase inhibitor
2301	47.29	cp	BRD-K36324071	NF-449	Purinergic receptor antagonist
2302	47.29	cp	BRD-K59037100	oxybenzone	Lipase inhibitor
2298	47.4	cp	BRD-A09161221	nomilin	HSP inhibitor
2293	47.59	cp	BRD-K15600710	obatoclax	BCL inhibitor
2292	47.6	cp	BRD-A17655518	ibuprofen	Cyclooxygenase inhibitor
2290	47.63	cp	BRD-A09828896	SKF-81297	Dopamine receptor agonist
2286	47.68	cp	BRD-K16444452	ibudilast	Leukotriene receptor antagonist
2284	47.71	cp	BRD-K04185004	oxybuprocaine	Local anesthetic
2282	47.74	cp	BRD-K18757346	U-46619	Thromboxane receptor agonist
2279	47.79	cp	BRD-A54236247	racephedrine	Adrenergic receptor agonist
2278	47.82	cp	BRD-K18816859	L-694247	Serotonin receptor agonist
2276	48.05	cp	BRD-K23623876	decafluorobutane	Contrast agent
2273	48.23	cp	BRD-K83597974	pargyline	Monoamine oxidase inhibitor
2271	48.3	cp	BRD-K21680192	mitoxantrone	Topoisomerase inhibitor
2267	48.45	cp	BRD-A70083328	secnidazole	Acetylcholinesterase inhibitor
2252	48.75	cp	BRD-K39823328	VU-0366037-2	Glutamate receptor modulator
2244	48.91	cp	BRD-A44008656	doxylamine	Histamine receptor antagonist
2243	48.92	cp	BRD-K52512893	SC-19220	Prostanoid receptor antagonist
2240	48.95	cp	BRD-K61480498	epoxycholesterol	LXR agonist
2241	48.95	cp	BRD-K12513978	fenbufen	Cyclooxygenase inhibitor
2242	48.95	cp	BRD-K82746043	navitoclax	BCL inhibitor
2237	49.01	cp	BRD-K25394294	oxaprozin	Cyclooxygenase inhibitor
2231	49.14	cp	BRD-K84996949	sinensetin	Cyclooxygenase inhibitor
2229	49.21	cp	BRD-A04327189	synephrine	Adrenergic receptor agonist
2226	49.26	cp	BRD-K01648091	LE-300	Dopamine receptor antagonist
2221	49.57	cp	BRD-A54029483	IRL-2500	Endothelin receptor antagonist
2219	49.67	cp	BRD-K87909389	alvocidib	CDK inhibitor
2217	49.72	cp	BRD-K82091397	SB-239063	p38 MAPK inhibitor
2216	49.73	cp	BRD-A26845397	isamoltan	Adrenergic receptor antagonist
2212	49.76	cp	BRD-K02867583	minaprine	Serotonin reuptake inhibitor
2210	49.78	cp	BRD-K77133231	PD-169316	p38 MAPK inhibitor
2205	49.94	cp	BRD-A88774919	doxycycline	Bacterial 30S ribosomal subunit inhibitor
2201	50.1	cp	BRD-A67373739	AICA-ribonucleotide	AMPK activator
2200	50.12	cp	BRD-K40742111	baeomycesic-acid	Lipoxygenase inhibitor
2193	50.25	cp	BRD-K52459643	prostaglandin-e1	Prostanoid receptor agonist
2189	50.35	cp	BRD-A51820102	econazole	Bacterial cell wall synthesis inhibitor
2188	50.37	cp	BRD-A55416093	colforsin	Adenylyl cyclase activator
2186	50.42	cp	BRD-A59808129	guggulsterone	Cholesterol inhibitor
2179	50.65	cp	BRD-K01253243	SB-590885	RAF inhibitor
2177	50.74	cp	BRD-K94080537	diethyltoluamide	DEET activator of fly antenna ionotropic receptor IR40a
2172	50.81	cp	BRD-K43860855	iobenguane	Antineoplastic
2170	50.84	cp	BRD-K31542390	mycophenolic-acid	Dehydrogenase inhibitor
2165	50.99	cp	BRD-K39569857	avrainvillamide-analog-3	nucleophosmin inhibitor
2161	51.22	cp	BRD-A88282067	delcorine	Antiarrhythmic
2154	51.35	cp	BRD-K81062487	taurocholic-acid	Bile acid
2150	51.41	cp	BRD-K48427617	U-0124	MEK inhibitor
2148	51.45	cp	BRD-A33084410	5'-guanidinonaltrindole	Opioid receptor antagonist
2147	51.46	cp	BRD-K47328134	lysylphenylalanyl-tyrosine	Heparin activation inhibitor
2142	51.56	cp	BRD-A39268308	epibatidine	Acetylcholine receptor agonist
2137	51.73	cp	BRD-K79684402	RO-10-5824	Dopamine receptor agonist
2135	51.8	cp	BRD-K23335153	AMN-082	Glutamate receptor modulator
2134	51.81	cp	BRD-K88849294	lobaric-acid	Tyrosine phosphatase inhibitor
2132	51.86	cp	BRD-K39120595	bithionol	Autotaxin inhibitor
2126	51.91	cp	BRD-K01638814	rilmenidine	Adrenergic receptor agonist
2127	51.91	cp	BRD-A45543382	metrizamide	Radiopaque medium
2123	52.06	cp	BRD-K85603128	resorcinol	Phosphodiesterase inhibitor
2121	52.1	cp	BRD-K17294426	clebopride	Dopamine receptor antagonist
2114	52.32	cp	BRD-K76064317	tyrphostin-AG-1296	FLT3 inhibitor
2111	52.43	cp	BRD-K37080523	isoreserpine	Vesicular monoamine transporter inhibitor
2105	52.64	cp	BRD-K32830106	guanfacine	Adrenergic receptor agonist
2101	52.7	cp	BRD-K15402119	huperzine-a	Acetylcholinesterase inhibitor
2100	52.8	cp	BRD-K12516989	zaprinast	Phosphodiesterase inhibitor
2095	52.87	cp	BRD-K43149758	myricetin	Androgen receptor agonist
2093	52.91	cp	BRD-K43887077	dopamine	Dopamine receptor agonist
2092	53	cp	BRD-A72483914	spiroxatrine	Serotonin receptor antagonist
2089	53.04	cp	BRD-A01295252	trans-7-hydroxy-pipat	Dopamine receptor ligand
2085	53.15	cp	BRD-K61097567	SB-218795	Tachykinin antagonist
2082	53.22	cp	BRD-A24514565	warfarin	Vitamin K antagonist
2080	53.26	cp	BRD-K18799075	BAY-59-3074	Cannabinoid receptor partial agonist
2077	53.3	cp	BRD-A41451487	PK-11195	Benzodiazepine receptor antagonist
2070	53.42	cp	BRD-K92428153	mycophenolate-mofetil	Dehydrogenase inhibitor
2068	53.44	cp	BRD-A53131506	epitestosterone	Inactive testosterone analog
2067	53.47	cp	BRD-K96471533	nitazoxanide	Pyruvate ferredoxin oxidoreductase inhibitor
2066	53.5	cp	BRD-K78278890	NM-PP1	Mutant kinase inhibitor
2063	53.53	cp	BRD-K02637541	celecoxib	Cyclooxygenase inhibitor
2061	53.6	cp	BRD-A65440446	cimaterol	Adrenergic receptor agonist
2059	53.61	cp	BRD-K33193182	methylnorlichexanthone	Aurora kinase inhibitor
2054	53.65	cp	BRD-K67680372	CI-966	GAT inhibitor
2051	53.77	cp	BRD-K68132782	terbinafine	Fungal squalene epoxidase inhibitor
2049	53.79	cp	BRD-K47761761	PD-168077	Dopamine receptor agonist
2045	53.89	cp	BRD-K09436313	prostaglandin	Prostanoid receptor antagonist
2041	54.08	cp	BRD-K89732114	trifluoperazine	Dopamine receptor antagonist
2039	54.23	cp	BRD-K24656285	farnesol	FXR agonist
2038	54.3	cp	BRD-K32795028	1-benzylimidazole	Thromboxane synthase inhibitor
2034	54.44	cp	BRD-A33833419	TER-14687	Inhibitor of translocation of PKCq in T cells
2026	54.57	cp	BRD-K78637815	LY-320135	Cannabinoid receptor antagonist
2024	54.59	cp	BRD-K12184916	dactolisib	MTOR inhibitor
2023	54.64	cp	BRD-K28761384	zuclopenthixol	Dopamine receptor antagonist
2019	54.68	cp	BRD-K72222507	quinapril	ACE inhibitor
2018	54.69	cp	BRD-K69763916	LY-341495	Glutamate receptor antagonist
2015	54.82	cp	BRD-K62982419	cilomilast	Phosphodiesterase inhibitor
2012	54.9	cp	BRD-A03359064	ICI-89406	Adrenergic receptor antagonist
2011	54.98	cp	BRD-K86873305	piperacillin	Bacterial cell wall synthesis inhibitor
2007	55.09	cp	BRD-K19360254	ergocornine	Dopamine receptor agonist
2003	55.2	cp	BRD-A07780951	orciprenaline	Adrenergic receptor agonist
2001	55.31	cp	BRD-K25906698	immepip	Histamine receptor agonist
1997	55.38	cp	BRD-K80527266	triacsin-c	Adrenergic receptor antagonist
1995	55.49	cp	BRD-K68332390	ponalrestat	Aldose reductase inhibitor
1992	55.52	cp	BRD-A35338386	NECA	Adenosine receptor agonist
1993	55.52	cp	BRD-A41995253	brucine	Glycine receptor antagonist
1988	55.6	cp	BRD-A80641450	FR-139317	Endothelin receptor antagonist
1979	55.74	cp	BRD-K63195589	tipifarnib	Farnesyltransferase inhibitor
1978	55.75	cp	BRD-K92991072	PAC-1	Caspase activator
1976	55.76	cp	BRD-A56987319	SQ-22536	Adenylyl cyclase inhibitor
1973	55.87	cp	BRD-K23913458	coumarin	Vitamin K antagonist
1971	55.94	cp	BRD-K99411983	lumicolchicine	Colchicine isomer, non-binder of microtubules
1970	55.95	cp	BRD-K37130656	rivaroxaban	Coagulation inhibitor
1968	56.02	cp	BRD-K62200014	anagrelide	Phosphodiesterase inhibitor
1967	56.05	cp	BRD-U73238814	QL-XI-92	DDR1 inhibitor
1966	56.07	cp	BRD-A32836748	leu-enkephalin	Opioid receptor agonist
1965	56.13	cp	BRD-K64785675	TG100-115	-666
1960	56.27	cp	BRD-K91900765	VX-745	p38 MAPK inhibitor
1954	56.5	cp	BRD-K11107424	tiotidine	Histamine receptor antagonist
1953	56.53	cp	BRD-K26548821	quinpirole	Dopamine receptor agonist
1951	56.6	cp	BRD-K31238592	devazepide	CCK receptor antagonist
1950	56.65	cp	BRD-A94793051	gestrinone	Progesterone receptor antagonist
1948	56.72	cp	BRD-K14880289	GW-501516	PPAR receptor agonist
1944	56.79	cp	BRD-K51485625	ritonavir	HIV protease inhibitor
1937	57.03	cp	BRD-K51751936	alfadolone	GABA receptor agonist
1936	57.11	cp	BRD-K59469039	AG-879	Angiogenesis inhibitor
1934	57.17	cp	BRD-K57569181	pentoxifylline	Phosphodiesterase inhibitor
1922	57.41	cp	BRD-A83855350	naltrexone	Opioid receptor antagonist
1920	57.42	cp	BRD-M30523314	vinorelbine	Tubulin inhibitor
1919	57.43	cp	BRD-K72024482	MRS-1754	Adenosine receptor antagonist
1918	57.45	cp	BRD-K12079898	PD-160170	Neuropeptide receptor antagonist
1915	57.54	cp	BRD-K20986251	lithocholic-acid	FXR antagonist
1911	57.6	cp	BRD-K01624546	docosatrienoic-acid	LTB4 inhibitor
1910	57.61	cp	BRD-K59597909	phenothiazine	Dopamine receptor antagonist
1901	57.87	cp	BRD-K79090631	CGP-60474	CDK inhibitor
1900	57.93	cp	BRD-K54416256	methimazole	Antithyroid
1899	57.99	cp	BRD-K81376179	TCS-359	FLT3 inhibitor
1896	58.13	cp	BRD-K39746403	erythromycin	NFkB pathway inhibitor
1893	58.15	cp	BRD-K52751261	TAK-715	p38 MAPK inhibitor
1890	58.3	cp	BRD-K27710560	splitomycin	SIRT inhibitor
1887	58.36	cp	BRD-K53790871	triamcinolone	Glucocorticoid receptor agonist
1883	58.38	cp	BRD-K44084986	Y-27632	Rho associated kinase inhibitor
1882	58.42	cp	BRD-K23192422	lestaurtinib	FLT3 inhibitor
1881	58.49	cp	BRD-K86434416	selegiline	Monoamine oxidase inhibitor
1876	58.56	cp	BRD-K68190965	GR-46611	Serotonin receptor agonist
1874	58.65	cp	BRD-A98378129	talniflumate	Cyclooxygenase inhibitor
1873	58.71	cp	BRD-K70976396	cefoxitin	Bacterial cell wall synthesis inhibitor
1871	58.75	cp	BRD-K24675965	LY-288513	CCK receptor antagonist
1869	58.78	cp	BRD-K21733600	rofecoxib	Cyclooxygenase inhibitor
1867	58.93	cp	BRD-A96456596	FPL-55712	Leukotriene receptor antagonist
1858	59.03	cp	BRD-K34415467	trimethobenzamide	Histamine receptor antagonist
1853	59.12	cp	BRD-K01663662	diphenidol	Acetylcholine receptor agonist
1851	59.17	cp	BRD-M40783228	mesna	Antioxidant
1847	59.37	cp	BRD-K63828191	raloxifene	Estrogen receptor antagonist
1840	59.47	cp	BRD-K67043667	altretamine	DNA synthesis inhibitor
1836	59.49	cp	BRD-K64514229	toltrazuril	Antiprotozoal
1826	59.84	cp	BRD-A02333338	cyclopamine	Smoothened receptor antagonist
1822	59.9	cp	BRD-A43150328	penicillic-acid	other antibiotic
1820	59.96	cp	BRD-K20313525	rosmarinic-acid	GABA transaminase inhibitor
1819	60	cp	BRD-A17819071	gedunin	HSP inhibitor
1817	60.01	cp	BRD-K73290745	ICI-199441	Opioid receptor agonist
1815	60.1	cp	BRD-K14643723	4-(2-Amino-ethyl)-benzenesulfonamide	carbonic anhydrase inhibitor
1816	60.1	cp	BRD-K98769987	flumazenil	Benzodiazepine receptor antagonist
1814	60.11	cp	BRD-A80928489	1-monopalmitin	P-glycoprotein inhibitor
1812	60.14	cp	BRD-A03816571	CP-55940	Cannabinoid receptor agonist
1813	60.14	cp	BRD-K59419204	AM-281	Cannabinoid receptor antagonist
1807	60.22	cp	BRD-K84085265	CG-930	JNK inhibitor
1804	60.33	cp	BRD-K03319035	maprotiline	Norepinephrine reuptake inhibitor
1802	60.38	cp	BRD-A31312900	montelukast	Leukotriene receptor antagonist
1798	60.42	cp	BRD-A72596465	GW-6471	PPAR receptor antagonist
1795	60.44	cp	BRD-A90131694	alclometasone	Glucocorticoid receptor agonist
1794	60.46	cp	BRD-K45446451	JZL-184	Monoacylglucerol lipase inhibitor
1781	60.74	cp	BRD-A26095496	clobetasol	Glucocorticoid receptor agonist
1778	60.85	cp	BRD-K86191271	cytosporone-b	NUR77 receptor agonist
1777	60.86	cp	BRD-K70241288	L-692585	Growth hormone releasing peptide ligand agonist
1768	61.03	cp	BRD-A41555725	chlortetracycline	Protein synthesis inhibitor
1769	61.03	cp	BRD-K00627859	tubastatin-a	HDAC inhibitor
1767	61.04	cp	BRD-K68402494	ML-9	Myosin light chain kinase inhibitor
1766	61.07	cp	BRD-K56343971	vemurafenib	RAF inhibitor
1763	61.15	cp	BRD-K43764301	dexketoprofen	Cyclooxygenase inhibitor
1762	61.16	cp	BRD-K43389675	daunorubicin	RNA synthesis inhibitor
1758	61.27	cp	BRD-K61993165	niacin	NAD precursor with lipid lowering effects
1759	61.27	cp	BRD-K04146668	GW-441756	Growth factor receptor inhibitor
1753	61.33	cp	BRD-K39339537	epirizole	Cyclooxygenase inhibitor
1751	61.36	cp	BRD-K48692744	NU-1025	PARP inhibitor
1749	61.37	cp	BRD-K63089472	farnesylthioacetic-acid	Inhibitor of methyl esterification of farnesylated proteins
1747	61.45	cp	BRD-K59851896	calycanthine	GABA release inhibitor
1744	61.47	cp	BRD-K77998258	ganglioside	SRC activator
1738	61.73	cp	BRD-K50866992	tropisetron	Serotonin receptor antagonist
1735	61.78	cp	BRD-K80738081	resveratrol	Cytochrome P450 inhibitor
1730	61.94	cp	BRD-K41859756	NVP-AUY922	HSP inhibitor
1727	62.02	cp	BRD-K10573841	tunicamycin	GLCNAC phosphotransferase inhibitor
1725	62.13	cp	BRD-K66206289	lobeline	Acetylcholine receptor antagonist
1722	62.18	cp	BRD-K05395900	nicotine	Acetylcholine receptor agonist
1710	62.4	cp	BRD-K87048468	RS-102221	Serotonin receptor antagonist
1693	62.93	cp	BRD-K71799949	carbamazepine	Carboxamide antiepileptic
1690	62.98	cp	BRD-K68095457	palmitoylethanolamide	Cannabinoid receptor agonist
1689	63.05	cp	BRD-K66766661	17-beta-estradiol	Estrogen receptor agonist
1687	63.1	cp	BRD-K63923597	barasertib	Aurora kinase inhibitor
1682	63.19	cp	BRD-K18135438	chenodeoxycholic-acid	11-beta-HSD1 inhibitor
1681	63.24	cp	BRD-K56614220	clofazimine	GK0582 inhibitor
1679	63.27	cp	BRD-K74514084	pazopanib	KIT inhibitor
1673	63.46	cp	BRD-A62890442	3-methyl-GABA	GABA aminotransferase activator
1671	63.51	cp	BRD-A29289453	PCA-4248	Platelet activating factor receptor antagonist
1668	63.55	cp	BRD-A92537424	danazol	Estrogen receptor antagonist
1666	63.61	cp	BRD-A08187463	racecadotril	Enkephalinase inhibitor
1659	63.78	cp	BRD-K92984783	melperone	Serotonin receptor antagonist
1658	63.83	cp	BRD-K50859149	sulfafurazole	Bacterial antifolate
1655	63.92	cp	BRD-A15297126	fluocinonide	Glucocorticoid receptor agonist
1653	63.98	cp	BRD-K05653692	DL-PDMP	Glucosyltransferase inhibitor
1650	63.99	cp	BRD-A22143024	estropipate	Estrogen receptor agonist
1651	63.99	cp	BRD-K63979671	etifenin	Compound used in hepatobiliary scans of the liver
1645	64.12	cp	BRD-K84175871	pseudoephedrine	Adrenergic receptor agonist
1644	64.13	cp	BRD-K80672993	M2-PK-activator	-666
1642	64.19	cp	BRD-K37312348	kenpaullone	CDK inhibitor
1641	64.21	cp	BRD-A77118605	BML-ST330	Phospholipase inhibitor
1638	64.32	cp	BRD-K52075715	oxibendazole	Tubulin inhibitor
1637	64.39	cp	BRD-K81709173	halcinonide	Glucocorticoid receptor agonist
1635	64.45	cp	BRD-K37848908	ceforanide	Penicillin binding protein inhibitor
1634	64.5	cp	BRD-K64610608	EMF-bca1-57	caspase inhibitor
1631	64.55	cp	BRD-K12002134	megestrol	progesterone receptor agonist
1630	64.57	cp	BRD-K29673530	hypericin	Tyrosine kinase inhibitor
1629	64.62	cp	BRD-K57033106	tripelennamine	Histamine receptor antagonist
1611	64.99	cp	BRD-A31204924	mitotane	Antineoplastic
1607	65.09	cp	BRD-K11433652	aspirin	Cyclooxygenase inhibitor
1605	65.1	cp	BRD-K09255212	clioquinol	Chelating agent
1606	65.1	cp	BRD-K89348303	ramipril	ACE inhibitor
1604	65.17	cp	BRD-K09764130	mead-ethanolamide	Cannabinoid receptor agonist
[truncated: 430 more rows]

## Sheet: L1000 only
Rank	Score	Type	ID	Name	Description
8549	-99.93	cp	BRD-K54330070	SB-202190	p38 MAPK inhibitor
8527	-99.75	cp	BRD-K21733600	rofecoxib	Cyclooxygenase inhibitor
8518	-99.65	cp	BRD-K66296774	fluvastatin	HMGCR inhibitor
8512	-99.61	cp	BRD-K93918653	quizartinib	FLT3 inhibitor
8513	-99.61	cp	BRD-K85606544	neratinib	EGFR inhibitor
8506	-99.54	cp	BRD-K94441233	mevastatin	HMGCR inhibitor
8501	-99.51	cp	BRD-K32330832	VER-155008	HSP inhibitor
8494	-99.4	cp	BRD-A85860691	chaetocin	Histone lysine methyltransferase inhibitor
8488	-99.33	cp	BRD-K12994359	valdecoxib	Cyclooxygenase inhibitor
8478	-99.19	cp	BRD-K09416995	lovastatin	HMGCR inhibitor
8471	-99.12	cp	BRD-K06750613	GSK-1059615	PI3K inhibitor
8472	-99.12	cp	BRD-A02481876	importazole	Importin-beta transport receptor inhibitor
8466	-99.05	cp	BRD-K30677119	PP-30	RAF inhibitor
8467	-99.05	cp	BRD-K27305650	LY-294002	MTOR inhibitor
8461	-99.02	cp	BRD-K37206356	rhamnetin	HDAC inhibitor
8460	-99.01	cp	BRD-A70731303	avrainvillamide-analog-5	nucleophosmin inhibitor
8457	-98.98	cp	BRD-K97365803	PI-828	PI3K inhibitor
8453	-98.95	cp	BRD-K47598052	PP-1	SRC inhibitor
8454	-98.95	cp	BRD-K56429665	calcipotriol	Vitamin D receptor agonist
8449	-98.92	cp	BRD-A52282606	lacidipine	Calcium channel blocker
8448	-98.91	cp	BRD-K94294671	OSI-027	MTOR inhibitor
8444	-98.87	cp	BRD-K77286328	reversine	Aurora kinase inhibitor
8445	-98.87	cp	BRD-A62025033	temsirolimus	MTOR inhibitor
8441	-98.86	cp	BRD-K29313308	HDAC3-selective	HDAC inhibitor
8437	-98.84	cp	BRD-K35531059	molsidomine	Guanylyl cyclase activator
8438	-98.84	cp	BRD-K12184916	dactolisib	MTOR inhibitor
8439	-98.84	cp	BRD-K47207162	zimelidine	Serotonin reuptake inhibitor
8431	-98.8	cp	BRD-U25771771	WZ-4-145	EGFR inhibitor
8424	-98.7	cp	BRD-K67566344	KU-0063794	MTOR inhibitor
8414	-98.63	cp	BRD-K67868012	PI-103	MTOR inhibitor
8415	-98.63	cp	BRD-A69960130	bromocriptine	Dopamine receptor agonist
8416	-98.63	cp	BRD-A45498368	WYE-125132	MTOR inhibitor
8410	-98.59	cp	BRD-K30097969	pitavastatin	HMGCR inhibitor
8407	-98.56	cp	BRD-K69650333	idarubicin	Topoisomerase inhibitor
8403	-98.52	cp	BRD-U08759356	EI-346-erlotinib-analog	EGFR inhibitor
8402	-98.49	cp	BRD-K99545815	PF-562271	Focal adhesion kinase inhibitor
8398	-98.48	cp	BRD-K65503129	HSP90-inhibitor	HSP inhibitor
8399	-98.48	cp	BRD-A81772229	simvastatin	HMGCR inhibitor
8392	-98.45	cp	BRD-M16762496	PIK-75	DNA protein kinase inhibitor
8393	-98.45	cp	BRD-K82823804	SA-792987	PKC inhibitor
8394	-98.45	cp	BRD-K06543683	bisindolylmaleimide-ix	CDK inhibitor
8387	-98.41	cp	BRD-K19220233	JNK-9L	JNK inhibitor
8388	-98.41	cp	BRD-A60245366	AS-601245	JNK inhibitor
8389	-98.41	cp	BRD-K43389675	daunorubicin	RNA synthesis inhibitor
8383	-98.38	cp	BRD-K11927976	ER-27319	Mediator release inhibitor
8373	-98.34	cp	BRD-K83794624	pirarubicin	Topoisomerase inhibitor
8374	-98.34	cp	BRD-U51951544	ZG-10	JNK inhibitor
8375	-98.34	cp	BRD-K38615104	A-443644	AKT inhibitor
8376	-98.34	cp	BRD-K11636097	JNJ-7706621	CDK inhibitor
8377	-98.34	cp	BRD-K13390322	AT-7519	CDK inhibitor
8378	-98.34	cp	BRD-A73909368	dactinomycin	RNA polymerase inhibitor
8379	-98.34	cp	BRD-A13122391	triptolide	RNA polymerase inhibitor
8367	-98.31	cp	BRD-A18497530	5-iodotubercidin	Adenosine kinase inhibitor
8368	-98.31	cp	BRD-K79090631	CGP-60474	CDK inhibitor
8369	-98.31	cp	BRD-K87909389	alvocidib	CDK inhibitor
8364	-98.29	cp	BRD-A00758722	noretynodrel	Progestogen hormone
8362	-98.25	cp	BRD-K69932463	AZD-8055	MTOR inhibitor
8360	-98.24	cp	BRD-A11702965	chromomycin-a3	DNA binding agent
8357	-98.2	cp	BRD-K99818283	PIK-90	PI3K inhibitor
8356	-98.17	cp	BRD-K13566078	BMS-345541	IKK inhibitor
8353	-98.13	cp	BRD-A41519720	ezetimibe	Niemann-Pick C1-like 1 protein antagonist
8337	-97.96	cp	BRD-K59456551	methotrexate	Dihydrofolate reductase inhibitor
8338	-97.96	cp	BRD-K00673382	famotidine	Histamine receptor antagonist
8333	-97.92	cp	BRD-K04548931	pidorubicine	Topoisomerase inhibitor
8334	-97.92	cp	BRD-K77008974	WYE-354	MTOR inhibitor
8329	-97.85	cp	BRD-K40175214	torin-1	MTOR inhibitor
8330	-97.85	cp	BRD-K36740062	GSK-1070916	Aurora kinase inhibitor
8323	-97.82	cp	BRD-A59985574	topotecan	Topoisomerase inhibitor
8320	-97.8	cp	BRD-K16478699	PLX-4720	RAF inhibitor
8314	-97.74	cp	BRD-U82589721	HG-5-113-01	Protein kinase inhibitor
8315	-97.74	cp	BRD-K92093830	doxorubicin	Topoisomerase inhibitor
8312	-97.67	cp	BRD-K52911425	GDC-0941	PI3K inhibitor
8306	-97.6	cp	BRD-K51967704	BIIB021	HSP inhibitor
8307	-97.6	cp	BRD-K31542390	mycophenolic-acid	Dehydrogenase inhibitor
8308	-97.6	cp	BRD-K04887706	AKT-inhibitor-1-2	AKT inhibitor
8303	-97.56	cp	BRD-K42500029	CGP-57380	MAP kinase inhibitor
8301	-97.53	cp	BRD-A72711497	lasalocid	Bacterial permeability inducer
8297	-97.49	cp	BRD-K52850071	JAK3-Inhibitor-II	JAK inhibitor
8294	-97.47	cp	BRD-K49049886	CGS-15943	Adenosine receptor antagonist
8292	-97.46	cp	BRD-K51018020	VAMA-37	DNA dependent protein kinase inhibitor
8290	-97.43	cp	BRD-K83972459	JWE-035	Aurora kinase inhibitor
8288	-97.39	cp	BRD-K89708791	rifaximin	RNA synthesis inhibitor
8286	-97.37	cp	BRD-K18787491	U-0126	MEK inhibitor
8285	-97.36	cp	BRD-K59962020	CHEMBL-374350	NFkB pathway inhibitor
8276	-97.29	cp	BRD-K64800655	PHA-793887	CDK inhibitor
8277	-97.29	cp	BRD-K13049116	BMS-754807	IGF-1 inhibitor
8271	-97.25	cp	BRD-K34581968	BMS-536924	IGF-1 inhibitor
8267	-97.22	cp	BRD-A30437061	camptothecin	Topoisomerase inhibitor
8261	-97.15	cp	BRD-K13646352	midostaurin	FLT3 inhibitor
8263	-97.15	cp	BRD-K63068307	ZSTK-474	PI3K inhibitor
8257	-97.11	cp	BRD-K10467831	tibolone	Androgen receptor agonist
8249	-97.04	cp	BRD-K05804044	AZ-628	RAF inhibitor
8250	-97.04	cp	BRD-K94144010	cotinine	Nicotine metabolite
8253	-97.04	cp	BRD-A02333338	cyclopamine	Smoothened receptor antagonist
8247	-97.01	cp	BRD-K04466929	Merck60	HDAC inhibitor
8241	-96.95	cp	BRD-A11678676	wortmannin	PI3K inhibitor
8240	-96.93	cp	BRD-K08547377	irinotecan	Topoisomerase inhibitor
8239	-96.9	cp	BRD-U88459701	atorvastatin	HMGCR inhibitor
8234	-96.82	cp	BRD-A41692738	TGX-221	PI3K inhibitor
8233	-96.81	cp	BRD-A39230911	chlorphensin	Muscle relaxant
8227	-96.79	cp	BRD-K78431006	crizotinib	ALK inhibitor
8228	-96.79	cp	BRD-K21680192	mitoxantrone	Topoisomerase inhibitor
8226	-96.75	cp	BRD-K95785537	PP-2	SRC inhibitor
8224	-96.74	cp	BRD-K58772419	AZD-6482	PI3K inhibitor
8218	-96.69	cp	BRD-K00337317	NU-7441	DNA dependent protein kinase inhibitor
8214	-96.66	cp	BRD-K32292990	CGP-53353	EGFR inhibitor
8207	-96.63	cp	BRD-K83063356	RS-102895	CCR antagonist
8210	-96.63	cp	BRD-K02130563	panobinostat	HDAC inhibitor
8206	-96.62	cp	BRD-K09499853	KU-0060648	DNA dependent protein kinase inhibitor
8203	-96.58	cp	BRD-K92138166	mammea-a	other antibiotic
8201	-96.55	cp	BRD-A64297288	amlodipine	Calcium channel blocker
8202	-96.55	cp	BRD-A55594068	vinblastine	Microtubule inhibitor
8192	-96.44	cp	BRD-A82238138	budesonide	Glucocorticoid receptor agonist
8191	-96.41	cp	BRD-K35430135	SR-59230A	Adrenergic receptor antagonist
8190	-96.37	cp	BRD-K01436366	XMD-1150	Leucine rich repeat kinase inhibitor
8188	-96.34	cp	BRD-K13514097	everolimus	MTOR inhibitor
8186	-96.3	cp	BRD-K83289131	CAY-10618	NAMPT inhibitor
8180	-96.26	cp	BRD-K28296557	AKT-inhibitor-IV	AKT inhibitor
8181	-96.26	cp	BRD-K67439147	SIB-1893	Glutamate receptor antagonist
8182	-96.26	cp	BRD-K25311561	KU-55933	ATM kinase inhibitor
8178	-96.23	cp	BRD-A89337244	PD-102807	Acetylcholine receptor antagonist
8176	-96.21	cp	BRD-K09537769	NU-7026	DNA dependent protein kinase inhibitor
8174	-96.19	cp	BRD-K59570838	homoveratrylamine	Dopamine analog
8171	-96.14	cp	BRD-K56001384	antimycin-a	ATP synthase inhibitor
8169	-96.12	cp	BRD-K19894101	MST-312	Telomerase inhibitor
8168	-96.09	cp	BRD-K61829047	7b-cis	Exportin antagonist
8165	-96.03	cp	BRD-K37798499	etoposide	Topoisomerase inhibitor
8163	-96.02	cp	BRD-K32501161	vanoxerine	Dopamine uptake inhibitor
8162	-95.99	cp	BRD-A48237631	mitomycin-c	DNA alkylating agent
8160	-95.98	cp	BRD-A36630025	SN-38	Topoisomerase inhibitor
8161	-95.98	cp	BRD-A63546914	RO-04-5595	Glutamate receptor antagonist
8154	-95.95	cp	BRD-K89626439	sirolimus	MTOR inhibitor
8155	-95.95	cp	BRD-K68336408	tyrphostin-AG-1478	EGFR inhibitor
8157	-95.95	cp	BRD-K68132782	terbinafine	Fungal squalene epoxidase inhibitor
8145	-95.88	cp	BRD-K95901403	XL-147	PI3K inhibitor
8143	-95.87	cp	BRD-K72726508	arcyriaflavin-a	CDK inhibitor
8141	-95.86	cp	BRD-K42748308	XE-991	Potassium channel blocker
8140	-95.85	cp	BRD-K77987382	mebendazole	Tubulin inhibitor
8136	-95.84	cp	BRD-K61097567	SB-218795	Tachykinin antagonist
8127	-95.73	cp	BRD-K64857848	XMD-885	Leucine rich repeat kinase inhibitor
8128	-95.73	cp	BRD-K70358946	aripiprazole	Serotonin receptor agonist
8129	-95.73	cp	BRD-K88677950	PD-198306	MAP kinase inhibitor
8125	-95.66	cp	BRD-K53220666	trimetozine	Sedative
8117	-95.52	cp	BRD-K25504083	cytochalasin-d	Actin polymerization inhibitor
8112	-95.49	cp	BRD-K54233340	dorsomorphin	AMPK inhibitor
8110	-95.45	cp	BRD-A70407468	PSB-36	Adenosine receptor antagonist
8107	-95.44	cp	BRD-K12079898	PD-160170	Neuropeptide receptor antagonist
8102	-95.4	cp	BRD-K60219430	serdemetan	MDM inhibitor
8103	-95.4	cp	BRD-K66874953	pifithrin-alpha	TP53 inhibitor
8100	-95.39	cp	BRD-K94832621	Y-134	Estrogen receptor antagonist
8097	-95.31	cp	BRD-K82941592	rosuvastatin	HMGCR inhibitor
8093	-95.27	cp	BRD-K49810818	sorafenib	FLT3 inhibitor
8094	-95.27	cp	BRD-K15592317	CP466722	ATM kinase inhibitor
8092	-95.25	cp	BRD-K16485616	mocetinostat	HDAC inhibitor
8091	-95.24	cp	BRD-K96471533	nitazoxanide	Pyruvate ferredoxin oxidoreductase inhibitor
8082	-95.14	cp	BRD-K51575138	TPCA-1	IKK inhibitor
8079	-95.13	cp	BRD-K36198571	WAY-170523	Metalloproteinase inhibitor
8078	-95.11	cp	BRD-A79465854	auranofin	NFkB pathway inhibitor
8075	-95.1	cp	BRD-K98548675	parthenolide	NFkB pathway inhibitor
8076	-95.1	cp	BRD-K19295594	gossypol	BCL inhibitor
8074	-95.09	cp	BRD-K15616905	CCCP	Mitochondrial oxidative phosphorylation uncoupler
8073	-95.07	cp	BRD-K91263825	nortriptyline	Tricyclic antidepressant
8071	-95.02	cp	BRD-A34817987	itraconazole	Cytochrome P450 inhibitor
8067	-94.98	cp	BRD-K83023055	GR-135531	Melatonin receptor agonist
8065	-94.97	cp	BRD-K42573370	avrainvillamide-analog-2	nucleophosmin inhibitor
8063	-94.93	cp	BRD-K14200658	syrosingopine	Vesicular monoamine transporter inhibitor
8062	-94.89	cp	BRD-K19540840	saracatinib	SRC inhibitor
8054	-94.83	cp	BRD-K16336526	capsaicin	TRPV agonist
8053	-94.82	cp	BRD-K31471398	dihydrexidine	Dopamine receptor agonist
8051	-94.81	cp	BRD-K20285085	fostamatinib	SYK inhibitor
8050	-94.8	cp	BRD-K12502280	TG-101348	FLT3 inhibitor
8049	-94.78	cp	BRD-K59369769	tozasertib	Aurora kinase inhibitor
8046	-94.75	cp	BRD-K33864865	LY-225910	CCK receptor antagonist
8045	-94.74	cp	BRD-K39120595	bithionol	Autotaxin inhibitor
8041	-94.7	cp	BRD-K67578145	GDC-0879	RAF inhibitor
8038	-94.65	cp	BRD-K64890080	BI-2536	PLK inhibitor
8036	-94.64	cp	BRD-K76872913	benzanthrone	Aromatic hydrocarbon derivative
8035	-94.63	cp	BRD-K78278890	NM-PP1	Mutant kinase inhibitor
8032	-94.55	cp	BRD-K18779551	bifemelane	Acetylcholine release stimulant
8030	-94.52	cp	BRD-K87024524	phenelzine	Monoamine oxidase inhibitor
8026	-94.5	cp	BRD-U33728988	QL-X-138	MTOR inhibitor
8027	-94.5	cp	BRD-K84955386	hyperoside	Glucosidase inhibitor
8029	-94.5	cp	BRD-M64432851	sunitinib	FLT3 inhibitor
8023	-94.45	cp	BRD-K68488863	ENMD-2076	FLT3 inhibitor
8021	-94.43	cp	BRD-K68065987	MK-2206	AKT inhibitor
8017	-94.4	cp	BRD-K37991163	paroxetine	Selective serotonin reuptake inhibitor (SSRI)
8003	-94.22	cp	BRD-K69840642	ISOX	HDAC inhibitor
8004	-94.22	cp	BRD-K40965114	cyanopindolol	Adrenergic receptor antagonist
8002	-94.2	cp	BRD-K88679075	methandriol	Androgenic steroid
8001	-94.19	cp	BRD-K52522949	NCH-51	HDAC inhibitor
7997	-94.12	cp	BRD-A58564983	selamectin	Nematocide
7995	-94.11	cp	BRD-K07762753	aminopurvalanol-a	Tyrosine kinase inhibitor
7991	-94.06	cp	BRD-K15715913	fluperlapine	Serotonin receptor antagonist
7989	-94.04	cp	BRD-K88625236	nonoxynol-9	Membrane integrity inhibitor
7984	-93.92	cp	BRD-K23192422	lestaurtinib	FLT3 inhibitor
7983	-93.9	cp	BRD-K59058766	chlorprothixene	Dopamine receptor antagonist
7982	-93.87	cp	BRD-A84481105	thioridazine	Dopamine receptor antagonist
7977	-93.8	cp	BRD-K70490179	rimcazole	Sigma receptor antagonist
7976	-93.78	cp	BRD-A45499626	UBP-302	Glutamate receptor antagonist
7972	-93.7	cp	BRD-K49669041	BX-912	Pyruvate dehydrogenase kinase inhibitor
7969	-93.66	cp	BRD-A50737080	CGK-733	ATR kinase inhibitor
7971	-93.66	cp	BRD-K26664453	cytochalasin-b	Microtubule inhibitor
7968	-93.65	cp	BRD-K50140147	NVP-TAE684	ALK inhibitor
7966	-93.64	cp	BRD-K32744045	disulfiram	Aldehyde dehydrogenase inhibitor
7959	-93.53	cp	BRD-K52989797	clomipramine	Serotonin transporter inhibitor (SERT)
7957	-93.48	cp	BRD-A68888262	azelastine	Histamine receptor antagonist
7956	-93.47	cp	BRD-K64052750	gefitinib	EGFR inhibitor
7953	-93.46	cp	BRD-K94649603	taxifolin	Opioid receptor antagonist
7949	-93.41	cp	BRD-K78126613	menadione	Mitochondrial DNA polymerase inhibitor
7950	-93.41	cp	BRD-K69328504	L-690488	Inositol monophosphatase inhibitor
7946	-93.35	cp	BRD-K92428153	mycophenolate-mofetil	Dehydrogenase inhibitor
7943	-93.34	cp	BRD-K11630072	carmofur	Thymidylate synthase inhibitor
7944	-93.34	cp	BRD-U37049823	HG-6-64-01	RAF inhibitor
7940	-93.3	cp	BRD-K08554278	bisbenzimide	DNA binding agent
7938	-93.27	cp	BRD-K76840893	RS-17053	Adrenergic receptor antagonist
7937	-93.23	cp	BRD-K66175015	afatinib	EGFR inhibitor
7935	-93.21	cp	BRD-K61480498	epoxycholesterol	LXR agonist
7933	-93.2	cp	BRD-A28105619	cucurbitacin-i	JAK inhibitor
7924	-93.09	cp	BRD-K93480852	KN-93	Calcium-calmodulin dependent protein kinase inhibitor
7925	-93.09	cp	BRD-K21672174	RO-28-1675	Glucokinase activator
7922	-93.07	cp	BRD-K16508793	diazepam	Benzodiazepine receptor agonist
7920	-93.05	cp	BRD-K08219523	5-nonyloxytryptamine	Serotonin receptor agonist
7919	-93	cp	BRD-K41731458	triclosan	Enoyl-[acyl-carrier-protein] reductase [NADH] inhibitor
7916	-92.98	cp	BRD-K22503835	scriptaid	HDAC inhibitor
7913	-92.97	cp	BRD-A19633847	perhexiline	Carnitine palmitoyltransferase inhibitor
7911	-92.92	cp	BRD-A19500257	geldanamycin	HSP inhibitor
7910	-92.9	cp	BRD-A91452556	estradiol-cypionate	Estrogen receptor agonist
7907	-92.89	cp	BRD-K12906962	dichlorobenzamil	Sodium/calcium exchange inhibitor
7906	-92.88	cp	BRD-A22713669	BVT-948	Tyrosine phosphatase inhibitor
7905	-92.84	cp	BRD-K70401845	erlotinib	EGFR inhibitor
7901	-92.8	cp	BRD-K17953061	staurosporine	PKC inhibitor
7895	-92.67	cp	BRD-K59469039	AG-879	Angiogenesis inhibitor
7892	-92.65	cp	BRD-K54316499	tolterodine	Acetylcholine receptor antagonist
7890	-92.64	cp	BRD-K38477985	malonoben	Protein tyrosine kinase inhibitor
7888	-92.57	cp	BRD-K17140735	SCH-79797	Proteasome inhibitor
7885	-92.54	cp	BRD-K74514084	pazopanib	KIT inhibitor
7886	-92.54	cp	BRD-K37289225	clozapine	Dopamine receptor antagonist
7884	-92.53	cp	BRD-K05653692	DL-PDMP	Glucosyltransferase inhibitor
7878	-92.47	cp	BRD-K26997899	SA-792574	Microtubule inhibitor
7876	-92.46	cp	BRD-A02367930	ethinyl-estradiol	DNA directed DNA polymerase stimulant
7874	-92.38	cp	BRD-K65285700	BRD-K65285700	Cannabinoid receptor agonist
7873	-92.37	cp	BRD-A07765530	epinephrine	carbonic anhydrase activator
7864	-92.31	cp	BRD-A54927599	KF-38789	P-selectin inhibitor
7862	-92.3	cp	BRD-K05434375	HA-1004	Calcium channel blocker
7860	-92.28	cp	BRD-K24132293	piperlongumine	Glutathione transferase inhibitor
7853	-92.13	cp	BRD-K63675182	triflupromazine	Dopamine receptor antagonist
7852	-92.11	cp	BRD-K37865504	LY-2183240	FAAH inhibitor
7849	-92.07	cp	BRD-K68174511	torin-2	MTOR inhibitor
7850	-92.07	cp	BRD-A96107863	nisoldipine	Calcium channel blocker
7848	-92.04	cp	BRD-A35588707	teniposide	Topoisomerase inhibitor
7843	-92	cp	BRD-K09638361	SA-63133	-666
7842	-91.97	cp	BRD-K62858456	lomerizine	Calcium channel blocker
7838	-91.92	cp	BRD-K68407802	KIN001-055	EGFR inhibitor
7836	-91.89	cp	BRD-K25310650	ormetoprim	Bacterial antifolate
7835	-91.87	cp	BRD-K22878149	SB-205607	Delta 1 opioid receptor agonist
7833	-91.85	cp	BRD-K04210847	tamoxifen	Estrogen receptor antagonist
7831	-91.78	cp	BRD-K29113274	ketoconazole	Sterol demethylase inhibitor
7830	-91.72	cp	BRD-K12867552	THM-I-94	HDAC inhibitor
7822	-91.57	cp	BRD-A06784547	MRS-1334	Adenosine receptor antagonist
7820	-91.49	cp	BRD-A15079084	phorbol-12-myristate-13-acetate	PKC activator
7806	-91.33	cp	BRD-K67537649	PQ-401	IGF-1 inhibitor
7805	-91.32	cp	BRD-A04756508	norgestimate	Progesterone receptor agonist
7803	-91.3	cp	BRD-K81418486	vorinostat	HDAC inhibitor
7801	-91.27	cp	BRD-K81855038	roxatidine	Histamine receptor antagonist
7796	-91.18	cp	BRD-K17743125	belinostat	HDAC inhibitor
7795	-91.17	cp	BRD-K63343048	orlistat	Lipase inhibitor
7790	-91.12	cp	BRD-K97399794	quercetin	Polar auxin transport inhibitor
7791	-91.12	cp	BRD-A71459254	cymarin	ATPase inhibitor
7792	-91.12	cp	BRD-K91370081	anisomycin	DNA synthesis inhibitor
7787	-91.11	cp	BRD-K89014967	AS-703026	MEK inhibitor
7788	-91.11	cp	BRD-K72420232	WZ-4002	EGFR inhibitor
7784	-91.09	cp	BRD-K85015012	NNC-05-2090	GAT inhibitor
7785	-91.09	cp	BRD-K59522102	piperine	Monoamine oxidase inhibitor
7781	-91.04	cp	BRD-K46056750	AZD-7762	CHK inhibitor
7779	-91.01	cp	BRD-K30990140	FR-122047	Cyclooxygenase inhibitor
7777	-90.98	cp	BRD-K63606607	bufalin	ATPase inhibitor
7775	-90.95	cp	BRD-K66707493	lawsone	Coloring agent
7773	-90.91	cp	BRD-A48570745	ivermectin	GABA receptor agonist
7770	-90.86	cp	BRD-K30563334	rifabutin	Protein synthesis inhibitor
7768	-90.82	cp	BRD-K99291625	SB-203580	p38 MAPK inhibitor
7765	-90.81	cp	BRD-K94919853	10H-phenothiazin-10-yl)(p-tolyl)methanone	Butyrylcholinesterase inhibitor
7763	-90.79	cp	BRD-K24859147	KIN001-242	Protein kinase inhibitor
7757	-90.75	cp	BRD-A83326220	brazilin	Nitric oxide production inhibitor
7755	-90.74	cp	BRD-K17075857	chloroxine	Opioid receptor antagonist
7754	-90.73	cp	BRD-K11742128	triprolidine	Histamine receptor antagonist
7751	-90.72	cp	BRD-M86331534	pyrvinium-pamoate	AKT inhibitor
7749	-90.7	cp	BRD-K35960502	niclosamide	DNA replication inhibitor
7750	-90.7	cp	BRD-A45543382	metrizamide	Radiopaque medium
7748	-90.68	cp	BRD-K17497770	butein	EGFR inhibitor
7743	-90.64	cp	BRD-K01253243	SB-590885	RAF inhibitor
7740	-90.62	cp	BRD-K53414658	tivozanib	VEGFR inhibitor
7736	-90.61	cp	BRD-A47829399	artesunate	DNA synthesis inhibitor
7728	-90.54	cp	BRD-A82096673	KU-C103428N	CDC inhibitor
7725	-90.52	cp	BRD-K07237224	moclobemide	Monoamine oxidase inhibitor
7721	-90.45	cp	BRD-A19248578	latrunculin-b	Actin polymerization inhibitor
7718	-90.42	cp	BRD-K99964838	bosutinib	ABL inhibitor
7714	-90.32	cp	BRD-A52650764	ingenol	PKC activator
7712	-90.3	cp	BRD-A27489425	rolitetracycline	Bacterial 30S ribosomal subunit inhibitor
7709	-90.25	cp	BRD-K22385716	LY-303511	Casein kinase inhibitor
7704	-90.19	cp	BRD-A49046702	SKF-89976A	GABA uptake inhibitor
7703	-90.17	cp	BRD-K73290745	ICI-199441	Opioid receptor agonist
7700	-90.1	cp	BRD-K06426971	ryuvidine	Histone lysine methyltransferase inhibitor
7698	-90.05	cp	BRD-K34820100	tebuthiuron	Photosynthesis inhibitor
7697	-90.01	cp	BRD-K94887716	TFMPP	Serotonin receptor agonist
7691	-89.92	cp	BRD-K78122587	NNC-55-0396	T-type calcium channel blocker
7692	-89.92	cp	BRD-A93236127	digitoxin	ATPase inhibitor
7690	-89.89	cp	BRD-K09186807	KIN001-244	Phosphoinositide dependent kinase inhibitor
7687	-89.83	cp	BRD-A39172021	ampiroxicam	Cyclooxygenase inhibitor
7688	-89.83	cp	BRD-A12016240	LY-278584	Serotonin receptor antagonist
7685	-89.81	cp	BRD-K03816923	rottlerin	MAP kinase inhibitor
7682	-89.8	cp	BRD-A29289453	PCA-4248	Platelet activating factor receptor antagonist
7680	-89.79	cp	BRD-U73238814	QL-XI-92	DDR1 inhibitor
7681	-89.79	cp	BRD-K91904471	SD-169	p38 MAPK inhibitor
7679	-89.78	cp	BRD-A18763547	BAX-channel-blocker	Cytochrome C release inhibitor
7678	-89.75	cp	BRD-K45117373	Y-26763	Potassium channel activator
7675	-89.73	cp	BRD-A29901043	KIN001-127	ITK inhibitor
7674	-89.7	cp	BRD-K37814297	acepromazine	Dopamine receptor antagonist
7672	-89.62	cp	BRD-A01320529	salmeterol	Adrenergic receptor agonist
7669	-89.6	cp	BRD-K93325701	damnacanthal	SRC inhibitor
7670	-89.6	cp	BRD-K14821540	FCCP	Mitochondrial oxidative phosphorylation uncoupler
7663	-89.56	cp	BRD-A34806832	proscillaridin	ATPase inhibitor
7662	-89.54	cp	BRD-K15567136	papaverine	Phosphodiesterase inhibitor
7658	-89.48	cp	BRD-K49328571	dasatinib	BCR-ABL kinase inhibitor
7651	-89.36	cp	BRD-K14618467	IKK-16	IKK inhibitor
7652	-89.36	cp	BRD-K62792802	LY-83583	Guanylyl cyclase inhibitor
7649	-89.33	cp	BRD-K74305673	IKK-2-inhibitor-V	IKK inhibitor
7644	-89.16	cp	BRD-K50168500	canertinib	EGFR inhibitor
7641	-89.09	cp	BRD-U68942961	JW-7-24-1	LCK Inhibitor
7640	-89.04	cp	BRD-K77908580	entinostat	HDAC inhibitor
7635	-88.97	cp	BRD-K82036761	sertraline	Serotonin receptor antagonist
7632	-88.94	cp	BRD-K68392338	ZK-93426	Benzodiazepine receptor antagonist
7629	-88.9	cp	BRD-K49294207	BIBU-1361	EGFR inhibitor
7630	-88.9	cp	BRD-A31159102	fluoxetine	Selective serotonin reuptake inhibitor (SSRI)
7627	-88.86	cp	BRD-K95435023	PHA-665752	c-Met inhibitor
7622	-88.79	cp	BRD-K46556543	canrenoic-acid	Mineralocorticoid receptor antagonist
7621	-88.78	cp	BRD-A38749782	fludrocortisone	Glucocorticoid receptor agonist
7620	-88.77	cp	BRD-A08003242	rhodomyrtoxin-b	sodium fluorescein uptake inhibitor
7617	-88.73	cp	BRD-A68589262	troxipide	Glucosamine synthetase stimulant
7618	-88.73	cp	BRD-K51671335	sulpiride	Dopamine receptor antagonist
7616	-88.71	cp	BRD-A44780397	mifepristone	Glucocorticoid receptor antagonist
7614	-88.7	cp	BRD-K11911061	GR-127935	Serotonin receptor antagonist
7606	-88.55	cp	BRD-A98283014	calmidazolium	Calcium channel blocker
7607	-88.55	cp	BRD-K40992116	parachlorophenol	Anti-infective
7603	-88.53	cp	BRD-K41859756	NVP-AUY922	HSP inhibitor
7601	-88.51	cp	BRD-K94176593	TWS-119	Glycogen synthase kinase inhibitor
7600	-88.5	cp	BRD-A55946879	BW-B70C	Lipoxygenase inhibitor
7592	-88.39	cp	BRD-K08417745	SID-26681509	Cathepsin inhibitor
7593	-88.39	cp	BRD-K80325895	eicosadienoic-acid	-666
7590	-88.36	cp	BRD-K45033733	famciclovir	DNA polymerase inhibitor
7588	-88.32	cp	BRD-K99498722	NPI-2358	Tubulin inhibitor
7586	-88.3	cp	BRD-A88254928	salbutamol	Adrenergic receptor agonist
7584	-88.25	cp	BRD-K73293050	WZ-3146	EGFR inhibitor
7582	-88.22	cp	BRD-K23383398	T-0901317	LXR agonist
7578	-88.16	cp	BRD-K15025317	BAY-11-7821	NFkB pathway inhibitor
7575	-88.14	cp	BRD-K14282469	LY-165163	Serotonin receptor antagonist
7576	-88.14	cp	BRD-K17896185	FIT	Opioid receptor agonist
7574	-88.11	cp	BRD-K47983010	BX-795	IKK inhibitor
7568	-88.04	cp	BRD-A17065207	brefeldin-a	Protein synthesis inhibitor
7565	-87.98	cp	BRD-K64517075	heliomycin	ATP synthase inhibitor
7561	-87.97	cp	BRD-K86003836	flubendazole	Tubulin inhibitor
7556	-87.93	cp	BRD-K49481516	galantamine	Acetylcholinesterase inhibitor
7554	-87.9	cp	BRD-K66792149	quinoclamine	Algicide
7552	-87.83	cp	BRD-K44442813	pidotimod	Interferon receptor agonist
7553	-87.83	cp	BRD-K05737787	isoeugenol	Nitric oxide production inhibitor
7551	-87.78	cp	BRD-K70327191	benzoxiquine	Anti-infective
7545	-87.77	cp	BRD-K54665485	R-59022	Diacylglycerol kinase inhibitor
7549	-87.77	cp	BRD-K92428232	GSK-461364	PLK inhibitor
7532	-87.56	cp	BRD-K51223576	AG-99	Tyrosine kinase inhibitor
7530	-87.54	cp	BRD-K46742498	alosetron	Serotonin receptor antagonist
7528	-87.53	cp	BRD-K10705233	GW-405833	Cannabinoid receptor agonist
7526	-87.52	cp	BRD-K76674262	homoharringtonine	Protein synthesis inhibitor
7523	-87.51	cp	BRD-K40624912	ZM-39923	JAK inhibitor
7520	-87.46	cp	BRD-A34205397	suloctidil	Adrenergic receptor antagonist
7512	-87.3	cp	BRD-K03384561	roquinimex	Angiogenesis inhibitor
7513	-87.3	cp	BRD-K02407574	parbendazole	Tubulin inhibitor
7510	-87.28	cp	BRD-K68997413	PF-3845	FAAH inhibitor
7511	-87.28	cp	BRD-K15563106	phloretin	Sodium/glucose cotransporter inhibitor
7508	-87.23	cp	BRD-K98490050	amsacrine	Topoisomerase inhibitor
7503	-87.19	cp	BRD-K06792661	narciclasine	Coflilin signaling pathway activator
7504	-87.19	cp	BRD-K63165456	norcyclobenzaprine	Adrenergic receptor agonist
7498	-87.03	cp	BRD-K66019333	oxantel	Anthelmintic
7497	-87.01	cp	BRD-K81847782	scandenin	Plant compound with antimicrobial activity
7492	-86.94	cp	BRD-A95096829	PNU-96415E	Dopamine receptor antagonist
7488	-86.85	cp	BRD-K18518344	digitoxigenin	ATPase inhibitor
7483	-86.79	cp	BRD-K16406336	methylene-blue	Guanylyl cyclase inhibitor
7478	-86.74	cp	BRD-K09132007	D-4476	TGF beta receptor inhibitor
7477	-86.72	cp	BRD-A43331270	niguldipine	Calcium channel blocker
7475	-86.7	cp	BRD-A37347161	BRL-52537	Opioid receptor agonist
7474	-86.69	cp	BRD-K32906660	bis-tyrphostin	EGFR inhibitor
7469	-86.64	cp	BRD-K15600710	obatoclax	BCL inhibitor
7470	-86.64	cp	BRD-K32318651	acyclovir	DNA polymerase inhibitor
7465	-86.6	cp	BRD-A33447119	oxfendazole	Anthelmintic
7462	-86.51	cp	BRD-K33551950	radicicol	HSP inhibitor
7457	-86.44	cp	BRD-A24381660	zeranol	Estrogen receptor agonist
7455	-86.42	cp	BRD-K62289640	lylamine	Cannabinoid receptor agonist
7454	-86.39	cp	BRD-A75455249	kavain	Calcium channel modulator
7451	-86.3	cp	BRD-A28970875	puromycin	Protein synthesis inhibitor
7446	-86.22	cp	BRD-K89930444	AG-592	Tyrosine kinase inhibitor
7441	-86.14	cp	BRD-K19554809	MK-212	Serotonin receptor agonist
7442	-86.14	cp	BRD-K74133369	oligomycin-a	ATP synthase inhibitor
7436	-86.02	cp	BRD-K17561142	amiodarone	Potassium channel blocker
7431	-85.97	cp	BRD-K31912990	CGP-71683	Neuropeptide receptor antagonist
7425	-85.88	cp	BRD-K86930074	cediranib	KIT inhibitor
7427	-85.88	cp	BRD-A42571354	cetirizine	Histamine receptor antagonist
7422	-85.83	cp	BRD-K68191783	ALW-II-38-3	Ephrin inhibitor
7410	-85.63	cp	BRD-K43068349	AMG-9810	TRPV antagonist
7409	-85.62	cp	BRD-K44432556	VU-0418946-1	HIF modulator
7408	-85.59	cp	BRD-K62965247	tipifarnib-P2	farnesyltransferase inhibitor
7405	-85.53	cp	BRD-A71765365	mepireserpate	Catecholamine depleting sympatholytic
7403	-85.52	cp	BRD-K32398298	alprazolam	Benzodiazepine receptor agonist
7402	-85.5	cp	BRD-A72483914	spiroxatrine	Serotonin receptor antagonist
7398	-85.48	cp	BRD-K11663430	pyroxamide	HDAC inhibitor
7399	-85.48	cp	BRD-A78360835	cercosporin	Photoactivated toxin
7396	-85.45	cp	BRD-A82590476	SDZ-NKT-343	Tachykinin antagonist
7392	-85.4	cp	BRD-K97810537	beclometasone	Glucocorticoid receptor agonist
7388	-85.37	cp	BRD-K70487031	flupentixol	Dopamine receptor antagonist
7387	-85.31	cp	BRD-K61323504	SB-225002	CC chemokine receptor antagonist
7386	-85.3	cp	BRD-A18917088	estradiol	Contraceptive agent
7384	-85.26	cp	BRD-K17705806	JTC-801	Opioid receptor antagonist
7381	-85.21	cp	BRD-K36529613	PU-H71	HSP inhibitor
7380	-85.2	cp	BRD-K47869605	podophyllotoxin	Microtubule inhibitor
7376	-85.16	cp	BRD-K67298865	SB-431542	TGF beta receptor inhibitor
7367	-85.05	cp	BRD-K09549677	mibefradil	T-type calcium channel blocker
7366	-85.03	cp	BRD-K77677632	SB-200646	Serotonin receptor antagonist
7365	-85.02	cp	BRD-A49370193	RO-60-0175	Serotonin receptor agonist
7360	-84.89	cp	BRD-K41410256	balsalazide	Cyclooxygenase inhibitor
7358	-84.85	cp	BRD-A80775386	hyperforin	Cyclooxygenase inhibitor
7352	-84.74	cp	BRD-K72895815	SSR-69071	Leukocyte elastase inhibitor
7346	-84.65	cp	BRD-A50675702	fipronil	GABA gated chloride channel blocker
7343	-84.63	cp	BRD-K73999723	telmisartan	Angiotensin receptor antagonist
7344	-84.63	cp	BRD-K40255344	tyrphostin-A9	Protein tyrosine kinase inhibitor
7340	-84.58	cp	BRD-K76698671	HNHA	HDAC inhibitor
7339	-84.55	cp	BRD-K50836978	purvalanol-a	CDK inhibitor
7336	-84.51	cp	BRD-A22707317	SB-205384	GABA receptor modulator
7334	-84.49	cp	BRD-A49906757	scopolamine	Acetylcholine receptor antagonist
7335	-84.49	cp	BRD-K14920963	erythrosine	Coloring agent
7329	-84.42	cp	BRD-K96809896	SKF-86002	p38 MAPK inhibitor
7328	-84.41	cp	BRD-K83144676	olmesartan	Angiotensin antagonist
7326	-84.4	cp	BRD-K64044582	linoleamide	ACAT inhibitor
7324	-84.36	cp	BRD-K72703948	ZM-447439	Aurora kinase inhibitor
7318	-84.28	cp	BRD-A41722204	sulmazole	Adenosine receptor antagonist
7310	-84.17	cp	BRD-K01649396	indatraline	Norepinephrine transporter inhibitor
7307	-84.14	cp	BRD-K05151076	ZK-164015	Estrogen receptor antagonist
7306	-84.09	cp	BRD-K10042277	desmethylclozapine	Acetylcholine receptor agonist
7305	-84.08	cp	BRD-K15916496	clotrimazole	Cytochrome P450 inhibitor
7304	-84.06	cp	BRD-K97752965	nicorandil	Nitric oxide donor
7301	-84.05	cp	BRD-A68930007	ouabain	ATPase inhibitor
7299	-84.02	cp	BRD-A61470182	n-formylmethionylalanine	macrophage activator
7298	-84	cp	BRD-K89732114	trifluoperazine	Dopamine receptor antagonist
7296	-83.98	cp	BRD-K39391626	ethylestrenol	Progesterone receptor agonist
7297	-83.98	cp	BRD-K73395020	SA-1478088	-666
7289	-83.9	cp	BRD-A68723818	brompheniramine	Histamine receptor antagonist
7287	-83.88	cp	BRD-A45333398	periplocymarin	Apoptosis stimulant
7285	-83.84	cp	BRD-A33833419	TER-14687	Inhibitor of translocation of PKCq in T cells
7284	-83.79	cp	BRD-K21806131	tegaserod	Serotonin receptor partial agonist
7277	-83.6	cp	BRD-K06593056	LE-135	Retinoid receptor agonist
7272	-83.54	cp	BRD-K31792052	pifithrin	Interleukin receptor antagonist
7262	-83.38	cp	BRD-K39983086	loteprednol	Glucocorticoid receptor agonist
7255	-83.31	cp	BRD-K40578143	GR-79236	Adenosine receptor agonist
7256	-83.31	cp	BRD-A52660433	tetrindole	Monoamine oxidase inhibitor
7260	-83.31	cp	BRD-K57080016	selumetinib	MEK inhibitor
7251	-83.25	cp	BRD-K89997465	chlorpromazine	Dopamine receptor antagonist
7244	-83.14	cp	BRD-K73991644	isoquercetin	Aldose reductase inhibitor
7241	-83.08	cp	BRD-K24681473	YM-155	Survivin inhibitor
7239	-83.04	cp	BRD-K73397362	purmorphamine	Smoothened receptor agonist
7232	-82.98	cp	BRD-K81528515	nilotinib	ABL inhibitor
7233	-82.98	cp	BRD-K90543092	levonorgestrel	Estrogen receptor agonist
7226	-82.92	cp	BRD-A55484088	BNTX	Opioid receptor antagonist
7223	-82.91	cp	BRD-K10961822	latanoprost	Prostanoid receptor agonist
7224	-82.91	cp	BRD-K71512533	SNS-314	Aurora kinase inhibitor
7221	-82.9	cp	BRD-A43671941	oxprenolol	Adrenergic receptor antagonist
7217	-82.84	cp	BRD-K81209159	herniarin	Acetylcholinesterase inhibitor
7218	-82.84	cp	BRD-K12102668	nialamide	Monoamine oxidase inhibitor
7214	-82.82	cp	BRD-K48932581	cetraxate	Mucus protecting agent
7211	-82.75	cp	BRD-K00312224	PPT	Estrogen receptor agonist
7208	-82.72	cp	BRD-A70649075	sulconazole	Sterol demethylase inhibitor
7209	-82.72	cp	BRD-K80451230	zamifenacin	Acetylcholine receptor antagonist
7206	-82.67	cp	BRD-K52080565	rilmenidine	Imidazoline receptor agonist
7201	-82.59	cp	BRD-K28360340	TW-37	BCL inhibitor
7200	-82.57	cp	BRD-K78485176	olmesartan	Angiotensin receptor antagonist
7198	-82.54	cp	BRD-A94756469	digoxin	ATPase inhibitor
7196	-82.53	cp	BRD-A20697603	thiostrepton	FOXM1 inhibitor
7192	-82.42	cp	BRD-K99749624	linifanib	PDGFR receptor inhibitor
7186	-82.34	cp	BRD-K99616396	motesanib	KIT inhibitor
7184	-82.29	cp	BRD-K64881305	ispinesib	Kinesin-like spindle protein inhibitor
7181	-82.26	cp	BRD-K89055274	alverine	Muscle relaxant
7179	-82.24	cp	BRD-K55127134	fluphenazine	Dopamine receptor antagonist
7178	-82.22	cp	BRD-K79092138	nitrofural	Bacterial DNA inhibitor
7177	-82.21	cp	BRD-K10995081	perphenazine	Dopamine receptor antagonist
7174	-82.19	cp	BRD-K41895714	AS-605240	PI3K inhibitor
7172	-82.16	cp	BRD-K84987553	MDM2-inhibitor	MDM inhibitor
7160	-81.89	cp	BRD-A80502530	cinobufagin	ATPase inhibitor
7156	-81.83	cp	BRD-A54596827	solifenacin	Acetylcholine receptor antagonist
7157	-81.83	cp	BRD-A19736161	ondansetron	Serotonin receptor antagonist
7154	-81.8	cp	BRD-K13169950	NSC-3852	HDAC inhibitor
7151	-81.7	cp	BRD-A39290993	cyproterone	Androgen receptor antagonist
7147	-81.55	cp	BRD-A75479906	rimantadine	Antiviral
7144	-81.52	cp	BRD-K06014311	DH-97	Melatonin receptor antagonist
7139	-81.43	cp	BRD-K15108141	gemcitabine	Ribonucleotide reductase inhibitor
7134	-81.34	cp	BRD-K08996725	zolantidine	Histamine receptor antagonist
7128	-81.2	cp	BRD-K96799727	pifithrin-mu	HSP inhibitor
7121	-81.06	cp	BRD-K02590140	O-2050	Cannabinoid receptor antagonist
7116	-81.03	cp	BRD-K21548250	moracizine	Sodium channel blocker
7111	-80.97	cp	BRD-K15409150	penfluridol	T-type calcium channel blocker
7103	-80.87	cp	BRD-A14208071	oxyphenonium	Cholinergic receptor antagonist
7099	-80.83	cp	BRD-K51318897	fenbendazole	Tubulin inhibitor
7095	-80.78	cp	BRD-K19796430	erismodegib	Smoothened receptor antagonist
7096	-80.78	cp	BRD-K83302049	protopine	Histamine receptor antagonist
7094	-80.76	cp	BRD-K70914287	BIBX-1382	EGFR inhibitor
7093	-80.75	cp	BRD-K00603606	ticlopidine	Purinergic receptor antagonist
7090	-80.7	cp	BRD-K60623809	SU-11652	Tyrosine kinase inhibitor
7086	-80.65	cp	BRD-K04546108	JAK3-inhibitor-VI	JAK inhibitor
7075	-80.4	cp	BRD-A61856038	tremulacin	Lipoxygenase inhibitor
7076	-80.4	cp	BRD-A67799922	phenoxybenzamine	Adrenergic receptor antagonist
7065	-80.21	cp	BRD-K66412701	pazufloxacin	Topoisomerase inhibitor
7063	-80.19	cp	BRD-K73196317	urapidil	Adrenergic receptor antagonist
7060	-80.06	cp	BRD-A65767837	hydrocortisone	Glucocorticoid receptor agonist
7058	-80.04	cp	BRD-K99029477	prometon	Photosynthesis inhibitor
7056	-79.99	cp	BRD-K21853356	RG-14620	EGFR inhibitor
7051	-79.8	cp	BRD-A79237180	ascorbic-acid	Antioxidant
7049	-79.76	cp	BRD-A06352418	terfenadine	Histamine receptor antagonist
7048	-79.71	cp	BRD-K06388322	pramipexole	Dopamine receptor agonist
7038	-79.61	cp	BRD-A00520476	otenzepad	Acetylcholine receptor antagonist
7035	-79.58	cp	BRD-K28907958	CD-437	Retinoid receptor agonist
7034	-79.54	cp	BRD-K07303502	arachidonyl-trifluoro-methane	Cytosolic phospholipase inhibitor
7027	-79.52	cp	BRD-K86595100	chlordiazepoxide	Benzodiazepine receptor agonist
7025	-79.48	cp	BRD-K91145395	prostratin	PKC activator
7021	-79.38	cp	BRD-K97309399	thiothixene	Dopamine receptor antagonist
7019	-79.28	cp	BRD-K41564320	purvalanol-b	Tyrosine kinase inhibitor
7008	-79.05	cp	BRD-A03216249	mepivacaine	Potassium channel blocker
7005	-78.99	cp	BRD-K86887724	dofetilide	Potassium channel blocker
7006	-78.99	cp	BRD-K49668410	clarithromycin	Bacterial 50S ribosomal subunit inhibitor
7003	-78.95	cp	BRD-K56343971	vemurafenib	RAF inhibitor
7000	-78.87	cp	BRD-K54095730	CMPD-1	p38 MAPK inhibitor
6998	-78.84	cp	BRD-A85280935	quinpirole	Dopamine receptor agonist
6995	-78.83	cp	BRD-K95885906	quercetagetin	PIM inhibitor
6993	-78.82	cp	BRD-K33882852	ZK-93423	Benzodiazepine receptor agonist
6992	-78.78	cp	BRD-K68202742	trichostatin-a	HDAC inhibitor
6989	-78.75	cp	BRD-A92630576	trimebutine	Opioid receptor agonist
6983	-78.63	cp	BRD-A09539288	homatropine	Acetylcholine receptor antagonist
6979	-78.57	cp	BRD-K50387473	XMD-892	MAP kinase inhibitor
6978	-78.56	cp	BRD-A06352508	SB-218078	CHK inhibitor
6976	-78.5	cp	BRD-A25569250	KI-16425	Lysophosphatidic acid receptor antagonist
6975	-78.47	cp	BRD-K64835161	BRD-K64835161	-666
6971	-78.41	cp	BRD-K92991072	PAC-1	Caspase activator
6968	-78.36	cp	BRD-K07888107	depudecin	HDAC inhibitor
6967	-78.35	cp	BRD-K60460488	nelfinavir	HIV protease inhibitor
6962	-78.29	cp	BRD-K39462424	dexchlorpheniramine	Histamine receptor antagonist
6963	-78.29	cp	BRD-K11373525	ZD-7155	Angiotensin receptor antagonist
6961	-78.28	cp	BRD-K65910366	KUC103904N	-666
6953	-78.09	cp	BRD-A30655177	LFM-A13	BTK inhibitor
6947	-77.98	cp	BRD-K73319509	PF-04217903	c-Met inhibitor
6948	-77.98	cp	BRD-K73978287	hydrocortisone	Glucocorticoid receptor agonist
6946	-77.96	cp	BRD-K59332007	linopirdine	Potassium channel blocker
6944	-77.93	cp	BRD-K07403598	CAY-10470	NFkB pathway inhibitor
6940	-77.8	cp	BRD-A17535965	gelsemine	Acetylcholine receptor antagonist
6938	-77.78	cp	BRD-A89434049	sarmentogenin	ATPase inhibitor
6937	-77.77	cp	BRD-K60762818	desipramine	Tricyclic antidepressant
6934	-77.68	cp	BRD-K29950728	clomifene	Estrogen receptor antagonist
6932	-77.67	cp	BRD-K95739795	tetrabenazine	Vesicular monoamine transporter inhibitor
6930	-77.66	cp	BRD-K13810148	givinostat	HDAC inhibitor
6931	-77.66	cp	BRD-K06221026	DUP-697	Cyclooxygenase inhibitor
6928	-77.59	cp	BRD-K75295174	alisertib	Aurora kinase inhibitor
6924	-77.51	cp	BRD-K24675965	LY-288513	CCK receptor antagonist
6923	-77.49	cp	BRD-K62056274	quipazine	Serotonin receptor agonist
6917	-77.4	cp	BRD-K99946902	hexylresorcinol	Local anesthetic
6916	-77.37	cp	BRD-K20755323	SA-792728	Sphingosine kinase inhibitor
6914	-77.36	cp	BRD-K37691127	hinokitiol	Tyrosinase inhibitor
6910	-77.28	cp	BRD-K08619838	tremorine	Acetylcholine receptor agonist
6909	-77.26	cp	BRD-K50135270	GBR-12935	Dopamine uptake inhibitor
6907	-77.23	cp	BRD-K32828673	chelidonine	Tubulin inhibitor
6905	-77.2	cp	BRD-K37561857	zardaverine	Phosphodiesterase inhibitor
6901	-77.17	cp	BRD-K96402602	farnesylthiotriazole	PPMTase inhibitor
6900	-77.12	cp	BRD-K29173907	isoflupredone	Glucocorticoid receptor agonist
6898	-77.09	cp	BRD-A53077924	tianeptine	Selective serotonin reuptake enhancer (SSRE)
6896	-77.07	cp	BRD-K01493881	apigenin	Casein kinase inhibitor
6893	-76.99	cp	BRD-K76907295	VU-0418947-2	HIF modulator
6894	-76.99	cp	BRD-A57382968	piroxicam	Cyclooxygenase inhibitor
6892	-76.97	cp	BRD-K61250553	loperamide	Opioid receptor agonist
6891	-76.92	cp	BRD-K30240666	clemastine	Histamine receptor antagonist
6886	-76.78	cp	BRD-K28168037	fenretinide	Apoptosis stimulant
6879	-76.59	cp	BRD-K77947974	fluspirilene	Dopamine receptor antagonist
6878	-76.56	cp	BRD-A93000692	ciglitazone	PPAR receptor agonist
6875	-76.48	cp	BRD-A96799240	4-hydroxyretinoic-acid	Retinoid receptor binder
6871	-76.43	cp	BRD-K95921201	reserpine	Vesicular monoamine transporter inhibitor
6865	-76.31	cp	BRD-K63516691	T-0156	Phosphodiesterase inhibitor
6864	-76.3	cp	BRD-K62012036	acitretin	Retinoid receptor agonist
6861	-76.28	cp	BRD-A22256192	terazosin	Adrenergic receptor antagonist
6860	-76.17	cp	BRD-K32412559	morphothebaine	Adrenergic receptor antagonist
6847	-76.06	cp	BRD-K65814004	diphenyleneiodonium	Nitric oxide synthase inhibitor
6845	-76.04	cp	BRD-K55748775	SCH-28080	ATPase inhibitor
6843	-76.01	cp	BRD-K03981224	ethisterone	Progestogen hormone
6840	-75.89	cp	BRD-K40742111	baeomycesic-acid	Lipoxygenase inhibitor
6837	-75.87	cp	BRD-A84134924	pancuronium	Acetylcholine receptor antagonist
6827	-75.64	cp	BRD-K33583600	isoliquiritigenin	Guanylate cyclase activator
6819	-75.49	cp	BRD-K77625572	etomoxir	Carnitine palmitoyltransferase inhibitor
6816	-75.44	cp	BRD-A93424738	dexamethasone	Glucocorticoid receptor agonist
6810	-75.32	cp	BRD-K21667562	AM-404	Cyclooxygenase inhibitor
6802	-75.17	cp	BRD-K59419204	AM-281	Cannabinoid receptor antagonist
6801	-75.14	cp	BRD-A84389091	L-655708	GABA receptor inverse agonist
6797	-75.11	cp	BRD-K39621635	artemether	Antimalarial
6796	-75.06	cp	BRD-A26002865	verrucarin-a	Protein synthesis inhibitor
6791	-74.94	cp	BRD-A60294240	tribenoside	Anti-inflammatory
6788	-74.93	cp	BRD-K25741894	skimmianine	Acetylcholinesterase inhibitor
6789	-74.93	cp	BRD-K36395411	SB-206553	Serotonin receptor antagonist
6790	-74.93	cp	BRD-A69512159	carbidopa	Aromatic L-amino acid decarboxylase inhibitor
6785	-74.86	cp	BRD-K43796186	benzyl-quinazolin-4-yl-amine	EGFR inhibitor
6784	-74.84	cp	BRD-K52020312	metronidazole	DNA inhibitor
6782	-74.8	cp	BRD-K23566484	nilutamide	Androgen receptor antagonist
6780	-74.78	cp	BRD-K92870997	pterostilbene	Cyclooxygenase inhibitor
6775	-74.67	cp	BRD-A16311756	profenamine	Butyrylcholinesterase inhibitor
6773	-74.59	cp	BRD-A10977446	carvedilol	Adrenergic receptor antagonist
6770	-74.51	cp	BRD-K54210043	NS-1619	Calcium channel activator
6765	-74.46	cp	BRD-K08890269	CO-102862	Sodium channel blocker
6764	-74.44	cp	BRD-K82561139	ricinine	Casein kinase inhibitor
6763	-74.43	cp	BRD-A30435184	metergoline	Dopamine receptor agonist
6756	-74.34	cp	BRD-K81062487	taurocholic-acid	Bile acid
6754	-74.29	cp	BRD-K70883034	nimetazepam	GABA receptor agonist
6752	-74.28	cp	BRD-K55454768	TAS-301	Calcium-calmodulin dependent protein kinase inhibitor
6749	-74.19	cp	BRD-K16233984	eriochrome-black-t	Azo dye
6745	-74.16	cp	BRD-K39670393	amthamine	Histamine receptor agonist
6744	-74.1	cp	BRD-A92161634	scopoline	Acetylcholine receptor antagonist
6740	-74.09	cp	BRD-A79903587	tegafur	Thymidylate synthase inhibitor
6741	-74.09	cp	BRD-K34776109	glimepiride	Insulin secretagogue
6735	-74.01	cp	BRD-A76279427	myriocin	Serine palmitoyltransferase inhibitor
6734	-74	cp	BRD-A39255369	DCPIB	Chloride channel blocker
6733	-73.95	cp	BRD-K04710043	hexamethylenebisacetamide	AKT inhibitor
6731	-73.93	cp	BRD-A33711280	metixene	Acetylcholine receptor antagonist
6730	-73.92	cp	BRD-K36153907	KU-C103885	Cystic fibrosis transmembrane conductance regulator inhibitor
6723	-73.73	cp	BRD-K25186396	tangeritin	Cell cycle inhibitor
6719	-73.69	cp	BRD-A66563878	medetomidine	Adrenergic receptor agonist
6717	-73.65	cp	BRD-K30296925	flavokavain-b	Antineoplastic
6716	-73.64	cp	BRD-A36066264	estradiol-benzoate	Estrogen receptor agonist
6713	-73.62	cp	BRD-K66206289	lobeline	Acetylcholine receptor antagonist
6714	-73.62	cp	BRD-K93460210	lamotrigine	Serotonin receptor antagonist
6715	-73.62	cp	BRD-A46393198	tetramisole	Immunostimulant
6710	-73.59	cp	BRD-K28806945	L-750667	Dopamine receptor antagonist
6706	-73.56	cp	BRD-K34995470	SU-1498	VEGFR inhibitor
6704	-73.55	cp	BRD-K13571841	pepstatin	Aspartic protease inhibitor
6703	-73.51	cp	BRD-A18579359	wiskostatin	Neural Wiskott-Aldrich syndrome protein inhibitor
6699	-73.47	cp	BRD-K78084463	W-12	Calmodulin antagonist
6697	-73.4	cp	BRD-K05104363	PD-184352	MEK inhibitor
6690	-73.34	cp	BRD-K15519488	CS-110266	Dopamine receptor agonist
6684	-73.26	cp	BRD-K59331372	SB-366791	TRPV antagonist
6683	-73.24	cp	BRD-A38030642	cyclosporin-a	Calcineurin inhibitor
6681	-73.22	cp	BRD-A87125127	3-matida	Glutamate receptor antagonist
6680	-73.21	cp	BRD-A23072235	pheniramine	Histamine receptor antagonist
6676	-73.05	cp	BRD-K63533170	AM-630	Cannabinoid receptor antagonist
6671	-72.95	cp	BRD-K74212935	ergocryptine	Dopamine agonist
6670	-72.92	cp	BRD-K13927029	retinol	Retinoid receptor ligand
6667	-72.82	cp	BRD-K07265709	razoxane	Chelating agent
6659	-72.71	cp	BRD-A25067867	benzatropine	Acetylcholine receptor antagonist
6653	-72.61	cp	BRD-A09056319	alfuzosin	Adrenergic receptor antagonist
6651	-72.58	cp	BRD-K20287671	SU-4312	PDGFR receptor inhibitor
6649	-72.46	cp	BRD-A47513740	calyculin	Protein phosphatase inhibitor
6648	-72.43	cp	BRD-K05528470	L-745870	Dopamine receptor antagonist
6647	-72.4	cp	BRD-K64755930	etazolate	Phosphodiesterase inhibitor
6646	-72.39	cp	BRD-K68756823	FR-180204	-666
6645	-72.38	cp	BRD-A96255180	ribavirin	Antiviral
6644	-72.35	cp	BRD-K80348542	cephaeline	Protein synthesis inhibitor
6640	-72.32	cp	BRD-A82656074	naltrindole	Opioid receptor antagonist
6639	-72.31	cp	BRD-A70514680	articaine	Local anesthetic
6634	-72.09	cp	BRD-K99063460	didanosine	Nucleoside reverse transcriptase inhibitor
6633	-72.01	cp	BRD-K18059238	gamma-linolenic-acid	Cyclooxygenase inhibitor
6631	-71.96	cp	BRD-K61269089	daphnetin	Protein kinase inhibitor
6624	-71.86	cp	BRD-A35519318	benidipine	Calcium channel blocker
6618	-71.72	cp	BRD-K81169441	cerivastatin	HMGCR inhibitor
6619	-71.72	cp	BRD-A35623999	CGP-37157	L-type calcium channel blocker
6614	-71.65	cp	BRD-K90259198	W-7	Calmodulin antagonist
6615	-71.65	cp	BRD-K82255054	propofol	GABA receptor agonist
6613	-71.64	cp	BRD-K07117950	imperatorin	CDK inhibitor
6612	-71.59	cp	BRD-K33106058	cytarabine	Ribonucleotide reductase inhibitor
6605	-71.45	cp	BRD-K06753942	nobiletin	MEK inhibitor
6600	-71.35	cp	BRD-A97674275	ranolazine	Sodium channel blocker
6599	-71.34	cp	BRD-K42221274	NNC-711	GAT inhibitor
6597	-71.28	cp	BRD-U86922168	QL-XII-47	BTK inhibitor
6592	-71.2	cp	BRD-M40783228	mesna	Antioxidant
6591	-71.18	cp	BRD-K19533706	tranilast	Angiogenesis inhibitor
6589	-71.17	cp	BRD-K01292756	pimozide	Dopamine receptor antagonist
6587	-71.14	cp	BRD-K54256913	MK-1775	WEE1 kinase inhibitor
6582	-71.05	cp	BRD-A39747742	estradiol-valerate	Estrogen receptor agonist
6581	-71.04	cp	BRD-A75517195	thiazolopyrimidine	CDC inhibitor
6579	-71.01	cp	BRD-K09397065	SR-57227A	Serotonin receptor agonist
6578	-70.99	cp	BRD-A63998256	helveticoside	ATPase inhibitor
6576	-70.96	cp	BRD-K51313569	palbociclib	CDK inhibitor
6565	-70.8	cp	BRD-A13807286	HA-14-1	BCL inhibitor
6562	-70.74	cp	BRD-A40639672	ketorolac	Cyclooxygenase inhibitor
6560	-70.69	cp	BRD-K06895174	cisapride	Serotonin receptor agonist
6557	-70.6	cp	BRD-K41160163	fenobam	Glutamate receptor antagonist
6551	-70.44	cp	BRD-K55420858	mirin	MRE11A exonuclease inhibitor
6546	-70.36	cp	BRD-A24191444	ifenprodil	Adrenergic receptor antagonist
6545	-70.33	cp	BRD-K33193182	methylnorlichexanthone	Aurora kinase inhibitor
6544	-70.29	cp	BRD-A16934955	nalbuphine	Opioid receptor agonist
6542	-70.14	cp	BRD-K82216340	medroxyprogesterone	progesterone receptor agonist
6538	-70.04	cp	BRD-K85090592	pilocarpine	Acetylcholine receptor agonist
6532	-69.94	cp	BRD-K62221994	T-98475	Gonadotropin releasing factor hormone receptor antagonist
6529	-69.92	cp	BRD-A23637604	oxymetholone	Androgen receptor agonist
6525	-69.85	cp	BRD-K61401890	deguelin	NADH-ubiquinone oxidoreductase (Complex I) inhibitor
6526	-69.85	cp	BRD-K51290057	SA-792709	Retinoid receptor agonist
6524	-69.84	cp	BRD-K71266197	PSB-06126	NTPDase inhibitor
6518	-69.79	cp	BRD-K06159959	CCMQ	Inhibitor of the binding of homoquinolinic acid to non-NMDA sensitive sites
6516	-69.77	cp	BRD-A58157837	butabindide	Tripeptidyl peptidase inhibitor
6515	-69.76	cp	BRD-A80960055	celastrol	Anti-inflammatory
6508	-69.6	cp	BRD-K66353228	zoxazolamine	Myorelaxant
6510	-69.6	cp	BRD-K67637637	olopatadine	Histamine receptor antagonist
6504	-69.51	cp	BRD-K02123250	JNJ-38877605	Tyrosine kinase inhibitor
6500	-69.5	cp	BRD-K05181463	L-741626	Dopamine receptor antagonist
6492	-69.38	cp	BRD-K06198550	isorotenone	Mitochondrial complex I inhibitor
6491	-69.37	cp	BRD-K18523449	mestanolone	Androgenic steroid
6487	-69.3	cp	BRD-K03319035	maprotiline	Norepinephrine reuptake inhibitor
6485	-69.28	cp	BRD-U44618005	WH-4023	SRC inhibitor
6483	-69.27	cp	BRD-K90976994	dehydrocholic-acid	Bile acid
6484	-69.27	cp	BRD-K17674993	diflorasone	Corticosteroid agonist
6482	-69.25	cp	BRD-K83988098	alvespimycin	HSP inhibitor
6474	-69.12	cp	BRD-K39746403	erythromycin	NFkB pathway inhibitor
6472	-69.07	cp	BRD-K81376179	TCS-359	FLT3 inhibitor
6470	-69.05	cp	BRD-K29733039	deforolimus	MTOR inhibitor
6468	-69.03	cp	BRD-K55430733	WAY-629	Serotonin receptor agonist
6465	-68.95	cp	BRD-K02113016	olaparib	PARP inhibitor
6451	-68.75	cp	BRD-K85871428	SC-68376	p38 MAPK inhibitor
6448	-68.67	cp	BRD-K09963420	saquinavir	HIV protease inhibitor
6446	-68.65	cp	BRD-K22227508	targinine	Nitric oxide synthase inhibitor
6443	-68.6	cp	BRD-A82371568	clofarabine	Ribonucleoside reductase inhibitor
6439	-68.52	cp	BRD-A72758037	asiatic-acid	Apoptosis stimulant
6435	-68.48	cp	BRD-K64610608	EMF-bca1-57	caspase inhibitor
6436	-68.48	cp	BRD-A56987319	SQ-22536	Adenylyl cyclase inhibitor
6434	-68.47	cp	BRD-K91442916	CAM-9-026	Membrane metalloendopeptidase inhibitor
6428	-68.35	cp	BRD-K13725475	rhodomyrtoxin	Cytotoxic agent
6421	-68.27	cp	BRD-K68143200	SA-792541	CDC inhibitor
6420	-68.26	cp	BRD-K00532621	midazolam	Benzodiazepine receptor agonist
6418	-68.24	cp	BRD-A89175223	bisoprolol	Adrenergic receptor antagonist
6419	-68.24	cp	BRD-K07881437	danusertib	Aurora kinase inhibitor
6416	-68.2	cp	BRD-K46018455	bezafibrate	PPAR receptor agonist
6412	-68.09	cp	BRD-K28761384	zuclopenthixol	Dopamine receptor antagonist
6409	-68.02	cp	BRD-A55756846	H-7	PKA inhibitor
6408	-68.01	cp	BRD-A13133631	fluorometholone	Glucocorticoid receptor agonist
6402	-67.94	cp	BRD-K77998258	ganglioside	SRC activator
6398	-67.87	cp	BRD-A66435872	HTMT	Histamine receptor agonist
6394	-67.84	cp	BRD-K52751261	TAK-715	p38 MAPK inhibitor
6389	-67.77	cp	BRD-K77133231	PD-169316	p38 MAPK inhibitor
6388	-67.74	cp	BRD-A31204924	mitotane	Antineoplastic
6387	-67.73	cp	BRD-A11813248	AM-92016	Potassium channel blocker
6383	-67.66	cp	BRD-K30697463	desoximetasone	Glucocorticoid receptor agonist
6381	-67.57	cp	BRD-K68095457	palmitoylethanolamide	Cannabinoid receptor agonist
6380	-67.52	cp	BRD-K97764662	PD-173074	FGFR inhibitor
6377	-67.49	cp	BRD-K70557564	zosuquidar	P-glycoprotein inhibitor
6374	-67.47	cp	BRD-K93658967	aloisine	CDK inhibitor
6370	-67.4	cp	BRD-K17743697	KB-R7943	Sodium/calcium exchange inhibitor
6365	-67.3	cp	BRD-K58299615	RO-90-7501	Beta amyloid inhibitor
6359	-67.1	cp	BRD-K82381502	acetylcholine	Acetylcholine receptor agonist
6336	-66.58	cp	BRD-K55344148	BU-224	Imidazoline receptor ligand
6334	-66.55	cp	BRD-K90027355	spironolactone	Mineralocorticoid receptor antagonist
6330	-66.54	cp	BRD-K03109492	NSC-663284	CDC inhibitor
6328	-66.51	cp	BRD-A65076780	dihydroergocristine	Adrenergic receptor antagonist
6327	-66.48	cp	BRD-K28578425	cilostamide	Phosphodiesterase inhibitor
6319	-66.34	cp	BRD-A09925278	etilefrine	Adrenergic receptor agonist
6310	-66.22	cp	BRD-A39052811	mosapride	Serotonin receptor agonist
6307	-66.18	cp	BRD-K79877282	PF-543	Sphingosine kinase inhibitor
6306	-66.14	cp	BRD-K86509404	iso-olomoucine	CDK inhibitor
6305	-66.1	cp	BRD-K69195780	NAN-190	Serotonin receptor agonist
6303	-66.06	cp	BRD-A07875874	cilnidipine	Calcium channel blocker
6297	-65.9	cp	BRD-K67831364	ZM-323881	VEGFR inhibitor
6292	-65.78	cp	BRD-K76064317	tyrphostin-AG-1296	FLT3 inhibitor
6288	-65.67	cp	BRD-K30649484	mafenide	Carbonic anhydrase inhibitor
6287	-65.66	cp	BRD-A55913614	primaquine	Antimalarial
6283	-65.6	cp	BRD-K19227686	phenolphthalein	Indicator dye
6281	-65.54	cp	BRD-K04111260	raclopride	Dopamine receptor antagonist
6279	-65.53	cp	BRD-A11135865	nor-binaltorphimine	Opioid receptor antagonist
6277	-65.45	cp	BRD-K66896231	BRD-K66896231	Acetylcholinesterase inhibitor
6276	-65.44	cp	BRD-K15891719	tenofovir	Reverse transcriptase inhibitor
6253	-65.09	cp	BRD-K88304388	dextrorphan	Glutamate receptor antagonist
6254	-65.09	cp	BRD-K42095107	daidzein	Estrogen receptor agonist
6243	-65	cp	BRD-K23369905	oxiconazole	Bacterial cell wall synthesis inhibitor
6233	-64.87	cp	BRD-K72541103	JAK3-inhibitor-I	JAK inhibitor
6225	-64.75	cp	BRD-A31312900	montelukast	Leukotriene receptor antagonist
6224	-64.74	cp	BRD-A24543851	nornicotine	Acetylcholine receptor agonist
6221	-64.62	cp	BRD-K29530284	amlexanox	Histamine receptor modulator
6215	-64.55	cp	BRD-K32836707	CAY-10577	Casein kinase inhibitor
6204	-64.41	cp	BRD-K82795137	loratadine	Histamine receptor antagonist
6193	-64.28	cp	BRD-A01643550	prednisolone	Glucocorticoid receptor agonist
6191	-64.23	cp	BRD-K02581333	protein-tyrosine-phosphatase-inhibitor-IV	Tyrosine phosphatase inhibitor
6189	-64.21	cp	BRD-K77175907	calcifediol	Vitamin D receptor agonist
6188	-64.17	cp	BRD-K51066026	aminoindazole	Ionophore
6182	-64.09	cp	BRD-K51816706	oxindole-I	VEGFR inhibitor
6183	-64.09	cp	BRD-A91866971	SQ-29548	Thromboxane receptor antagonist
6179	-64.07	cp	BRD-K02526760	QS-11	ARFGAP inhibitor
6180	-64.07	cp	BRD-K76304753	phenazopyridine	Local anesthetic
6177	-64.06	cp	BRD-K42452249	EO-1428	p38 MAPK inhibitor
6175	-64.02	cp	BRD-A60197193	amisulpride	Dopamine receptor antagonist
6172	-63.98	cp	BRD-A02176148	tubaic-acid	Mitochondrial complex I inhibitor
6170	-63.93	cp	BRD-K10098805	rhapontin	Apoptosis stimulant
6171	-63.93	cp	BRD-K55044200	amoxicillin	Penicillin binding protein inhibitor
6169	-63.91	cp	BRD-A52326238	isogedunin	HSP inhibitor
6163	-63.82	cp	BRD-K72676686	fluvoxamine	Selective serotonin reuptake inhibitor (SSRI)
6160	-63.77	cp	BRD-K13642330	cosmosiin	Cytochrome P450 inhibitor
6154	-63.7	cp	BRD-A74500471	ethambutol	Bacterial cell wall synthesis inhibitor
6151	-63.65	cp	BRD-A42423104	benproperine	Antitussive
6145	-63.55	cp	BRD-K28912512	nicotinamide	Protein synthesis stimulant
6142	-63.54	cp	BRD-K59637651	NSC-119889	Protein synthesis inhibitor
6135	-63.46	cp	BRD-A74907996	equol	Estrogen receptor agonist
6132	-63.44	cp	BRD-A97479839	piperidolate	Acetylcholine receptor antagonist
6129	-63.39	cp	BRD-A43940795	tetrahydropalmatine	Serotonin release inhibitor
6125	-63.37	cp	BRD-K52735702	cefdinir	Bacterial cell wall synthesis inhibitor
6126	-63.37	cp	BRD-A72988804	tiaprofenic-acid	Cyclooxygenase inhibitor
6119	-63.22	cp	BRD-K42142750	retrorsine	Antimitotic
6110	-63	cp	BRD-A15297126	fluocinonide	Glucocorticoid receptor agonist
6111	-63	cp	BRD-K38305202	domperidone	Dopamine receptor antagonist
6109	-62.96	cp	BRD-K82577285	dipropyl-dopamine	Dopamine receptor agonist
6102	-62.82	cp	BRD-K73824630	skatole	Thrombin inhibitor
6098	-62.76	cp	BRD-K25224017	pirenperone	Serotonin receptor antagonist
6095	-62.69	cp	BRD-K17868609	BRL-54443	Serotonin receptor agonist
6080	-62.35	cp	BRD-K57546357	prunetin	Breast cancer resistance protein inhibitor
6074	-62.24	cp	BRD-K64341947	CFM-1571	Guanylate cyclase activator
6071	-62.17	cp	BRD-K16621777	enobosarm	Androgen receptor modulator
6072	-62.17	cp	BRD-A75368507	demeclocycline	Bacterial 30S ribosomal subunit inhibitor
6061	-62.06	cp	BRD-K18135438	chenodeoxycholic-acid	11-beta-HSD1 inhibitor
6055	-62	cp	BRD-K75641298	metoclopramide	Dopamine receptor antagonist
6051	-61.96	cp	BRD-K93441486	diphemanil	Acetylcholine receptor antagonist
6047	-61.91	cp	BRD-K06712146	YM-90709	IL5 inhibitor
6046	-61.85	cp	BRD-K60038276	irbesartan	Angiotensin receptor antagonist
6044	-61.81	cp	BRD-K37447567	hydrocotarnine	Opioid receptor antagonist
6039	-61.72	cp	BRD-A75935363	atracurium	Acetylcholine receptor antagonist
6040	-61.72	cp	BRD-A41301928	bongkrek-acid	Mitochondrial ADP, ATP translocase inhibitor
6038	-61.71	cp	BRD-K02950022	BMS-299897	Gamma secretase inhibitor
6034	-61.67	cp	BRD-K26429091	J-104129	Acetylcholine receptor antagonist
6032	-61.64	cp	BRD-K60476892	YC-1	Guanylyl cyclase activator
6033	-61.64	cp	BRD-K78373679	RO-3306	CDK inhibitor
6027	-61.57	cp	BRD-K92758126	gibberellic-acid	NFkB pathway inhibitor
6021	-61.52	cp	BRD-A81233518	glycopyrrolate	Acetylcholine receptor antagonist
6011	-61.36	cp	BRD-K88759641	EMD-66684	Angiotensin receptor antagonist
6009	-61.28	cp	BRD-K33572481	taurodeoxycholic-acid	Bile acid
6006	-61.23	cp	BRD-K60298136	ITE	Aryl hydrocarbon receptor agonist
6005	-61.22	cp	BRD-K81128206	edrophonium	Acetylcholinesterase inhibitor
6000	-61.12	cp	BRD-K39965020	doconexent	PPAR receptor agonist
5998	-61.09	cp	BRD-A84327315	calcitriol	Vitamin D receptor agonist
5994	-61.04	cp	BRD-K62929068	6-benzylaminopurine	Purinergic receptor activator
5987	-60.95	cp	BRD-K85030058	benactyzine	Acetylcholine receptor antagonist
5988	-60.95	cp	BRD-K90524085	MY-5445	Phosphodiesterase inhibitor
5979	-60.7	cp	BRD-K12539581	nocodazole	Tubulin inhibitor
5977	-60.69	cp	BRD-K33312228	halometasone	Glucocorticoid receptor agonist
5976	-60.68	cp	BRD-K11801786	trimidox	Ribonucleotide reductase inhibitor
5959	-60.3	cp	BRD-K02227374	milnacipran	Serotonin reuptake inhibitor
5957	-60.28	cp	BRD-K68873215	phosphodiesterase-V-inhibitor-II	Phosphodiesterase inhibitor
5946	-60.08	cp	BRD-A61392169	eliprodil	Glutamate receptor antagonist
5944	-60.06	cp	BRD-K81876028	CP-93129	Serotonin receptor agonist
5943	-60.03	cp	BRD-K63195589	tipifarnib	Farnesyltransferase inhibitor
5941	-60.01	cp	BRD-K19462402	buflomedil	Adrenergic receptor antagonist
5934	-59.94	cp	BRD-A45889380	mepacrine	Cytokine production inhibitor
5924	-59.67	cp	BRD-A50928468	norgestrel	Progesterone receptor agonist
5921	-59.6	cp	BRD-K50495309	SRC-kinase-inhibitor-I	SRC inhibitor
5911	-59.48	cp	BRD-K96037667	norethindrone	Progesterone receptor agonist
5910	-59.47	cp	BRD-K28183345	proguanil	Dihydrofolate reductase inhibitor
5907	-59.35	cp	BRD-K47659338	EMD-386088	Serotonin receptor agonist
5903	-59.27	cp	BRD-K95763993	trapidil	PDGFR receptor inhibitor
5901	-59.23	cp	BRD-K50866992	tropisetron	Serotonin receptor antagonist
5896	-59.09	cp	BRD-A51182606	chloramphenicol	Protein synthesis inhibitor
5892	-59.01	cp	BRD-K45330754	diethylstilbestrol	Estrogen receptor agonist
5890	-58.98	cp	BRD-K03440695	boldine	Acetylcholine receptor antagonist
5886	-58.92	cp	BRD-K48722258	dilazep	Adenosine reuptake inhibitor
5882	-58.86	cp	BRD-K34330170	rotenonic-acid	Retinoid receptor antagonist
5881	-58.84	cp	BRD-K38251852	paxilline	Potassium channel blocker
5877	-58.7	cp	BRD-K92000912	AM-251	Cannabinoid receptor antagonist
5872	-58.64	cp	BRD-A27887842	prednisolone	Glucocorticoid receptor agonist
5868	-58.6	cp	BRD-A80641450	FR-139317	Endothelin receptor antagonist
5858	-58.38	cp	BRD-A66199457	asiaticoside	Antineoplastic
5852	-58.29	cp	BRD-A45664787	iloprost	Platelet aggregation inhibitor
5850	-58.28	cp	BRD-K40919711	BAPTA-AM	Potassium channel blocker
5845	-58.18	cp	BRD-K51302260	KU-C103871	GSP agonist
5838	-58.12	cp	BRD-K36616567	doxepin	Histamine receptor antagonist
5834	-58.1	cp	BRD-K51805276	temefos	Cholinesterase inhibitor
5835	-58.1	cp	BRD-A51714012	venlafaxine	Adrenergic inhibitor
5830	-58.01	cp	BRD-K97509413	coumestrol	Estrogen receptor agonist
5822	-57.81	cp	BRD-A86044036	flurbiprofen	Cyclooxygenase inhibitor
5816	-57.7	cp	BRD-K74236984	UNC-0321	Histone lysine methyltransferase inhibitor
5812	-57.68	cp	BRD-K92817986	BJM-CSC-19	MEK inhibitor
5793	-57.44	cp	BRD-A49225603	alimemazine	Histamine receptor agonist
5788	-57.37	cp	BRD-A68039575	liquiritigenin	Aromatase inhibitor
5786	-57.36	cp	BRD-K21283037	riluzole	Glutamate inhibitor
5783	-57.32	cp	BRD-K22010301	JLK-6	Gamma secretase inhibitor
5780	-57.3	cp	BRD-K74733595	APHA-compound-8	HDAC inhibitor
5781	-57.3	cp	BRD-K50464341	berbamine	Calmodulin antagonist
5771	-57.15	cp	BRD-K92446736	zatebradine	HCN channel blocker
5770	-57.14	cp	BRD-A07824748	flavanone	11-beta-HSD1 inhibitor
5760	-57.04	cp	BRD-K20338176	cefaclor	Bacterial cell wall synthesis inhibitor
5759	-57.03	cp	BRD-K07736136	VX-702	p38 MAPK inhibitor
5758	-56.98	cp	BRD-K56957086	dacinostat	HDAC inhibitor
5754	-56.94	cp	BRD-A85587465	bemesetron	Serotonin receptor antagonist
5753	-56.92	cp	BRD-K31627533	rimexolone	Glucocorticoid receptor agonist
5741	-56.81	cp	BRD-K24240364	GYKI-52466	Glutamate receptor antagonist
5739	-56.8	cp	BRD-A08877921	cephalotaxine	Protein synthesis inhibitor
5727	-56.58	cp	BRD-A10969569	ambelline	Plant alkaloid
5707	-56.29	cp	BRD-K75958195	pizotifen	Serotonin receptor antagonist
5708	-56.29	cp	BRD-K63945320	dihydrosamidin	Phospholipase inhibitor
5702	-56.23	cp	BRD-K65331431	retinyl	vitamin analog
5700	-56.22	cp	BRD-K44353683	nateglinide	Insulin secretagogue
5698	-56.19	cp	BRD-A78295502	hydroquinine	Antiarrhythmic
5694	-56.14	cp	BRD-K87226815	cycloserine	Bacterial cell wall synthesis inhibitor
5689	-56.1	cp	BRD-K13261168	LY-16350	Dopamine receptor agonist
5687	-56.07	cp	BRD-K43860855	iobenguane	Antineoplastic
5684	-55.98	cp	BRD-K91900765	VX-745	p38 MAPK inhibitor
5680	-55.92	cp	BRD-K74913225	brinzolamide	Carbonic anhydrase inhibitor
5678	-55.9	cp	BRD-A74904029	EI-231	Casein kinase inhibitor
5677	-55.85	cp	BRD-A87848830	bimatoprost	Prostanoid receptor agonist
5661	-55.52	cp	BRD-U44700465	HG-5-88-01	Protein kinase inhibitor
5658	-55.43	cp	BRD-K18619710	digoxigenin	Steroid
5654	-55.38	cp	BRD-K48735772	PD-158780	EGFR inhibitor
5651	-55.34	cp	BRD-A36471396	biperiden	Acetylcholine receptor antagonist
5650	-55.3	cp	BRD-K82823076	RO-15-4513	GABA benzodiazepine site receptor inverse agonist
5639	-55.14	cp	BRD-K32696739	noreleagnine	Monoamine oxidase inhibitor
5638	-55.11	cp	BRD-K36258877	AZ-10417808	Caspase inhibitor
5637	-55.1	cp	BRD-K12357156	AG-490	EGFR inhibitor
5632	-55.02	cp	BRD-A87719232	naproxen	Cyclooxygenase inhibitor
5628	-54.98	cp	BRD-K84663978	trequinsin	Phosphodiesterase inhibitor
5623	-54.81	cp	BRD-A95696820	acadesine	AMPK activator
5619	-54.77	cp	BRD-K25905511	buddleoflavonoloside	Acetylcholinesterase inhibitor
5615	-54.73	cp	BRD-A16700644	isoxsuprine	Adrenergic receptor agonist
5609	-54.67	cp	BRD-K62810658	PD-98059	MEK inhibitor
5604	-54.51	cp	BRD-A39646320	HC-toxin	HDAC inhibitor
5595	-54.35	cp	BRD-K75181824	acetyl-geranygeranyl-cysteine	Inhibitor of methyl esterification of geranylgeranylated proteins
5594	-54.33	cp	BRD-K94270326	ecopipam	Dopamine receptor antagonist
5589	-54.25	cp	BRD-K80639402	SB-258585	Serotonin receptor antagonist
5584	-54.2	cp	BRD-K93880783	stavudine	DNA directed DNA polymerase inhibitor
5583	-54.12	cp	BRD-A41112154	oleanolic-acid	G protein-coupled receptor agonist
5573	-53.89	cp	BRD-K72222507	quinapril	ACE inhibitor
5571	-53.88	cp	BRD-K71430621	clobenpropit	Histamine receptor antagonist
5572	-53.88	cp	BRD-A43849199	karakoline	Phytotoxin
5569	-53.86	cp	BRD-K34154330	tracazolate	GABA receptor modulator
5568	-53.85	cp	BRD-A95513702	androsta-1,4-dien-3,17-dione	Aromatase inhibitor
5566	-53.77	cp	BRD-K44094599	tacrolimus	Calcineurin inhibitor
5567	-53.77	cp	BRD-A99411506	esculin	Antioxidant
5563	-53.72	cp	BRD-K06234293	LY-364947	TGF beta receptor inhibitor
5561	-53.71	cp	BRD-K33308633	INCA-6	Calcineurin inhibitor
5548	-53.52	cp	BRD-K02265150	amoxapine	Norepinephrine reuptake inhibitor
5547	-53.5	cp	BRD-A83892713	rifampicin	RNA polymerase inhibitor
5540	-53.37	cp	BRD-K88551539	CAY-10585	HIF modulator
5539	-53.33	cp	BRD-M30523314	vinorelbine	Tubulin inhibitor
5537	-53.28	cp	BRD-K34170797	fexaramine	FXR agonist
5533	-53.23	cp	BRD-K68341547	W-9	Calmodulin antagonist
5532	-53.19	cp	BRD-A22844106	tenoxicam	Cyclooxygenase inhibitor
5531	-53.17	cp	BRD-K31987754	oleylethanolamide	Cannabinoid receptor agonist
5528	-53.14	cp	BRD-K82147103	lofepramine	Norepinephrine reuptake inhibitor
5529	-53.14	cp	BRD-K46469693	SCH-442416	Adenosine receptor antagonist
5518	-53.05	cp	BRD-A19661776	mianserin	Serotonin receptor antagonist
5514	-52.93	cp	BRD-A18620900	estriol	Estrogen receptor agonist
5507	-52.82	cp	BRD-K33396764	alpha-linolenic-acid	Omega 3 fatty acid stimulant
5508	-52.82	cp	BRD-K17378184	prestwick-559	Dopamine receptor agonist
5503	-52.81	cp	BRD-K20482099	rutin	Antioxidant
5501	-52.79	cp	BRD-K52459643	prostaglandin-e1	Prostanoid receptor agonist
5498	-52.74	cp	BRD-K06335600	tizanidine	Adrenergic receptor agonist
5493	-52.68	cp	BRD-K69837166	trap-101	Nociceptin/orphanin FQ (NOP) receptor antagonist
5490	-52.63	cp	BRD-K43330982	JTE-013	Lysophospholipid receptor antagonist
5489	-52.62	cp	BRD-K90789829	nefazodone	Adrenergic inhibitor
5485	-52.54	cp	BRD-A37052580	physostigmine	Acetylcholinesterase inhibitor
5486	-52.54	cp	BRD-A16754160	ampicillin	Bacterial cell wall synthesis inhibitor
5480	-52.41	cp	BRD-K74761218	WT-171	HDAC inhibitor
5478	-52.38	cp	BRD-K64746805	MBCQ	Phosphodiesterase inhibitor
5476	-52.36	cp	BRD-A21858158	praziquantel	Anthelmintic
5474	-52.33	cp	BRD-A74980173	gatifloxacin	Bacterial DNA gyrase inhibitor
5471	-52.29	cp	BRD-K34508425	KUC103898N	-666
5468	-52.23	cp	BRD-K76568384	PHTPP	Estrogen receptor antagonist
5465	-52.18	cp	BRD-K52620403	STO-609	Calmodulin antagonist
5459	-52.14	cp	BRD-K13087974	4,5-dianilinophthalimide	EGFR inhibitor
5449	-51.92	cp	BRD-A52193669	withaferin-a	IKK inhibitor
5448	-51.91	cp	BRD-A49765801	fludroxycortide	Glucocorticoid receptor agonist
5446	-51.85	cp	BRD-A83937277	mephenytoin	Hydantoin antiepileptic
5444	-51.81	cp	BRD-K14681867	somatostatin	Somatostatin receptor agonist
5438	-51.71	cp	BRD-K31843556	T-0070907	PPAR receptor antagonist
5430	-51.6	cp	BRD-K78599730	manumycin-a	Farnesyltransferase inhibitor
5425	-51.46	cp	BRD-A15010982	HU-211	Glutamate receptor antagonist
5414	-51.31	cp	BRD-K28470988	L-690330	Inositol monophosphatase inhibitor
5410	-51.22	cp	BRD-K82164249	andarine	Androgen receptor modulator
5407	-51.13	cp	BRD-K98530306	clonidine	Adrenergic receptor agonist
5403	-51.08	cp	BRD-K40645748	mefloquine	Adenosine receptor antagonist
5401	-51.05	cp	BRD-K45435259	SCH-23390	Dopamine receptor antagonist
5396	-50.92	cp	BRD-A44008656	doxylamine	Histamine receptor antagonist
5384	-50.79	cp	BRD-A10070317	propranolol	Adrenergic receptor antagonist
5380	-50.7	cp	BRD-K10016611	pyridine-2-aldoxime	Acetylcholinesterase inhibitor
5374	-50.56	cp	BRD-A77299732	salubrinal	Eukaryotic translation initiation factor inhibitor
5373	-50.53	cp	BRD-K49111258	prazosin	Adrenergic receptor antagonist
5369	-50.49	cp	BRD-K01567962	pyrazolanthrone	JNK inhibitor
5364	-50.45	cp	BRD-K54472332	elvitegravir	HIV integrase inhibitor
5363	-50.43	cp	BRD-A78377521	monastrol	Kinesin-like spindle protein inhibitor
5362	-50.39	cp	BRD-K87919739	tyrphostin-AG-825	Receptor tyrosine protein kinase inhibitor
5361	-50.37	cp	BRD-A35511923	L-803087	Somatostatin receptor agonist
5358	-50.3	cp	BRD-K84709232	caffeic-acid	Lipoxygenase inhibitor
5348	-50.15	cp	BRD-K88741031	methyl-2,5-dihydroxycinnamate	EGFR inhibitor
5343	-50.03	cp	BRD-K06854232	AM-580	Retinoid receptor agonist
5342	-50.02	cp	BRD-K83010055	VU-0415374-1	Glutamate receptor modulator
5336	-49.92	cp	BRD-A47144777	dihydro-7-desacetyldeoxygedunin	HSP inhibitor
5331	-49.89	cp	BRD-M41783010	acamprosate	Glutamate receptor antagonist
5328	-49.87	cp	BRD-A42831637	tetrahydrocannabinol-7-oic-acid	Anti-inflammatory
5329	-49.87	cp	BRD-A72066420	mifobate	PPAR receptor antagonist
5323	-49.83	cp	BRD-K96778649	tyrphostin-47	EGFR inhibitor
5324	-49.83	cp	BRD-A53576514	orphenadrine	Acetylcholine receptor antagonist
5320	-49.77	cp	BRD-K26548821	quinpirole	Dopamine receptor agonist
5312	-49.68	cp	BRD-K35240538	methylprednisolone	Glucocorticoid receptor agonist
5308	-49.61	cp	BRD-A37492983	iocetamic-acid	Radiopaque medium
5302	-49.56	cp	BRD-A35989968	megestrol	Progesterone receptor agonist
5301	-49.55	cp	BRD-A30205217	ethotoin	Hydantoin antiepileptic
5294	-49.39	cp	BRD-K63641886	cefuroxime	Bacterial cell wall synthesis inhibitor
5290	-49.38	cp	BRD-K32584078	BML-257	AKT inhibitor
5286	-49.33	cp	BRD-K25079130	avrainvillamide-analog-4	nucleophosmin inhibitor
5284	-49.32	cp	BRD-K23913458	coumarin	Vitamin K antagonist
5281	-49.28	cp	BRD-K49448285	bisindolylmaleimide	CDK inhibitor
5277	-49.18	cp	BRD-K52313696	tacedinaline	HDAC inhibitor
5272	-49.1	cp	BRD-K38197229	bumetanide	Solute carrier family member inhibitor
5271	-49.08	cp	BRD-K05181084	NGB-2904	Dopamine receptor antagonist
5267	-49.04	cp	BRD-A24817035	laudanosine	Central nervous system agent
5266	-49.01	cp	BRD-K36377456	marmesin	Angiogenesis inhibitor
5261	-48.94	cp	BRD-K81473089	tacrine	Acetylcholinesterase inhibitor
5258	-48.89	cp	BRD-A49160188	donepezil	Acetylcholinesterase inhibitor
5254	-48.82	cp	BRD-K77695569	tiabendazole	Angiogenesis inhibitor
5251	-48.79	cp	BRD-K21936341	oxotremorine	Acetylcholine receptor agonist
5249	-48.75	cp	BRD-K15588452	R-96544	Serotonin receptor antagonist
5235	-48.56	cp	BRD-K44779798	miglitol	Glucosidase inhibitor
5232	-48.54	cp	BRD-K11540476	EMF-BCA1-64	Caspase inhibitor
5233	-48.54	cp	BRD-A31195449	TCB2	Serotonin receptor agonist
5231	-48.53	cp	BRD-A16332958	modafinil	Adrenergic receptor agonist
5227	-48.43	cp	BRD-A73368467	fexofenadine	Histamine receptor antagonist
5219	-48.35	cp	BRD-K54142781	cirazoline	Adrenergic receptor agonist
5217	-48.29	cp	BRD-K43405658	tyrphostin-AG-527	Protein tyrosine kinase inhibitor
5209	-48.1	cp	BRD-K82357231	desloratadine	Histamine receptor antagonist
5210	-48.1	cp	BRD-A94413429	NTNCB	Neuropeptide receptor antagonist
5207	-48.06	cp	BRD-A41555725	chlortetracycline	Protein synthesis inhibitor
5206	-48.04	cp	BRD-K68402494	ML-9	Myosin light chain kinase inhibitor
5204	-48.03	cp	BRD-A14395271	mesoridazine	Dopamine receptor antagonist
5196	-47.93	cp	BRD-K11696279	BU-239	Imidazoline receptor agonist
5191	-47.77	cp	BRD-A05186015	bupropion	Dopamine uptake inhibitor
5190	-47.76	cp	BRD-A26384407	chlortalidone	Carbonic anhydrase inhibitor
5186	-47.58	cp	BRD-K47192521	icosapent	Platelet aggregation inhibitor
5176	-47.47	cp	BRD-K15842202	eudesmic-acid	-666
5174	-47.45	cp	BRD-A51410489	yohimbine	Adrenergic receptor antagonist
5165	-47.36	cp	BRD-A09495397	bicuculline	GABA receptor antagonist
5159	-47.26	cp	BRD-K14767410	SC-560	Cyclooxygenase inhibitor
5158	-47.23	cp	BRD-K62353524	DY-131	Estrogen receptor agonist
5157	-47.2	cp	BRD-K44497846	enalapril	ACE inhibitor
5148	-47.03	cp	BRD-A29426959	carbinoxamine	Histamine receptor antagonist
5146	-47	cp	BRD-A25004090	erastin	Ion channel antagonist
5145	-46.98	cp	BRD-K10466330	AVA	Nucleophosmin inhibitor
5142	-46.94	cp	BRD-A39415247	norethisterone	Progesterone receptor agonist
5135	-46.81	cp	BRD-K18036262	L-168049	Glucagon receptor antagonist
5131	-46.74	cp	BRD-K41707108	ceramide	Phosphoenolpyruvate carboxylase activator
5130	-46.72	cp	BRD-A64092382	mexiletine	Sodium channel blocker
5126	-46.7	cp	BRD-K15935639	z-leu3-VS	Proteasome inhibitor
5128	-46.7	cp	BRD-K08806317	timolol	Adrenergic receptor antagonist
5124	-46.68	cp	BRD-K55468218	spiperone	Dopamine receptor antagonist
5116	-46.46	cp	BRD-A78942461	ICI-118551	Adrenergic receptor antagonist
5112	-46.38	cp	BRD-K35559145	levomepromazine	Dopamine receptor antagonist
5110	-46.34	cp	BRD-K35687265	ON-01910	PLK inhibitor
5092	-45.95	cp	BRD-K05977823	tenovins	SIRT inhibitor
5091	-45.91	cp	BRD-K01555864	dibenzoylmethane	Antineoplastic
5075	-45.66	cp	BRD-A47633927	NPC-15199	ICAM1 antagonist
5070	-45.6	cp	BRD-U97083655	teicoplanin	Bacterial cell wall synthesis inhibitor
5068	-45.57	cp	BRD-K00206590	P-1075	ATP channel activator
5065	-45.54	cp	BRD-K78280988	anandamide	Cannabinoid receptor agonist
5064	-45.5	cp	BRD-K10573841	tunicamycin	GLCNAC phosphotransferase inhibitor
5057	-45.34	cp	BRD-K83508485	FK-888	Tachykinin antagonist
5052	-45.21	cp	BRD-K04877770	FTase-inhibitor-B581	Farnesyltransferase inhibitor
5051	-45.2	cp	BRD-K71799949	carbamazepine	Carboxamide antiepileptic
5047	-45.17	cp	BRD-K35941380	methysergide	Serotonin receptor antagonist
5048	-45.17	cp	BRD-K43468059	byssochlamic-acid	Mycotoxin
5044	-45.1	cp	BRD-K97799481	theophylline	Adenosine receptor antagonist
5040	-44.92	cp	BRD-K96720755	relcovaptan	Vasopressin receptor antagonist
5037	-44.88	cp	BRD-A83431637	resmethrin	Cytochrome P450 inhibitor
5026	-44.72	cp	BRD-K56745457	azauridine	Antiviral
5019	-44.65	cp	BRD-K28307902	flutamide	Androgen receptor antagonist
5017	-44.63	cp	BRD-K65639003	icariin	Phosphodiesterase inhibitor
5015	-44.6	cp	BRD-A05352148	ipratropium	Acetylcholine receptor antagonist
5011	-44.56	cp	BRD-K33818169	GW-3965	LXR agonist
5008	-44.53	cp	BRD-K30189597	SYK-inhibitor	SYK inhibitor
5005	-44.48	cp	BRD-K54704028	BAY-36-7620	Glutamate receptor antagonist
5002	-44.46	cp	BRD-K51485625	ritonavir	HIV protease inhibitor
4999	-44.32	cp	BRD-K29178788	dictamnine	Furoquinoline alkaloid
4995	-44.2	cp	BRD-K12219985	glipizide	Sulfonylurea
4991	-44.15	cp	BRD-A94669766	naringenin	Aromatase inhibitor
4987	-44.1	cp	BRD-A07395371	esmolol	Adrenergic receptor antagonist
4986	-44.09	cp	BRD-K08589866	linsitinib	IGF-1 inhibitor
4983	-44.05	cp	BRD-A51382177	fosinopril	ACE inhibitor
4975	-43.99	cp	BRD-K68558722	deracoxib	Cyclooxygenase inhibitor
4972	-43.95	cp	BRD-K40758068	efavirenz	HIV protease inhibitor
4968	-43.89	cp	BRD-K45158365	valsartan	Angiotensin receptor antagonist
4966	-43.88	cp	BRD-K70281171	U-99194	Dopamine receptor antagonist
4967	-43.88	cp	BRD-A65013509	oxybutynin	Acetylcholine receptor antagonist
4963	-43.8	cp	BRD-K79254416	decitabine	DNA methyltransferase inhibitor
4958	-43.73	cp	BRD-K62959606	sphingosine	Ceramidase inhibitor
4954	-43.64	cp	BRD-A49734948	foliosidine	Plant alkaloid
4941	-43.44	cp	BRD-A63043573	cabergoline	Dopamine receptor agonist
4931	-43.27	cp	BRD-K67506692	tyrphostin-AG-126	ERK1 and ERK2 phosphorylation inhibitor
4932	-43.27	cp	BRD-A36074203	remacemide	Glutamate receptor antagonist
4930	-43.25	cp	BRD-K49865102	PD-0325901	MEK inhibitor
4917	-43.06	cp	BRD-A01145011	zebularine	DNA methyltransferase inhibitor
4918	-43.06	cp	BRD-K73391359	quinisocaine	Local anesthetic
4916	-43.05	cp	BRD-K36009368	NNC-63-0532	Opioid receptor agonist
4905	-42.81	cp	BRD-K27665173	D-64406	PDGFR receptor inhibitor
4901	-42.74	cp	BRD-K39987650	bisacodyl	Laxative
4900	-42.68	cp	BRD-K10670311	sulfasalazine	Antirheumatic
4894	-42.66	cp	BRD-A64977602	mirtazapine	Adrenergic receptor antagonist
4891	-42.61	cp	BRD-K39339537	epirizole	Cyclooxygenase inhibitor
4888	-42.58	cp	BRD-K62310379	fluticasone	Glucocorticoid receptor agonist
4886	-42.54	cp	BRD-A41450521	tosufloxacin	Bacterial DNA gyrase inhibitor
4882	-42.49	cp	BRD-A72596465	GW-6471	PPAR receptor antagonist
4881	-42.47	cp	BRD-K22947005	dexbrompheniramine	Histamine receptor antagonist
4878	-42.42	cp	BRD-A71262238	nafadotride	Dopamine receptor antagonist
4875	-42.38	cp	BRD-K68264559	brimonidine	Adrenergic receptor agonist
4873	-42.32	cp	BRD-A17453586	MDL-72832	Serotonin receptor agonist
4865	-42.19	cp	BRD-K19352500	prochlorperazine	Dopamine receptor antagonist
4854	-42.03	cp	BRD-K32311154	nifekalant	Potassium channel blocker
4849	-42.01	cp	BRD-K49945136	GR-113808	Serotonin receptor antagonist
4851	-42.01	cp	BRD-K57886322	fluocinonide	Glucocorticoid receptor agonist
4842	-41.93	cp	BRD-K53561341	KIN001-220	Aurora kinase inhibitor
4836	-41.79	cp	BRD-K60174629	z-prolyl-prolinal	Prolyl endopeptidase inhibitor
4833	-41.76	cp	BRD-K81209512	AG-494	EGFR inhibitor
4832	-41.75	cp	BRD-K90574421	ipsapirone	Serotonin receptor agonist
4831	-41.74	cp	BRD-K50214219	CS-1657	PARP inhibitor
4814	-41.36	cp	BRD-A85234536	N6-cyclopentyladenosine	Adenosine receptor agonist
4815	-41.36	cp	BRD-K91601245	mercaptopurine	Immunosuppressant
4811	-41.26	cp	BRD-K15164005	apoptosis-activator-II	Carboxylesterase inhibitor
4804	-41.13	cp	BRD-K93080877	Ala-Ala-Phe-CMK	Tripeptidyl peptidase inhibitor
4799	-41.04	cp	BRD-A75769826	SDM25N	Opioid receptor antagonist
4798	-41.03	cp	BRD-K41337261	ZM-306416	ABL inhibitor
4788	-40.91	cp	BRD-A58048407	nimodipine	Calcium channel blocker
4785	-40.9	cp	BRD-K87510569	RS-504393	CC chemokine receptor antagonist
4782	-40.74	cp	BRD-A25143711	hydrocortisone	Glucocorticoid receptor agonist
4778	-40.68	cp	BRD-K01815685	indole	aryl hydrocarbon receptor agonist
4776	-40.66	cp	BRD-A64227845	SKF-77434	Dopamine receptor agonist
4769	-40.59	cp	BRD-K56064827	EI-273	PKC inhibitor
4763	-40.49	cp	BRD-K29653726	topiramate	Carbonic anhydrase inhibitor
4757	-40.41	cp	BRD-K15601958	SEW-2871	Lysophospholipid receptor agonist
4754	-40.36	cp	BRD-K96144918	mead-acid	KPL-1 tumor suppressor
4750	-40.26	cp	BRD-K46678324	RHO-kinase-inhibitor-II	Rho associated kinase inhibitor
4746	-40.22	cp	BRD-K10843433	phenylbutazone	Cyclooxygenase inhibitor
4743	-40.16	cp	BRD-K20995441	U-54494A	Opioid receptor agonist
4740	-40.14	cp	BRD-K19309090	SR-95639A	Acetylcholine receptor agonist
4732	-40.07	cp	BRD-K52219182	BRD-K52219182	Phosphodiesterase inhibitor
4731	-40.01	cp	BRD-A90311807	cilastatin	Dehydropeptidase inhibitor
4730	-39.98	cp	BRD-K02637541	celecoxib	Cyclooxygenase inhibitor
4718	-39.78	cp	BRD-K79353516	indolophenanthridine	CALY activator
4719	-39.78	cp	BRD-K39111395	BCL2-inhibitor	BCL inhibitor
4717	-39.69	cp	BRD-K91623615	ABT-751	Tubulin inhibitor
4711	-39.66	cp	BRD-K57930253	nitrazepam	Benzodiazepine receptor agonist
4705	-39.58	cp	BRD-A88774919	doxycycline	Bacterial 30S ribosomal subunit inhibitor
4697	-39.4	cp	BRD-K60184833	tyrphostin-46	Tyrosine kinase inhibitor
4695	-39.39	cp	BRD-A71009679	KUC103420N	-666
4694	-39.38	cp	BRD-A59303141	quinethazone	Thiazide diuretic
4692	-39.36	cp	BRD-K10860596	granisetron	Serotonin receptor antagonist
4689	-39.29	cp	BRD-A99571536	dubinidine	Anti-epileptic
4682	-39.16	cp	BRD-K35377380	I-OMe-AG-538	IGF-1 inhibitor
4678	-39.13	cp	BRD-A11605036	thiocolchicoside	GABA receptor antagonist
4677	-39.1	cp	BRD-A07000685	hydrocortisone	Glucocorticoid receptor agonist
4675	-39.06	cp	BRD-K72783841	tyrphostin-AG-555	EGFR inhibitor
4674	-39.05	cp	BRD-A78877355	nefopam	Cyclooxygenase inhibitor
4671	-39.04	cp	BRD-K07212038	selinidin	Mast cell stabilizer
4654	-38.7	cp	BRD-K18757346	U-46619	Thromboxane receptor agonist
4653	-38.69	cp	BRD-K54094468	remoxipride	Dopamine receptor antagonist
4651	-38.67	cp	BRD-K32821942	azathioprine	Dehydrogenase inhibitor
4647	-38.55	cp	BRD-K52075715	oxibendazole	Tubulin inhibitor
4643	-38.44	cp	BRD-K48869804	icilin	TRPV agonist
4640	-38.34	cp	BRD-K14880289	GW-501516	PPAR receptor agonist
4637	-38.21	cp	BRD-K85266041	DNQX	Glutamate receptor antagonist
4634	-38.13	cp	BRD-K91336023	mesulergine	Dopamine receptor agonist
4630	-38.1	cp	BRD-A81402010	KU-C103443N	CDC inhibitor
4627	-38.07	cp	BRD-K48115423	2-(4-methoxybenzylthio)-6-methylpyrimidin-4-ol	Matrix metalloprotease inhibitor
4619	-37.97	cp	BRD-K50384076	7,4'-dihydroxyflavone	Opioid receptor antagonist
4620	-37.97	cp	BRD-K03642198	AY-9944	Hedgehog pathway modulator
4611	-37.85	cp	BRD-K73109821	diazoxide	Potassium channel activator
4610	-37.84	cp	BRD-K48029790	OBAA	Phospholipase inhibitor
4609	-37.83	cp	BRD-K89375097	pirenzepine	Acetylcholine receptor antagonist
4599	-37.69	cp	BRD-K48935217	epothilone	Microtubule inhibitor
4595	-37.63	cp	BRD-K86600316	RS-79948	Adrenergic receptor antagonist
4594	-37.62	cp	BRD-K22828899	TUL-XXI039	Serine/threonine kinase inhibitor
4585	-37.5	cp	BRD-K50018155	RS-67506	Serotonin receptor partial agonist
4586	-37.5	cp	BRD-K54759182	dosulepin	Norepinephrine reuptake inhibitor
4583	-37.46	cp	BRD-K40901640	cinanserin	Serotonin receptor antagonist
4581	-37.45	cp	BRD-A51820102	econazole	Bacterial cell wall synthesis inhibitor
4582	-37.45	cp	BRD-K18909381	CGS-12066B	Serotonin receptor agonist
4576	-37.41	cp	BRD-A56892734	esomeprazole	ATPase inhibitor
4575	-37.39	cp	BRD-K53857191	risperidone	Dopamine receptor antagonist
4573	-37.38	cp	BRD-A73859745	glycodeoxycholic-acid	Apoptosis stimulant
4570	-37.33	cp	BRD-K91699951	benzonatate	Local anesthetic
4563	-37.17	cp	BRD-A65282128	cefazolin	Bacterial cell wall synthesis inhibitor
4561	-37.16	cp	BRD-K00615600	AG-14361	PARP inhibitor
4555	-37.08	cp	BRD-K26241953	piceatannol	SYK inhibitor
4554	-37.04	cp	BRD-K60060639	methyllidocaine	antiarrhythmic medication
4547	-36.88	cp	BRD-K90733503	cefalexin	Bacterial cell wall synthesis inhibitor
4542	-36.85	cp	BRD-K29905972	axitinib	PDGFR receptor inhibitor
4536	-36.73	cp	BRD-K88568253	iproniazid	Monoamine oxidase inhibitor
4535	-36.68	cp	BRD-K39823328	VU-0366037-2	Glutamate receptor modulator
4527	-36.63	cp	BRD-K86301799	dipyridamole	Phosphodiesterase inhibitor
4522	-36.54	cp	BRD-K79145749	dibenzepin	Norepinephrine reuptake inhibitor
4516	-36.48	cp	BRD-K71534238	GW-9508	Free fatty acid receptor agonist
4511	-36.36	cp	BRD-K51918615	iodophenpropit	Histamine receptor antagonist
4512	-36.36	cp	BRD-K15196155	IBC-293	Hydroxycarboxylic acid receptor agonist
4513	-36.36	cp	BRD-A02189320	met-leu-phe	-666
4509	-36.35	cp	BRD-K09991945	GSK-3-inhibitor-II	PKC inhibitor
4505	-36.27	cp	BRD-K83837640	JNJ-26854165	HDAC inhibitor
4503	-36.25	cp	BRD-A31007383	SDZ-WAG-994	Adenosine receptor agonist
4500	-36.19	cp	BRD-K54529596	captopril	ACE inhibitor
4497	-36.15	cp	BRD-K95202259	ML-3163	p38 MAPK inhibitor
4493	-36.09	cp	BRD-A28856712	tetryzoline	Adrenergic receptor agonist
4492	-36.08	cp	BRD-A09467419	mebeverine	Acetylcholine receptor antagonist
4486	-35.97	cp	BRD-K67783091	haloperidol	Dopamine receptor antagonist
4475	-35.84	cp	BRD-K11163873	phenanthridone	PARP inhibitor
4474	-35.81	cp	BRD-A51829654	BRL-15572	Serotonin receptor antagonist
4470	-35.79	cp	BRD-A29082194	gitoxigenin	ATPase inhibitor
4465	-35.73	cp	BRD-K47936004	piribedil	Dopamine receptor agonist
4464	-35.7	cp	BRD-K50660797	epicatechin	Bacterial DNA gyrase inhibitor
4463	-35.69	cp	BRD-A94543220	bifonazole	Sterol demethylase inhibitor
4458	-35.6	cp	BRD-K17415526	tyrphostin-AG-835	Protein tyrosine kinase inhibitor
4452	-35.54	cp	BRD-A31575449	CGP-20712	Adrenergic receptor antagonist
4448	-35.44	cp	BRD-K75532464	FTI-276	Farnesyltransferase inhibitor
4441	-35.32	cp	BRD-K03406345	azacitidine	DNA methyltransferase inhibitor
4439	-35.31	cp	BRD-K36737713	AG-957	Protein tyrosine kinase inhibitor
4438	-35.29	cp	BRD-K32795028	1-benzylimidazole	Thromboxane synthase inhibitor
4436	-35.22	cp	BRD-K56047318	RHC-80267	Triacylglycerol lipase inhibitor
4433	-35.2	cp	BRD-K11717138	benzbromarone	Chloride channel blocker
4430	-35.13	cp	BRD-A04553218	chlorphenamine	Histamine receptor antagonist
4424	-35.04	cp	BRD-K27710560	splitomycin	SIRT inhibitor
4419	-34.92	cp	BRD-K31633810	DAU-5884	Acetylcholine receptor antagonist
4415	-34.83	cp	BRD-K11853856	PJ-34	PARP inhibitor
4410	-34.79	cp	BRD-A99177642	deltaline	Acetylcholine receptor antagonist
4401	-34.67	cp	BRD-A85472596	L-670596	Prostanoid receptor antagonist
4394	-34.52	cp	BRD-K51677086	erythromycin	NFkB pathway inhibitor
4388	-34.42	cp	BRD-A02713983	dihydrodeoxygedunin	Growth factor receptor activator
4387	-34.41	cp	BRD-K53737926	amitriptyline	Norepinephrine inhibitor
4383	-34.36	cp	BRD-K14791739	fluticasone	Glucocorticoid receptor agonist
4380	-34.33	cp	BRD-A10420615	cyclopiazonic-acid	ATPase inhibitor
4377	-34.28	cp	BRD-A44133049	azasetron	Serotonin receptor antagonist
4373	-34.24	cp	BRD-K48367671	febuxostat	Xanthine oxidase inhibitor
4369	-34.2	cp	BRD-A43150328	penicillic-acid	other antibiotic
4365	-34.18	cp	BRD-K98684188	GSK-0660	PPAR receptor antagonist
4364	-34.14	cp	BRD-K89274813	DMP-543	Acetylcholine release stimulant
4361	-34.13	cp	BRD-K87142802	veliparib	PARP inhibitor
4358	-34.09	cp	BRD-A77291778	cyclopentolate	Acetylcholine receptor antagonist
4354	-34.06	cp	BRD-K97863768	prothionamide	Mycobacterium tuberculosis enoyl-[acyl-carrier-protein] reductase [NADH] (inhA) inhibitor
4355	-34.06	cp	BRD-A27143604	DPN	Estrogen receptor agonist
4351	-34.02	cp	BRD-K63265447	docetaxel	Tubulin inhibitor
4350	-34	cp	BRD-K88849294	lobaric-acid	Tyrosine phosphatase inhibitor
4345	-33.95	cp	BRD-K05977355	fluconazole	Sterol demethylase inhibitor
4342	-33.88	cp	BRD-A73605923	mocimycin	Protein synthesis inhibitor
4343	-33.88	cp	BRD-A39268308	epibatidine	Acetylcholine receptor agonist
4341	-33.86	cp	BRD-A22380646	pantoprazole	ATPase inhibitor
4336	-33.78	cp	BRD-A64228451	terreic-acid	BTK inhibitor
4331	-33.72	cp	BRD-A69917777	aminopentamide	Acetylcholine receptor antagonist
4325	-33.67	cp	BRD-K17796732	JWH-015	Cannabinoid receptor agonist
4324	-33.65	cp	BRD-A66927094	nemonapride	Dopamine receptor antagonist
4320	-33.56	cp	BRD-A20239487	atenolol	Adrenergic receptor antagonist
4317	-33.55	cp	BRD-A14966924	alaproclate	Serotonin receptor antagonist
4311	-33.4	cp	BRD-K39944607	ochratoxin-a	Phenylalanyl tRNA synthetase inhibitor
4310	-33.34	cp	BRD-K13926615	vardenafil	Phosphodiesterase inhibitor
4308	-33.32	cp	BRD-K46435977	valaciclovir	DNA polymerase inhibitor
4302	-33.15	cp	BRD-K26160755	RS-45041-190	Imidazoline receptor agonist
4303	-33.15	cp	BRD-K54411430	robustic-acid	cAMP inhibitor
4298	-33.04	cp	BRD-A41941932	vitexin	Antioxidant
4293	-32.94	cp	BRD-K52397688	amperozide	Dopamine receptor antagonist
4290	-32.91	cp	BRD-K02283807	GR-32191	Thromboxane receptor antagonist
4286	-32.85	cp	BRD-A94709349	metaxalone	Muscle relaxant
4285	-32.83	cp	BRD-K43149758	myricetin	Androgen receptor agonist
4281	-32.8	cp	BRD-K94841585	emodic-acid	Laxative
4277	-32.76	cp	BRD-A12560204	nitrendipine	Calcium channel blocker
4274	-32.69	cp	BRD-K41445866	alfaxalone	Chloride channel agonist
4270	-32.61	cp	BRD-A62182663	YK-4279	Apoptosis stimulant
4269	-32.6	cp	BRD-K41868777	W-5	Calmodulin antagonist
4265	-32.54	cp	BRD-K45479396	BP-554	Serotonin receptor agonist
4264	-32.51	cp	BRD-K09778810	FGIN-1-27	Inositol monophosphatase inhibitor
4258	-32.41	cp	BRD-K79404599	enzastaurin	PKC inhibitor
4259	-32.41	cp	BRD-A07780951	orciprenaline	Adrenergic receptor agonist
4257	-32.39	cp	BRD-K75699339	rizatriptan	Serotonin receptor agonist
4248	-32.31	cp	BRD-K95992530	Cyclo-[Arg-Gly-Asp-D-Phe-Val]	integrin antagonist
4244	-32.25	cp	BRD-K64402243	ivachtin	Caspase inhibitor
4242	-32.21	cp	BRD-K11399644	phenformin	AMPK activator
4241	-32.19	cp	BRD-A80213327	NSC-23766	Ras GTPase inhibitor
4236	-32.16	cp	BRD-A26095496	clobetasol	Glucocorticoid receptor agonist
4234	-32.12	cp	BRD-K67277431	picotamide	Thromboxane receptor antagonist
4232	-32.06	cp	BRD-K41567364	SB-334867	Orexin receptor antagonist
4218	-31.77	cp	BRD-K61341215	vecuronium	Acetylcholine receptor antagonist
4217	-31.76	cp	BRD-A09828896	SKF-81297	Dopamine receptor agonist
4213	-31.66	cp	BRD-K25394294	oxaprozin	Cyclooxygenase inhibitor
4211	-31.59	cp	BRD-A48261811	argatroban	Thrombin inhibitor
4209	-31.58	cp	BRD-K47278471	diphenhydramine	Histamine receptor antagonist
4210	-31.58	cp	BRD-A65597028	RX-821002	Adrenergic receptor antagonist
4207	-31.57	cp	BRD-A63667919	methylergometrine	Dopamine receptor antagonist
4204	-31.55	cp	BRD-K60511616	pravastatin	HMGCR inhibitor
4203	-31.54	cp	BRD-K68103045	CGS-20625	Benzodiazepine receptor agonist
4201	-31.49	cp	BRD-K94689771	pinocembrin	CYP1B1 inhibitor
4185	-31.17	cp	BRD-K02965346	SU-11274	Hepatocyte growth factor receptor inhibitor
4186	-31.17	cp	BRD-K49456190	prima-1-met	thioredoxin inhibitor
4184	-31.14	cp	BRD-K03842655	penitrem-a	Potassium channel blocker
4183	-31.09	cp	BRD-A09722536	cyclophosphamide	DNA alkylating agent
4181	-31.07	cp	BRD-A31801025	formestane	Aromatase inhibitor
4179	-31.04	cp	BRD-K37792168	denbufylline	Phosphodiesterase inhibitor
4176	-31	cp	BRD-K47943470	tyrphostin-51	EGFR inhibitor
4173	-30.94	cp	BRD-A33168282	sotalol	Adrenergic receptor antagonist
4171	-30.93	cp	BRD-A96456596	FPL-55712	Leukotriene receptor antagonist
4170	-30.86	cp	BRD-K09764130	mead-ethanolamide	Cannabinoid receptor agonist
4168	-30.84	cp	BRD-K05350981	oligomycin-c	ATPase inhibitor
4163	-30.78	cp	BRD-K74112339	acetohydroxamic-acid	Urease inhibitor
4164	-30.78	cp	BRD-K20655524	mefexamide	Psychoactive drug
4157	-30.7	cp	BRD-K64994968	progesterone	Progesterone receptor agonist
4152	-30.65	cp	BRD-K93461745	buspirone	Serotonin receptor agonist
4150	-30.53	cp	BRD-K61177364	NBI-27914	CRF receptor antagonist
4149	-30.49	cp	BRD-K50422030	clomethiazole	GABA receptor antagonist
4146	-30.45	cp	BRD-K00656370	6-aminochrysene	Transferase inhibitor
4140	-30.34	cp	BRD-K14993104	bemegride	Chemoreceptor agonist
4132	-30.13	cp	BRD-K09471561	levofloxacin	Bacterial DNA gyrase inhibitor
4131	-30.12	cp	BRD-K99922388	DPO-1	Potassium channel blocker
4129	-29.99	cp	BRD-K89152108	liothyronine	Thyroid hormone stimulant
4125	-29.92	cp	BRD-K68437527	EMF-bca1-60	caspase inhibitor
4121	-29.89	cp	BRD-K09635314	M-3M3FBS	phospholipase activator
4122	-29.89	cp	BRD-A92585442	RU-28318	Cytochrome P450 inhibitor
4118	-29.81	cp	BRD-K68332390	ponalrestat	Aldose reductase inhibitor
4115	-29.76	cp	BRD-A59215453	lobelanidine	Acetylcholine receptor antagonist
4113	-29.7	cp	BRD-K33453211	levocabastine	Histamine receptor antagonist
4109	-29.64	cp	BRD-K41051431	mecillinam	Bacterial cell wall synthesis inhibitor
4106	-29.61	cp	BRD-K93618743	ipriflavone	Bone resorption inhibitor
4104	-29.6	cp	BRD-K47780086	penciclovir	DNA directed DNA polymerase inhibitor
4103	-29.58	cp	BRD-A02759312	betaxolol	Adrenergic receptor antagonist
4099	-29.51	cp	BRD-K18618618	cimetidine	Histamine receptor antagonist
4095	-29.44	cp	BRD-K81521265	dicyclohexylurea	Epoxide hydolase inhibitor
4091	-29.39	cp	BRD-K27737647	H-89	PKA inhibitor
4087	-29.37	cp	BRD-K20714604	RS-56812	Serotonin receptor partial agonist
4088	-29.37	cp	BRD-A63836183	PD-123319	Angiotensin receptor antagonist
4084	-29.31	cp	BRD-K60274257	dephostatin	Tyrosine phosphatase inhibitor
4080	-29.28	cp	BRD-K01095011	finasteride	5-alpha reductase inhibitor
4081	-29.28	cp	BRD-A68929948	DAPT-GSI-IX	Gamma secretase inhibitor
4078	-29.25	cp	BRD-K37194137	III606050	Cytochrome P450 inhibitor
4072	-29.18	cp	BRD-K33459542	ditolylguanidine	Sigma receptor agonist
4070	-29.16	cp	BRD-K12513978	fenbufen	Cyclooxygenase inhibitor
4060	-29.07	cp	BRD-K38003476	clocortolone	Glucocorticoid receptor agonist
4058	-29.03	cp	BRD-A09533288	verapamil	Calcium channel blocker
4054	-29.01	cp	BRD-K48300629	zonisamide	Sodium channel blocker
4047	-28.91	cp	BRD-K96084870	DMBI	PDGFR receptor inhibitor
4042	-28.83	cp	BRD-K64670467	JNJ-16259685	Glutamate receptor antagonist
4040	-28.8	cp	BRD-K94830329	ataluren	CFTR channel agonist
4027	-28.58	cp	BRD-K22193694	dioxybenzone	Topical sunscreen agent
4026	-28.5	cp	BRD-K17294426	clebopride	Dopamine receptor antagonist
4023	-28.46	cp	BRD-A67981824	cefotaxime	Bacterial cell wall synthesis inhibitor
4024	-28.46	cp	BRD-K94379058	BML-190	Cannabinoid receptor inverse agonist
4020	-28.41	cp	BRD-K81783531	VX-222	HCV inhibitor
4021	-28.41	cp	BRD-A37817666	picrotoxin	GABA receptor antagonist
4012	-28.25	cp	BRD-A25234499	aminoglutethimide	Glucocorticoid receptor antagonist
4010	-28.22	cp	BRD-A65550283	ginsenoside	Steroid hormone receptor agonist
4003	-28.14	cp	BRD-A67748489	K3644	Kinesin-like spindle protein inhibitor
3990	-27.96	cp	BRD-K57222227	indometacin	Cyclooxygenase inhibitor
3983	-27.9	cp	BRD-A98431941	ephedrine	Adrenergic receptor agonist
3979	-27.84	cp	BRD-K78294846	osthol	Calcium channel blocker
3975	-27.74	cp	BRD-K18250272	propoxycaine	Local anesthetic
3968	-27.65	cp	BRD-K83963101	MLN-8054	Aurora kinase inhibitor
3964	-27.61	cp	BRD-A37837077	cyclazosin	Adrenergic receptor antagonist
3962	-27.59	cp	BRD-K67352070	TC-2559	Acetylcholine receptor agonist
3955	-27.45	cp	BRD-A84189516	baccatin-III	Paclitaxel precursor
3950	-27.39	cp	BRD-K64310881	MW-STK33-3B	Potassium channel activator
3945	-27.24	cp	BRD-K54314721	zolmitriptan	Serotonin receptor agonist
3946	-27.24	cp	BRD-K82865713	prostaglandin-b2	cAMP inhibitor
3942	-27.21	cp	BRD-K63784565	BRD-K63784565	Topoisomerase inhibitor
3941	-27.2	cp	BRD-A41833852	naloxone	Opioid receptor antagonist
3936	-27.09	cp	BRD-K01663662	diphenidol	Acetylcholine receptor agonist
3933	-27.01	cp	BRD-K50398167	meclofenamic-acid	Cyclooxygenase inhibitor
3930	-27	cp	BRD-K63151507	MNITMT	Lymphocyte inhibitor
3928	-26.98	cp	BRD-K37080523	isoreserpine	Vesicular monoamine transporter inhibitor
3925	-26.95	cp	BRD-K89125793	tinidazole	Antiprotozoal
3924	-26.94	cp	BRD-K44876623	zolpidem	Benzodiazepine receptor agonist
3921	-26.88	cp	BRD-K47323024	methapyrilene	Histamine receptor antagonist
3916	-26.72	cp	BRD-K61314889	IWR-1-ENDO	PARP inhibitor
3910	-26.63	cp	BRD-K56403959	ZK-756326	CC chemokine receptor ligand
3909	-26.62	cp	BRD-A39390670	rabeprazole	ATPase inhibitor
3907	-26.59	cp	BRD-A45140972	meclocycline	Bacterial 30S ribosomal subunit inhibitor
3904	-26.57	cp	BRD-A99833829	bethanechol	Acetylcholine receptor agonist
3902	-26.56	cp	BRD-K10974103	diloxanide	Protein synthesis inhibitor
3898	-26.47	cp	BRD-K64451768	GANT-58	GLI antagonist
3899	-26.47	cp	BRD-K90333595	phentolamine	Adrenergic receptor antagonist
3889	-26.34	cp	BRD-K14536225	piceid	Glucosidase inhibitor
3888	-26.33	cp	BRD-K06147391	telenzepine	Acetylcholine receptor antagonist
3876	-26.08	cp	BRD-K27141178	SB-203186	Serotonin receptor antagonist
3872	-26.03	cp	BRD-K72903603	zidovudine	Reverse transcriptase inhibitor
3865	-25.9	cp	BRD-A01346607	flumetasone	Glucocorticoid receptor agonist
3861	-25.86	cp	BRD-K69600043	thiethylperazine	Dopamine receptor antagonist
3859	-25.83	cp	BRD-K94920105	DR-2313	PARP inhibitor
3847	-25.68	cp	BRD-K32247306	primidone	GABA receptor antagonist
3845	-25.67	cp	BRD-K40887525	ritanserin	Serotonin receptor antagonist
3842	-25.63	cp	BRD-K57569181	pentoxifylline	Phosphodiesterase inhibitor
3840	-25.62	cp	BRD-K51662849	ilomastat	Matrix metalloprotease inhibitor
3833	-25.5	cp	BRD-K18678457	ZD-7288	HCN channel blocker
3831	-25.49	cp	BRD-K62609077	scoulerine	Adrenergic receptor antagonist
3832	-25.49	cp	BRD-K46424862	hymecromone	Monoamine oxidase inhibitor
3830	-25.45	cp	BRD-A36217750	sulfinpyrazone	Uricosuric blocker
3824	-25.32	cp	BRD-A80383043	BRD-A80383043	Glutamate receptor agonist
3818	-25.25	cp	BRD-K12260308	xanthoxyline	Antifungal
3816	-25.21	cp	BRD-A97730597	hexylcaine	Sodium channel blocker
3815	-25.2	cp	BRD-K45446451	JZL-184	Monoacylglucerol lipase inhibitor
3814	-25.16	cp	BRD-K43764301	dexketoprofen	Cyclooxygenase inhibitor
3811	-25.11	cp	BRD-K75478907	GS-39783	GABA receptor modulator
3812	-25.11	cp	BRD-K81839095	estrone	Estrogen receptor agonist
3806	-25.09	cp	BRD-K55191674	benzylpenicillin	Penicillin binding protein inhibitor
3801	-25.05	cp	BRD-K59753975	vindesine	Tubulin inhibitor
3800	-25.03	cp	BRD-K18574842	nafcillin	Bacterial cell wall synthesis inhibitor
3798	-25.02	cp	BRD-K51541829	RO-25-6981	Ionotropic glutamate receptor antagonist
3797	-25.01	cp	BRD-K15834839	lobendazole	Anthelmintic
3785	-24.71	cp	BRD-A50311610	meclozine	CAR agonist
3784	-24.7	cp	BRD-K03670461	tyrphostin-AG-82	EGFR inhibitor
3782	-24.64	cp	BRD-A46179541	doxapram	Potassium channel blocker
3781	-24.6	cp	BRD-A48720949	testosterone	androgen receptor agonist
3778	-24.57	cp	BRD-K46068882	eugenitol	Bacterial quorum sensing inhibitor
3775	-24.54	cp	BRD-K36627727	tamibarotene	Retinoid receptor agonist
3771	-24.45	cp	BRD-K19284129	salvinorin-a	Opioid receptor agonist
3768	-24.42	cp	BRD-A77722753	hydralazine	Vasodilator
3766	-24.39	cp	BRD-A92670106	tocainide	Sodium channel blocker
3764	-24.38	cp	BRD-K94353609	fluocinolone	Glucocorticoid receptor agonist
3761	-24.33	cp	BRD-K33211335	dextromethorphan	Glutamate receptor antagonist
3758	-24.32	cp	BRD-K04185004	oxybuprocaine	Local anesthetic
3757	-24.3	cp	BRD-K20742498	RS-39604	Serotonin receptor antagonist
3756	-24.29	cp	BRD-K03600606	catechin	Beta secretase inhibitor
3753	-24.23	cp	BRD-A17655518	ibuprofen	Cyclooxygenase inhibitor
3738	-24.03	cp	BRD-A70268693	PG-9	Acetylcholine receptor agonist
3734	-23.94	cp	BRD-A54490543	pirlindole	Monoamine oxidase inhibitor
3731	-23.86	cp	BRD-K82846253	repaglinide	Insulin secretagogue
3728	-23.79	cp	BRD-A98378129	talniflumate	Cyclooxygenase inhibitor
3727	-23.73	cp	BRD-K46137903	prednicarbate	Phospholipase activator
3723	-23.65	cp	BRD-A04706586	bucladesine	Adenosine receptor agonist
3720	-23.61	cp	BRD-K10177585	PSB-11	Adenosine receptor antagonist
3719	-23.57	cp	BRD-K37848908	ceforanide	Penicillin binding protein inhibitor
3716	-23.5	cp	BRD-K27721098	clopidogrel	Purinergic receptor antagonist
3710	-23.39	cp	BRD-K79366068	PSB-069	NTPDase inhibitor
3705	-23.33	cp	BRD-K56115039	BU-226	Imidazoline receptor ligand
3701	-23.26	cp	BRD-K45296539	ZD-7114	Adrenergic receptor agonist
3692	-23.11	cp	BRD-K57631554	aminolevulinic-acid	Oxidizing agent
3690	-23.04	cp	BRD-K78838262	austricine	Hypolipidemic
3689	-22.96	cp	BRD-K66615216	moxifloxacin	Bacterial DNA gyrase inhibitor
3687	-22.9	cp	BRD-K08252256	diclofenac	Cyclooxygenase inhibitor
3680	-22.84	cp	BRD-K99595596	salsolinol	Monoamine oxidase inhibitor
3668	-22.57	cp	BRD-K24201553	SB-269970	Serotonin receptor antagonist
3667	-22.55	cp	BRD-K65146499	nabumetone	Cyclooxygenase inhibitor
3664	-22.49	cp	BRD-K98157055	SIB-1757	Glutamate receptor antagonist
3662	-22.46	cp	BRD-A01593789	chlormadinone	5-alpha reductase inhibitor
3659	-22.45	cp	BRD-K09485525	GANT-61	GLI antagonist
3655	-22.37	cp	BRD-A04352665	maraviroc	CC chemokine receptor antagonist
3654	-22.35	cp	BRD-K15933101	ropinirole	Dopamine receptor agonist
3653	-22.34	cp	BRD-K45401373	betulinic-acid	Apoptosis stimulant
3651	-22.33	cp	BRD-A75402480	desoxycorticosterone	Mineralocorticoid receptor agonist
3649	-22.3	cp	BRD-K30570479	VU-0400195-3	Glutamate receptor modulator
3647	-22.27	cp	BRD-K82562631	tolmetin	Cyclooxygenase inhibitor
3642	-22.19	cp	BRD-K32710582	EI-247	IGF-1 inhibitor
3643	-22.19	cp	BRD-K67100011	pivmecillinam	Bacterial cell wall synthesis inhibitor
3640	-22.16	cp	BRD-K87158025	benzamil	Sodium channel blocker
3637	-22.13	cp	BRD-K35128472	2-aminopurine	Serine/threonine kinase inhibitor
3627	-21.96	cp	BRD-K53790871	triamcinolone	Glucocorticoid receptor agonist
3623	-21.9	cp	BRD-K16551401	PNU-22394	Serotonin receptor agonist
3621	-21.88	cp	BRD-A77349281	RK-682	Tyrosine phosphatase inhibitor
3608	-21.72	cp	BRD-K56558538	ambroxol	Sodium channel blocker
3602	-21.59	cp	BRD-K53318339	vinpocetine	Phosphodiesterase inhibitor
3601	-21.57	cp	BRD-A20126139	medrysone	Glucocorticoid receptor agonist
3599	-21.54	cp	BRD-K76617868	fasudil	Rho associated kinase inhibitor
3597	-21.5	cp	BRD-K71003802	hippeastrine	Plant alkaloid
3595	-21.49	cp	BRD-K52172416	anastrozole	Aromatase inhibitor
3594	-21.47	cp	BRD-A19195498	trimipramine	Norepinephrine reuptake inhibitor
3589	-21.41	cp	BRD-K27450477	EHNA	Adenosine deaminase inhibitor
3588	-21.4	cp	BRD-K71823332	epothilone-a	Microtubule stabilizing agent
3585	-21.39	cp	BRD-K12244279	MEK1-2-inhibitor	MEK inhibitor
3580	-21.24	cp	BRD-A65280694	molindone	Dopamine receptor antagonist
3575	-21.18	cp	BRD-K76908866	CP-724714	EGFR inhibitor
3574	-21.16	cp	BRD-K16277217	piperacetazine	Dopamine receptor antagonist
3572	-21.11	cp	BRD-K41903098	diphenoxylate	Opioid receptor agonist
3570	-21.09	cp	BRD-K99107520	felbamate	Glutamate receptor antagonist
3569	-21.04	cp	BRD-K32164935	tolazamide	ATP channel blocker
3567	-21.02	cp	BRD-K62736196	guanabenz	-666
3565	-20.99	cp	BRD-K53878242	MMPX	Phosphodiesterase inhibitor
3564	-20.98	cp	BRD-K70301876	escitalopram	Selective serotonin reuptake inhibitor (SSRI)
3559	-20.9	cp	BRD-A93477898	PETCM	Caspase activator
3551	-20.67	cp	BRD-K76534306	enrofloxacin	Bacterial DNA gyrase inhibitor
3549	-20.64	cp	BRD-K04414442	SB-222200	Tachykinin antagonist
3543	-20.51	cp	BRD-K56509348	BMS-182874	Endothelin receptor antagonist
3542	-20.5	cp	BRD-A00267231	hemado	Adenosine receptor agonist
3540	-20.44	cp	BRD-A43082555	loxoprofen	Cyclooxygenase inhibitor
3537	-20.41	cp	BRD-K30020243	aliskiren	Antihypertensive
3530	-20.33	cp	BRD-K02404261	caffeine	Adenosine receptor antagonist
3528	-20.29	cp	BRD-A36318220	necrostatin-1	RIPK inhibitor
3523	-20.2	cp	BRD-K67680372	CI-966	GAT inhibitor
3521	-20.16	cp	BRD-K81225797	SCH-58261	Adenosine receptor antagonist
3517	-20.06	cp	BRD-K75089421	procainamide	Sodium channel blocker
3516	-20.05	cp	BRD-A59174698	ritodrine	Adrenergic receptor agonist
3513	-20.03	cp	BRD-K62200014	anagrelide	Phosphodiesterase inhibitor
3511	-20.02	cp	BRD-A28422058	L-689560	Glutamate receptor antagonist
3510	-19.95	cp	BRD-K44899736	RO-16-6941	Monoamine oxidase inhibitor
3508	-19.94	cp	BRD-K16195444	oxymetazoline	Adrenergic receptor agonist
3509	-19.94	cp	BRD-A70083328	secnidazole	Acetylcholinesterase inhibitor
3504	-19.88	cp	BRD-K51476772	ST-638	Tyrosine kinase inhibitor
3501	-19.86	cp	BRD-K93332168	isocarboxazid	Monoamine oxidase inhibitor
3493	-19.72	cp	BRD-A13946108	sulindac	Cyclooxygenase inhibitor
3491	-19.7	cp	BRD-K74402642	NSC-632839	Ubiquitin specific protease inhibitor
3485	-19.53	cp	BRD-A13650332	flucloxacillin	Bacterial cell wall synthesis inhibitor
3482	-19.47	cp	BRD-K06980535	promazine	Dopamine receptor antagonist
3480	-19.45	cp	BRD-K02953697	naringin	Cytochrome P450 inhibitor
3477	-19.4	cp	BRD-K80725632	lavendustin-c	EGFR inhibitor
3475	-19.39	cp	BRD-K40619305	larixinic-acid	Compound that interacts with metal centers
3473	-19.36	cp	BRD-A16665823	butoconazole	Bacterial cell wall synthesis inhibitor
3469	-19.32	cp	BRD-K69032158	diprotin-a	Dipeptidyl peptidase inhibitor
3464	-19.25	cp	BRD-K61993165	niacin	NAD precursor with lipid lowering effects
3461	-19.06	cp	BRD-K79425933	benperidol	Dopamine receptor antagonist
3458	-19.03	cp	BRD-K88789588	letrozole	Aromatase inhibitor
3455	-18.99	cp	BRD-K23335153	AMN-082	Glutamate receptor modulator
3454	-18.97	cp	BRD-K93433262	alfacalcidol	Vitamin D receptor agonist
3452	-18.96	cp	BRD-K59273480	propentofylline	Adenosine reuptake inhibitor
3446	-18.91	cp	BRD-K46212057	voriconazole	Cytochrome P450 inhibitor
3447	-18.91	cp	BRD-A11007541	BCI-hydrochloride	Protein phosphatase inhibitor
3448	-18.91	cp	BRD-K28936863	ketotifen	Histamine receptor agonist
3444	-18.88	cp	BRD-K81729199	AQ-RA741	Acetylcholine receptor antagonist
3440	-18.77	cp	BRD-K84639753	safinamide	Dopamine uptake inhibitor
3441	-18.77	cp	BRD-K22662435	ganciclovir	DNA polymerase inhibitor
3437	-18.76	cp	BRD-K34533029	tyrphostin-AG-494	EGFR inhibitor
3435	-18.75	cp	BRD-A16694057	bisphenol-a	PPAR receptor antagonist
3436	-18.75	cp	BRD-A29485665	bicalutamide	Androgen receptor antagonist
3434	-18.71	cp	BRD-K35573744	erbstatin-analog	EGFR inhibitor
3431	-18.7	cp	BRD-K49372556	mofezolac	Cyclooxygenase inhibitor
3425	-18.63	cp	BRD-K24526313	levcromakalim	Potassium channel activator
3426	-18.63	cp	BRD-A08709697	heliotrine	Pyrrolizidine alkaloid
3424	-18.61	cp	BRD-K69688083	mestinon	Cholinesterase inhibitor
3423	-18.6	cp	BRD-K17110974	aristolochic-acid	Phospholipase inhibitor
3417	-18.51	cp	BRD-K66782112	BRD-K66782112	Histamine receptor antagonist
3414	-18.39	cp	BRD-A32949107	MRS-1845	Calcium channel blocker
3408	-18.31	cp	BRD-A62035778	scopolamine	Acetylcholine receptor antagonist
3406	-18.26	cp	BRD-K91243525	SR-142948	Neurotensin receptor antagonist
3405	-18.25	cp	BRD-A16478930	amcinonide	Glucocorticoid receptor agonist
3403	-18.22	cp	BRD-K59753853	MDL-29951	Glutamate receptor antagonist
3397	-18.15	cp	BRD-A10715913	sulpiride	Dopamine receptor antagonist
3394	-18.13	cp	BRD-A10903566	imiloxan	Adrenergic receptor antagonist
3386	-17.95	cp	BRD-A50684349	fenoldopam	Dopamine receptor agonist
3379	-17.86	cp	BRD-A42628519	iopanoic-acid	Radiopaque medium
3376	-17.75	cp	BRD-K29458283	chlorambucil	DNA inhibitor
3372	-17.7	cp	BRD-K92760278	riboflavin	Vitamin B
3370	-17.68	cp	BRD-K25875056	SC-9	Protein tyrosine kinase activator
3368	-17.66	cp	BRD-K49027941	PSB-1115	Adenosine receptor antagonist
3366	-17.62	cp	BRD-K65417056	meprylcaine	Local anesthetic
3355	-17.4	cp	BRD-K54416256	methimazole	Antithyroid
3356	-17.4	cp	BRD-K78692225	leflunomide	Dihydroorotate dehydrogenase inhibitor
3351	-17.29	cp	BRD-K55703048	latrepirdine	Glutamate receptor antagonist
3349	-17.26	cp	BRD-K88611939	aniracetam	Glutamate receptor agonist
3346	-17.24	cp	BRD-K83322645	L-693403	Sigma receptor agonist
3344	-17.2	cp	BRD-K30197592	5-methoxytryptamine	Serotonin receptor agonist
3334	-17.08	cp	BRD-K43736954	cortisone	Glucocorticoid receptor agonist
3333	-17.07	cp	BRD-A73581086	ergometrine	Adrenergic receptor agonist
3331	-17.06	cp	BRD-K47150025	KI-8751	VEGFR inhibitor
3329	-17.05	cp	BRD-K79437791	acetyl-farnesyl-cysteine	Inhibitor of methylation of endogenous isoprenylated proteins
3326	-17.02	cp	BRD-K80738081	resveratrol	Cytochrome P450 inhibitor
3325	-16.98	cp	BRD-K11634954	GBR-13069	Dopamine uptake inhibitor
3324	-16.95	cp	BRD-K39915878	loxapine	Dopamine receptor antagonist
3323	-16.86	cp	BRD-K38436528	imipramine	Norepinephrine reuptake inhibitor
3307	-16.6	cp	BRD-K85383046	IAA-94	Chloride channel blocker
3308	-16.6	cp	BRD-K07220430	cinnarizine	Calcium channel blocker
3306	-16.59	cp	BRD-A77050075	heraclenol	Vitamin K antagonist
3305	-16.55	cp	BRD-K31611373	fluprostenol	Prostanoid receptor agonist
3304	-16.54	cp	BRD-K62374253	rufloxacin	Bacterial DNA gyrase inhibitor
3302	-16.51	cp	BRD-K88871508	lisuride	Dopamine receptor agonist
3300	-16.49	cp	BRD-A91699651	chloroquine	Antimalarial
3296	-16.33	cp	BRD-K89402695	L-655240	Thromboxane receptor antagonist
3291	-16.15	cp	BRD-K50891186	GR-103691	Dopamine receptor antagonist
3287	-16.03	cp	BRD-A65145453	ATPA	Glutamate receptor agonist
3284	-15.95	cp	BRD-K04170657	psoromic-acid	Ras GTPase inhibitor
3283	-15.92	cp	BRD-K92413528	thiazolidinecarboxylic-acid	Reducing agent
3268	-15.77	cp	BRD-K40227168	vinburnine	Adrenergic receptor antagonist
3265	-15.74	cp	BRD-K14888893	minoxidil	KATP activator
3262	-15.71	cp	BRD-K05901394	terguride	Dopamine receptor agonist
3260	-15.7	cp	BRD-K13819402	desoxypeganine	Acetylcholinesterase inhibitor
3258	-15.63	cp	BRD-A52172093	VU-0413807-2	Calcium channel blocker
3259	-15.63	cp	BRD-K97061094	azacyclonol	Histamine receptor antagonist
3248	-15.46	cp	BRD-K35629949	SR-27897	CCK receptor antagonist
3240	-15.24	cp	BRD-K26801045	pipamperone	Dopamine receptor antagonist
3237	-15.17	cp	BRD-K01612348	meropenem	Bacterial cell wall synthesis inhibitor
3236	-15.16	cp	BRD-K26134695	calpeptin	Calpain inhibitor
3229	-14.97	cp	BRD-K06024458	n-arachidonyl-GABA	cannabinoid receptor agonist
3228	-14.96	cp	BRD-K97118047	4,5,6,7-tetrabromobenzotriazole	Casein kinase inhibitor
3222	-14.83	cp	BRD-K10870738	CDC	Lipoxygenase inhibitor
3218	-14.81	cp	BRD-K45068323	W-13	Calmodulin antagonist
3219	-14.81	cp	BRD-A81866333	CGS-21680	Adenosine receptor agonist
3216	-14.77	cp	BRD-K08973992	linoleic-acid	Oxidative stress inducer
3211	-14.72	cp	BRD-K70778732	trazodone	Adrenergic receptor antagonist
3208	-14.68	cp	BRD-K30480208	torasemide	Electrolyte reabsorption inhibitor
3206	-14.65	cp	BRD-K87990216	piretanide	Glucocorticoid receptor agonist
3187	-14.34	cp	BRD-K10065684	dantron	Laxative
3183	-14.25	cp	BRD-A29734509	disopyramide	Sodium channel blocker
3182	-14.23	cp	BRD-K97158071	droperidol	Dopamine receptor antagonist
3178	-14.14	cp	BRD-K81709173	halcinonide	Glucocorticoid receptor agonist
3177	-14.09	cp	BRD-K16664969	GTP-14564	FLT3 inhibitor
3175	-13.97	cp	BRD-K82135108	elesclomol	Oxidative stress inducer
3173	-13.95	cp	BRD-A62021152	WAY-161503	Serotonin receptor agonist
3170	-13.91	cp	BRD-A75478957	PD-166793	Metalloproteinase inhibitor
3168	-13.83	cp	BRD-A76093993	cromakalim	Potassium channel activator
3162	-13.66	cp	BRD-M72442222	vicriviroc	CC chemokine receptor antagonist
3163	-13.66	cp	BRD-A62057054	MDL-11939	Serotonin receptor antagonist
3158	-13.62	cp	BRD-A14798026	mestranol	Estrogen receptor agonist
3156	-13.57	cp	BRD-K63504947	semaxanib	VEGFR inhibitor
3155	-13.52	cp	BRD-K05395900	nicotine	Acetylcholine receptor agonist
3152	-13.45	cp	BRD-A64479082	quinidine	Sodium channel blocker
3146	-13.37	cp	BRD-A61858259	CAY-10415	Insulin sensitizer
3147	-13.37	cp	BRD-K14221570	benzopurpurin-4b	HIV entry inhibitor
3144	-13.35	cp	BRD-K14765469	vesamicol	Acetylcholinesterase inhibitor
3145	-13.35	cp	BRD-K08998509	fananserin	Dopamine receptor antagonist
3143	-13.34	cp	BRD-K54771420	glycocholic-acid	Cholesterol inhibitor
3140	-13.31	cp	BRD-K69556541	ryanodine	Calcium channel blocker
3138	-13.24	cp	BRD-A96897502	U-74389F	Lipid peroxidase inhibitor
3136	-13.22	cp	BRD-K29555132	arachidonamide	Cannabinoid receptor agonist
3137	-13.22	cp	BRD-K42679050	Y-27152	Potassium channel activator
3135	-13.21	cp	BRD-K38903228	hesperidin	Flavanone glycoside
3129	-13.03	cp	BRD-K75615183	talipexole	Adrenergic receptor agonist
3128	-13.02	cp	BRD-A52588987	SKF-83566	Dopamine receptor antagonist
3127	-13	cp	BRD-K40990712	hexamethyleneamiloride	Sodium/hydrogen antiport inhibitor
3126	-12.99	cp	BRD-A72441487	stiripentol	GABA uptake inhibitor
3117	-12.82	cp	BRD-A92177080	betamethasone	Glucocorticoid receptor agonist
3113	-12.78	cp	BRD-K63550407	erythromycin	NFkB pathway inhibitor
3112	-12.73	cp	BRD-U94846492	quinine	Hemozoin biocrystallization inhibitor
3111	-12.71	cp	BRD-A95939040	sertaconazole	Sterol demethylase inhibitor
3106	-12.63	cp	BRD-K49890030	gavestinel	Glutamate receptor antagonist
3105	-12.62	cp	BRD-K63923597	barasertib	Aurora kinase inhibitor
3099	-12.49	cp	BRD-K82091397	SB-239063	p38 MAPK inhibitor
3097	-12.42	cp	BRD-K40902647	vincamine	Adrenergic receptor antagonist
3085	-12.26	cp	BRD-K95655893	MAZ-51	VEGFR inhibitor
3080	-12.19	cp	BRD-K47679368	bromfenac	Cyclooxygenase inhibitor
3079	-12.16	cp	BRD-K41170226	deoxycholic-acid	G protein-coupled receptor agonist
3076	-12.13	cp	BRD-K89348303	ramipril	ACE inhibitor
3069	-12.03	cp	BRD-K00317371	RITA	MDM inhibitor
3068	-12	cp	BRD-K63150726	JTE-907	Cannabinoid receptor inverse agonist
3066	-11.97	cp	BRD-A43882281	pinacidil	ATP channel activator
3063	-11.93	cp	BRD-K26657438	imiquimod	TLR agonist
3061	-11.9	cp	BRD-K77771411	moxonidine	Imidazoline receptor agonist
3055	-11.82	cp	BRD-K05906022	limonin	HIV protease inhibitor
3056	-11.82	cp	BRD-A35912562	pregnenolone	Glutamate receptor modulator
3042	-11.46	cp	BRD-K98493452	honokiol	AKT inhibitor
3036	-11.34	cp	BRD-A39969961	eplerenone	Cytochrome P450 inhibitor
3034	-11.3	cp	BRD-A93255169	thalidomide	TNF production inhibitor
3029	-11.14	cp	BRD-K87932577	CDK1-5-inhibitor	CDK inhibitor
3022	-10.85	cp	BRD-K96527333	dehydroisoandosterone	GABA receptor modulator
3019	-10.71	cp	BRD-A81177136	KN-62	Calcium-calmodulin dependent protein kinase inhibitor
3015	-10.64	cp	BRD-K13544237	r(-)-propylnorapomorphine	Dopamine receptor agonist
3014	-10.63	cp	BRD-K54987996	CAY-10578	Casein kinase inhibitor
3012	-10.62	cp	BRD-K19136521	indirubin	CDK inhibitor
3009	-10.6	cp	BRD-K85503079	perospirone	Dopamine receptor antagonist
3007	-10.47	cp	BRD-A96485169	EBPC	Aldose reductase inhibitor
3003	-10.37	cp	BRD-A54487287	cortisone	Glucocorticoid receptor agonist
2999	-10.31	cp	BRD-A26711594	nicardipine	Calcium channel blocker
2993	-10.18	cp	BRD-K76587808	fraxetin	Antioxidant
2994	-10.18	cp	BRD-K79602928	metformin	Insulin sensitizer
2991	-10.14	cp	BRD-K36862742	hydroflumethiazide	Sodium/potassium/chloride transporter inhibitor
2989	-10.07	cp	BRD-K04430056	7-nitroindazole	nitric oxide synthase inhibitor
2986	-9.97	cp	BRD-K95899059	LY-344864	Serotonin receptor agonist
2984	-9.96	cp	BRD-K92015269	GBR-12783	Dopamine uptake inhibitor
2982	-9.9	cp	BRD-A48257147	PHCCC	Glutamate receptor agonist
2979	-9.82	cp	BRD-K89839824	raltitrexed	Thymidylate synthase inhibitor
2976	-9.8	cp	BRD-K89162000	tandutinib	FLT3 inhibitor
2977	-9.8	cp	BRD-K50417881	eticlopride	Dopamine receptor antagonist
2971	-9.59	cp	BRD-A42553870	L-152804	Neuropeptide receptor antagonist
2970	-9.54	cp	BRD-A09094913	strychnine	Acetylcholine receptor antagonist
2968	-9.49	cp	BRD-K68620903	dydrogesterone	Progesterone receptor agonist
2964	-9.44	cp	BRD-K60923938	veratridine	Sodium channel activator
2959	-9.22	cp	BRD-K10136726	tosyllysyl-chloromethyl-ketone	Chymotrypsin inhibitor
2954	-9.02	cp	BRD-A44448661	pentobarbital	Barbiturate antiepileptic
2951	-8.96	cp	BRD-K02275692	cefotiam	Bacterial cell wall synthesis inhibitor
2950	-8.95	cp	BRD-K47761761	PD-168077	Dopamine receptor agonist
2949	-8.93	cp	BRD-A84389633	tropanyl-3,5-dimethylbenzoate	Serotonin receptor antagonist
2947	-8.91	cp	BRD-K67977190	eprosartan	Angiotensin receptor antagonist
2944	-8.72	cp	BRD-K21450440	benzthiazide	Carbonic anhydrase inhibitor
2940	-8.58	cp	BRD-A00100033	nifurtimox	DNA inhibitor
2934	-8.3	cp	BRD-A88282067	delcorine	Antiarrhythmic
2933	-8.19	cp	BRD-K94512704	spiramide	Dopamine receptor antagonist
2924	-8.1	cp	BRD-K03557653	sappanone-a	Tyrosinase inhibitor
2921	-8.08	cp	BRD-A80638690	floxuridine	DNA synthesis inhibitor
2918	-8.04	cp	BRD-K02867583	minaprine	Serotonin reuptake inhibitor
2917	-8.03	cp	BRD-K31553034	zibotentan	Endothelin receptor antagonist
2916	-8.02	cp	BRD-K29359156	ebselen	H+/K+-ATPase inhibitor
2913	-8	cp	BRD-K81916719	triclabendazole	Microtubule inhibitor
2914	-8	cp	BRD-A91008255	bepridil	Calcium channel blocker
2912	-7.99	cp	BRD-K64614248	salicin	Anti-inflammatory
2911	-7.87	cp	BRD-A61793559	metolazone	Carbonic anhydrase inhibitor
2907	-7.76	cp	BRD-K77171813	proxyfan	Histamine receptor modulator
2902	-7.69	cp	BRD-K17008822	BD-1008	Sigma receptor antagonist
2899	-7.55	cp	BRD-K64245000	GW-4064	FXR agonist
2897	-7.46	cp	BRD-A62525898	prednisone	Glucocorticoid receptor agonist
2898	-7.46	cp	BRD-A00993607	alprenolol	Adrenergic receptor antagonist
2895	-7.37	cp	BRD-K62996583	lidoflazine	Calcium channel blocker
2890	-7.32	cp	BRD-A38747044	KU-14R	Imidazoline receptor ligand
2889	-7.19	cp	BRD-A65671304	candesartan	Angiotensin receptor antagonist
2886	-7.15	cp	BRD-K28346421	rifapentine	RNA polymerase inhibitor
2883	-7.02	cp	BRD-K26674531	GR-235	Estrogen receptor agonist
2881	-6.93	cp	BRD-K68190965	GR-46611	Serotonin receptor agonist
2874	-6.69	cp	BRD-A01826957	xanthinol	Vasodilator
2870	-6.45	cp	BRD-K92778217	mefenamic-acid	Cyclooxygenase inhibitor
2861	-5.95	cp	BRD-U01690642	acetyl-geranyl-cysteine	Isoprenylated protein methylation inhibitor
2854	-5.7	cp	BRD-K50938786	ropivacaine	Sodium channel blocker
2853	-5.67	cp	BRD-K09631521	thiotepa	Cytochrome P450 inhibitor
2842	-5.15	cp	BRD-K28029915	dolasetron	Serotonin receptor antagonist
2840	-5.06	cp	BRD-K40213712	SAL-1	Adenosine receptor antagonist
2839	-5.04	cp	BRD-K96271548	coumaric-acid	Antioxidant
2836	-4.87	cp	BRD-K73982490	BI-78D3	JNK inhibitor
2835	-4.82	cp	BRD-K71499074	diclofenamide	Carbonic anhydrase inhibitor
2832	-4.73	cp	BRD-K86958018	olvanil	TRPV agonist
2831	-4.58	cp	BRD-K95676198	JAK3-inhibitor-V	JAK inhibitor
2826	-4.27	cp	BRD-K85402309	dovitinib	EGFR inhibitor
2821	-3.38	cp	BRD-K42098891	protriptyline	Tricyclic antidepressant
2820	-3.19	cp	BRD-A71157293	fursultiamine	Vitamin B
2810	2.09	cp	BRD-K06467078	corynanthine	Adrenergic receptor antagonist
2803	3.51	cp	BRD-K09907482	PRL-3-inhibitor-I	Tyrosine phosphatase inhibitor
2798	4.26	cp	BRD-K13211965	L-741742	Dopamine receptor antagonist
2797	4.47	cp	BRD-K14693417	cinchonine	P-glycoprotein inhibitor
2796	4.72	cp	BRD-K69690935	curcumin	Cyclooxygenase inhibitor
2793	5.22	cp	BRD-K84996949	sinensetin	Cyclooxygenase inhibitor
2785	6	cp	BRD-K28849549	mesalazine	Cyclooxygenase inhibitor
2782	6.13	cp	BRD-K32526544	DCEBIO	Potassium channel activator
2781	6.25	cp	BRD-A71203467	l-stepholidine	Dopamine receptor antagonist
2780	6.36	cp	BRD-A32349859	methyl-angolensate	Apoptosis inhibitor
2779	6.38	cp	BRD-K99447003	enalaprilat	ACE inhibitor
2774	6.84	cp	BRD-K83597974	pargyline	Monoamine oxidase inhibitor
2772	7.08	cp	BRD-K36864847	BD-1047	Adrenergic receptor antagonist
2768	7.45	cp	BRD-A56245458	reichstein	Androgen receptor antagonist
2765	7.59	cp	BRD-K87573634	propylpyrazole	Estrogen receptor agonist
2756	8.03	cp	BRD-A98299281	velnacrine	cholinesterase inhibitor
2753	8.18	cp	BRD-A34706053	CGP-12177	Adrenergic receptor agonist
2751	8.32	cp	BRD-A85025557	NCS-382	GABA receptor antagonist
2746	8.73	cp	BRD-A24122750	saclofen	GABA receptor antagonist
2742	9.13	cp	BRD-K13664374	dichloroacetic-acid	Pyruvate dehydrogenase kinase inhibitor
2737	9.64	cp	BRD-K79124250	ioxaglic-acid	Radiopaque medium
2736	9.75	cp	BRD-A47494775	dipivefrine	Adrenergic receptor agonist
2733	10.07	cp	BRD-A70449690	forskolin	Adenylyl cyclase activator
2728	10.45	cp	BRD-A56675431	altizide	Thiazide diuretic
2726	10.54	cp	BRD-A02710418	meptazinol	Opioid receptor agonist
2725	10.59	cp	BRD-A87387433	cefpodoxime	Bacterial cell wall synthesis inhibitor
2719	10.82	cp	BRD-K93034159	cladribine	Adenosine deaminase inhibitor
2714	11.11	cp	BRD-A41304429	practolol	Adrenergic receptor antagonist
2711	11.32	cp	BRD-M45964048	verteporfin	Photosensitizing agent
2709	11.37	cp	BRD-K77390737	xanthohumol	ATPase inhibitor
2710	11.37	cp	BRD-K40782193	QX-222	Sodium channel blocker
2706	11.47	cp	BRD-K41713976	E-4031	Potassium channel blocker
2705	11.56	cp	BRD-K29673530	hypericin	Tyrosine kinase inhibitor
2703	11.66	cp	BRD-A78391468	prednisolone	Glucocorticoid receptor agonist
2699	11.84	cp	BRD-A37776212	ICI-204448	Opioid receptor agonist
2698	11.87	cp	BRD-K13800121	parecoxib	Cyclooxygenase inhibitor
2697	11.91	cp	BRD-A06726973	dibutyrylcyclic-gmp	cGMP analog
2696	12.04	cp	BRD-K95851186	CGP-13501	GABA receptor modulator
2695	12.05	cp	BRD-K88358234	xaliproden	Serotonin receptor agonist
2687	12.35	cp	BRD-K99696746	fatostatin	SREBP inhibitor
2686	12.39	cp	BRD-K30867024	SB-216641	Serotonin receptor antagonist
2683	12.48	cp	BRD-K61192372	capecitabine	DNA synthesis inhibitor
2682	12.51	cp	BRD-A64933752	CV-1808	Adenosine receptor agonist
2681	12.56	cp	BRD-A31521121	methocarbamol	Muscle relaxant
2664	13.5	cp	BRD-A74667430	etodolac	Cyclooxygenase inhibitor
2662	13.59	cp	BRD-K18194590	mephentermine	Adrenergic receptor agonist
2663	13.59	cp	BRD-K72093121	vidarabine	Antiviral
2661	13.6	cp	BRD-K59256312	gabexate	Serine protease inhibitor
2660	13.7	cp	BRD-K99174507	cardiogenol-c	Cardiomyogenesis inducer
2656	13.9	cp	BRD-K32755366	reserpic-acid	Norepinephrine transporter inhibitor
2654	14.01	cp	BRD-K68867920	quetiapine	Dopamine receptor antagonist
2652	14.11	cp	BRD-K21565985	xylazine	Adrenergic receptor agonist
2651	14.12	cp	BRD-K63792901	arecaidine	Acetylcholine receptor agonist
2649	14.28	cp	BRD-K71035033	masitinib	KIT inhibitor
2645	14.51	cp	BRD-K51941867	LM-1685	Cyclooxygenase inhibitor
2646	14.51	cp	BRD-A57457122	VU-0400071-3	Glutamate receptor modulator
2643	14.64	cp	BRD-K28667793	pyrazinamide	Fatty acid synthase inhibitor
2635	14.88	cp	BRD-A34208323	VU-0404997-2	Glutamate receptor modulator
2634	14.9	cp	BRD-A09161221	nomilin	HSP inhibitor
2629	15.05	cp	BRD-A54845972	dihydroergotamine	Serotonin receptor agonist
2627	15.11	cp	BRD-K33860217	CP-94253	Serotonin receptor agonist
2626	15.12	cp	BRD-K97056771	HY-11007	BCR-ABL kinase inhibitor
2625	15.19	cp	BRD-K32536677	AGK-2	SIRT inhibitor
2623	15.23	cp	BRD-A35033682	eriodictyol	Cytochrome P450 inhibitor
2619	15.42	cp	BRD-K60640630	mometasone	Glucocorticoid receptor agonist
2613	15.75	cp	BRD-K49657628	tyrphostin-AG-18	EGFR inhibitor
2612	15.85	cp	BRD-K98521173	desoxycortone	Mineralocorticoid receptor agonist
2610	15.92	cp	BRD-K79684402	RO-10-5824	Dopamine receptor agonist
2608	15.95	cp	BRD-K04976539	aminogenistein	SRC inhibitor
2606	16.06	cp	BRD-K74430258	1,2-dichlorobenzene	Hepatotoxicant
2601	16.14	cp	BRD-K63913457	eicosatrienoic-acid	Vasodilator
2599	16.27	cp	BRD-K32645441	dipropyl-5ct	Serotonin receptor agonist
2594	16.4	cp	BRD-K34437622	BRD-K34437622	Thymidylate synthase inhibitor
2595	16.4	cp	BRD-A81795050	U-18666A	Oxidosqualene cyclase inhibitor
2593	16.44	cp	BRD-K34014345	naproxol	Anti-inflammatory
2590	16.61	cp	BRD-A31800922	procyclidine	Acetylcholine receptor antagonist
2584	16.94	cp	BRD-K66956375	oleoylethanolamide	Cannabinoid receptor agonist
2580	16.99	cp	BRD-K19360254	ergocornine	Dopamine receptor agonist
2576	17.08	cp	BRD-K85925969	zalcitabine	Nucleoside reverse transcriptase inhibitor
2571	17.3	cp	BRD-K74141488	naftifine	Fungal squalene epoxidase inhibitor
2566	17.49	cp	BRD-A41995253	brucine	Glycine receptor antagonist
2562	17.56	cp	BRD-K26117720	gingerol	Nitric oxide synthase inhibitor
2561	17.6	cp	BRD-A22769835	homochlorcyclizine	Antihistamine
2550	17.88	cp	BRD-K79116891	proxymetacaine	Sodium channel blocker
2548	17.89	cp	BRD-K68507560	dicycloverine	Acetylcholine receptor antagonist
2544	18.1	cp	BRD-K49404994	levetiracetam	Calcium channel blocker
2540	18.24	cp	BRD-K08619574	thioproperazine	Dopamine receptor antagonist
2539	18.3	cp	BRD-K53979406	ALX-5407	Glycine transporter inhibitor
2538	18.31	cp	BRD-K86204871	terconazole	Sterol demethylase inhibitor
2536	18.53	cp	BRD-A93206962	L-755507	Adrenergic receptor agonist
2535	18.55	cp	BRD-K96319534	phentermine	Dopamine uptake inhibitor
2526	18.77	cp	BRD-A15131297	benazepril	ACE inhibitor
2525	18.79	cp	BRD-A53131506	epitestosterone	Inactive testosterone analog
2523	18.98	cp	BRD-A10303790	talampicillin	Bacterial cell wall synthesis inhibitor
2522	19.02	cp	BRD-K12932420	YM-976	Phosphodiesterase inhibitor
2520	19.06	cp	BRD-A62434282	goserelin	Gonadotropin releasing factor hormone receptor agonist
2521	19.06	cp	BRD-K47639036	flavoxate	Acetylcholine receptor antagonist
2516	19.14	cp	BRD-K09497549	kawain	Calcium channel modulator
2515	19.29	cp	BRD-K70511574	sunitinib	PLK inhibitor
2513	19.35	cp	BRD-K37618799	MRS-1220	Adenosine receptor antagonist
2509	19.74	cp	BRD-K55034111	pefloxacin	Bacterial DNA gyrase inhibitor
2502	20.11	cp	BRD-K07888196	tyrphostin-AG-538	IGF-1 inhibitor
2500	20.14	cp	BRD-K38449220	seneciphylline	Cytochrome P450 inhibitor
2499	20.15	cp	BRD-K93280214	gabazine	GABA receptor antagonist
2493	20.42	cp	BRD-K56700933	phenethyl-isothiocyanate	Antineoplastic
2486	20.69	cp	BRD-A20131130	2',5'-dideoxyadenosine	Adenylyl cyclase inhibitor
2484	20.73	cp	BRD-K35723520	darinaparsin	Apoptosis stimulant
2483	20.77	cp	BRD-K64935403	ebelactone-b	Lipase inhibitor
2482	20.79	cp	BRD-K28863208	PNU-282987	Cholinergic receptor agonist
2481	20.82	cp	BRD-K15868788	SDZ-205-557	Serotonin receptor antagonist
2479	20.84	cp	BRD-K28667196	fillalbin	Increases arterial blood pressure
2476	21.02	cp	BRD-K36965586	m-chlorophenylbiguanide	Serotonin receptor agonist
2471	21.14	cp	BRD-K60770992	pergolide	Dopamine receptor agonist
2470	21.15	cp	BRD-K70881766	solanine	Acetylcholinesterase inhibitor
2469	21.16	cp	BRD-A67605442	tetrahydrobiopterin	Nitric oxide stimulant
2462	21.41	cp	BRD-K70330367	amantadine	Glutamate receptor antagonist
2458	21.47	cp	BRD-A80928489	1-monopalmitin	P-glycoprotein inhibitor
2459	21.47	cp	BRD-K45861246	azaperone	Dopamine receptor antagonist
2457	21.48	cp	BRD-K26521938	dinoprostone	Prostanoid receptor agonist
2455	21.63	cp	BRD-K48168960	propylthiouracil	Thyroid peroxidase inhibitor
2453	21.67	cp	BRD-K27184429	levocetirizine	Histamine receptor antagonist
2449	21.85	cp	BRD-K74195153	irsogladine	Phosphodiesterase inhibitor
2445	21.97	cp	BRD-A38913120	BH3I-1	BCL inhibitor
2444	22.08	cp	BRD-K80315159	DPPE	Histamine receptor antagonist
2441	22.27	cp	BRD-K00234327	RU-24969	Serotonin receptor agonist
2436	22.31	cp	BRD-A51393488	noscapine	Bradykinin receptor antagonist
2422	22.63	cp	BRD-K50325075	UCL-2077	Slow after hyperpolarization channel blocker
2421	22.66	cp	BRD-K91290917	amodiaquine	Histamine receptor agonist
2414	22.92	cp	BRD-A56012032	thiorphan	Membrane metalloendopeptidase inhibitor
2413	22.97	cp	BRD-K63979671	etifenin	Compound used in hepatobiliary scans of the liver
2407	23.04	cp	BRD-K59851896	calycanthine	GABA release inhibitor
2406	23.08	cp	BRD-U66370498	androstanol	CAR antagonist
2398	23.26	cp	BRD-K47631482	bromhexine	Mucolytic agent
2393	23.48	cp	BRD-K18905250	ST-91	Adrenergic receptor agonist
2390	23.6	cp	BRD-A80793822	pemoline	Dopamine receptor agonist
2386	23.66	cp	BRD-K00662280	CL-218872	GABA receptor agonist
2383	23.76	cp	BRD-K16554956	PTB1	AMPK activator
2378	23.92	cp	BRD-K56596464	QX-314	Sodium channel blocker
2377	23.98	cp	BRD-K35458079	edaravone	Nootropic agent
2374	24.06	cp	BRD-K78633253	EXO-1	ARF inhibitor
2371	24.11	cp	BRD-K08640512	RS-100329	Adrenergic receptor antagonist
2368	24.22	cp	BRD-K96134740	kitasamycin	Protein synthesis inhibitor
2365	24.3	cp	BRD-K46317332	proadifen	Nitric oxide synthase inhibitor
2362	24.44	cp	BRD-A78322124	dobutamine	Adrenergic receptor agonist
2361	24.45	cp	BRD-K71103788	duloxetine	Serotonin reuptake inhibitor
2357	24.56	cp	BRD-K82484965	carmoxirole	Dopamine receptor agonist
2355	24.69	cp	BRD-A84702196	penicillin	Bacterial cell wall synthesis inhibitor
2349	24.85	cp	BRD-K08206212	entecavir	Reverse transcriptase inhibitor
2346	24.91	cp	BRD-K18316707	O-1918	Cannabinoid receptor antagonist
2345	24.92	cp	BRD-A96882008	L-732138	Tachykinin antagonist
2344	24.98	cp	BRD-K46766488	S-14506	Serotonin receptor agonist
2343	25.05	cp	BRD-K43290182	Ro-04-6790	Serotonin receptor antagonist
2342	25.13	cp	BRD-K63874012	thioperamide	Histamine receptor antagonist
2341	25.23	cp	BRD-K59037100	oxybenzone	Lipase inhibitor
2335	25.46	cp	BRD-K36927236	glibenclamide	Sulfonylurea
2332	25.53	cp	BRD-K96119599	leucodin	Melanin inhibitor
2328	25.67	cp	BRD-A98702003	carbenoxolone	11-beta-HSD1 inhibitor
2327	25.69	cp	BRD-K60160658	tiagabine	GABA uptake inhibitor
2325	25.77	cp	BRD-K07507905	BRL-37344	Adrenergic receptor agonist
2322	25.79	cp	BRD-A15415227	GW-1929	PPAR receptor agonist
2319	25.87	cp	BRD-M07438658	lapatinib	EGFR inhibitor
2315	26.01	cp	BRD-K20920669	cromoglicic-acid	Immunosuppressant
2314	26.02	cp	BRD-K80970344	pyrrolidine-dithiocarbamate	NFkB pathway inhibitor
2304	26.23	cp	BRD-K28115081	apafant	Platelet activating factor receptor antagonist
2303	26.28	cp	BRD-A26032986	zaldaride	Calmodulin antagonist
2301	26.31	cp	BRD-K71731651	PNU-120596	Acetylcholine receptor agonist
2297	26.49	cp	BRD-A62890442	3-methyl-GABA	GABA aminotransferase activator
2296	26.5	cp	BRD-K35483542	alitretinoin	Retinoid receptor agonist
2294	26.55	cp	BRD-K81272440	dantrolene	Calcium channel blocker
2288	26.65	cp	BRD-A02180903	betamethasone	Glucocorticoid receptor agonist
2286	26.68	cp	BRD-K08556791	ethoprop	Acetylcholinesterase inhibitor
2284	26.76	cp	BRD-A15034104	bergenin	Interleukin inhibitor
2283	26.8	cp	BRD-M47937986	cefatrizine	Bacterial cell wall synthesis inhibitor
2282	26.81	cp	BRD-K20141153	atomoxetine	Norepinephrine transporter inhibitor
2278	26.92	cp	BRD-K73838513	cinacalcet	Calcium channel activator
2277	26.94	cp	BRD-K71289571	zafirlukast	Leukotriene receptor antagonist
2275	26.95	cp	BRD-A62071884	siguazodan	Phosphodiesterase inhibitor
2274	26.96	cp	BRD-A42167015	carteolol	Adrenergic receptor antagonist
2268	27.23	cp	BRD-K89046952	ciclacillin	Bacterial cell wall synthesis inhibitor
2265	27.28	cp	BRD-K10176267	L-701252	Glutamate receptor antagonist
2255	27.65	cp	BRD-K97330509	SRC-kinase-inhibitor-II	SRC inhibitor
2253	27.7	cp	BRD-K61217870	n-(3-acetamidophenyl)-3-chlorobenzamide	Glutamate receptor antagonist
2249	27.94	cp	BRD-K09668667	benzo(a)pyrene	Carcinogen
2245	28.04	cp	BRD-K57179821	crotamiton	Antipruritic
2243	28.11	cp	BRD-A79981887	midodrine	Adrenergic receptor agonist
2242	28.13	cp	BRD-K47539947	tetradecylthioacetic-acid	Lipid peroxidase inhibitor
2238	28.26	cp	BRD-K29582677	flunarizine	Calcium channel blocker
2237	28.27	cp	BRD-K32977963	eugenol	Androgen receptor antagonist
2236	28.3	cp	BRD-K67043667	altretamine	DNA synthesis inhibitor
2234	28.35	cp	BRD-K19605405	ZM-241385	Adenosine receptor antagonist
2227	28.5	cp	BRD-K67445247	flurofamide	Urease inhibitor
2224	28.59	cp	BRD-K15086322	JNJ-10191584	Histamine receptor antagonist
2222	28.69	cp	BRD-A49172652	lansoprazole	ATPase inhibitor
2218	28.79	cp	BRD-K44849676	capsazepine	TRPV agonist
2214	28.94	cp	BRD-K80725821	RS-16566	Serotonin receptor antagonist
2207	29.06	cp	BRD-K21971034	OM-137	Aurora kinase inhibitor
2204	29.24	cp	BRD-A01787639	naftopidil	Adrenergic receptor antagonist
2198	29.66	cp	BRD-K86434416	selegiline	Monoamine oxidase inhibitor
2193	29.74	cp	BRD-K06817181	BRD-K06817181	JAK inhibitor
2194	29.74	cp	BRD-K52721684	PCO-400	Potassium channel activator
2191	29.81	cp	BRD-K27871032	lysergol	Ergoline alkaloid
2190	29.83	cp	BRD-K23204545	busulfan	DNA inhibitor
2179	30.1	cp	BRD-K95402279	geranylgeraniol	Farnesyltransferase inhibitor
2170	30.44	cp	BRD-A73741725	exemestane	Aromatase inhibitor
2169	30.47	cp	BRD-K18855837	varenicline	Acetylcholine receptor agonist
2167	30.56	cp	BRD-K91315211	betahistine	Histamine receptor agonist
2162	30.68	cp	BRD-K85242180	beta-CCP	Indoleamine 2,3-dioxygenase inhibitor
2161	30.71	cp	BRD-K84566043	fenpiverinium	Acetylcholine receptor antagonist
2146	31.04	cp	BRD-K77793136	hydroxyfasudil	Rho associated kinase inhibitor
2140	31.21	cp	BRD-K45988865	tetramethylsilane	Internal standard for NMR spectroscopy
2138	31.22	cp	BRD-A43974575	tranylcypromine	Monoamine oxidase inhibitor
2136	31.26	cp	BRD-A02990301	lofexidine	Adrenergic receptor agonist
2131	31.35	cp	BRD-K52394958	GR-159897	Tachykinin antagonist
2129	31.38	cp	BRD-K26863634	BIX-01338	Histone lysine methyltransferase inhibitor
2126	31.48	cp	BRD-K28137194	loreclezole	GABA receptor agonist
2107	31.94	cp	BRD-K09255212	clioquinol	Chelating agent
2105	32.01	cp	BRD-K37456065	VU-0365114-2	M5 modulator
2104	32.04	cp	BRD-K64157027	ZD-2079	Adrenergic receptor agonist
2101	32.18	cp	BRD-K93645900	tadalafil	Phosphodiesterase inhibitor
2099	32.24	cp	BRD-K57304726	PRE-084	Sigma receptor agonist
2098	32.41	cp	BRD-K31283835	tofacitinib	JAK inhibitor
2095	32.49	cp	BRD-K06926592	tretinoin	Retinoid receptor agonist
2094	32.55	cp	BRD-K92731339	perindopril	ACE inhibitor
2092	32.59	cp	BRD-K99411983	lumicolchicine	Colchicine isomer, non-binder of microtubules
2085	32.79	cp	BRD-A14574269	UB-165	Acetylcholine receptor agonist
2083	32.85	cp	BRD-K05658747	raltegravir	HIV integrase inhibitor
2078	32.97	cp	BRD-A65440446	cimaterol	Adrenergic receptor agonist
2075	33.08	cp	BRD-K32610195	androstenedione	Cytochrome P450 inhibitor
2070	33.4	cp	BRD-K50311478	tosyl-phenylalanyl-chloromethyl-ketone	Chymotrypsin inhibitor
2068	33.54	cp	BRD-K43887077	dopamine	Dopamine receptor agonist
2062	33.66	cp	BRD-K48427617	U-0124	MEK inhibitor
2059	33.75	cp	BRD-K50938287	sumatriptan	Serotonin receptor agonist
2057	33.76	cp	BRD-K46142322	RS-67333	Serotonin receptor partial agonist
2053	33.84	cp	BRD-A54880345	etomidate	GABA receptor modulator
2037	34.53	cp	BRD-K48722833	iloperidone	Dopamine receptor antagonist
2034	34.79	cp	BRD-K02715688	hydrastine	Tyrosine hydroxylase inhibitor
2032	34.85	cp	BRD-A97104540	fenoterol	Adrenergic receptor agonist
2031	34.89	cp	BRD-K54708045	nTZDpa	PPAR receptor agonist
2028	35.01	cp	BRD-K15502390	nevirapine	Reverse transcriptase inhibitor
2018	35.34	cp	BRD-K96354014	nifedipine	Calcium channel blocker
2014	35.4	cp	BRD-K56614220	clofazimine	GK0582 inhibitor
2011	35.53	cp	BRD-K60690191	MPEP	Glutamate receptor antagonist
2010	35.54	cp	BRD-K21520694	sulfacetamide	PABA antagonist
2009	35.56	cp	BRD-K83637872	SANT-1	Smoothened receptor antagonist
2008	35.59	cp	BRD-K67844266	MLN-4924	Nedd activating enzyme inhibitor
2004	35.64	cp	BRD-K08287586	butylparaben	DNA synthesis inhibitor
2003	35.67	cp	BRD-K37130656	rivaroxaban	Coagulation inhibitor
2002	35.68	cp	BRD-K60230970	MG-132	Proteasome inhibitor
2000	35.74	cp	BRD-K45542189	diethylcarbamazine	Lipoxygenase inhibitor
1999	35.75	cp	BRD-A44090213	indoprofen	Cyclooxygenase inhibitor
1995	35.79	cp	BRD-A92826379	lupanine	Sodium channel blocker
1996	35.79	cp	BRD-K67017579	cilostazol	Phosphodiesterase inhibitor
1992	35.83	cp	BRD-K85985071	ellipticine	Topoisomerase inhibitor
1990	35.9	cp	BRD-K73589491	nizatidine	Histamine receptor antagonist
1983	36.03	cp	BRD-A67862938	naftidrofuryl	Adrenergic receptor antagonist
1977	36.24	cp	BRD-K43236057	piceid	ICAM1 inhibitor
1974	36.29	cp	BRD-K82983861	GW-0742	PPAR receptor agonist
1971	36.31	cp	BRD-K23583188	lavendustin-a	EGFR inhibitor
1972	36.31	cp	BRD-K93258693	GW-9662	PPAR receptor antagonist
1968	36.47	cp	BRD-K48923948	BMS-641988	Androgen receptor antagonist
1966	36.53	cp	BRD-K94070024	depomedrol	Glucocorticoid receptor agonist
1962	36.66	cp	BRD-K85119730	tolbutamide	ATP channel blocker
1960	36.74	cp	BRD-K97354755	SU-6656	SRC inhibitor
1959	36.75	cp	BRD-A13188892	doxazosin	Adrenergic receptor antagonist
1957	36.77	cp	BRD-K74501079	azithromycin	Bacterial 50S ribosomal subunit inhibitor
1956	36.81	cp	BRD-K20986251	lithocholic-acid	FXR antagonist
1952	36.96	cp	BRD-K96263742	GW-7647	PPAR receptor agonist
1948	37.07	cp	BRD-K63430059	methoxsalen	DNA synthesis inhibitor
1944	37.27	cp	BRD-K76810206	nicergoline	Adrenergic receptor antagonist
1942	37.33	cp	BRD-K67102207	phenylbutyrate	HDAC inhibitor
1938	37.39	cp	BRD-A56359832	zileuton	Leukotriene inhibitor
1937	37.41	cp	BRD-K07325606	hispidin	PKC inhibitor
1934	37.45	cp	BRD-A08187463	racecadotril	Enkephalinase inhibitor
1932	37.48	cp	BRD-K76274772	MAPP-D-erythro	Ceramidase inhibitor
1929	37.51	cp	BRD-A26845397	isamoltan	Adrenergic receptor antagonist
1925	37.71	cp	BRD-A53952395	prilocaine	Local anesthetic
1921	37.84	cp	BRD-A87479750	tenidap	Cyclooxygenase inhibitor
1922	37.84	cp	BRD-K18816859	L-694247	Serotonin receptor agonist
1908	38.29	cp	BRD-K22031190	diflunisal	Prostanoid receptor antagonist
1899	38.47	cp	BRD-A62809825	thapsigargin	ATPase inhibitor
1895	38.63	cp	BRD-K12762134	XAV-939	Tankyrase inhibitor
1890	38.81	cp	BRD-A43974499	reboxetine	Adrenergic receptor antagonist
1886	38.93	cp	BRD-K64514229	toltrazuril	Antiprotozoal
1883	39.02	cp	BRD-K76723084	isotretinoin	Retinoid receptor agonist
1882	39.07	cp	BRD-K77925998	quipazine	Serotonin receptor agonist
1877	39.25	cp	BRD-K74763371	bosentan	Endothelin receptor antagonist
1868	39.51	cp	BRD-K04412738	tramadol	Norepinephrine reuptake inhibitor
1862	39.69	cp	BRD-K72029282	probucol	Atherogenesis inhibitor
1852	39.95	cp	BRD-K93188295	ARC-239	Adrenergic receptor antagonist
1847	40.18	cp	BRD-A49358627	ciprofibrate	PPAR receptor agonist
1846	40.19	cp	BRD-K36638830	anabasine	Acetylcholine receptor agonist
1837	40.45	cp	BRD-K01902415	pirinixic-acid	PPAR receptor agonist
1832	40.61	cp	BRD-A43930669	L-368899	Oxytocin receptor antagonist
1828	40.76	cp	BRD-K49519092	immethridine	Histamine receptor agonist
1826	40.79	cp	BRD-K08924299	palonosetron	Serotonin receptor antagonist
1824	40.84	cp	BRD-K87696786	LY-456236	Glutamate receptor antagonist
1820	40.96	cp	BRD-K13032584	procarbazine	Monoamine oxidase inhibitor
1806	41.36	cp	BRD-K53570330	carbofuran	Cholinesterase inhibitor
1792	41.67	cp	BRD-K14696368	9-methyl-5H-6-thia-4,5-diaza-chrysene-6,6-dioxide	NFkB pathway inhibitor
1780	42.17	cp	BRD-A92439610	triamcinolone	Glucocorticoid receptor agonist
1775	42.25	cp	BRD-K51751936	alfadolone	GABA receptor agonist
1774	42.27	cp	BRD-A30590053	MR-16728	Acetylcholine release enhancer
1771	42.42	cp	BRD-K92723993	imatinib	BCR-ABL kinase inhibitor
[truncated: 430 more rows]

## Sheet: Intersection
Type	ID	Name	Description
cp	BRD-K85606544	neratinib	EGFR inhibitor
cp	BRD-A02481876	importazole	Importin-beta transport receptor inhibitor
cp	BRD-A45498368	WYE-125132	MTOR inhibitor
cp	BRD-K30097969	pitavastatin	HMGCR inhibitor
cp	BRD-K04466929	Merck60	HDAC inhibitor
cp	BRD-A36630025	SN-38	Topoisomerase inhibitor
cp	BRD-K15592317	CP466722	ATM kinase inhibitor
cp	BRD-K19540840	saracatinib	SRC inhibitor
cp	BRD-K68065987	MK-2206	AKT inhibitor
cp	BRD-K49669041	BX-912	Pyruvate dehydrogenase kinase inhibitor
cp	BRD-K17953061	staurosporine	PKC inhibitor
cp	BRD-A19248578	latrunculin-b	Actin polymerization inhibitor
